# Supplementary material for: Cryopreservation Induces Acetylation of Metabolism-Related Proteins in Boar Sperm
Source: Int J Mol Sci. 2023 Jul 1;24(13):10983. doi: 10.3390/ijms241310983 (PMC10341673; doi:10.3390/ijms241310983)
Supplement: Supplementary file 1 [file ijms-24-10983-s001.zip]

Archive with 4 entries (4 files):
- Differentially expressed sites and proteins between fresh and frozen-thawed boar sperm.xlsx
- GO enrichment of differentially expressed proteins between fresh and frozen-thawed boar sperm.xlsx
- KEGG pathway enrichment of differentially expressed proteins between fresh and frozen-thawed boar sperm.xlsx
- Supplementary Figures S1 and S2.pdf
