# Supplementary material for: Cryopreservation Induces Acetylation of Metabolism-Related Proteins in Boar Sperm
Source: Int J Mol Sci. 2023 Jul 1;24(13):10983. doi: 10.3390/ijms241310983 (PMC10341673; doi:10.3390/ijms241310983)
Supplement: Supplementary file 1 [file ijms-24-10983-s001.zip › Differentially expressed sites and proteins between fresh and frozen-thawed boar sperm.xlsx]

## Sheet: Diff_distribution
Compared sample name	Type	Up-regulated	Down-regulated
Fts/Fs	Site	1251	171
	Protein	505	98

## Sheet: FtsvsFs
Protein accession	Position	Amino acid	Fts/Fs Ratio	Fts/Fs P value	Regulated Type	Protein description	Gene name	Localization probability	PEP	Score	Charge	Modified sequence	Mass error [ppm]	Fts_1	Fts_2	Fts_3	Fs_1	Fs_2	Fs_3	Subcellular localization	KEGG KO No.	KEGG Gene	KEGG pathway	Biological Process	Cellular Component	Molecular Function	Pfam ID	Domain description	KOG category	KOG NO.	KOG description
A0A0A8IK66	53	K	0.009	0.00379609	Down	Heparin-binding protein WGA16 OS=Sus scrofa OX=9823 GN=wga16 PE=1 SV=1	wga16	1	4.39815e-30	281.41	3	VFVGPVGLIK(1)SIQVRYGSSWSEK	0.85961	0.0360727	0.00601817	0.00922117	4.3484	0.801529	0.798761	extracellular							PF01419	Jacalin-like lectin domain
A0A0A8IK66	73	K	0.033	0.0140057	Down	Heparin-binding protein WGA16 OS=Sus scrofa OX=9823 GN=wga16 PE=1 SV=1	wga16	1	6.84454e-111	385.32	5	YGIPGGK(1)AHELILHPGEHIISIYGR	-1.0232	0.136024	0.0147465	0.0393651	4.11712	0.979618	0.713127	extracellular							PF01419	Jacalin-like lectin domain
A0A286ZUP1	70	K	4.021	0.021402	Up	Complement component 1 Q subcomponent-binding protein, mitochondrial OS=Sus scrofa OX=9823 GN=C1QBP PE=3 SV=1	C1QBP	1	1.40198e-09	232.14	2	AFVEFLNDEIK(1)EEK	-0.058356	1.52511	2.08628	1.19368	0.593344	0.17151	0.430082	extracellular	K15414	C1QBP; complement component 1 Q subcomponent-binding protein, mitochondrial		GO:0000122 negative regulation of transcription by RNA polymerase II; GO:0001817 regulation of cytokine production; GO:0001818 negative regulation of cytokine production; GO:0002376 immune system process; GO:0002673 regulation of acute inflammatory response; GO:0002682 regulation of immune system process; GO:0002683 negative regulation of immune system process; GO:0002684 positive regulation of i…	GO:0005576 extracellular region; GO:0005615 extracellular space; GO:0005622 intracellular; GO:0005623 cell; GO:0005634 nucleus; GO:0005737 cytoplasm; GO:0005739 mitochondrion; GO:0005829 cytosol; GO:0005886 plasma membrane; GO:0009986 cell surface; GO:0016020 membrane; GO:0032991 protein-containing complex; GO:0043226 organelle; GO:0043227 membrane-bounded organelle; GO:0043229 intracellular orga…	GO:0001664 G protein-coupled receptor binding; GO:0001846 opsonin binding; GO:0001848 complement binding; GO:0001849 complement component C1q complex binding; GO:0003676 nucleic acid binding; GO:0003712 transcription coregulator activity; GO:0003714 transcription corepressor activity; GO:0003723 RNA binding; GO:0003729 mRNA binding; GO:0005080 protein kinase C binding; GO:0005102 signaling recept…	PF02330	Mitochondrial glycoprotein	K	KOG4024	Complement component 1, Q subcomponent binding protein/mRNA splicing factor SF2, subunit P32
A0A286ZUP1	73	K	11.393	0.0226966	Up	Complement component 1 Q subcomponent-binding protein, mitochondrial OS=Sus scrofa OX=9823 GN=C1QBP PE=3 SV=1	C1QBP	0.999998	3.6098e-40	314.29	2	AFVEFLNDEIKEEK(1)K	-0.7902		1.79907	2.61923	0.384649	0.108877	0.0881697	extracellular	K15414	C1QBP; complement component 1 Q subcomponent-binding protein, mitochondrial		GO:0000122 negative regulation of transcription by RNA polymerase II; GO:0001817 regulation of cytokine production; GO:0001818 negative regulation of cytokine production; GO:0002376 immune system process; GO:0002673 regulation of acute inflammatory response; GO:0002682 regulation of immune system process; GO:0002683 negative regulation of immune system process; GO:0002684 positive regulation of i…	GO:0005576 extracellular region; GO:0005615 extracellular space; GO:0005622 intracellular; GO:0005623 cell; GO:0005634 nucleus; GO:0005737 cytoplasm; GO:0005739 mitochondrion; GO:0005829 cytosol; GO:0005886 plasma membrane; GO:0009986 cell surface; GO:0016020 membrane; GO:0032991 protein-containing complex; GO:0043226 organelle; GO:0043227 membrane-bounded organelle; GO:0043229 intracellular orga…	GO:0001664 G protein-coupled receptor binding; GO:0001846 opsonin binding; GO:0001848 complement binding; GO:0001849 complement component C1q complex binding; GO:0003676 nucleic acid binding; GO:0003712 transcription coregulator activity; GO:0003714 transcription corepressor activity; GO:0003723 RNA binding; GO:0003729 mRNA binding; GO:0005080 protein kinase C binding; GO:0005102 signaling recept…	PF02330	Mitochondrial glycoprotein	K	KOG4024	Complement component 1, Q subcomponent binding protein/mRNA splicing factor SF2, subunit P32
A0A287AYW6	165	K	4.506	0.0192563	Up	Component 3 of promoter of RISC OS=Sus scrofa OX=9823 GN=TSN PE=1 SV=1	TSN	1	0.0131905	86.624	2	LLNLK(1)NDSLR	0.82182	1.04819	1.15699	2.15037		0.265998	0.378451	cytoplasm				GO:0006139 nucleobase-containing compound metabolic process; GO:0006259 DNA metabolic process; GO:0006310 DNA recombination; GO:0006725 cellular aromatic compound metabolic process; GO:0006807 nitrogen compound metabolic process; GO:0008152 metabolic process; GO:0009987 cellular process; GO:0034641 cellular nitrogen compound metabolic process; GO:0043170 macromolecule metabolic process; GO:004423…	GO:0005622 intracellular; GO:0005623 cell; GO:0005634 nucleus; GO:0005737 cytoplasm; GO:0005829 cytosol; GO:0043226 organelle; GO:0043227 membrane-bounded organelle; GO:0043229 intracellular organelle; GO:0043231 intracellular membrane-bounded organelle;	GO:0003676 nucleic acid binding; GO:0003677 DNA binding; GO:0003723 RNA binding; GO:0003729 mRNA binding; GO:0005488 binding; GO:0005515 protein binding; GO:0042802 identical protein binding; GO:0044877 protein-containing complex binding; GO:0097159 organic cyclic compound binding; GO:1901363 heterocyclic compound binding;			S	KOG3067	Translin family protein
P79303	127	K	3.279	0.0438739	Up	UTP--glucose-1-phosphate uridylyltransferase OS=Sus scrofa OX=9823 GN=UGP2 PE=2 SV=3	UGP2	1	0.000306677	177.97	2	GPK(1)SLIGVR	-1.4905	1.31986	1.23851	1.59679	0.618999		0.225832	cytoplasm	K00963	UGP2, galU, galF; UTP--glucose-1-phosphate uridylyltransferase [EC:2.7.7.9]	map00040 Pentose and glucuronate interconversions; map00052 Galactose metabolism; map00500 Starch and sucrose metabolism; map00520 Amino sugar and nucleotide sugar metabolism; map01100 Metabolic pathways	GO:0000271 polysaccharide biosynthetic process; GO:0005975 carbohydrate metabolic process; GO:0005976 polysaccharide metabolic process; GO:0005977 glycogen metabolic process; GO:0005978 glycogen biosynthetic process; GO:0006011 UDP-glucose metabolic process; GO:0006065 UDP-glucuronate biosynthetic process; GO:0006073 cellular glucan metabolic process; GO:0006082 organic acid metabolic process; GO…	GO:0005622 intracellular; GO:0005623 cell; GO:0005737 cytoplasm; GO:0005829 cytosol;	GO:0000166 nucleotide binding; GO:0003824 catalytic activity; GO:0003983 UTP:glucose-1-phosphate uridylyltransferase activity; GO:0005488 binding; GO:0005515 protein binding; GO:0005536 glucose binding; GO:0016740 transferase activity; GO:0016772 transferase activity, transferring phosphorus-containing groups; GO:0016779 nucleotidyltransferase activity; GO:0019103 pyrimidine nucleotide binding; G…			G	KOG2638	UDP-glucose pyrophosphorylase
A0A286ZIE6	85	K	8.879	0.00210231	Up	Enkurin isoform 1 OS=Sus scrofa OX=9823 GN=ENKUR PE=4 SV=1	ENKUR	1	0.016336	158.53	2	K(1)PPVPLR	0.4638	1.60586	1.66836	2.11846	0.334906	0.120214	0.1522	nucleus					GO:0001669 acrosomal vesicle; GO:0005622 intracellular; GO:0005623 cell; GO:0005737 cytoplasm; GO:0005929 cilium; GO:0012505 endomembrane system; GO:0030141 secretory granule; GO:0031410 cytoplasmic vesicle; GO:0031514 motile cilium; GO:0031982 vesicle; GO:0036126 sperm flagellum; GO:0042995 cell projection; GO:0043226 organelle; GO:0043227 membrane-bounded organelle; GO:0043229 intracellular org…	GO:0005488 binding; GO:0005515 protein binding; GO:0005516 calmodulin binding;
A0A286ZIE6	246	K	2.882	0.0390606	Up	Enkurin isoform 1 OS=Sus scrofa OX=9823 GN=ENKUR PE=4 SV=1	ENKUR	1	1.58012e-28	291.22	2	QLEHDIAVLEK(1)HK	-0.81797	1.25026	0.978069	1.83233	0.354891		0.584456	nucleus					GO:0001669 acrosomal vesicle; GO:0005622 intracellular; GO:0005623 cell; GO:0005737 cytoplasm; GO:0005929 cilium; GO:0012505 endomembrane system; GO:0030141 secretory granule; GO:0031410 cytoplasmic vesicle; GO:0031514 motile cilium; GO:0031982 vesicle; GO:0036126 sperm flagellum; GO:0042995 cell projection; GO:0043226 organelle; GO:0043227 membrane-bounded organelle; GO:0043229 intracellular org…	GO:0005488 binding; GO:0005515 protein binding; GO:0005516 calmodulin binding;
A0A287AXS7	272	K	14.258	3.42796e-06	Up	ADP/ATP translocase OS=Sus scrofa OX=9823 GN=SLC25A6 PE=3 SV=1	SLC25A6	1	1.21053e-08	230.06	2	AFFK(1)GAWSNVLR	-0.054483	1.93124	2.03616	1.63937	0.13473	0.122626	0.135878	cytoplasm	K05863	SLC25A4S, ANT; solute carrier family 25 (mitochondrial adenine nucleotide translocator), member 4/5/6/31	map04020 Calcium signaling pathway; map04022 cGMP-PKG signaling pathway; map04217 Necroptosis; map04218 Cellular senescence; map05012 Parkinson disease; map05016 Huntington disease; map05164 Influenza A; map05166 Human T-cell leukemia virus 1 infection						C	KOG0749	Mitochondrial ADP/ATP carrier proteins
F2Z565	23	K	19.868	0.00555429	Up	ADP/ATP translocase OS=Sus scrofa OX=9823 GN=SLC25A5 PE=1 SV=1	SLC25A5	1	1.25466e-60	333.11	3	DFLAGGVAAAISK(1)TAVAPIER	0.15953	1.107	2.05539	2.55009	0.205862	0.0441434	0.037517	cytoplasm	K05863	SLC25A4S, ANT; solute carrier family 25 (mitochondrial adenine nucleotide translocator), member 4/5/6/31	map04020 Calcium signaling pathway; map04022 cGMP-PKG signaling pathway; map04217 Necroptosis; map04218 Cellular senescence; map05012 Parkinson disease; map05016 Huntington disease; map05164 Influenza A; map05166 Human T-cell leukemia virus 1 infection	GO:0006810 transport; GO:0006811 ion transport; GO:0006820 anion transport; GO:0006839 mitochondrial transport; GO:0006855 drug transmembrane transport; GO:0006862 nucleotide transport; GO:0006996 organelle organization; GO:0007005 mitochondrion organization; GO:0007006 mitochondrial membrane organization; GO:0008284 positive regulation of cell population proliferation; GO:0009966 regulation of s…	GO:0005622 intracellular; GO:0005623 cell; GO:0005737 cytoplasm; GO:0005739 mitochondrion; GO:0005740 mitochondrial envelope; GO:0005743 mitochondrial inner membrane; GO:0005819 spindle; GO:0005856 cytoskeleton; GO:0015630 microtubule cytoskeleton; GO:0016020 membrane; GO:0016021 integral component of membrane; GO:0019866 organelle inner membrane; GO:0031090 organelle membrane; GO:0031224 intrins…	GO:0000295 adenine nucleotide transmembrane transporter activity; GO:0005215 transporter activity; GO:0005346 purine ribonucleotide transmembrane transporter activity; GO:0005347 ATP transmembrane transporter activity; GO:0005471 ATP:ADP antiporter activity; GO:0008509 anion transmembrane transporter activity; GO:0008514 organic anion transmembrane transporter activity; GO:0015075 ion transmembra…			C	KOG0749	Mitochondrial ADP/ATP carrier proteins
A0A286ZIE8	166	K	46.698	0.000427864	Up	ADP/ATP translocase OS=Sus scrofa OX=9823 GN=SLC25A4 PE=1 SV=1	SLC25A4	1	0.00325799	139.28	2	IFK(1)SDGLR	-0.23099	1.51104	2.03043	2.33274	0.0609804	0.0193884	0.0454216	mitochondria	K05863	SLC25A4S, ANT; solute carrier family 25 (mitochondrial adenine nucleotide translocator), member 4/5/6/31	map04020 Calcium signaling pathway; map04022 cGMP-PKG signaling pathway; map04217 Necroptosis; map04218 Cellular senescence; map05012 Parkinson disease; map05016 Huntington disease; map05164 Influenza A; map05166 Human T-cell leukemia virus 1 infection	GO:0000002 mitochondrial genome maintenance; GO:0001558 regulation of cell growth; GO:0001889 liver development; GO:0002791 regulation of peptide secretion; GO:0006091 generation of precursor metabolites and energy; GO:0006810 transport; GO:0006811 ion transport; GO:0006820 anion transport; GO:0006839 mitochondrial transport; GO:0006855 drug transmembrane transport; GO:0006862 nucleotide transpor…	GO:0005622 intracellular; GO:0005623 cell; GO:0005737 cytoplasm; GO:0005739 mitochondrion; GO:0005740 mitochondrial envelope; GO:0005741 mitochondrial outer membrane; GO:0005743 mitochondrial inner membrane; GO:0005886 plasma membrane; GO:0005887 integral component of plasma membrane; GO:0016020 membrane; GO:0016021 integral component of membrane; GO:0019866 organelle inner membrane; GO:0019867 o…	GO:0000295 adenine nucleotide transmembrane transporter activity; GO:0005215 transporter activity; GO:0005345 purine nucleobase transmembrane transporter activity; GO:0005346 purine ribonucleotide transmembrane transporter activity; GO:0005347 ATP transmembrane transporter activity; GO:0005471 ATP:ADP antiporter activity; GO:0005488 binding; GO:0005515 protein binding; GO:0008509 anion transmembr…			C	KOG0749	Mitochondrial ADP/ATP carrier proteins
A0A287AXS7	92	K	16.647	0.000108304	Up	ADP/ATP translocase OS=Sus scrofa OX=9823 GN=SLC25A6 PE=3 SV=1	SLC25A6	1	5.90757e-05	188.06	2	YFPTQALNFAFK(1)DK	0.1425	1.45817	2.06844	2.13338	0.136255	0.0852693	0.118482	cytoplasm	K05863	SLC25A4S, ANT; solute carrier family 25 (mitochondrial adenine nucleotide translocator), member 4/5/6/31	map04020 Calcium signaling pathway; map04022 cGMP-PKG signaling pathway; map04217 Necroptosis; map04218 Cellular senescence; map05012 Parkinson disease; map05016 Huntington disease; map05164 Influenza A; map05166 Human T-cell leukemia virus 1 infection						C	KOG0749	Mitochondrial ADP/ATP carrier proteins
A0A5G2QGF5	213	K	23.73	0.00809849	Up	Leucine rich repeat containing 34 OS=Sus scrofa OX=9823 GN=LRRC34 PE=4 SV=1	LRRC34	1	8.37017e-05	118.47	3	ENQCLVELHLSK(1)HDIK	-0.12168	0.900624	1.09965	2.86309		0.054712	0.081917	cytoskeleton									S	KOG4308	LRR-containing protein
A0A5G2QGF5	222	K	23.664	0.00108669	Up	Leucine rich repeat containing 34 OS=Sus scrofa OX=9823 GN=LRRC34 PE=4 SV=1	LRRC34	1	0.000687759	100.41	3	NSGMK(1)HLCDALYLNR	-1.1707	1.19377	1.25815	3.30481	0.10608	0.073663	0.063527	cytoskeleton									S	KOG4308	LRR-containing protein
F1SJV8	160	K	16.494	3.53861e-05	Up	RNA exonuclease 2 OS=Sus scrofa OX=9823 GN=REXO2 PE=1 SV=4	REXO2	1	0.000425972	182.76	2	YMPQFMK(1)HLHYR	-0.3562	2.16478	1.91845	1.57379	0.13504	0.0944897	0.113452	mitochondria	K13288	orn, REX2, REXO2; oligoribonuclease [EC:3.1.-.-]	map03008 Ribosome biogenesis in eukaryotes	GO:0006139 nucleobase-containing compound metabolic process; GO:0006725 cellular aromatic compound metabolic process; GO:0006753 nucleoside phosphate metabolic process; GO:0006793 phosphorus metabolic process; GO:0006796 phosphate-containing compound metabolic process; GO:0006807 nitrogen compound metabolic process; GO:0008152 metabolic process; GO:0009117 nucleotide metabolic process; GO:0009987…	GO:0005622 intracellular; GO:0005623 cell; GO:0005634 nucleus; GO:0005730 nucleolus; GO:0005737 cytoplasm; GO:0005739 mitochondrion; GO:0005740 mitochondrial envelope; GO:0005758 mitochondrial intermembrane space; GO:0005759 mitochondrial matrix; GO:0005912 adherens junction; GO:0005925 focal adhesion; GO:0030054 cell junction; GO:0030055 cell-substrate junction; GO:0031967 organelle envelope; GO…	GO:0000175 3'-5'-exoribonuclease activity; GO:0003824 catalytic activity; GO:0004518 nuclease activity; GO:0004527 exonuclease activity; GO:0004532 exoribonuclease activity; GO:0004540 ribonuclease activity; GO:0008408 3'-5' exonuclease activity; GO:0016787 hydrolase activity; GO:0016788 hydrolase activity, acting on ester bonds; GO:0016796 exonuclease activity, active with either ribo- or deoxyr…			A	KOG3242	Oligoribonuclease (3'->5' exoribonuclease)
A0A286ZJ07	68	K	22.456	0.0133856	Up	Thioredoxin-disulfide reductase OS=Sus scrofa OX=9823 GN=TXNRD2 PE=1 SV=1	TXNRD2	1	5.02067e-07	217.91	3	ASFVNK(1)HTVCGVLK	0.66394	2.17104	2.51589		0.215461	0.0488933	0.0487153	cytoplasm	K22182	TXNRD; thioredoxin reductase (NADPH) [EC:1.8.1.9]	map00450 Selenocompound metabolism; map05200 Pathways in cancer; map05225 Hepatocellular carcinoma	GO:0000302 response to reactive oxygen species; GO:0000305 response to oxygen radical; GO:0002376 immune system process; GO:0002520 immune system development; GO:0006950 response to stress; GO:0006979 response to oxidative stress; GO:0007275 multicellular organism development; GO:0007507 heart development; GO:0008152 metabolic process; GO:0009628 response to abiotic stimulus; GO:0009636 response …	GO:0005622 intracellular; GO:0005623 cell; GO:0005737 cytoplasm; GO:0005739 mitochondrion; GO:0005759 mitochondrial matrix; GO:0005829 cytosol; GO:0030424 axon; GO:0030425 dendrite; GO:0031974 membrane-enclosed lumen; GO:0036477 somatodendritic compartment; GO:0042995 cell projection; GO:0043005 neuron projection; GO:0043025 neuronal cell body; GO:0043226 organelle; GO:0043227 membrane-bounded or…	GO:0003824 catalytic activity; GO:0004791 thioredoxin-disulfide reductase activity; GO:0005488 binding; GO:0005515 protein binding; GO:0015036 disulfide oxidoreductase activity; GO:0016209 antioxidant activity; GO:0016491 oxidoreductase activity; GO:0016651 oxidoreductase activity, acting on NAD(P)H; GO:0016667 oxidoreductase activity, acting on a sulfur group of donors; GO:0016668 oxidoreductase…	PF07992; PF02852	Pyridine nucleotide-disulphide oxidoreductase; Pyridine nucleotide-disulphide oxidoreductase, dimerisation domain	O	KOG4716	Thioredoxin reductase
A0A286ZJ07	41	K	21.067	3.77839e-05	Up	Thioredoxin-disulfide reductase OS=Sus scrofa OX=9823 GN=TXNRD2 PE=1 SV=1	TXNRD2	1	4.23718e-11	168.41	3	MAEAVQNHVK(1)SLNWGHR	-0.41472	1.78599	1.85104	2.09106	0.118499	0.0795185	0.0738861	cytoplasm	K22182	TXNRD; thioredoxin reductase (NADPH) [EC:1.8.1.9]	map00450 Selenocompound metabolism; map05200 Pathways in cancer; map05225 Hepatocellular carcinoma	GO:0000302 response to reactive oxygen species; GO:0000305 response to oxygen radical; GO:0002376 immune system process; GO:0002520 immune system development; GO:0006950 response to stress; GO:0006979 response to oxidative stress; GO:0007275 multicellular organism development; GO:0007507 heart development; GO:0008152 metabolic process; GO:0009628 response to abiotic stimulus; GO:0009636 response …	GO:0005622 intracellular; GO:0005623 cell; GO:0005737 cytoplasm; GO:0005739 mitochondrion; GO:0005759 mitochondrial matrix; GO:0005829 cytosol; GO:0030424 axon; GO:0030425 dendrite; GO:0031974 membrane-enclosed lumen; GO:0036477 somatodendritic compartment; GO:0042995 cell projection; GO:0043005 neuron projection; GO:0043025 neuronal cell body; GO:0043226 organelle; GO:0043227 membrane-bounded or…	GO:0003824 catalytic activity; GO:0004791 thioredoxin-disulfide reductase activity; GO:0005488 binding; GO:0005515 protein binding; GO:0015036 disulfide oxidoreductase activity; GO:0016209 antioxidant activity; GO:0016491 oxidoreductase activity; GO:0016651 oxidoreductase activity, acting on NAD(P)H; GO:0016667 oxidoreductase activity, acting on a sulfur group of donors; GO:0016668 oxidoreductase…	PF07992; PF02852	Pyridine nucleotide-disulphide oxidoreductase; Pyridine nucleotide-disulphide oxidoreductase, dimerisation domain	O	KOG4716	Thioredoxin reductase
A0A286ZJ07	57	K	8.95	0.000392563	Up	Thioredoxin-disulfide reductase OS=Sus scrofa OX=9823 GN=TXNRD2 PE=1 SV=1	TXNRD2	1	0.015336	122.98	2	VK(1)YFNFK	-0.01073	1.82028	1.67039	1.90634	0.276472	0.1387	0.187815	cytoplasm	K22182	TXNRD; thioredoxin reductase (NADPH) [EC:1.8.1.9]	map00450 Selenocompound metabolism; map05200 Pathways in cancer; map05225 Hepatocellular carcinoma	GO:0000302 response to reactive oxygen species; GO:0000305 response to oxygen radical; GO:0002376 immune system process; GO:0002520 immune system development; GO:0006950 response to stress; GO:0006979 response to oxidative stress; GO:0007275 multicellular organism development; GO:0007507 heart development; GO:0008152 metabolic process; GO:0009628 response to abiotic stimulus; GO:0009636 response …	GO:0005622 intracellular; GO:0005623 cell; GO:0005737 cytoplasm; GO:0005739 mitochondrion; GO:0005759 mitochondrial matrix; GO:0005829 cytosol; GO:0030424 axon; GO:0030425 dendrite; GO:0031974 membrane-enclosed lumen; GO:0036477 somatodendritic compartment; GO:0042995 cell projection; GO:0043005 neuron projection; GO:0043025 neuronal cell body; GO:0043226 organelle; GO:0043227 membrane-bounded or…	GO:0003824 catalytic activity; GO:0004791 thioredoxin-disulfide reductase activity; GO:0005488 binding; GO:0005515 protein binding; GO:0015036 disulfide oxidoreductase activity; GO:0016209 antioxidant activity; GO:0016491 oxidoreductase activity; GO:0016651 oxidoreductase activity, acting on NAD(P)H; GO:0016667 oxidoreductase activity, acting on a sulfur group of donors; GO:0016668 oxidoreductase…	PF07992; PF02852	Pyridine nucleotide-disulphide oxidoreductase; Pyridine nucleotide-disulphide oxidoreductase, dimerisation domain	O	KOG4716	Thioredoxin reductase
F1SIK9	155	K	7.029	0.00510714	Up	Septin OS=Sus scrofa OX=9823 GN=SEPTIN7 PE=1 SV=3	SEPTIN7	1	3.02486e-07	218.49	2	ADTLTPEECQQFK(1)K	0.54717	1.25871	1.0879	2.90614	0.310824	0.192489	0.243937	cytoplasm	K16944	SEPT7, CDC3; septin 7	map05131 Shigellosis	GO:0000278 mitotic cell cycle; GO:0000281 mitotic cytokinesis; GO:0000902 cell morphogenesis; GO:0000904 cell morphogenesis involved in differentiation; GO:0000910 cytokinesis; GO:0006996 organelle organization; GO:0007010 cytoskeleton organization; GO:0007049 cell cycle; GO:0007275 multicellular organism development; GO:0007399 nervous system development; GO:0007409 axonogenesis; GO:0008360 regu…	GO:0001725 stress fiber; GO:0005622 intracellular; GO:0005623 cell; GO:0005634 nucleus; GO:0005737 cytoplasm; GO:0005856 cytoskeleton; GO:0005929 cilium; GO:0005930 axoneme; GO:0005938 cell cortex; GO:0005940 septin ring; GO:0015629 actin cytoskeleton; GO:0016020 membrane; GO:0030424 axon; GO:0031105 septin complex; GO:0031514 motile cilium; GO:0032156 septin cytoskeleton; GO:0032160 septin filam…	GO:0005488 binding; GO:0005515 protein binding; GO:0042802 identical protein binding; GO:0046982 protein heterodimerization activity; GO:0046983 protein dimerization activity;	PF00735	Septin	DUZ	KOG2655	Septin family protein (P-loop GTPase)
F1SIK9	245	K	4.026	0.00143966	Up	Septin OS=Sus scrofa OX=9823 GN=SEPTIN7 PE=1 SV=3	SEPTIN7	1	2.50359e-20	242.16	3	THMQDLK(1)DVTNNVHYENYR	0.054411	1.56067	1.20878	1.52017	0.384607	0.325777		cytoplasm	K16944	SEPT7, CDC3; septin 7	map05131 Shigellosis	GO:0000278 mitotic cell cycle; GO:0000281 mitotic cytokinesis; GO:0000902 cell morphogenesis; GO:0000904 cell morphogenesis involved in differentiation; GO:0000910 cytokinesis; GO:0006996 organelle organization; GO:0007010 cytoskeleton organization; GO:0007049 cell cycle; GO:0007275 multicellular organism development; GO:0007399 nervous system development; GO:0007409 axonogenesis; GO:0008360 regu…	GO:0001725 stress fiber; GO:0005622 intracellular; GO:0005623 cell; GO:0005634 nucleus; GO:0005737 cytoplasm; GO:0005856 cytoskeleton; GO:0005929 cilium; GO:0005930 axoneme; GO:0005938 cell cortex; GO:0005940 septin ring; GO:0015629 actin cytoskeleton; GO:0016020 membrane; GO:0030424 axon; GO:0031105 septin complex; GO:0031514 motile cilium; GO:0032156 septin cytoskeleton; GO:0032160 septin filam…	GO:0005488 binding; GO:0005515 protein binding; GO:0042802 identical protein binding; GO:0046982 protein heterodimerization activity; GO:0046983 protein dimerization activity;	PF00735	Septin	DUZ	KOG2655	Septin family protein (P-loop GTPase)
A0A286ZJB1	157	K	5.888	0.0059437	Up	ST6 N-acetylgalactosaminide alpha-2,6-sialyltransferase 2 OS=Sus scrofa OX=9823 GN=ST6GALNAC2 PE=4 SV=2	ST6GALNAC2	1	1.10382e-05	212.09	2	SPSQSGLK(1)SLSR	0.031363	1.56332	1.64205	1.92353	0.511455	0.169057	0.19059	extracellular	K06616	SIAT7B, ST6GalNAc II; alpha-N-acetylgalactosaminide alpha-2,6-sialyltransferase (sialyltransferase 7B) [EC:2.4.99.-]		GO:0005975 carbohydrate metabolic process; GO:0006464 cellular protein modification process; GO:0006486 protein glycosylation; GO:0006487 protein N-linked glycosylation; GO:0006493 protein O-linked glycosylation; GO:0006807 nitrogen compound metabolic process; GO:0008152 metabolic process; GO:0009058 biosynthetic process; GO:0009059 macromolecule biosynthetic process; GO:0009100 glycoprotein meta…	GO:0000139 Golgi membrane; GO:0005622 intracellular; GO:0005623 cell; GO:0005737 cytoplasm; GO:0005794 Golgi apparatus; GO:0012505 endomembrane system; GO:0016020 membrane; GO:0031090 organelle membrane; GO:0031984 organelle subcompartment; GO:0043226 organelle; GO:0043227 membrane-bounded organelle; GO:0043229 intracellular organelle; GO:0043231 intracellular membrane-bounded organelle; GO:00985…	GO:0001665 alpha-N-acetylgalactosaminide alpha-2,6-sialyltransferase activity; GO:0003824 catalytic activity; GO:0008373 sialyltransferase activity; GO:0016740 transferase activity; GO:0016757 transferase activity, transferring glycosyl groups;			G	KOG2692	Sialyltransferase
A0A286ZJB1	240	K	6.26	0.0100753	Up	ST6 N-acetylgalactosaminide alpha-2,6-sialyltransferase 2 OS=Sus scrofa OX=9823 GN=ST6GALNAC2 PE=4 SV=2	ST6GALNAC2	1	1.33806e-56	334.72	2	TPPK(1)SLYFPLLPAPPHYPR	0.58796	1.50284	1.19604	2.4747	0.482719	0.197862	0.14584	extracellular	K06616	SIAT7B, ST6GalNAc II; alpha-N-acetylgalactosaminide alpha-2,6-sialyltransferase (sialyltransferase 7B) [EC:2.4.99.-]		GO:0005975 carbohydrate metabolic process; GO:0006464 cellular protein modification process; GO:0006486 protein glycosylation; GO:0006487 protein N-linked glycosylation; GO:0006493 protein O-linked glycosylation; GO:0006807 nitrogen compound metabolic process; GO:0008152 metabolic process; GO:0009058 biosynthetic process; GO:0009059 macromolecule biosynthetic process; GO:0009100 glycoprotein meta…	GO:0000139 Golgi membrane; GO:0005622 intracellular; GO:0005623 cell; GO:0005737 cytoplasm; GO:0005794 Golgi apparatus; GO:0012505 endomembrane system; GO:0016020 membrane; GO:0031090 organelle membrane; GO:0031984 organelle subcompartment; GO:0043226 organelle; GO:0043227 membrane-bounded organelle; GO:0043229 intracellular organelle; GO:0043231 intracellular membrane-bounded organelle; GO:00985…	GO:0001665 alpha-N-acetylgalactosaminide alpha-2,6-sialyltransferase activity; GO:0003824 catalytic activity; GO:0008373 sialyltransferase activity; GO:0016740 transferase activity; GO:0016757 transferase activity, transferring glycosyl groups;			G	KOG2692	Sialyltransferase
A0A5G2QK18	124	K	0.135	0.00513576	Down	Dipeptidyl peptidase 7 OS=Sus scrofa OX=9823 GN=DPP7 PE=1 SV=1	DPP7	1	0.00889054	93.058	2	YYGK(1)SLPFGER	4.3131	0.209717	0.25807	0.376382	2.51241		1.64342	extracellular	K01276	DPP7; dipeptidyl-peptidase II [EC:3.4.14.2]		GO:0001775 cell activation; GO:0002252 immune effector process; GO:0002263 cell activation involved in immune response; GO:0002274 myeloid leukocyte activation; GO:0002275 myeloid cell activation involved in immune response; GO:0002283 neutrophil activation involved in immune response; GO:0002366 leukocyte activation involved in immune response; GO:0002376 immune system process; GO:0002443 leukoc…	GO:0000323 lytic vacuole; GO:0005576 extracellular region; GO:0005622 intracellular; GO:0005623 cell; GO:0005737 cytoplasm; GO:0005764 lysosome; GO:0005766 primary lysosome; GO:0005773 vacuole; GO:0005775 vacuolar lumen; GO:0005794 Golgi apparatus; GO:0005829 cytosol; GO:0012505 endomembrane system; GO:0030141 secretory granule; GO:0031410 cytoplasmic vesicle; GO:0031974 membrane-enclosed lumen; …	GO:0003824 catalytic activity; GO:0004177 aminopeptidase activity; GO:0008233 peptidase activity; GO:0008236 serine-type peptidase activity; GO:0008238 exopeptidase activity; GO:0008239 dipeptidyl-peptidase activity; GO:0016787 hydrolase activity; GO:0017171 serine hydrolase activity; GO:0070011 peptidase activity, acting on L-amino acid peptides; GO:0140096 catalytic activity, acting on a protei…	PF05577	Serine carboxypeptidase S28	O	KOG2183	Prolylcarboxypeptidase (angiotensinase C)
A0A5G2QW89	277	K	21.902	0.000768138	Up	Calcium uniporter protein OS=Sus scrofa OX=9823 GN=MCU PE=1 SV=1	MCU	1	1.19489e-05	208.6	2	DAIAQAEMDLK(1)R	0.34473	1.4506	1.37067	2.03103		0.0590969	0.0885979	cytoplasm	K20858	MCU; calcium uniporter protein, mitochondrial	map04020 Calcium signaling pathway; map04218 Cellular senescence; map04621 NOD-like receptor signaling pathway	GO:0002791 regulation of peptide secretion; GO:0002793 positive regulation of peptide secretion; GO:0006810 transport; GO:0006811 ion transport; GO:0006812 cation transport; GO:0006816 calcium ion transport; GO:0006839 mitochondrial transport; GO:0006851 mitochondrial calcium ion transmembrane transport; GO:0006873 cellular ion homeostasis; GO:0006874 cellular calcium ion homeostasis; GO:0006875 …	GO:0005622 intracellular; GO:0005623 cell; GO:0005737 cytoplasm; GO:0005739 mitochondrion; GO:0005740 mitochondrial envelope; GO:0005743 mitochondrial inner membrane; GO:0016020 membrane; GO:0016021 integral component of membrane; GO:0019866 organelle inner membrane; GO:0031090 organelle membrane; GO:0031224 intrinsic component of membrane; GO:0031300 intrinsic component of organelle membrane; GO…	GO:0005215 transporter activity; GO:0005216 ion channel activity; GO:0005261 cation channel activity; GO:0005262 calcium channel activity; GO:0005488 binding; GO:0005515 protein binding; GO:0008324 cation transmembrane transporter activity; GO:0015075 ion transmembrane transporter activity; GO:0015085 calcium ion transmembrane transporter activity; GO:0015267 channel activity; GO:0015291 secondar…			S	KOG2966	Uncharacterized conserved protein
A0A286ZPS5	47	K	9.47	0.000204288	Up	Eukaryotic translation initiation factor 5A OS=Sus scrofa OX=9823 GN=EIF5A2 PE=3 SV=1	EIF5A2	1	0.00208104	117.7	2	IVEMSTSK(1)TGK	0.0036977	2.31954	1.50869	1.59873	0.215965	0.152448	0.204632	extracellular	K03263	EIF5A; translation initiation factor 5A							J	KOG3271	Translation initiation factor 5A (eIF-5A)
A0A286ZKB3	315	K	2.397	0.0338492	Up	Tetratricopeptide repeat domain 25 OS=Sus scrofa OX=9823 GN=ODAD4 PE=4 SV=2	ODAD4	1	0.000898763	129.38	2	EYDLPEAK(1)SR	-0.44912	1.47214	1.02961	1.73187	0.898782	0.416315	0.45129	nucleus					GO:0005622 intracellular; GO:0005623 cell; GO:0005737 cytoplasm;				S	KOG1124	FOG: TPR repeat
A0A286ZKB3	172	K	5.443	0.0103216	Up	Tetratricopeptide repeat domain 25 OS=Sus scrofa OX=9823 GN=ODAD4 PE=4 SV=2	ODAD4	1	3.96024e-13	175.86	3	GTIK(1)HGLTVEDLIMTGINYLDTR	-0.2377	1.73159	0.894927	2.44222	0.407421	0.325235	0.198607	nucleus					GO:0005622 intracellular; GO:0005623 cell; GO:0005737 cytoplasm;				S	KOG1124	FOG: TPR repeat
A0A286ZKB3	352	K	8.608	0.0260435	Up	Tetratricopeptide repeat domain 25 OS=Sus scrofa OX=9823 GN=ODAD4 PE=4 SV=2	ODAD4	1	9.05408e-29	287.45	2	TTLEK(1)TWLFHEIGR	-0.45581	0.867975	0.958474	2.81414		0.177121	0.182292	nucleus					GO:0005622 intracellular; GO:0005623 cell; GO:0005737 cytoplasm;				S	KOG1124	FOG: TPR repeat
A0A287A9T4	319	K	2.097	0.0478598	Up	HATPase_c domain-containing protein OS=Sus scrofa OX=9823 GN=HSP90AB1 PE=1 SV=1	HSP90AB1	1	2.61215e-06	112.88	4	SLTNDWEDHLAVK(1)HFSVEGQLEFR	-0.75553	0.964738	1.61139	1.21794	0.698985	0.506949		cytoplasm	K04079	HSP90A, htpG; molecular chaperone HtpG	map04141 Protein processing in endoplasmic reticulum; map04151 PI3K-Akt signaling pathway; map04217 Necroptosis; map04612 Antigen processing and presentation; map04621 NOD-like receptor signaling pathway; map04657 IL-17 signaling pathway; map04659 Th17 cell differentiation; map04914 Progesterone-mediated oocyte maturation; map04915 Estrogen signaling pathway; map05200 Pathways in cancer; map05215…				PF02518	Histidine kinase-, DNA gyrase B-, and HSP90-like ATPase	O	KOG0019	Molecular chaperone (HSP90 family)
A0A5G2QU76	278	K	39.045	0.000389293	Up	Solute carrier family 25 member 13 OS=Sus scrofa OX=9823 GN=SLC25A13 PE=1 SV=1	SLC25A13	1	0.0111873	105.14	2	NSFDCFK(1)K	0.49831	1.44111	1.50402	1.97093		0.0328802	0.0510576	cytoplasm	K15105	SLC25A12_13, AGC; solute carrier family 25 (mitochondrial aspartate/glutamate transporter), member 12/13		GO:0003333 amino acid transmembrane transport; GO:0005975 carbohydrate metabolic process; GO:0005996 monosaccharide metabolic process; GO:0006006 glucose metabolic process; GO:0006091 generation of precursor metabolites and energy; GO:0006094 gluconeogenesis; GO:0006139 nucleobase-containing compound metabolic process; GO:0006163 purine nucleotide metabolic process; GO:0006164 purine nucleotide b…	GO:0005622 intracellular; GO:0005623 cell; GO:0005737 cytoplasm; GO:0005739 mitochondrion; GO:0005740 mitochondrial envelope; GO:0005743 mitochondrial inner membrane; GO:0005886 plasma membrane; GO:0005887 integral component of plasma membrane; GO:0016020 membrane; GO:0016021 integral component of membrane; GO:0019866 organelle inner membrane; GO:0031090 organelle membrane; GO:0031224 intrinsic c…	GO:0005215 transporter activity; GO:0005310 dicarboxylic acid transmembrane transporter activity; GO:0005313 L-glutamate transmembrane transporter activity; GO:0005326 neurotransmitter transmembrane transporter activity; GO:0005342 organic acid transmembrane transporter activity; GO:0005488 binding; GO:0005509 calcium ion binding; GO:0005515 protein binding; GO:0008509 anion transmembrane transpo…			C	KOG0751	Mitochondrial aspartate/glutamate carrier protein Aralar/Citrin (contains EF-hand Ca2+-binding domains)
A0A286ZKG9	165	K	0.106	0.0118713	Down	Peptidyl-prolyl cis-trans isomerase OS=Sus scrofa OX=9823 GN=PPIB PE=1 SV=1	PPIB	1	0.000119911	184.44	3	TAWLDGK(1)HVVFGK	-0.032884	0.225993	0.280763	0.0677145	2.9133	1.40733	1.1049	extracellular	K03768	PPIB, ppiB; peptidyl-prolyl cis-trans isomerase B (cyclophilin B) [EC:5.2.1.8]		GO:0000413 protein peptidyl-prolyl isomerization; GO:0001501 skeletal system development; GO:0006457 protein folding; GO:0006464 cellular protein modification process; GO:0006807 nitrogen compound metabolic process; GO:0006810 transport; GO:0007275 multicellular organism development; GO:0008152 metabolic process; GO:0009987 cellular process; GO:0018193 peptidyl-amino acid modification; GO:0018208…	GO:0005622 intracellular; GO:0005623 cell; GO:0005634 nucleus; GO:0005737 cytoplasm; GO:0005783 endoplasmic reticulum; GO:0005788 endoplasmic reticulum lumen; GO:0005790 smooth endoplasmic reticulum; GO:0012505 endomembrane system; GO:0031974 membrane-enclosed lumen; GO:0032991 protein-containing complex; GO:0034663 endoplasmic reticulum chaperone complex; GO:0043226 organelle; GO:0043227 membran…	GO:0003755 peptidyl-prolyl cis-trans isomerase activity; GO:0003824 catalytic activity; GO:0005488 binding; GO:0005515 protein binding; GO:0008144 drug binding; GO:0016018 cyclosporin A binding; GO:0016853 isomerase activity; GO:0016859 cis-trans isomerase activity; GO:0019899 enzyme binding; GO:0033218 amide binding; GO:0042277 peptide binding; GO:0044877 protein-containing complex binding; GO:0…	PF00160	Cyclophilin type peptidyl-prolyl cis-trans isomerase/CLD	O	KOG0880	Peptidyl-prolyl cis-trans isomerase
A0A286ZKG9	116	K	0.151	0.037262	Down	Peptidyl-prolyl cis-trans isomerase OS=Sus scrofa OX=9823 GN=PPIB PE=1 SV=1	PPIB	1	3.668e-05	191.52	2	GDGTGGK(1)SIYGER	-1.5886	0.374925	0.0834791		1.9185	1.48902	1.13408	extracellular	K03768	PPIB, ppiB; peptidyl-prolyl cis-trans isomerase B (cyclophilin B) [EC:5.2.1.8]		GO:0000413 protein peptidyl-prolyl isomerization; GO:0001501 skeletal system development; GO:0006457 protein folding; GO:0006464 cellular protein modification process; GO:0006807 nitrogen compound metabolic process; GO:0006810 transport; GO:0007275 multicellular organism development; GO:0008152 metabolic process; GO:0009987 cellular process; GO:0018193 peptidyl-amino acid modification; GO:0018208…	GO:0005622 intracellular; GO:0005623 cell; GO:0005634 nucleus; GO:0005737 cytoplasm; GO:0005783 endoplasmic reticulum; GO:0005788 endoplasmic reticulum lumen; GO:0005790 smooth endoplasmic reticulum; GO:0012505 endomembrane system; GO:0031974 membrane-enclosed lumen; GO:0032991 protein-containing complex; GO:0034663 endoplasmic reticulum chaperone complex; GO:0043226 organelle; GO:0043227 membran…	GO:0003755 peptidyl-prolyl cis-trans isomerase activity; GO:0003824 catalytic activity; GO:0005488 binding; GO:0005515 protein binding; GO:0008144 drug binding; GO:0016018 cyclosporin A binding; GO:0016853 isomerase activity; GO:0016859 cis-trans isomerase activity; GO:0019899 enzyme binding; GO:0033218 amide binding; GO:0042277 peptide binding; GO:0044877 protein-containing complex binding; GO:0…	PF00160	Cyclophilin type peptidyl-prolyl cis-trans isomerase/CLD	O	KOG0880	Peptidyl-prolyl cis-trans isomerase
A0A286ZKG9	89	K	0.138	0.00230466	Down	Peptidyl-prolyl cis-trans isomerase OS=Sus scrofa OX=9823 GN=PPIB PE=1 SV=1	PPIB	1	0.0102468	110.14	2	GFGYK(1)NSK	0.035016		0.162799	0.257934	1.7988	1.34876	1.43171	extracellular	K03768	PPIB, ppiB; peptidyl-prolyl cis-trans isomerase B (cyclophilin B) [EC:5.2.1.8]		GO:0000413 protein peptidyl-prolyl isomerization; GO:0001501 skeletal system development; GO:0006457 protein folding; GO:0006464 cellular protein modification process; GO:0006807 nitrogen compound metabolic process; GO:0006810 transport; GO:0007275 multicellular organism development; GO:0008152 metabolic process; GO:0009987 cellular process; GO:0018193 peptidyl-amino acid modification; GO:0018208…	GO:0005622 intracellular; GO:0005623 cell; GO:0005634 nucleus; GO:0005737 cytoplasm; GO:0005783 endoplasmic reticulum; GO:0005788 endoplasmic reticulum lumen; GO:0005790 smooth endoplasmic reticulum; GO:0012505 endomembrane system; GO:0031974 membrane-enclosed lumen; GO:0032991 protein-containing complex; GO:0034663 endoplasmic reticulum chaperone complex; GO:0043226 organelle; GO:0043227 membran…	GO:0003755 peptidyl-prolyl cis-trans isomerase activity; GO:0003824 catalytic activity; GO:0005488 binding; GO:0005515 protein binding; GO:0008144 drug binding; GO:0016018 cyclosporin A binding; GO:0016853 isomerase activity; GO:0016859 cis-trans isomerase activity; GO:0019899 enzyme binding; GO:0033218 amide binding; GO:0042277 peptide binding; GO:0044877 protein-containing complex binding; GO:0…	PF00160	Cyclophilin type peptidyl-prolyl cis-trans isomerase/CLD	O	KOG0880	Peptidyl-prolyl cis-trans isomerase
A0A286ZKG9	171	K	0.133	0.0030665	Down	Peptidyl-prolyl cis-trans isomerase OS=Sus scrofa OX=9823 GN=PPIB PE=1 SV=1	PPIB	1	6.6592e-11	225.23	2	HVVFGK(1)VLEGMEVVR	-0.49446	0.179975	0.27939	0.244265	2.40573	1.93372	0.956915	extracellular	K03768	PPIB, ppiB; peptidyl-prolyl cis-trans isomerase B (cyclophilin B) [EC:5.2.1.8]		GO:0000413 protein peptidyl-prolyl isomerization; GO:0001501 skeletal system development; GO:0006457 protein folding; GO:0006464 cellular protein modification process; GO:0006807 nitrogen compound metabolic process; GO:0006810 transport; GO:0007275 multicellular organism development; GO:0008152 metabolic process; GO:0009987 cellular process; GO:0018193 peptidyl-amino acid modification; GO:0018208…	GO:0005622 intracellular; GO:0005623 cell; GO:0005634 nucleus; GO:0005737 cytoplasm; GO:0005783 endoplasmic reticulum; GO:0005788 endoplasmic reticulum lumen; GO:0005790 smooth endoplasmic reticulum; GO:0012505 endomembrane system; GO:0031974 membrane-enclosed lumen; GO:0032991 protein-containing complex; GO:0034663 endoplasmic reticulum chaperone complex; GO:0043226 organelle; GO:0043227 membran…	GO:0003755 peptidyl-prolyl cis-trans isomerase activity; GO:0003824 catalytic activity; GO:0005488 binding; GO:0005515 protein binding; GO:0008144 drug binding; GO:0016018 cyclosporin A binding; GO:0016853 isomerase activity; GO:0016859 cis-trans isomerase activity; GO:0019899 enzyme binding; GO:0033218 amide binding; GO:0042277 peptide binding; GO:0044877 protein-containing complex binding; GO:0…	PF00160	Cyclophilin type peptidyl-prolyl cis-trans isomerase/CLD	O	KOG0880	Peptidyl-prolyl cis-trans isomerase
A0A286ZKG9	131	K	0.295	0.00409523	Down	Peptidyl-prolyl cis-trans isomerase OS=Sus scrofa OX=9823 GN=PPIB PE=1 SV=1	PPIB	1	1.68302e-40	307.15	3	LK(1)HYGPGWVSMANAGK	-1.2102	0.558943	0.2977	0.511402	1.73137	1.57051	1.33008	extracellular	K03768	PPIB, ppiB; peptidyl-prolyl cis-trans isomerase B (cyclophilin B) [EC:5.2.1.8]		GO:0000413 protein peptidyl-prolyl isomerization; GO:0001501 skeletal system development; GO:0006457 protein folding; GO:0006464 cellular protein modification process; GO:0006807 nitrogen compound metabolic process; GO:0006810 transport; GO:0007275 multicellular organism development; GO:0008152 metabolic process; GO:0009987 cellular process; GO:0018193 peptidyl-amino acid modification; GO:0018208…	GO:0005622 intracellular; GO:0005623 cell; GO:0005634 nucleus; GO:0005737 cytoplasm; GO:0005783 endoplasmic reticulum; GO:0005788 endoplasmic reticulum lumen; GO:0005790 smooth endoplasmic reticulum; GO:0012505 endomembrane system; GO:0031974 membrane-enclosed lumen; GO:0032991 protein-containing complex; GO:0034663 endoplasmic reticulum chaperone complex; GO:0043226 organelle; GO:0043227 membran…	GO:0003755 peptidyl-prolyl cis-trans isomerase activity; GO:0003824 catalytic activity; GO:0005488 binding; GO:0005515 protein binding; GO:0008144 drug binding; GO:0016018 cyclosporin A binding; GO:0016853 isomerase activity; GO:0016859 cis-trans isomerase activity; GO:0019899 enzyme binding; GO:0033218 amide binding; GO:0042277 peptide binding; GO:0044877 protein-containing complex binding; GO:0…	PF00160	Cyclophilin type peptidyl-prolyl cis-trans isomerase/CLD	O	KOG0880	Peptidyl-prolyl cis-trans isomerase
A0A286ZKG9	71	K	0.134	0.00112088	Down	Peptidyl-prolyl cis-trans isomerase OS=Sus scrofa OX=9823 GN=PPIB PE=1 SV=1	PPIB	1	2.13649e-10	175.74	3	TVPK(1)TVDNFVALATGEK	-0.25716	0.271464	0.150669	0.287738	2.04506	1.34822	1.89686	extracellular	K03768	PPIB, ppiB; peptidyl-prolyl cis-trans isomerase B (cyclophilin B) [EC:5.2.1.8]		GO:0000413 protein peptidyl-prolyl isomerization; GO:0001501 skeletal system development; GO:0006457 protein folding; GO:0006464 cellular protein modification process; GO:0006807 nitrogen compound metabolic process; GO:0006810 transport; GO:0007275 multicellular organism development; GO:0008152 metabolic process; GO:0009987 cellular process; GO:0018193 peptidyl-amino acid modification; GO:0018208…	GO:0005622 intracellular; GO:0005623 cell; GO:0005634 nucleus; GO:0005737 cytoplasm; GO:0005783 endoplasmic reticulum; GO:0005788 endoplasmic reticulum lumen; GO:0005790 smooth endoplasmic reticulum; GO:0012505 endomembrane system; GO:0031974 membrane-enclosed lumen; GO:0032991 protein-containing complex; GO:0034663 endoplasmic reticulum chaperone complex; GO:0043226 organelle; GO:0043227 membran…	GO:0003755 peptidyl-prolyl cis-trans isomerase activity; GO:0003824 catalytic activity; GO:0005488 binding; GO:0005515 protein binding; GO:0008144 drug binding; GO:0016018 cyclosporin A binding; GO:0016853 isomerase activity; GO:0016859 cis-trans isomerase activity; GO:0019899 enzyme binding; GO:0033218 amide binding; GO:0042277 peptide binding; GO:0044877 protein-containing complex binding; GO:0…	PF00160	Cyclophilin type peptidyl-prolyl cis-trans isomerase/CLD	O	KOG0880	Peptidyl-prolyl cis-trans isomerase
A0A286ZKG9	67	K	0.092	0.000309864	Down	Peptidyl-prolyl cis-trans isomerase OS=Sus scrofa OX=9823 GN=PPIB PE=1 SV=1	PPIB	1	0.0047341	105.98	2	VVIGLFGK(1)TVPK	0.098715	0.230891	0.124918	0.149845	2.20285	1.67647	1.61503	extracellular	K03768	PPIB, ppiB; peptidyl-prolyl cis-trans isomerase B (cyclophilin B) [EC:5.2.1.8]		GO:0000413 protein peptidyl-prolyl isomerization; GO:0001501 skeletal system development; GO:0006457 protein folding; GO:0006464 cellular protein modification process; GO:0006807 nitrogen compound metabolic process; GO:0006810 transport; GO:0007275 multicellular organism development; GO:0008152 metabolic process; GO:0009987 cellular process; GO:0018193 peptidyl-amino acid modification; GO:0018208…	GO:0005622 intracellular; GO:0005623 cell; GO:0005634 nucleus; GO:0005737 cytoplasm; GO:0005783 endoplasmic reticulum; GO:0005788 endoplasmic reticulum lumen; GO:0005790 smooth endoplasmic reticulum; GO:0012505 endomembrane system; GO:0031974 membrane-enclosed lumen; GO:0032991 protein-containing complex; GO:0034663 endoplasmic reticulum chaperone complex; GO:0043226 organelle; GO:0043227 membran…	GO:0003755 peptidyl-prolyl cis-trans isomerase activity; GO:0003824 catalytic activity; GO:0005488 binding; GO:0005515 protein binding; GO:0008144 drug binding; GO:0016018 cyclosporin A binding; GO:0016853 isomerase activity; GO:0016859 cis-trans isomerase activity; GO:0019899 enzyme binding; GO:0033218 amide binding; GO:0042277 peptide binding; GO:0044877 protein-containing complex binding; GO:0…	PF00160	Cyclophilin type peptidyl-prolyl cis-trans isomerase/CLD	O	KOG0880	Peptidyl-prolyl cis-trans isomerase
F1RT83	178	K	0.452	0.0367777	Down	Syndecan binding protein OS=Sus scrofa OX=9823 GN=SDCBP PE=1 SV=4	SDCBP	1	0.0054058	114.89	2	VLK(1)QAFGEK	0.359	0.89976	0.469698	0.497056	1.76528	1.36334	1.00486	cytoplasm,nucleus	K17254	SDCBP; syntenin-1		GO:0001558 regulation of cell growth; GO:0001775 cell activation; GO:0001932 regulation of protein phosphorylation; GO:0001934 positive regulation of protein phosphorylation; GO:0002090 regulation of receptor internalization; GO:0002091 negative regulation of receptor internalization; GO:0002252 immune effector process; GO:0002263 cell activation involved in immune response; GO:0002274 myeloid le…	GO:0000323 lytic vacuole; GO:0005576 extracellular region; GO:0005615 extracellular space; GO:0005622 intracellular; GO:0005623 cell; GO:0005634 nucleus; GO:0005635 nuclear envelope; GO:0005654 nucleoplasm; GO:0005737 cytoplasm; GO:0005764 lysosome; GO:0005766 primary lysosome; GO:0005773 vacuole; GO:0005775 vacuolar lumen; GO:0005829 cytosol; GO:0005856 cytoskeleton; GO:0005886 plasma membrane; …	GO:0001664 G protein-coupled receptor binding; GO:0005102 signaling receptor binding; GO:0005109 frizzled binding; GO:0005126 cytokine receptor binding; GO:0005137 interleukin-5 receptor binding; GO:0005488 binding; GO:0005515 protein binding; GO:0005543 phospholipid binding; GO:0005546 phosphatidylinositol-4,5-bisphosphate binding; GO:0008022 protein C-terminus binding; GO:0008092 cytoskeletal p…	PF00595	PDZ domain (Also known as DHR or GLGF)	T	KOG0849	Transcription factor PRD and related proteins, contain PAX and HOX domains
A0A286ZYC3	389	K	0.039	1.74477e-05	Down	Beta-hexosaminidase OS=Sus scrofa OX=9823 GN=HEXB PE=1 SV=1	HEXB	1	3.97874e-09	232.17	2	IEDYK(1)WEQSLITK	0.37929	0.0797731	0.0608206	0.0828371	1.8531	1.65185	2.27162	extracellular	K12373	HEXA_B; hexosaminidase [EC:3.2.1.52]	map00511 Other glycan degradation; map00513 Various types of N-glycan biosynthesis; map00520 Amino sugar and nucleotide sugar metabolism; map00531 Glycosaminoglycan degradation; map00603 Glycosphingolipid biosynthesis - globo and isoglobo series; map00604 Glycosphingolipid biosynthesis - ganglio series; map01100 Metabolic pathways; map04142 Lysosome	GO:0000003 reproduction; GO:0001501 skeletal system development; GO:0001573 ganglioside metabolic process; GO:0001775 cell activation; GO:0002252 immune effector process; GO:0002263 cell activation involved in immune response; GO:0002274 myeloid leukocyte activation; GO:0002275 myeloid cell activation involved in immune response; GO:0002283 neutrophil activation involved in immune response; GO:00…	GO:0000323 lytic vacuole; GO:0001669 acrosomal vesicle; GO:0005576 extracellular region; GO:0005615 extracellular space; GO:0005622 intracellular; GO:0005623 cell; GO:0005737 cytoplasm; GO:0005764 lysosome; GO:0005766 primary lysosome; GO:0005773 vacuole; GO:0005775 vacuolar lumen; GO:0012505 endomembrane system; GO:0016020 membrane; GO:0030141 secretory granule; GO:0031410 cytoplasmic vesicle; G…	GO:0003824 catalytic activity; GO:0004553 hydrolase activity, hydrolyzing O-glycosyl compounds; GO:0004563 beta-N-acetylhexosaminidase activity; GO:0005488 binding; GO:0005515 protein binding; GO:0008194 UDP-glycosyltransferase activity; GO:0008375 acetylglucosaminyltransferase activity; GO:0015929 hexosaminidase activity; GO:0016231 beta-N-acetylglucosaminidase activity; GO:0016740 transferase a…	PF00728	Glycosyl hydrolase family 20, catalytic domain	G	KOG2499	Beta-N-acetylhexosaminidase
A0A286ZYC3	262	K	0.046	0.00102177	Down	Beta-hexosaminidase OS=Sus scrofa OX=9823 GN=HEXB PE=1 SV=1	HEXB	1	3.04349e-09	238.51	2	GQK(1)DLLTPCYR	0.24037	0.0708271		0.0783664	2.10804	1.61601	1.12676	extracellular	K12373	HEXA_B; hexosaminidase [EC:3.2.1.52]	map00511 Other glycan degradation; map00513 Various types of N-glycan biosynthesis; map00520 Amino sugar and nucleotide sugar metabolism; map00531 Glycosaminoglycan degradation; map00603 Glycosphingolipid biosynthesis - globo and isoglobo series; map00604 Glycosphingolipid biosynthesis - ganglio series; map01100 Metabolic pathways; map04142 Lysosome	GO:0000003 reproduction; GO:0001501 skeletal system development; GO:0001573 ganglioside metabolic process; GO:0001775 cell activation; GO:0002252 immune effector process; GO:0002263 cell activation involved in immune response; GO:0002274 myeloid leukocyte activation; GO:0002275 myeloid cell activation involved in immune response; GO:0002283 neutrophil activation involved in immune response; GO:00…	GO:0000323 lytic vacuole; GO:0001669 acrosomal vesicle; GO:0005576 extracellular region; GO:0005615 extracellular space; GO:0005622 intracellular; GO:0005623 cell; GO:0005737 cytoplasm; GO:0005764 lysosome; GO:0005766 primary lysosome; GO:0005773 vacuole; GO:0005775 vacuolar lumen; GO:0012505 endomembrane system; GO:0016020 membrane; GO:0030141 secretory granule; GO:0031410 cytoplasmic vesicle; G…	GO:0003824 catalytic activity; GO:0004553 hydrolase activity, hydrolyzing O-glycosyl compounds; GO:0004563 beta-N-acetylhexosaminidase activity; GO:0005488 binding; GO:0005515 protein binding; GO:0008194 UDP-glycosyltransferase activity; GO:0008375 acetylglucosaminyltransferase activity; GO:0015929 hexosaminidase activity; GO:0016231 beta-N-acetylglucosaminidase activity; GO:0016740 transferase a…	PF00728	Glycosyl hydrolase family 20, catalytic domain	G	KOG2499	Beta-N-acetylhexosaminidase
A0A286ZYC3	176	K	0.031	0.000622767	Down	Beta-hexosaminidase OS=Sus scrofa OX=9823 GN=HEXB PE=1 SV=1	HEXB	1	3.12451e-08	221.68	3	HFLSVK(1)TIFK	-0.71274	0.096388	0.0276573	0.058085	2.12565	1.97539	1.71682	extracellular	K12373	HEXA_B; hexosaminidase [EC:3.2.1.52]	map00511 Other glycan degradation; map00513 Various types of N-glycan biosynthesis; map00520 Amino sugar and nucleotide sugar metabolism; map00531 Glycosaminoglycan degradation; map00603 Glycosphingolipid biosynthesis - globo and isoglobo series; map00604 Glycosphingolipid biosynthesis - ganglio series; map01100 Metabolic pathways; map04142 Lysosome	GO:0000003 reproduction; GO:0001501 skeletal system development; GO:0001573 ganglioside metabolic process; GO:0001775 cell activation; GO:0002252 immune effector process; GO:0002263 cell activation involved in immune response; GO:0002274 myeloid leukocyte activation; GO:0002275 myeloid cell activation involved in immune response; GO:0002283 neutrophil activation involved in immune response; GO:00…	GO:0000323 lytic vacuole; GO:0001669 acrosomal vesicle; GO:0005576 extracellular region; GO:0005615 extracellular space; GO:0005622 intracellular; GO:0005623 cell; GO:0005737 cytoplasm; GO:0005764 lysosome; GO:0005766 primary lysosome; GO:0005773 vacuole; GO:0005775 vacuolar lumen; GO:0012505 endomembrane system; GO:0016020 membrane; GO:0030141 secretory granule; GO:0031410 cytoplasmic vesicle; G…	GO:0003824 catalytic activity; GO:0004553 hydrolase activity, hydrolyzing O-glycosyl compounds; GO:0004563 beta-N-acetylhexosaminidase activity; GO:0005488 binding; GO:0005515 protein binding; GO:0008194 UDP-glycosyltransferase activity; GO:0008375 acetylglucosaminyltransferase activity; GO:0015929 hexosaminidase activity; GO:0016231 beta-N-acetylglucosaminidase activity; GO:0016740 transferase a…	PF00728	Glycosyl hydrolase family 20, catalytic domain	G	KOG2499	Beta-N-acetylhexosaminidase
A0A286ZYC3	180	K	0.061	0.00123956	Down	Beta-hexosaminidase OS=Sus scrofa OX=9823 GN=HEXB PE=1 SV=1	HEXB	1	6.01899e-06	209.21	2	TIFK(1)TLDAMAFNK	-1.3537	0.124863		0.0694174	1.54294	1.44211	1.82067	extracellular	K12373	HEXA_B; hexosaminidase [EC:3.2.1.52]	map00511 Other glycan degradation; map00513 Various types of N-glycan biosynthesis; map00520 Amino sugar and nucleotide sugar metabolism; map00531 Glycosaminoglycan degradation; map00603 Glycosphingolipid biosynthesis - globo and isoglobo series; map00604 Glycosphingolipid biosynthesis - ganglio series; map01100 Metabolic pathways; map04142 Lysosome	GO:0000003 reproduction; GO:0001501 skeletal system development; GO:0001573 ganglioside metabolic process; GO:0001775 cell activation; GO:0002252 immune effector process; GO:0002263 cell activation involved in immune response; GO:0002274 myeloid leukocyte activation; GO:0002275 myeloid cell activation involved in immune response; GO:0002283 neutrophil activation involved in immune response; GO:00…	GO:0000323 lytic vacuole; GO:0001669 acrosomal vesicle; GO:0005576 extracellular region; GO:0005615 extracellular space; GO:0005622 intracellular; GO:0005623 cell; GO:0005737 cytoplasm; GO:0005764 lysosome; GO:0005766 primary lysosome; GO:0005773 vacuole; GO:0005775 vacuolar lumen; GO:0012505 endomembrane system; GO:0016020 membrane; GO:0030141 secretory granule; GO:0031410 cytoplasmic vesicle; G…	GO:0003824 catalytic activity; GO:0004553 hydrolase activity, hydrolyzing O-glycosyl compounds; GO:0004563 beta-N-acetylhexosaminidase activity; GO:0005488 binding; GO:0005515 protein binding; GO:0008194 UDP-glycosyltransferase activity; GO:0008375 acetylglucosaminyltransferase activity; GO:0015929 hexosaminidase activity; GO:0016231 beta-N-acetylglucosaminidase activity; GO:0016740 transferase a…	PF00728	Glycosyl hydrolase family 20, catalytic domain	G	KOG2499	Beta-N-acetylhexosaminidase
A0A286ZKX2	300	K	11.202	0.0055965	Up	Citrate synthase OS=Sus scrofa OX=9823 GN=CS PE=1 SV=2	CS	1	1.73459e-28	278.46	3	EFALK(1)HLPHDPMFK(1)LVAQLYK	-1.0265	1.42984	1.06203	2.22729	0.17496	0.105883		cytoplasm	K01647	CS, gltA; citrate synthase [EC:2.3.3.1]	map00020 Citrate cycle (TCA cycle); map00630 Glyoxylate and dicarboxylate metabolism; map01100 Metabolic pathways; map01200 Carbon metabolism; map01210 2-Oxocarboxylic acid metabolism; map01230 Biosynthesis of amino acids	GO:0005975 carbohydrate metabolic process; GO:0008152 metabolic process; GO:0044238 primary metabolic process; GO:0071704 organic substance metabolic process;	GO:0005622 intracellular; GO:0005623 cell; GO:0005737 cytoplasm; GO:0005739 mitochondrion; GO:0005759 mitochondrial matrix; GO:0031974 membrane-enclosed lumen; GO:0043226 organelle; GO:0043227 membrane-bounded organelle; GO:0043229 intracellular organelle; GO:0043231 intracellular membrane-bounded organelle; GO:0043233 organelle lumen; GO:0070013 intracellular organelle lumen;	GO:0003824 catalytic activity; GO:0004108 citrate (Si)-synthase activity; GO:0016740 transferase activity; GO:0016746 transferase activity, transferring acyl groups; GO:0036440 citrate synthase activity; GO:0046912 transferase activity, transferring acyl groups, acyl groups converted into alkyl on transfer;	PF00285	Citrate synthase	C	KOG2617	Citrate synthase
A0A286ZKX2	261	K	6.967	0.00107078	Up	Citrate synthase OS=Sus scrofa OX=9823 GN=CS PE=1 SV=2	CS	1	0.000435385	180.19	2	EVGK(1)DVSDEK(1)LR	0.024181	1.6625	1.21279	1.68807		0.199637	0.237013	cytoplasm	K01647	CS, gltA; citrate synthase [EC:2.3.3.1]	map00020 Citrate cycle (TCA cycle); map00630 Glyoxylate and dicarboxylate metabolism; map01100 Metabolic pathways; map01200 Carbon metabolism; map01210 2-Oxocarboxylic acid metabolism; map01230 Biosynthesis of amino acids	GO:0005975 carbohydrate metabolic process; GO:0008152 metabolic process; GO:0044238 primary metabolic process; GO:0071704 organic substance metabolic process;	GO:0005622 intracellular; GO:0005623 cell; GO:0005737 cytoplasm; GO:0005739 mitochondrion; GO:0005759 mitochondrial matrix; GO:0031974 membrane-enclosed lumen; GO:0043226 organelle; GO:0043227 membrane-bounded organelle; GO:0043229 intracellular organelle; GO:0043231 intracellular membrane-bounded organelle; GO:0043233 organelle lumen; GO:0070013 intracellular organelle lumen;	GO:0003824 catalytic activity; GO:0004108 citrate (Si)-synthase activity; GO:0016740 transferase activity; GO:0016746 transferase activity, transferring acyl groups; GO:0036440 citrate synthase activity; GO:0046912 transferase activity, transferring acyl groups, acyl groups converted into alkyl on transfer;	PF00285	Citrate synthase	C	KOG2617	Citrate synthase
A0A286ZKX2	10	K	3.416	0.0103028	Up	Citrate synthase OS=Sus scrofa OX=9823 GN=CS PE=1 SV=2	CS	1	2.35703e-44	311.16	3	GMK(1)GLVYETSVLDPDEGIR	-0.175	1.84707	0.987122	1.80725	0.605377	0.415618	0.337565	cytoplasm	K01647	CS, gltA; citrate synthase [EC:2.3.3.1]	map00020 Citrate cycle (TCA cycle); map00630 Glyoxylate and dicarboxylate metabolism; map01100 Metabolic pathways; map01200 Carbon metabolism; map01210 2-Oxocarboxylic acid metabolism; map01230 Biosynthesis of amino acids	GO:0005975 carbohydrate metabolic process; GO:0008152 metabolic process; GO:0044238 primary metabolic process; GO:0071704 organic substance metabolic process;	GO:0005622 intracellular; GO:0005623 cell; GO:0005737 cytoplasm; GO:0005739 mitochondrion; GO:0005759 mitochondrial matrix; GO:0031974 membrane-enclosed lumen; GO:0043226 organelle; GO:0043227 membrane-bounded organelle; GO:0043229 intracellular organelle; GO:0043231 intracellular membrane-bounded organelle; GO:0043233 organelle lumen; GO:0070013 intracellular organelle lumen;	GO:0003824 catalytic activity; GO:0004108 citrate (Si)-synthase activity; GO:0016740 transferase activity; GO:0016746 transferase activity, transferring acyl groups; GO:0036440 citrate synthase activity; GO:0046912 transferase activity, transferring acyl groups, acyl groups converted into alkyl on transfer;	PF00285	Citrate synthase	C	KOG2617	Citrate synthase
A0A286ZKX2	149	K	15.578	0.00305084	Up	Citrate synthase OS=Sus scrofa OX=9823 GN=CS PE=1 SV=2	CS	1	0.000178216	176.41	2	LPCVAAK(1)IYR	-1.1435	1.45216	1.36474	1.97791	0.139435	0.0657563		cytoplasm	K01647	CS, gltA; citrate synthase [EC:2.3.3.1]	map00020 Citrate cycle (TCA cycle); map00630 Glyoxylate and dicarboxylate metabolism; map01100 Metabolic pathways; map01200 Carbon metabolism; map01210 2-Oxocarboxylic acid metabolism; map01230 Biosynthesis of amino acids	GO:0005975 carbohydrate metabolic process; GO:0008152 metabolic process; GO:0044238 primary metabolic process; GO:0071704 organic substance metabolic process;	GO:0005622 intracellular; GO:0005623 cell; GO:0005737 cytoplasm; GO:0005739 mitochondrion; GO:0005759 mitochondrial matrix; GO:0031974 membrane-enclosed lumen; GO:0043226 organelle; GO:0043227 membrane-bounded organelle; GO:0043229 intracellular organelle; GO:0043231 intracellular membrane-bounded organelle; GO:0043233 organelle lumen; GO:0070013 intracellular organelle lumen;	GO:0003824 catalytic activity; GO:0004108 citrate (Si)-synthase activity; GO:0016740 transferase activity; GO:0016746 transferase activity, transferring acyl groups; GO:0036440 citrate synthase activity; GO:0046912 transferase activity, transferring acyl groups, acyl groups converted into alkyl on transfer;	PF00285	Citrate synthase	C	KOG2617	Citrate synthase
A0A286ZKX2	384	K	20.521	0.000906857	Up	Citrate synthase OS=Sus scrofa OX=9823 GN=CS PE=1 SV=2	CS	1	0.000201952	199.03	2	PK(1)SMSTDGLIK	-0.20974	1.44115	1.61269	1.78883	0.100677	0.0566491		cytoplasm	K01647	CS, gltA; citrate synthase [EC:2.3.3.1]	map00020 Citrate cycle (TCA cycle); map00630 Glyoxylate and dicarboxylate metabolism; map01100 Metabolic pathways; map01200 Carbon metabolism; map01210 2-Oxocarboxylic acid metabolism; map01230 Biosynthesis of amino acids	GO:0005975 carbohydrate metabolic process; GO:0008152 metabolic process; GO:0044238 primary metabolic process; GO:0071704 organic substance metabolic process;	GO:0005622 intracellular; GO:0005623 cell; GO:0005737 cytoplasm; GO:0005739 mitochondrion; GO:0005759 mitochondrial matrix; GO:0031974 membrane-enclosed lumen; GO:0043226 organelle; GO:0043227 membrane-bounded organelle; GO:0043229 intracellular organelle; GO:0043231 intracellular membrane-bounded organelle; GO:0043233 organelle lumen; GO:0070013 intracellular organelle lumen;	GO:0003824 catalytic activity; GO:0004108 citrate (Si)-synthase activity; GO:0016740 transferase activity; GO:0016746 transferase activity, transferring acyl groups; GO:0036440 citrate synthase activity; GO:0046912 transferase activity, transferring acyl groups, acyl groups converted into alkyl on transfer;	PF00285	Citrate synthase	C	KOG2617	Citrate synthase
A0A287ADK3	409	K	17.969	0.0215392	Up	Aldehyde dehydrogenase (NAD(+)) OS=Sus scrofa OX=9823 GN=ALDH7A1 PE=1 SV=1	ALDH7A1	1	5.53261e-40	301.93	3	FK(1)NEDEVFAWNNEVK	-0.20014	1.56962	0.998956	2.25255	0.152374	0.0264957		mitochondria	K14085	ALDH7A1; aldehyde dehydrogenase family 7 member A1 [EC:1.2.1.31 1.2.1.8 1.2.1.3]	map00010 Glycolysis / Gluconeogenesis; map00053 Ascorbate and aldarate metabolism; map00071 Fatty acid degradation; map00260 Glycine, serine and threonine metabolism; map00280 Valine, leucine and isoleucine degradation; map00310 Lysine degradation; map00330 Arginine and proline metabolism; map00340 Histidine metabolism; map00380 Tryptophan metabolism; map00410 beta-Alanine metabolism; map00561 Gl…	GO:0001505 regulation of neurotransmitter levels; GO:0003008 system process; GO:0006081 cellular aldehyde metabolic process; GO:0006082 organic acid metabolic process; GO:0006520 cellular amino acid metabolic process; GO:0006553 lysine metabolic process; GO:0006554 lysine catabolic process; GO:0006576 cellular biogenic amine metabolic process; GO:0006807 nitrogen compound metabolic process; GO:00…	GO:0005622 intracellular; GO:0005623 cell; GO:0005737 cytoplasm; GO:0005739 mitochondrion; GO:0005759 mitochondrial matrix; GO:0005829 cytosol; GO:0031974 membrane-enclosed lumen; GO:0043226 organelle; GO:0043227 membrane-bounded organelle; GO:0043229 intracellular organelle; GO:0043231 intracellular membrane-bounded organelle; GO:0043233 organelle lumen; GO:0070013 intracellular organelle lumen;	GO:0003824 catalytic activity; GO:0004029 aldehyde dehydrogenase (NAD+) activity; GO:0004043 L-aminoadipate-semialdehyde dehydrogenase activity; GO:0008802 betaine-aldehyde dehydrogenase activity; GO:0016491 oxidoreductase activity; GO:0016620 oxidoreductase activity, acting on the aldehyde or oxo group of donors, NAD or NADP as acceptor; GO:0016903 oxidoreductase activity, acting on the aldehyde…			C	KOG2453	Aldehyde dehydrogenase
A0A287ADK3	322	K	11.332	0.000279857	Up	Aldehyde dehydrogenase (NAD(+)) OS=Sus scrofa OX=9823 GN=ALDH7A1 PE=1 SV=1	ALDH7A1	1	0.00984518	102.95	2	LTK(1)AYAQIR	-0.33877	1.5294	2.12202	1.86203	0.224637	0.125655	0.136265	mitochondria	K14085	ALDH7A1; aldehyde dehydrogenase family 7 member A1 [EC:1.2.1.31 1.2.1.8 1.2.1.3]	map00010 Glycolysis / Gluconeogenesis; map00053 Ascorbate and aldarate metabolism; map00071 Fatty acid degradation; map00260 Glycine, serine and threonine metabolism; map00280 Valine, leucine and isoleucine degradation; map00310 Lysine degradation; map00330 Arginine and proline metabolism; map00340 Histidine metabolism; map00380 Tryptophan metabolism; map00410 beta-Alanine metabolism; map00561 Gl…	GO:0001505 regulation of neurotransmitter levels; GO:0003008 system process; GO:0006081 cellular aldehyde metabolic process; GO:0006082 organic acid metabolic process; GO:0006520 cellular amino acid metabolic process; GO:0006553 lysine metabolic process; GO:0006554 lysine catabolic process; GO:0006576 cellular biogenic amine metabolic process; GO:0006807 nitrogen compound metabolic process; GO:00…	GO:0005622 intracellular; GO:0005623 cell; GO:0005737 cytoplasm; GO:0005739 mitochondrion; GO:0005759 mitochondrial matrix; GO:0005829 cytosol; GO:0031974 membrane-enclosed lumen; GO:0043226 organelle; GO:0043227 membrane-bounded organelle; GO:0043229 intracellular organelle; GO:0043231 intracellular membrane-bounded organelle; GO:0043233 organelle lumen; GO:0070013 intracellular organelle lumen;	GO:0003824 catalytic activity; GO:0004029 aldehyde dehydrogenase (NAD+) activity; GO:0004043 L-aminoadipate-semialdehyde dehydrogenase activity; GO:0008802 betaine-aldehyde dehydrogenase activity; GO:0016491 oxidoreductase activity; GO:0016620 oxidoreductase activity, acting on the aldehyde or oxo group of donors, NAD or NADP as acceptor; GO:0016903 oxidoreductase activity, acting on the aldehyde…			C	KOG2453	Aldehyde dehydrogenase
F1SN58	155	K	3.945	0.00064788	Up	Sulfide:quinone oxidoreductase, mitochondrial OS=Sus scrofa OX=9823 GN=SQOR PE=1 SV=3	SQOR	1	0.00106292	127.51	2	IK(1)GLPEGFDHPK	-0.13899	1.7083	1.60504	1.47339	0.521585	0.337705	0.35398	mitochondria	K22470	SQOR; eukaryotic sulfide quinone oxidoreductase [EC:1.8.5.8]	map00920 Sulfur metabolism; map01100 Metabolic pathways	GO:0006790 sulfur compound metabolic process; GO:0008152 metabolic process; GO:0009404 toxin metabolic process; GO:0009987 cellular process; GO:0017144 drug metabolic process; GO:0019418 sulfide oxidation; GO:0019748 secondary metabolic process; GO:0044237 cellular metabolic process; GO:0055114 oxidation-reduction process; GO:0070221 sulfide oxidation, using sulfide:quinone oxidoreductase; GO:007…		GO:0003824 catalytic activity; GO:0016491 oxidoreductase activity; GO:0016667 oxidoreductase activity, acting on a sulfur group of donors; GO:0016672 oxidoreductase activity, acting on a sulfur group of donors, quinone or similar compound as acceptor; GO:0070224 sulfide:quinone oxidoreductase activity;	PF07992	Pyridine nucleotide-disulphide oxidoreductase	C	KOG3851	Sulfide:quinone oxidoreductase/flavo-binding protein
F1SN58	372	K	7.077	0.00770019	Up	Sulfide:quinone oxidoreductase, mitochondrial OS=Sus scrofa OX=9823 GN=SQOR PE=1 SV=3	SQOR	1	4.87606e-97	375.97	2	K(1)YDGYTSCPLVTGYNR	-0.17209	1.18387	2.08105	1.30464	0.273857		0.156583	mitochondria	K22470	SQOR; eukaryotic sulfide quinone oxidoreductase [EC:1.8.5.8]	map00920 Sulfur metabolism; map01100 Metabolic pathways	GO:0006790 sulfur compound metabolic process; GO:0008152 metabolic process; GO:0009404 toxin metabolic process; GO:0009987 cellular process; GO:0017144 drug metabolic process; GO:0019418 sulfide oxidation; GO:0019748 secondary metabolic process; GO:0044237 cellular metabolic process; GO:0055114 oxidation-reduction process; GO:0070221 sulfide oxidation, using sulfide:quinone oxidoreductase; GO:007…		GO:0003824 catalytic activity; GO:0016491 oxidoreductase activity; GO:0016667 oxidoreductase activity, acting on a sulfur group of donors; GO:0016672 oxidoreductase activity, acting on a sulfur group of donors, quinone or similar compound as acceptor; GO:0070224 sulfide:quinone oxidoreductase activity;	PF07992	Pyridine nucleotide-disulphide oxidoreductase	C	KOG3851	Sulfide:quinone oxidoreductase/flavo-binding protein
F1SN58	134	K	4.395	0.00304745	Up	Sulfide:quinone oxidoreductase, mitochondrial OS=Sus scrofa OX=9823 GN=SQOR PE=1 SV=3	SQOR	1	2.87511e-05	138.73	3	NCIHTDNGK(1)EISYR	-0.41462	1.98367	1.75247	1.15175	0.413776	0.436406	0.261927	mitochondria	K22470	SQOR; eukaryotic sulfide quinone oxidoreductase [EC:1.8.5.8]	map00920 Sulfur metabolism; map01100 Metabolic pathways	GO:0006790 sulfur compound metabolic process; GO:0008152 metabolic process; GO:0009404 toxin metabolic process; GO:0009987 cellular process; GO:0017144 drug metabolic process; GO:0019418 sulfide oxidation; GO:0019748 secondary metabolic process; GO:0044237 cellular metabolic process; GO:0055114 oxidation-reduction process; GO:0070221 sulfide oxidation, using sulfide:quinone oxidoreductase; GO:007…		GO:0003824 catalytic activity; GO:0016491 oxidoreductase activity; GO:0016667 oxidoreductase activity, acting on a sulfur group of donors; GO:0016672 oxidoreductase activity, acting on a sulfur group of donors, quinone or similar compound as acceptor; GO:0070224 sulfide:quinone oxidoreductase activity;	PF07992	Pyridine nucleotide-disulphide oxidoreductase	C	KOG3851	Sulfide:quinone oxidoreductase/flavo-binding protein
F1SN58	260	K	27.636	0.000183506	Up	Sulfide:quinone oxidoreductase, mitochondrial OS=Sus scrofa OX=9823 GN=SQOR PE=1 SV=3	SQOR	1	1.38878e-38	305.06	3	NLTINYK(1)QNLIEVR	0.15766	2.18884	1.64166	1.95997	0.105854	0.0535131	0.0501616	mitochondria	K22470	SQOR; eukaryotic sulfide quinone oxidoreductase [EC:1.8.5.8]	map00920 Sulfur metabolism; map01100 Metabolic pathways	GO:0006790 sulfur compound metabolic process; GO:0008152 metabolic process; GO:0009404 toxin metabolic process; GO:0009987 cellular process; GO:0017144 drug metabolic process; GO:0019418 sulfide oxidation; GO:0019748 secondary metabolic process; GO:0044237 cellular metabolic process; GO:0055114 oxidation-reduction process; GO:0070221 sulfide oxidation, using sulfide:quinone oxidoreductase; GO:007…		GO:0003824 catalytic activity; GO:0016491 oxidoreductase activity; GO:0016667 oxidoreductase activity, acting on a sulfur group of donors; GO:0016672 oxidoreductase activity, acting on a sulfur group of donors, quinone or similar compound as acceptor; GO:0070224 sulfide:quinone oxidoreductase activity;	PF07992	Pyridine nucleotide-disulphide oxidoreductase	C	KOG3851	Sulfide:quinone oxidoreductase/flavo-binding protein
F1SN58	224	K	43.407	0.00105467	Up	Sulfide:quinone oxidoreductase, mitochondrial OS=Sus scrofa OX=9823 GN=SQOR PE=1 SV=3	SQOR	1	1.028e-33	281.94	3	SK(1)ANIIFNTSLGAIFGVK	-0.086737	1.62504	1.66175	2.57809	0.0873697	0.0268029	0.0209423	mitochondria	K22470	SQOR; eukaryotic sulfide quinone oxidoreductase [EC:1.8.5.8]	map00920 Sulfur metabolism; map01100 Metabolic pathways	GO:0006790 sulfur compound metabolic process; GO:0008152 metabolic process; GO:0009404 toxin metabolic process; GO:0009987 cellular process; GO:0017144 drug metabolic process; GO:0019418 sulfide oxidation; GO:0019748 secondary metabolic process; GO:0044237 cellular metabolic process; GO:0055114 oxidation-reduction process; GO:0070221 sulfide oxidation, using sulfide:quinone oxidoreductase; GO:007…		GO:0003824 catalytic activity; GO:0016491 oxidoreductase activity; GO:0016667 oxidoreductase activity, acting on a sulfur group of donors; GO:0016672 oxidoreductase activity, acting on a sulfur group of donors, quinone or similar compound as acceptor; GO:0070224 sulfide:quinone oxidoreductase activity;	PF07992	Pyridine nucleotide-disulphide oxidoreductase	C	KOG3851	Sulfide:quinone oxidoreductase/flavo-binding protein
F1SN58	365	K	26.393	0.000518244	Up	Sulfide:quinone oxidoreductase, mitochondrial OS=Sus scrofa OX=9823 GN=SQOR PE=1 SV=3	SQOR	1	3.1045e-09	233.84	2	TISLIMK(1)NQTPTK	-0.20359	1.80138	1.18562	1.88981		0.0669401	0.0562462	mitochondria	K22470	SQOR; eukaryotic sulfide quinone oxidoreductase [EC:1.8.5.8]	map00920 Sulfur metabolism; map01100 Metabolic pathways	GO:0006790 sulfur compound metabolic process; GO:0008152 metabolic process; GO:0009404 toxin metabolic process; GO:0009987 cellular process; GO:0017144 drug metabolic process; GO:0019418 sulfide oxidation; GO:0019748 secondary metabolic process; GO:0044237 cellular metabolic process; GO:0055114 oxidation-reduction process; GO:0070221 sulfide oxidation, using sulfide:quinone oxidoreductase; GO:007…		GO:0003824 catalytic activity; GO:0016491 oxidoreductase activity; GO:0016667 oxidoreductase activity, acting on a sulfur group of donors; GO:0016672 oxidoreductase activity, acting on a sulfur group of donors, quinone or similar compound as acceptor; GO:0070224 sulfide:quinone oxidoreductase activity;	PF07992	Pyridine nucleotide-disulphide oxidoreductase	C	KOG3851	Sulfide:quinone oxidoreductase/flavo-binding protein
A0A286ZLJ0	229	K	46.186	0.000242687	Up	LETM1 domain containing 1 OS=Sus scrofa OX=9823 GN=LETMD1 PE=4 SV=1	LETMD1	1	8.22606e-06	205.02	4	GTHPSK(1)HDILALR	-0.81265	1.535	1.44627	1.94759	0.0422932	0.0288518		mitochondria				GO:0006873 cellular ion homeostasis; GO:0006875 cellular metal ion homeostasis; GO:0009987 cellular process; GO:0019725 cellular homeostasis; GO:0030003 cellular cation homeostasis; GO:0042592 homeostatic process; GO:0048878 chemical homeostasis; GO:0050801 ion homeostasis; GO:0055065 metal ion homeostasis; GO:0055080 cation homeostasis; GO:0055082 cellular chemical homeostasis; GO:0065007 biolog…	GO:0005622 intracellular; GO:0005623 cell; GO:0005634 nucleus; GO:0005654 nucleoplasm; GO:0005737 cytoplasm; GO:0005739 mitochondrion; GO:0005740 mitochondrial envelope; GO:0005743 mitochondrial inner membrane; GO:0016020 membrane; GO:0019866 organelle inner membrane; GO:0031090 organelle membrane; GO:0031966 mitochondrial membrane; GO:0031967 organelle envelope; GO:0031974 membrane-enclosed lume…				T	KOG4263	Putative receptor CCR1
A0A5G2QJQ9	165	K	25.265	0.00102013	Up	Clathrin light chain OS=Sus scrofa OX=9823 GN=CLTA PE=3 SV=1	CLTA	1	0.000680699	133.13	2	LCDFNPK(1)SSK	0.28728	1.6496	1.77057	2.35138	0.13907	0.045033	0.0443408	cytoplasm	K04644	CLTA, LCA; clathrin light chain A	map04142 Lysosome; map04144 Endocytosis; map04721 Synaptic vesicle cycle; map04961 Endocrine and other factor-regulated calcium reabsorption; map05016 Huntington disease; map05100 Bacterial invasion of epithelial cells	GO:0002376 immune system process; GO:0002478 antigen processing and presentation of exogenous peptide antigen; GO:0002495 antigen processing and presentation of peptide antigen via MHC class II; GO:0002504 antigen processing and presentation of peptide or polysaccharide antigen via MHC class II; GO:0006807 nitrogen compound metabolic process; GO:0006810 transport; GO:0006897 endocytosis; GO:00068…	GO:0000139 Golgi membrane; GO:0000323 lytic vacuole; GO:0005622 intracellular; GO:0005623 cell; GO:0005737 cytoplasm; GO:0005764 lysosome; GO:0005765 lysosomal membrane; GO:0005768 endosome; GO:0005773 vacuole; GO:0005774 vacuolar membrane; GO:0005794 Golgi apparatus; GO:0005802 trans-Golgi network; GO:0005829 cytosol; GO:0005886 plasma membrane; GO:0005905 clathrin-coated pit; GO:0005938 cell co…	GO:0005198 structural molecule activity; GO:0005488 binding; GO:0005515 protein binding; GO:0019899 enzyme binding; GO:0030276 clathrin binding; GO:0032050 clathrin heavy chain binding; GO:0033218 amide binding; GO:0042277 peptide binding; GO:0044877 protein-containing complex binding; GO:0051020 GTPase binding;			U	KOG4031	Vesicle coat protein clathrin, light chain
A0A286ZM06	202	K	16.205	1.25635e-05	Up	Choline dehydrogenase OS=Sus scrofa OX=9823 GN=CHDH PE=1 SV=1	CHDH	1	1.93881e-20	270.56	2	AVGVEYIK(1)NGQSHR	0.39173	1.77592	1.91499	1.96036	0.139409	0.110991	0.0983314	mitochondria	K00108	betA, CHDH; choline dehydrogenase [EC:1.1.99.1]	map00260 Glycine, serine and threonine metabolism; map01100 Metabolic pathways	GO:0001505 regulation of neurotransmitter levels; GO:0006576 cellular biogenic amine metabolic process; GO:0006807 nitrogen compound metabolic process; GO:0008152 metabolic process; GO:0009056 catabolic process; GO:0009308 amine metabolic process; GO:0009310 amine catabolic process; GO:0009987 cellular process; GO:0019695 choline metabolic process; GO:0034641 cellular nitrogen compound metabolic …	GO:0005622 intracellular; GO:0005623 cell; GO:0005737 cytoplasm; GO:0005739 mitochondrion; GO:0005740 mitochondrial envelope; GO:0005743 mitochondrial inner membrane; GO:0016020 membrane; GO:0019866 organelle inner membrane; GO:0031090 organelle membrane; GO:0031966 mitochondrial membrane; GO:0031967 organelle envelope; GO:0031975 envelope; GO:0043226 organelle; GO:0043227 membrane-bounded organe…	GO:0003824 catalytic activity; GO:0008812 choline dehydrogenase activity; GO:0016491 oxidoreductase activity; GO:0016614 oxidoreductase activity, acting on CH-OH group of donors;	PF00732; PF05199	GMC oxidoreductase; GMC oxidoreductase	E	KOG1238	Glucose dehydrogenase/choline dehydrogenase/mandelonitrile lyase (GMC oxidoreductase family)
A0A286ZM06	87	K	5.405	0.0138575	Up	Choline dehydrogenase OS=Sus scrofa OX=9823 GN=CHDH PE=1 SV=1	CHDH	1	6.18352e-12	192.6	3	LLWK(1)IHMPAALVDNLCDDR	-0.26679	1.27169	1.43551	2.35608	0.490166	0.313208	0.133348	mitochondria	K00108	betA, CHDH; choline dehydrogenase [EC:1.1.99.1]	map00260 Glycine, serine and threonine metabolism; map01100 Metabolic pathways	GO:0001505 regulation of neurotransmitter levels; GO:0006576 cellular biogenic amine metabolic process; GO:0006807 nitrogen compound metabolic process; GO:0008152 metabolic process; GO:0009056 catabolic process; GO:0009308 amine metabolic process; GO:0009310 amine catabolic process; GO:0009987 cellular process; GO:0019695 choline metabolic process; GO:0034641 cellular nitrogen compound metabolic …	GO:0005622 intracellular; GO:0005623 cell; GO:0005737 cytoplasm; GO:0005739 mitochondrion; GO:0005740 mitochondrial envelope; GO:0005743 mitochondrial inner membrane; GO:0016020 membrane; GO:0019866 organelle inner membrane; GO:0031090 organelle membrane; GO:0031966 mitochondrial membrane; GO:0031967 organelle envelope; GO:0031975 envelope; GO:0043226 organelle; GO:0043227 membrane-bounded organe…	GO:0003824 catalytic activity; GO:0008812 choline dehydrogenase activity; GO:0016491 oxidoreductase activity; GO:0016614 oxidoreductase activity, acting on CH-OH group of donors;	PF00732; PF05199	GMC oxidoreductase; GMC oxidoreductase	E	KOG1238	Glucose dehydrogenase/choline dehydrogenase/mandelonitrile lyase (GMC oxidoreductase family)
A0A286ZM06	75	K	6.237	0.0193104	Up	Choline dehydrogenase OS=Sus scrofa OX=9823 GN=CHDH PE=1 SV=1	CHDH	1	3.23473e-10	165.7	2	VLLLEAGPK(1)DLYAGSK	-0.018181	1.31259	2.13473		0.255721	0.296958		mitochondria	K00108	betA, CHDH; choline dehydrogenase [EC:1.1.99.1]	map00260 Glycine, serine and threonine metabolism; map01100 Metabolic pathways	GO:0001505 regulation of neurotransmitter levels; GO:0006576 cellular biogenic amine metabolic process; GO:0006807 nitrogen compound metabolic process; GO:0008152 metabolic process; GO:0009056 catabolic process; GO:0009308 amine metabolic process; GO:0009310 amine catabolic process; GO:0009987 cellular process; GO:0019695 choline metabolic process; GO:0034641 cellular nitrogen compound metabolic …	GO:0005622 intracellular; GO:0005623 cell; GO:0005737 cytoplasm; GO:0005739 mitochondrion; GO:0005740 mitochondrial envelope; GO:0005743 mitochondrial inner membrane; GO:0016020 membrane; GO:0019866 organelle inner membrane; GO:0031090 organelle membrane; GO:0031966 mitochondrial membrane; GO:0031967 organelle envelope; GO:0031975 envelope; GO:0043226 organelle; GO:0043227 membrane-bounded organe…	GO:0003824 catalytic activity; GO:0008812 choline dehydrogenase activity; GO:0016491 oxidoreductase activity; GO:0016614 oxidoreductase activity, acting on CH-OH group of donors;	PF00732; PF05199	GMC oxidoreductase; GMC oxidoreductase	E	KOG1238	Glucose dehydrogenase/choline dehydrogenase/mandelonitrile lyase (GMC oxidoreductase family)
A0A286ZMB2	33	K	0.183	0.0155069	Down	Folate gamma-glutamyl hydrolase OS=Sus scrofa OX=9823 GN=GGH PE=1 SV=1	GGH	1	0.000180887	163.99	2	K(1)PIIGVLMQR	0.23692		0.22919	0.315286	2.02715	1.53354	0.894836	extracellular	K01307	GGH; gamma-glutamyl hydrolase [EC:3.4.19.9]	map00790 Folate biosynthesis; map01523 Antifolate resistance	GO:0001775 cell activation; GO:0002252 immune effector process; GO:0002263 cell activation involved in immune response; GO:0002274 myeloid leukocyte activation; GO:0002275 myeloid cell activation involved in immune response; GO:0002283 neutrophil activation involved in immune response; GO:0002366 leukocyte activation involved in immune response; GO:0002376 immune system process; GO:0002443 leukoc…	GO:0000323 lytic vacuole; GO:0005576 extracellular region; GO:0005615 extracellular space; GO:0005622 intracellular; GO:0005623 cell; GO:0005737 cytoplasm; GO:0005764 lysosome; GO:0005766 primary lysosome; GO:0005773 vacuole; GO:0005775 vacuolar lumen; GO:0005829 cytosol; GO:0012505 endomembrane system; GO:0030141 secretory granule; GO:0031410 cytoplasmic vesicle; GO:0031974 membrane-enclosed lum…	GO:0003824 catalytic activity; GO:0008233 peptidase activity; GO:0008238 exopeptidase activity; GO:0008242 omega peptidase activity; GO:0016787 hydrolase activity; GO:0034722 gamma-glutamyl-peptidase activity; GO:0070011 peptidase activity, acting on L-amino acid peptides; GO:0140096 catalytic activity, acting on a protein;	PF07722	Peptidase C26	H	KOG1559	Gamma-glutamyl hydrolase
K7GLN4	209	K	0.177	0.000197502	Down	Peroxiredoxin 4 OS=Sus scrofa OX=9823 GN=PRDX4 PE=1 SV=2	PRDX4	1	0.00950719	93.667	2	GLFIIDDK(1)GILR	0.78101	0.315334	0.344689	0.386749	2.01877		1.93445	extracellular	K03386	PRDX2_4, ahpC; peroxiredoxin (alkyl hydroperoxide reductase subunit C) [EC:1.11.1.15]	map04214 Apoptosis - fly	GO:0000003 reproduction; GO:0001775 cell activation; GO:0002252 immune effector process; GO:0002263 cell activation involved in immune response; GO:0002274 myeloid leukocyte activation; GO:0002275 myeloid cell activation involved in immune response; GO:0002283 neutrophil activation involved in immune response; GO:0002366 leukocyte activation involved in immune response; GO:0002376 immune system p…	GO:0005576 extracellular region; GO:0005615 extracellular space; GO:0005622 intracellular; GO:0005623 cell; GO:0005737 cytoplasm; GO:0005783 endoplasmic reticulum; GO:0005790 smooth endoplasmic reticulum; GO:0005829 cytosol; GO:0012505 endomembrane system; GO:0030141 secretory granule; GO:0031410 cytoplasmic vesicle; GO:0031974 membrane-enclosed lumen; GO:0031982 vesicle; GO:0031983 vesicle lumen…	GO:0003824 catalytic activity; GO:0004601 peroxidase activity; GO:0005488 binding; GO:0005515 protein binding; GO:0008379 thioredoxin peroxidase activity; GO:0016209 antioxidant activity; GO:0016491 oxidoreductase activity; GO:0016684 oxidoreductase activity, acting on peroxide as acceptor; GO:0042802 identical protein binding; GO:0042803 protein homodimerization activity; GO:0046983 protein dime…	PF00578; PF10417	AhpC/TSA family; C-terminal domain of 1-Cys peroxiredoxin	O	KOG0852	Alkyl hydroperoxide reductase, thiol specific antioxidant and related enzymes
A0A286ZNM0	389	K	13.212	0.0241542	Up	Stabilizer of axonemal microtubules 1 OS=Sus scrofa OX=9823 GN=SAXO1 PE=3 SV=2	SAXO1	1	3.99087e-06	127.5	4	AHYVPHPPMATK(1)SFK	-0.67151	1.2264	0.942592	2.59082	0.1908	0.0493843		nucleus				GO:0006950 response to stress; GO:0009266 response to temperature stimulus; GO:0009409 response to cold; GO:0009628 response to abiotic stimulus; GO:0009631 cold acclimation; GO:0009987 cellular process; GO:0010638 positive regulation of organelle organization; GO:0031344 regulation of cell projection organization; GO:0031346 positive regulation of cell projection organization; GO:0031647 regulat…	GO:0005622 intracellular; GO:0005623 cell; GO:0005737 cytoplasm; GO:0005814 centriole; GO:0005815 microtubule organizing center; GO:0005856 cytoskeleton; GO:0005874 microtubule; GO:0005879 axonemal microtubule; GO:0005881 cytoplasmic microtubule; GO:0005929 cilium; GO:0005930 axoneme; GO:0015630 microtubule cytoskeleton; GO:0031514 motile cilium; GO:0032838 plasma membrane bounded cell projection…	GO:0005488 binding; GO:0005515 protein binding; GO:0008017 microtubule binding; GO:0008092 cytoskeletal protein binding; GO:0015631 tubulin binding;
A0A286ZNM0	343	K	11.966	0.000414486	Up	Stabilizer of axonemal microtubules 1 OS=Sus scrofa OX=9823 GN=SAXO1 PE=3 SV=2	SAXO1	1	0.000158311	156.48	2	FESSTTTK(1)DDYK	0.73326	1.47824	1.49617	2.56283	0.190755	0.118312	0.153689	nucleus				GO:0006950 response to stress; GO:0009266 response to temperature stimulus; GO:0009409 response to cold; GO:0009628 response to abiotic stimulus; GO:0009631 cold acclimation; GO:0009987 cellular process; GO:0010638 positive regulation of organelle organization; GO:0031344 regulation of cell projection organization; GO:0031346 positive regulation of cell projection organization; GO:0031647 regulat…	GO:0005622 intracellular; GO:0005623 cell; GO:0005737 cytoplasm; GO:0005814 centriole; GO:0005815 microtubule organizing center; GO:0005856 cytoskeleton; GO:0005874 microtubule; GO:0005879 axonemal microtubule; GO:0005881 cytoplasmic microtubule; GO:0005929 cilium; GO:0005930 axoneme; GO:0015630 microtubule cytoskeleton; GO:0031514 motile cilium; GO:0032838 plasma membrane bounded cell projection…	GO:0005488 binding; GO:0005515 protein binding; GO:0008017 microtubule binding; GO:0008092 cytoskeletal protein binding; GO:0015631 tubulin binding;
A0A286ZNM0	26	K	10.274	0.00445705	Up	Stabilizer of axonemal microtubules 1 OS=Sus scrofa OX=9823 GN=SAXO1 PE=3 SV=2	SAXO1	1	0.000108513	193.28	3	HHCPHLPTK(1)IYDK	-0.0487	1.43494	1.27048	2.76238	0.306751	0.106258	0.119195	nucleus				GO:0006950 response to stress; GO:0009266 response to temperature stimulus; GO:0009409 response to cold; GO:0009628 response to abiotic stimulus; GO:0009631 cold acclimation; GO:0009987 cellular process; GO:0010638 positive regulation of organelle organization; GO:0031344 regulation of cell projection organization; GO:0031346 positive regulation of cell projection organization; GO:0031647 regulat…	GO:0005622 intracellular; GO:0005623 cell; GO:0005737 cytoplasm; GO:0005814 centriole; GO:0005815 microtubule organizing center; GO:0005856 cytoskeleton; GO:0005874 microtubule; GO:0005879 axonemal microtubule; GO:0005881 cytoplasmic microtubule; GO:0005929 cilium; GO:0005930 axoneme; GO:0015630 microtubule cytoskeleton; GO:0031514 motile cilium; GO:0032838 plasma membrane bounded cell projection…	GO:0005488 binding; GO:0005515 protein binding; GO:0008017 microtubule binding; GO:0008092 cytoskeletal protein binding; GO:0015631 tubulin binding;
A0A286ZNM0	30	K	31.907	0.000626532	Up	Stabilizer of axonemal microtubules 1 OS=Sus scrofa OX=9823 GN=SAXO1 PE=3 SV=2	SAXO1	1	1.08913e-118	386.22	3	IYDK(1)TEKPCLLSEYTENYPLYHSYLPR	-0.12903	1.58611	1.43257	2.79899	0.0984655	0.0467971	0.0370701	nucleus				GO:0006950 response to stress; GO:0009266 response to temperature stimulus; GO:0009409 response to cold; GO:0009628 response to abiotic stimulus; GO:0009631 cold acclimation; GO:0009987 cellular process; GO:0010638 positive regulation of organelle organization; GO:0031344 regulation of cell projection organization; GO:0031346 positive regulation of cell projection organization; GO:0031647 regulat…	GO:0005622 intracellular; GO:0005623 cell; GO:0005737 cytoplasm; GO:0005814 centriole; GO:0005815 microtubule organizing center; GO:0005856 cytoskeleton; GO:0005874 microtubule; GO:0005879 axonemal microtubule; GO:0005881 cytoplasmic microtubule; GO:0005929 cilium; GO:0005930 axoneme; GO:0015630 microtubule cytoskeleton; GO:0031514 motile cilium; GO:0032838 plasma membrane bounded cell projection…	GO:0005488 binding; GO:0005515 protein binding; GO:0008017 microtubule binding; GO:0008092 cytoskeletal protein binding; GO:0015631 tubulin binding;
A0A286ZNM0	64	K	3.127	0.0301824	Up	Stabilizer of axonemal microtubules 1 OS=Sus scrofa OX=9823 GN=SAXO1 PE=3 SV=2	SAXO1	1	1.22025e-19	254.4	3	LEYQK(1)GCTPMEGLTTSR	-0.0040466	1.41049	1.46587	1.24494		0.267751	0.610953	nucleus				GO:0006950 response to stress; GO:0009266 response to temperature stimulus; GO:0009409 response to cold; GO:0009628 response to abiotic stimulus; GO:0009631 cold acclimation; GO:0009987 cellular process; GO:0010638 positive regulation of organelle organization; GO:0031344 regulation of cell projection organization; GO:0031346 positive regulation of cell projection organization; GO:0031647 regulat…	GO:0005622 intracellular; GO:0005623 cell; GO:0005737 cytoplasm; GO:0005814 centriole; GO:0005815 microtubule organizing center; GO:0005856 cytoskeleton; GO:0005874 microtubule; GO:0005879 axonemal microtubule; GO:0005881 cytoplasmic microtubule; GO:0005929 cilium; GO:0005930 axoneme; GO:0015630 microtubule cytoskeleton; GO:0031514 motile cilium; GO:0032838 plasma membrane bounded cell projection…	GO:0005488 binding; GO:0005515 protein binding; GO:0008017 microtubule binding; GO:0008092 cytoskeletal protein binding; GO:0015631 tubulin binding;
A0A286ZNM0	317	K	13.082	0.00077857	Up	Stabilizer of axonemal microtubules 1 OS=Sus scrofa OX=9823 GN=SAXO1 PE=3 SV=2	SAXO1	1	3.14071e-13	177.91	3	MDLMTTAQAHYTYPK(1)GGPAQSCR	-0.10988	1.68052	1.56976	2.32366	0.218616	0.0921314	0.115316	nucleus				GO:0006950 response to stress; GO:0009266 response to temperature stimulus; GO:0009409 response to cold; GO:0009628 response to abiotic stimulus; GO:0009631 cold acclimation; GO:0009987 cellular process; GO:0010638 positive regulation of organelle organization; GO:0031344 regulation of cell projection organization; GO:0031346 positive regulation of cell projection organization; GO:0031647 regulat…	GO:0005622 intracellular; GO:0005623 cell; GO:0005737 cytoplasm; GO:0005814 centriole; GO:0005815 microtubule organizing center; GO:0005856 cytoskeleton; GO:0005874 microtubule; GO:0005879 axonemal microtubule; GO:0005881 cytoplasmic microtubule; GO:0005929 cilium; GO:0005930 axoneme; GO:0015630 microtubule cytoskeleton; GO:0031514 motile cilium; GO:0032838 plasma membrane bounded cell projection…	GO:0005488 binding; GO:0005515 protein binding; GO:0008017 microtubule binding; GO:0008092 cytoskeletal protein binding; GO:0015631 tubulin binding;
A0A286ZNM0	183	K	16.949	0.0008072	Up	Stabilizer of axonemal microtubules 1 OS=Sus scrofa OX=9823 GN=SAXO1 PE=3 SV=2	SAXO1	1	2.7696e-33	257.51	3	TTHQDDYSMK(1)GLVNTTSCK	0.23526	2.27624	1.27816	2.11131	0.173263	0.0849809	0.0760417	nucleus				GO:0006950 response to stress; GO:0009266 response to temperature stimulus; GO:0009409 response to cold; GO:0009628 response to abiotic stimulus; GO:0009631 cold acclimation; GO:0009987 cellular process; GO:0010638 positive regulation of organelle organization; GO:0031344 regulation of cell projection organization; GO:0031346 positive regulation of cell projection organization; GO:0031647 regulat…	GO:0005622 intracellular; GO:0005623 cell; GO:0005737 cytoplasm; GO:0005814 centriole; GO:0005815 microtubule organizing center; GO:0005856 cytoskeleton; GO:0005874 microtubule; GO:0005879 axonemal microtubule; GO:0005881 cytoplasmic microtubule; GO:0005929 cilium; GO:0005930 axoneme; GO:0015630 microtubule cytoskeleton; GO:0031514 motile cilium; GO:0032838 plasma membrane bounded cell projection…	GO:0005488 binding; GO:0005515 protein binding; GO:0008017 microtubule binding; GO:0008092 cytoskeletal protein binding; GO:0015631 tubulin binding;
A0A5G2QSJ2	26	K	17.709	9.98356e-05	Up	Malic enzyme OS=Sus scrofa OX=9823 GN=ME2 PE=1 SV=1	ME2	1	0.0145788	93.561	2	GK(1)PLMLNPR	-0.080455	1.57066	1.79208	2.31657	0.138349	0.0978257	0.0845245	mitochondria	K00027	ME2, sfcA, maeA; malate dehydrogenase (oxaloacetate-decarboxylating) [EC:1.1.1.38]	map00620 Pyruvate metabolism; map01200 Carbon metabolism	GO:0006082 organic acid metabolic process; GO:0006090 pyruvate metabolic process; GO:0006091 generation of precursor metabolites and energy; GO:0006099 tricarboxylic acid cycle; GO:0006101 citrate metabolic process; GO:0006108 malate metabolic process; GO:0006140 regulation of nucleotide metabolic process; GO:0008152 metabolic process; GO:0009060 aerobic respiration; GO:0009987 cellular process; …	GO:0005622 intracellular; GO:0005623 cell; GO:0005737 cytoplasm; GO:0005739 mitochondrion; GO:0005759 mitochondrial matrix; GO:0031974 membrane-enclosed lumen; GO:0043226 organelle; GO:0043227 membrane-bounded organelle; GO:0043229 intracellular organelle; GO:0043231 intracellular membrane-bounded organelle; GO:0043233 organelle lumen; GO:0070013 intracellular organelle lumen;	GO:0003824 catalytic activity; GO:0004470 malic enzyme activity; GO:0004471 malate dehydrogenase (decarboxylating) (NAD+) activity; GO:0004473 malate dehydrogenase (decarboxylating) (NADP+) activity; GO:0009055 electron transfer activity; GO:0016491 oxidoreductase activity; GO:0016614 oxidoreductase activity, acting on CH-OH group of donors; GO:0016615 malate dehydrogenase activity; GO:0016616 ox…	PF00390; PF03949	Malic enzyme, N-terminal domain; Malic enzyme, NAD binding domain	C	KOG1257	NADP+-dependent malic enzyme
A0A5G2QSJ2	300	K	7.223	0.0341106	Up	Malic enzyme OS=Sus scrofa OX=9823 GN=ME2 PE=1 SV=1	ME2	1	0.0274695	44.945	3	VIGK(1)SISEHK	-0.089299		1.16285	2.3507	0.22051		0.265932	mitochondria	K00027	ME2, sfcA, maeA; malate dehydrogenase (oxaloacetate-decarboxylating) [EC:1.1.1.38]	map00620 Pyruvate metabolism; map01200 Carbon metabolism	GO:0006082 organic acid metabolic process; GO:0006090 pyruvate metabolic process; GO:0006091 generation of precursor metabolites and energy; GO:0006099 tricarboxylic acid cycle; GO:0006101 citrate metabolic process; GO:0006108 malate metabolic process; GO:0006140 regulation of nucleotide metabolic process; GO:0008152 metabolic process; GO:0009060 aerobic respiration; GO:0009987 cellular process; …	GO:0005622 intracellular; GO:0005623 cell; GO:0005737 cytoplasm; GO:0005739 mitochondrion; GO:0005759 mitochondrial matrix; GO:0031974 membrane-enclosed lumen; GO:0043226 organelle; GO:0043227 membrane-bounded organelle; GO:0043229 intracellular organelle; GO:0043231 intracellular membrane-bounded organelle; GO:0043233 organelle lumen; GO:0070013 intracellular organelle lumen;	GO:0003824 catalytic activity; GO:0004470 malic enzyme activity; GO:0004471 malate dehydrogenase (decarboxylating) (NAD+) activity; GO:0004473 malate dehydrogenase (decarboxylating) (NADP+) activity; GO:0009055 electron transfer activity; GO:0016491 oxidoreductase activity; GO:0016614 oxidoreductase activity, acting on CH-OH group of donors; GO:0016615 malate dehydrogenase activity; GO:0016616 ox…	PF00390; PF03949	Malic enzyme, N-terminal domain; Malic enzyme, NAD binding domain	C	KOG1257	NADP+-dependent malic enzyme
A0A286ZP34	236	K	24.804	0.00101474	Up	HYDIN axonemal central pair apparatus protein OS=Sus scrofa OX=9823 GN=HYDIN PE=4 SV=2	HYDIN	1	0.0172191	57.019	3	DAVFHIK(1)THR	-0.88736	1.55066	1.41433	2.8025	0.119386	0.0403538	0.0727785	cytoplasm	K17570	HYDIN; hydrocephalus-inducing protein		GO:0000226 microtubule cytoskeleton organization; GO:0001578 microtubule bundle formation; GO:0002064 epithelial cell development; GO:0003341 cilium movement; GO:0006928 movement of cell or subcellular component; GO:0006996 organelle organization; GO:0007010 cytoskeleton organization; GO:0007017 microtubule-based process; GO:0007018 microtubule-based movement; GO:0007275 multicellular organism de…	GO:0005622 intracellular; GO:0005623 cell; GO:0005737 cytoplasm; GO:0005856 cytoskeleton; GO:0005929 cilium; GO:0005930 axoneme; GO:0032838 plasma membrane bounded cell projection cytoplasm; GO:0042995 cell projection; GO:0043226 organelle; GO:0043228 non-membrane-bounded organelle; GO:0043229 intracellular organelle; GO:0043232 intracellular non-membrane-bounded organelle; GO:0097014 ciliary pla…
P35495	93	K	0.001	0.00026098	Down	Major seminal plasma glycoprotein PSP-I OS=Sus scrofa OX=9823 PE=1 SV=2	--	1	2.271e-38	297.83	2	SLGK(1)FCEGLSILNR	-0.35894	0.00160621	0.000601589		1.67047	1.6832	1.64412	extracellular	K14616	CUBN; cubilin	map04977 Vitamin digestion and absorption		GO:0005576 extracellular region;		PF00431	CUB domain
P35495	48	K	0.012	3.28256e-05	Down	Major seminal plasma glycoprotein PSP-I OS=Sus scrofa OX=9823 PE=1 SV=2	--	1	3.88819e-31	295.86	3	GPK(1)TECVWTLQVDPK(1)YK	0.60162	0.0336755	0.0194979	0.0192206	2.41641	1.67281	1.83838	extracellular	K14616	CUBN; cubilin	map04977 Vitamin digestion and absorption		GO:0005576 extracellular region;		PF00431	CUB domain
P35495	60	K	0.006	0.000126537	Down	Major seminal plasma glycoprotein PSP-I OS=Sus scrofa OX=9823 PE=1 SV=2	--	1	1.2155e-38	306.48	3	TECVWTLQVDPK(1)YK	1.5958	0.0190501	0.00775628	0.00751165	2.34951	1.32999	2.28618	extracellular	K14616	CUBN; cubilin	map04977 Vitamin digestion and absorption		GO:0005576 extracellular region;		PF00431	CUB domain
P35495	45	K	0.002	2.37642e-05	Down	Major seminal plasma glycoprotein PSP-I OS=Sus scrofa OX=9823 PE=1 SV=2	--	1	4.28991e-22	267.02	3	LTDDYGTIFTYK(1)GPK	-1.0521	0.00553104	0.0031719	0.00224178	1.77137	2.45326	1.76442	extracellular	K14616	CUBN; cubilin	map04977 Vitamin digestion and absorption		GO:0005576 extracellular region;		PF00431	CUB domain
A0A286ZPL5	434	K	8.906	0.00524077	Up	WD_REPEATS_REGION domain-containing protein OS=Sus scrofa OX=9823 GN=DNAI1 PE=4 SV=2	DNAI1	1	2.60651e-09	237.68	2	SGK(1)HTDPVWQVR	0.10058	1.47437	1.09106	2.08634	0.213719	0.1345		nucleus	K10409	DNAI1; dynein intermediate chain 1, axonemal	map05016 Huntington disease	GO:0000226 microtubule cytoskeleton organization; GO:0001578 microtubule bundle formation; GO:0003341 cilium movement; GO:0003351 epithelial cilium movement involved in extracellular fluid movement; GO:0006928 movement of cell or subcellular component; GO:0006996 organelle organization; GO:0007010 cytoskeleton organization; GO:0007017 microtubule-based process; GO:0007018 microtubule-based moveme…	GO:0005622 intracellular; GO:0005623 cell; GO:0005737 cytoplasm; GO:0005813 centrosome; GO:0005815 microtubule organizing center; GO:0005856 cytoskeleton; GO:0005858 axonemal dynein complex; GO:0005875 microtubule associated complex; GO:0005929 cilium; GO:0005930 axoneme; GO:0015630 microtubule cytoskeleton; GO:0030286 dynein complex; GO:0032838 plasma membrane bounded cell projection cytoplasm; …	GO:0003774 motor activity; GO:0003824 catalytic activity; GO:0005488 binding; GO:0005515 protein binding; GO:0016462 pyrophosphatase activity; GO:0016787 hydrolase activity; GO:0016817 hydrolase activity, acting on acid anhydrides; GO:0016818 hydrolase activity, acting on acid anhydrides, in phosphorus-containing anhydrides; GO:0017111 nucleoside-triphosphatase activity; GO:0045503 dynein light c…			Z	KOG1587	Cytoplasmic dynein intermediate chain
F1RSC3	412	K	0.571	0.0157343	Down	Carboxypeptidase OS=Sus scrofa OX=9823 GN=SCPEP1 PE=1 SV=3	SCPEP1	1	0.00575889	103.18	2	SSETSAFVK(1)SYK	-0.014573	0.609965	0.880249	0.690424	1.21707	1.10552	1.49677	extracellular	K09646	SCPEP1; serine carboxypeptidase 1 [EC:3.4.16.-]		GO:0001523 retinoid metabolic process; GO:0003008 system process; GO:0003013 circulatory system process; GO:0003018 vascular process in circulatory system; GO:0006082 organic acid metabolic process; GO:0006508 proteolysis; GO:0006629 lipid metabolic process; GO:0006720 isoprenoid metabolic process; GO:0006721 terpenoid metabolic process; GO:0006807 nitrogen compound metabolic process; GO:0008015 …	GO:0005622 intracellular; GO:0005623 cell; GO:0005737 cytoplasm; GO:0005829 cytosol;	GO:0003824 catalytic activity; GO:0004180 carboxypeptidase activity; GO:0004185 serine-type carboxypeptidase activity; GO:0008233 peptidase activity; GO:0008236 serine-type peptidase activity; GO:0008238 exopeptidase activity; GO:0016787 hydrolase activity; GO:0017171 serine hydrolase activity; GO:0070008 serine-type exopeptidase activity; GO:0070011 peptidase activity, acting on L-amino acid pep…	PF00450	Serine carboxypeptidase	O	KOG1283	Serine carboxypeptidases
A0A286ZPN4	479	K	4.376	0.00882883	Up	Heat shock cognate 71 kDa protein isoform X1(predicted) OS=Sus scrofa OX=9823 GN=HSPA8 PE=1 SV=1	HSPA8	1	0.00132567	133.98	2	ITITNDK(1)GR	0.61685	1.75931	1.3661	1.7586	0.624201	0.273905	0.217885	cytoplasm	K03283	HSPA1s; heat shock 70kDa protein 1/2/6/8	map03040 Spliceosome; map04010 MAPK signaling pathway; map04141 Protein processing in endoplasmic reticulum; map04144 Endocytosis; map04213 Longevity regulating pathway - multiple species; map04612 Antigen processing and presentation; map04915 Estrogen signaling pathway; map05134 Legionellosis; map05145 Toxoplasmosis; map05162 Measles	GO:0000003 reproduction; GO:0000082 G1/S transition of mitotic cell cycle; GO:0000278 mitotic cell cycle; GO:0000375 RNA splicing, via transesterification reactions; GO:0000377 RNA splicing, via transesterification reactions with bulged adenosine as nucleophile; GO:0000398 mRNA splicing, via spliceosome; GO:0001655 urogenital system development; GO:0001775 cell activation; GO:0001822 kidney devel…	GO:0000323 lytic vacuole; GO:0000974 Prp19 complex; GO:0001917 photoreceptor inner segment; GO:0005576 extracellular region; GO:0005615 extracellular space; GO:0005622 intracellular; GO:0005623 cell; GO:0005634 nucleus; GO:0005654 nucleoplasm; GO:0005730 nucleolus; GO:0005737 cytoplasm; GO:0005764 lysosome; GO:0005765 lysosomal membrane; GO:0005768 endosome; GO:0005770 late endosome; GO:0005773 v…	GO:0000166 nucleotide binding; GO:0001664 G protein-coupled receptor binding; GO:0001786 phosphatidylserine binding; GO:0003676 nucleic acid binding; GO:0003723 RNA binding; GO:0003824 catalytic activity; GO:0005102 signaling receptor binding; GO:0005488 binding; GO:0005504 fatty acid binding; GO:0005515 protein binding; GO:0005524 ATP binding; GO:0005543 phospholipid binding; GO:0008134 transcri…			O	KOG0101	Molecular chaperones HSP70/HSC70, HSP70 superfamily
A0A286ZPN4	102	K	2.714	0.0319412	Up	Heat shock cognate 71 kDa protein isoform X1(predicted) OS=Sus scrofa OX=9823 GN=HSPA8 PE=1 SV=1	HSPA8	1	0.0040057	132.76	2	PK(1)VQVEYK	-0.59587	1.36073	1.42119	1.60275	0.942252	0.350064	0.323018	cytoplasm	K03283	HSPA1s; heat shock 70kDa protein 1/2/6/8	map03040 Spliceosome; map04010 MAPK signaling pathway; map04141 Protein processing in endoplasmic reticulum; map04144 Endocytosis; map04213 Longevity regulating pathway - multiple species; map04612 Antigen processing and presentation; map04915 Estrogen signaling pathway; map05134 Legionellosis; map05145 Toxoplasmosis; map05162 Measles	GO:0000003 reproduction; GO:0000082 G1/S transition of mitotic cell cycle; GO:0000278 mitotic cell cycle; GO:0000375 RNA splicing, via transesterification reactions; GO:0000377 RNA splicing, via transesterification reactions with bulged adenosine as nucleophile; GO:0000398 mRNA splicing, via spliceosome; GO:0001655 urogenital system development; GO:0001775 cell activation; GO:0001822 kidney devel…	GO:0000323 lytic vacuole; GO:0000974 Prp19 complex; GO:0001917 photoreceptor inner segment; GO:0005576 extracellular region; GO:0005615 extracellular space; GO:0005622 intracellular; GO:0005623 cell; GO:0005634 nucleus; GO:0005654 nucleoplasm; GO:0005730 nucleolus; GO:0005737 cytoplasm; GO:0005764 lysosome; GO:0005765 lysosomal membrane; GO:0005768 endosome; GO:0005770 late endosome; GO:0005773 v…	GO:0000166 nucleotide binding; GO:0001664 G protein-coupled receptor binding; GO:0001786 phosphatidylserine binding; GO:0003676 nucleic acid binding; GO:0003723 RNA binding; GO:0003824 catalytic activity; GO:0005102 signaling receptor binding; GO:0005488 binding; GO:0005504 fatty acid binding; GO:0005515 protein binding; GO:0005524 ATP binding; GO:0005543 phospholipid binding; GO:0008134 transcri…			O	KOG0101	Molecular chaperones HSP70/HSC70, HSP70 superfamily
F1SM98	68	K	11.529	0.0011361	Up	NADH dehydrogenase [ubiquinone] flavoprotein 2, mitochondrial OS=Sus scrofa OX=9823 GN=NDUFV2 PE=1 SV=2	NDUFV2	1	6.07472e-06	187.31	3	RIEAIVK(1)NYPEGHK	0.20638	2.14107	1.2662	2.11384	0.242565	0.111799	0.124522	mitochondria	K03943	NDUFV2; NADH dehydrogenase (ubiquinone) flavoprotein 2 [EC:7.1.1.2 1.6.99.3]	map00190 Oxidative phosphorylation; map01100 Metabolic pathways; map04714 Thermogenesis; map04723 Retrograde endocannabinoid signaling; map04932 Non-alcoholic fatty liver disease (NAFLD); map05010 Alzheimer disease; map05012 Parkinson disease; map05016 Huntington disease	GO:0006091 generation of precursor metabolites and energy; GO:0006119 oxidative phosphorylation; GO:0006120 mitochondrial electron transport, NADH to ubiquinone; GO:0006139 nucleobase-containing compound metabolic process; GO:0006163 purine nucleotide metabolic process; GO:0006725 cellular aromatic compound metabolic process; GO:0006753 nucleoside phosphate metabolic process; GO:0006793 phosphoru…	GO:0005622 intracellular; GO:0005623 cell; GO:0005737 cytoplasm; GO:0005739 mitochondrion; GO:0005740 mitochondrial envelope; GO:0005743 mitochondrial inner membrane; GO:0005746 mitochondrial respirasome; GO:0005747 mitochondrial respiratory chain complex I; GO:0016020 membrane; GO:0019866 organelle inner membrane; GO:0030964 NADH dehydrogenase complex; GO:0031090 organelle membrane; GO:0031966 m…	GO:0003824 catalytic activity; GO:0003954 NADH dehydrogenase activity; GO:0008137 NADH dehydrogenase (ubiquinone) activity; GO:0009055 electron transfer activity; GO:0016491 oxidoreductase activity; GO:0016651 oxidoreductase activity, acting on NAD(P)H; GO:0016655 oxidoreductase activity, acting on NAD(P)H, quinone or similar compound as acceptor; GO:0050136 NADH dehydrogenase (quinone) activity;			C	KOG3196	NADH:ubiquinone oxidoreductase, NDUFV2/24 kD subunit
F1SM98	75	K	2.801	0.0175479	Up	NADH dehydrogenase [ubiquinone] flavoprotein 2, mitochondrial OS=Sus scrofa OX=9823 GN=NDUFV2 PE=1 SV=2	NDUFV2	1	0.000534222	85.932	3	NYPEGHK(1)AAAVLPVLDLAQR	-1.0777	1.5731	1.37445			0.589812	0.462634	mitochondria	K03943	NDUFV2; NADH dehydrogenase (ubiquinone) flavoprotein 2 [EC:7.1.1.2 1.6.99.3]	map00190 Oxidative phosphorylation; map01100 Metabolic pathways; map04714 Thermogenesis; map04723 Retrograde endocannabinoid signaling; map04932 Non-alcoholic fatty liver disease (NAFLD); map05010 Alzheimer disease; map05012 Parkinson disease; map05016 Huntington disease	GO:0006091 generation of precursor metabolites and energy; GO:0006119 oxidative phosphorylation; GO:0006120 mitochondrial electron transport, NADH to ubiquinone; GO:0006139 nucleobase-containing compound metabolic process; GO:0006163 purine nucleotide metabolic process; GO:0006725 cellular aromatic compound metabolic process; GO:0006753 nucleoside phosphate metabolic process; GO:0006793 phosphoru…	GO:0005622 intracellular; GO:0005623 cell; GO:0005737 cytoplasm; GO:0005739 mitochondrion; GO:0005740 mitochondrial envelope; GO:0005743 mitochondrial inner membrane; GO:0005746 mitochondrial respirasome; GO:0005747 mitochondrial respiratory chain complex I; GO:0016020 membrane; GO:0019866 organelle inner membrane; GO:0030964 NADH dehydrogenase complex; GO:0031090 organelle membrane; GO:0031966 m…	GO:0003824 catalytic activity; GO:0003954 NADH dehydrogenase activity; GO:0008137 NADH dehydrogenase (ubiquinone) activity; GO:0009055 electron transfer activity; GO:0016491 oxidoreductase activity; GO:0016651 oxidoreductase activity, acting on NAD(P)H; GO:0016655 oxidoreductase activity, acting on NAD(P)H, quinone or similar compound as acceptor; GO:0050136 NADH dehydrogenase (quinone) activity;			C	KOG3196	NADH:ubiquinone oxidoreductase, NDUFV2/24 kD subunit
F1SM98	129	K	8.43	0.00183162	Up	NADH dehydrogenase [ubiquinone] flavoprotein 2, mitochondrial OS=Sus scrofa OX=9823 GN=NDUFV2 PE=1 SV=2	NDUFV2	0.999999	1.39096e-11	187.39	3	KPVGK(1)YHIQVCTTTPCMLR	-0.40942	1.15603	2.30693	1.90077	0.303165	0.15366	0.179452	mitochondria	K03943	NDUFV2; NADH dehydrogenase (ubiquinone) flavoprotein 2 [EC:7.1.1.2 1.6.99.3]	map00190 Oxidative phosphorylation; map01100 Metabolic pathways; map04714 Thermogenesis; map04723 Retrograde endocannabinoid signaling; map04932 Non-alcoholic fatty liver disease (NAFLD); map05010 Alzheimer disease; map05012 Parkinson disease; map05016 Huntington disease	GO:0006091 generation of precursor metabolites and energy; GO:0006119 oxidative phosphorylation; GO:0006120 mitochondrial electron transport, NADH to ubiquinone; GO:0006139 nucleobase-containing compound metabolic process; GO:0006163 purine nucleotide metabolic process; GO:0006725 cellular aromatic compound metabolic process; GO:0006753 nucleoside phosphate metabolic process; GO:0006793 phosphoru…	GO:0005622 intracellular; GO:0005623 cell; GO:0005737 cytoplasm; GO:0005739 mitochondrion; GO:0005740 mitochondrial envelope; GO:0005743 mitochondrial inner membrane; GO:0005746 mitochondrial respirasome; GO:0005747 mitochondrial respiratory chain complex I; GO:0016020 membrane; GO:0019866 organelle inner membrane; GO:0030964 NADH dehydrogenase complex; GO:0031090 organelle membrane; GO:0031966 m…	GO:0003824 catalytic activity; GO:0003954 NADH dehydrogenase activity; GO:0008137 NADH dehydrogenase (ubiquinone) activity; GO:0009055 electron transfer activity; GO:0016491 oxidoreductase activity; GO:0016651 oxidoreductase activity, acting on NAD(P)H; GO:0016655 oxidoreductase activity, acting on NAD(P)H, quinone or similar compound as acceptor; GO:0050136 NADH dehydrogenase (quinone) activity;			C	KOG3196	NADH:ubiquinone oxidoreductase, NDUFV2/24 kD subunit
F1SM98	154	K	9.941	0.000565708	Up	NADH dehydrogenase [ubiquinone] flavoprotein 2, mitochondrial OS=Sus scrofa OX=9823 GN=NDUFV2 PE=1 SV=2	NDUFV2	1	1.26195e-13	251.43	2	NSDSILEAIQK(1)K	0.38184	1.79098	2.08905	1.57155	0.269162	0.143711	0.135543	mitochondria	K03943	NDUFV2; NADH dehydrogenase (ubiquinone) flavoprotein 2 [EC:7.1.1.2 1.6.99.3]	map00190 Oxidative phosphorylation; map01100 Metabolic pathways; map04714 Thermogenesis; map04723 Retrograde endocannabinoid signaling; map04932 Non-alcoholic fatty liver disease (NAFLD); map05010 Alzheimer disease; map05012 Parkinson disease; map05016 Huntington disease	GO:0006091 generation of precursor metabolites and energy; GO:0006119 oxidative phosphorylation; GO:0006120 mitochondrial electron transport, NADH to ubiquinone; GO:0006139 nucleobase-containing compound metabolic process; GO:0006163 purine nucleotide metabolic process; GO:0006725 cellular aromatic compound metabolic process; GO:0006753 nucleoside phosphate metabolic process; GO:0006793 phosphoru…	GO:0005622 intracellular; GO:0005623 cell; GO:0005737 cytoplasm; GO:0005739 mitochondrion; GO:0005740 mitochondrial envelope; GO:0005743 mitochondrial inner membrane; GO:0005746 mitochondrial respirasome; GO:0005747 mitochondrial respiratory chain complex I; GO:0016020 membrane; GO:0019866 organelle inner membrane; GO:0030964 NADH dehydrogenase complex; GO:0031090 organelle membrane; GO:0031966 m…	GO:0003824 catalytic activity; GO:0003954 NADH dehydrogenase activity; GO:0008137 NADH dehydrogenase (ubiquinone) activity; GO:0009055 electron transfer activity; GO:0016491 oxidoreductase activity; GO:0016651 oxidoreductase activity, acting on NAD(P)H; GO:0016655 oxidoreductase activity, acting on NAD(P)H, quinone or similar compound as acceptor; GO:0050136 NADH dehydrogenase (quinone) activity;			C	KOG3196	NADH:ubiquinone oxidoreductase, NDUFV2/24 kD subunit
I3L8T2	286	K	39.045	0.000389293	Up	Solute carrier family 25 member 12 OS=Sus scrofa OX=9823 GN=SLC25A12 PE=1 SV=2	SLC25A12	1	0.0111873	105.14	2	NSFDCFK(1)K	0.49831	1.44111	1.50402	1.97093		0.0328802	0.0510576	cytoplasm	K15105	SLC25A12_13, AGC; solute carrier family 25 (mitochondrial aspartate/glutamate transporter), member 12/13		GO:0003333 amino acid transmembrane transport; GO:0005975 carbohydrate metabolic process; GO:0005996 monosaccharide metabolic process; GO:0006006 glucose metabolic process; GO:0006091 generation of precursor metabolites and energy; GO:0006094 gluconeogenesis; GO:0006139 nucleobase-containing compound metabolic process; GO:0006163 purine nucleotide metabolic process; GO:0006164 purine nucleotide b…	GO:0005622 intracellular; GO:0005623 cell; GO:0005737 cytoplasm; GO:0005739 mitochondrion; GO:0005740 mitochondrial envelope; GO:0005743 mitochondrial inner membrane; GO:0016020 membrane; GO:0016021 integral component of membrane; GO:0019866 organelle inner membrane; GO:0031090 organelle membrane; GO:0031224 intrinsic component of membrane; GO:0031966 mitochondrial membrane; GO:0031967 organelle …	GO:0005215 transporter activity; GO:0005310 dicarboxylic acid transmembrane transporter activity; GO:0005313 L-glutamate transmembrane transporter activity; GO:0005326 neurotransmitter transmembrane transporter activity; GO:0005342 organic acid transmembrane transporter activity; GO:0005488 binding; GO:0005509 calcium ion binding; GO:0005515 protein binding; GO:0008509 anion transmembrane transpo…			C	KOG0751	Mitochondrial aspartate/glutamate carrier protein Aralar/Citrin (contains EF-hand Ca2+-binding domains)
A0A286ZZK2	63	K	5.085	0.0139245	Up	Integrin-associated protein OS=Sus scrofa OX=9823 GN=CD47 PE=1 SV=2	CD47	1	0.00266459	83.751	3	GK(1)DIFIFDGAQHISK	0.68632	0.839005	1.47764	2.69735	0.407291	0.332531	0.246186	plasma membrane	K06266	CD47; CD47 antigen (Rh-related antigen, integrin-associated signal transducer)	map04512 ECM-receptor interaction	GO:0001775 cell activation; GO:0002252 immune effector process; GO:0002263 cell activation involved in immune response; GO:0002274 myeloid leukocyte activation; GO:0002275 myeloid cell activation involved in immune response; GO:0002283 neutrophil activation involved in immune response; GO:0002366 leukocyte activation involved in immune response; GO:0002376 immune system process; GO:0002443 leukoc…	GO:0005576 extracellular region; GO:0005615 extracellular space; GO:0005622 intracellular; GO:0005623 cell; GO:0005737 cytoplasm; GO:0005886 plasma membrane; GO:0005887 integral component of plasma membrane; GO:0012505 endomembrane system; GO:0012506 vesicle membrane; GO:0016020 membrane; GO:0016021 integral component of membrane; GO:0030141 secretory granule; GO:0030659 cytoplasmic vesicle membr…	GO:0038023 signaling receptor activity; GO:0060089 molecular transducer activity; GO:0070053 thrombospondin receptor activity;	PF08204	CD47 immunoglobulin-like domain
A0A5G2QKF1	458	K	12.501	0.00570543	Up	Nucleoporin 155 OS=Sus scrofa OX=9823 GN=NUP155 PE=1 SV=1	NUP155	1	0.00602942	167.82	2	VFK(1)SGNR	-0.11161	1.1265	1.12567	2.49469	0.119999		0.133147	cytoplasm	K14312	NUP155, NUP170, NUP157; nuclear pore complex protein Nup155	map03013 RNA transport	GO:0000972 transcription-dependent tethering of RNA polymerase II gene DNA at nuclear periphery; GO:0001508 action potential; GO:0003008 system process; GO:0003012 muscle system process; GO:0003013 circulatory system process; GO:0003015 heart process; GO:0006403 RNA localization; GO:0006405 RNA export from nucleus; GO:0006406 mRNA export from nucleus; GO:0006606 protein import into nucleus; GO:00…	GO:0005622 intracellular; GO:0005623 cell; GO:0005634 nucleus; GO:0005635 nuclear envelope; GO:0005643 nuclear pore; GO:0005737 cytoplasm; GO:0012505 endomembrane system; GO:0016020 membrane; GO:0031090 organelle membrane; GO:0031965 nuclear membrane; GO:0031967 organelle envelope; GO:0031975 envelope; GO:0032991 protein-containing complex; GO:0043226 organelle; GO:0043227 membrane-bounded organe…	GO:0005198 structural molecule activity; GO:0005215 transporter activity; GO:0017056 structural constituent of nuclear pore;	PF08801	Nup133 N terminal like	UY	KOG1900	Nuclear pore complex, Nup155 component (D Nup154, sc Nup157/Nup170)
A0A5G2QKF1	869	K	7.452	0.0405267	Up	Nucleoporin 155 OS=Sus scrofa OX=9823 GN=NUP155 PE=1 SV=1	NUP155	1	2.39511e-08	159.88	3	VLSK(1)LADMHSTEISLQQR	-0.034709		1.14858	2.37817	0.193913		0.279341	cytoplasm	K14312	NUP155, NUP170, NUP157; nuclear pore complex protein Nup155	map03013 RNA transport	GO:0000972 transcription-dependent tethering of RNA polymerase II gene DNA at nuclear periphery; GO:0001508 action potential; GO:0003008 system process; GO:0003012 muscle system process; GO:0003013 circulatory system process; GO:0003015 heart process; GO:0006403 RNA localization; GO:0006405 RNA export from nucleus; GO:0006406 mRNA export from nucleus; GO:0006606 protein import into nucleus; GO:00…	GO:0005622 intracellular; GO:0005623 cell; GO:0005634 nucleus; GO:0005635 nuclear envelope; GO:0005643 nuclear pore; GO:0005737 cytoplasm; GO:0012505 endomembrane system; GO:0016020 membrane; GO:0031090 organelle membrane; GO:0031965 nuclear membrane; GO:0031967 organelle envelope; GO:0031975 envelope; GO:0032991 protein-containing complex; GO:0043226 organelle; GO:0043227 membrane-bounded organe…	GO:0005198 structural molecule activity; GO:0005215 transporter activity; GO:0017056 structural constituent of nuclear pore;	PF08801	Nup133 N terminal like	UY	KOG1900	Nuclear pore complex, Nup155 component (D Nup154, sc Nup157/Nup170)
A0A286ZQ79	157	K	2.629	0.0434756	Up	Adenylate kinase isoenzyme 1 OS=Sus scrofa OX=9823 GN=AK1 PE=3 SV=2	AK1	1	0.00042238	135.55	2	DAMVAK(1)VDTSK	-0.13521	1.31059	1.1152	1.92081	0.911542	0.434503	0.307352	cytoplasm	K00939	adk, AK; adenylate kinase [EC:2.7.4.3]	map00230 Purine metabolism; map00730 Thiamine metabolism; map01100 Metabolic pathways	GO:0006139 nucleobase-containing compound metabolic process; GO:0006163 purine nucleotide metabolic process; GO:0006164 purine nucleotide biosynthetic process; GO:0006165 nucleoside diphosphate phosphorylation; GO:0006172 ADP biosynthetic process; GO:0006725 cellular aromatic compound metabolic process; GO:0006753 nucleoside phosphate metabolic process; GO:0006793 phosphorus metabolic process; GO…	GO:0001520 outer dense fiber; GO:0005622 intracellular; GO:0005623 cell; GO:0005737 cytoplasm; GO:0005829 cytosol; GO:0005856 cytoskeleton; GO:0005886 plasma membrane; GO:0005929 cilium; GO:0016020 membrane; GO:0030016 myofibril; GO:0030017 sarcomere; GO:0031514 motile cilium; GO:0036126 sperm flagellum; GO:0042995 cell projection; GO:0043005 neuron projection; GO:0043226 organelle; GO:0043228 no…	GO:0003824 catalytic activity; GO:0004017 adenylate kinase activity; GO:0004550 nucleoside diphosphate kinase activity; GO:0016301 kinase activity; GO:0016740 transferase activity; GO:0016772 transferase activity, transferring phosphorus-containing groups; GO:0016776 phosphotransferase activity, phosphate group as acceptor; GO:0019205 nucleobase-containing compound kinase activity; GO:0050145 nuc…	PF00406	Adenylate kinase	F	KOG3079	Uridylate kinase/adenylate kinase
A0A286ZQ79	95	K	5.433	0.0175511	Up	Adenylate kinase isoenzyme 1 OS=Sus scrofa OX=9823 GN=AK1 PE=3 SV=2	AK1	1	2.56042e-07	155.8	2	IIFVVGGPGSGK(1)GTQCEK	0.2788	1.22451	1.03596	2.19304		0.204348	0.342141	cytoplasm	K00939	adk, AK; adenylate kinase [EC:2.7.4.3]	map00230 Purine metabolism; map00730 Thiamine metabolism; map01100 Metabolic pathways	GO:0006139 nucleobase-containing compound metabolic process; GO:0006163 purine nucleotide metabolic process; GO:0006164 purine nucleotide biosynthetic process; GO:0006165 nucleoside diphosphate phosphorylation; GO:0006172 ADP biosynthetic process; GO:0006725 cellular aromatic compound metabolic process; GO:0006753 nucleoside phosphate metabolic process; GO:0006793 phosphorus metabolic process; GO…	GO:0001520 outer dense fiber; GO:0005622 intracellular; GO:0005623 cell; GO:0005737 cytoplasm; GO:0005829 cytosol; GO:0005856 cytoskeleton; GO:0005886 plasma membrane; GO:0005929 cilium; GO:0016020 membrane; GO:0030016 myofibril; GO:0030017 sarcomere; GO:0031514 motile cilium; GO:0036126 sperm flagellum; GO:0042995 cell projection; GO:0043005 neuron projection; GO:0043226 organelle; GO:0043228 no…	GO:0003824 catalytic activity; GO:0004017 adenylate kinase activity; GO:0004550 nucleoside diphosphate kinase activity; GO:0016301 kinase activity; GO:0016740 transferase activity; GO:0016772 transferase activity, transferring phosphorus-containing groups; GO:0016776 phosphotransferase activity, phosphate group as acceptor; GO:0019205 nucleobase-containing compound kinase activity; GO:0050145 nuc…	PF00406	Adenylate kinase	F	KOG3079	Uridylate kinase/adenylate kinase
A0A286ZQ79	83	K	3.356	0.00718373	Up	Adenylate kinase isoenzyme 1 OS=Sus scrofa OX=9823 GN=AK1 PE=3 SV=2	AK1	1	5.39117e-06	201	2	SK(1)IIFVVGGPGSGK	-0.43181	1.25426	1.2372	2.13102	0.58868	0.342975	0.445864	cytoplasm	K00939	adk, AK; adenylate kinase [EC:2.7.4.3]	map00230 Purine metabolism; map00730 Thiamine metabolism; map01100 Metabolic pathways	GO:0006139 nucleobase-containing compound metabolic process; GO:0006163 purine nucleotide metabolic process; GO:0006164 purine nucleotide biosynthetic process; GO:0006165 nucleoside diphosphate phosphorylation; GO:0006172 ADP biosynthetic process; GO:0006725 cellular aromatic compound metabolic process; GO:0006753 nucleoside phosphate metabolic process; GO:0006793 phosphorus metabolic process; GO…	GO:0001520 outer dense fiber; GO:0005622 intracellular; GO:0005623 cell; GO:0005737 cytoplasm; GO:0005829 cytosol; GO:0005856 cytoskeleton; GO:0005886 plasma membrane; GO:0005929 cilium; GO:0016020 membrane; GO:0030016 myofibril; GO:0030017 sarcomere; GO:0031514 motile cilium; GO:0036126 sperm flagellum; GO:0042995 cell projection; GO:0043005 neuron projection; GO:0043226 organelle; GO:0043228 no…	GO:0003824 catalytic activity; GO:0004017 adenylate kinase activity; GO:0004550 nucleoside diphosphate kinase activity; GO:0016301 kinase activity; GO:0016740 transferase activity; GO:0016772 transferase activity, transferring phosphorus-containing groups; GO:0016776 phosphotransferase activity, phosphate group as acceptor; GO:0019205 nucleobase-containing compound kinase activity; GO:0050145 nuc…	PF00406	Adenylate kinase	F	KOG3079	Uridylate kinase/adenylate kinase
A0A286ZQW4	853	K	9.764	0.0495857	Up	Nucleoporin 210 like OS=Sus scrofa OX=9823 GN=NUP210L PE=3 SV=2	NUP210L	1	0.000113762	134.49	3	LHGHQILK(1)VHQIK	-1.4906	1.10133		2.52707		0.2418	0.129798	plasma membrane	K14314	NUP210, GP210; nuclear pore complex protein Nup210	map03013 RNA transport	GO:0000003 reproduction; GO:0002064 epithelial cell development; GO:0003006 developmental process involved in reproduction; GO:0007275 multicellular organism development; GO:0007276 gamete generation; GO:0007281 germ cell development; GO:0007283 spermatogenesis; GO:0007286 spermatid development; GO:0007548 sex differentiation; GO:0008406 gonad development; GO:0008584 male gonad development; GO:00…			PF02368	Bacterial Ig-like domain (group 2)	UY	KOG1833	Nuclear pore complex, gp210 component
A0A286ZQY6	202	K	16.56	6.83693e-05	Up	Isocitrate dehydrogenase [NAD] subunit, mitochondrial OS=Sus scrofa OX=9823 GN=IDH3A PE=1 SV=2	IDH3A	1	0.000775515	131.5	2	EVAENCK(1)DIK	-0.057496	1.66054	1.51005	2.48772	0.124701	0.102941	0.11405	cytoplasm	K00030	IDH3; isocitrate dehydrogenase (NAD+) [EC:1.1.1.41]	map00020 Citrate cycle (TCA cycle); map01100 Metabolic pathways; map01200 Carbon metabolism; map01210 2-Oxocarboxylic acid metabolism; map01230 Biosynthesis of amino acids	GO:0005975 carbohydrate metabolic process; GO:0006082 organic acid metabolic process; GO:0006091 generation of precursor metabolites and energy; GO:0006099 tricarboxylic acid cycle; GO:0006101 citrate metabolic process; GO:0006102 isocitrate metabolic process; GO:0006103 2-oxoglutarate metabolic process; GO:0006139 nucleobase-containing compound metabolic process; GO:0006725 cellular aromatic com…	GO:0005622 intracellular; GO:0005623 cell; GO:0005737 cytoplasm; GO:0005739 mitochondrion; GO:0005759 mitochondrial matrix; GO:0005962 mitochondrial isocitrate dehydrogenase complex (NAD+); GO:0030062 mitochondrial tricarboxylic acid cycle enzyme complex; GO:0031974 membrane-enclosed lumen; GO:0032991 protein-containing complex; GO:0043209 myelin sheath; GO:0043226 organelle; GO:0043227 membrane-…	GO:0000287 magnesium ion binding; GO:0003824 catalytic activity; GO:0004448 isocitrate dehydrogenase activity; GO:0004449 isocitrate dehydrogenase (NAD+) activity; GO:0005488 binding; GO:0016491 oxidoreductase activity; GO:0016614 oxidoreductase activity, acting on CH-OH group of donors; GO:0016616 oxidoreductase activity, acting on the CH-OH group of donors, NAD or NADP as acceptor; GO:0043167 i…	PF00180	Isocitrate/isopropylmalate dehydrogenase	E	KOG0785	Isocitrate dehydrogenase, alpha subunit
A0A286ZQY6	156	K	10.595	3.43544e-05	Up	Isocitrate dehydrogenase [NAD] subunit, mitochondrial OS=Sus scrofa OX=9823 GN=IDH3A PE=1 SV=2	IDH3A	1	0.000196834	185.84	2	LITEGASK(1)R	0.14564	1.60615	2.18565	1.69073	0.188416	0.151315	0.177734	cytoplasm	K00030	IDH3; isocitrate dehydrogenase (NAD+) [EC:1.1.1.41]	map00020 Citrate cycle (TCA cycle); map01100 Metabolic pathways; map01200 Carbon metabolism; map01210 2-Oxocarboxylic acid metabolism; map01230 Biosynthesis of amino acids	GO:0005975 carbohydrate metabolic process; GO:0006082 organic acid metabolic process; GO:0006091 generation of precursor metabolites and energy; GO:0006099 tricarboxylic acid cycle; GO:0006101 citrate metabolic process; GO:0006102 isocitrate metabolic process; GO:0006103 2-oxoglutarate metabolic process; GO:0006139 nucleobase-containing compound metabolic process; GO:0006725 cellular aromatic com…	GO:0005622 intracellular; GO:0005623 cell; GO:0005737 cytoplasm; GO:0005739 mitochondrion; GO:0005759 mitochondrial matrix; GO:0005962 mitochondrial isocitrate dehydrogenase complex (NAD+); GO:0030062 mitochondrial tricarboxylic acid cycle enzyme complex; GO:0031974 membrane-enclosed lumen; GO:0032991 protein-containing complex; GO:0043209 myelin sheath; GO:0043226 organelle; GO:0043227 membrane-…	GO:0000287 magnesium ion binding; GO:0003824 catalytic activity; GO:0004448 isocitrate dehydrogenase activity; GO:0004449 isocitrate dehydrogenase (NAD+) activity; GO:0005488 binding; GO:0016491 oxidoreductase activity; GO:0016614 oxidoreductase activity, acting on CH-OH group of donors; GO:0016616 oxidoreductase activity, acting on the CH-OH group of donors, NAD or NADP as acceptor; GO:0043167 i…	PF00180	Isocitrate/isopropylmalate dehydrogenase	E	KOG0785	Isocitrate dehydrogenase, alpha subunit
A0A287A9Z2	104	K	16.739	0.000533882	Up	L-2-hydroxyglutarate dehydrogenase OS=Sus scrofa OX=9823 GN=L2HGDH PE=1 SV=1	L2HGDH	1	2.50971e-67	320.8	4	DLAIHQTGHNSGVIHSGIYYK(1)PESLK	0.66103	1.10728	1.88373	2.67075	0.133997	0.097687	0.106546	mitochondria	K00109	L2HGDH; 2-hydroxyglutarate dehydrogenase [EC:1.1.99.2]	map00650 Butanoate metabolism; map01100 Metabolic pathways	GO:0006807 nitrogen compound metabolic process; GO:0008152 metabolic process; GO:0009987 cellular process; GO:0019538 protein metabolic process; GO:0043170 macromolecule metabolic process; GO:0044237 cellular metabolic process; GO:0044238 primary metabolic process; GO:0044260 cellular macromolecule metabolic process; GO:0044267 cellular protein metabolic process; GO:0055114 oxidation-reduction pr…	GO:0016020 membrane; GO:0016021 integral component of membrane; GO:0031224 intrinsic component of membrane;	GO:0003824 catalytic activity; GO:0016491 oxidoreductase activity; GO:0016614 oxidoreductase activity, acting on CH-OH group of donors; GO:0047545 2-hydroxyglutarate dehydrogenase activity;	PF01266	FAD dependent oxidoreductase	S	KOG2665	Predicted FAD-dependent oxidoreductase
A0A287A9Z2	173	K	17.25	0.00134609	Up	L-2-hydroxyglutarate dehydrogenase OS=Sus scrofa OX=9823 GN=L2HGDH PE=1 SV=1	L2HGDH	1	0.000301467	152.47	2	LIQQEDIK(1)K	-0.70815	1.28527	1.45813	2.07055		0.112669	0.0733745	mitochondria	K00109	L2HGDH; 2-hydroxyglutarate dehydrogenase [EC:1.1.99.2]	map00650 Butanoate metabolism; map01100 Metabolic pathways	GO:0006807 nitrogen compound metabolic process; GO:0008152 metabolic process; GO:0009987 cellular process; GO:0019538 protein metabolic process; GO:0043170 macromolecule metabolic process; GO:0044237 cellular metabolic process; GO:0044238 primary metabolic process; GO:0044260 cellular macromolecule metabolic process; GO:0044267 cellular protein metabolic process; GO:0055114 oxidation-reduction pr…	GO:0016020 membrane; GO:0016021 integral component of membrane; GO:0031224 intrinsic component of membrane;	GO:0003824 catalytic activity; GO:0016491 oxidoreductase activity; GO:0016614 oxidoreductase activity, acting on CH-OH group of donors; GO:0047545 2-hydroxyglutarate dehydrogenase activity;	PF01266	FAD dependent oxidoreductase	S	KOG2665	Predicted FAD-dependent oxidoreductase
F1S0P1	397	K	19.89	0.00633279	Up	Regulator of G protein signaling 22 OS=Sus scrofa OX=9823 GN=RGS22 PE=4 SV=4	RGS22	1	7.19354e-22	259.51	2	ADWCISHK(1)TYDIGNR	0.23236	1.59603	1.09756	3.01919	0.193129	0.0313099	0.062779	nucleus				GO:0043085 positive regulation of catalytic activity; GO:0043087 regulation of GTPase activity; GO:0043547 positive regulation of GTPase activity; GO:0044093 positive regulation of molecular function; GO:0050790 regulation of catalytic activity; GO:0051336 regulation of hydrolase activity; GO:0051345 positive regulation of hydrolase activity; GO:0065007 biological regulation; GO:0065009 regulatio…	GO:0005622 intracellular; GO:0005623 cell; GO:0005737 cytoplasm; GO:0005886 plasma membrane; GO:0016020 membrane; GO:0071944 cell periphery;	GO:0005096 GTPase activator activity; GO:0008047 enzyme activator activity; GO:0030234 enzyme regulator activity; GO:0030695 GTPase regulator activity; GO:0060589 nucleoside-triphosphatase regulator activity; GO:0098772 molecular function regulator;	PF00615	Regulator of G protein signaling domain
A0A286ZRC3	186	K	6.074	0.000724673	Up	Carnitine O-acetyltransferase OS=Sus scrofa OX=9823 GN=CRAT PE=1 SV=1	CRAT	1	2.05201e-09	228.61	2	VPGPK(1)QDSVTNFSK	0.72947	1.14909	1.98284	2.01991	0.296328	0.260339	0.291498	cytoplasm,nucleus	K00624	E2.3.1.7; carnitine O-acetyltransferase [EC:2.3.1.7]	map04146 Peroxisome	GO:0006082 organic acid metabolic process; GO:0006575 cellular modified amino acid metabolic process; GO:0006577 amino-acid betaine metabolic process; GO:0006605 protein targeting; GO:0006625 protein targeting to peroxisome; GO:0006629 lipid metabolic process; GO:0006631 fatty acid metabolic process; GO:0006635 fatty acid beta-oxidation; GO:0006807 nitrogen compound metabolic process; GO:0006810 …	GO:0005622 intracellular; GO:0005623 cell; GO:0005737 cytoplasm; GO:0005739 mitochondrion; GO:0005777 peroxisome; GO:0005782 peroxisomal matrix; GO:0005783 endoplasmic reticulum; GO:0005829 cytosol; GO:0012505 endomembrane system; GO:0031907 microbody lumen; GO:0031974 membrane-enclosed lumen; GO:0042579 microbody; GO:0043226 organelle; GO:0043227 membrane-bounded organelle; GO:0043229 intracellu…	GO:0003824 catalytic activity; GO:0004092 carnitine O-acetyltransferase activity; GO:0005102 signaling receptor binding; GO:0005488 binding; GO:0005515 protein binding; GO:0008374 O-acyltransferase activity; GO:0016406 carnitine O-acyltransferase activity; GO:0016407 acetyltransferase activity; GO:0016413 O-acetyltransferase activity; GO:0016740 transferase activity; GO:0016746 transferase activi…			I	KOG3717	Carnitine O-acyltransferase CRAT
I3LCP8	136	K	3.128	0.0429323	Up	Serpin family B member 6 OS=Sus scrofa OX=9823 GN=SERPINB6 PE=1 SV=3	SERPINB6	1	0.0205188	72.365	3	K(1)HINTWVAQK	-0.011128	1.14053	1.46787	1.51328	0.629884		0.248442	cytoplasm	K13963	SERPINB; serpin B	map05146 Amoebiasis	GO:0009892 negative regulation of metabolic process; GO:0010466 negative regulation of peptidase activity; GO:0010605 negative regulation of macromolecule metabolic process; GO:0010951 negative regulation of endopeptidase activity; GO:0019222 regulation of metabolic process; GO:0030162 regulation of proteolysis; GO:0031323 regulation of cellular metabolic process; GO:0031324 negative regulation o…	GO:0005576 extracellular region; GO:0005615 extracellular space; GO:0005622 intracellular; GO:0005623 cell; GO:0005737 cytoplasm;	GO:0004857 enzyme inhibitor activity; GO:0004866 endopeptidase inhibitor activity; GO:0004867 serine-type endopeptidase inhibitor activity; GO:0030234 enzyme regulator activity; GO:0030414 peptidase inhibitor activity; GO:0061134 peptidase regulator activity; GO:0061135 endopeptidase regulator activity; GO:0098772 molecular function regulator;	PF00079	Serpin (serine protease inhibitor)	V	KOG2392	Serpin
F1RXT0	104	K	11.661	0.00395562	Up	Ferritin OS=Sus scrofa OX=9823 PE=3 SV=2	--	1	0.00462415	100.55	2	ALQCALHLEK(1)R	-1.1444	1.28898	1.12432	2.31632		0.120032	0.150354	extracellular	K00522	FTH1; ferritin heavy chain [EC:1.16.3.2]	map04216 Ferroptosis; map04217 Necroptosis; map04978 Mineral absorption				PF00210	Ferritin-like domain	P	KOG2332	Ferritin
A0A286ZRL1	207	K	21.097	0.000452525	Up	ATP-dependent Clp protease proteolytic subunit OS=Sus scrofa OX=9823 GN=CLPP PE=1 SV=1	CLPP	1	0.000871267	188.49	2	QLYSIYAK(1)HTK	-0.52009	1.3331	1.57333	1.94041	0.0881838	0.0649798		mitochondria	K01358	clpP, CLPP; ATP-dependent Clp protease, protease subunit [EC:3.4.21.92]	map04212 Longevity regulating pathway - worm	GO:0006508 proteolysis; GO:0006515 protein quality control for misfolded or incompletely synthesized proteins; GO:0006807 nitrogen compound metabolic process; GO:0008152 metabolic process; GO:0009056 catabolic process; GO:0009057 macromolecule catabolic process; GO:0009987 cellular process; GO:0016043 cellular component organization; GO:0019538 protein metabolic process; GO:0022607 cellular compo…	GO:0005622 intracellular; GO:0005623 cell; GO:0005737 cytoplasm; GO:0005739 mitochondrion; GO:0005759 mitochondrial matrix; GO:0009368 endopeptidase Clp complex; GO:0031974 membrane-enclosed lumen; GO:0032991 protein-containing complex; GO:0043226 organelle; GO:0043227 membrane-bounded organelle; GO:0043229 intracellular organelle; GO:0043231 intracellular membrane-bounded organelle; GO:0043233 o…	GO:0003824 catalytic activity; GO:0004175 endopeptidase activity; GO:0004252 serine-type endopeptidase activity; GO:0005488 binding; GO:0005515 protein binding; GO:0008233 peptidase activity; GO:0008236 serine-type peptidase activity; GO:0016787 hydrolase activity; GO:0017171 serine hydrolase activity; GO:0042802 identical protein binding; GO:0070011 peptidase activity, acting on L-amino acid pep…	PF00574	Clp protease	O	KOG0840	ATP-dependent Clp protease, proteolytic subunit
A0A480XNH5	163	K	24.841	0.00190662	Up	Mono-ADP ribosylhydrolase 1 OS=Sus scrofa OX=9823 GN=MACROD1 PE=1 SV=1	MACROD1	1	3.93017e-76	327.06	3	GDITK(1)LEVDAIVNAANSSLLGGGGVDGCIHR	0.072725	2.06286	1.75859	1.04787	0.0516629	0.0790192		mitochondria	K23518	MACROD, ymdB; O-acetyl-ADP-ribose deacetylase [EC:3.1.1.106]		GO:0006139 nucleobase-containing compound metabolic process; GO:0006464 cellular protein modification process; GO:0006725 cellular aromatic compound metabolic process; GO:0006807 nitrogen compound metabolic process; GO:0006950 response to stress; GO:0006974 cellular response to DNA damage stimulus; GO:0008152 metabolic process; GO:0009116 nucleoside metabolic process; GO:0009987 cellular process;…	GO:0005622 intracellular; GO:0005623 cell; GO:0005634 nucleus; GO:0005654 nucleoplasm; GO:0031974 membrane-enclosed lumen; GO:0031981 nuclear lumen; GO:0043226 organelle; GO:0043227 membrane-bounded organelle; GO:0043229 intracellular organelle; GO:0043231 intracellular membrane-bounded organelle; GO:0043233 organelle lumen; GO:0070013 intracellular organelle lumen;	GO:0003824 catalytic activity; GO:0016787 hydrolase activity; GO:0016798 hydrolase activity, acting on glycosyl bonds; GO:0019213 deacetylase activity;	PF01661	Macro domain	BK	KOG2633	Hismacro and SEC14 domain-containing proteins
A0A480XNH5	103	K	10.383	0.00824044	Up	Mono-ADP ribosylhydrolase 1 OS=Sus scrofa OX=9823 GN=MACROD1 PE=1 SV=1	MACROD1	1	0.0131817	96.331	2	SFLK(1)GLSDK	0.15439	1.40703	2.00578	2.06008	0.370312	0.0874932	0.0693078	mitochondria	K23518	MACROD, ymdB; O-acetyl-ADP-ribose deacetylase [EC:3.1.1.106]		GO:0006139 nucleobase-containing compound metabolic process; GO:0006464 cellular protein modification process; GO:0006725 cellular aromatic compound metabolic process; GO:0006807 nitrogen compound metabolic process; GO:0006950 response to stress; GO:0006974 cellular response to DNA damage stimulus; GO:0008152 metabolic process; GO:0009116 nucleoside metabolic process; GO:0009987 cellular process;…	GO:0005622 intracellular; GO:0005623 cell; GO:0005634 nucleus; GO:0005654 nucleoplasm; GO:0031974 membrane-enclosed lumen; GO:0031981 nuclear lumen; GO:0043226 organelle; GO:0043227 membrane-bounded organelle; GO:0043229 intracellular organelle; GO:0043231 intracellular membrane-bounded organelle; GO:0043233 organelle lumen; GO:0070013 intracellular organelle lumen;	GO:0003824 catalytic activity; GO:0016787 hydrolase activity; GO:0016798 hydrolase activity, acting on glycosyl bonds; GO:0019213 deacetylase activity;	PF01661	Macro domain	BK	KOG2633	Hismacro and SEC14 domain-containing proteins
F1SHG7	250	K	13.864	0.00314805	Up	Nucleotide binding protein like OS=Sus scrofa OX=9823 GN=NUBPL PE=3 SV=4	NUBPL	1	0.01726	69.815	3	HK(1)THIFGADGAR	0.73524	1.72081		2.01008		0.15144	0.117673	mitochondria	K03593	mrp, NUBPL; ATP-binding protein involved in chromosome partitioning		GO:0006996 organelle organization; GO:0007005 mitochondrion organization; GO:0009653 anatomical structure morphogenesis; GO:0009987 cellular process; GO:0010257 NADH dehydrogenase complex assembly; GO:0016043 cellular component organization; GO:0022607 cellular component assembly; GO:0032502 developmental process; GO:0032981 mitochondrial respiratory chain complex I assembly; GO:0032989 cellular …	GO:0005622 intracellular; GO:0005623 cell; GO:0005737 cytoplasm; GO:0005739 mitochondrion; GO:0005759 mitochondrial matrix; GO:0005886 plasma membrane; GO:0016020 membrane; GO:0031974 membrane-enclosed lumen; GO:0043226 organelle; GO:0043227 membrane-bounded organelle; GO:0043229 intracellular organelle; GO:0043231 intracellular membrane-bounded organelle; GO:0043233 organelle lumen; GO:0070013 i…	GO:0005488 binding; GO:0048037 cofactor binding; GO:0051536 iron-sulfur cluster binding; GO:0051539 4 iron, 4 sulfur cluster binding; GO:0051540 metal cluster binding;			D	KOG3022	Predicted ATPase, nucleotide-binding
A0A286ZX04	118	K	3.844	0.0120218	Up	ATP synthase subunit s, mitochondrial OS=Sus scrofa OX=9823 GN=DMAC2L PE=1 SV=1	DMAC2L	1	2.52744e-05	139.42	3	FCK(1)CHYIEDYCLER	-0.82746	1.11346	2.2252	1.4226	0.524335	0.468113	0.2463	cytoplasm	K07554	ATPeF0S, ATP5S; ATP synthase, H+ transporting, mitochondrial F0 complex, subunit s		GO:0006139 nucleobase-containing compound metabolic process; GO:0006163 purine nucleotide metabolic process; GO:0006164 purine nucleotide biosynthetic process; GO:0006725 cellular aromatic compound metabolic process; GO:0006753 nucleoside phosphate metabolic process; GO:0006754 ATP biosynthetic process; GO:0006793 phosphorus metabolic process; GO:0006796 phosphate-containing compound metabolic pr…	GO:0005622 intracellular; GO:0005623 cell; GO:0005737 cytoplasm; GO:0005739 mitochondrion; GO:0005740 mitochondrial envelope; GO:0005743 mitochondrial inner membrane; GO:0016020 membrane; GO:0019866 organelle inner membrane; GO:0031090 organelle membrane; GO:0031966 mitochondrial membrane; GO:0031967 organelle envelope; GO:0031975 envelope; GO:0043226 organelle; GO:0043227 membrane-bounded organe…	GO:0005215 transporter activity; GO:0008324 cation transmembrane transporter activity; GO:0015075 ion transmembrane transporter activity; GO:0015077 monovalent inorganic cation transmembrane transporter activity; GO:0015078 proton transmembrane transporter activity; GO:0015318 inorganic molecular entity transmembrane transporter activity; GO:0022857 transmembrane transporter activity; GO:0022890 …			C	KOG3864	Uncharacterized conserved protein
A0A286ZS14	231	K	9.57	0.0127889	Up	Sodium/potassium-transporting ATPase subunit beta OS=Sus scrofa OX=9823 GN=ATP1B3 PE=1 SV=1	ATP1B3	1	0.0124418	97.798	2	VAFK(1)VTVHA	0.11535	1.03511	1.2241	2.41518	0.216186	0.109428		cytoplasm	K01540	ATP1B, CD298; sodium/potassium-transporting ATPase subunit beta	map04022 cGMP-PKG signaling pathway; map04024 cAMP signaling pathway; map04260 Cardiac muscle contraction; map04261 Adrenergic signaling in cardiomyocytes; map04911 Insulin secretion; map04918 Thyroid hormone synthesis; map04919 Thyroid hormone signaling pathway; map04925 Aldosterone synthesis and secretion; map04960 Aldosterone-regulated sodium reabsorption; map04961 Endocrine and other factor-r…	GO:0002028 regulation of sodium ion transport; GO:0002376 immune system process; GO:0006810 transport; GO:0006811 ion transport; GO:0006812 cation transport; GO:0006813 potassium ion transport; GO:0006814 sodium ion transport; GO:0006873 cellular ion homeostasis; GO:0006875 cellular metal ion homeostasis; GO:0006883 cellular sodium ion homeostasis; GO:0006928 movement of cell or subcellular compo…	GO:0005622 intracellular; GO:0005623 cell; GO:0005737 cytoplasm; GO:0005886 plasma membrane; GO:0005887 integral component of plasma membrane; GO:0005890 sodium:potassium-exchanging ATPase complex; GO:0005901 caveola; GO:0016020 membrane; GO:0016021 integral component of membrane; GO:0031224 intrinsic component of membrane; GO:0031226 intrinsic component of plasma membrane; GO:0032991 protein-con…	GO:0001671 ATPase activator activity; GO:0003824 catalytic activity; GO:0005215 transporter activity; GO:0005391 sodium:potassium-exchanging ATPase activity; GO:0005488 binding; GO:0005515 protein binding; GO:0008047 enzyme activator activity; GO:0008324 cation transmembrane transporter activity; GO:0008556 potassium transmembrane transporter activity, phosphorylative mechanism; GO:0015075 ion tr…			P	KOG3927	Na+/K+ ATPase, beta subunit
P03974	565	K	3.039	0.0249502	Up	Transitional endoplasmic reticulum ATPase OS=Sus scrofa OX=9823 GN=VCP PE=1 SV=5	VCP	1	0.0175941	119.57	2	EIFDK(1)AR	-0.40488	1.60489	1.19129	1.71841	0.814858	0.404479	0.266073	cytoplasm,nucleus	K13525	VCP, CDC48; transitional endoplasmic reticulum ATPase	map04141 Protein processing in endoplasmic reticulum; map05134 Legionellosis	GO:0000731 DNA synthesis involved in DNA repair; GO:0001775 cell activation; GO:0002082 regulation of oxidative phosphorylation; GO:0002252 immune effector process; GO:0002263 cell activation involved in immune response; GO:0002274 myeloid leukocyte activation; GO:0002275 myeloid cell activation involved in immune response; GO:0002283 neutrophil activation involved in immune response; GO:0002366 …	GO:0000323 lytic vacuole; GO:0000502 proteasome complex; GO:0005576 extracellular region; GO:0005622 intracellular; GO:0005623 cell; GO:0005634 nucleus; GO:0005654 nucleoplasm; GO:0005694 chromosome; GO:0005737 cytoplasm; GO:0005764 lysosome; GO:0005766 primary lysosome; GO:0005773 vacuole; GO:0005775 vacuolar lumen; GO:0005783 endoplasmic reticulum; GO:0005789 endoplasmic reticulum membrane; GO:…	GO:0000166 nucleotide binding; GO:0002020 protease binding; GO:0003824 catalytic activity; GO:0005102 signaling receptor binding; GO:0005488 binding; GO:0005515 protein binding; GO:0005524 ATP binding; GO:0008047 enzyme activator activity; GO:0008144 drug binding; GO:0016462 pyrophosphatase activity; GO:0016504 peptidase activator activity; GO:0016787 hydrolase activity; GO:0016817 hydrolase acti…	PF02359; PF02933; PF00004; PF09336	Cell division protein 48 (CDC48), N-terminal domain; Cell division protein 48 (CDC48), domain 2; ATPase family associated with various cellular activities (AAA); Vps4 C terminal oligomerisation domain	O	KOG0730	AAA+-type ATPase
P03974	524	K	5.143	0.0169195	Up	Transitional endoplasmic reticulum ATPase OS=Sus scrofa OX=9823 GN=VCP PE=1 SV=5	VCP	1	0.000261846	118.88	2	GVLFYGPPGCGK(1)TLLAK	-0.44957	1.31903	1.06889	2.63532	0.538068	0.259644	0.179049	cytoplasm,nucleus	K13525	VCP, CDC48; transitional endoplasmic reticulum ATPase	map04141 Protein processing in endoplasmic reticulum; map05134 Legionellosis	GO:0000731 DNA synthesis involved in DNA repair; GO:0001775 cell activation; GO:0002082 regulation of oxidative phosphorylation; GO:0002252 immune effector process; GO:0002263 cell activation involved in immune response; GO:0002274 myeloid leukocyte activation; GO:0002275 myeloid cell activation involved in immune response; GO:0002283 neutrophil activation involved in immune response; GO:0002366 …	GO:0000323 lytic vacuole; GO:0000502 proteasome complex; GO:0005576 extracellular region; GO:0005622 intracellular; GO:0005623 cell; GO:0005634 nucleus; GO:0005654 nucleoplasm; GO:0005694 chromosome; GO:0005737 cytoplasm; GO:0005764 lysosome; GO:0005766 primary lysosome; GO:0005773 vacuole; GO:0005775 vacuolar lumen; GO:0005783 endoplasmic reticulum; GO:0005789 endoplasmic reticulum membrane; GO:…	GO:0000166 nucleotide binding; GO:0002020 protease binding; GO:0003824 catalytic activity; GO:0005102 signaling receptor binding; GO:0005488 binding; GO:0005515 protein binding; GO:0005524 ATP binding; GO:0008047 enzyme activator activity; GO:0008144 drug binding; GO:0016462 pyrophosphatase activity; GO:0016504 peptidase activator activity; GO:0016787 hydrolase activity; GO:0016817 hydrolase acti…	PF02359; PF02933; PF00004; PF09336	Cell division protein 48 (CDC48), N-terminal domain; Cell division protein 48 (CDC48), domain 2; ATPase family associated with various cellular activities (AAA); Vps4 C terminal oligomerisation domain	O	KOG0730	AAA+-type ATPase
P03974	231	K	1.679	0.0168591	Up	Transitional endoplasmic reticulum ATPase OS=Sus scrofa OX=9823 GN=VCP PE=1 SV=5	VCP	1	0.00013247	126.83	3	HPALFK(1)AIGVKPPR	-0.38984	1.15086	1.15142	1.45769	0.897023	0.621327	0.721685	cytoplasm,nucleus	K13525	VCP, CDC48; transitional endoplasmic reticulum ATPase	map04141 Protein processing in endoplasmic reticulum; map05134 Legionellosis	GO:0000731 DNA synthesis involved in DNA repair; GO:0001775 cell activation; GO:0002082 regulation of oxidative phosphorylation; GO:0002252 immune effector process; GO:0002263 cell activation involved in immune response; GO:0002274 myeloid leukocyte activation; GO:0002275 myeloid cell activation involved in immune response; GO:0002283 neutrophil activation involved in immune response; GO:0002366 …	GO:0000323 lytic vacuole; GO:0000502 proteasome complex; GO:0005576 extracellular region; GO:0005622 intracellular; GO:0005623 cell; GO:0005634 nucleus; GO:0005654 nucleoplasm; GO:0005694 chromosome; GO:0005737 cytoplasm; GO:0005764 lysosome; GO:0005766 primary lysosome; GO:0005773 vacuole; GO:0005775 vacuolar lumen; GO:0005783 endoplasmic reticulum; GO:0005789 endoplasmic reticulum membrane; GO:…	GO:0000166 nucleotide binding; GO:0002020 protease binding; GO:0003824 catalytic activity; GO:0005102 signaling receptor binding; GO:0005488 binding; GO:0005515 protein binding; GO:0005524 ATP binding; GO:0008047 enzyme activator activity; GO:0008144 drug binding; GO:0016462 pyrophosphatase activity; GO:0016504 peptidase activator activity; GO:0016787 hydrolase activity; GO:0016817 hydrolase acti…	PF02359; PF02933; PF00004; PF09336	Cell division protein 48 (CDC48), N-terminal domain; Cell division protein 48 (CDC48), domain 2; ATPase family associated with various cellular activities (AAA); Vps4 C terminal oligomerisation domain	O	KOG0730	AAA+-type ATPase
P03974	386	K	3.986	0.0447343	Up	Transitional endoplasmic reticulum ATPase OS=Sus scrofa OX=9823 GN=VCP PE=1 SV=5	VCP	1	1.16306e-05	211.63	2	LEILQIHTK(1)NMK	-0.019291	1.21171	0.811354	2.26043	0.385984		0.330514	cytoplasm,nucleus	K13525	VCP, CDC48; transitional endoplasmic reticulum ATPase	map04141 Protein processing in endoplasmic reticulum; map05134 Legionellosis	GO:0000731 DNA synthesis involved in DNA repair; GO:0001775 cell activation; GO:0002082 regulation of oxidative phosphorylation; GO:0002252 immune effector process; GO:0002263 cell activation involved in immune response; GO:0002274 myeloid leukocyte activation; GO:0002275 myeloid cell activation involved in immune response; GO:0002283 neutrophil activation involved in immune response; GO:0002366 …	GO:0000323 lytic vacuole; GO:0000502 proteasome complex; GO:0005576 extracellular region; GO:0005622 intracellular; GO:0005623 cell; GO:0005634 nucleus; GO:0005654 nucleoplasm; GO:0005694 chromosome; GO:0005737 cytoplasm; GO:0005764 lysosome; GO:0005766 primary lysosome; GO:0005773 vacuole; GO:0005775 vacuolar lumen; GO:0005783 endoplasmic reticulum; GO:0005789 endoplasmic reticulum membrane; GO:…	GO:0000166 nucleotide binding; GO:0002020 protease binding; GO:0003824 catalytic activity; GO:0005102 signaling receptor binding; GO:0005488 binding; GO:0005515 protein binding; GO:0005524 ATP binding; GO:0008047 enzyme activator activity; GO:0008144 drug binding; GO:0016462 pyrophosphatase activity; GO:0016504 peptidase activator activity; GO:0016787 hydrolase activity; GO:0016817 hydrolase acti…	PF02359; PF02933; PF00004; PF09336	Cell division protein 48 (CDC48), N-terminal domain; Cell division protein 48 (CDC48), domain 2; ATPase family associated with various cellular activities (AAA); Vps4 C terminal oligomerisation domain	O	KOG0730	AAA+-type ATPase
A0A5G2RC13	175	K	9.334	0.000674368	Up	Stomatin like 2 OS=Sus scrofa OX=9823 GN=STOML2 PE=1 SV=1	STOML2	1	0.000436852	132.32	2	ESAINVAEGK(1)K	1.0999	1.36438	2.53313	1.52188	0.216881	0.217543	0.146186	cytoplasm				GO:0001775 cell activation; GO:0001816 cytokine production; GO:0002253 activation of immune response; GO:0002376 immune system process; GO:0002429 immune response-activating cell surface receptor signaling pathway; GO:0002682 regulation of immune system process; GO:0002684 positive regulation of immune system process; GO:0002757 immune response-activating signal transduction; GO:0002764 immune re…	GO:0005622 intracellular; GO:0005623 cell; GO:0005737 cytoplasm; GO:0005739 mitochondrion; GO:0005740 mitochondrial envelope; GO:0005743 mitochondrial inner membrane; GO:0005758 mitochondrial intermembrane space; GO:0005856 cytoskeleton; GO:0005886 plasma membrane; GO:0016020 membrane; GO:0019866 organelle inner membrane; GO:0019897 extrinsic component of plasma membrane; GO:0019898 extrinsic com…	GO:0005102 signaling receptor binding; GO:0005488 binding; GO:0005515 protein binding; GO:0005543 phospholipid binding; GO:0008289 lipid binding; GO:0019899 enzyme binding; GO:0043167 ion binding; GO:0043168 anion binding; GO:0051020 GTPase binding; GO:1901611 phosphatidylglycerol binding; GO:1901612 cardiolipin binding;			C	KOG2620	Prohibitins and stomatins of the PID superfamily
A0A286ZSD9	116	K	0.009	0.00049741	Down	BHLH domain-containing protein OS=Sus scrofa OX=9823 GN=MXD3 PE=4 SV=1	MXD3	1	0.0161314	56.094	2	SK(1)QQSLRQQLEQLR	-4.4444		0.0170555	0.0172503		1.77403	2.19166	nucleus	K09114	MXD, MAD; MAX dimerization protein		GO:0000122 negative regulation of transcription by RNA polymerase II; GO:0006355 regulation of transcription, DNA-templated; GO:0006357 regulation of transcription by RNA polymerase II; GO:0009889 regulation of biosynthetic process; GO:0009890 negative regulation of biosynthetic process; GO:0009892 negative regulation of metabolic process; GO:0010468 regulation of gene expression; GO:0010556 regu…	GO:0005622 intracellular; GO:0005623 cell; GO:0005634 nucleus; GO:0005667 transcription regulator complex; GO:0032991 protein-containing complex; GO:0043226 organelle; GO:0043227 membrane-bounded organelle; GO:0043229 intracellular organelle; GO:0043231 intracellular membrane-bounded organelle; GO:0090575 RNA polymerase II transcription regulator complex;	GO:0000981 DNA-binding transcription factor activity, RNA polymerase II-specific; GO:0003700 DNA-binding transcription factor activity; GO:0140110 transcription regulator activity;	PF00010	Helix-loop-helix DNA-binding domain	K	KOG2483	Upstream transcription factor 2/L-myc-2 protein
A0A286ZT13	192	K	0.013	0.00914343	Down	Albumin OS=Sus scrofa OX=9823 GN=ALB PE=1 SV=1	ALB	1	0.000621756	134.59	3	AACLLPK(1)IEHLREK	-1.0982	0.0328329		0.00953729	3.16829	0.795491	0.993854	cytoplasm	K16141	ALB; serum albumin	map04918 Thyroid hormone synthesis	GO:0001897 cytolysis by symbiont of host cells; GO:0001906 cell killing; GO:0001907 killing by symbiont of host cells; GO:0002576 platelet degranulation; GO:0003008 system process; GO:0003013 circulatory system process; GO:0003018 vascular process in circulatory system; GO:0006464 cellular protein modification process; GO:0006807 nitrogen compound metabolic process; GO:0006810 transport; GO:00068…	GO:0005576 extracellular region; GO:0005604 basement membrane; GO:0005615 extracellular space; GO:0005622 intracellular; GO:0005623 cell; GO:0005737 cytoplasm; GO:0005783 endoplasmic reticulum; GO:0005788 endoplasmic reticulum lumen; GO:0005794 Golgi apparatus; GO:0012505 endomembrane system; GO:0030141 secretory granule; GO:0031012 extracellular matrix; GO:0031091 platelet alpha granule; GO:0031…	GO:0003676 nucleic acid binding; GO:0003677 DNA binding; GO:0005488 binding; GO:0005504 fatty acid binding; GO:0005507 copper ion binding; GO:0005515 protein binding; GO:0008144 drug binding; GO:0008270 zinc ion binding; GO:0008289 lipid binding; GO:0015643 toxic substance binding; GO:0016209 antioxidant activity; GO:0019842 vitamin binding; GO:0019899 enzyme binding; GO:0030170 pyridoxal phospha…	PF00273	Serum albumin family
A0A286ZT13	16	K	0.024	0.00503073	Down	Albumin OS=Sus scrofa OX=9823 GN=ALB PE=1 SV=1	ALB	1	8.57205e-09	234.81	2	DTYK(1)SEIAHR	0.56825	0.0433421		0.0343906	2.73998	1.42337	0.758916	cytoplasm	K16141	ALB; serum albumin	map04918 Thyroid hormone synthesis	GO:0001897 cytolysis by symbiont of host cells; GO:0001906 cell killing; GO:0001907 killing by symbiont of host cells; GO:0002576 platelet degranulation; GO:0003008 system process; GO:0003013 circulatory system process; GO:0003018 vascular process in circulatory system; GO:0006464 cellular protein modification process; GO:0006807 nitrogen compound metabolic process; GO:0006810 transport; GO:00068…	GO:0005576 extracellular region; GO:0005604 basement membrane; GO:0005615 extracellular space; GO:0005622 intracellular; GO:0005623 cell; GO:0005737 cytoplasm; GO:0005783 endoplasmic reticulum; GO:0005788 endoplasmic reticulum lumen; GO:0005794 Golgi apparatus; GO:0012505 endomembrane system; GO:0030141 secretory granule; GO:0031012 extracellular matrix; GO:0031091 platelet alpha granule; GO:0031…	GO:0003676 nucleic acid binding; GO:0003677 DNA binding; GO:0005488 binding; GO:0005504 fatty acid binding; GO:0005507 copper ion binding; GO:0005515 protein binding; GO:0008144 drug binding; GO:0008270 zinc ion binding; GO:0008289 lipid binding; GO:0015643 toxic substance binding; GO:0016209 antioxidant activity; GO:0019842 vitamin binding; GO:0019899 enzyme binding; GO:0030170 pyridoxal phospha…	PF00273	Serum albumin family
A0A286ZT13	396	K	0.02	0.0265843	Down	Albumin OS=Sus scrofa OX=9823 GN=ALB PE=1 SV=1	ALB	1	5.92152e-05	148.56	2	FQPLVDEPK(1)NLIK	0.11395	0.0582831		0.00849589	3.41056	0.601367	0.921291	cytoplasm	K16141	ALB; serum albumin	map04918 Thyroid hormone synthesis	GO:0001897 cytolysis by symbiont of host cells; GO:0001906 cell killing; GO:0001907 killing by symbiont of host cells; GO:0002576 platelet degranulation; GO:0003008 system process; GO:0003013 circulatory system process; GO:0003018 vascular process in circulatory system; GO:0006464 cellular protein modification process; GO:0006807 nitrogen compound metabolic process; GO:0006810 transport; GO:00068…	GO:0005576 extracellular region; GO:0005604 basement membrane; GO:0005615 extracellular space; GO:0005622 intracellular; GO:0005623 cell; GO:0005737 cytoplasm; GO:0005783 endoplasmic reticulum; GO:0005788 endoplasmic reticulum lumen; GO:0005794 Golgi apparatus; GO:0012505 endomembrane system; GO:0030141 secretory granule; GO:0031012 extracellular matrix; GO:0031091 platelet alpha granule; GO:0031…	GO:0003676 nucleic acid binding; GO:0003677 DNA binding; GO:0005488 binding; GO:0005504 fatty acid binding; GO:0005507 copper ion binding; GO:0005515 protein binding; GO:0008144 drug binding; GO:0008270 zinc ion binding; GO:0008289 lipid binding; GO:0015643 toxic substance binding; GO:0016209 antioxidant activity; GO:0019842 vitamin binding; GO:0019899 enzyme binding; GO:0030170 pyridoxal phospha…	PF00273	Serum albumin family
Q68J42	161	K	2.321	0.018541	Up	Hormone-sensitive lipase OS=Sus scrofa OX=9823 GN=LIPE PE=2 SV=1	LIPE	1	6.32553e-06	208.63	2	EYVTLHK(1)GCFYGR	0.29565	1.42774	1.17911	1.58643	0.838196	0.402031	0.566489	nucleus	K07188	LIPE, HSL; hormone-sensitive lipase [EC:3.1.1.79]	map04024 cAMP signaling pathway; map04152 AMPK signaling pathway; map04371 Apelin signaling pathway; map04714 Thermogenesis; map04910 Insulin signaling pathway; map04923 Regulation of lipolysis in adipocytes; map04925 Aldosterone synthesis and secretion	GO:0000003 reproduction; GO:0001676 long-chain fatty acid metabolic process; GO:0006082 organic acid metabolic process; GO:0006139 nucleobase-containing compound metabolic process; GO:0006351 transcription, DNA-templated; GO:0006352 DNA-templated transcription, initiation; GO:0006353 DNA-templated transcription, termination; GO:0006360 transcription by RNA polymerase I; GO:0006361 transcription i…	GO:0005576 extracellular region; GO:0005615 extracellular space; GO:0005622 intracellular; GO:0005623 cell; GO:0005634 nucleus; GO:0005737 cytoplasm; GO:0005739 mitochondrion; GO:0005811 lipid droplet; GO:0005829 cytosol; GO:0005886 plasma membrane; GO:0005901 caveola; GO:0016020 membrane; GO:0043226 organelle; GO:0043227 membrane-bounded organelle; GO:0043228 non-membrane-bounded organelle; GO:0…	GO:0003676 nucleic acid binding; GO:0003723 RNA binding; GO:0003824 catalytic activity; GO:0004806 triglyceride lipase activity; GO:0005488 binding; GO:0005515 protein binding; GO:0016298 lipase activity; GO:0016787 hydrolase activity; GO:0016788 hydrolase activity, acting on ester bonds; GO:0017171 serine hydrolase activity; GO:0019843 rRNA binding; GO:0019899 enzyme binding; GO:0019900 kinase b…	PF07859	alpha/beta hydrolase fold	I	KOG4388	Hormone-sensitive lipase HSL
Q68J42	360	K	3.256	0.0248942	Up	Hormone-sensitive lipase OS=Sus scrofa OX=9823 GN=LIPE PE=2 SV=1	LIPE	1	0.000346868	83.362	4	SLVVHIHGGGFVAQTSK(1)SHEPYLK	0.99649	1.66335	0.790486	2.13638	0.540369	0.492024	0.377382	nucleus	K07188	LIPE, HSL; hormone-sensitive lipase [EC:3.1.1.79]	map04024 cAMP signaling pathway; map04152 AMPK signaling pathway; map04371 Apelin signaling pathway; map04714 Thermogenesis; map04910 Insulin signaling pathway; map04923 Regulation of lipolysis in adipocytes; map04925 Aldosterone synthesis and secretion	GO:0000003 reproduction; GO:0001676 long-chain fatty acid metabolic process; GO:0006082 organic acid metabolic process; GO:0006139 nucleobase-containing compound metabolic process; GO:0006351 transcription, DNA-templated; GO:0006352 DNA-templated transcription, initiation; GO:0006353 DNA-templated transcription, termination; GO:0006360 transcription by RNA polymerase I; GO:0006361 transcription i…	GO:0005576 extracellular region; GO:0005615 extracellular space; GO:0005622 intracellular; GO:0005623 cell; GO:0005634 nucleus; GO:0005737 cytoplasm; GO:0005739 mitochondrion; GO:0005811 lipid droplet; GO:0005829 cytosol; GO:0005886 plasma membrane; GO:0005901 caveola; GO:0016020 membrane; GO:0043226 organelle; GO:0043227 membrane-bounded organelle; GO:0043228 non-membrane-bounded organelle; GO:0…	GO:0003676 nucleic acid binding; GO:0003723 RNA binding; GO:0003824 catalytic activity; GO:0004806 triglyceride lipase activity; GO:0005488 binding; GO:0005515 protein binding; GO:0016298 lipase activity; GO:0016787 hydrolase activity; GO:0016788 hydrolase activity, acting on ester bonds; GO:0017171 serine hydrolase activity; GO:0019843 rRNA binding; GO:0019899 enzyme binding; GO:0019900 kinase b…	PF07859	alpha/beta hydrolase fold	I	KOG4388	Hormone-sensitive lipase HSL
A0A5G2Q9I2	319	K	1.834	0.0470523	Up	AAA domain-containing protein OS=Sus scrofa OX=9823 GN=PSMC3 PE=1 SV=1	PSMC3	1	0.000412284	137.95	2	ACAAQTK(1)ATFLK	-0.23983	1.1625	1.03178	1.68886	0.686499	0.902198	0.528165	mitochondria	K03065	PSMC3, RPT5; 26S proteasome regulatory subunit T5	map03050 Proteasome; map05169 Epstein-Barr virus infection	GO:0001775 cell activation; GO:0002252 immune effector process; GO:0002263 cell activation involved in immune response; GO:0002274 myeloid leukocyte activation; GO:0002275 myeloid cell activation involved in immune response; GO:0002283 neutrophil activation involved in immune response; GO:0002366 leukocyte activation involved in immune response; GO:0002376 immune system process; GO:0002443 leukoc…	GO:0000502 proteasome complex; GO:0000932 P-body; GO:0005576 extracellular region; GO:0005622 intracellular; GO:0005623 cell; GO:0005634 nucleus; GO:0005654 nucleoplasm; GO:0005737 cytoplasm; GO:0005829 cytosol; GO:0005838 proteasome regulatory particle; GO:0008540 proteasome regulatory particle, base subcomplex; GO:0012505 endomembrane system; GO:0022624 proteasome accessory complex; GO:0030141 …	GO:0003824 catalytic activity; GO:0005488 binding; GO:0005515 protein binding; GO:0008134 transcription factor binding; GO:0016462 pyrophosphatase activity; GO:0016787 hydrolase activity; GO:0016817 hydrolase activity, acting on acid anhydrides; GO:0016818 hydrolase activity, acting on acid anhydrides, in phosphorus-containing anhydrides; GO:0016887 ATPase activity; GO:0017025 TBP-class protein b…	PF00004	ATPase family associated with various cellular activities (AAA)	O	KOG0652	26S proteasome regulatory complex, ATPase RPT5
A0A286ZTB6	94	K	0.298	0.0450834	Down	NTR domain-containing protein OS=Sus scrofa OX=9823 GN=LOC110261265 PE=1 SV=1	LOC110261265	1	2.93242e-52	332.41	3	APQNVGK(1)IDHLYTPK	-0.49154	0.262695	0.406353	0.709421	2.53667	1.11748	0.967377	mitochondria	K16866	TIMP3; metalloproteinase inhibitor 3	map05205 Proteoglycans in cancer; map05206 MicroRNAs in cancer				PF00965	Tissue inhibitor of metalloproteinase	O	KOG4745	Metalloproteinase inhibitor TIMP and related proteins
A0A286ZTB6	149	K	0.19	0.0160429	Down	NTR domain-containing protein OS=Sus scrofa OX=9823 GN=LOC110261265 PE=1 SV=1	LOC110261265	1	0.0319218	100.67	2	EQK(1)LGFR	0.86687		0.206372	0.355332	2.13427	1.10302	1.20101	mitochondria	K16866	TIMP3; metalloproteinase inhibitor 3	map05205 Proteoglycans in cancer; map05206 MicroRNAs in cancer				PF00965	Tissue inhibitor of metalloproteinase	O	KOG4745	Metalloproteinase inhibitor TIMP and related proteins
A0A287AN65	570	K	4.004	0.0156051	Up	Exportin 1 OS=Sus scrofa OX=9823 GN=XPO1 PE=1 SV=2	XPO1	1	0.0111643	87.123	2	QLGSILK(1)TNVR	-0.097641	1.14087	1.63093	2.02919	0.680541	0.246364	0.27211	mitochondria	K14290	XPO1, CRM1; exportin-1	map03008 Ribosome biogenesis in eukaryotes; map03013 RNA transport; map04013 MAPK signaling pathway - fly; map05164 Influenza A; map05166 Human T-cell leukemia virus 1 infection	GO:0000054 ribosomal subunit export from nucleus; GO:0000055 ribosomal large subunit export from nucleus; GO:0000056 ribosomal small subunit export from nucleus; GO:0000122 negative regulation of transcription by RNA polymerase II; GO:0006355 regulation of transcription, DNA-templated; GO:0006357 regulation of transcription by RNA polymerase II; GO:0006403 RNA localization; GO:0006405 RNA export …	GO:0000775 chromosome, centromeric region; GO:0000776 kinetochore; GO:0005622 intracellular; GO:0005623 cell; GO:0005634 nucleus; GO:0005635 nuclear envelope; GO:0005642 annulate lamellae; GO:0005694 chromosome; GO:0005730 nucleolus; GO:0005737 cytoplasm; GO:0005829 cytosol; GO:0012505 endomembrane system; GO:0016020 membrane; GO:0031090 organelle membrane; GO:0031965 nuclear membrane; GO:0031967…	GO:0005049 nuclear export signal receptor activity; GO:0005215 transporter activity; GO:0005488 binding; GO:0005515 protein binding; GO:0019904 protein domain specific binding; GO:0140104 molecular carrier activity; GO:0140142 nucleocytoplasmic carrier activity;			UY	KOG2020	Nuclear transport receptor CRM1/MSN5 (importin beta superfamily)
A0A287AJV9	339	K	0.489	0.0155191	Down	Complement regulator factor H(predicted) OS=Sus scrofa OX=9823 GN=CFH PE=1 SV=1	CFH	1	0.000269182	156.75	2	K(1)YLQGETVR	1.3821	0.510647	0.717877		1.35806	1.28756	1.12586	extracellular	K04004	CFH, HF1; complement factor H	map04610 Complement and coagulation cascades; map05150 Staphylococcus aureus infection	GO:0002252 immune effector process; GO:0002253 activation of immune response; GO:0002376 immune system process; GO:0002673 regulation of acute inflammatory response; GO:0002682 regulation of immune system process; GO:0002684 positive regulation of immune system process; GO:0002697 regulation of immune effector process; GO:0002920 regulation of humoral immune response; GO:0006807 nitrogen compound…	GO:0005576 extracellular region; GO:0005615 extracellular space; GO:0005622 intracellular; GO:0005623 cell; GO:0005634 nucleus; GO:0005737 cytoplasm; GO:0005886 plasma membrane; GO:0016020 membrane; GO:0043226 organelle; GO:0043227 membrane-bounded organelle; GO:0043229 intracellular organelle; GO:0043231 intracellular membrane-bounded organelle; GO:0071944 cell periphery;	GO:0001846 opsonin binding; GO:0001848 complement binding; GO:0001851 complement component C3b binding; GO:0005488 binding; GO:0005515 protein binding; GO:0005539 glycosaminoglycan binding; GO:0008201 heparin binding; GO:0043167 ion binding; GO:0043168 anion binding; GO:0043394 proteoglycan binding; GO:0043395 heparan sulfate proteoglycan binding; GO:0097367 carbohydrate derivative binding; GO:19…	PF00084	Sushi domain (SCR repeat)
A0A286ZU97	324	K	129.618	0.000246858	Up	Mitochondrial carrier homolog 2 isoform 1(predicted) OS=Sus scrofa OX=9823 GN=MTCH2 PE=1 SV=2	MTCH2	1	4.59963e-05	195.83	3	VPFGK(1)TYCCDLR	-0.21547	1.27068	1.11096	3.57243	0.0124754	0.0158545	0.0176056	extracellular	K17885	MTCH; mitochondrial carrier		GO:0008104 protein localization; GO:0010941 regulation of cell death; GO:0010942 positive regulation of cell death; GO:0033036 macromolecule localization; GO:0033365 protein localization to organelle; GO:0034613 cellular protein localization; GO:0042981 regulation of apoptotic process; GO:0043065 positive regulation of apoptotic process; GO:0043067 regulation of programmed cell death; GO:0043068 …	GO:0005622 intracellular; GO:0005623 cell; GO:0005737 cytoplasm; GO:0005739 mitochondrion; GO:0016020 membrane; GO:0043226 organelle; GO:0043227 membrane-bounded organelle; GO:0043229 intracellular organelle; GO:0043231 intracellular membrane-bounded organelle;				C	KOG2745	Mitochondrial carrier protein
A0A287ACC3	285	K	3.237	0.0314652	Up	cAMP-dependent protein kinase OS=Sus scrofa OX=9823 GN=PRKACA PE=3 SV=2	PRKACA	1	0.000323795	185.58	2	NGVNDIK(1)NHK	-0.23876	1.87736	0.955176	1.75124	0.791623	0.286088	0.338512	cytoplasm	K04345	PKA; protein kinase A [EC:2.7.11.11]	map01522 Endocrine resistance; map04010 MAPK signaling pathway; map04014 Ras signaling pathway; map04020 Calcium signaling pathway; map04024 cAMP signaling pathway; map04062 Chemokine signaling pathway; map04114 Oocyte meiosis; map04140 Autophagy - animal; map04211 Longevity regulating pathway; map04213 Longevity regulating pathway - multiple species; map04261 Adrenergic signaling in cardiomyocyt…	GO:0001704 formation of primary germ layer; GO:0001707 mesoderm formation; GO:0006464 cellular protein modification process; GO:0006468 protein phosphorylation; GO:0006793 phosphorus metabolic process; GO:0006796 phosphate-containing compound metabolic process; GO:0006807 nitrogen compound metabolic process; GO:0006950 response to stress; GO:0007275 multicellular organism development; GO:0007369 …	GO:0001669 acrosomal vesicle; GO:0001674 female germ cell nucleus; GO:0005622 intracellular; GO:0005623 cell; GO:0005634 nucleus; GO:0005737 cytoplasm; GO:0005929 cilium; GO:0005952 cAMP-dependent protein kinase complex; GO:0012505 endomembrane system; GO:0030141 secretory granule; GO:0031410 cytoplasmic vesicle; GO:0031514 motile cilium; GO:0031594 neuromuscular junction; GO:0031982 vesicle; GO:…	GO:0003824 catalytic activity; GO:0004672 protein kinase activity; GO:0004674 protein serine/threonine kinase activity; GO:0004690 cyclic nucleotide-dependent protein kinase activity; GO:0004691 cAMP-dependent protein kinase activity; GO:0005488 binding; GO:0005515 protein binding; GO:0016301 kinase activity; GO:0016740 transferase activity; GO:0016772 transferase activity, transferring phosphoru…	PF00069	Protein kinase domain	T	KOG0616	cAMP-dependent protein kinase catalytic subunit (PKA)
A0A287ACC3	40	K	3.783	0.00651242	Up	cAMP-dependent protein kinase OS=Sus scrofa OX=9823 GN=PRKACA PE=3 SV=2	PRKACA	1	0.000201686	191.45	2	IK(1)TLGTGSFGR	0.11446	1.19139	1.29102	2.26314	0.539025	0.394771	0.320649	cytoplasm	K04345	PKA; protein kinase A [EC:2.7.11.11]	map01522 Endocrine resistance; map04010 MAPK signaling pathway; map04014 Ras signaling pathway; map04020 Calcium signaling pathway; map04024 cAMP signaling pathway; map04062 Chemokine signaling pathway; map04114 Oocyte meiosis; map04140 Autophagy - animal; map04211 Longevity regulating pathway; map04213 Longevity regulating pathway - multiple species; map04261 Adrenergic signaling in cardiomyocyt…	GO:0001704 formation of primary germ layer; GO:0001707 mesoderm formation; GO:0006464 cellular protein modification process; GO:0006468 protein phosphorylation; GO:0006793 phosphorus metabolic process; GO:0006796 phosphate-containing compound metabolic process; GO:0006807 nitrogen compound metabolic process; GO:0006950 response to stress; GO:0007275 multicellular organism development; GO:0007369 …	GO:0001669 acrosomal vesicle; GO:0001674 female germ cell nucleus; GO:0005622 intracellular; GO:0005623 cell; GO:0005634 nucleus; GO:0005737 cytoplasm; GO:0005929 cilium; GO:0005952 cAMP-dependent protein kinase complex; GO:0012505 endomembrane system; GO:0030141 secretory granule; GO:0031410 cytoplasmic vesicle; GO:0031514 motile cilium; GO:0031594 neuromuscular junction; GO:0031982 vesicle; GO:…	GO:0003824 catalytic activity; GO:0004672 protein kinase activity; GO:0004674 protein serine/threonine kinase activity; GO:0004690 cyclic nucleotide-dependent protein kinase activity; GO:0004691 cAMP-dependent protein kinase activity; GO:0005488 binding; GO:0005515 protein binding; GO:0016301 kinase activity; GO:0016740 transferase activity; GO:0016772 transferase activity, transferring phosphoru…	PF00069	Protein kinase domain	T	KOG0616	cAMP-dependent protein kinase catalytic subunit (PKA)
A0A287ACC3	247	K	2.569	0.048705	Up	cAMP-dependent protein kinase OS=Sus scrofa OX=9823 GN=PRKACA PE=3 SV=2	PRKACA	1	0.0146416	144.29	2	IVSGK(1)VR	0.014451	1.26466	1.3243	1.72987	1.0033	0.293093	0.384772	cytoplasm	K04345	PKA; protein kinase A [EC:2.7.11.11]	map01522 Endocrine resistance; map04010 MAPK signaling pathway; map04014 Ras signaling pathway; map04020 Calcium signaling pathway; map04024 cAMP signaling pathway; map04062 Chemokine signaling pathway; map04114 Oocyte meiosis; map04140 Autophagy - animal; map04211 Longevity regulating pathway; map04213 Longevity regulating pathway - multiple species; map04261 Adrenergic signaling in cardiomyocyt…	GO:0001704 formation of primary germ layer; GO:0001707 mesoderm formation; GO:0006464 cellular protein modification process; GO:0006468 protein phosphorylation; GO:0006793 phosphorus metabolic process; GO:0006796 phosphate-containing compound metabolic process; GO:0006807 nitrogen compound metabolic process; GO:0006950 response to stress; GO:0007275 multicellular organism development; GO:0007369 …	GO:0001669 acrosomal vesicle; GO:0001674 female germ cell nucleus; GO:0005622 intracellular; GO:0005623 cell; GO:0005634 nucleus; GO:0005737 cytoplasm; GO:0005929 cilium; GO:0005952 cAMP-dependent protein kinase complex; GO:0012505 endomembrane system; GO:0030141 secretory granule; GO:0031410 cytoplasmic vesicle; GO:0031514 motile cilium; GO:0031594 neuromuscular junction; GO:0031982 vesicle; GO:…	GO:0003824 catalytic activity; GO:0004672 protein kinase activity; GO:0004674 protein serine/threonine kinase activity; GO:0004690 cyclic nucleotide-dependent protein kinase activity; GO:0004691 cAMP-dependent protein kinase activity; GO:0005488 binding; GO:0005515 protein binding; GO:0016301 kinase activity; GO:0016740 transferase activity; GO:0016772 transferase activity, transferring phosphoru…	PF00069	Protein kinase domain	T	KOG0616	cAMP-dependent protein kinase catalytic subunit (PKA)
A0A287ACC3	272	K	4.567	0.0244407	Up	cAMP-dependent protein kinase OS=Sus scrofa OX=9823 GN=PRKACA PE=3 SV=2	PRKACA	1	7.55044e-06	215.14	2	NLLQVDLTK(1)R	0.065852	1.27577	1.25106	2.39538	0.688618	0.191924	0.197244	cytoplasm	K04345	PKA; protein kinase A [EC:2.7.11.11]	map01522 Endocrine resistance; map04010 MAPK signaling pathway; map04014 Ras signaling pathway; map04020 Calcium signaling pathway; map04024 cAMP signaling pathway; map04062 Chemokine signaling pathway; map04114 Oocyte meiosis; map04140 Autophagy - animal; map04211 Longevity regulating pathway; map04213 Longevity regulating pathway - multiple species; map04261 Adrenergic signaling in cardiomyocyt…	GO:0001704 formation of primary germ layer; GO:0001707 mesoderm formation; GO:0006464 cellular protein modification process; GO:0006468 protein phosphorylation; GO:0006793 phosphorus metabolic process; GO:0006796 phosphate-containing compound metabolic process; GO:0006807 nitrogen compound metabolic process; GO:0006950 response to stress; GO:0007275 multicellular organism development; GO:0007369 …	GO:0001669 acrosomal vesicle; GO:0001674 female germ cell nucleus; GO:0005622 intracellular; GO:0005623 cell; GO:0005634 nucleus; GO:0005737 cytoplasm; GO:0005929 cilium; GO:0005952 cAMP-dependent protein kinase complex; GO:0012505 endomembrane system; GO:0030141 secretory granule; GO:0031410 cytoplasmic vesicle; GO:0031514 motile cilium; GO:0031594 neuromuscular junction; GO:0031982 vesicle; GO:…	GO:0003824 catalytic activity; GO:0004672 protein kinase activity; GO:0004674 protein serine/threonine kinase activity; GO:0004690 cyclic nucleotide-dependent protein kinase activity; GO:0004691 cAMP-dependent protein kinase activity; GO:0005488 binding; GO:0005515 protein binding; GO:0016301 kinase activity; GO:0016740 transferase activity; GO:0016772 transferase activity, transferring phosphoru…	PF00069	Protein kinase domain	T	KOG0616	cAMP-dependent protein kinase catalytic subunit (PKA)
A0A286ZUN9	34	K	2.509	0.0476594	Up	Complex I-23kD OS=Sus scrofa OX=9823 GN=NDUFS8 PE=1 SV=2	NDUFS8	1	0.00333812	113.47	2	EPSMDMK(1)SVTDR	-0.027836	1.4719	1.59257	0.885955	0.421691	0.627889		mitochondria	K03941	NDUFS8; NADH dehydrogenase (ubiquinone) Fe-S protein 8 [EC:7.1.1.2 1.6.99.3]	map00190 Oxidative phosphorylation; map01100 Metabolic pathways; map04714 Thermogenesis; map04723 Retrograde endocannabinoid signaling; map04932 Non-alcoholic fatty liver disease (NAFLD); map05010 Alzheimer disease; map05012 Parkinson disease; map05016 Huntington disease	GO:0006091 generation of precursor metabolites and energy; GO:0006119 oxidative phosphorylation; GO:0006120 mitochondrial electron transport, NADH to ubiquinone; GO:0006139 nucleobase-containing compound metabolic process; GO:0006163 purine nucleotide metabolic process; GO:0006725 cellular aromatic compound metabolic process; GO:0006753 nucleoside phosphate metabolic process; GO:0006793 phosphoru…	GO:0005622 intracellular; GO:0005623 cell; GO:0005737 cytoplasm; GO:0005739 mitochondrion; GO:0005740 mitochondrial envelope; GO:0005743 mitochondrial inner membrane; GO:0005746 mitochondrial respirasome; GO:0005747 mitochondrial respiratory chain complex I; GO:0005759 mitochondrial matrix; GO:0016020 membrane; GO:0019866 organelle inner membrane; GO:0030964 NADH dehydrogenase complex; GO:0031090…	GO:0003824 catalytic activity; GO:0003954 NADH dehydrogenase activity; GO:0008137 NADH dehydrogenase (ubiquinone) activity; GO:0016491 oxidoreductase activity; GO:0016651 oxidoreductase activity, acting on NAD(P)H; GO:0016655 oxidoreductase activity, acting on NAD(P)H, quinone or similar compound as acceptor; GO:0050136 NADH dehydrogenase (quinone) activity;	PF12838	4Fe-4S dicluster domain	C	KOG3256	NADH:ubiquinone oxidoreductase, NDUFS8/23 kDa subunit
F1RMC3	338	K	5.808	0.00825043	Up	Exportin 7 OS=Sus scrofa OX=9823 GN=XPO7 PE=1 SV=4	XPO7	1	0.00036668	160.88	2	LK(1)SNYQLGELVK	-0.45691	1.68419	1.20638	2.22813	0.455698	0.144742	0.280868	nucleus	K18460	XPO7, EXP7; exportin-7		GO:0006611 protein export from nucleus; GO:0006810 transport; GO:0006886 intracellular protein transport; GO:0006913 nucleocytoplasmic transport; GO:0008104 protein localization; GO:0015031 protein transport; GO:0015833 peptide transport; GO:0033036 macromolecule localization; GO:0034613 cellular protein localization; GO:0042886 amide transport; GO:0045184 establishment of protein localization; G…	GO:0005622 intracellular; GO:0005623 cell; GO:0005634 nucleus; GO:0005635 nuclear envelope; GO:0005643 nuclear pore; GO:0005737 cytoplasm; GO:0012505 endomembrane system; GO:0031967 organelle envelope; GO:0031975 envelope; GO:0032991 protein-containing complex; GO:0043226 organelle; GO:0043227 membrane-bounded organelle; GO:0043229 intracellular organelle; GO:0043231 intracellular membrane-bounde…	GO:0005049 nuclear export signal receptor activity; GO:0005488 binding; GO:0005515 protein binding; GO:0008536 Ran GTPase binding; GO:0017016 Ras GTPase binding; GO:0019899 enzyme binding; GO:0031267 small GTPase binding; GO:0051020 GTPase binding; GO:0140104 molecular carrier activity; GO:0140142 nucleocytoplasmic carrier activity;			UY	KOG1410	Nuclear transport receptor RanBP16 (importin beta superfamily)
F1RMC3	1020	K	4.584	0.0342138	Up	Exportin 7 OS=Sus scrofa OX=9823 GN=XPO7 PE=1 SV=4	XPO7	1	0.0256986	107.32	2	NLLTK(1)NR	-0.76775	2.00169		1.76549	0.53537	0.189977	0.507473	nucleus	K18460	XPO7, EXP7; exportin-7		GO:0006611 protein export from nucleus; GO:0006810 transport; GO:0006886 intracellular protein transport; GO:0006913 nucleocytoplasmic transport; GO:0008104 protein localization; GO:0015031 protein transport; GO:0015833 peptide transport; GO:0033036 macromolecule localization; GO:0034613 cellular protein localization; GO:0042886 amide transport; GO:0045184 establishment of protein localization; G…	GO:0005622 intracellular; GO:0005623 cell; GO:0005634 nucleus; GO:0005635 nuclear envelope; GO:0005643 nuclear pore; GO:0005737 cytoplasm; GO:0012505 endomembrane system; GO:0031967 organelle envelope; GO:0031975 envelope; GO:0032991 protein-containing complex; GO:0043226 organelle; GO:0043227 membrane-bounded organelle; GO:0043229 intracellular organelle; GO:0043231 intracellular membrane-bounde…	GO:0005049 nuclear export signal receptor activity; GO:0005488 binding; GO:0005515 protein binding; GO:0008536 Ran GTPase binding; GO:0017016 Ras GTPase binding; GO:0019899 enzyme binding; GO:0031267 small GTPase binding; GO:0051020 GTPase binding; GO:0140104 molecular carrier activity; GO:0140142 nucleocytoplasmic carrier activity;			UY	KOG1410	Nuclear transport receptor RanBP16 (importin beta superfamily)
A0A286ZVG1	191	K	2.208	0.01632	Up	Serine/threonine-protein phosphatase PGAM5, mitochondrial isoform 2 (Fragment)(predicted) OS=Sus scrofa OX=9823 GN=PGAM5 PE=4 SV=1	PGAM5	1	2.52333e-10	156.43	3	EGAPIEPDPPVSHWK(1)PEAVYYEDGAR	0.015863	1.61631	1.59679	0.916439	0.611117	0.590051	0.669293	extracellular	K15637	PGAM5; serine/threonine-protein phosphatase PGAM5 [EC:3.1.3.16]	map04137 Mitophagy - animal; map04217 Necroptosis; map04668 TNF signaling pathway	GO:0006464 cellular protein modification process; GO:0006470 protein dephosphorylation; GO:0006793 phosphorus metabolic process; GO:0006796 phosphate-containing compound metabolic process; GO:0006807 nitrogen compound metabolic process; GO:0006914 autophagy; GO:0008152 metabolic process; GO:0008219 cell death; GO:0009056 catabolic process; GO:0009987 cellular process; GO:0012501 programmed cell d…	GO:0005622 intracellular; GO:0005623 cell; GO:0005737 cytoplasm; GO:0005739 mitochondrion; GO:0005740 mitochondrial envelope; GO:0005741 mitochondrial outer membrane; GO:0016020 membrane; GO:0019867 outer membrane; GO:0031090 organelle membrane; GO:0031966 mitochondrial membrane; GO:0031967 organelle envelope; GO:0031968 organelle outer membrane; GO:0031975 envelope; GO:0043226 organelle; GO:0043…	GO:0003824 catalytic activity; GO:0004721 phosphoprotein phosphatase activity; GO:0004722 protein serine/threonine phosphatase activity; GO:0005096 GTPase activator activity; GO:0005488 binding; GO:0008047 enzyme activator activity; GO:0016787 hydrolase activity; GO:0016788 hydrolase activity, acting on ester bonds; GO:0016791 phosphatase activity; GO:0030234 enzyme regulator activity; GO:0030695…	PF00300	Histidine phosphatase superfamily (branch 1)	S	KOG4609	Predicted phosphoglycerate mutase
A0A286ZVG1	144	K	16.945	0.000430858	Up	Serine/threonine-protein phosphatase PGAM5, mitochondrial isoform 2 (Fragment)(predicted) OS=Sus scrofa OX=9823 GN=PGAM5 PE=4 SV=1	PGAM5	1	0.000939454	187.41	2	FNK(1)IVHSSMTR	-1.2601	1.83223	2.08566	1.74775	0.130179	0.0617793	0.142405	extracellular	K15637	PGAM5; serine/threonine-protein phosphatase PGAM5 [EC:3.1.3.16]	map04137 Mitophagy - animal; map04217 Necroptosis; map04668 TNF signaling pathway	GO:0006464 cellular protein modification process; GO:0006470 protein dephosphorylation; GO:0006793 phosphorus metabolic process; GO:0006796 phosphate-containing compound metabolic process; GO:0006807 nitrogen compound metabolic process; GO:0006914 autophagy; GO:0008152 metabolic process; GO:0008219 cell death; GO:0009056 catabolic process; GO:0009987 cellular process; GO:0012501 programmed cell d…	GO:0005622 intracellular; GO:0005623 cell; GO:0005737 cytoplasm; GO:0005739 mitochondrion; GO:0005740 mitochondrial envelope; GO:0005741 mitochondrial outer membrane; GO:0016020 membrane; GO:0019867 outer membrane; GO:0031090 organelle membrane; GO:0031966 mitochondrial membrane; GO:0031967 organelle envelope; GO:0031968 organelle outer membrane; GO:0031975 envelope; GO:0043226 organelle; GO:0043…	GO:0003824 catalytic activity; GO:0004721 phosphoprotein phosphatase activity; GO:0004722 protein serine/threonine phosphatase activity; GO:0005096 GTPase activator activity; GO:0005488 binding; GO:0008047 enzyme activator activity; GO:0016787 hydrolase activity; GO:0016788 hydrolase activity, acting on ester bonds; GO:0016791 phosphatase activity; GO:0030234 enzyme regulator activity; GO:0030695…	PF00300	Histidine phosphatase superfamily (branch 1)	S	KOG4609	Predicted phosphoglycerate mutase
A0A286ZVQ0	42	K	3.93	0.000258842	Up	Acyl-coenzyme A thioesterase 2, mitochondrial(predicted) OS=Sus scrofa OX=9823 GN=ACOT4 PE=1 SV=2	ACOT4	1	0.0040599	132.29	2	DEK(1)GALFR	0.73605	1.49139	1.92941	1.36218	0.416795	0.425315	0.374918	cytoplasm	K01068	ACOT1_2_4; acyl-coenzyme A thioesterase 1/2/4 [EC:3.1.2.2]	map00062 Fatty acid elongation; map01040 Biosynthesis of unsaturated fatty acids; map01100 Metabolic pathways	GO:0000038 very long-chain fatty acid metabolic process; GO:0001666 response to hypoxia; GO:0001676 long-chain fatty acid metabolic process; GO:0006082 organic acid metabolic process; GO:0006139 nucleobase-containing compound metabolic process; GO:0006163 purine nucleotide metabolic process; GO:0006605 protein targeting; GO:0006625 protein targeting to peroxisome; GO:0006629 lipid metabolic proce…	GO:0005622 intracellular; GO:0005623 cell; GO:0005737 cytoplasm; GO:0005739 mitochondrion; GO:0005759 mitochondrial matrix; GO:0005777 peroxisome; GO:0005782 peroxisomal matrix; GO:0005829 cytosol; GO:0031907 microbody lumen; GO:0031974 membrane-enclosed lumen; GO:0042579 microbody; GO:0043226 organelle; GO:0043227 membrane-bounded organelle; GO:0043229 intracellular organelle; GO:0043231 intrace…	GO:0003824 catalytic activity; GO:0005102 signaling receptor binding; GO:0005488 binding; GO:0005515 protein binding; GO:0016289 CoA hydrolase activity; GO:0016290 palmitoyl-CoA hydrolase activity; GO:0016787 hydrolase activity; GO:0016788 hydrolase activity, acting on ester bonds; GO:0016790 thiolester hydrolase activity; GO:0047617 acyl-CoA hydrolase activity;	PF08840	BAAT / Acyl-CoA thioester hydrolase C terminal
A0A286ZVQ0	348	K	9.941	0.000305548	Up	Acyl-coenzyme A thioesterase 2, mitochondrial(predicted) OS=Sus scrofa OX=9823 GN=ACOT4 PE=1 SV=2	ACOT4	1	0.00776261	100.02	2	EK(1)PQIICYPR	-1.2976	1.40495	1.8454	2.20123	0.239424	0.159295	0.149697	cytoplasm	K01068	ACOT1_2_4; acyl-coenzyme A thioesterase 1/2/4 [EC:3.1.2.2]	map00062 Fatty acid elongation; map01040 Biosynthesis of unsaturated fatty acids; map01100 Metabolic pathways	GO:0000038 very long-chain fatty acid metabolic process; GO:0001666 response to hypoxia; GO:0001676 long-chain fatty acid metabolic process; GO:0006082 organic acid metabolic process; GO:0006139 nucleobase-containing compound metabolic process; GO:0006163 purine nucleotide metabolic process; GO:0006605 protein targeting; GO:0006625 protein targeting to peroxisome; GO:0006629 lipid metabolic proce…	GO:0005622 intracellular; GO:0005623 cell; GO:0005737 cytoplasm; GO:0005739 mitochondrion; GO:0005759 mitochondrial matrix; GO:0005777 peroxisome; GO:0005782 peroxisomal matrix; GO:0005829 cytosol; GO:0031907 microbody lumen; GO:0031974 membrane-enclosed lumen; GO:0042579 microbody; GO:0043226 organelle; GO:0043227 membrane-bounded organelle; GO:0043229 intracellular organelle; GO:0043231 intrace…	GO:0003824 catalytic activity; GO:0005102 signaling receptor binding; GO:0005488 binding; GO:0005515 protein binding; GO:0016289 CoA hydrolase activity; GO:0016290 palmitoyl-CoA hydrolase activity; GO:0016787 hydrolase activity; GO:0016788 hydrolase activity, acting on ester bonds; GO:0016790 thiolester hydrolase activity; GO:0047617 acyl-CoA hydrolase activity;	PF08840	BAAT / Acyl-CoA thioester hydrolase C terminal
F1RIP6	137	K	0.053	0.000294085	Down	Nucleobindin-1 OS=Sus scrofa OX=9823 GN=NUCB1 PE=1 SV=3	NUCB1	1	9.75727e-05	119.45	3	DLAQYDAAHHEEFK(1)R	0.72406	0.120846	0.0789949	0.104755	2.76101	1.44141	1.49298	nucleus	K20371	NUCB; nucleobindin		GO:0006464 cellular protein modification process; GO:0006807 nitrogen compound metabolic process; GO:0008152 metabolic process; GO:0009636 response to toxic substance; GO:0009987 cellular process; GO:0019538 protein metabolic process; GO:0032386 regulation of intracellular transport; GO:0032879 regulation of localization; GO:0032880 regulation of protein localization; GO:0033157 regulation of int…	GO:0000139 Golgi membrane; GO:0005576 extracellular region; GO:0005615 extracellular space; GO:0005622 intracellular; GO:0005623 cell; GO:0005634 nucleus; GO:0005737 cytoplasm; GO:0005768 endosome; GO:0005769 early endosome; GO:0005783 endoplasmic reticulum; GO:0005788 endoplasmic reticulum lumen; GO:0005791 rough endoplasmic reticulum; GO:0005793 endoplasmic reticulum-Golgi intermediate compartm…	GO:0001965 G-protein alpha-subunit binding; GO:0005488 binding; GO:0005509 calcium ion binding; GO:0005515 protein binding; GO:0043167 ion binding; GO:0043169 cation binding; GO:0046872 metal ion binding;	PF13499	EF-hand domain pair	S	KOG3866	DNA-binding protein of the nucleobindin family
A0A286ZWH7	749	K	7.019	0.0151072	Up	A-kinase anchoring protein 4 OS=Sus scrofa OX=9823 GN=AKAP4 PE=3 SV=2	AKAP4	1	3.90465e-13	164.31	3	AALAELEEQAALANNANYQVSGPK(1)R	-0.54825	2.13901	1.36217			0.269417	0.229403	cytoplasm,nucleus	K16521	AKAP4; A-kinase anchor protein 4		GO:0000003 reproduction; GO:0006928 movement of cell or subcellular component; GO:0006996 organelle organization; GO:0007154 cell communication; GO:0007165 signal transduction; GO:0007166 cell surface receptor signaling pathway; GO:0007167 enzyme linked receptor protein signaling pathway; GO:0007178 transmembrane receptor protein serine/threonine kinase signaling pathway; GO:0007338 single fertil…	GO:0005622 intracellular; GO:0005623 cell; GO:0005737 cytoplasm; GO:0005856 cytoskeleton; GO:0005929 cilium; GO:0005952 cAMP-dependent protein kinase complex; GO:0030016 myofibril; GO:0030017 sarcomere; GO:0030018 Z disc; GO:0031514 motile cilium; GO:0031674 I band; GO:0032991 protein-containing complex; GO:0035686 sperm fibrous sheath; GO:0036126 sperm flagellum; GO:0042995 cell projection; GO:0…	GO:0005488 binding; GO:0005515 protein binding; GO:0051018 protein kinase A binding;
A0A286ZWH7	606	K	21.925	0.0434356	Up	A-kinase anchoring protein 4 OS=Sus scrofa OX=9823 GN=AKAP4 PE=3 SV=2	AKAP4	1	9.65813e-105	389.16	3	ALSMK(1)HLESHGAPGPSTSLK	4.1908	1.12014	1.46786	3.15027	0.137801	0.00263279	0.121287	cytoplasm,nucleus	K16521	AKAP4; A-kinase anchor protein 4		GO:0000003 reproduction; GO:0006928 movement of cell or subcellular component; GO:0006996 organelle organization; GO:0007154 cell communication; GO:0007165 signal transduction; GO:0007166 cell surface receptor signaling pathway; GO:0007167 enzyme linked receptor protein signaling pathway; GO:0007178 transmembrane receptor protein serine/threonine kinase signaling pathway; GO:0007338 single fertil…	GO:0005622 intracellular; GO:0005623 cell; GO:0005737 cytoplasm; GO:0005856 cytoskeleton; GO:0005929 cilium; GO:0005952 cAMP-dependent protein kinase complex; GO:0030016 myofibril; GO:0030017 sarcomere; GO:0030018 Z disc; GO:0031514 motile cilium; GO:0031674 I band; GO:0032991 protein-containing complex; GO:0035686 sperm fibrous sheath; GO:0036126 sperm flagellum; GO:0042995 cell projection; GO:0…	GO:0005488 binding; GO:0005515 protein binding; GO:0051018 protein kinase A binding;
A0A286ZWH7	467	K	21.326	0.000453244	Up	A-kinase anchoring protein 4 OS=Sus scrofa OX=9823 GN=AKAP4 PE=3 SV=2	AKAP4	1	7.04375e-28	283.82	2	CK(1)NQSLEFSAMK	2.1551	1.31075	1.43999	2.98051	0.0752059	0.0830729	0.110466	cytoplasm,nucleus	K16521	AKAP4; A-kinase anchor protein 4		GO:0000003 reproduction; GO:0006928 movement of cell or subcellular component; GO:0006996 organelle organization; GO:0007154 cell communication; GO:0007165 signal transduction; GO:0007166 cell surface receptor signaling pathway; GO:0007167 enzyme linked receptor protein signaling pathway; GO:0007178 transmembrane receptor protein serine/threonine kinase signaling pathway; GO:0007338 single fertil…	GO:0005622 intracellular; GO:0005623 cell; GO:0005737 cytoplasm; GO:0005856 cytoskeleton; GO:0005929 cilium; GO:0005952 cAMP-dependent protein kinase complex; GO:0030016 myofibril; GO:0030017 sarcomere; GO:0030018 Z disc; GO:0031514 motile cilium; GO:0031674 I band; GO:0032991 protein-containing complex; GO:0035686 sperm fibrous sheath; GO:0036126 sperm flagellum; GO:0042995 cell projection; GO:0…	GO:0005488 binding; GO:0005515 protein binding; GO:0051018 protein kinase A binding;
A0A286ZWH7	414	K	5.987	0.000980642	Up	A-kinase anchoring protein 4 OS=Sus scrofa OX=9823 GN=AKAP4 PE=3 SV=2	AKAP4	1	5.44117e-188	454.08	3	NLHNITGVLMTDSDFVSAVK(1)R	2.3588	1.51825	1.33032	2.29268	0.36076	0.251898	0.246095	cytoplasm,nucleus	K16521	AKAP4; A-kinase anchor protein 4		GO:0000003 reproduction; GO:0006928 movement of cell or subcellular component; GO:0006996 organelle organization; GO:0007154 cell communication; GO:0007165 signal transduction; GO:0007166 cell surface receptor signaling pathway; GO:0007167 enzyme linked receptor protein signaling pathway; GO:0007178 transmembrane receptor protein serine/threonine kinase signaling pathway; GO:0007338 single fertil…	GO:0005622 intracellular; GO:0005623 cell; GO:0005737 cytoplasm; GO:0005856 cytoskeleton; GO:0005929 cilium; GO:0005952 cAMP-dependent protein kinase complex; GO:0030016 myofibril; GO:0030017 sarcomere; GO:0030018 Z disc; GO:0031514 motile cilium; GO:0031674 I band; GO:0032991 protein-containing complex; GO:0035686 sperm fibrous sheath; GO:0036126 sperm flagellum; GO:0042995 cell projection; GO:0…	GO:0005488 binding; GO:0005515 protein binding; GO:0051018 protein kinase A binding;
A0A286ZWH7	570	K	28.264	9.55936e-05	Up	A-kinase anchoring protein 4 OS=Sus scrofa OX=9823 GN=AKAP4 PE=3 SV=2	AKAP4	1	9.89017e-149	416.41	3	GK(1)DAFEDDCPGSTMGYMTQSAQYEK	-0.41998	1.94307	1.56313	2.28877	0.0857405	0.0464784	0.0728103	cytoplasm,nucleus	K16521	AKAP4; A-kinase anchor protein 4		GO:0000003 reproduction; GO:0006928 movement of cell or subcellular component; GO:0006996 organelle organization; GO:0007154 cell communication; GO:0007165 signal transduction; GO:0007166 cell surface receptor signaling pathway; GO:0007167 enzyme linked receptor protein signaling pathway; GO:0007178 transmembrane receptor protein serine/threonine kinase signaling pathway; GO:0007338 single fertil…	GO:0005622 intracellular; GO:0005623 cell; GO:0005737 cytoplasm; GO:0005856 cytoskeleton; GO:0005929 cilium; GO:0005952 cAMP-dependent protein kinase complex; GO:0030016 myofibril; GO:0030017 sarcomere; GO:0030018 Z disc; GO:0031514 motile cilium; GO:0031674 I band; GO:0032991 protein-containing complex; GO:0035686 sperm fibrous sheath; GO:0036126 sperm flagellum; GO:0042995 cell projection; GO:0…	GO:0005488 binding; GO:0005515 protein binding; GO:0051018 protein kinase A binding;
A0A286ZWH7	31	K	22.752	0.000475261	Up	A-kinase anchoring protein 4 OS=Sus scrofa OX=9823 GN=AKAP4 PE=3 SV=2	AKAP4	1	6.08477e-27	277.31	3	GMCK(1)VDLYSPTGQQDQDRK	-0.46962	1.97625	1.12877	2.64237	0.112583	0.072063	0.0679667	cytoplasm,nucleus	K16521	AKAP4; A-kinase anchor protein 4		GO:0000003 reproduction; GO:0006928 movement of cell or subcellular component; GO:0006996 organelle organization; GO:0007154 cell communication; GO:0007165 signal transduction; GO:0007166 cell surface receptor signaling pathway; GO:0007167 enzyme linked receptor protein signaling pathway; GO:0007178 transmembrane receptor protein serine/threonine kinase signaling pathway; GO:0007338 single fertil…	GO:0005622 intracellular; GO:0005623 cell; GO:0005737 cytoplasm; GO:0005856 cytoskeleton; GO:0005929 cilium; GO:0005952 cAMP-dependent protein kinase complex; GO:0030016 myofibril; GO:0030017 sarcomere; GO:0030018 Z disc; GO:0031514 motile cilium; GO:0031674 I band; GO:0032991 protein-containing complex; GO:0035686 sperm fibrous sheath; GO:0036126 sperm flagellum; GO:0042995 cell projection; GO:0…	GO:0005488 binding; GO:0005515 protein binding; GO:0051018 protein kinase A binding;
A0A286ZWH7	145	K	16.075	0.00132114	Up	A-kinase anchoring protein 4 OS=Sus scrofa OX=9823 GN=AKAP4 PE=3 SV=2	AKAP4	1	6.64786e-77	293.19	4	HK(1)VGDTEGECHQLHSGNCYSVYADQLNMDYMANGPQNLR	3.0286	1.4825	1.99628	2.16982	0.199774	0.0632776	0.0883477	cytoplasm,nucleus	K16521	AKAP4; A-kinase anchor protein 4		GO:0000003 reproduction; GO:0006928 movement of cell or subcellular component; GO:0006996 organelle organization; GO:0007154 cell communication; GO:0007165 signal transduction; GO:0007166 cell surface receptor signaling pathway; GO:0007167 enzyme linked receptor protein signaling pathway; GO:0007178 transmembrane receptor protein serine/threonine kinase signaling pathway; GO:0007338 single fertil…	GO:0005622 intracellular; GO:0005623 cell; GO:0005737 cytoplasm; GO:0005856 cytoskeleton; GO:0005929 cilium; GO:0005952 cAMP-dependent protein kinase complex; GO:0030016 myofibril; GO:0030017 sarcomere; GO:0030018 Z disc; GO:0031514 motile cilium; GO:0031674 I band; GO:0032991 protein-containing complex; GO:0035686 sperm fibrous sheath; GO:0036126 sperm flagellum; GO:0042995 cell projection; GO:0…	GO:0005488 binding; GO:0005515 protein binding; GO:0051018 protein kinase A binding;
A0A286ZWH7	382	K	10.915	0.000796362	Up	A-kinase anchoring protein 4 OS=Sus scrofa OX=9823 GN=AKAP4 PE=3 SV=2	AKAP4	1	1.36379e-115	408.57	2	HTK(1)EIVSDLIDSCMK	-0.018161	1.3453	1.36054	2.79059	0.186585	0.141425	0.175556	cytoplasm,nucleus	K16521	AKAP4; A-kinase anchor protein 4		GO:0000003 reproduction; GO:0006928 movement of cell or subcellular component; GO:0006996 organelle organization; GO:0007154 cell communication; GO:0007165 signal transduction; GO:0007166 cell surface receptor signaling pathway; GO:0007167 enzyme linked receptor protein signaling pathway; GO:0007178 transmembrane receptor protein serine/threonine kinase signaling pathway; GO:0007338 single fertil…	GO:0005622 intracellular; GO:0005623 cell; GO:0005737 cytoplasm; GO:0005856 cytoskeleton; GO:0005929 cilium; GO:0005952 cAMP-dependent protein kinase complex; GO:0030016 myofibril; GO:0030017 sarcomere; GO:0030018 Z disc; GO:0031514 motile cilium; GO:0031674 I band; GO:0032991 protein-containing complex; GO:0035686 sperm fibrous sheath; GO:0036126 sperm flagellum; GO:0042995 cell projection; GO:0…	GO:0005488 binding; GO:0005515 protein binding; GO:0051018 protein kinase A binding;
A0A286ZWH7	305	K	8.608	0.000287665	Up	A-kinase anchoring protein 4 OS=Sus scrofa OX=9823 GN=AKAP4 PE=3 SV=2	AKAP4	1	2.0346e-05	210.27	2	K(1)TFLYSELSNK(1)NK	1.3031	1.30317	1.67907	2.39329	0.217493	0.196941	0.210035	cytoplasm,nucleus	K16521	AKAP4; A-kinase anchor protein 4		GO:0000003 reproduction; GO:0006928 movement of cell or subcellular component; GO:0006996 organelle organization; GO:0007154 cell communication; GO:0007165 signal transduction; GO:0007166 cell surface receptor signaling pathway; GO:0007167 enzyme linked receptor protein signaling pathway; GO:0007178 transmembrane receptor protein serine/threonine kinase signaling pathway; GO:0007338 single fertil…	GO:0005622 intracellular; GO:0005623 cell; GO:0005737 cytoplasm; GO:0005856 cytoskeleton; GO:0005929 cilium; GO:0005952 cAMP-dependent protein kinase complex; GO:0030016 myofibril; GO:0030017 sarcomere; GO:0030018 Z disc; GO:0031514 motile cilium; GO:0031674 I band; GO:0032991 protein-containing complex; GO:0035686 sperm fibrous sheath; GO:0036126 sperm flagellum; GO:0042995 cell projection; GO:0…	GO:0005488 binding; GO:0005515 protein binding; GO:0051018 protein kinase A binding;
A0A286ZWH7	315	K	9.983	0.00278046	Up	A-kinase anchoring protein 4 OS=Sus scrofa OX=9823 GN=AKAP4 PE=3 SV=2	AKAP4	1	2.74215e-13	246.41	2	TFLYSELSNK(1)NK	0.94352	1.34005	1.3053	2.80835	0.262736	0.113524	0.17004	cytoplasm,nucleus	K16521	AKAP4; A-kinase anchor protein 4		GO:0000003 reproduction; GO:0006928 movement of cell or subcellular component; GO:0006996 organelle organization; GO:0007154 cell communication; GO:0007165 signal transduction; GO:0007166 cell surface receptor signaling pathway; GO:0007167 enzyme linked receptor protein signaling pathway; GO:0007178 transmembrane receptor protein serine/threonine kinase signaling pathway; GO:0007338 single fertil…	GO:0005622 intracellular; GO:0005623 cell; GO:0005737 cytoplasm; GO:0005856 cytoskeleton; GO:0005929 cilium; GO:0005952 cAMP-dependent protein kinase complex; GO:0030016 myofibril; GO:0030017 sarcomere; GO:0030018 Z disc; GO:0031514 motile cilium; GO:0031674 I band; GO:0032991 protein-containing complex; GO:0035686 sperm fibrous sheath; GO:0036126 sperm flagellum; GO:0042995 cell projection; GO:0…	GO:0005488 binding; GO:0005515 protein binding; GO:0051018 protein kinase A binding;
A0A286ZWH7	720	K	11.118	0.00184411	Up	A-kinase anchoring protein 4 OS=Sus scrofa OX=9823 GN=AKAP4 PE=3 SV=2	AKAP4	1	2.16906e-13	249.03	2	LCLIMAK(1)YSNNR	0.1232	1.84186	1.35942	1.51587	0.104054		0.178791	cytoplasm,nucleus	K16521	AKAP4; A-kinase anchor protein 4		GO:0000003 reproduction; GO:0006928 movement of cell or subcellular component; GO:0006996 organelle organization; GO:0007154 cell communication; GO:0007165 signal transduction; GO:0007166 cell surface receptor signaling pathway; GO:0007167 enzyme linked receptor protein signaling pathway; GO:0007178 transmembrane receptor protein serine/threonine kinase signaling pathway; GO:0007338 single fertil…	GO:0005622 intracellular; GO:0005623 cell; GO:0005737 cytoplasm; GO:0005856 cytoskeleton; GO:0005929 cilium; GO:0005952 cAMP-dependent protein kinase complex; GO:0030016 myofibril; GO:0030017 sarcomere; GO:0030018 Z disc; GO:0031514 motile cilium; GO:0031674 I band; GO:0032991 protein-containing complex; GO:0035686 sperm fibrous sheath; GO:0036126 sperm flagellum; GO:0042995 cell projection; GO:0…	GO:0005488 binding; GO:0005515 protein binding; GO:0051018 protein kinase A binding;
A0A286ZWH7	251	K	2.753	0.00153908	Up	A-kinase anchoring protein 4 OS=Sus scrofa OX=9823 GN=AKAP4 PE=3 SV=2	AKAP4	1	3.5157e-07	130	3	LEGGSK(1)CLHHSIYPPSGDK	2.4963	1.14511	1.47079	1.78552	0.516422	0.535683	0.546479	cytoplasm,nucleus	K16521	AKAP4; A-kinase anchor protein 4		GO:0000003 reproduction; GO:0006928 movement of cell or subcellular component; GO:0006996 organelle organization; GO:0007154 cell communication; GO:0007165 signal transduction; GO:0007166 cell surface receptor signaling pathway; GO:0007167 enzyme linked receptor protein signaling pathway; GO:0007178 transmembrane receptor protein serine/threonine kinase signaling pathway; GO:0007338 single fertil…	GO:0005622 intracellular; GO:0005623 cell; GO:0005737 cytoplasm; GO:0005856 cytoskeleton; GO:0005929 cilium; GO:0005952 cAMP-dependent protein kinase complex; GO:0030016 myofibril; GO:0030017 sarcomere; GO:0030018 Z disc; GO:0031514 motile cilium; GO:0031674 I band; GO:0032991 protein-containing complex; GO:0035686 sperm fibrous sheath; GO:0036126 sperm flagellum; GO:0042995 cell projection; GO:0…	GO:0005488 binding; GO:0005515 protein binding; GO:0051018 protein kinase A binding;
A0A286ZWH7	189	K	12.126	0.00793092	Up	A-kinase anchoring protein 4 OS=Sus scrofa OX=9823 GN=AKAP4 PE=3 SV=2	AKAP4	1	2.45295e-05	113.63	3	LEMTASK(1)NTNNNQSPSTPPAK	-0.073316	1.42267	1.24291	2.07385	0.0724343		0.188138	cytoplasm,nucleus	K16521	AKAP4; A-kinase anchor protein 4		GO:0000003 reproduction; GO:0006928 movement of cell or subcellular component; GO:0006996 organelle organization; GO:0007154 cell communication; GO:0007165 signal transduction; GO:0007166 cell surface receptor signaling pathway; GO:0007167 enzyme linked receptor protein signaling pathway; GO:0007178 transmembrane receptor protein serine/threonine kinase signaling pathway; GO:0007338 single fertil…	GO:0005622 intracellular; GO:0005623 cell; GO:0005737 cytoplasm; GO:0005856 cytoskeleton; GO:0005929 cilium; GO:0005952 cAMP-dependent protein kinase complex; GO:0030016 myofibril; GO:0030017 sarcomere; GO:0030018 Z disc; GO:0031514 motile cilium; GO:0031674 I band; GO:0032991 protein-containing complex; GO:0035686 sperm fibrous sheath; GO:0036126 sperm flagellum; GO:0042995 cell projection; GO:0…	GO:0005488 binding; GO:0005515 protein binding; GO:0051018 protein kinase A binding;
A0A286ZWH7	661	K	61.324	0.000144923	Up	A-kinase anchoring protein 4 OS=Sus scrofa OX=9823 GN=AKAP4 PE=3 SV=2	AKAP4	1	8.47928e-184	453.47	3	LLGESPFHCEDLCEGENK(1)R	0.35807	1.15329	1.8429	2.90755	0.0390561	0.0278876	0.0293276	cytoplasm,nucleus	K16521	AKAP4; A-kinase anchor protein 4		GO:0000003 reproduction; GO:0006928 movement of cell or subcellular component; GO:0006996 organelle organization; GO:0007154 cell communication; GO:0007165 signal transduction; GO:0007166 cell surface receptor signaling pathway; GO:0007167 enzyme linked receptor protein signaling pathway; GO:0007178 transmembrane receptor protein serine/threonine kinase signaling pathway; GO:0007338 single fertil…	GO:0005622 intracellular; GO:0005623 cell; GO:0005737 cytoplasm; GO:0005856 cytoskeleton; GO:0005929 cilium; GO:0005952 cAMP-dependent protein kinase complex; GO:0030016 myofibril; GO:0030017 sarcomere; GO:0030018 Z disc; GO:0031514 motile cilium; GO:0031674 I band; GO:0032991 protein-containing complex; GO:0035686 sperm fibrous sheath; GO:0036126 sperm flagellum; GO:0042995 cell projection; GO:0…	GO:0005488 binding; GO:0005515 protein binding; GO:0051018 protein kinase A binding;
A0A286ZWH7	444	K	14.769	3.26689e-05	Up	A-kinase anchoring protein 4 OS=Sus scrofa OX=9823 GN=AKAP4 PE=3 SV=2	AKAP4	1	1.83518e-05	207.29	3	LVSALLGEK(1)R	-0.32893	1.62458	1.70227	2.29266	0.144376	0.112371	0.123736	cytoplasm,nucleus	K16521	AKAP4; A-kinase anchor protein 4		GO:0000003 reproduction; GO:0006928 movement of cell or subcellular component; GO:0006996 organelle organization; GO:0007154 cell communication; GO:0007165 signal transduction; GO:0007166 cell surface receptor signaling pathway; GO:0007167 enzyme linked receptor protein signaling pathway; GO:0007178 transmembrane receptor protein serine/threonine kinase signaling pathway; GO:0007338 single fertil…	GO:0005622 intracellular; GO:0005623 cell; GO:0005737 cytoplasm; GO:0005856 cytoskeleton; GO:0005929 cilium; GO:0005952 cAMP-dependent protein kinase complex; GO:0030016 myofibril; GO:0030017 sarcomere; GO:0030018 Z disc; GO:0031514 motile cilium; GO:0031674 I band; GO:0032991 protein-containing complex; GO:0035686 sperm fibrous sheath; GO:0036126 sperm flagellum; GO:0042995 cell projection; GO:0…	GO:0005488 binding; GO:0005515 protein binding; GO:0051018 protein kinase A binding;
A0A286ZWH7	527	K	12.12	0.0178974	Up	A-kinase anchoring protein 4 OS=Sus scrofa OX=9823 GN=AKAP4 PE=3 SV=2	AKAP4	1	0.000104946	143.03	2	MASK(1)PCISNK	0.64829	1.2612		2.43393		0.14622	0.15865	cytoplasm,nucleus	K16521	AKAP4; A-kinase anchor protein 4		GO:0000003 reproduction; GO:0006928 movement of cell or subcellular component; GO:0006996 organelle organization; GO:0007154 cell communication; GO:0007165 signal transduction; GO:0007166 cell surface receptor signaling pathway; GO:0007167 enzyme linked receptor protein signaling pathway; GO:0007178 transmembrane receptor protein serine/threonine kinase signaling pathway; GO:0007338 single fertil…	GO:0005622 intracellular; GO:0005623 cell; GO:0005737 cytoplasm; GO:0005856 cytoskeleton; GO:0005929 cilium; GO:0005952 cAMP-dependent protein kinase complex; GO:0030016 myofibril; GO:0030017 sarcomere; GO:0030018 Z disc; GO:0031514 motile cilium; GO:0031674 I band; GO:0032991 protein-containing complex; GO:0035686 sperm fibrous sheath; GO:0036126 sperm flagellum; GO:0042995 cell projection; GO:0…	GO:0005488 binding; GO:0005515 protein binding; GO:0051018 protein kinase A binding;
A0A286ZWH7	533	K	154.429	0.00200602	Up	A-kinase anchoring protein 4 OS=Sus scrofa OX=9823 GN=AKAP4 PE=3 SV=2	AKAP4	1	2.72774e-06	212.39	2	PCISNK(1)EEK	-0.89916	1.25448	0.842468	2.88156	0.0090902		0.0124019	cytoplasm,nucleus	K16521	AKAP4; A-kinase anchor protein 4		GO:0000003 reproduction; GO:0006928 movement of cell or subcellular component; GO:0006996 organelle organization; GO:0007154 cell communication; GO:0007165 signal transduction; GO:0007166 cell surface receptor signaling pathway; GO:0007167 enzyme linked receptor protein signaling pathway; GO:0007178 transmembrane receptor protein serine/threonine kinase signaling pathway; GO:0007338 single fertil…	GO:0005622 intracellular; GO:0005623 cell; GO:0005737 cytoplasm; GO:0005856 cytoskeleton; GO:0005929 cilium; GO:0005952 cAMP-dependent protein kinase complex; GO:0030016 myofibril; GO:0030017 sarcomere; GO:0030018 Z disc; GO:0031514 motile cilium; GO:0031674 I band; GO:0032991 protein-containing complex; GO:0035686 sperm fibrous sheath; GO:0036126 sperm flagellum; GO:0042995 cell projection; GO:0…	GO:0005488 binding; GO:0005515 protein binding; GO:0051018 protein kinase A binding;
A0A286ZWH7	489	K	26.717	0.00150584	Up	A-kinase anchoring protein 4 OS=Sus scrofa OX=9823 GN=AKAP4 PE=3 SV=2	AKAP4	1	4.31139e-06	215.34	2	MK(1)PEECK(1)PLTSAEK	-1.0084	1.52955	0.883659	3.37031	0.0650811	0.0609341	0.0904571	cytoplasm,nucleus	K16521	AKAP4; A-kinase anchor protein 4		GO:0000003 reproduction; GO:0006928 movement of cell or subcellular component; GO:0006996 organelle organization; GO:0007154 cell communication; GO:0007165 signal transduction; GO:0007166 cell surface receptor signaling pathway; GO:0007167 enzyme linked receptor protein signaling pathway; GO:0007178 transmembrane receptor protein serine/threonine kinase signaling pathway; GO:0007338 single fertil…	GO:0005622 intracellular; GO:0005623 cell; GO:0005737 cytoplasm; GO:0005856 cytoskeleton; GO:0005929 cilium; GO:0005952 cAMP-dependent protein kinase complex; GO:0030016 myofibril; GO:0030017 sarcomere; GO:0030018 Z disc; GO:0031514 motile cilium; GO:0031674 I band; GO:0032991 protein-containing complex; GO:0035686 sperm fibrous sheath; GO:0036126 sperm flagellum; GO:0042995 cell projection; GO:0…	GO:0005488 binding; GO:0005515 protein binding; GO:0051018 protein kinase A binding;
A0A286ZWH7	434	K	3.304	0.00635604	Up	A-kinase anchoring protein 4 OS=Sus scrofa OX=9823 GN=AKAP4 PE=3 SV=2	AKAP4	1	3.1256e-20	267.57	2	QNAADIMEAMLK(1)R	-0.041413	1.59191	1.47868			0.423629	0.505779	cytoplasm,nucleus	K16521	AKAP4; A-kinase anchor protein 4		GO:0000003 reproduction; GO:0006928 movement of cell or subcellular component; GO:0006996 organelle organization; GO:0007154 cell communication; GO:0007165 signal transduction; GO:0007166 cell surface receptor signaling pathway; GO:0007167 enzyme linked receptor protein signaling pathway; GO:0007178 transmembrane receptor protein serine/threonine kinase signaling pathway; GO:0007338 single fertil…	GO:0005622 intracellular; GO:0005623 cell; GO:0005737 cytoplasm; GO:0005856 cytoskeleton; GO:0005929 cilium; GO:0005952 cAMP-dependent protein kinase complex; GO:0030016 myofibril; GO:0030017 sarcomere; GO:0030018 Z disc; GO:0031514 motile cilium; GO:0031674 I band; GO:0032991 protein-containing complex; GO:0035686 sperm fibrous sheath; GO:0036126 sperm flagellum; GO:0042995 cell projection; GO:0…	GO:0005488 binding; GO:0005515 protein binding; GO:0051018 protein kinase A binding;
A0A286ZWH7	374	K	8.493	0.00571529	Up	A-kinase anchoring protein 4 OS=Sus scrofa OX=9823 GN=AKAP4 PE=3 SV=2	AKAP4	1	3.31554e-30	291.57	3	VHSSGK(1)PIPACMVLK(1)R	0.82975	1.14327	1.08706	3.13765	0.172836	0.180637	0.278544	cytoplasm,nucleus	K16521	AKAP4; A-kinase anchor protein 4		GO:0000003 reproduction; GO:0006928 movement of cell or subcellular component; GO:0006996 organelle organization; GO:0007154 cell communication; GO:0007165 signal transduction; GO:0007166 cell surface receptor signaling pathway; GO:0007167 enzyme linked receptor protein signaling pathway; GO:0007178 transmembrane receptor protein serine/threonine kinase signaling pathway; GO:0007338 single fertil…	GO:0005622 intracellular; GO:0005623 cell; GO:0005737 cytoplasm; GO:0005856 cytoskeleton; GO:0005929 cilium; GO:0005952 cAMP-dependent protein kinase complex; GO:0030016 myofibril; GO:0030017 sarcomere; GO:0030018 Z disc; GO:0031514 motile cilium; GO:0031674 I band; GO:0032991 protein-containing complex; GO:0035686 sperm fibrous sheath; GO:0036126 sperm flagellum; GO:0042995 cell projection; GO:0…	GO:0005488 binding; GO:0005515 protein binding; GO:0051018 protein kinase A binding;
A0A286ZWH7	98	K	36.44	0.000778339	Up	A-kinase anchoring protein 4 OS=Sus scrofa OX=9823 GN=AKAP4 PE=3 SV=2	AKAP4	1	5.70431e-39	311.76	2	QDQSK(1)TEGSVCLFK	-1.0167	1.56904	1.30211	2.96859	0.0768466	0.0274697	0.0559411	cytoplasm,nucleus	K16521	AKAP4; A-kinase anchor protein 4		GO:0000003 reproduction; GO:0006928 movement of cell or subcellular component; GO:0006996 organelle organization; GO:0007154 cell communication; GO:0007165 signal transduction; GO:0007166 cell surface receptor signaling pathway; GO:0007167 enzyme linked receptor protein signaling pathway; GO:0007178 transmembrane receptor protein serine/threonine kinase signaling pathway; GO:0007338 single fertil…	GO:0005622 intracellular; GO:0005623 cell; GO:0005737 cytoplasm; GO:0005856 cytoskeleton; GO:0005929 cilium; GO:0005952 cAMP-dependent protein kinase complex; GO:0030016 myofibril; GO:0030017 sarcomere; GO:0030018 Z disc; GO:0031514 motile cilium; GO:0031674 I band; GO:0032991 protein-containing complex; GO:0035686 sperm fibrous sheath; GO:0036126 sperm flagellum; GO:0042995 cell projection; GO:0…	GO:0005488 binding; GO:0005515 protein binding; GO:0051018 protein kinase A binding;
A0A286ZWH7	379	K	19.577	0.000162516	Up	A-kinase anchoring protein 4 OS=Sus scrofa OX=9823 GN=AKAP4 PE=3 SV=2	AKAP4	1	1.42086e-11	187.06	2	VLLK(1)HTK	0.18847	1.85556	1.34935	2.50351	0.118482	0.0781199	0.0949862	cytoplasm,nucleus	K16521	AKAP4; A-kinase anchor protein 4		GO:0000003 reproduction; GO:0006928 movement of cell or subcellular component; GO:0006996 organelle organization; GO:0007154 cell communication; GO:0007165 signal transduction; GO:0007166 cell surface receptor signaling pathway; GO:0007167 enzyme linked receptor protein signaling pathway; GO:0007178 transmembrane receptor protein serine/threonine kinase signaling pathway; GO:0007338 single fertil…	GO:0005622 intracellular; GO:0005623 cell; GO:0005737 cytoplasm; GO:0005856 cytoskeleton; GO:0005929 cilium; GO:0005952 cAMP-dependent protein kinase complex; GO:0030016 myofibril; GO:0030017 sarcomere; GO:0030018 Z disc; GO:0031514 motile cilium; GO:0031674 I band; GO:0032991 protein-containing complex; GO:0035686 sperm fibrous sheath; GO:0036126 sperm flagellum; GO:0042995 cell projection; GO:0…	GO:0005488 binding; GO:0005515 protein binding; GO:0051018 protein kinase A binding;
A0A286ZWH7	365	K	7.696	0.00903594	Up	A-kinase anchoring protein 4 OS=Sus scrofa OX=9823 GN=AKAP4 PE=3 SV=2	AKAP4	1	2.27248e-06	146.79	3	VHSSGK(1)PIPACMVLK(1)R	0.82975	1.39864	0.979601	2.93179	0.142211	0.187541	0.360218	cytoplasm,nucleus	K16521	AKAP4; A-kinase anchor protein 4		GO:0000003 reproduction; GO:0006928 movement of cell or subcellular component; GO:0006996 organelle organization; GO:0007154 cell communication; GO:0007165 signal transduction; GO:0007166 cell surface receptor signaling pathway; GO:0007167 enzyme linked receptor protein signaling pathway; GO:0007178 transmembrane receptor protein serine/threonine kinase signaling pathway; GO:0007338 single fertil…	GO:0005622 intracellular; GO:0005623 cell; GO:0005737 cytoplasm; GO:0005856 cytoskeleton; GO:0005929 cilium; GO:0005952 cAMP-dependent protein kinase complex; GO:0030016 myofibril; GO:0030017 sarcomere; GO:0030018 Z disc; GO:0031514 motile cilium; GO:0031674 I band; GO:0032991 protein-containing complex; GO:0035686 sperm fibrous sheath; GO:0036126 sperm flagellum; GO:0042995 cell projection; GO:0…	GO:0005488 binding; GO:0005515 protein binding; GO:0051018 protein kinase A binding;
A0A286ZWH7	508	K	8.899	0.00288638	Up	A-kinase anchoring protein 4 OS=Sus scrofa OX=9823 GN=AKAP4 PE=3 SV=2	AKAP4	1	1.24709e-11	234.04	3	VGEHILK(1)ESLTMWNQK	-0.48529	1.29837	1.49654	2.59896	0.136651	0.151059	0.318427	cytoplasm,nucleus	K16521	AKAP4; A-kinase anchor protein 4		GO:0000003 reproduction; GO:0006928 movement of cell or subcellular component; GO:0006996 organelle organization; GO:0007154 cell communication; GO:0007165 signal transduction; GO:0007166 cell surface receptor signaling pathway; GO:0007167 enzyme linked receptor protein signaling pathway; GO:0007178 transmembrane receptor protein serine/threonine kinase signaling pathway; GO:0007338 single fertil…	GO:0005622 intracellular; GO:0005623 cell; GO:0005737 cytoplasm; GO:0005856 cytoskeleton; GO:0005929 cilium; GO:0005952 cAMP-dependent protein kinase complex; GO:0030016 myofibril; GO:0030017 sarcomere; GO:0030018 Z disc; GO:0031514 motile cilium; GO:0031674 I band; GO:0032991 protein-containing complex; GO:0035686 sperm fibrous sheath; GO:0036126 sperm flagellum; GO:0042995 cell projection; GO:0…	GO:0005488 binding; GO:0005515 protein binding; GO:0051018 protein kinase A binding;
A0A286ZWH7	143	K	22.885	0.00339062	Up	A-kinase anchoring protein 4 OS=Sus scrofa OX=9823 GN=AKAP4 PE=3 SV=2	AKAP4	1	3.89589e-69	351.03	2	YALGFQHALSPSASSCK(1)HK	0.03494	1.4111	1.80191	1.64546		0.0383301	0.103206	cytoplasm,nucleus	K16521	AKAP4; A-kinase anchor protein 4		GO:0000003 reproduction; GO:0006928 movement of cell or subcellular component; GO:0006996 organelle organization; GO:0007154 cell communication; GO:0007165 signal transduction; GO:0007166 cell surface receptor signaling pathway; GO:0007167 enzyme linked receptor protein signaling pathway; GO:0007178 transmembrane receptor protein serine/threonine kinase signaling pathway; GO:0007338 single fertil…	GO:0005622 intracellular; GO:0005623 cell; GO:0005737 cytoplasm; GO:0005856 cytoskeleton; GO:0005929 cilium; GO:0005952 cAMP-dependent protein kinase complex; GO:0030016 myofibril; GO:0030017 sarcomere; GO:0030018 Z disc; GO:0031514 motile cilium; GO:0031674 I band; GO:0032991 protein-containing complex; GO:0035686 sperm fibrous sheath; GO:0036126 sperm flagellum; GO:0042995 cell projection; GO:0…	GO:0005488 binding; GO:0005515 protein binding; GO:0051018 protein kinase A binding;
A0A287BA45	76	K	5.313	5.65192e-05	Up	Succinate--CoA ligase [GDP-forming] subunit beta, mitochondrial OS=Sus scrofa OX=9823 GN=SUCLG2 PE=3 SV=1	SUCLG2	1	0.00626994	103.7	2	GK(1)GVFSSGLK	-2.2376	1.6977	1.6271	1.72476	0.36339	0.32192	0.265131	mitochondria	K01900	LSC2; succinyl-CoA synthetase beta subunit [EC:6.2.1.4 6.2.1.5]	map00020 Citrate cycle (TCA cycle); map00640 Propanoate metabolism; map01100 Metabolic pathways; map01200 Carbon metabolism	GO:0006082 organic acid metabolic process; GO:0006091 generation of precursor metabolites and energy; GO:0006099 tricarboxylic acid cycle; GO:0006101 citrate metabolic process; GO:0006104 succinyl-CoA metabolic process; GO:0006105 succinate metabolic process; GO:0006139 nucleobase-containing compound metabolic process; GO:0006163 purine nucleotide metabolic process; GO:0006637 acyl-CoA metabolic …	GO:0005622 intracellular; GO:0005623 cell; GO:0005737 cytoplasm; GO:0005739 mitochondrion; GO:0005759 mitochondrial matrix; GO:0005886 plasma membrane; GO:0016020 membrane; GO:0030062 mitochondrial tricarboxylic acid cycle enzyme complex; GO:0031974 membrane-enclosed lumen; GO:0032991 protein-containing complex; GO:0042709 succinate-CoA ligase complex; GO:0043226 organelle; GO:0043227 membrane-bo…	GO:0000166 nucleotide binding; GO:0001882 nucleoside binding; GO:0001883 purine nucleoside binding; GO:0003824 catalytic activity; GO:0004774 succinate-CoA ligase activity; GO:0004776 succinate-CoA ligase (GDP-forming) activity; GO:0004777 succinate-semialdehyde dehydrogenase (NAD+) activity; GO:0005488 binding; GO:0005515 protein binding; GO:0016491 oxidoreductase activity; GO:0016620 oxidoreduc…	PF08442; PF00549	ATP-grasp domain; CoA-ligase	C	KOG1447	GTP-specific succinyl-CoA synthetase, beta subunit
A0A287BA45	254	K	2.573	0.0024603	Up	Succinate--CoA ligase [GDP-forming] subunit beta, mitochondrial OS=Sus scrofa OX=9823 GN=SUCLG2 PE=3 SV=1	SUCLG2	1	2.61085e-08	172.98	2	QK(1)DIFAMDDK	0.20076	1.14501	1.82339	1.35228	0.570803	0.554345	0.554172	mitochondria	K01900	LSC2; succinyl-CoA synthetase beta subunit [EC:6.2.1.4 6.2.1.5]	map00020 Citrate cycle (TCA cycle); map00640 Propanoate metabolism; map01100 Metabolic pathways; map01200 Carbon metabolism	GO:0006082 organic acid metabolic process; GO:0006091 generation of precursor metabolites and energy; GO:0006099 tricarboxylic acid cycle; GO:0006101 citrate metabolic process; GO:0006104 succinyl-CoA metabolic process; GO:0006105 succinate metabolic process; GO:0006139 nucleobase-containing compound metabolic process; GO:0006163 purine nucleotide metabolic process; GO:0006637 acyl-CoA metabolic …	GO:0005622 intracellular; GO:0005623 cell; GO:0005737 cytoplasm; GO:0005739 mitochondrion; GO:0005759 mitochondrial matrix; GO:0005886 plasma membrane; GO:0016020 membrane; GO:0030062 mitochondrial tricarboxylic acid cycle enzyme complex; GO:0031974 membrane-enclosed lumen; GO:0032991 protein-containing complex; GO:0042709 succinate-CoA ligase complex; GO:0043226 organelle; GO:0043227 membrane-bo…	GO:0000166 nucleotide binding; GO:0001882 nucleoside binding; GO:0001883 purine nucleoside binding; GO:0003824 catalytic activity; GO:0004774 succinate-CoA ligase activity; GO:0004776 succinate-CoA ligase (GDP-forming) activity; GO:0004777 succinate-semialdehyde dehydrogenase (NAD+) activity; GO:0005488 binding; GO:0005515 protein binding; GO:0016491 oxidoreductase activity; GO:0016620 oxidoreduc…	PF08442; PF00549	ATP-grasp domain; CoA-ligase	C	KOG1447	GTP-specific succinyl-CoA synthetase, beta subunit
A0A286ZWQ9	70	K	26.486	0.00010365	Up	Protein NipSnap homolog 3A isoform 1 (Fragment)(predicted) OS=Sus scrofa OX=9823 GN=LOC100739365 PE=1 SV=1	LOC100739365	1	1.02158e-05	203.93	2	MNK(1)VFHIWK	-0.65391	1.95367	1.86195	1.96609	0.105731	0.0522125	0.0603457	cytoplasm					GO:0005622 intracellular; GO:0005623 cell; GO:0005737 cytoplasm; GO:0005739 mitochondrion; GO:0043226 organelle; GO:0043227 membrane-bounded organelle; GO:0043229 intracellular organelle; GO:0043231 intracellular membrane-bounded organelle;		PF07978	NIPSNAP	S	KOG2883	NIPSNAP1 protein
A0A286ZWQ9	154	K	34.409	0.000170008	Up	Protein NipSnap homolog 3A isoform 1 (Fragment)(predicted) OS=Sus scrofa OX=9823 GN=LOC100739365 PE=1 SV=1	LOC100739365	1	9.41839e-05	192.12	2	PGGPALWGDAFK(1)R	0.25124	2.0135	1.53555	2.28149	0.0854077	0.0414585	0.0425845	cytoplasm					GO:0005622 intracellular; GO:0005623 cell; GO:0005737 cytoplasm; GO:0005739 mitochondrion; GO:0043226 organelle; GO:0043227 membrane-bounded organelle; GO:0043229 intracellular organelle; GO:0043231 intracellular membrane-bounded organelle;		PF07978	NIPSNAP	S	KOG2883	NIPSNAP1 protein
A0A286ZWQ9	35	K	10.569	0.0113786	Up	Protein NipSnap homolog 3A isoform 1 (Fragment)(predicted) OS=Sus scrofa OX=9823 GN=LOC100739365 PE=1 SV=1	LOC100739365	0.986139	2.33989e-06	142.78	3	TYCLK(0.014)PSK(0.986)MNEFLEEVK(1)K	0.19466	1.58771		2.06654		0.210088	0.135666	cytoplasm					GO:0005622 intracellular; GO:0005623 cell; GO:0005737 cytoplasm; GO:0005739 mitochondrion; GO:0043226 organelle; GO:0043227 membrane-bounded organelle; GO:0043229 intracellular organelle; GO:0043231 intracellular membrane-bounded organelle;		PF07978	NIPSNAP	S	KOG2883	NIPSNAP1 protein
A0A286ZWT0	318	K	3.153	0.0215633	Up	AP complex subunit beta OS=Sus scrofa OX=9823 GN=AP1B1 PE=1 SV=1	AP1B1	1	0.00163052	123.62	2	RPEILK(1)HEMK	0.36295	1.04303	1.35331	1.73097	0.540579		0.332121	cytoplasm	K12392	AP1B1; AP-1 complex subunit beta-1	map04142 Lysosome; map05170 Human immunodeficiency virus 1 infection	GO:0006810 transport; GO:0006886 intracellular protein transport; GO:0007275 multicellular organism development; GO:0007368 determination of left/right symmetry; GO:0007389 pattern specification process; GO:0007507 heart development; GO:0008104 protein localization; GO:0009799 specification of symmetry; GO:0009855 determination of bilateral symmetry; GO:0009987 cellular process; GO:0015031 protei…	GO:0005622 intracellular; GO:0005623 cell; GO:0005737 cytoplasm; GO:0005794 Golgi apparatus; GO:0005802 trans-Golgi network; GO:0005829 cytosol; GO:0012505 endomembrane system; GO:0012506 vesicle membrane; GO:0016020 membrane; GO:0030117 membrane coat; GO:0030118 clathrin coat; GO:0030135 coated vesicle; GO:0030136 clathrin-coated vesicle; GO:0030659 cytoplasmic vesicle membrane; GO:0030662 coate…	GO:0005488 binding; GO:0005515 protein binding; GO:0019899 enzyme binding; GO:0019900 kinase binding; GO:0019901 protein kinase binding; GO:0030276 clathrin binding;	PF02883	Adaptin C-terminal domain	U	KOG1061	Vesicle coat complex AP-1/AP-2/AP-4, beta subunit
A0A287BF92	236	K	11.889	0.0300394	Up	Phospholipase A2 group VI OS=Sus scrofa OX=9823 GN=PLA2G6 PE=4 SV=2	PLA2G6	1	0.000130946	113.47	3	YGASPLHWAK(1)NAEMAR	0.060125	0.922931	0.728278	3.0833	0.147061		0.118426	cytoplasm	K16343	PLA2G6, IPLA2; calcium-independent phospholipase A2 [EC:3.1.1.4]	map00564 Glycerophospholipid metabolism; map00565 Ether lipid metabolism; map00590 Arachidonic acid metabolism; map00591 Linoleic acid metabolism; map00592 alpha-Linolenic acid metabolism; map01100 Metabolic pathways; map04014 Ras signaling pathway; map04270 Vascular smooth muscle contraction; map04666 Fc gamma R-mediated phagocytosis; map04750 Inflammatory mediator regulation of TRP channels	GO:0000003 reproduction; GO:0001932 regulation of protein phosphorylation; GO:0001934 positive regulation of protein phosphorylation; GO:0002252 immune effector process; GO:0002253 activation of immune response; GO:0002376 immune system process; GO:0002429 immune response-activating cell surface receptor signaling pathway; GO:0002431 Fc receptor mediated stimulatory signaling pathway; GO:0002433 …	GO:0005576 extracellular region; GO:0005615 extracellular space; GO:0005622 intracellular; GO:0005623 cell; GO:0005737 cytoplasm; GO:0005739 mitochondrion; GO:0005740 mitochondrial envelope; GO:0005743 mitochondrial inner membrane; GO:0005815 microtubule organizing center; GO:0005829 cytosol; GO:0005856 cytoskeleton; GO:0015630 microtubule cytoskeleton; GO:0016020 membrane; GO:0019866 organelle i…	GO:0003824 catalytic activity; GO:0004620 phospholipase activity; GO:0004623 phospholipase A2 activity; GO:0005488 binding; GO:0005515 protein binding; GO:0016298 lipase activity; GO:0016787 hydrolase activity; GO:0016788 hydrolase activity, acting on ester bonds; GO:0017171 serine hydrolase activity; GO:0019899 enzyme binding; GO:0019900 kinase binding; GO:0019901 protein kinase binding; GO:0043…			I	KOG0513	Ca2+-independent phospholipase A2
A0A286ZX86	450	K	0.027	0.0030389	Down	Carboxylic ester hydrolase OS=Sus scrofa OX=9823 GN=CES5A PE=1 SV=2	CES5A	1	7.33042e-63	344.98	2	KPAFVK(1)ADHTDEIR	0.88562	0.0333249	0.0535539		2.62316	1.05422	1.23573	peroxisome	K15743	CES3_5; carboxylesterase 3/5 [EC:3.1.1.1]				GO:0003824 catalytic activity; GO:0016787 hydrolase activity; GO:0016788 hydrolase activity, acting on ester bonds; GO:0052689 carboxylic ester hydrolase activity;	PF00135	Carboxylesterase family	I	KOG1516	Carboxylesterase and related proteins
A0A286ZXF1	340	K	2.941	0.0375635	Up	Cytochrome-b5 reductase OS=Sus scrofa OX=9823 GN=CYB5R1 PE=1 SV=1	CYB5R1	1	0.00444143	104.94	2	GPSGLLTYTGK(1)GK	0.51333	1.11464	1.02838	2.33449	0.658284	0.551105	0.313103	extracellular	K00326	E1.6.2.2; cytochrome-b5 reductase [EC:1.6.2.2]	map00520 Amino sugar and nucleotide sugar metabolism	GO:0002576 platelet degranulation; GO:0006810 transport; GO:0006811 ion transport; GO:0006820 anion transport; GO:0006887 exocytosis; GO:0008152 metabolic process; GO:0009987 cellular process; GO:0015701 bicarbonate transport; GO:0015711 organic anion transport; GO:0016192 vesicle-mediated transport; GO:0032940 secretion by cell; GO:0045055 regulated exocytosis; GO:0046903 secretion; GO:0051179 l…	GO:0005622 intracellular; GO:0005623 cell; GO:0005737 cytoplasm; GO:0005783 endoplasmic reticulum; GO:0005789 endoplasmic reticulum membrane; GO:0005886 plasma membrane; GO:0012505 endomembrane system; GO:0012506 vesicle membrane; GO:0016020 membrane; GO:0030141 secretory granule; GO:0030659 cytoplasmic vesicle membrane; GO:0030667 secretory granule membrane; GO:0031090 organelle membrane; GO:003…	GO:0003824 catalytic activity; GO:0004128 cytochrome-b5 reductase activity, acting on NAD(P)H; GO:0016491 oxidoreductase activity; GO:0016651 oxidoreductase activity, acting on NAD(P)H; GO:0016653 oxidoreductase activity, acting on NAD(P)H, heme protein as acceptor;	PF00970; PF00175	Oxidoreductase FAD-binding domain; Oxidoreductase NAD-binding domain	CH	KOG0534	NADH-cytochrome b-5 reductase
A0A286ZXF1	236	K	7.101	0.00341036	Up	Cytochrome-b5 reductase OS=Sus scrofa OX=9823 GN=CYB5R1 PE=1 SV=1	CYB5R1	1	1.6671e-08	226.4	2	LLDK(1)TTVNHNTK	0.76904	1.62109	0.986072	2.65218	0.249183	0.201777	0.2897	extracellular	K00326	E1.6.2.2; cytochrome-b5 reductase [EC:1.6.2.2]	map00520 Amino sugar and nucleotide sugar metabolism	GO:0002576 platelet degranulation; GO:0006810 transport; GO:0006811 ion transport; GO:0006820 anion transport; GO:0006887 exocytosis; GO:0008152 metabolic process; GO:0009987 cellular process; GO:0015701 bicarbonate transport; GO:0015711 organic anion transport; GO:0016192 vesicle-mediated transport; GO:0032940 secretion by cell; GO:0045055 regulated exocytosis; GO:0046903 secretion; GO:0051179 l…	GO:0005622 intracellular; GO:0005623 cell; GO:0005737 cytoplasm; GO:0005783 endoplasmic reticulum; GO:0005789 endoplasmic reticulum membrane; GO:0005886 plasma membrane; GO:0012505 endomembrane system; GO:0012506 vesicle membrane; GO:0016020 membrane; GO:0030141 secretory granule; GO:0030659 cytoplasmic vesicle membrane; GO:0030667 secretory granule membrane; GO:0031090 organelle membrane; GO:003…	GO:0003824 catalytic activity; GO:0004128 cytochrome-b5 reductase activity, acting on NAD(P)H; GO:0016491 oxidoreductase activity; GO:0016651 oxidoreductase activity, acting on NAD(P)H; GO:0016653 oxidoreductase activity, acting on NAD(P)H, heme protein as acceptor;	PF00970; PF00175	Oxidoreductase FAD-binding domain; Oxidoreductase NAD-binding domain	CH	KOG0534	NADH-cytochrome b-5 reductase
A0A5G2RE71	304	K	4.851	0.00133816	Up	Actin related protein 2 OS=Sus scrofa OX=9823 GN=ACTR2 PE=1 SV=1	ACTR2	1	6.61194e-18	199.89	3	SEFYK(1)HIVLSGGSTMYPGLPSR	-0.38191	1.56038	1.1821	1.65338	0.305638		0.298503	cytoplasm	K17260	ACTR2, ARP2; actin-related protein 2	map04530 Tight junction; map05135 Yersinia infection	GO:0000003 reproduction; GO:0000280 nuclear division; GO:0000910 cytokinesis; GO:0001775 cell activation; GO:0002252 immune effector process; GO:0002253 activation of immune response; GO:0002263 cell activation involved in immune response; GO:0002274 myeloid leukocyte activation; GO:0002275 myeloid cell activation involved in immune response; GO:0002283 neutrophil activation involved in immune re…	GO:0000323 lytic vacuole; GO:0002102 podosome; GO:0005576 extracellular region; GO:0005622 intracellular; GO:0005623 cell; GO:0005737 cytoplasm; GO:0005764 lysosome; GO:0005766 primary lysosome; GO:0005773 vacuole; GO:0005775 vacuolar lumen; GO:0005829 cytosol; GO:0005856 cytoskeleton; GO:0005885 Arp2/3 protein complex; GO:0005938 cell cortex; GO:0012505 endomembrane system; GO:0014069 postsynapt…	GO:0005198 structural molecule activity; GO:0005200 structural constituent of cytoskeleton; GO:0005488 binding; GO:0005515 protein binding; GO:0008092 cytoskeletal protein binding;			Z	KOG0677	Actin-related protein Arp2/3 complex, subunit Arp2
A0A5G2RKJ7	309	K	0.358	0.00959978	Down	Lactadherin OS=Sus scrofa OX=9823 GN=MFGE8 PE=1 SV=1	MFGE8	1	8.50989e-07	155.42	2	DNTIPNK(1)QITASSFYR	-0.5816	0.440243	0.406081	0.736466	1.74826	1.52707	1.14188	nucleus	K17253	MFGE8; lactadherin					PF00008; PF00754	EGF-like domain; F5/8 type C domain
P33198	244	K	16.832	0.0140722	Up	Isocitrate dehydrogenase [NADP], mitochondrial (Fragment) OS=Sus scrofa OX=9823 GN=IDH2 PE=1 SV=1	IDH2	1	0.000874885	182.29	2	HYK(1)TDFDK	-0.066924	1.41234	1.54003	1.85714	0.158154	0.0323341		cytoplasm	K00031	IDH1, IDH2, icd; isocitrate dehydrogenase [EC:1.1.1.42]	map00020 Citrate cycle (TCA cycle); map00480 Glutathione metabolism; map01100 Metabolic pathways; map01200 Carbon metabolism; map01210 2-Oxocarboxylic acid metabolism; map01230 Biosynthesis of amino acids; map04146 Peroxisome	GO:0002791 regulation of peptide secretion; GO:0002792 negative regulation of peptide secretion; GO:0005975 carbohydrate metabolic process; GO:0006082 organic acid metabolic process; GO:0006091 generation of precursor metabolites and energy; GO:0006099 tricarboxylic acid cycle; GO:0006101 citrate metabolic process; GO:0006102 isocitrate metabolic process; GO:0006103 2-oxoglutarate metabolic proce…	GO:0005622 intracellular; GO:0005623 cell; GO:0005737 cytoplasm; GO:0005739 mitochondrion; GO:0005740 mitochondrial envelope; GO:0005743 mitochondrial inner membrane; GO:0005759 mitochondrial matrix; GO:0005777 peroxisome; GO:0005829 cytosol; GO:0016020 membrane; GO:0019866 organelle inner membrane; GO:0031090 organelle membrane; GO:0031966 mitochondrial membrane; GO:0031967 organelle envelope; G…	GO:0000287 magnesium ion binding; GO:0003824 catalytic activity; GO:0004448 isocitrate dehydrogenase activity; GO:0004450 isocitrate dehydrogenase (NADP+) activity; GO:0005488 binding; GO:0016491 oxidoreductase activity; GO:0016614 oxidoreductase activity, acting on CH-OH group of donors; GO:0016616 oxidoreductase activity, acting on the CH-OH group of donors, NAD or NADP as acceptor; GO:0043167 …	PF00180	Isocitrate/isopropylmalate dehydrogenase	C	KOG1526	NADP-dependent isocitrate dehydrogenase
P33198	124	K	13.745	0.00460705	Up	Isocitrate dehydrogenase [NADP], mitochondrial (Fragment) OS=Sus scrofa OX=9823 GN=IDH2 PE=1 SV=1	IDH2	1	0.00112299	125.53	2	EPIICK(1)NIPR	-0.15798	1.69368	1.62279	2.27661	0.278081	0.0683296	0.0605082	cytoplasm	K00031	IDH1, IDH2, icd; isocitrate dehydrogenase [EC:1.1.1.42]	map00020 Citrate cycle (TCA cycle); map00480 Glutathione metabolism; map01100 Metabolic pathways; map01200 Carbon metabolism; map01210 2-Oxocarboxylic acid metabolism; map01230 Biosynthesis of amino acids; map04146 Peroxisome	GO:0002791 regulation of peptide secretion; GO:0002792 negative regulation of peptide secretion; GO:0005975 carbohydrate metabolic process; GO:0006082 organic acid metabolic process; GO:0006091 generation of precursor metabolites and energy; GO:0006099 tricarboxylic acid cycle; GO:0006101 citrate metabolic process; GO:0006102 isocitrate metabolic process; GO:0006103 2-oxoglutarate metabolic proce…	GO:0005622 intracellular; GO:0005623 cell; GO:0005737 cytoplasm; GO:0005739 mitochondrion; GO:0005740 mitochondrial envelope; GO:0005743 mitochondrial inner membrane; GO:0005759 mitochondrial matrix; GO:0005777 peroxisome; GO:0005829 cytosol; GO:0016020 membrane; GO:0019866 organelle inner membrane; GO:0031090 organelle membrane; GO:0031966 mitochondrial membrane; GO:0031967 organelle envelope; G…	GO:0000287 magnesium ion binding; GO:0003824 catalytic activity; GO:0004448 isocitrate dehydrogenase activity; GO:0004450 isocitrate dehydrogenase (NADP+) activity; GO:0005488 binding; GO:0016491 oxidoreductase activity; GO:0016614 oxidoreductase activity, acting on CH-OH group of donors; GO:0016616 oxidoreductase activity, acting on the CH-OH group of donors, NAD or NADP as acceptor; GO:0043167 …	PF00180	Isocitrate/isopropylmalate dehydrogenase	C	KOG1526	NADP-dependent isocitrate dehydrogenase
P33198	212	K	12.082	0.000725591	Up	Isocitrate dehydrogenase [NADP], mitochondrial (Fragment) OS=Sus scrofa OX=9823 GN=IDH2 PE=1 SV=1	IDH2	1	0.0187401	82.287	2	K(1)WPLYMSTK	0.51555	1.94529	1.50016	2.09589	0.198715	0.0878225	0.172125	cytoplasm	K00031	IDH1, IDH2, icd; isocitrate dehydrogenase [EC:1.1.1.42]	map00020 Citrate cycle (TCA cycle); map00480 Glutathione metabolism; map01100 Metabolic pathways; map01200 Carbon metabolism; map01210 2-Oxocarboxylic acid metabolism; map01230 Biosynthesis of amino acids; map04146 Peroxisome	GO:0002791 regulation of peptide secretion; GO:0002792 negative regulation of peptide secretion; GO:0005975 carbohydrate metabolic process; GO:0006082 organic acid metabolic process; GO:0006091 generation of precursor metabolites and energy; GO:0006099 tricarboxylic acid cycle; GO:0006101 citrate metabolic process; GO:0006102 isocitrate metabolic process; GO:0006103 2-oxoglutarate metabolic proce…	GO:0005622 intracellular; GO:0005623 cell; GO:0005737 cytoplasm; GO:0005739 mitochondrion; GO:0005740 mitochondrial envelope; GO:0005743 mitochondrial inner membrane; GO:0005759 mitochondrial matrix; GO:0005777 peroxisome; GO:0005829 cytosol; GO:0016020 membrane; GO:0019866 organelle inner membrane; GO:0031090 organelle membrane; GO:0031966 mitochondrial membrane; GO:0031967 organelle envelope; G…	GO:0000287 magnesium ion binding; GO:0003824 catalytic activity; GO:0004448 isocitrate dehydrogenase activity; GO:0004450 isocitrate dehydrogenase (NADP+) activity; GO:0005488 binding; GO:0016491 oxidoreductase activity; GO:0016614 oxidoreductase activity, acting on CH-OH group of donors; GO:0016616 oxidoreductase activity, acting on the CH-OH group of donors, NAD or NADP as acceptor; GO:0043167 …	PF00180	Isocitrate/isopropylmalate dehydrogenase	C	KOG1526	NADP-dependent isocitrate dehydrogenase
P33198	268	K	39.981	0.00151274	Up	Isocitrate dehydrogenase [NADP], mitochondrial (Fragment) OS=Sus scrofa OX=9823 GN=IDH2 PE=1 SV=1	IDH2	1	3.25207e-16	189.86	2	LIDDMVAQVLK(1)SSGGFVWACK	0.94173	1.85072	2.12604	1.87683	0.102256	0.0210623	0.0230925	cytoplasm	K00031	IDH1, IDH2, icd; isocitrate dehydrogenase [EC:1.1.1.42]	map00020 Citrate cycle (TCA cycle); map00480 Glutathione metabolism; map01100 Metabolic pathways; map01200 Carbon metabolism; map01210 2-Oxocarboxylic acid metabolism; map01230 Biosynthesis of amino acids; map04146 Peroxisome	GO:0002791 regulation of peptide secretion; GO:0002792 negative regulation of peptide secretion; GO:0005975 carbohydrate metabolic process; GO:0006082 organic acid metabolic process; GO:0006091 generation of precursor metabolites and energy; GO:0006099 tricarboxylic acid cycle; GO:0006101 citrate metabolic process; GO:0006102 isocitrate metabolic process; GO:0006103 2-oxoglutarate metabolic proce…	GO:0005622 intracellular; GO:0005623 cell; GO:0005737 cytoplasm; GO:0005739 mitochondrion; GO:0005740 mitochondrial envelope; GO:0005743 mitochondrial inner membrane; GO:0005759 mitochondrial matrix; GO:0005777 peroxisome; GO:0005829 cytosol; GO:0016020 membrane; GO:0019866 organelle inner membrane; GO:0031090 organelle membrane; GO:0031966 mitochondrial membrane; GO:0031967 organelle envelope; G…	GO:0000287 magnesium ion binding; GO:0003824 catalytic activity; GO:0004448 isocitrate dehydrogenase activity; GO:0004450 isocitrate dehydrogenase (NADP+) activity; GO:0005488 binding; GO:0016491 oxidoreductase activity; GO:0016614 oxidoreductase activity, acting on CH-OH group of donors; GO:0016616 oxidoreductase activity, acting on the CH-OH group of donors, NAD or NADP as acceptor; GO:0043167 …	PF00180	Isocitrate/isopropylmalate dehydrogenase	C	KOG1526	NADP-dependent isocitrate dehydrogenase
P33198	251	K	14.552	0.00308018	Up	Isocitrate dehydrogenase [NADP], mitochondrial (Fragment) OS=Sus scrofa OX=9823 GN=IDH2 PE=1 SV=1	IDH2	1	0.00102623	168.23	2	YK(1)IWYEHR	0.95171	1.63389	1.6516	2.3287	0.239214	0.0916456	0.0549487	cytoplasm	K00031	IDH1, IDH2, icd; isocitrate dehydrogenase [EC:1.1.1.42]	map00020 Citrate cycle (TCA cycle); map00480 Glutathione metabolism; map01100 Metabolic pathways; map01200 Carbon metabolism; map01210 2-Oxocarboxylic acid metabolism; map01230 Biosynthesis of amino acids; map04146 Peroxisome	GO:0002791 regulation of peptide secretion; GO:0002792 negative regulation of peptide secretion; GO:0005975 carbohydrate metabolic process; GO:0006082 organic acid metabolic process; GO:0006091 generation of precursor metabolites and energy; GO:0006099 tricarboxylic acid cycle; GO:0006101 citrate metabolic process; GO:0006102 isocitrate metabolic process; GO:0006103 2-oxoglutarate metabolic proce…	GO:0005622 intracellular; GO:0005623 cell; GO:0005737 cytoplasm; GO:0005739 mitochondrion; GO:0005740 mitochondrial envelope; GO:0005743 mitochondrial inner membrane; GO:0005759 mitochondrial matrix; GO:0005777 peroxisome; GO:0005829 cytosol; GO:0016020 membrane; GO:0019866 organelle inner membrane; GO:0031090 organelle membrane; GO:0031966 mitochondrial membrane; GO:0031967 organelle envelope; G…	GO:0000287 magnesium ion binding; GO:0003824 catalytic activity; GO:0004448 isocitrate dehydrogenase activity; GO:0004450 isocitrate dehydrogenase (NADP+) activity; GO:0005488 binding; GO:0016491 oxidoreductase activity; GO:0016614 oxidoreductase activity, acting on CH-OH group of donors; GO:0016616 oxidoreductase activity, acting on the CH-OH group of donors, NAD or NADP as acceptor; GO:0043167 …	PF00180	Isocitrate/isopropylmalate dehydrogenase	C	KOG1526	NADP-dependent isocitrate dehydrogenase
A0A5G2R4S0	101	K	8.453	0.000592505	Up	ATP synthase subunit b OS=Sus scrofa OX=9823 GN=ATP5PB PE=1 SV=1	ATP5PB	1	0.000182826	187	2	SQQALVQK(1)R	1.5433	1.3181	2.33146	1.71573	0.271491	0.170619	0.192593	mitochondria	K02127	ATPeF0B, ATP5F1, ATP4; F-type H+-transporting ATPase subunit b	map00190 Oxidative phosphorylation; map01100 Metabolic pathways; map04714 Thermogenesis; map05010 Alzheimer disease; map05012 Parkinson disease; map05016 Huntington disease	GO:0006091 generation of precursor metabolites and energy; GO:0006119 oxidative phosphorylation; GO:0006139 nucleobase-containing compound metabolic process; GO:0006163 purine nucleotide metabolic process; GO:0006164 purine nucleotide biosynthetic process; GO:0006725 cellular aromatic compound metabolic process; GO:0006753 nucleoside phosphate metabolic process; GO:0006754 ATP biosynthetic proces…	GO:0000276 mitochondrial proton-transporting ATP synthase complex, coupling factor F(o); GO:0005622 intracellular; GO:0005623 cell; GO:0005634 nucleus; GO:0005654 nucleoplasm; GO:0005737 cytoplasm; GO:0005739 mitochondrion; GO:0005740 mitochondrial envelope; GO:0005743 mitochondrial inner membrane; GO:0005753 mitochondrial proton-transporting ATP synthase complex; GO:0005759 mitochondrial matrix;…	GO:0005215 transporter activity; GO:0022857 transmembrane transporter activity;			C	KOG3976	Mitochondrial F1F0-ATP synthase, subunit b/ATP4
A0A5G2R4S0	160	K	0.12	0.00821277	Down	ATP synthase subunit b OS=Sus scrofa OX=9823 GN=ATP5PB PE=1 SV=1	ATP5PB	1	1.43758e-157	438.97	3	WVEK(1)HVVQSISAQQEK(1)ETIAK	1.5714	0.133763	0.208091	0.300183	3.14244	1.15224	1.06328	mitochondria	K02127	ATPeF0B, ATP5F1, ATP4; F-type H+-transporting ATPase subunit b	map00190 Oxidative phosphorylation; map01100 Metabolic pathways; map04714 Thermogenesis; map05010 Alzheimer disease; map05012 Parkinson disease; map05016 Huntington disease	GO:0006091 generation of precursor metabolites and energy; GO:0006119 oxidative phosphorylation; GO:0006139 nucleobase-containing compound metabolic process; GO:0006163 purine nucleotide metabolic process; GO:0006164 purine nucleotide biosynthetic process; GO:0006725 cellular aromatic compound metabolic process; GO:0006753 nucleoside phosphate metabolic process; GO:0006754 ATP biosynthetic proces…	GO:0000276 mitochondrial proton-transporting ATP synthase complex, coupling factor F(o); GO:0005622 intracellular; GO:0005623 cell; GO:0005634 nucleus; GO:0005654 nucleoplasm; GO:0005737 cytoplasm; GO:0005739 mitochondrion; GO:0005740 mitochondrial envelope; GO:0005743 mitochondrial inner membrane; GO:0005753 mitochondrial proton-transporting ATP synthase complex; GO:0005759 mitochondrial matrix;…	GO:0005215 transporter activity; GO:0022857 transmembrane transporter activity;			C	KOG3976	Mitochondrial F1F0-ATP synthase, subunit b/ATP4
A0A286ZYP6	119	K	18.05	0.00364923	Up	HscB mitochondrial iron-sulfur cluster cochaperone OS=Sus scrofa OX=9823 GN=HSCB PE=4 SV=2	HSCB	1	1.642e-65	351.52	3	DFSEK(1)HSTLVNDAYK	0.5582	1.67533	1.54864	1.59793	0.129031	0.049064		mitochondria	K04082	hscB, HSCB, HSC20; molecular chaperone HscB		GO:0006790 sulfur compound metabolic process; GO:0008152 metabolic process; GO:0009987 cellular process; GO:0016043 cellular component organization; GO:0016226 iron-sulfur cluster assembly; GO:0022607 cellular component assembly; GO:0031163 metallo-sulfur cluster assembly; GO:0044085 cellular component biogenesis; GO:0044237 cellular metabolic process; GO:0051186 cofactor metabolic process; GO:00…	GO:0005622 intracellular; GO:0005623 cell; GO:0005634 nucleus; GO:0005737 cytoplasm; GO:0005739 mitochondrion; GO:0005829 cytosol; GO:0043226 organelle; GO:0043227 membrane-bounded organelle; GO:0043229 intracellular organelle; GO:0043231 intracellular membrane-bounded organelle;	GO:0005488 binding; GO:0005515 protein binding; GO:0042802 identical protein binding;			O	KOG3192	Mitochondrial J-type chaperone
F1SB42	237	K	0.114	0.00732168	Down	Ezrin OS=Sus scrofa OX=9823 GN=EZR PE=1 SV=3	EZR	1	0.0104577	89.9	2	LTPK(1)IGFPWSEIR	-0.37003	0.295774	0.193608	0.124496	3.10277	1.22898	1.05437	cytoplasm	K08007	VIL2; villin 2 (ezrin)	map04530 Tight junction; map04670 Leukocyte transendothelial migration; map04810 Regulation of actin cytoskeleton; map04971 Gastric acid secretion; map05130 Pathogenic Escherichia coli infection; map05205 Proteoglycans in cancer; map05206 MicroRNAs in cancer	GO:0000122 negative regulation of transcription by RNA polymerase II; GO:0000226 microtubule cytoskeleton organization; GO:0000902 cell morphogenesis; GO:0000904 cell morphogenesis involved in differentiation; GO:0001817 regulation of cytokine production; GO:0001818 negative regulation of cytokine production; GO:0001885 endothelial cell development; GO:0001932 regulation of protein phosphorylatio…	GO:0001650 fibrillar center; GO:0001726 ruffle; GO:0001772 immunological synapse; GO:0001931 uropod; GO:0005622 intracellular; GO:0005623 cell; GO:0005634 nucleus; GO:0005730 nucleolus; GO:0005737 cytoplasm; GO:0005768 endosome; GO:0005815 microtubule organizing center; GO:0005829 cytosol; GO:0005856 cytoskeleton; GO:0005884 actin filament; GO:0005886 plasma membrane; GO:0005902 microvillus; GO:0…	GO:0003779 actin binding; GO:0005198 structural molecule activity; GO:0005488 binding; GO:0005515 protein binding; GO:0008017 microtubule binding; GO:0008022 protein C-terminus binding; GO:0008092 cytoskeletal protein binding; GO:0015631 tubulin binding; GO:0019899 enzyme binding; GO:0019900 kinase binding; GO:0019901 protein kinase binding; GO:0019904 protein domain specific binding; GO:0034236 …	PF09379; PF00373; PF09380	FERM N-terminal domain ; FERM central domain; FERM C-terminal PH-like domain	Z	KOG3529	Radixin, moesin and related proteins of the ERM family
A0A286ZYX8	334	K	6.791	0.00515911	Up	Fructose-bisphosphate aldolase OS=Sus scrofa OX=9823 GN=ALDOA PE=1 SV=2	ALDOA	1	0.000276715	155.75	2	AAQEEYVK(1)R	-0.10553	1.26678	1.10946	2.85363	0.319463	0.261684	0.188978	cytoplasm	K01623	ALDO; fructose-bisphosphate aldolase, class I [EC:4.1.2.13]	map00010 Glycolysis / Gluconeogenesis; map00030 Pentose phosphate pathway; map00051 Fructose and mannose metabolism; map01100 Metabolic pathways; map01200 Carbon metabolism; map01230 Biosynthesis of amino acids; map04066 HIF-1 signaling pathway	GO:0005975 carbohydrate metabolic process; GO:0006082 organic acid metabolic process; GO:0006090 pyruvate metabolic process; GO:0006091 generation of precursor metabolites and energy; GO:0006096 glycolytic process; GO:0006139 nucleobase-containing compound metabolic process; GO:0006163 purine nucleotide metabolic process; GO:0006164 purine nucleotide biosynthetic process; GO:0006165 nucleoside di…		GO:0003824 catalytic activity; GO:0004332 fructose-bisphosphate aldolase activity; GO:0016829 lyase activity; GO:0016830 carbon-carbon lyase activity; GO:0016832 aldehyde-lyase activity;	PF00274	Fructose-bisphosphate aldolase class-I	G	KOG1557	Fructose-biphosphate aldolase
A0A286ZYX8	346	K	13.397	8.81668e-05	Up	Fructose-bisphosphate aldolase OS=Sus scrofa OX=9823 GN=ALDOA PE=1 SV=2	ALDOA	1	1.8246e-68	350.18	2	ALANSLACQGK(1)YTPSGK	-0.050506	1.53952	1.70934	2.33438	0.143585	0.159933	0.113241	cytoplasm	K01623	ALDO; fructose-bisphosphate aldolase, class I [EC:4.1.2.13]	map00010 Glycolysis / Gluconeogenesis; map00030 Pentose phosphate pathway; map00051 Fructose and mannose metabolism; map01100 Metabolic pathways; map01200 Carbon metabolism; map01230 Biosynthesis of amino acids; map04066 HIF-1 signaling pathway	GO:0005975 carbohydrate metabolic process; GO:0006082 organic acid metabolic process; GO:0006090 pyruvate metabolic process; GO:0006091 generation of precursor metabolites and energy; GO:0006096 glycolytic process; GO:0006139 nucleobase-containing compound metabolic process; GO:0006163 purine nucleotide metabolic process; GO:0006164 purine nucleotide biosynthetic process; GO:0006165 nucleoside di…		GO:0003824 catalytic activity; GO:0004332 fructose-bisphosphate aldolase activity; GO:0016829 lyase activity; GO:0016830 carbon-carbon lyase activity; GO:0016832 aldehyde-lyase activity;	PF00274	Fructose-bisphosphate aldolase class-I	G	KOG1557	Fructose-biphosphate aldolase
A0A286ZYX8	234	K	2.381	0.0415831	Up	Fructose-bisphosphate aldolase OS=Sus scrofa OX=9823 GN=ALDOA PE=1 SV=2	ALDOA	1	2.95095e-13	158.67	3	ALSDHHIYLEGTLLK(1)PNMVTPGHACTQK	-0.01806	1.89148	0.891527	1.44233	0.394682	0.708463	0.671513	cytoplasm	K01623	ALDO; fructose-bisphosphate aldolase, class I [EC:4.1.2.13]	map00010 Glycolysis / Gluconeogenesis; map00030 Pentose phosphate pathway; map00051 Fructose and mannose metabolism; map01100 Metabolic pathways; map01200 Carbon metabolism; map01230 Biosynthesis of amino acids; map04066 HIF-1 signaling pathway	GO:0005975 carbohydrate metabolic process; GO:0006082 organic acid metabolic process; GO:0006090 pyruvate metabolic process; GO:0006091 generation of precursor metabolites and energy; GO:0006096 glycolytic process; GO:0006139 nucleobase-containing compound metabolic process; GO:0006163 purine nucleotide metabolic process; GO:0006164 purine nucleotide biosynthetic process; GO:0006165 nucleoside di…		GO:0003824 catalytic activity; GO:0004332 fructose-bisphosphate aldolase activity; GO:0016829 lyase activity; GO:0016830 carbon-carbon lyase activity; GO:0016832 aldehyde-lyase activity;	PF00274	Fructose-bisphosphate aldolase class-I	G	KOG1557	Fructose-biphosphate aldolase
F1RGP1	1419	K	13.228	0.00332961	Up	MYB binding protein 1a OS=Sus scrofa OX=9823 GN=MYBBP1A PE=1 SV=3	MYBBP1A	0.969825	0.0083695	120.87	2	K(0.97)NLPQK(0.03)GILGK	0.94679	1.65961		2.83116	0.23169	0.146635	0.130909	nucleus	K02331	POL5, MYBBP1A; DNA polymerase phi [EC:2.7.7.7]		GO:0006091 generation of precursor metabolites and energy; GO:0006355 regulation of transcription, DNA-templated; GO:0006915 apoptotic process; GO:0006950 response to stress; GO:0007154 cell communication; GO:0007165 signal transduction; GO:0007623 circadian rhythm; GO:0008152 metabolic process; GO:0008219 cell death; GO:0009267 cellular response to starvation; GO:0009605 response to external sti…	GO:0005622 intracellular; GO:0005623 cell; GO:0005634 nucleus; GO:0005654 nucleoplasm; GO:0005730 nucleolus; GO:0005737 cytoplasm; GO:0031074 nucleocytoplasmic transport complex; GO:0031974 membrane-enclosed lumen; GO:0031981 nuclear lumen; GO:0032991 protein-containing complex; GO:0042564 NLS-dependent protein nuclear import complex; GO:0043226 organelle; GO:0043227 membrane-bounded organelle; G…	GO:0000976 transcription regulatory region sequence-specific DNA binding; GO:0000977 RNA polymerase II transcription regulatory region sequence-specific DNA binding; GO:0000978 RNA polymerase II cis-regulatory region sequence-specific DNA binding; GO:0000987 cis-regulatory region sequence-specific DNA binding; GO:0001067 regulatory region nucleic acid binding; GO:0003676 nucleic acid binding; GO:…			K	KOG1926	Predicted regulator of rRNA gene transcription (MYB-binding protein)
A0A5G2QFH7	687	K	5.067	0.00589336	Up	Dihydrolipoamide acetyltransferase component of pyruvate dehydrogenase complex OS=Sus scrofa OX=9823 GN=DBT PE=1 SV=1	DBT	1	0.000268764	101.64	4	GDVHK(1)AQIMNVSWSADHR	0.27852	1.71881	1.66683	1.62547	0.545719	0.261155	0.18202	mitochondria	K09699	DBT, bkdB; 2-oxoisovalerate dehydrogenase E2 component (dihydrolipoyl transacylase) [EC:2.3.1.168]	map00280 Valine, leucine and isoleucine degradation; map00640 Propanoate metabolism; map01100 Metabolic pathways		GO:0005622 intracellular; GO:0005623 cell; GO:0005737 cytoplasm; GO:0005739 mitochondrion; GO:0005759 mitochondrial matrix; GO:0005947 mitochondrial alpha-ketoglutarate dehydrogenase complex; GO:0009295 nucleoid; GO:0030062 mitochondrial tricarboxylic acid cycle enzyme complex; GO:0031974 membrane-enclosed lumen; GO:0032991 protein-containing complex; GO:0042645 mitochondrial nucleoid; GO:0043226…	GO:0005488 binding; GO:0005515 protein binding; GO:0019899 enzyme binding; GO:0031625 ubiquitin protein ligase binding; GO:0044389 ubiquitin-like protein ligase binding;	PF00364; PF00198	Biotin-requiring enzyme; 2-oxoacid dehydrogenases acyltransferase (catalytic domain)	C	KOG0558	Dihydrolipoamide transacylase (alpha-keto acid dehydrogenase E2 subunit)
A0A286ZZ98	177	K	0.591	0.0294625	Down	Neutral alpha-glucosidase AB OS=Sus scrofa OX=9823 GN=GANAB PE=1 SV=2	GANAB	1	0.0125003	85.731	2	LK(1)VTEGGDPYR	0.60903	0.799428		0.685997		1.19158	1.32299	plasma membrane	K05546	GANAB; mannosyl-oligosaccharide alpha-1,3-glucosidase [EC:3.2.1.207]	map00510 N-Glycan biosynthesis; map01100 Metabolic pathways; map04141 Protein processing in endoplasmic reticulum	GO:0006491 N-glycan processing; GO:0006807 nitrogen compound metabolic process; GO:0008152 metabolic process; GO:0009100 glycoprotein metabolic process; GO:0009987 cellular process; GO:0019538 protein metabolic process; GO:0043170 macromolecule metabolic process; GO:0044237 cellular metabolic process; GO:0044238 primary metabolic process; GO:0044260 cellular macromolecule metabolic process; GO:00…	GO:0005622 intracellular; GO:0005623 cell; GO:0005737 cytoplasm; GO:0005783 endoplasmic reticulum; GO:0005788 endoplasmic reticulum lumen; GO:0012505 endomembrane system; GO:0017177 glucosidase II complex; GO:0031974 membrane-enclosed lumen; GO:0032991 protein-containing complex; GO:0043226 organelle; GO:0043227 membrane-bounded organelle; GO:0043229 intracellular organelle; GO:0043231 intracellu…	GO:0003824 catalytic activity; GO:0004553 hydrolase activity, hydrolyzing O-glycosyl compounds; GO:0015926 glucosidase activity; GO:0016787 hydrolase activity; GO:0016798 hydrolase activity, acting on glycosyl bonds; GO:0033919 glucan 1,3-alpha-glucosidase activity; GO:0090599 alpha-glucosidase activity; GO:0090600 alpha-1,3-glucosidase activity;	PF13802	Galactose mutarotase-like	GMO	KOG1066	Glucosidase II catalytic (alpha) subunit and related enzymes, glycosyl hydrolase family 31
A0A287ACC1	401	K	10.947	0.00839447	Up	Cilia and flagella associated protein 94 OS=Sus scrofa OX=9823 GN=DNAI7 PE=3 SV=1	DNAI7	1	0.0237768	73.573	2	WDAEAK(1)HWK	1.7458	1.22975	1.05959	2.42363	0.107906		0.179121	cytoplasm	K17580	CASC1; cancer susceptibility candidate protein 1		GO:0006928 movement of cell or subcellular component; GO:0007017 microtubule-based process; GO:0007018 microtubule-based movement; GO:0009987 cellular process; GO:0051012 microtubule sliding;	GO:0005622 intracellular; GO:0005623 cell; GO:0005737 cytoplasm; GO:0005856 cytoskeleton; GO:0005858 axonemal dynein complex; GO:0005875 microtubule associated complex; GO:0005929 cilium; GO:0005930 axoneme; GO:0015630 microtubule cytoskeleton; GO:0030286 dynein complex; GO:0032838 plasma membrane bounded cell projection cytoplasm; GO:0032991 protein-containing complex; GO:0036156 inner dynein ar…	GO:0005488 binding; GO:0005515 protein binding; GO:0008017 microtubule binding; GO:0008092 cytoskeletal protein binding; GO:0015631 tubulin binding; GO:0043014 alpha-tubulin binding; GO:0048487 beta-tubulin binding;
P31346	81	K	0.015	0.00016053	Down	Angiogenin OS=Sus scrofa OX=9823 GN=ANG PE=1 SV=1	ANG	1	0.000271645	181.87	2	SPFQITTCK(1)HK	0.11787	0.0383932	0.0272248	0.0412898		2.65366	2.23943	extracellular	K16631	ANG, RNASE5; angiogenin [EC:3.1.27.-]		GO:0000003 reproduction; GO:0001525 angiogenesis; GO:0001541 ovarian follicle development; GO:0001556 oocyte maturation; GO:0001568 blood vessel development; GO:0001666 response to hypoxia; GO:0001678 cellular glucose homeostasis; GO:0001878 response to yeast; GO:0001890 placenta development; GO:0001932 regulation of protein phosphorylation; GO:0001934 positive regulation of protein phosphorylati…	GO:0005576 extracellular region; GO:0005604 basement membrane; GO:0005615 extracellular space; GO:0005622 intracellular; GO:0005623 cell; GO:0005634 nucleus; GO:0005730 nucleolus; GO:0005737 cytoplasm; GO:0012505 endomembrane system; GO:0030141 secretory granule; GO:0030424 axon; GO:0030426 growth cone; GO:0030427 site of polarized growth; GO:0031012 extracellular matrix; GO:0031410 cytoplasmic v…	GO:0003676 nucleic acid binding; GO:0003677 DNA binding; GO:0003723 RNA binding; GO:0003779 actin binding; GO:0003824 catalytic activity; GO:0004518 nuclease activity; GO:0004519 endonuclease activity; GO:0004540 ribonuclease activity; GO:0005102 signaling receptor binding; GO:0005488 binding; GO:0005507 copper ion binding; GO:0005515 protein binding; GO:0005539 glycosaminoglycan binding; GO:0008…	PF00074	Pancreatic ribonuclease
A0A287AXR5	138	K	0.334	0.0137691	Down	Tyrosine 3-monooxygenase/tryptophan 5-monooxygenase activation protein zeta OS=Sus scrofa OX=9823 GN=YWHAZ PE=1 SV=1	YWHAZ	1	0.000280395	138.71	2	YLAEVAAGDDK(1)K	0.47817	0.492321	0.485972	0.69137	1.98971	1.34063		cytoplasm	K16197	YWHAB_Q_Z; 14-3-3 protein beta/theta/zeta	map04013 MAPK signaling pathway - fly; map04110 Cell cycle; map04114 Oocyte meiosis; map04151 PI3K-Akt signaling pathway; map04212 Longevity regulating pathway - worm; map04390 Hippo signaling pathway; map04391 Hippo signaling pathway - fly; map05160 Hepatitis C; map05161 Hepatitis B; map05203 Viral carcinogenesis				PF00244	14-3-3 protein	O	KOG0841	Multifunctional chaperone (14-3-3 family)
A0A287A1F2	62	K	7.724	0.0325077	Up	Protein FAM228B isoform a OS=Sus scrofa OX=9823 GN=LOC100738909 PE=3 SV=1	LOC100738909	1	0.00330646	90.614	3	YLK(1)HHEFLNAR	-0.11866	2.87019	1.31675		0.468574	0.212409	0.132074	cytoplasm
F1SBB1	15	K	7.95	0.0109625	Up	Calcium binding tyrosine phosphorylation regulated OS=Sus scrofa OX=9823 GN=CABYR PE=1 SV=3	CABYR	1	3.11396e-05	138.89	2	LVIPYGLK(1)TLLEGVSR	0.48115	1.20776	0.832072	3.28982	0.180939	0.22065	0.268767	cytoplasm				GO:0000003 reproduction; GO:0003006 developmental process involved in reproduction; GO:0003341 cilium movement; GO:0003351 epithelial cilium movement involved in extracellular fluid movement; GO:0006928 movement of cell or subcellular component; GO:0007017 microtubule-based process; GO:0007018 microtubule-based movement; GO:0007154 cell communication; GO:0007165 signal transduction; GO:0007276 ga…	GO:0005622 intracellular; GO:0005623 cell; GO:0005634 nucleus; GO:0005737 cytoplasm; GO:0005829 cytosol; GO:0005856 cytoskeleton; GO:0005929 cilium; GO:0031514 motile cilium; GO:0035686 sperm fibrous sheath; GO:0036126 sperm flagellum; GO:0042995 cell projection; GO:0043226 organelle; GO:0043227 membrane-bounded organelle; GO:0043228 non-membrane-bounded organelle; GO:0043229 intracellular organe…	GO:0005488 binding; GO:0005509 calcium ion binding; GO:0005515 protein binding; GO:0017124 SH3 domain binding; GO:0019899 enzyme binding; GO:0019904 protein domain specific binding; GO:0043167 ion binding; GO:0043169 cation binding; GO:0046872 metal ion binding; GO:0046982 protein heterodimerization activity; GO:0046983 protein dimerization activity;	PF02197	Regulatory subunit of type II PKA R-subunit
F1SBB1	98	K	4.451	0.000963192	Up	Calcium binding tyrosine phosphorylation regulated OS=Sus scrofa OX=9823 GN=CABYR PE=1 SV=3	CABYR	1	1.92403e-09	238.32	2	TPVVSQEPK(1)R	0.78669	1.41827	1.419	2.06203	0.341942	0.453563	0.305197	cytoplasm				GO:0000003 reproduction; GO:0003006 developmental process involved in reproduction; GO:0003341 cilium movement; GO:0003351 epithelial cilium movement involved in extracellular fluid movement; GO:0006928 movement of cell or subcellular component; GO:0007017 microtubule-based process; GO:0007018 microtubule-based movement; GO:0007154 cell communication; GO:0007165 signal transduction; GO:0007276 ga…	GO:0005622 intracellular; GO:0005623 cell; GO:0005634 nucleus; GO:0005737 cytoplasm; GO:0005829 cytosol; GO:0005856 cytoskeleton; GO:0005929 cilium; GO:0031514 motile cilium; GO:0035686 sperm fibrous sheath; GO:0036126 sperm flagellum; GO:0042995 cell projection; GO:0043226 organelle; GO:0043227 membrane-bounded organelle; GO:0043228 non-membrane-bounded organelle; GO:0043229 intracellular organe…	GO:0005488 binding; GO:0005509 calcium ion binding; GO:0005515 protein binding; GO:0017124 SH3 domain binding; GO:0019899 enzyme binding; GO:0019904 protein domain specific binding; GO:0043167 ion binding; GO:0043169 cation binding; GO:0046872 metal ion binding; GO:0046982 protein heterodimerization activity; GO:0046983 protein dimerization activity;	PF02197	Regulatory subunit of type II PKA R-subunit
A0A5G2QGK1	297	K	5.298	0.00560968	Up	Tubulin beta chain OS=Sus scrofa OX=9823 GN=TUBB4B PE=1 SV=1	TUBB4B	1	1.3308e-38	276.63	3	ALTVPELTQQMFDAK(1)NMMAACDPR	3.4661	1.58078	1.13678	2.32981	0.436533	0.198463	0.317634	cytoplasm,nucleus	K07375	TUBB; tubulin beta	map04145 Phagosome; map04540 Gap junction; map05130 Pathogenic Escherichia coli infection	GO:0000086 G2/M transition of mitotic cell cycle; GO:0000278 mitotic cell cycle; GO:0001775 cell activation; GO:0001906 cell killing; GO:0001909 leukocyte mediated cytotoxicity; GO:0002228 natural killer cell mediated immunity; GO:0002252 immune effector process; GO:0002263 cell activation involved in immune response; GO:0002274 myeloid leukocyte activation; GO:0002275 myeloid cell activation inv…	GO:0000323 lytic vacuole; GO:0005576 extracellular region; GO:0005622 intracellular; GO:0005623 cell; GO:0005737 cytoplasm; GO:0005764 lysosome; GO:0005766 primary lysosome; GO:0005773 vacuole; GO:0005775 vacuolar lumen; GO:0005829 cytosol; GO:0005856 cytoskeleton; GO:0005874 microtubule; GO:0012505 endomembrane system; GO:0015630 microtubule cytoskeleton; GO:0030141 secretory granule; GO:0031410…	GO:0000166 nucleotide binding; GO:0001882 nucleoside binding; GO:0001883 purine nucleoside binding; GO:0003676 nucleic acid binding; GO:0003723 RNA binding; GO:0003725 double-stranded RNA binding; GO:0005102 signaling receptor binding; GO:0005488 binding; GO:0005515 protein binding; GO:0005525 GTP binding; GO:0017076 purine nucleotide binding; GO:0019001 guanyl nucleotide binding; GO:0032549 ribo…	PF00091; PF03953	Tubulin/FtsZ family, GTPase domain; Tubulin C-terminal domain	Z	KOG1375	Beta tubulin
A0A5G2QGK1	336	K	5.477	0.0214025	Up	Tubulin beta chain OS=Sus scrofa OX=9823 GN=TUBB4B PE=1 SV=1	TUBB4B	1	1.4668e-25	202.17	3	EVDEQMLNVQNK(1)NSSYFVEWIPNNVK	0.2218	1.7465	0.920376	2.40672	0.578085	0.167538	0.180776	cytoplasm,nucleus	K07375	TUBB; tubulin beta	map04145 Phagosome; map04540 Gap junction; map05130 Pathogenic Escherichia coli infection	GO:0000086 G2/M transition of mitotic cell cycle; GO:0000278 mitotic cell cycle; GO:0001775 cell activation; GO:0001906 cell killing; GO:0001909 leukocyte mediated cytotoxicity; GO:0002228 natural killer cell mediated immunity; GO:0002252 immune effector process; GO:0002263 cell activation involved in immune response; GO:0002274 myeloid leukocyte activation; GO:0002275 myeloid cell activation inv…	GO:0000323 lytic vacuole; GO:0005576 extracellular region; GO:0005622 intracellular; GO:0005623 cell; GO:0005737 cytoplasm; GO:0005764 lysosome; GO:0005766 primary lysosome; GO:0005773 vacuole; GO:0005775 vacuolar lumen; GO:0005829 cytosol; GO:0005856 cytoskeleton; GO:0005874 microtubule; GO:0012505 endomembrane system; GO:0015630 microtubule cytoskeleton; GO:0030141 secretory granule; GO:0031410…	GO:0000166 nucleotide binding; GO:0001882 nucleoside binding; GO:0001883 purine nucleoside binding; GO:0003676 nucleic acid binding; GO:0003723 RNA binding; GO:0003725 double-stranded RNA binding; GO:0005102 signaling receptor binding; GO:0005488 binding; GO:0005515 protein binding; GO:0005525 GTP binding; GO:0017076 purine nucleotide binding; GO:0019001 guanyl nucleotide binding; GO:0032549 ribo…	PF00091; PF03953	Tubulin/FtsZ family, GTPase domain; Tubulin C-terminal domain	Z	KOG1375	Beta tubulin
A0A5G2QGK1	350	K	11.364	0.0357481	Up	Tubulin beta chain OS=Sus scrofa OX=9823 GN=TUBB4B PE=1 SV=1	TUBB4B	1	4.79316e-62	329.65	2	NSSYFVEWIPNNVK(1)TAVCDIPPR	0.23423	1.15309	0.753552	2.8163	0.212877		0.064183	cytoplasm,nucleus	K07375	TUBB; tubulin beta	map04145 Phagosome; map04540 Gap junction; map05130 Pathogenic Escherichia coli infection	GO:0000086 G2/M transition of mitotic cell cycle; GO:0000278 mitotic cell cycle; GO:0001775 cell activation; GO:0001906 cell killing; GO:0001909 leukocyte mediated cytotoxicity; GO:0002228 natural killer cell mediated immunity; GO:0002252 immune effector process; GO:0002263 cell activation involved in immune response; GO:0002274 myeloid leukocyte activation; GO:0002275 myeloid cell activation inv…	GO:0000323 lytic vacuole; GO:0005576 extracellular region; GO:0005622 intracellular; GO:0005623 cell; GO:0005737 cytoplasm; GO:0005764 lysosome; GO:0005766 primary lysosome; GO:0005773 vacuole; GO:0005775 vacuolar lumen; GO:0005829 cytosol; GO:0005856 cytoskeleton; GO:0005874 microtubule; GO:0012505 endomembrane system; GO:0015630 microtubule cytoskeleton; GO:0030141 secretory granule; GO:0031410…	GO:0000166 nucleotide binding; GO:0001882 nucleoside binding; GO:0001883 purine nucleoside binding; GO:0003676 nucleic acid binding; GO:0003723 RNA binding; GO:0003725 double-stranded RNA binding; GO:0005102 signaling receptor binding; GO:0005488 binding; GO:0005515 protein binding; GO:0005525 GTP binding; GO:0017076 purine nucleotide binding; GO:0019001 guanyl nucleotide binding; GO:0032549 ribo…	PF00091; PF03953	Tubulin/FtsZ family, GTPase domain; Tubulin C-terminal domain	Z	KOG1375	Beta tubulin
A0A5G2QGK1	58	K	6.046	0.00924907	Up	Tubulin beta chain OS=Sus scrofa OX=9823 GN=TUBB4B PE=1 SV=1	TUBB4B	1	7.08926e-52	319.37	2	INVYYNEATGGK(1)YVPR	0.44775	1.49518	1.33768	2.31564	0.514004	0.16492	0.172565	cytoplasm,nucleus	K07375	TUBB; tubulin beta	map04145 Phagosome; map04540 Gap junction; map05130 Pathogenic Escherichia coli infection	GO:0000086 G2/M transition of mitotic cell cycle; GO:0000278 mitotic cell cycle; GO:0001775 cell activation; GO:0001906 cell killing; GO:0001909 leukocyte mediated cytotoxicity; GO:0002228 natural killer cell mediated immunity; GO:0002252 immune effector process; GO:0002263 cell activation involved in immune response; GO:0002274 myeloid leukocyte activation; GO:0002275 myeloid cell activation inv…	GO:0000323 lytic vacuole; GO:0005576 extracellular region; GO:0005622 intracellular; GO:0005623 cell; GO:0005737 cytoplasm; GO:0005764 lysosome; GO:0005766 primary lysosome; GO:0005773 vacuole; GO:0005775 vacuolar lumen; GO:0005829 cytosol; GO:0005856 cytoskeleton; GO:0005874 microtubule; GO:0012505 endomembrane system; GO:0015630 microtubule cytoskeleton; GO:0030141 secretory granule; GO:0031410…	GO:0000166 nucleotide binding; GO:0001882 nucleoside binding; GO:0001883 purine nucleoside binding; GO:0003676 nucleic acid binding; GO:0003723 RNA binding; GO:0003725 double-stranded RNA binding; GO:0005102 signaling receptor binding; GO:0005488 binding; GO:0005515 protein binding; GO:0005525 GTP binding; GO:0017076 purine nucleotide binding; GO:0019001 guanyl nucleotide binding; GO:0032549 ribo…	PF00091; PF03953	Tubulin/FtsZ family, GTPase domain; Tubulin C-terminal domain	Z	KOG1375	Beta tubulin
A0A287A2J9	464	K	6.23	0.0154545	Up	Cullin 3 OS=Sus scrofa OX=9823 GN=CUL3 PE=1 SV=2	CUL3	1	2.33733e-05	202.56	2	LK(1)TECGCQFTSK	0.19572	1.65867	0.946626	2.56486	0.498666	0.159481	0.171701	extracellular	K03869	CUL3; cullin 3	map04120 Ubiquitin mediated proteolysis; map04340 Hedgehog signaling pathway; map04341 Hedgehog signaling pathway - fly	GO:0000070 mitotic sister chromatid segregation; GO:0000082 G1/S transition of mitotic cell cycle; GO:0000165 MAPK cascade; GO:0000209 protein polyubiquitination; GO:0000278 mitotic cell cycle; GO:0000280 nuclear division; GO:0000819 sister chromatid segregation; GO:0006464 cellular protein modification process; GO:0006468 protein phosphorylation; GO:0006508 proteolysis; GO:0006511 ubiquitin-depe…	GO:0000151 ubiquitin ligase complex; GO:0000922 spindle pole; GO:0005622 intracellular; GO:0005623 cell; GO:0005634 nucleus; GO:0005654 nucleoplasm; GO:0005737 cytoplasm; GO:0005819 spindle; GO:0005827 polar microtubule; GO:0005829 cytosol; GO:0005856 cytoskeleton; GO:0005874 microtubule; GO:0005876 spindle microtubule; GO:0005929 cilium; GO:0015630 microtubule cytoskeleton; GO:0031461 cullin-RIN…	GO:0005102 signaling receptor binding; GO:0005112 Notch binding; GO:0005488 binding; GO:0005515 protein binding; GO:0019899 enzyme binding; GO:0019904 protein domain specific binding; GO:0031208 POZ domain binding; GO:0031625 ubiquitin protein ligase binding; GO:0044389 ubiquitin-like protein ligase binding;	PF10557	Cullin protein neddylation domain	D	KOG2166	Cullins
A0A287A2X6	230	K	6.742	0.0357366	Up	Fructose transporter OS=Sus scrofa OX=9823 GN=SLC2A5 PE=1 SV=2	SLC2A5	1	9.98148e-10	234.99	2	KDEAAAK(1)NALR	-1.1537		1.14363	2.9464	0.499212	0.200867	0.209885	plasma membrane	K08143	SLC2A5, GLUT5; MFS transporter, SP family, solute carrier family 2 (facilitated glucose/fructose transporter), member 5	map04973 Carbohydrate digestion and absorption	GO:0001775 cell activation; GO:0002252 immune effector process; GO:0002263 cell activation involved in immune response; GO:0002274 myeloid leukocyte activation; GO:0002275 myeloid cell activation involved in immune response; GO:0002283 neutrophil activation involved in immune response; GO:0002366 leukocyte activation involved in immune response; GO:0002376 immune system process; GO:0002443 leukoc…	GO:0005622 intracellular; GO:0005623 cell; GO:0005737 cytoplasm; GO:0005886 plasma membrane; GO:0005887 integral component of plasma membrane; GO:0012505 endomembrane system; GO:0012506 vesicle membrane; GO:0016020 membrane; GO:0016021 integral component of membrane; GO:0016324 apical plasma membrane; GO:0030141 secretory granule; GO:0030659 cytoplasmic vesicle membrane; GO:0030667 secretory gran…	GO:0005215 transporter activity; GO:0005353 fructose transmembrane transporter activity; GO:0005355 glucose transmembrane transporter activity; GO:0005488 binding; GO:0015144 carbohydrate transmembrane transporter activity; GO:0015145 monosaccharide transmembrane transporter activity; GO:0015149 hexose transmembrane transporter activity; GO:0022857 transmembrane transporter activity; GO:0030246 c…			G	KOG0569	Permease of the major facilitator superfamily
A0A287A2X6	479	K	6.497	0.00478953	Up	Fructose transporter OS=Sus scrofa OX=9823 GN=SLC2A5 PE=1 SV=2	SLC2A5	1	0.000293412	172.1	2	MNK(1)VSEVHPEK	1.8449	0.908434	1.71446	2.5768	0.306606	0.22463	0.26907	plasma membrane	K08143	SLC2A5, GLUT5; MFS transporter, SP family, solute carrier family 2 (facilitated glucose/fructose transporter), member 5	map04973 Carbohydrate digestion and absorption	GO:0001775 cell activation; GO:0002252 immune effector process; GO:0002263 cell activation involved in immune response; GO:0002274 myeloid leukocyte activation; GO:0002275 myeloid cell activation involved in immune response; GO:0002283 neutrophil activation involved in immune response; GO:0002366 leukocyte activation involved in immune response; GO:0002376 immune system process; GO:0002443 leukoc…	GO:0005622 intracellular; GO:0005623 cell; GO:0005737 cytoplasm; GO:0005886 plasma membrane; GO:0005887 integral component of plasma membrane; GO:0012505 endomembrane system; GO:0012506 vesicle membrane; GO:0016020 membrane; GO:0016021 integral component of membrane; GO:0016324 apical plasma membrane; GO:0030141 secretory granule; GO:0030659 cytoplasmic vesicle membrane; GO:0030667 secretory gran…	GO:0005215 transporter activity; GO:0005353 fructose transmembrane transporter activity; GO:0005355 glucose transmembrane transporter activity; GO:0005488 binding; GO:0015144 carbohydrate transmembrane transporter activity; GO:0015145 monosaccharide transmembrane transporter activity; GO:0015149 hexose transmembrane transporter activity; GO:0022857 transmembrane transporter activity; GO:0030246 c…			G	KOG0569	Permease of the major facilitator superfamily
A0A287A2X6	465	K	4.987	0.0300201	Up	Fructose transporter OS=Sus scrofa OX=9823 GN=SLC2A5 PE=1 SV=2	SLC2A5	1	1.02194e-05	180.18	2	SK(1)TFIEINQIFTK	-0.2334	1.15732	1.10408	2.7365	0.578949	0.285588	0.137561	plasma membrane	K08143	SLC2A5, GLUT5; MFS transporter, SP family, solute carrier family 2 (facilitated glucose/fructose transporter), member 5	map04973 Carbohydrate digestion and absorption	GO:0001775 cell activation; GO:0002252 immune effector process; GO:0002263 cell activation involved in immune response; GO:0002274 myeloid leukocyte activation; GO:0002275 myeloid cell activation involved in immune response; GO:0002283 neutrophil activation involved in immune response; GO:0002366 leukocyte activation involved in immune response; GO:0002376 immune system process; GO:0002443 leukoc…	GO:0005622 intracellular; GO:0005623 cell; GO:0005737 cytoplasm; GO:0005886 plasma membrane; GO:0005887 integral component of plasma membrane; GO:0012505 endomembrane system; GO:0012506 vesicle membrane; GO:0016020 membrane; GO:0016021 integral component of membrane; GO:0016324 apical plasma membrane; GO:0030141 secretory granule; GO:0030659 cytoplasmic vesicle membrane; GO:0030667 secretory gran…	GO:0005215 transporter activity; GO:0005353 fructose transmembrane transporter activity; GO:0005355 glucose transmembrane transporter activity; GO:0005488 binding; GO:0015144 carbohydrate transmembrane transporter activity; GO:0015145 monosaccharide transmembrane transporter activity; GO:0015149 hexose transmembrane transporter activity; GO:0022857 transmembrane transporter activity; GO:0030246 c…			G	KOG0569	Permease of the major facilitator superfamily
A0A287A2Y4	72	K	7.357	0.00117247	Up	ATP synthase subunit d, mitochondrial OS=Sus scrofa OX=9823 GN=ATP5PD PE=1 SV=1	ATP5PD	1	0.000261988	138.98	2	ATVAK(1)AGLVDDFEK(1)K	0.28055	1.91653	1.58483	1.78071	0.363496	0.166587	0.187844	cytoplasm	K02138	ATPeF0D, ATP5H, ATP7; F-type H+-transporting ATPase subunit d	map00190 Oxidative phosphorylation; map01100 Metabolic pathways; map04714 Thermogenesis; map05010 Alzheimer disease; map05012 Parkinson disease; map05016 Huntington disease	GO:0006091 generation of precursor metabolites and energy; GO:0006119 oxidative phosphorylation; GO:0006139 nucleobase-containing compound metabolic process; GO:0006163 purine nucleotide metabolic process; GO:0006164 purine nucleotide biosynthetic process; GO:0006725 cellular aromatic compound metabolic process; GO:0006753 nucleoside phosphate metabolic process; GO:0006754 ATP biosynthetic proces…	GO:0000274 mitochondrial proton-transporting ATP synthase, stator stalk; GO:0000276 mitochondrial proton-transporting ATP synthase complex, coupling factor F(o); GO:0005622 intracellular; GO:0005623 cell; GO:0005634 nucleus; GO:0005654 nucleoplasm; GO:0005737 cytoplasm; GO:0005739 mitochondrion; GO:0005740 mitochondrial envelope; GO:0005743 mitochondrial inner membrane; GO:0005753 mitochondrial p…	GO:0005215 transporter activity; GO:0008324 cation transmembrane transporter activity; GO:0015075 ion transmembrane transporter activity; GO:0015077 monovalent inorganic cation transmembrane transporter activity; GO:0015078 proton transmembrane transporter activity; GO:0015318 inorganic molecular entity transmembrane transporter activity; GO:0022857 transmembrane transporter activity; GO:0022890 …			C	KOG3366	Mitochondrial F1F0-ATP synthase, subunit d/ATP7
A0A287A2Y4	32	K	2.864	0.02406	Up	ATP synthase subunit d, mitochondrial OS=Sus scrofa OX=9823 GN=ATP5PD PE=1 SV=1	ATP5PD	1	1.40463e-30	286.61	3	AIANSLK(1)SWNETLSTR	-0.32778	1.11065	1.46278	1.87393	0.688397	0.284448	0.579791	cytoplasm	K02138	ATPeF0D, ATP5H, ATP7; F-type H+-transporting ATPase subunit d	map00190 Oxidative phosphorylation; map01100 Metabolic pathways; map04714 Thermogenesis; map05010 Alzheimer disease; map05012 Parkinson disease; map05016 Huntington disease	GO:0006091 generation of precursor metabolites and energy; GO:0006119 oxidative phosphorylation; GO:0006139 nucleobase-containing compound metabolic process; GO:0006163 purine nucleotide metabolic process; GO:0006164 purine nucleotide biosynthetic process; GO:0006725 cellular aromatic compound metabolic process; GO:0006753 nucleoside phosphate metabolic process; GO:0006754 ATP biosynthetic proces…	GO:0000274 mitochondrial proton-transporting ATP synthase, stator stalk; GO:0000276 mitochondrial proton-transporting ATP synthase complex, coupling factor F(o); GO:0005622 intracellular; GO:0005623 cell; GO:0005634 nucleus; GO:0005654 nucleoplasm; GO:0005737 cytoplasm; GO:0005739 mitochondrion; GO:0005740 mitochondrial envelope; GO:0005743 mitochondrial inner membrane; GO:0005753 mitochondrial p…	GO:0005215 transporter activity; GO:0008324 cation transmembrane transporter activity; GO:0015075 ion transmembrane transporter activity; GO:0015077 monovalent inorganic cation transmembrane transporter activity; GO:0015078 proton transmembrane transporter activity; GO:0015318 inorganic molecular entity transmembrane transporter activity; GO:0022857 transmembrane transporter activity; GO:0022890 …			C	KOG3366	Mitochondrial F1F0-ATP synthase, subunit d/ATP7
A0A287A2Y4	63	K	1.771	0.0320767	Up	ATP synthase subunit d, mitochondrial OS=Sus scrofa OX=9823 GN=ATP5PD PE=1 SV=1	ATP5PD	1	1.91006e-05	177.1	2	ATVAK(1)AGLVDDFEK(1)K	0.28055	1.16394	1.45512	1.21576	0.967286	0.659947	0.537943	cytoplasm	K02138	ATPeF0D, ATP5H, ATP7; F-type H+-transporting ATPase subunit d	map00190 Oxidative phosphorylation; map01100 Metabolic pathways; map04714 Thermogenesis; map05010 Alzheimer disease; map05012 Parkinson disease; map05016 Huntington disease	GO:0006091 generation of precursor metabolites and energy; GO:0006119 oxidative phosphorylation; GO:0006139 nucleobase-containing compound metabolic process; GO:0006163 purine nucleotide metabolic process; GO:0006164 purine nucleotide biosynthetic process; GO:0006725 cellular aromatic compound metabolic process; GO:0006753 nucleoside phosphate metabolic process; GO:0006754 ATP biosynthetic proces…	GO:0000274 mitochondrial proton-transporting ATP synthase, stator stalk; GO:0000276 mitochondrial proton-transporting ATP synthase complex, coupling factor F(o); GO:0005622 intracellular; GO:0005623 cell; GO:0005634 nucleus; GO:0005654 nucleoplasm; GO:0005737 cytoplasm; GO:0005739 mitochondrion; GO:0005740 mitochondrial envelope; GO:0005743 mitochondrial inner membrane; GO:0005753 mitochondrial p…	GO:0005215 transporter activity; GO:0008324 cation transmembrane transporter activity; GO:0015075 ion transmembrane transporter activity; GO:0015077 monovalent inorganic cation transmembrane transporter activity; GO:0015078 proton transmembrane transporter activity; GO:0015318 inorganic molecular entity transmembrane transporter activity; GO:0022857 transmembrane transporter activity; GO:0022890 …			C	KOG3366	Mitochondrial F1F0-ATP synthase, subunit d/ATP7
A0A287A2Y4	148	K	6.912	0.00528176	Up	ATP synthase subunit d, mitochondrial OS=Sus scrofa OX=9823 GN=ATP5PD PE=1 SV=1	ATP5PD	1	7.26341e-05	145.29	3	K(1)K(1)YPYWPHRPIESL	0.044469	1.10346	1.89271	1.56397	0.26881	0.171044		cytoplasm	K02138	ATPeF0D, ATP5H, ATP7; F-type H+-transporting ATPase subunit d	map00190 Oxidative phosphorylation; map01100 Metabolic pathways; map04714 Thermogenesis; map05010 Alzheimer disease; map05012 Parkinson disease; map05016 Huntington disease	GO:0006091 generation of precursor metabolites and energy; GO:0006119 oxidative phosphorylation; GO:0006139 nucleobase-containing compound metabolic process; GO:0006163 purine nucleotide metabolic process; GO:0006164 purine nucleotide biosynthetic process; GO:0006725 cellular aromatic compound metabolic process; GO:0006753 nucleoside phosphate metabolic process; GO:0006754 ATP biosynthetic proces…	GO:0000274 mitochondrial proton-transporting ATP synthase, stator stalk; GO:0000276 mitochondrial proton-transporting ATP synthase complex, coupling factor F(o); GO:0005622 intracellular; GO:0005623 cell; GO:0005634 nucleus; GO:0005654 nucleoplasm; GO:0005737 cytoplasm; GO:0005739 mitochondrion; GO:0005740 mitochondrial envelope; GO:0005743 mitochondrial inner membrane; GO:0005753 mitochondrial p…	GO:0005215 transporter activity; GO:0008324 cation transmembrane transporter activity; GO:0015075 ion transmembrane transporter activity; GO:0015077 monovalent inorganic cation transmembrane transporter activity; GO:0015078 proton transmembrane transporter activity; GO:0015318 inorganic molecular entity transmembrane transporter activity; GO:0022857 transmembrane transporter activity; GO:0022890 …			C	KOG3366	Mitochondrial F1F0-ATP synthase, subunit d/ATP7
A0A287A2Y4	149	K	15.105	0.000870008	Up	ATP synthase subunit d, mitochondrial OS=Sus scrofa OX=9823 GN=ATP5PD PE=1 SV=1	ATP5PD	1	7.26341e-05	193.96	2	K(1)YPYWPHRPIESL	0.72367	1.63458	2.00677	1.98609	0.20609	0.0759565	0.0905098	cytoplasm	K02138	ATPeF0D, ATP5H, ATP7; F-type H+-transporting ATPase subunit d	map00190 Oxidative phosphorylation; map01100 Metabolic pathways; map04714 Thermogenesis; map05010 Alzheimer disease; map05012 Parkinson disease; map05016 Huntington disease	GO:0006091 generation of precursor metabolites and energy; GO:0006119 oxidative phosphorylation; GO:0006139 nucleobase-containing compound metabolic process; GO:0006163 purine nucleotide metabolic process; GO:0006164 purine nucleotide biosynthetic process; GO:0006725 cellular aromatic compound metabolic process; GO:0006753 nucleoside phosphate metabolic process; GO:0006754 ATP biosynthetic proces…	GO:0000274 mitochondrial proton-transporting ATP synthase, stator stalk; GO:0000276 mitochondrial proton-transporting ATP synthase complex, coupling factor F(o); GO:0005622 intracellular; GO:0005623 cell; GO:0005634 nucleus; GO:0005654 nucleoplasm; GO:0005737 cytoplasm; GO:0005739 mitochondrion; GO:0005740 mitochondrial envelope; GO:0005743 mitochondrial inner membrane; GO:0005753 mitochondrial p…	GO:0005215 transporter activity; GO:0008324 cation transmembrane transporter activity; GO:0015075 ion transmembrane transporter activity; GO:0015077 monovalent inorganic cation transmembrane transporter activity; GO:0015078 proton transmembrane transporter activity; GO:0015318 inorganic molecular entity transmembrane transporter activity; GO:0022857 transmembrane transporter activity; GO:0022890 …			C	KOG3366	Mitochondrial F1F0-ATP synthase, subunit d/ATP7
A0A287A2Y4	123	K	7.854	0.00734106	Up	ATP synthase subunit d, mitochondrial OS=Sus scrofa OX=9823 GN=ATP5PD PE=1 SV=1	ATP5PD	1	5.87873e-09	158.17	3	MK(1)NIIPFDQMTIEDLNEVFPETK	0.0019063	1.2836	1.58666	2.45207	0.412609	0.113884	0.151176	cytoplasm	K02138	ATPeF0D, ATP5H, ATP7; F-type H+-transporting ATPase subunit d	map00190 Oxidative phosphorylation; map01100 Metabolic pathways; map04714 Thermogenesis; map05010 Alzheimer disease; map05012 Parkinson disease; map05016 Huntington disease	GO:0006091 generation of precursor metabolites and energy; GO:0006119 oxidative phosphorylation; GO:0006139 nucleobase-containing compound metabolic process; GO:0006163 purine nucleotide metabolic process; GO:0006164 purine nucleotide biosynthetic process; GO:0006725 cellular aromatic compound metabolic process; GO:0006753 nucleoside phosphate metabolic process; GO:0006754 ATP biosynthetic proces…	GO:0000274 mitochondrial proton-transporting ATP synthase, stator stalk; GO:0000276 mitochondrial proton-transporting ATP synthase complex, coupling factor F(o); GO:0005622 intracellular; GO:0005623 cell; GO:0005634 nucleus; GO:0005654 nucleoplasm; GO:0005737 cytoplasm; GO:0005739 mitochondrion; GO:0005740 mitochondrial envelope; GO:0005743 mitochondrial inner membrane; GO:0005753 mitochondrial p…	GO:0005215 transporter activity; GO:0008324 cation transmembrane transporter activity; GO:0015075 ion transmembrane transporter activity; GO:0015077 monovalent inorganic cation transmembrane transporter activity; GO:0015078 proton transmembrane transporter activity; GO:0015318 inorganic molecular entity transmembrane transporter activity; GO:0022857 transmembrane transporter activity; GO:0022890 …			C	KOG3366	Mitochondrial F1F0-ATP synthase, subunit d/ATP7
A0A287A2Y4	144	K	10.705	0.00508917	Up	ATP synthase subunit d, mitochondrial OS=Sus scrofa OX=9823 GN=ATP5PD PE=1 SV=1	ATP5PD	1	9.44138e-18	188.58	3	NIIPFDQMTIEDLNEVFPETK(1)LDK	0.53789	1.96876	2.12742	1.39122	0.324482	0.114467	0.0736532	cytoplasm	K02138	ATPeF0D, ATP5H, ATP7; F-type H+-transporting ATPase subunit d	map00190 Oxidative phosphorylation; map01100 Metabolic pathways; map04714 Thermogenesis; map05010 Alzheimer disease; map05012 Parkinson disease; map05016 Huntington disease	GO:0006091 generation of precursor metabolites and energy; GO:0006119 oxidative phosphorylation; GO:0006139 nucleobase-containing compound metabolic process; GO:0006163 purine nucleotide metabolic process; GO:0006164 purine nucleotide biosynthetic process; GO:0006725 cellular aromatic compound metabolic process; GO:0006753 nucleoside phosphate metabolic process; GO:0006754 ATP biosynthetic proces…	GO:0000274 mitochondrial proton-transporting ATP synthase, stator stalk; GO:0000276 mitochondrial proton-transporting ATP synthase complex, coupling factor F(o); GO:0005622 intracellular; GO:0005623 cell; GO:0005634 nucleus; GO:0005654 nucleoplasm; GO:0005737 cytoplasm; GO:0005739 mitochondrion; GO:0005740 mitochondrial envelope; GO:0005743 mitochondrial inner membrane; GO:0005753 mitochondrial p…	GO:0005215 transporter activity; GO:0008324 cation transmembrane transporter activity; GO:0015075 ion transmembrane transporter activity; GO:0015077 monovalent inorganic cation transmembrane transporter activity; GO:0015078 proton transmembrane transporter activity; GO:0015318 inorganic molecular entity transmembrane transporter activity; GO:0022857 transmembrane transporter activity; GO:0022890 …			C	KOG3366	Mitochondrial F1F0-ATP synthase, subunit d/ATP7
A0A287A2Y4	99	K	6.393	0.00356443	Up	ATP synthase subunit d, mitochondrial OS=Sus scrofa OX=9823 GN=ATP5PD PE=1 SV=1	ATP5PD	1	6.46991e-80	355.67	2	YTALVDAEEQEDVK(1)R	2.9863	1.64586	1.67357	1.86901	0.455108	0.164364	0.192083	cytoplasm	K02138	ATPeF0D, ATP5H, ATP7; F-type H+-transporting ATPase subunit d	map00190 Oxidative phosphorylation; map01100 Metabolic pathways; map04714 Thermogenesis; map05010 Alzheimer disease; map05012 Parkinson disease; map05016 Huntington disease	GO:0006091 generation of precursor metabolites and energy; GO:0006119 oxidative phosphorylation; GO:0006139 nucleobase-containing compound metabolic process; GO:0006163 purine nucleotide metabolic process; GO:0006164 purine nucleotide biosynthetic process; GO:0006725 cellular aromatic compound metabolic process; GO:0006753 nucleoside phosphate metabolic process; GO:0006754 ATP biosynthetic proces…	GO:0000274 mitochondrial proton-transporting ATP synthase, stator stalk; GO:0000276 mitochondrial proton-transporting ATP synthase complex, coupling factor F(o); GO:0005622 intracellular; GO:0005623 cell; GO:0005634 nucleus; GO:0005654 nucleoplasm; GO:0005737 cytoplasm; GO:0005739 mitochondrion; GO:0005740 mitochondrial envelope; GO:0005743 mitochondrial inner membrane; GO:0005753 mitochondrial p…	GO:0005215 transporter activity; GO:0008324 cation transmembrane transporter activity; GO:0015075 ion transmembrane transporter activity; GO:0015077 monovalent inorganic cation transmembrane transporter activity; GO:0015078 proton transmembrane transporter activity; GO:0015318 inorganic molecular entity transmembrane transporter activity; GO:0022857 transmembrane transporter activity; GO:0022890 …			C	KOG3366	Mitochondrial F1F0-ATP synthase, subunit d/ATP7
A0A287A3S5	419	K	12.806	0.0108239	Up	Tektin OS=Sus scrofa OX=9823 GN=TEKT4 PE=3 SV=1	TEKT4	1	1.51407e-13	244.01	2	DLAVK(1)TNSLFINR	0.09173	1.44813	0.916578	2.38787	0.166523	0.0808966		cytoplasm	K18631	TEKT4; tektin-4		GO:0000003 reproduction; GO:0001539 cilium or flagellum-dependent cell motility; GO:0003341 cilium movement; GO:0006928 movement of cell or subcellular component; GO:0006996 organelle organization; GO:0007017 microtubule-based process; GO:0007018 microtubule-based movement; GO:0009987 cellular process; GO:0016043 cellular component organization; GO:0022414 reproductive process; GO:0022607 cellula…	GO:0005622 intracellular; GO:0005623 cell; GO:0005634 nucleus; GO:0005929 cilium; GO:0031514 motile cilium; GO:0036126 sperm flagellum; GO:0042995 cell projection; GO:0043226 organelle; GO:0043227 membrane-bounded organelle; GO:0043229 intracellular organelle; GO:0043231 intracellular membrane-bounded organelle; GO:0097225 sperm midpiece; GO:0097228 sperm principal piece; GO:0097729 9+2 motile ci…				Z	KOG2685	Cystoskeletal protein Tektin
A0A287A3S5	218	K	9.461	0.00358398	Up	Tektin OS=Sus scrofa OX=9823 GN=TEKT4 PE=3 SV=1	TEKT4	1	4.44431e-46	282.6	3	ETCEMGWSDK(1)VEAYNIDEACCR	-1.1944	1.23857	1.19597	2.23634	0.158491		0.170628	cytoplasm	K18631	TEKT4; tektin-4		GO:0000003 reproduction; GO:0001539 cilium or flagellum-dependent cell motility; GO:0003341 cilium movement; GO:0006928 movement of cell or subcellular component; GO:0006996 organelle organization; GO:0007017 microtubule-based process; GO:0007018 microtubule-based movement; GO:0009987 cellular process; GO:0016043 cellular component organization; GO:0022414 reproductive process; GO:0022607 cellula…	GO:0005622 intracellular; GO:0005623 cell; GO:0005634 nucleus; GO:0005929 cilium; GO:0031514 motile cilium; GO:0036126 sperm flagellum; GO:0042995 cell projection; GO:0043226 organelle; GO:0043227 membrane-bounded organelle; GO:0043229 intracellular organelle; GO:0043231 intracellular membrane-bounded organelle; GO:0097225 sperm midpiece; GO:0097228 sperm principal piece; GO:0097729 9+2 motile ci…				Z	KOG2685	Cystoskeletal protein Tektin
A0A287A3S5	317	K	13.716	0.00143311	Up	Tektin OS=Sus scrofa OX=9823 GN=TEKT4 PE=3 SV=1	TEKT4	1	0.000430341	164.71	2	HK(1)LEYHLR	-1.5191	1.39365	1.46817	2.73045	0.206355	0.115789	0.0855747	cytoplasm	K18631	TEKT4; tektin-4		GO:0000003 reproduction; GO:0001539 cilium or flagellum-dependent cell motility; GO:0003341 cilium movement; GO:0006928 movement of cell or subcellular component; GO:0006996 organelle organization; GO:0007017 microtubule-based process; GO:0007018 microtubule-based movement; GO:0009987 cellular process; GO:0016043 cellular component organization; GO:0022414 reproductive process; GO:0022607 cellula…	GO:0005622 intracellular; GO:0005623 cell; GO:0005634 nucleus; GO:0005929 cilium; GO:0031514 motile cilium; GO:0036126 sperm flagellum; GO:0042995 cell projection; GO:0043226 organelle; GO:0043227 membrane-bounded organelle; GO:0043229 intracellular organelle; GO:0043231 intracellular membrane-bounded organelle; GO:0097225 sperm midpiece; GO:0097228 sperm principal piece; GO:0097729 9+2 motile ci…				Z	KOG2685	Cystoskeletal protein Tektin
A0A287A3S5	191	K	6.292	0.000312484	Up	Tektin OS=Sus scrofa OX=9823 GN=TEKT4 PE=3 SV=1	TEKT4	1	0.00256796	138.54	2	NIQELLK(1)R	0.21348	1.69283	1.60921	1.87512	0.363587	0.225203	0.234053	cytoplasm	K18631	TEKT4; tektin-4		GO:0000003 reproduction; GO:0001539 cilium or flagellum-dependent cell motility; GO:0003341 cilium movement; GO:0006928 movement of cell or subcellular component; GO:0006996 organelle organization; GO:0007017 microtubule-based process; GO:0007018 microtubule-based movement; GO:0009987 cellular process; GO:0016043 cellular component organization; GO:0022414 reproductive process; GO:0022607 cellula…	GO:0005622 intracellular; GO:0005623 cell; GO:0005634 nucleus; GO:0005929 cilium; GO:0031514 motile cilium; GO:0036126 sperm flagellum; GO:0042995 cell projection; GO:0043226 organelle; GO:0043227 membrane-bounded organelle; GO:0043229 intracellular organelle; GO:0043231 intracellular membrane-bounded organelle; GO:0097225 sperm midpiece; GO:0097228 sperm principal piece; GO:0097729 9+2 motile ci…				Z	KOG2685	Cystoskeletal protein Tektin
A0A287A3S5	114	K	23.948	0.00108972	Up	Tektin OS=Sus scrofa OX=9823 GN=TEKT4 PE=3 SV=1	TEKT4	1	7.33063e-68	336.37	2	VGEHLQDTHCWK(1)SELQR	-0.44875	1.65227	1.18144	2.92579	0.119775	0.0472285	0.073495	cytoplasm	K18631	TEKT4; tektin-4		GO:0000003 reproduction; GO:0001539 cilium or flagellum-dependent cell motility; GO:0003341 cilium movement; GO:0006928 movement of cell or subcellular component; GO:0006996 organelle organization; GO:0007017 microtubule-based process; GO:0007018 microtubule-based movement; GO:0009987 cellular process; GO:0016043 cellular component organization; GO:0022414 reproductive process; GO:0022607 cellula…	GO:0005622 intracellular; GO:0005623 cell; GO:0005634 nucleus; GO:0005929 cilium; GO:0031514 motile cilium; GO:0036126 sperm flagellum; GO:0042995 cell projection; GO:0043226 organelle; GO:0043227 membrane-bounded organelle; GO:0043229 intracellular organelle; GO:0043231 intracellular membrane-bounded organelle; GO:0097225 sperm midpiece; GO:0097228 sperm principal piece; GO:0097729 9+2 motile ci…				Z	KOG2685	Cystoskeletal protein Tektin
P50578	263	K	2.451	0.0105	Up	Aldo-keto reductase family 1 member A1 OS=Sus scrofa OX=9823 GN=AKR1A1 PE=1 SV=3	AKR1A1	1	0.0014477	123.63	2	VICIPK(1)SVTPSR	0.036574	1.14625	1.43403	1.68123	0.713453	0.408296	0.616732	cytoplasm	K00002	AKR1A1, adh; alcohol dehydrogenase (NADP+) [EC:1.1.1.2]	map00010 Glycolysis / Gluconeogenesis; map00040 Pentose and glucuronate interconversions; map00561 Glycerolipid metabolism; map01100 Metabolic pathways	GO:0005975 carbohydrate metabolic process; GO:0005996 monosaccharide metabolic process; GO:0006006 glucose metabolic process; GO:0006063 uronic acid metabolic process; GO:0006064 glucuronate catabolic process; GO:0006081 cellular aldehyde metabolic process; GO:0006082 organic acid metabolic process; GO:0006091 generation of precursor metabolites and energy; GO:0006732 coenzyme metabolic process; …	GO:0005622 intracellular; GO:0005623 cell; GO:0005737 cytoplasm; GO:0005829 cytosol; GO:0005886 plasma membrane; GO:0016020 membrane; GO:0016324 apical plasma membrane; GO:0045177 apical part of cell; GO:0071944 cell periphery; GO:0098590 plasma membrane region;	GO:0003824 catalytic activity; GO:0004032 alditol:NADP+ 1-oxidoreductase activity; GO:0004033 aldo-keto reductase (NADP) activity; GO:0008106 alcohol dehydrogenase (NADP+) activity; GO:0009055 electron transfer activity; GO:0016491 oxidoreductase activity; GO:0016614 oxidoreductase activity, acting on CH-OH group of donors; GO:0016616 oxidoreductase activity, acting on the CH-OH group of donors, …	PF00248	Aldo/keto reductase family	S	KOG1577	Aldo/keto reductase family proteins
A0A287A4I2	128	K	5.34	0.00205054	Up	Radial spoke head component 1 OS=Sus scrofa OX=9823 GN=RSPH1 PE=4 SV=2	RSPH1	1	0.000161275	146.79	2	FLNK(1)NPVGPGK	0.52202	1.4233	1.6029	2.02743	0.460834	0.256954	0.228574	cytoplasm	K19755	RSPH1; radial spoke head protein 1		GO:0000003 reproduction; GO:0000226 microtubule cytoskeleton organization; GO:0001578 microtubule bundle formation; GO:0003006 developmental process involved in reproduction; GO:0006996 organelle organization; GO:0007010 cytoskeleton organization; GO:0007017 microtubule-based process; GO:0007276 gamete generation; GO:0007281 germ cell development; GO:0007283 spermatogenesis; GO:0007286 spermatid …	GO:0000228 nuclear chromosome; GO:0000793 condensed chromosome; GO:0000794 condensed nuclear chromosome; GO:0001520 outer dense fiber; GO:0005622 intracellular; GO:0005623 cell; GO:0005634 nucleus; GO:0005694 chromosome; GO:0005737 cytoplasm; GO:0005819 spindle; GO:0005856 cytoskeleton; GO:0005929 cilium; GO:0015630 microtubule cytoskeleton; GO:0031514 motile cilium; GO:0031974 membrane-enclosed …				S	KOG0231	Junctional membrane complex protein Junctophilin and related MORN repeat proteins
A0A287A4I2	135	K	6.629	0.00206297	Up	Radial spoke head component 1 OS=Sus scrofa OX=9823 GN=RSPH1 PE=4 SV=2	RSPH1	1	7.45686e-21	222.06	3	NPVGPGK(1)YVFDIGCEQHGEYR	-0.43577	1.85322	1.26773	2.09254	0.38313	0.222722	0.180661	cytoplasm	K19755	RSPH1; radial spoke head protein 1		GO:0000003 reproduction; GO:0000226 microtubule cytoskeleton organization; GO:0001578 microtubule bundle formation; GO:0003006 developmental process involved in reproduction; GO:0006996 organelle organization; GO:0007010 cytoskeleton organization; GO:0007017 microtubule-based process; GO:0007276 gamete generation; GO:0007281 germ cell development; GO:0007283 spermatogenesis; GO:0007286 spermatid …	GO:0000228 nuclear chromosome; GO:0000793 condensed chromosome; GO:0000794 condensed nuclear chromosome; GO:0001520 outer dense fiber; GO:0005622 intracellular; GO:0005623 cell; GO:0005634 nucleus; GO:0005694 chromosome; GO:0005737 cytoplasm; GO:0005819 spindle; GO:0005856 cytoskeleton; GO:0005929 cilium; GO:0015630 microtubule cytoskeleton; GO:0031514 motile cilium; GO:0031974 membrane-enclosed …				S	KOG0231	Junctional membrane complex protein Junctophilin and related MORN repeat proteins
A0A287A4I2	38	K	10.558	0.0037319	Up	Radial spoke head component 1 OS=Sus scrofa OX=9823 GN=RSPH1 PE=4 SV=2	RSPH1	1	4.43029e-39	311.71	3	K(1)HGQGTFIYPDGSR	0.39587	1.59499	1.043	2.84287	0.26844	0.127124	0.123578	cytoplasm	K19755	RSPH1; radial spoke head protein 1		GO:0000003 reproduction; GO:0000226 microtubule cytoskeleton organization; GO:0001578 microtubule bundle formation; GO:0003006 developmental process involved in reproduction; GO:0006996 organelle organization; GO:0007010 cytoskeleton organization; GO:0007017 microtubule-based process; GO:0007276 gamete generation; GO:0007281 germ cell development; GO:0007283 spermatogenesis; GO:0007286 spermatid …	GO:0000228 nuclear chromosome; GO:0000793 condensed chromosome; GO:0000794 condensed nuclear chromosome; GO:0001520 outer dense fiber; GO:0005622 intracellular; GO:0005623 cell; GO:0005634 nucleus; GO:0005694 chromosome; GO:0005737 cytoplasm; GO:0005819 spindle; GO:0005856 cytoskeleton; GO:0005929 cilium; GO:0015630 microtubule cytoskeleton; GO:0031514 motile cilium; GO:0031974 membrane-enclosed …				S	KOG0231	Junctional membrane complex protein Junctophilin and related MORN repeat proteins
A0A287A4I2	35	K	12.396	0.00411583	Up	Radial spoke head component 1 OS=Sus scrofa OX=9823 GN=RSPH1 PE=4 SV=2	RSPH1	1	0.00054582	143.12	2	YIGEYVK(1)NK	0.10335	1.30571	1.32682	2.91957	0.259379	0.103955	0.0845625	cytoplasm	K19755	RSPH1; radial spoke head protein 1		GO:0000003 reproduction; GO:0000226 microtubule cytoskeleton organization; GO:0001578 microtubule bundle formation; GO:0003006 developmental process involved in reproduction; GO:0006996 organelle organization; GO:0007010 cytoskeleton organization; GO:0007017 microtubule-based process; GO:0007276 gamete generation; GO:0007281 germ cell development; GO:0007283 spermatogenesis; GO:0007286 spermatid …	GO:0000228 nuclear chromosome; GO:0000793 condensed chromosome; GO:0000794 condensed nuclear chromosome; GO:0001520 outer dense fiber; GO:0005622 intracellular; GO:0005623 cell; GO:0005634 nucleus; GO:0005694 chromosome; GO:0005737 cytoplasm; GO:0005819 spindle; GO:0005856 cytoskeleton; GO:0005929 cilium; GO:0015630 microtubule cytoskeleton; GO:0031514 motile cilium; GO:0031974 membrane-enclosed …				S	KOG0231	Junctional membrane complex protein Junctophilin and related MORN repeat proteins
A0A287A4I2	105	K	3.477	0.00839303	Up	Radial spoke head component 1 OS=Sus scrofa OX=9823 GN=RSPH1 PE=4 SV=2	RSPH1	1	7.67174e-32	264.92	3	YVGTWVK(1)GQQEGAAELIHLNHR	0.22136	1.50107	1.11414	2.04448	0.590065	0.44394	0.306301	cytoplasm	K19755	RSPH1; radial spoke head protein 1		GO:0000003 reproduction; GO:0000226 microtubule cytoskeleton organization; GO:0001578 microtubule bundle formation; GO:0003006 developmental process involved in reproduction; GO:0006996 organelle organization; GO:0007010 cytoskeleton organization; GO:0007017 microtubule-based process; GO:0007276 gamete generation; GO:0007281 germ cell development; GO:0007283 spermatogenesis; GO:0007286 spermatid …	GO:0000228 nuclear chromosome; GO:0000793 condensed chromosome; GO:0000794 condensed nuclear chromosome; GO:0001520 outer dense fiber; GO:0005622 intracellular; GO:0005623 cell; GO:0005634 nucleus; GO:0005694 chromosome; GO:0005737 cytoplasm; GO:0005819 spindle; GO:0005856 cytoskeleton; GO:0005929 cilium; GO:0015630 microtubule cytoskeleton; GO:0031514 motile cilium; GO:0031974 membrane-enclosed …				S	KOG0231	Junctional membrane complex protein Junctophilin and related MORN repeat proteins
A0A287BNN0	943	K	27.417	0.00200897	Up	Coiled-coil domain containing 88A OS=Sus scrofa OX=9823 GN=CCDC88A PE=1 SV=2	CCDC88A	0.98591	0.0263334	40.937	4	LK(0.986)EQYQQLDITSTK(0.014)LNNQCELLSQLK	1.8641	2.2522	0.72164	2.81501	0.0882417	0.0683799	0.0545223	nucleus				GO:0000226 microtubule cytoskeleton organization; GO:0001932 regulation of protein phosphorylation; GO:0001934 positive regulation of protein phosphorylation; GO:0006275 regulation of DNA replication; GO:0006810 transport; GO:0006928 movement of cell or subcellular component; GO:0006996 organelle organization; GO:0007010 cytoskeleton organization; GO:0007017 microtubule-based process; GO:0007154 …	GO:0005622 intracellular; GO:0005623 cell; GO:0005737 cytoplasm; GO:0005783 endoplasmic reticulum; GO:0005794 Golgi apparatus; GO:0005813 centrosome; GO:0005814 centriole; GO:0005815 microtubule organizing center; GO:0005829 cytosol; GO:0005856 cytoskeleton; GO:0005886 plasma membrane; GO:0005929 cilium; GO:0012505 endomembrane system; GO:0015630 microtubule cytoskeleton; GO:0016020 membrane; GO:…	GO:0003779 actin binding; GO:0005488 binding; GO:0005515 protein binding; GO:0005543 phospholipid binding; GO:0008017 microtubule binding; GO:0008092 cytoskeletal protein binding; GO:0008289 lipid binding; GO:0015631 tubulin binding; GO:0019899 enzyme binding; GO:0019900 kinase binding; GO:0019901 protein kinase binding; GO:0035091 phosphatidylinositol binding; GO:0042802 identical protein bindin…			S	KOG4643	Uncharacterized coiled-coil protein
A0A287A4T2	62	K	9.069	0.000518841	Up	Electron transfer flavoprotein subunit alpha OS=Sus scrofa OX=9823 GN=ETFA PE=1 SV=1	ETFA	1	1.2519e-05	213.63	2	CDK(1)VAQDLCK	-2.6839	1.54968	1.89905	1.95537	0.262268	0.204278	0.129349	mitochondria	K03522	fixB, etfA; electron transfer flavoprotein alpha subunit		GO:0006082 organic acid metabolic process; GO:0006091 generation of precursor metabolites and energy; GO:0006629 lipid metabolic process; GO:0006631 fatty acid metabolic process; GO:0006635 fatty acid beta-oxidation; GO:0008152 metabolic process; GO:0009056 catabolic process; GO:0009062 fatty acid catabolic process; GO:0009987 cellular process; GO:0016042 lipid catabolic process; GO:0016054 organ…	GO:0005622 intracellular; GO:0005623 cell; GO:0005737 cytoplasm; GO:0005739 mitochondrion; GO:0005759 mitochondrial matrix; GO:0017133 mitochondrial electron transfer flavoprotein complex; GO:0031974 membrane-enclosed lumen; GO:0032991 protein-containing complex; GO:0043226 organelle; GO:0043227 membrane-bounded organelle; GO:0043229 intracellular organelle; GO:0043231 intracellular membrane-boun…	GO:0000166 nucleotide binding; GO:0003824 catalytic activity; GO:0005488 binding; GO:0009055 electron transfer activity; GO:0016491 oxidoreductase activity; GO:0036094 small molecule binding; GO:0043167 ion binding; GO:0043168 anion binding; GO:0048037 cofactor binding; GO:0050660 flavin adenine dinucleotide binding; GO:0050662 coenzyme binding; GO:0097159 organic cyclic compound binding; GO:1901…	PF01012; PF00766	Electron transfer flavoprotein domain; Electron transfer flavoprotein FAD-binding domain	C	KOG3954	Electron transfer flavoprotein, alpha subunit
A0A287A4T2	226	K	13.531	0.00864294	Up	Electron transfer flavoprotein subunit alpha OS=Sus scrofa OX=9823 GN=ETFA PE=1 SV=1	ETFA	1	0.00164111	130.28	2	GLK(1)SGENFK	-0.44293	1.69282	1.26589	1.80651	0.177744	0.0570285		mitochondria	K03522	fixB, etfA; electron transfer flavoprotein alpha subunit		GO:0006082 organic acid metabolic process; GO:0006091 generation of precursor metabolites and energy; GO:0006629 lipid metabolic process; GO:0006631 fatty acid metabolic process; GO:0006635 fatty acid beta-oxidation; GO:0008152 metabolic process; GO:0009056 catabolic process; GO:0009062 fatty acid catabolic process; GO:0009987 cellular process; GO:0016042 lipid catabolic process; GO:0016054 organ…	GO:0005622 intracellular; GO:0005623 cell; GO:0005737 cytoplasm; GO:0005739 mitochondrion; GO:0005759 mitochondrial matrix; GO:0017133 mitochondrial electron transfer flavoprotein complex; GO:0031974 membrane-enclosed lumen; GO:0032991 protein-containing complex; GO:0043226 organelle; GO:0043227 membrane-bounded organelle; GO:0043229 intracellular organelle; GO:0043231 intracellular membrane-boun…	GO:0000166 nucleotide binding; GO:0003824 catalytic activity; GO:0005488 binding; GO:0009055 electron transfer activity; GO:0016491 oxidoreductase activity; GO:0036094 small molecule binding; GO:0043167 ion binding; GO:0043168 anion binding; GO:0048037 cofactor binding; GO:0050660 flavin adenine dinucleotide binding; GO:0050662 coenzyme binding; GO:0097159 organic cyclic compound binding; GO:1901…	PF01012; PF00766	Electron transfer flavoprotein domain; Electron transfer flavoprotein FAD-binding domain	C	KOG3954	Electron transfer flavoprotein, alpha subunit
A0A287A4T2	206	K	16.793	0.00455571	Up	Electron transfer flavoprotein subunit alpha OS=Sus scrofa OX=9823 GN=ETFA PE=1 SV=1	ETFA	1	4.79311e-39	316.12	2	LTK(1)SDRPELTGAK	0.40837	2.11774	1.41519	2.12986	0.237872	0.0488995	0.0504375	mitochondria	K03522	fixB, etfA; electron transfer flavoprotein alpha subunit		GO:0006082 organic acid metabolic process; GO:0006091 generation of precursor metabolites and energy; GO:0006629 lipid metabolic process; GO:0006631 fatty acid metabolic process; GO:0006635 fatty acid beta-oxidation; GO:0008152 metabolic process; GO:0009056 catabolic process; GO:0009062 fatty acid catabolic process; GO:0009987 cellular process; GO:0016042 lipid catabolic process; GO:0016054 organ…	GO:0005622 intracellular; GO:0005623 cell; GO:0005737 cytoplasm; GO:0005739 mitochondrion; GO:0005759 mitochondrial matrix; GO:0017133 mitochondrial electron transfer flavoprotein complex; GO:0031974 membrane-enclosed lumen; GO:0032991 protein-containing complex; GO:0043226 organelle; GO:0043227 membrane-bounded organelle; GO:0043229 intracellular organelle; GO:0043231 intracellular membrane-boun…	GO:0000166 nucleotide binding; GO:0003824 catalytic activity; GO:0005488 binding; GO:0009055 electron transfer activity; GO:0016491 oxidoreductase activity; GO:0036094 small molecule binding; GO:0043167 ion binding; GO:0043168 anion binding; GO:0048037 cofactor binding; GO:0050660 flavin adenine dinucleotide binding; GO:0050662 coenzyme binding; GO:0097159 organic cyclic compound binding; GO:1901…	PF01012; PF00766	Electron transfer flavoprotein domain; Electron transfer flavoprotein FAD-binding domain	C	KOG3954	Electron transfer flavoprotein, alpha subunit
A0A287A4Z2	122	K	12.103	0.00052399	Up	Superoxide dismutase OS=Sus scrofa OX=9823 GN=SOD2 PE=1 SV=2	SOD2	1	0.000532854	141.39	2	GELLEAIK(1)R	-0.11682	1.32529	1.94315	2.27366	0.213671	0.120471	0.123755	mitochondria	K04564	SOD2; superoxide dismutase, Fe-Mn family [EC:1.15.1.1]	map04013 MAPK signaling pathway - fly; map04068 FoxO signaling pathway; map04146 Peroxisome; map04211 Longevity regulating pathway; map04212 Longevity regulating pathway - worm; map04213 Longevity regulating pathway - multiple species; map05016 Huntington disease	GO:0000302 response to reactive oxygen species; GO:0000303 response to superoxide; GO:0000305 response to oxygen radical; GO:0001101 response to acid chemical; GO:0001306 age-dependent response to oxidative stress; GO:0001315 age-dependent response to reactive oxygen species; GO:0001505 regulation of neurotransmitter levels; GO:0001666 response to hypoxia; GO:0001836 release of cytochrome c from …	GO:0005622 intracellular; GO:0005623 cell; GO:0005737 cytoplasm; GO:0005739 mitochondrion; GO:0005759 mitochondrial matrix; GO:0009295 nucleoid; GO:0031974 membrane-enclosed lumen; GO:0042645 mitochondrial nucleoid; GO:0043209 myelin sheath; GO:0043226 organelle; GO:0043227 membrane-bounded organelle; GO:0043228 non-membrane-bounded organelle; GO:0043229 intracellular organelle; GO:0043231 intrac…	GO:0003676 nucleic acid binding; GO:0003677 DNA binding; GO:0003824 catalytic activity; GO:0004784 superoxide dismutase activity; GO:0005488 binding; GO:0005515 protein binding; GO:0008144 drug binding; GO:0016209 antioxidant activity; GO:0016491 oxidoreductase activity; GO:0016721 oxidoreductase activity, acting on superoxide radicals as acceptor; GO:0019825 oxygen binding; GO:0019899 enzyme bin…	PF00081; PF02777	Iron/manganese superoxide dismutases, alpha-hairpin domain; Iron/manganese superoxide dismutases, C-terminal domain	P	KOG0876	Manganese superoxide dismutase
A0A287A4Z2	68	K	5.991	0.0229553	Up	Superoxide dismutase OS=Sus scrofa OX=9823 GN=SOD2 PE=1 SV=2	SOD2	1	1.16914e-19	193.27	3	HHAAYVNNLNVVEEK(1)YQEALK(1)K	-0.17281	1.24042	1.30213	2.59918	0.0936406	0.284549	0.480087	mitochondria	K04564	SOD2; superoxide dismutase, Fe-Mn family [EC:1.15.1.1]	map04013 MAPK signaling pathway - fly; map04068 FoxO signaling pathway; map04146 Peroxisome; map04211 Longevity regulating pathway; map04212 Longevity regulating pathway - worm; map04213 Longevity regulating pathway - multiple species; map05016 Huntington disease	GO:0000302 response to reactive oxygen species; GO:0000303 response to superoxide; GO:0000305 response to oxygen radical; GO:0001101 response to acid chemical; GO:0001306 age-dependent response to oxidative stress; GO:0001315 age-dependent response to reactive oxygen species; GO:0001505 regulation of neurotransmitter levels; GO:0001666 response to hypoxia; GO:0001836 release of cytochrome c from …	GO:0005622 intracellular; GO:0005623 cell; GO:0005737 cytoplasm; GO:0005739 mitochondrion; GO:0005759 mitochondrial matrix; GO:0009295 nucleoid; GO:0031974 membrane-enclosed lumen; GO:0042645 mitochondrial nucleoid; GO:0043209 myelin sheath; GO:0043226 organelle; GO:0043227 membrane-bounded organelle; GO:0043228 non-membrane-bounded organelle; GO:0043229 intracellular organelle; GO:0043231 intrac…	GO:0003676 nucleic acid binding; GO:0003677 DNA binding; GO:0003824 catalytic activity; GO:0004784 superoxide dismutase activity; GO:0005488 binding; GO:0005515 protein binding; GO:0008144 drug binding; GO:0016209 antioxidant activity; GO:0016491 oxidoreductase activity; GO:0016721 oxidoreductase activity, acting on superoxide radicals as acceptor; GO:0019825 oxygen binding; GO:0019899 enzyme bin…	PF00081; PF02777	Iron/manganese superoxide dismutases, alpha-hairpin domain; Iron/manganese superoxide dismutases, C-terminal domain	P	KOG0876	Manganese superoxide dismutase
A0A287A4Z2	74	K	12.163	8.03885e-05	Up	Superoxide dismutase OS=Sus scrofa OX=9823 GN=SOD2 PE=1 SV=2	SOD2	1	1.16914e-19	193.27	2	YQEALK(1)K	-0.51462	1.71226	1.63501	2.19689	0.118425	0.178052	0.159358	mitochondria	K04564	SOD2; superoxide dismutase, Fe-Mn family [EC:1.15.1.1]	map04013 MAPK signaling pathway - fly; map04068 FoxO signaling pathway; map04146 Peroxisome; map04211 Longevity regulating pathway; map04212 Longevity regulating pathway - worm; map04213 Longevity regulating pathway - multiple species; map05016 Huntington disease	GO:0000302 response to reactive oxygen species; GO:0000303 response to superoxide; GO:0000305 response to oxygen radical; GO:0001101 response to acid chemical; GO:0001306 age-dependent response to oxidative stress; GO:0001315 age-dependent response to reactive oxygen species; GO:0001505 regulation of neurotransmitter levels; GO:0001666 response to hypoxia; GO:0001836 release of cytochrome c from …	GO:0005622 intracellular; GO:0005623 cell; GO:0005737 cytoplasm; GO:0005739 mitochondrion; GO:0005759 mitochondrial matrix; GO:0009295 nucleoid; GO:0031974 membrane-enclosed lumen; GO:0042645 mitochondrial nucleoid; GO:0043209 myelin sheath; GO:0043226 organelle; GO:0043227 membrane-bounded organelle; GO:0043228 non-membrane-bounded organelle; GO:0043229 intracellular organelle; GO:0043231 intrac…	GO:0003676 nucleic acid binding; GO:0003677 DNA binding; GO:0003824 catalytic activity; GO:0004784 superoxide dismutase activity; GO:0005488 binding; GO:0005515 protein binding; GO:0008144 drug binding; GO:0016209 antioxidant activity; GO:0016491 oxidoreductase activity; GO:0016721 oxidoreductase activity, acting on superoxide radicals as acceptor; GO:0019825 oxygen binding; GO:0019899 enzyme bin…	PF00081; PF02777	Iron/manganese superoxide dismutases, alpha-hairpin domain; Iron/manganese superoxide dismutases, C-terminal domain	P	KOG0876	Manganese superoxide dismutase
F1SKM0	225	K	8.668	0.000441534	Up	Ubiquinol-cytochrome c reductase core protein 1 OS=Sus scrofa OX=9823 GN=UQCRC1 PE=1 SV=3	UQCRC1	1	5.6637e-80	361.65	2	ADLTEYVSQHYK(1)APR	-0.23748	1.28386	2.30089	1.79467	0.253063	0.191409	0.176107	mitochondria	K00414	QCR1, UQCRC1; ubiquinol-cytochrome c reductase core subunit 1	map00190 Oxidative phosphorylation; map01100 Metabolic pathways; map04260 Cardiac muscle contraction; map04714 Thermogenesis; map04932 Non-alcoholic fatty liver disease (NAFLD); map05010 Alzheimer disease; map05012 Parkinson disease; map05016 Huntington disease	GO:0006091 generation of precursor metabolites and energy; GO:0006119 oxidative phosphorylation; GO:0006122 mitochondrial electron transport, ubiquinol to cytochrome c; GO:0006139 nucleobase-containing compound metabolic process; GO:0006163 purine nucleotide metabolic process; GO:0006508 proteolysis; GO:0006725 cellular aromatic compound metabolic process; GO:0006753 nucleoside phosphate metaboli…	GO:0005622 intracellular; GO:0005623 cell; GO:0005737 cytoplasm; GO:0005739 mitochondrion; GO:0005740 mitochondrial envelope; GO:0005743 mitochondrial inner membrane; GO:0005746 mitochondrial respirasome; GO:0005750 mitochondrial respiratory chain complex III; GO:0005829 cytosol; GO:0016020 membrane; GO:0019866 organelle inner membrane; GO:0031090 organelle membrane; GO:0031966 mitochondrial memb…	GO:0003824 catalytic activity; GO:0004175 endopeptidase activity; GO:0004222 metalloendopeptidase activity; GO:0005488 binding; GO:0005515 protein binding; GO:0008121 ubiquinol-cytochrome-c reductase activity; GO:0008233 peptidase activity; GO:0008237 metallopeptidase activity; GO:0008270 zinc ion binding; GO:0009055 electron transfer activity; GO:0016491 oxidoreductase activity; GO:0016679 oxido…	PF05193	Peptidase M16 inactive domain	C	KOG0960	Mitochondrial processing peptidase, beta subunit, and related enzymes (insulinase superfamily)
F1SKM0	85	K	14.469	6.61846e-06	Up	Ubiquinol-cytochrome c reductase core protein 1 OS=Sus scrofa OX=9823 GN=UQCRC1 PE=1 SV=3	UQCRC1	1	9.89178e-26	261.99	3	YENEK(1)NNGAGYFVEHLAFK	1.9817	1.7541	2.10574	1.75229	0.143507	0.115938	0.128437	mitochondria	K00414	QCR1, UQCRC1; ubiquinol-cytochrome c reductase core subunit 1	map00190 Oxidative phosphorylation; map01100 Metabolic pathways; map04260 Cardiac muscle contraction; map04714 Thermogenesis; map04932 Non-alcoholic fatty liver disease (NAFLD); map05010 Alzheimer disease; map05012 Parkinson disease; map05016 Huntington disease	GO:0006091 generation of precursor metabolites and energy; GO:0006119 oxidative phosphorylation; GO:0006122 mitochondrial electron transport, ubiquinol to cytochrome c; GO:0006139 nucleobase-containing compound metabolic process; GO:0006163 purine nucleotide metabolic process; GO:0006508 proteolysis; GO:0006725 cellular aromatic compound metabolic process; GO:0006753 nucleoside phosphate metaboli…	GO:0005622 intracellular; GO:0005623 cell; GO:0005737 cytoplasm; GO:0005739 mitochondrion; GO:0005740 mitochondrial envelope; GO:0005743 mitochondrial inner membrane; GO:0005746 mitochondrial respirasome; GO:0005750 mitochondrial respiratory chain complex III; GO:0005829 cytosol; GO:0016020 membrane; GO:0019866 organelle inner membrane; GO:0031090 organelle membrane; GO:0031966 mitochondrial memb…	GO:0003824 catalytic activity; GO:0004175 endopeptidase activity; GO:0004222 metalloendopeptidase activity; GO:0005488 binding; GO:0005515 protein binding; GO:0008121 ubiquinol-cytochrome-c reductase activity; GO:0008233 peptidase activity; GO:0008237 metallopeptidase activity; GO:0008270 zinc ion binding; GO:0009055 electron transfer activity; GO:0016491 oxidoreductase activity; GO:0016679 oxido…	PF05193	Peptidase M16 inactive domain	C	KOG0960	Mitochondrial processing peptidase, beta subunit, and related enzymes (insulinase superfamily)
Q6QAQ1	61	K	0.334	0.00147771	Down	Actin, cytoplasmic 1 OS=Sus scrofa OX=9823 GN=ACTB PE=1 SV=2	ACTB	1	2.94344e-06	217.66	2	DSYVGDEAQSK(1)R	-0.8044	0.63005	0.465125	0.406371	1.42068	1.39384	1.68394	cytoskeleton	K05692	ACTB_G1; actin beta/gamma 1	map04015 Rap1 signaling pathway; map04145 Phagosome; map04210 Apoptosis; map04390 Hippo signaling pathway; map04391 Hippo signaling pathway - fly; map04510 Focal adhesion; map04520 Adherens junction; map04530 Tight junction; map04611 Platelet activation; map04670 Leukocyte transendothelial migration; map04714 Thermogenesis; map04745 Phototransduction - fly; map04810 Regulation of actin cytoskelet…	GO:0000079 regulation of cyclin-dependent protein serine/threonine kinase activity; GO:0000902 cell morphogenesis; GO:0000904 cell morphogenesis involved in differentiation; GO:0001654 eye development; GO:0001932 regulation of protein phosphorylation; GO:0001933 negative regulation of protein phosphorylation; GO:0002252 immune effector process; GO:0002253 activation of immune response; GO:0002376…	GO:0000123 histone acetyltransferase complex; GO:0001725 stress fiber; GO:0002102 podosome; GO:0005622 intracellular; GO:0005623 cell; GO:0005634 nucleus; GO:0005654 nucleoplasm; GO:0005737 cytoplasm; GO:0005829 cytosol; GO:0005856 cytoskeleton; GO:0005886 plasma membrane; GO:0005912 adherens junction; GO:0005925 focal adhesion; GO:0005938 cell cortex; GO:0014069 postsynaptic density; GO:0015629 …	GO:0005198 structural molecule activity; GO:0005200 structural constituent of cytoskeleton; GO:0005488 binding; GO:0005515 protein binding; GO:0008092 cytoskeletal protein binding; GO:0008134 transcription factor binding; GO:0019894 kinesin binding; GO:0019899 enzyme binding; GO:0019900 kinase binding; GO:0019901 protein kinase binding; GO:0030957 Tat protein binding; GO:0042802 identical protein…			Z	KOG0676	Actin and related proteins
Q6QAQ1	50	K	0.31	0.000948495	Down	Actin, cytoplasmic 1 OS=Sus scrofa OX=9823 GN=ACTB PE=1 SV=2	ACTB	1	1.28338e-17	197.72	3	HQGVMVGMGQK(1)DSYVGDEAQSK	0.1872	0.517584	0.378265	0.522952	1.76518	1.48849	1.32753	cytoskeleton	K05692	ACTB_G1; actin beta/gamma 1	map04015 Rap1 signaling pathway; map04145 Phagosome; map04210 Apoptosis; map04390 Hippo signaling pathway; map04391 Hippo signaling pathway - fly; map04510 Focal adhesion; map04520 Adherens junction; map04530 Tight junction; map04611 Platelet activation; map04670 Leukocyte transendothelial migration; map04714 Thermogenesis; map04745 Phototransduction - fly; map04810 Regulation of actin cytoskelet…	GO:0000079 regulation of cyclin-dependent protein serine/threonine kinase activity; GO:0000902 cell morphogenesis; GO:0000904 cell morphogenesis involved in differentiation; GO:0001654 eye development; GO:0001932 regulation of protein phosphorylation; GO:0001933 negative regulation of protein phosphorylation; GO:0002252 immune effector process; GO:0002253 activation of immune response; GO:0002376…	GO:0000123 histone acetyltransferase complex; GO:0001725 stress fiber; GO:0002102 podosome; GO:0005622 intracellular; GO:0005623 cell; GO:0005634 nucleus; GO:0005654 nucleoplasm; GO:0005737 cytoplasm; GO:0005829 cytosol; GO:0005856 cytoskeleton; GO:0005886 plasma membrane; GO:0005912 adherens junction; GO:0005925 focal adhesion; GO:0005938 cell cortex; GO:0014069 postsynaptic density; GO:0015629 …	GO:0005198 structural molecule activity; GO:0005200 structural constituent of cytoskeleton; GO:0005488 binding; GO:0005515 protein binding; GO:0008092 cytoskeletal protein binding; GO:0008134 transcription factor binding; GO:0019894 kinesin binding; GO:0019899 enzyme binding; GO:0019900 kinase binding; GO:0019901 protein kinase binding; GO:0030957 Tat protein binding; GO:0042802 identical protein…			Z	KOG0676	Actin and related proteins
Q6QAQ1	328	K	0.221	0.000521851	Down	Actin, cytoplasmic 1 OS=Sus scrofa OX=9823 GN=ACTB PE=1 SV=2	ACTB	1	0.001389	133.23	2	IK(1)IIAPPER	-0.37349	0.280495	0.410437	0.395829	1.9299	1.50024	1.48309	cytoskeleton	K05692	ACTB_G1; actin beta/gamma 1	map04015 Rap1 signaling pathway; map04145 Phagosome; map04210 Apoptosis; map04390 Hippo signaling pathway; map04391 Hippo signaling pathway - fly; map04510 Focal adhesion; map04520 Adherens junction; map04530 Tight junction; map04611 Platelet activation; map04670 Leukocyte transendothelial migration; map04714 Thermogenesis; map04745 Phototransduction - fly; map04810 Regulation of actin cytoskelet…	GO:0000079 regulation of cyclin-dependent protein serine/threonine kinase activity; GO:0000902 cell morphogenesis; GO:0000904 cell morphogenesis involved in differentiation; GO:0001654 eye development; GO:0001932 regulation of protein phosphorylation; GO:0001933 negative regulation of protein phosphorylation; GO:0002252 immune effector process; GO:0002253 activation of immune response; GO:0002376…	GO:0000123 histone acetyltransferase complex; GO:0001725 stress fiber; GO:0002102 podosome; GO:0005622 intracellular; GO:0005623 cell; GO:0005634 nucleus; GO:0005654 nucleoplasm; GO:0005737 cytoplasm; GO:0005829 cytosol; GO:0005856 cytoskeleton; GO:0005886 plasma membrane; GO:0005912 adherens junction; GO:0005925 focal adhesion; GO:0005938 cell cortex; GO:0014069 postsynaptic density; GO:0015629 …	GO:0005198 structural molecule activity; GO:0005200 structural constituent of cytoskeleton; GO:0005488 binding; GO:0005515 protein binding; GO:0008092 cytoskeletal protein binding; GO:0008134 transcription factor binding; GO:0019894 kinesin binding; GO:0019899 enzyme binding; GO:0019900 kinase binding; GO:0019901 protein kinase binding; GO:0030957 Tat protein binding; GO:0042802 identical protein…			Z	KOG0676	Actin and related proteins
Q6QAQ1	113	K	0.107	5.41803e-05	Down	Actin, cytoplasmic 1 OS=Sus scrofa OX=9823 GN=ACTB PE=1 SV=2	ACTB	1	6.71563e-08	148.52	3	VAPEEHPVLLTEAPLNPK(1)ANR	-0.14068	0.189585	0.226696	0.16274	1.88037	1.54348	1.99713	cytoskeleton	K05692	ACTB_G1; actin beta/gamma 1	map04015 Rap1 signaling pathway; map04145 Phagosome; map04210 Apoptosis; map04390 Hippo signaling pathway; map04391 Hippo signaling pathway - fly; map04510 Focal adhesion; map04520 Adherens junction; map04530 Tight junction; map04611 Platelet activation; map04670 Leukocyte transendothelial migration; map04714 Thermogenesis; map04745 Phototransduction - fly; map04810 Regulation of actin cytoskelet…	GO:0000079 regulation of cyclin-dependent protein serine/threonine kinase activity; GO:0000902 cell morphogenesis; GO:0000904 cell morphogenesis involved in differentiation; GO:0001654 eye development; GO:0001932 regulation of protein phosphorylation; GO:0001933 negative regulation of protein phosphorylation; GO:0002252 immune effector process; GO:0002253 activation of immune response; GO:0002376…	GO:0000123 histone acetyltransferase complex; GO:0001725 stress fiber; GO:0002102 podosome; GO:0005622 intracellular; GO:0005623 cell; GO:0005634 nucleus; GO:0005654 nucleoplasm; GO:0005737 cytoplasm; GO:0005829 cytosol; GO:0005856 cytoskeleton; GO:0005886 plasma membrane; GO:0005912 adherens junction; GO:0005925 focal adhesion; GO:0005938 cell cortex; GO:0014069 postsynaptic density; GO:0015629 …	GO:0005198 structural molecule activity; GO:0005200 structural constituent of cytoskeleton; GO:0005488 binding; GO:0005515 protein binding; GO:0008092 cytoskeletal protein binding; GO:0008134 transcription factor binding; GO:0019894 kinesin binding; GO:0019899 enzyme binding; GO:0019900 kinase binding; GO:0019901 protein kinase binding; GO:0030957 Tat protein binding; GO:0042802 identical protein…			Z	KOG0676	Actin and related proteins
A0A287ART6	884	K	0.184	0.00319124	Down	RNA binding motif protein 6 OS=Sus scrofa OX=9823 GN=RBM6 PE=4 SV=2	RBM6	1	0.00856543	98.898	2	GNDRREK(1)LQSFDSPER	0.83295	0.433503	0.386248	0.263526	1.87739	2.03933		nucleus				GO:0006139 nucleobase-containing compound metabolic process; GO:0006396 RNA processing; GO:0006725 cellular aromatic compound metabolic process; GO:0006807 nitrogen compound metabolic process; GO:0008152 metabolic process; GO:0009987 cellular process; GO:0010467 gene expression; GO:0016070 RNA metabolic process; GO:0034641 cellular nitrogen compound metabolic process; GO:0043170 macromolecule met…	GO:0005622 intracellular; GO:0005623 cell; GO:0005634 nucleus; GO:0043226 organelle; GO:0043227 membrane-bounded organelle; GO:0043229 intracellular organelle; GO:0043231 intracellular membrane-bounded organelle;	GO:0003676 nucleic acid binding; GO:0003677 DNA binding; GO:0005488 binding; GO:0097159 organic cyclic compound binding; GO:1901363 heterocyclic compound binding;			S	KOG0154	RNA-binding protein RBM5 and related proteins, contain G-patch and RRM domains
A0A287A5U1	1103	K	0.126	0.00776123	Down	E3 ubiquitin-protein ligase RBBP6 isoform 2 OS=Sus scrofa OX=9823 GN=RBBP6 PE=4 SV=1	RBBP6	1	0.0197879	116.25	2	SK(1)PLDSK	0.36632	0.264587	0.182714			1.77208	1.78062	nucleus	K10624	RBBP6; E3 ubiquitin-protein ligase RBBP6 [EC:2.3.2.27]					PF08783; PF13696; PF04564	DWNN domain; Zinc knuckle; U-box domain	O	KOG0314	Predicted E3 ubiquitin ligase
A0A287A5Y1	15	K	6.37	0.00706193	Up	Haloacid dehalogenase-like hydrolase domain-containing protein 3 OS=Sus scrofa OX=9823 GN=HDHD3 PE=1 SV=1	HDHD3	1	1.04647e-08	231.38	2	LLTWDVK(1)DTLLR	-0.04863	1.2379	2.13599	1.15244	0.272651		0.20103	mitochondria									S	KOG3085	Predicted hydrolase (HAD superfamily)
Q2EHH7	238	K	9.339	0.0185176	Up	Serine/threonine-protein phosphatase OS=Sus scrofa OX=9823 GN=PPP1CC PE=1 SV=1	PPP1CC	1	6.64718e-05	196.88	3	FLHK(1)HDLDLICR	-0.14117	0.891869	1.03367	3.49411	0.347697	0.123593	0.109064	cytoplasm	K06269	PPP1C; serine/threonine-protein phosphatase PP1 catalytic subunit [EC:3.1.3.16]	map03015 mRNA surveillance pathway; map04022 cGMP-PKG signaling pathway; map04024 cAMP signaling pathway; map04114 Oocyte meiosis; map04218 Cellular senescence; map04261 Adrenergic signaling in cardiomyocytes; map04270 Vascular smooth muscle contraction; map04390 Hippo signaling pathway; map04510 Focal adhesion; map04611 Platelet activation; map04720 Long-term potentiation; map04728 Dopaminergic …	GO:0006464 cellular protein modification process; GO:0006470 protein dephosphorylation; GO:0006793 phosphorus metabolic process; GO:0006796 phosphate-containing compound metabolic process; GO:0006807 nitrogen compound metabolic process; GO:0007275 multicellular organism development; GO:0007399 nervous system development; GO:0007623 circadian rhythm; GO:0008152 metabolic process; GO:0008284 positi…	GO:0005622 intracellular; GO:0005623 cell; GO:0005737 cytoplasm; GO:0005739 mitochondrion; GO:0005740 mitochondrial envelope; GO:0005741 mitochondrial outer membrane; GO:0008287 protein serine/threonine phosphatase complex; GO:0016020 membrane; GO:0019867 outer membrane; GO:0030425 dendrite; GO:0031090 organelle membrane; GO:0031966 mitochondrial membrane; GO:0031967 organelle envelope; GO:003196…	GO:0003824 catalytic activity; GO:0004721 phosphoprotein phosphatase activity; GO:0004722 protein serine/threonine phosphatase activity; GO:0005488 binding; GO:0005515 protein binding; GO:0005521 lamin binding; GO:0008022 protein C-terminus binding; GO:0008157 protein phosphatase 1 binding; GO:0016787 hydrolase activity; GO:0016788 hydrolase activity, acting on ester bonds; GO:0016791 phosphatase…	PF00149	Calcineurin-like phosphoesterase	B	KOG0374	Serine/threonine specific protein phosphatase PP1, catalytic subunit
Q2EHH7	26	K	6.91	0.0162667	Up	Serine/threonine-protein phosphatase OS=Sus scrofa OX=9823 GN=PPP1CC PE=1 SV=1	PPP1CC	1	4.80925e-14	254.19	3	PGK(1)NVQLQENEIR	-0.782	1.57031	0.839396	2.83178	0.434978	0.174473	0.149053	cytoplasm	K06269	PPP1C; serine/threonine-protein phosphatase PP1 catalytic subunit [EC:3.1.3.16]	map03015 mRNA surveillance pathway; map04022 cGMP-PKG signaling pathway; map04024 cAMP signaling pathway; map04114 Oocyte meiosis; map04218 Cellular senescence; map04261 Adrenergic signaling in cardiomyocytes; map04270 Vascular smooth muscle contraction; map04390 Hippo signaling pathway; map04510 Focal adhesion; map04611 Platelet activation; map04720 Long-term potentiation; map04728 Dopaminergic …	GO:0006464 cellular protein modification process; GO:0006470 protein dephosphorylation; GO:0006793 phosphorus metabolic process; GO:0006796 phosphate-containing compound metabolic process; GO:0006807 nitrogen compound metabolic process; GO:0007275 multicellular organism development; GO:0007399 nervous system development; GO:0007623 circadian rhythm; GO:0008152 metabolic process; GO:0008284 positi…	GO:0005622 intracellular; GO:0005623 cell; GO:0005737 cytoplasm; GO:0005739 mitochondrion; GO:0005740 mitochondrial envelope; GO:0005741 mitochondrial outer membrane; GO:0008287 protein serine/threonine phosphatase complex; GO:0016020 membrane; GO:0019867 outer membrane; GO:0030425 dendrite; GO:0031090 organelle membrane; GO:0031966 mitochondrial membrane; GO:0031967 organelle envelope; GO:003196…	GO:0003824 catalytic activity; GO:0004721 phosphoprotein phosphatase activity; GO:0004722 protein serine/threonine phosphatase activity; GO:0005488 binding; GO:0005515 protein binding; GO:0005521 lamin binding; GO:0008022 protein C-terminus binding; GO:0008157 protein phosphatase 1 binding; GO:0016787 hydrolase activity; GO:0016788 hydrolase activity, acting on ester bonds; GO:0016791 phosphatase…	PF00149	Calcineurin-like phosphoesterase	B	KOG0374	Serine/threonine specific protein phosphatase PP1, catalytic subunit
Q2EHH7	141	K	5.645	0.022184	Up	Serine/threonine-protein phosphatase OS=Sus scrofa OX=9823 GN=PPP1CC PE=1 SV=1	PPP1CC	1	7.19437e-09	234.35	3	IYGFYDECK(1)R	-1.433	1.18994	1.28272	1.99926	0.382265	0.145819		cytoplasm	K06269	PPP1C; serine/threonine-protein phosphatase PP1 catalytic subunit [EC:3.1.3.16]	map03015 mRNA surveillance pathway; map04022 cGMP-PKG signaling pathway; map04024 cAMP signaling pathway; map04114 Oocyte meiosis; map04218 Cellular senescence; map04261 Adrenergic signaling in cardiomyocytes; map04270 Vascular smooth muscle contraction; map04390 Hippo signaling pathway; map04510 Focal adhesion; map04611 Platelet activation; map04720 Long-term potentiation; map04728 Dopaminergic …	GO:0006464 cellular protein modification process; GO:0006470 protein dephosphorylation; GO:0006793 phosphorus metabolic process; GO:0006796 phosphate-containing compound metabolic process; GO:0006807 nitrogen compound metabolic process; GO:0007275 multicellular organism development; GO:0007399 nervous system development; GO:0007623 circadian rhythm; GO:0008152 metabolic process; GO:0008284 positi…	GO:0005622 intracellular; GO:0005623 cell; GO:0005737 cytoplasm; GO:0005739 mitochondrion; GO:0005740 mitochondrial envelope; GO:0005741 mitochondrial outer membrane; GO:0008287 protein serine/threonine phosphatase complex; GO:0016020 membrane; GO:0019867 outer membrane; GO:0030425 dendrite; GO:0031090 organelle membrane; GO:0031966 mitochondrial membrane; GO:0031967 organelle envelope; GO:003196…	GO:0003824 catalytic activity; GO:0004721 phosphoprotein phosphatase activity; GO:0004722 protein serine/threonine phosphatase activity; GO:0005488 binding; GO:0005515 protein binding; GO:0005521 lamin binding; GO:0008022 protein C-terminus binding; GO:0008157 protein phosphatase 1 binding; GO:0016787 hydrolase activity; GO:0016788 hydrolase activity, acting on ester bonds; GO:0016791 phosphatase…	PF00149	Calcineurin-like phosphoesterase	B	KOG0374	Serine/threonine specific protein phosphatase PP1, catalytic subunit
Q2EHH7	150	K	8.099	0.00625551	Up	Serine/threonine-protein phosphatase OS=Sus scrofa OX=9823 GN=PPP1CC PE=1 SV=1	PPP1CC	1	3.29416e-31	272.16	2	LWK(1)TFTDCFNCLPIAAIVDEK	0.12357	1.12928	1.88026	2.33103	0.329852	0.228552	0.101024	cytoplasm	K06269	PPP1C; serine/threonine-protein phosphatase PP1 catalytic subunit [EC:3.1.3.16]	map03015 mRNA surveillance pathway; map04022 cGMP-PKG signaling pathway; map04024 cAMP signaling pathway; map04114 Oocyte meiosis; map04218 Cellular senescence; map04261 Adrenergic signaling in cardiomyocytes; map04270 Vascular smooth muscle contraction; map04390 Hippo signaling pathway; map04510 Focal adhesion; map04611 Platelet activation; map04720 Long-term potentiation; map04728 Dopaminergic …	GO:0006464 cellular protein modification process; GO:0006470 protein dephosphorylation; GO:0006793 phosphorus metabolic process; GO:0006796 phosphate-containing compound metabolic process; GO:0006807 nitrogen compound metabolic process; GO:0007275 multicellular organism development; GO:0007399 nervous system development; GO:0007623 circadian rhythm; GO:0008152 metabolic process; GO:0008284 positi…	GO:0005622 intracellular; GO:0005623 cell; GO:0005737 cytoplasm; GO:0005739 mitochondrion; GO:0005740 mitochondrial envelope; GO:0005741 mitochondrial outer membrane; GO:0008287 protein serine/threonine phosphatase complex; GO:0016020 membrane; GO:0019867 outer membrane; GO:0030425 dendrite; GO:0031090 organelle membrane; GO:0031966 mitochondrial membrane; GO:0031967 organelle envelope; GO:003196…	GO:0003824 catalytic activity; GO:0004721 phosphoprotein phosphatase activity; GO:0004722 protein serine/threonine phosphatase activity; GO:0005488 binding; GO:0005515 protein binding; GO:0005521 lamin binding; GO:0008022 protein C-terminus binding; GO:0008157 protein phosphatase 1 binding; GO:0016787 hydrolase activity; GO:0016788 hydrolase activity, acting on ester bonds; GO:0016791 phosphatase…	PF00149	Calcineurin-like phosphoesterase	B	KOG0374	Serine/threonine specific protein phosphatase PP1, catalytic subunit
Q2EHH7	147	K	4.224	0.00659646	Up	Serine/threonine-protein phosphatase OS=Sus scrofa OX=9823 GN=PPP1CC PE=1 SV=1	PPP1CC	1	0.0241688	109.63	2	YNIK(1)LWK	-0.35071	1.35882	1.40799	2.08458	0.591342	0.290998	0.266277	cytoplasm	K06269	PPP1C; serine/threonine-protein phosphatase PP1 catalytic subunit [EC:3.1.3.16]	map03015 mRNA surveillance pathway; map04022 cGMP-PKG signaling pathway; map04024 cAMP signaling pathway; map04114 Oocyte meiosis; map04218 Cellular senescence; map04261 Adrenergic signaling in cardiomyocytes; map04270 Vascular smooth muscle contraction; map04390 Hippo signaling pathway; map04510 Focal adhesion; map04611 Platelet activation; map04720 Long-term potentiation; map04728 Dopaminergic …	GO:0006464 cellular protein modification process; GO:0006470 protein dephosphorylation; GO:0006793 phosphorus metabolic process; GO:0006796 phosphate-containing compound metabolic process; GO:0006807 nitrogen compound metabolic process; GO:0007275 multicellular organism development; GO:0007399 nervous system development; GO:0007623 circadian rhythm; GO:0008152 metabolic process; GO:0008284 positi…	GO:0005622 intracellular; GO:0005623 cell; GO:0005737 cytoplasm; GO:0005739 mitochondrion; GO:0005740 mitochondrial envelope; GO:0005741 mitochondrial outer membrane; GO:0008287 protein serine/threonine phosphatase complex; GO:0016020 membrane; GO:0019867 outer membrane; GO:0030425 dendrite; GO:0031090 organelle membrane; GO:0031966 mitochondrial membrane; GO:0031967 organelle envelope; GO:003196…	GO:0003824 catalytic activity; GO:0004721 phosphoprotein phosphatase activity; GO:0004722 protein serine/threonine phosphatase activity; GO:0005488 binding; GO:0005515 protein binding; GO:0005521 lamin binding; GO:0008022 protein C-terminus binding; GO:0008157 protein phosphatase 1 binding; GO:0016787 hydrolase activity; GO:0016788 hydrolase activity, acting on ester bonds; GO:0016791 phosphatase…	PF00149	Calcineurin-like phosphoesterase	B	KOG0374	Serine/threonine specific protein phosphatase PP1, catalytic subunit
A0A287A6R7	86	K	0.258	0.0124158	Down	Actin alpha cardiac muscle 1 OS=Sus scrofa OX=9823 GN=ACTC1 PE=3 SV=1	ACTC1	1	7.80735e-41	243.87	5	YPIEHGIITNWDDMEK(1)IWHHTFYNELR	-0.012111	0.357639		0.376104	1.18022	1.99179	1.09425	cytoskeleton	K12314	ACTC1; actin, alpha cardiac muscle	map04260 Cardiac muscle contraction; map04261 Adrenergic signaling in cardiomyocytes; map05410 Hypertrophic cardiomyopathy (HCM); map05414 Dilated cardiomyopathy (DCM)	GO:0003007 heart morphogenesis; GO:0003008 system process; GO:0003012 muscle system process; GO:0003013 circulatory system process; GO:0003015 heart process; GO:0006928 movement of cell or subcellular component; GO:0006936 muscle contraction; GO:0006941 striated muscle contraction; GO:0006996 organelle organization; GO:0007010 cytoskeleton organization; GO:0007015 actin filament organization; GO:…	GO:0001725 stress fiber; GO:0005622 intracellular; GO:0005623 cell; GO:0005737 cytoplasm; GO:0005829 cytosol; GO:0005856 cytoskeleton; GO:0005865 striated muscle thin filament; GO:0005884 actin filament; GO:0015629 actin cytoskeleton; GO:0030016 myofibril; GO:0030017 sarcomere; GO:0030027 lamellipodium; GO:0030175 filopodium; GO:0031252 cell leading edge; GO:0031674 I band; GO:0031941 filamentous…	GO:0000166 nucleotide binding; GO:0000287 magnesium ion binding; GO:0003779 actin binding; GO:0003785 actin monomer binding; GO:0003824 catalytic activity; GO:0005488 binding; GO:0005509 calcium ion binding; GO:0005515 protein binding; GO:0005523 tropomyosin binding; GO:0005524 ATP binding; GO:0008092 cytoskeletal protein binding; GO:0008144 drug binding; GO:0016462 pyrophosphatase activity; GO:0…			Z	KOG0676	Actin and related proteins
F1SRQ7	103	K	7.898	0.000643875	Up	Single-stranded DNA-binding protein, mitochondrial OS=Sus scrofa OX=9823 GN=SSBP1 PE=1 SV=2	SSBP1	1	0.0155459	85.064	2	DVAYQYVK(1)K	0.50038	1.67128	1.73991	1.9145	0.290962	0.142089	0.241258	nucleus	K03111	ssb; single-strand DNA-binding protein	map03030 DNA replication; map03430 Mismatch repair; map03440 Homologous recombination	GO:0006996 organelle organization; GO:0007005 mitochondrion organization; GO:0009653 anatomical structure morphogenesis; GO:0009987 cellular process; GO:0016043 cellular component organization; GO:0032502 developmental process; GO:0032989 cellular component morphogenesis; GO:0032990 cell part morphogenesis; GO:0043085 positive regulation of catalytic activity; GO:0044093 positive regulation of mo…	GO:0005622 intracellular; GO:0005623 cell; GO:0005737 cytoplasm; GO:0005739 mitochondrion; GO:0005759 mitochondrial matrix; GO:0009295 nucleoid; GO:0031974 membrane-enclosed lumen; GO:0042645 mitochondrial nucleoid; GO:0043226 organelle; GO:0043227 membrane-bounded organelle; GO:0043228 non-membrane-bounded organelle; GO:0043229 intracellular organelle; GO:0043231 intracellular membrane-bounded o…	GO:0003676 nucleic acid binding; GO:0003677 DNA binding; GO:0003682 chromatin binding; GO:0003697 single-stranded DNA binding; GO:0005488 binding; GO:0097159 organic cyclic compound binding; GO:1901363 heterocyclic compound binding;	PF00436	Single-strand binding protein family	L	KOG1653	Single-stranded DNA-binding protein
F1SRQ7	113	K	13.091	0.00159542	Up	Single-stranded DNA-binding protein, mitochondrial OS=Sus scrofa OX=9823 GN=SSBP1 PE=1 SV=2	SSBP1	1	1.72946e-33	279.86	2	VYVEGK(1)VDYGEYTDKNNVR	-0.25697	1.61761	1.63208	2.32451	0.22602	0.127365	0.0724184	nucleus	K03111	ssb; single-strand DNA-binding protein	map03030 DNA replication; map03430 Mismatch repair; map03440 Homologous recombination	GO:0006996 organelle organization; GO:0007005 mitochondrion organization; GO:0009653 anatomical structure morphogenesis; GO:0009987 cellular process; GO:0016043 cellular component organization; GO:0032502 developmental process; GO:0032989 cellular component morphogenesis; GO:0032990 cell part morphogenesis; GO:0043085 positive regulation of catalytic activity; GO:0044093 positive regulation of mo…	GO:0005622 intracellular; GO:0005623 cell; GO:0005737 cytoplasm; GO:0005739 mitochondrion; GO:0005759 mitochondrial matrix; GO:0009295 nucleoid; GO:0031974 membrane-enclosed lumen; GO:0042645 mitochondrial nucleoid; GO:0043226 organelle; GO:0043227 membrane-bounded organelle; GO:0043228 non-membrane-bounded organelle; GO:0043229 intracellular organelle; GO:0043231 intracellular membrane-bounded o…	GO:0003676 nucleic acid binding; GO:0003677 DNA binding; GO:0003682 chromatin binding; GO:0003697 single-stranded DNA binding; GO:0005488 binding; GO:0097159 organic cyclic compound binding; GO:1901363 heterocyclic compound binding;	PF00436	Single-strand binding protein family	L	KOG1653	Single-stranded DNA-binding protein
A0A5G2QK91	30	K	12.153	0.000286857	Up	ATP synthase subunit OS=Sus scrofa OX=9823 GN=ATP5MG PE=1 SV=1	ATP5MG	1	1.84407e-10	130.51	4	LATFWHYAK(1)VELVPPTPAEIPTAIQSLK	0.34295	1.59495	1.72394	2.22495	0.192848	0.160486	0.10283	cytoplasm	K02140	ATPeFG, ATP5L, ATP20; F-type H+-transporting ATPase subunit g	map00190 Oxidative phosphorylation; map01100 Metabolic pathways; map04714 Thermogenesis	GO:0006091 generation of precursor metabolites and energy; GO:0006119 oxidative phosphorylation; GO:0006139 nucleobase-containing compound metabolic process; GO:0006163 purine nucleotide metabolic process; GO:0006164 purine nucleotide biosynthetic process; GO:0006725 cellular aromatic compound metabolic process; GO:0006753 nucleoside phosphate metabolic process; GO:0006754 ATP biosynthetic proces…	GO:0000276 mitochondrial proton-transporting ATP synthase complex, coupling factor F(o); GO:0005622 intracellular; GO:0005623 cell; GO:0005737 cytoplasm; GO:0005739 mitochondrion; GO:0005740 mitochondrial envelope; GO:0005743 mitochondrial inner membrane; GO:0005753 mitochondrial proton-transporting ATP synthase complex; GO:0016020 membrane; GO:0016469 proton-transporting two-sector ATPase comple…	GO:0005215 transporter activity; GO:0022857 transmembrane transporter activity;			C	KOG4103	Mitochondrial F1F0-ATP synthase, subunit g/ATP20
I3LAJ9	151	K	2.556	0.019653	Up	Histone H2B OS=Sus scrofa OX=9823 PE=3 SV=2	--	1	3.48601e-07	153.09	2	LLLPGELAK(1)HAVSEGTK	-0.085375	1.19734	1.21048	1.5578	0.63848	0.395909		nucleus	K11252	H2B; histone H2B	map05034 Alcoholism; map05203 Viral carcinogenesis; map05322 Systemic lupus erythematosus	GO:0006323 DNA packaging; GO:0006325 chromatin organization; GO:0006333 chromatin assembly or disassembly; GO:0006334 nucleosome assembly; GO:0006996 organelle organization; GO:0009987 cellular process; GO:0016043 cellular component organization; GO:0022607 cellular component assembly; GO:0031497 chromatin assembly; GO:0034622 cellular protein-containing complex assembly; GO:0034728 nucleosome or…	GO:0005622 intracellular; GO:0005623 cell; GO:0005634 nucleus; GO:0005654 nucleoplasm; GO:0005694 chromosome; GO:0031974 membrane-enclosed lumen; GO:0031981 nuclear lumen; GO:0043226 organelle; GO:0043227 membrane-bounded organelle; GO:0043228 non-membrane-bounded organelle; GO:0043229 intracellular organelle; GO:0043231 intracellular membrane-bounded organelle; GO:0043232 intracellular non-membr…	GO:0003676 nucleic acid binding; GO:0003677 DNA binding; GO:0005488 binding; GO:0097159 organic cyclic compound binding; GO:1901363 heterocyclic compound binding;	PF00125	Core histone H2A/H2B/H3/H4	B	KOG1744	Histone H2B
A0A287A7J0	419	K	0.044	0.000439614	Down	Polypeptide N-acetylgalactosaminyltransferase OS=Sus scrofa OX=9823 GN=GALNT6 PE=3 SV=1	GALNT6	1	5.3464e-05	189.58	2	SPHTFPK(1)GINVIAR	0.13005	0.0888155	0.0801657			1.83747	1.99355	endoplasmic reticulum	K00710	GALNT; polypeptide N-acetylgalactosaminyltransferase [EC:2.4.1.41]	map00512 Mucin type O-glycan biosynthesis; map00514 Other types of O-glycan biosynthesis; map01100 Metabolic pathways	GO:0006464 cellular protein modification process; GO:0006486 protein glycosylation; GO:0006493 protein O-linked glycosylation; GO:0006807 nitrogen compound metabolic process; GO:0008152 metabolic process; GO:0009058 biosynthetic process; GO:0009059 macromolecule biosynthetic process; GO:0009100 glycoprotein metabolic process; GO:0009101 glycoprotein biosynthetic process; GO:0009987 cellular proce…	GO:0000139 Golgi membrane; GO:0005622 intracellular; GO:0005623 cell; GO:0005737 cytoplasm; GO:0005794 Golgi apparatus; GO:0012505 endomembrane system; GO:0016020 membrane; GO:0031090 organelle membrane; GO:0031984 organelle subcompartment; GO:0043226 organelle; GO:0043227 membrane-bounded organelle; GO:0043229 intracellular organelle; GO:0043231 intracellular membrane-bounded organelle; GO:00484…	GO:0003824 catalytic activity; GO:0004653 polypeptide N-acetylgalactosaminyltransferase activity; GO:0008194 UDP-glycosyltransferase activity; GO:0008376 acetylgalactosaminyltransferase activity; GO:0016740 transferase activity; GO:0016757 transferase activity, transferring glycosyl groups; GO:0016758 transferase activity, transferring hexosyl groups; GO:0140096 catalytic activity, acting on a pr…	PF00652	Ricin-type beta-trefoil lectin domain	O	KOG3736	Polypeptide N-acetylgalactosaminyltransferase
A0A287A7R4	691	K	7.44	0.00166633	Up	Multifunctional fusion protein OS=Sus scrofa OX=9823 GN=PKM PE=1 SV=1	PKM	1	0.000265267	139.02	2	EMIK(1)SGMNVAR	-0.47424	1.80181	1.38718	2.10009	0.362711	0.17635	0.171851	nucleus	K15258	PARP6_8; poly [ADP-ribose] polymerase 6/8 [EC:2.4.2.30]		GO:0007275 multicellular organism development; GO:0007399 nervous system development; GO:0009987 cellular process; GO:0010720 positive regulation of cell development; GO:0010769 regulation of cell morphogenesis involved in differentiation; GO:0010770 positive regulation of cell morphogenesis involved in differentiation; GO:0010975 regulation of neuron projection development; GO:0010976 positive r…			PF02887	Pyruvate kinase, alpha/beta domain
A0A287A7R4	895	K	9.035	0.00458398	Up	Multifunctional fusion protein OS=Sus scrofa OX=9823 GN=PKM PE=1 SV=1	PKM	1	4.51134e-06	217.14	2	IISK(1)IENHEGVR	-0.68773	1.66035	1.34032	2.40145	0.356477	0.131582	0.10982	nucleus	K15258	PARP6_8; poly [ADP-ribose] polymerase 6/8 [EC:2.4.2.30]		GO:0007275 multicellular organism development; GO:0007399 nervous system development; GO:0009987 cellular process; GO:0010720 positive regulation of cell development; GO:0010769 regulation of cell morphogenesis involved in differentiation; GO:0010770 positive regulation of cell morphogenesis involved in differentiation; GO:0010975 regulation of neuron projection development; GO:0010976 positive r…			PF02887	Pyruvate kinase, alpha/beta domain
A0A287A7R4	714	K	6.342	0.000591942	Up	Multifunctional fusion protein OS=Sus scrofa OX=9823 GN=PKM PE=1 SV=1	PKM	1	4.96066e-56	320.25	4	LNFSHGTHEYHAETIK(1)NVR	0.44239	1.7968	1.89644	1.4896	0.339118	0.289303	0.188743	nucleus	K15258	PARP6_8; poly [ADP-ribose] polymerase 6/8 [EC:2.4.2.30]		GO:0007275 multicellular organism development; GO:0007399 nervous system development; GO:0009987 cellular process; GO:0010720 positive regulation of cell development; GO:0010769 regulation of cell morphogenesis involved in differentiation; GO:0010770 positive regulation of cell morphogenesis involved in differentiation; GO:0010975 regulation of neuron projection development; GO:0010976 positive r…			PF02887	Pyruvate kinase, alpha/beta domain
A0A287A7R4	602	K	5.755	0.0283308	Up	Multifunctional fusion protein OS=Sus scrofa OX=9823 GN=PKM PE=1 SV=1	PKM	1	6.0216e-07	117.54	4	SHPEPTK(1)EHYITGSPSPENTSSSGPK	0.25609	1.18073	1.00429	2.29595	0.358057	0.160981		nucleus	K15258	PARP6_8; poly [ADP-ribose] polymerase 6/8 [EC:2.4.2.30]		GO:0007275 multicellular organism development; GO:0007399 nervous system development; GO:0009987 cellular process; GO:0010720 positive regulation of cell development; GO:0010769 regulation of cell morphogenesis involved in differentiation; GO:0010770 positive regulation of cell morphogenesis involved in differentiation; GO:0010975 regulation of neuron projection development; GO:0010976 positive r…			PF02887	Pyruvate kinase, alpha/beta domain
A0A287B8N7	138	K	12.087	0.000681826	Up	Acyl-CoA thioesterase 7 OS=Sus scrofa OX=9823 GN=ACOT7 PE=1 SV=2	ACOT7	1	1.08506e-06	159.99	2	ATLWYVPLSLK(1)NVDK	0.40755	1.6468	1.90851	1.98622	0.19133	0.0851251	0.182012	mitochondria	K17360	ACOT7; acyl-coenzyme A thioesterase 7 [EC:3.1.2.2]	map00062 Fatty acid elongation; map01040 Biosynthesis of unsaturated fatty acids				PF03061	Thioesterase superfamily	I	KOG2763	Acyl-CoA thioesterase
A0A287B8N7	142	K	4.909	0.00301406	Up	Acyl-CoA thioesterase 7 OS=Sus scrofa OX=9823 GN=ACOT7 PE=1 SV=2	ACOT7	1	1.03848e-06	169.6	2	NVDK(1)VLEVPPVVYSR	-0.67204	1.4933	1.28005	1.62885	0.360815	0.236984		mitochondria	K17360	ACOT7; acyl-coenzyme A thioesterase 7 [EC:3.1.2.2]	map00062 Fatty acid elongation; map01040 Biosynthesis of unsaturated fatty acids				PF03061	Thioesterase superfamily	I	KOG2763	Acyl-CoA thioesterase
A0A287B8N7	237	K	7.21	0.000839889	Up	Acyl-CoA thioesterase 7 OS=Sus scrofa OX=9823 GN=ACOT7 PE=1 SV=2	ACOT7	1	1.22686e-11	182.47	4	HCK(1)TNIVTASVDAINFHDK	-0.0068124	1.72327	1.28882	2.25705	0.30988	0.186203	0.234777	mitochondria	K17360	ACOT7; acyl-coenzyme A thioesterase 7 [EC:3.1.2.2]	map00062 Fatty acid elongation; map01040 Biosynthesis of unsaturated fatty acids				PF03061	Thioesterase superfamily	I	KOG2763	Acyl-CoA thioesterase
A0A287B8N7	127	K	6.338	0.0350036	Up	Acyl-CoA thioesterase 7 OS=Sus scrofa OX=9823 GN=ACOT7 PE=1 SV=2	ACOT7	1	1.32388e-06	157.33	2	LTNK(1)ATLWYVPLSLK	-0.34207	1.26264	1.20886	2.05266	0.379095		0.0967494	mitochondria	K17360	ACOT7; acyl-coenzyme A thioesterase 7 [EC:3.1.2.2]	map00062 Fatty acid elongation; map01040 Biosynthesis of unsaturated fatty acids				PF03061	Thioesterase superfamily	I	KOG2763	Acyl-CoA thioesterase
A0A287A7V3	514	K	0.125	0.00287208	Down	Beta-hexosaminidase OS=Sus scrofa OX=9823 GN=HEXA PE=1 SV=1	HEXA	1	3.22904e-08	222.42	2	AVTNLDFAFK(1)R	0.41293	0.193009	0.191095		2.10076	1.33933	1.1758	extracellular	K12373	HEXA_B; hexosaminidase [EC:3.2.1.52]	map00511 Other glycan degradation; map00513 Various types of N-glycan biosynthesis; map00520 Amino sugar and nucleotide sugar metabolism; map00531 Glycosaminoglycan degradation; map00603 Glycosphingolipid biosynthesis - globo and isoglobo series; map00604 Glycosphingolipid biosynthesis - ganglio series; map01100 Metabolic pathways; map04142 Lysosome	GO:0000003 reproduction; GO:0000902 cell morphogenesis; GO:0000904 cell morphogenesis involved in differentiation; GO:0001501 skeletal system development; GO:0001573 ganglioside metabolic process; GO:0003008 system process; GO:0006022 aminoglycan metabolic process; GO:0006023 aminoglycan biosynthetic process; GO:0006024 glycosaminoglycan biosynthetic process; GO:0006026 aminoglycan catabolic proc…	GO:0000323 lytic vacuole; GO:0005622 intracellular; GO:0005623 cell; GO:0005737 cytoplasm; GO:0005764 lysosome; GO:0005766 primary lysosome; GO:0005773 vacuole; GO:0005775 vacuolar lumen; GO:0012505 endomembrane system; GO:0016020 membrane; GO:0030141 secretory granule; GO:0031410 cytoplasmic vesicle; GO:0031974 membrane-enclosed lumen; GO:0031982 vesicle; GO:0042582 azurophil granule; GO:0043202…	GO:0003824 catalytic activity; GO:0004553 hydrolase activity, hydrolyzing O-glycosyl compounds; GO:0004563 beta-N-acetylhexosaminidase activity; GO:0005488 binding; GO:0005515 protein binding; GO:0008194 UDP-glycosyltransferase activity; GO:0008375 acetylglucosaminyltransferase activity; GO:0015929 hexosaminidase activity; GO:0016740 transferase activity; GO:0016757 transferase activity, transfer…	PF00728	Glycosyl hydrolase family 20, catalytic domain	G	KOG2499	Beta-N-acetylhexosaminidase
A0A287A7V3	102	K	0.09	0.000171286	Down	Beta-hexosaminidase OS=Sus scrofa OX=9823 GN=HEXA PE=1 SV=1	HEXA	1	0.00183251	128.03	3	VEK(1)WHISEK	-1.3683	0.152458	0.130536		1.59963	1.38383	1.73355	extracellular	K12373	HEXA_B; hexosaminidase [EC:3.2.1.52]	map00511 Other glycan degradation; map00513 Various types of N-glycan biosynthesis; map00520 Amino sugar and nucleotide sugar metabolism; map00531 Glycosaminoglycan degradation; map00603 Glycosphingolipid biosynthesis - globo and isoglobo series; map00604 Glycosphingolipid biosynthesis - ganglio series; map01100 Metabolic pathways; map04142 Lysosome	GO:0000003 reproduction; GO:0000902 cell morphogenesis; GO:0000904 cell morphogenesis involved in differentiation; GO:0001501 skeletal system development; GO:0001573 ganglioside metabolic process; GO:0003008 system process; GO:0006022 aminoglycan metabolic process; GO:0006023 aminoglycan biosynthetic process; GO:0006024 glycosaminoglycan biosynthetic process; GO:0006026 aminoglycan catabolic proc…	GO:0000323 lytic vacuole; GO:0005622 intracellular; GO:0005623 cell; GO:0005737 cytoplasm; GO:0005764 lysosome; GO:0005766 primary lysosome; GO:0005773 vacuole; GO:0005775 vacuolar lumen; GO:0012505 endomembrane system; GO:0016020 membrane; GO:0030141 secretory granule; GO:0031410 cytoplasmic vesicle; GO:0031974 membrane-enclosed lumen; GO:0031982 vesicle; GO:0042582 azurophil granule; GO:0043202…	GO:0003824 catalytic activity; GO:0004553 hydrolase activity, hydrolyzing O-glycosyl compounds; GO:0004563 beta-N-acetylhexosaminidase activity; GO:0005488 binding; GO:0005515 protein binding; GO:0008194 UDP-glycosyltransferase activity; GO:0008375 acetylglucosaminyltransferase activity; GO:0015929 hexosaminidase activity; GO:0016740 transferase activity; GO:0016757 transferase activity, transfer…	PF00728	Glycosyl hydrolase family 20, catalytic domain	G	KOG2499	Beta-N-acetylhexosaminidase
A0A287A821	240	K	11.965	7.67776e-05	Up	Threonine synthase-like 1 OS=Sus scrofa OX=9823 GN=THNSL1 PE=1 SV=2	THNSL1	1	0.000271529	154.81	3	HIWPK(1)DCEQK(1)VPTK	-0.57957	1.50092	2.34189	1.69441	0.166645	0.16151	0.134627	mitochondria							PF01202	Shikimate kinase	E	KOG2616	Pyridoxalphosphate-dependent enzyme/predicted threonine synthase
A0A287A821	582	K	16.807	1.84574e-05	Up	Threonine synthase-like 1 OS=Sus scrofa OX=9823 GN=THNSL1 PE=1 SV=2	THNSL1	1	0.000119932	117.83	3	HLHLMANK(1)DGQLMTR	-1.3094	2.09307	1.98289	1.58709	0.131197	0.0998817	0.105863	mitochondria							PF01202	Shikimate kinase	E	KOG2616	Pyridoxalphosphate-dependent enzyme/predicted threonine synthase
A0A287BG49	306	K	4.488	0.000917961	Up	Short-chain-specific acyl-CoA dehydrogenase, mitochondrial OS=Sus scrofa OX=9823 GN=ACADS PE=1 SV=1	ACADS	1	1.05069e-06	184.9	2	AFGVPLTK(1)LQGIQFK	0.43514	1.23489	1.93169	1.74005	0.440723	0.314058	0.338591	mitochondria	K00248	ACADS, bcd; butyryl-CoA dehydrogenase [EC:1.3.8.1]	map00071 Fatty acid degradation; map00280 Valine, leucine and isoleucine degradation; map00410 beta-Alanine metabolism; map00640 Propanoate metabolism; map00650 Butanoate metabolism; map01100 Metabolic pathways; map01200 Carbon metabolism; map01212 Fatty acid metabolism	GO:0006082 organic acid metabolic process; GO:0006629 lipid metabolic process; GO:0006631 fatty acid metabolic process; GO:0006635 fatty acid beta-oxidation; GO:0006950 response to stress; GO:0008152 metabolic process; GO:0009056 catabolic process; GO:0009062 fatty acid catabolic process; GO:0009605 response to external stimulus; GO:0009719 response to endogenous stimulus; GO:0009725 response to …	GO:0005622 intracellular; GO:0005623 cell; GO:0005634 nucleus; GO:0005654 nucleoplasm; GO:0005737 cytoplasm; GO:0005739 mitochondrion; GO:0005740 mitochondrial envelope; GO:0005759 mitochondrial matrix; GO:0016020 membrane; GO:0031090 organelle membrane; GO:0031966 mitochondrial membrane; GO:0031967 organelle envelope; GO:0031974 membrane-enclosed lumen; GO:0031975 envelope; GO:0031981 nuclear lu…	GO:0000062 fatty-acyl-CoA binding; GO:0000166 nucleotide binding; GO:0003824 catalytic activity; GO:0003995 acyl-CoA dehydrogenase activity; GO:0004085 butyryl-CoA dehydrogenase activity; GO:0005488 binding; GO:0016491 oxidoreductase activity; GO:0016627 oxidoreductase activity, acting on the CH-CH group of donors; GO:0017076 purine nucleotide binding; GO:0030554 adenyl nucleotide binding; GO:003…	PF02771; PF02770; PF00441	Acyl-CoA dehydrogenase, N-terminal domain; Acyl-CoA dehydrogenase, middle domain; Acyl-CoA dehydrogenase, C-terminal domain	I	KOG0139	Short-chain acyl-CoA dehydrogenase
A0A287BG49	262	K	4.285	0.00455088	Up	Short-chain-specific acyl-CoA dehydrogenase, mitochondrial OS=Sus scrofa OX=9823 GN=ACADS PE=1 SV=1	ACADS	1	3.87505e-06	127.05	3	ENLLGEPGMGFK(1)IAMQTLDMGR	-0.66191	1.29993	1.86584	1.161		0.325755	0.34748	mitochondria	K00248	ACADS, bcd; butyryl-CoA dehydrogenase [EC:1.3.8.1]	map00071 Fatty acid degradation; map00280 Valine, leucine and isoleucine degradation; map00410 beta-Alanine metabolism; map00640 Propanoate metabolism; map00650 Butanoate metabolism; map01100 Metabolic pathways; map01200 Carbon metabolism; map01212 Fatty acid metabolism	GO:0006082 organic acid metabolic process; GO:0006629 lipid metabolic process; GO:0006631 fatty acid metabolic process; GO:0006635 fatty acid beta-oxidation; GO:0006950 response to stress; GO:0008152 metabolic process; GO:0009056 catabolic process; GO:0009062 fatty acid catabolic process; GO:0009605 response to external stimulus; GO:0009719 response to endogenous stimulus; GO:0009725 response to …	GO:0005622 intracellular; GO:0005623 cell; GO:0005634 nucleus; GO:0005654 nucleoplasm; GO:0005737 cytoplasm; GO:0005739 mitochondrion; GO:0005740 mitochondrial envelope; GO:0005759 mitochondrial matrix; GO:0016020 membrane; GO:0031090 organelle membrane; GO:0031966 mitochondrial membrane; GO:0031967 organelle envelope; GO:0031974 membrane-enclosed lumen; GO:0031975 envelope; GO:0031981 nuclear lu…	GO:0000062 fatty-acyl-CoA binding; GO:0000166 nucleotide binding; GO:0003824 catalytic activity; GO:0003995 acyl-CoA dehydrogenase activity; GO:0004085 butyryl-CoA dehydrogenase activity; GO:0005488 binding; GO:0016491 oxidoreductase activity; GO:0016627 oxidoreductase activity, acting on the CH-CH group of donors; GO:0017076 purine nucleotide binding; GO:0030554 adenyl nucleotide binding; GO:003…	PF02771; PF02770; PF00441	Acyl-CoA dehydrogenase, N-terminal domain; Acyl-CoA dehydrogenase, middle domain; Acyl-CoA dehydrogenase, C-terminal domain	I	KOG0139	Short-chain acyl-CoA dehydrogenase
A0A287BG49	389	K	21.088	0.000102548	Up	Short-chain-specific acyl-CoA dehydrogenase, mitochondrial OS=Sus scrofa OX=9823 GN=ACADS PE=1 SV=1	ACADS	1	2.78967e-06	218.47	3	LVIAGHLLK(1)SYRS	-0.41221	2.50745	1.61607	1.60484	0.0999544	0.0686739	0.103011	mitochondria	K00248	ACADS, bcd; butyryl-CoA dehydrogenase [EC:1.3.8.1]	map00071 Fatty acid degradation; map00280 Valine, leucine and isoleucine degradation; map00410 beta-Alanine metabolism; map00640 Propanoate metabolism; map00650 Butanoate metabolism; map01100 Metabolic pathways; map01200 Carbon metabolism; map01212 Fatty acid metabolism	GO:0006082 organic acid metabolic process; GO:0006629 lipid metabolic process; GO:0006631 fatty acid metabolic process; GO:0006635 fatty acid beta-oxidation; GO:0006950 response to stress; GO:0008152 metabolic process; GO:0009056 catabolic process; GO:0009062 fatty acid catabolic process; GO:0009605 response to external stimulus; GO:0009719 response to endogenous stimulus; GO:0009725 response to …	GO:0005622 intracellular; GO:0005623 cell; GO:0005634 nucleus; GO:0005654 nucleoplasm; GO:0005737 cytoplasm; GO:0005739 mitochondrion; GO:0005740 mitochondrial envelope; GO:0005759 mitochondrial matrix; GO:0016020 membrane; GO:0031090 organelle membrane; GO:0031966 mitochondrial membrane; GO:0031967 organelle envelope; GO:0031974 membrane-enclosed lumen; GO:0031975 envelope; GO:0031981 nuclear lu…	GO:0000062 fatty-acyl-CoA binding; GO:0000166 nucleotide binding; GO:0003824 catalytic activity; GO:0003995 acyl-CoA dehydrogenase activity; GO:0004085 butyryl-CoA dehydrogenase activity; GO:0005488 binding; GO:0016491 oxidoreductase activity; GO:0016627 oxidoreductase activity, acting on the CH-CH group of donors; GO:0017076 purine nucleotide binding; GO:0030554 adenyl nucleotide binding; GO:003…	PF02771; PF02770; PF00441	Acyl-CoA dehydrogenase, N-terminal domain; Acyl-CoA dehydrogenase, middle domain; Acyl-CoA dehydrogenase, C-terminal domain	I	KOG0139	Short-chain acyl-CoA dehydrogenase
A0A287BG49	208	K	3.749	0.0205058	Up	Short-chain-specific acyl-CoA dehydrogenase, mitochondrial OS=Sus scrofa OX=9823 GN=ACADS PE=1 SV=1	ACADS	1	3.98706e-07	125.04	3	SLQNK(1)GISAFLVPMPTPGLTLGK	-0.1081	1.34448	1.75932	1.14127	0.501996	0.252937		mitochondria	K00248	ACADS, bcd; butyryl-CoA dehydrogenase [EC:1.3.8.1]	map00071 Fatty acid degradation; map00280 Valine, leucine and isoleucine degradation; map00410 beta-Alanine metabolism; map00640 Propanoate metabolism; map00650 Butanoate metabolism; map01100 Metabolic pathways; map01200 Carbon metabolism; map01212 Fatty acid metabolism	GO:0006082 organic acid metabolic process; GO:0006629 lipid metabolic process; GO:0006631 fatty acid metabolic process; GO:0006635 fatty acid beta-oxidation; GO:0006950 response to stress; GO:0008152 metabolic process; GO:0009056 catabolic process; GO:0009062 fatty acid catabolic process; GO:0009605 response to external stimulus; GO:0009719 response to endogenous stimulus; GO:0009725 response to …	GO:0005622 intracellular; GO:0005623 cell; GO:0005634 nucleus; GO:0005654 nucleoplasm; GO:0005737 cytoplasm; GO:0005739 mitochondrion; GO:0005740 mitochondrial envelope; GO:0005759 mitochondrial matrix; GO:0016020 membrane; GO:0031090 organelle membrane; GO:0031966 mitochondrial membrane; GO:0031967 organelle envelope; GO:0031974 membrane-enclosed lumen; GO:0031975 envelope; GO:0031981 nuclear lu…	GO:0000062 fatty-acyl-CoA binding; GO:0000166 nucleotide binding; GO:0003824 catalytic activity; GO:0003995 acyl-CoA dehydrogenase activity; GO:0004085 butyryl-CoA dehydrogenase activity; GO:0005488 binding; GO:0016491 oxidoreductase activity; GO:0016627 oxidoreductase activity, acting on the CH-CH group of donors; GO:0017076 purine nucleotide binding; GO:0030554 adenyl nucleotide binding; GO:003…	PF02771; PF02770; PF00441	Acyl-CoA dehydrogenase, N-terminal domain; Acyl-CoA dehydrogenase, middle domain; Acyl-CoA dehydrogenase, C-terminal domain	I	KOG0139	Short-chain acyl-CoA dehydrogenase
I3LHA2	1570	K	38.315	0.00392906	Up	[Histone H3]-lysine(4) N-trimethyltransferase OS=Sus scrofa OX=9823 GN=KMT2C PE=4 SV=2	KMT2C	1	0.00955118	87.719	2	SK(1)QQAK(1)IEATQK(1)LEQVK	3.6087	1.96571	1.02763	2.85405	0.0923829	0.0469381	0.0132925	nucleus	K09188	MLL3; [histone H3]-lysine4 N-trimethyltransferase MLL3 [EC:2.1.1.354]	map00310 Lysine degradation; map01100 Metabolic pathways	GO:0000003 reproduction; GO:0001654 eye development; GO:0002682 regulation of immune system process; GO:0006325 chromatin organization; GO:0006464 cellular protein modification process; GO:0006479 protein methylation; GO:0006807 nitrogen compound metabolic process; GO:0006996 organelle organization; GO:0007275 multicellular organism development; GO:0007338 single fertilization; GO:0007423 sensory…	GO:0005622 intracellular; GO:0005623 cell; GO:0005634 nucleus; GO:0005654 nucleoplasm; GO:0031974 membrane-enclosed lumen; GO:0031981 nuclear lumen; GO:0032991 protein-containing complex; GO:0034708 methyltransferase complex; GO:0035097 histone methyltransferase complex; GO:0043226 organelle; GO:0043227 membrane-bounded organelle; GO:0043229 intracellular organelle; GO:0043231 intracellular membr…	GO:0003824 catalytic activity; GO:0008168 methyltransferase activity; GO:0008170 N-methyltransferase activity; GO:0008276 protein methyltransferase activity; GO:0008757 S-adenosylmethionine-dependent methyltransferase activity; GO:0016278 lysine N-methyltransferase activity; GO:0016279 protein-lysine N-methyltransferase activity; GO:0016740 transferase activity; GO:0016741 transferase activity, t…	PF13771; PF00628; PF13832	PHD-like zinc-binding domain; PHD-finger; PHD-zinc-finger like domain	K	KOG4443	Putative transcription factor HALR/MLL3, involved in embryonic development
I3LHA2	1574	K	38.315	0.00392906	Up	[Histone H3]-lysine(4) N-trimethyltransferase OS=Sus scrofa OX=9823 GN=KMT2C PE=4 SV=2	KMT2C	1	0.00955118	87.719	2	SK(1)QQAK(1)IEATQK(1)LEQVK	3.6087	1.96571	1.02763	2.85405	0.0923829	0.0469381	0.0132925	nucleus	K09188	MLL3; [histone H3]-lysine4 N-trimethyltransferase MLL3 [EC:2.1.1.354]	map00310 Lysine degradation; map01100 Metabolic pathways	GO:0000003 reproduction; GO:0001654 eye development; GO:0002682 regulation of immune system process; GO:0006325 chromatin organization; GO:0006464 cellular protein modification process; GO:0006479 protein methylation; GO:0006807 nitrogen compound metabolic process; GO:0006996 organelle organization; GO:0007275 multicellular organism development; GO:0007338 single fertilization; GO:0007423 sensory…	GO:0005622 intracellular; GO:0005623 cell; GO:0005634 nucleus; GO:0005654 nucleoplasm; GO:0031974 membrane-enclosed lumen; GO:0031981 nuclear lumen; GO:0032991 protein-containing complex; GO:0034708 methyltransferase complex; GO:0035097 histone methyltransferase complex; GO:0043226 organelle; GO:0043227 membrane-bounded organelle; GO:0043229 intracellular organelle; GO:0043231 intracellular membr…	GO:0003824 catalytic activity; GO:0008168 methyltransferase activity; GO:0008170 N-methyltransferase activity; GO:0008276 protein methyltransferase activity; GO:0008757 S-adenosylmethionine-dependent methyltransferase activity; GO:0016278 lysine N-methyltransferase activity; GO:0016279 protein-lysine N-methyltransferase activity; GO:0016740 transferase activity; GO:0016741 transferase activity, t…	PF13771; PF00628; PF13832	PHD-like zinc-binding domain; PHD-finger; PHD-zinc-finger like domain	K	KOG4443	Putative transcription factor HALR/MLL3, involved in embryonic development
I3LHA2	1580	K	38.315	0.00392906	Up	[Histone H3]-lysine(4) N-trimethyltransferase OS=Sus scrofa OX=9823 GN=KMT2C PE=4 SV=2	KMT2C	1	0.00955118	87.719	2	SK(1)QQAK(1)IEATQK(1)LEQVK	3.6087	1.96571	1.02763	2.85405	0.0923829	0.0469381	0.0132925	nucleus	K09188	MLL3; [histone H3]-lysine4 N-trimethyltransferase MLL3 [EC:2.1.1.354]	map00310 Lysine degradation; map01100 Metabolic pathways	GO:0000003 reproduction; GO:0001654 eye development; GO:0002682 regulation of immune system process; GO:0006325 chromatin organization; GO:0006464 cellular protein modification process; GO:0006479 protein methylation; GO:0006807 nitrogen compound metabolic process; GO:0006996 organelle organization; GO:0007275 multicellular organism development; GO:0007338 single fertilization; GO:0007423 sensory…	GO:0005622 intracellular; GO:0005623 cell; GO:0005634 nucleus; GO:0005654 nucleoplasm; GO:0031974 membrane-enclosed lumen; GO:0031981 nuclear lumen; GO:0032991 protein-containing complex; GO:0034708 methyltransferase complex; GO:0035097 histone methyltransferase complex; GO:0043226 organelle; GO:0043227 membrane-bounded organelle; GO:0043229 intracellular organelle; GO:0043231 intracellular membr…	GO:0003824 catalytic activity; GO:0008168 methyltransferase activity; GO:0008170 N-methyltransferase activity; GO:0008276 protein methyltransferase activity; GO:0008757 S-adenosylmethionine-dependent methyltransferase activity; GO:0016278 lysine N-methyltransferase activity; GO:0016279 protein-lysine N-methyltransferase activity; GO:0016740 transferase activity; GO:0016741 transferase activity, t…	PF13771; PF00628; PF13832	PHD-like zinc-binding domain; PHD-finger; PHD-zinc-finger like domain	K	KOG4443	Putative transcription factor HALR/MLL3, involved in embryonic development
A0A287A9I8	66	K	18.036	0.000416059	Up	ATP synthase subunit gamma OS=Sus scrofa OX=9823 GN=ATP5F1C PE=1 SV=2	ATP5F1C	1	4.48544e-13	244.24	3	K(1)HLIIGVSSDR	0.12083	1.66008	1.5812	2.44353	0.147671	0.101623	0.0658968	mitochondria	K02136	ATPeF1G, ATP5C1, ATP3; F-type H+-transporting ATPase subunit gamma	map00190 Oxidative phosphorylation; map01100 Metabolic pathways; map04714 Thermogenesis; map05010 Alzheimer disease; map05012 Parkinson disease; map05016 Huntington disease	GO:0006091 generation of precursor metabolites and energy; GO:0006119 oxidative phosphorylation; GO:0006139 nucleobase-containing compound metabolic process; GO:0006163 purine nucleotide metabolic process; GO:0006164 purine nucleotide biosynthetic process; GO:0006725 cellular aromatic compound metabolic process; GO:0006753 nucleoside phosphate metabolic process; GO:0006754 ATP biosynthetic proces…	GO:0000275 mitochondrial proton-transporting ATP synthase complex, catalytic sector F(1); GO:0005622 intracellular; GO:0005623 cell; GO:0005737 cytoplasm; GO:0005739 mitochondrion; GO:0005740 mitochondrial envelope; GO:0005743 mitochondrial inner membrane; GO:0005753 mitochondrial proton-transporting ATP synthase complex; GO:0005759 mitochondrial matrix; GO:0016020 membrane; GO:0016469 proton-tra…	GO:0003824 catalytic activity; GO:0005215 transporter activity; GO:0016462 pyrophosphatase activity; GO:0016787 hydrolase activity; GO:0016817 hydrolase activity, acting on acid anhydrides; GO:0016818 hydrolase activity, acting on acid anhydrides, in phosphorus-containing anhydrides; GO:0016887 ATPase activity; GO:0017111 nucleoside-triphosphatase activity; GO:0022857 transmembrane transporter ac…	PF00231	ATP synthase	C	KOG1531	F0F1-type ATP synthase, gamma subunit
A0A287A9I8	238	K	4.294	0.0366704	Up	ATP synthase subunit gamma OS=Sus scrofa OX=9823 GN=ATP5F1C PE=1 SV=2	ATP5F1C	1	2.4141e-43	302.28	2	MTAMDNASK(1)NASEMIDK	-0.81589	1.30779	1.17205	1.84815	0.500644	0.171365		mitochondria	K02136	ATPeF1G, ATP5C1, ATP3; F-type H+-transporting ATPase subunit gamma	map00190 Oxidative phosphorylation; map01100 Metabolic pathways; map04714 Thermogenesis; map05010 Alzheimer disease; map05012 Parkinson disease; map05016 Huntington disease	GO:0006091 generation of precursor metabolites and energy; GO:0006119 oxidative phosphorylation; GO:0006139 nucleobase-containing compound metabolic process; GO:0006163 purine nucleotide metabolic process; GO:0006164 purine nucleotide biosynthetic process; GO:0006725 cellular aromatic compound metabolic process; GO:0006753 nucleoside phosphate metabolic process; GO:0006754 ATP biosynthetic proces…	GO:0000275 mitochondrial proton-transporting ATP synthase complex, catalytic sector F(1); GO:0005622 intracellular; GO:0005623 cell; GO:0005737 cytoplasm; GO:0005739 mitochondrion; GO:0005740 mitochondrial envelope; GO:0005743 mitochondrial inner membrane; GO:0005753 mitochondrial proton-transporting ATP synthase complex; GO:0005759 mitochondrial matrix; GO:0016020 membrane; GO:0016469 proton-tra…	GO:0003824 catalytic activity; GO:0005215 transporter activity; GO:0016462 pyrophosphatase activity; GO:0016787 hydrolase activity; GO:0016817 hydrolase activity, acting on acid anhydrides; GO:0016818 hydrolase activity, acting on acid anhydrides, in phosphorus-containing anhydrides; GO:0016887 ATPase activity; GO:0017111 nucleoside-triphosphatase activity; GO:0022857 transmembrane transporter ac…	PF00231	ATP synthase	C	KOG1531	F0F1-type ATP synthase, gamma subunit
A0A287A9I8	91	K	9.588	0.00257895	Up	ATP synthase subunit gamma OS=Sus scrofa OX=9823 GN=ATP5F1C PE=1 SV=2	ATP5F1C	1	1.56419e-10	238.92	2	QIK(1)SEVANLTAAGK	0.24297	1.92458	1.30582	2.20294	0.303776	0.158648	0.104231	mitochondria	K02136	ATPeF1G, ATP5C1, ATP3; F-type H+-transporting ATPase subunit gamma	map00190 Oxidative phosphorylation; map01100 Metabolic pathways; map04714 Thermogenesis; map05010 Alzheimer disease; map05012 Parkinson disease; map05016 Huntington disease	GO:0006091 generation of precursor metabolites and energy; GO:0006119 oxidative phosphorylation; GO:0006139 nucleobase-containing compound metabolic process; GO:0006163 purine nucleotide metabolic process; GO:0006164 purine nucleotide biosynthetic process; GO:0006725 cellular aromatic compound metabolic process; GO:0006753 nucleoside phosphate metabolic process; GO:0006754 ATP biosynthetic proces…	GO:0000275 mitochondrial proton-transporting ATP synthase complex, catalytic sector F(1); GO:0005622 intracellular; GO:0005623 cell; GO:0005737 cytoplasm; GO:0005739 mitochondrion; GO:0005740 mitochondrial envelope; GO:0005743 mitochondrial inner membrane; GO:0005753 mitochondrial proton-transporting ATP synthase complex; GO:0005759 mitochondrial matrix; GO:0016020 membrane; GO:0016469 proton-tra…	GO:0003824 catalytic activity; GO:0005215 transporter activity; GO:0016462 pyrophosphatase activity; GO:0016787 hydrolase activity; GO:0016817 hydrolase activity, acting on acid anhydrides; GO:0016818 hydrolase activity, acting on acid anhydrides, in phosphorus-containing anhydrides; GO:0016887 ATPase activity; GO:0017111 nucleoside-triphosphatase activity; GO:0022857 transmembrane transporter ac…	PF00231	ATP synthase	C	KOG1531	F0F1-type ATP synthase, gamma subunit
A0A287A9I8	173	K	34.711	0.0006569	Up	ATP synthase subunit gamma OS=Sus scrofa OX=9823 GN=ATP5F1C PE=1 SV=2	ATP5F1C	1	2.26454e-42	229.71	2	SVISYK(1)TEEK	-0.14883	2.0806	1.84087	1.91051	0.102915	0.0333116	0.0317885	mitochondria	K02136	ATPeF1G, ATP5C1, ATP3; F-type H+-transporting ATPase subunit gamma	map00190 Oxidative phosphorylation; map01100 Metabolic pathways; map04714 Thermogenesis; map05010 Alzheimer disease; map05012 Parkinson disease; map05016 Huntington disease	GO:0006091 generation of precursor metabolites and energy; GO:0006119 oxidative phosphorylation; GO:0006139 nucleobase-containing compound metabolic process; GO:0006163 purine nucleotide metabolic process; GO:0006164 purine nucleotide biosynthetic process; GO:0006725 cellular aromatic compound metabolic process; GO:0006753 nucleoside phosphate metabolic process; GO:0006754 ATP biosynthetic proces…	GO:0000275 mitochondrial proton-transporting ATP synthase complex, catalytic sector F(1); GO:0005622 intracellular; GO:0005623 cell; GO:0005737 cytoplasm; GO:0005739 mitochondrion; GO:0005740 mitochondrial envelope; GO:0005743 mitochondrial inner membrane; GO:0005753 mitochondrial proton-transporting ATP synthase complex; GO:0005759 mitochondrial matrix; GO:0016020 membrane; GO:0016469 proton-tra…	GO:0003824 catalytic activity; GO:0005215 transporter activity; GO:0016462 pyrophosphatase activity; GO:0016787 hydrolase activity; GO:0016817 hydrolase activity, acting on acid anhydrides; GO:0016818 hydrolase activity, acting on acid anhydrides, in phosphorus-containing anhydrides; GO:0016887 ATPase activity; GO:0017111 nucleoside-triphosphatase activity; GO:0022857 transmembrane transporter ac…	PF00231	ATP synthase	C	KOG1531	F0F1-type ATP synthase, gamma subunit
F1S297	135	K	29.716	0.000285138	Up	Isocitrate dehydrogenase [NAD] subunit, mitochondrial OS=Sus scrofa OX=9823 GN=IDH3G PE=1 SV=3	IDH3G	1	4.08331e-17	194.88	3	TSLDLYANVIHCK(1)SLPGVVTR	-0.26696	1.56727	1.33169	2.90571	0.0735677	0.0746876	0.0470817	mitochondria	K00030	IDH3; isocitrate dehydrogenase (NAD+) [EC:1.1.1.41]	map00020 Citrate cycle (TCA cycle); map01100 Metabolic pathways; map01200 Carbon metabolism; map01210 2-Oxocarboxylic acid metabolism; map01230 Biosynthesis of amino acids	GO:0005975 carbohydrate metabolic process; GO:0006082 organic acid metabolic process; GO:0006091 generation of precursor metabolites and energy; GO:0006099 tricarboxylic acid cycle; GO:0006101 citrate metabolic process; GO:0006102 isocitrate metabolic process; GO:0006103 2-oxoglutarate metabolic process; GO:0006139 nucleobase-containing compound metabolic process; GO:0006725 cellular aromatic com…	GO:0005622 intracellular; GO:0005623 cell; GO:0005634 nucleus; GO:0005654 nucleoplasm; GO:0005730 nucleolus; GO:0005737 cytoplasm; GO:0005739 mitochondrion; GO:0005759 mitochondrial matrix; GO:0005962 mitochondrial isocitrate dehydrogenase complex (NAD+); GO:0030062 mitochondrial tricarboxylic acid cycle enzyme complex; GO:0031974 membrane-enclosed lumen; GO:0031981 nuclear lumen; GO:0032991 prot…	GO:0000287 magnesium ion binding; GO:0003824 catalytic activity; GO:0004448 isocitrate dehydrogenase activity; GO:0004449 isocitrate dehydrogenase (NAD+) activity; GO:0005488 binding; GO:0016491 oxidoreductase activity; GO:0016614 oxidoreductase activity, acting on CH-OH group of donors; GO:0016616 oxidoreductase activity, acting on the CH-OH group of donors, NAD or NADP as acceptor; GO:0043167 i…	PF00180	Isocitrate/isopropylmalate dehydrogenase	C	KOG0784	Isocitrate dehydrogenase, gamma subunit
A0A287AA21	139	K	20.278	0.000317685	Up	Enoyl-CoA hydratase, mitochondrial OS=Sus scrofa OX=9823 GN=ECHS1 PE=1 SV=2	ECHS1	1	2.67594e-146	404.47	4	AFAAGADIK(1)EMQNQTFQDCYSGGFLSHWDHLSR	0.4262	2.63466		2.02096	0.096066	0.133847	0.11447	mitochondria	K07511	ECHS1; enoyl-CoA hydratase [EC:4.2.1.17]	map00062 Fatty acid elongation; map00071 Fatty acid degradation; map00280 Valine, leucine and isoleucine degradation; map00310 Lysine degradation; map00380 Tryptophan metabolism; map00410 beta-Alanine metabolism; map00640 Propanoate metabolism; map00650 Butanoate metabolism; map01100 Metabolic pathways; map01200 Carbon metabolism; map01212 Fatty acid metabolism	GO:0006082 organic acid metabolic process; GO:0006629 lipid metabolic process; GO:0006631 fatty acid metabolic process; GO:0006635 fatty acid beta-oxidation; GO:0008152 metabolic process; GO:0009056 catabolic process; GO:0009062 fatty acid catabolic process; GO:0009987 cellular process; GO:0016042 lipid catabolic process; GO:0016054 organic acid catabolic process; GO:0019395 fatty acid oxidation;…	GO:0005622 intracellular; GO:0005623 cell; GO:0005737 cytoplasm; GO:0005739 mitochondrion; GO:0005759 mitochondrial matrix; GO:0031974 membrane-enclosed lumen; GO:0043226 organelle; GO:0043227 membrane-bounded organelle; GO:0043229 intracellular organelle; GO:0043231 intracellular membrane-bounded organelle; GO:0043233 organelle lumen; GO:0070013 intracellular organelle lumen;	GO:0003824 catalytic activity; GO:0004300 enoyl-CoA hydratase activity; GO:0016829 lyase activity; GO:0016835 carbon-oxygen lyase activity; GO:0016836 hydro-lyase activity;	PF00378	Enoyl-CoA hydratase/isomerase family	I	KOG1680	Enoyl-CoA hydratase
A0A287AA21	320	K	6.846	0.0125963	Up	Enoyl-CoA hydratase, mitochondrial OS=Sus scrofa OX=9823 GN=ECHS1 PE=1 SV=2	ECHS1	1	0.00959304	88.364	2	EGMTAFVEK(1)R	0.70354	1.44063	1.29248	1.82318	0.319528	0.124176		mitochondria	K07511	ECHS1; enoyl-CoA hydratase [EC:4.2.1.17]	map00062 Fatty acid elongation; map00071 Fatty acid degradation; map00280 Valine, leucine and isoleucine degradation; map00310 Lysine degradation; map00380 Tryptophan metabolism; map00410 beta-Alanine metabolism; map00640 Propanoate metabolism; map00650 Butanoate metabolism; map01100 Metabolic pathways; map01200 Carbon metabolism; map01212 Fatty acid metabolism	GO:0006082 organic acid metabolic process; GO:0006629 lipid metabolic process; GO:0006631 fatty acid metabolic process; GO:0006635 fatty acid beta-oxidation; GO:0008152 metabolic process; GO:0009056 catabolic process; GO:0009062 fatty acid catabolic process; GO:0009987 cellular process; GO:0016042 lipid catabolic process; GO:0016054 organic acid catabolic process; GO:0019395 fatty acid oxidation;…	GO:0005622 intracellular; GO:0005623 cell; GO:0005737 cytoplasm; GO:0005739 mitochondrion; GO:0005759 mitochondrial matrix; GO:0031974 membrane-enclosed lumen; GO:0043226 organelle; GO:0043227 membrane-bounded organelle; GO:0043229 intracellular organelle; GO:0043231 intracellular membrane-bounded organelle; GO:0043233 organelle lumen; GO:0070013 intracellular organelle lumen;	GO:0003824 catalytic activity; GO:0004300 enoyl-CoA hydratase activity; GO:0016829 lyase activity; GO:0016835 carbon-oxygen lyase activity; GO:0016836 hydro-lyase activity;	PF00378	Enoyl-CoA hydratase/isomerase family	I	KOG1680	Enoyl-CoA hydratase
A0A287AA21	81	K	34.123	0.00143034	Up	Enoyl-CoA hydratase, mitochondrial OS=Sus scrofa OX=9823 GN=ECHS1 PE=1 SV=2	ECHS1	1	5.79872e-96	376.25	2	GK(1)SSNVGLIQLNRPK	0.042881	1.85701	1.5273	2.44486	0.109275	0.0233578	0.0381957	mitochondria	K07511	ECHS1; enoyl-CoA hydratase [EC:4.2.1.17]	map00062 Fatty acid elongation; map00071 Fatty acid degradation; map00280 Valine, leucine and isoleucine degradation; map00310 Lysine degradation; map00380 Tryptophan metabolism; map00410 beta-Alanine metabolism; map00640 Propanoate metabolism; map00650 Butanoate metabolism; map01100 Metabolic pathways; map01200 Carbon metabolism; map01212 Fatty acid metabolism	GO:0006082 organic acid metabolic process; GO:0006629 lipid metabolic process; GO:0006631 fatty acid metabolic process; GO:0006635 fatty acid beta-oxidation; GO:0008152 metabolic process; GO:0009056 catabolic process; GO:0009062 fatty acid catabolic process; GO:0009987 cellular process; GO:0016042 lipid catabolic process; GO:0016054 organic acid catabolic process; GO:0019395 fatty acid oxidation;…	GO:0005622 intracellular; GO:0005623 cell; GO:0005737 cytoplasm; GO:0005739 mitochondrion; GO:0005759 mitochondrial matrix; GO:0031974 membrane-enclosed lumen; GO:0043226 organelle; GO:0043227 membrane-bounded organelle; GO:0043229 intracellular organelle; GO:0043231 intracellular membrane-bounded organelle; GO:0043233 organelle lumen; GO:0070013 intracellular organelle lumen;	GO:0003824 catalytic activity; GO:0004300 enoyl-CoA hydratase activity; GO:0016829 lyase activity; GO:0016835 carbon-oxygen lyase activity; GO:0016836 hydro-lyase activity;	PF00378	Enoyl-CoA hydratase/isomerase family	I	KOG1680	Enoyl-CoA hydratase
A0A287AA21	94	K	3.783	0.0112545	Up	Enoyl-CoA hydratase, mitochondrial OS=Sus scrofa OX=9823 GN=ECHS1 PE=1 SV=2	ECHS1	1	0.000289903	179.21	2	PK(1)ALNALCK	-1.0226	1.47849	1.44979	1.81725	0.702539	0.28967	0.262259	mitochondria	K07511	ECHS1; enoyl-CoA hydratase [EC:4.2.1.17]	map00062 Fatty acid elongation; map00071 Fatty acid degradation; map00280 Valine, leucine and isoleucine degradation; map00310 Lysine degradation; map00380 Tryptophan metabolism; map00410 beta-Alanine metabolism; map00640 Propanoate metabolism; map00650 Butanoate metabolism; map01100 Metabolic pathways; map01200 Carbon metabolism; map01212 Fatty acid metabolism	GO:0006082 organic acid metabolic process; GO:0006629 lipid metabolic process; GO:0006631 fatty acid metabolic process; GO:0006635 fatty acid beta-oxidation; GO:0008152 metabolic process; GO:0009056 catabolic process; GO:0009062 fatty acid catabolic process; GO:0009987 cellular process; GO:0016042 lipid catabolic process; GO:0016054 organic acid catabolic process; GO:0019395 fatty acid oxidation;…	GO:0005622 intracellular; GO:0005623 cell; GO:0005737 cytoplasm; GO:0005739 mitochondrion; GO:0005759 mitochondrial matrix; GO:0031974 membrane-enclosed lumen; GO:0043226 organelle; GO:0043227 membrane-bounded organelle; GO:0043229 intracellular organelle; GO:0043231 intracellular membrane-bounded organelle; GO:0043233 organelle lumen; GO:0070013 intracellular organelle lumen;	GO:0003824 catalytic activity; GO:0004300 enoyl-CoA hydratase activity; GO:0016829 lyase activity; GO:0016835 carbon-oxygen lyase activity; GO:0016836 hydro-lyase activity;	PF00378	Enoyl-CoA hydratase/isomerase family	I	KOG1680	Enoyl-CoA hydratase
A0A287AA97	551	K	6.738	0.0182321	Up	HECT-type E3 ubiquitin transferase OS=Sus scrofa OX=9823 GN=HUWE1 PE=1 SV=1	HUWE1	1	0.00561488	103.55	2	AALLK(1)SMLNFLK	0.33131	1.28927	1.33363	1.92695	0.335022		0.115124	plasma membrane	K10592	HUWE1, MULE, ARF-BP1; E3 ubiquitin-protein ligase HUWE1 [EC:2.3.2.26]	map04120 Ubiquitin mediated proteolysis	GO:0000209 protein polyubiquitination; GO:0001775 cell activation; GO:0002252 immune effector process; GO:0002263 cell activation involved in immune response; GO:0002274 myeloid leukocyte activation; GO:0002275 myeloid cell activation involved in immune response; GO:0002283 neutrophil activation involved in immune response; GO:0002366 leukocyte activation involved in immune response; GO:0002376 i…	GO:0005576 extracellular region; GO:0005622 intracellular; GO:0005623 cell; GO:0005634 nucleus; GO:0005654 nucleoplasm; GO:0005737 cytoplasm; GO:0005829 cytosol; GO:0012505 endomembrane system; GO:0030141 secretory granule; GO:0031410 cytoplasmic vesicle; GO:0031974 membrane-enclosed lumen; GO:0031981 nuclear lumen; GO:0031982 vesicle; GO:0031983 vesicle lumen; GO:0034774 secretory granule lumen;…	GO:0003676 nucleic acid binding; GO:0003677 DNA binding; GO:0003824 catalytic activity; GO:0004842 ubiquitin-protein transferase activity; GO:0005488 binding; GO:0016740 transferase activity; GO:0019787 ubiquitin-like protein transferase activity; GO:0061630 ubiquitin protein ligase activity; GO:0061659 ubiquitin-like protein ligase activity; GO:0097159 organic cyclic compound binding; GO:0140096…	PF00627; PF00632	UBA/TS-N domain; HECT-domain (ubiquitin-transferase)	KO	KOG0939	E3 ubiquitin-protein ligase/Putative upstream regulatory element binding protein
A0A287AAI9	256	K	11.664	0.00144674	Up	Hydroxyacylglutathione hydrolase OS=Sus scrofa OX=9823 GN=HAGH PE=1 SV=1	HAGH	1	0.0010819	174.02	2	DHFK(1)VPR	-0.037932	1.88016	1.10796	2.53808	0.219969	0.112426	0.141406	cytoplasm	K01069	gloB, gloC, HAGH; hydroxyacylglutathione hydrolase [EC:3.1.2.6]	map00620 Pyruvate metabolism; map01100 Metabolic pathways				PF00753	Metallo-beta-lactamase superfamily	S	KOG0813	Glyoxylase
A0A5G2R288	155	K	3.59	0.037696	Up	BRO1 domain- and CAAX motif-containing protein OS=Sus scrofa OX=9823 GN=BROX PE=3 SV=1	BROX	1	0.0290351	43.282	3	IAAGIFK(1)HLK	-0.68804	2.05222	0.999945	1.16483	0.502547		0.280454	mitochondria							PF03097	BRO1-like domain
A0A5G2R332	208	K	9.23	0.00176004	Up	FAA_hydrolase domain-containing protein OS=Sus scrofa OX=9823 GN=LOC100522130 PE=1 SV=1	LOC100522130	1	7.2116e-15	256.92	3	DSVADPHNLK(1)ICCR	0.054362	2.48605	1.51912	1.4083	0.276403	0.19149	0.118632	cytoplasm									Q	KOG1535	Predicted fumarylacetoacetate hydralase
A0A5G2R332	183	K	8.067	0.00835199	Up	FAA_hydrolase domain-containing protein OS=Sus scrofa OX=9823 GN=LOC100522130 PE=1 SV=1	LOC100522130	1	5.17518e-08	151.87	2	QWLLGK(1)TFDTFCPLGPALVTK	0.028696	1.0397	1.33968	2.23897	0.151486	0.230168		cytoplasm									Q	KOG1535	Predicted fumarylacetoacetate hydralase
A0A287AAR5	151	K	4.303	0.00791817	Up	Acyl carrier protein OS=Sus scrofa OX=9823 GN=NDUFAB1 PE=1 SV=1	NDUFAB1	1	1.20085e-08	156.69	2	LMCPQEIVDYIADK(1)K	-0.18078	1.46521	1.78049		0.344468	0.40983		mitochondria	K03955	NDUFAB1; NADH dehydrogenase (ubiquinone) 1 alpha/beta subcomplex 1, acyl-carrier protein	map00190 Oxidative phosphorylation; map01100 Metabolic pathways; map04714 Thermogenesis; map04723 Retrograde endocannabinoid signaling; map04932 Non-alcoholic fatty liver disease (NAFLD); map05010 Alzheimer disease; map05012 Parkinson disease; map05016 Huntington disease	GO:0005975 carbohydrate metabolic process; GO:0006082 organic acid metabolic process; GO:0006091 generation of precursor metabolites and energy; GO:0006119 oxidative phosphorylation; GO:0006120 mitochondrial electron transport, NADH to ubiquinone; GO:0006139 nucleobase-containing compound metabolic process; GO:0006163 purine nucleotide metabolic process; GO:0006464 cellular protein modification p…	GO:0005622 intracellular; GO:0005623 cell; GO:0005634 nucleus; GO:0005654 nucleoplasm; GO:0005737 cytoplasm; GO:0005739 mitochondrion; GO:0005740 mitochondrial envelope; GO:0005743 mitochondrial inner membrane; GO:0005746 mitochondrial respirasome; GO:0005747 mitochondrial respiratory chain complex I; GO:0005759 mitochondrial matrix; GO:0005829 cytosol; GO:0016020 membrane; GO:0019866 organelle i…	GO:0000035 acyl binding; GO:0000036 acyl carrier activity; GO:0003824 catalytic activity; GO:0003954 NADH dehydrogenase activity; GO:0005488 binding; GO:0005504 fatty acid binding; GO:0005509 calcium ion binding; GO:0008137 NADH dehydrogenase (ubiquinone) activity; GO:0008289 lipid binding; GO:0016491 oxidoreductase activity; GO:0016651 oxidoreductase activity, acting on NAD(P)H; GO:0016655 oxido…	PF00550	Phosphopantetheine attachment site	C	KOG1748	Acyl carrier protein/NADH-ubiquinone oxidoreductase, NDUFAB1/SDAP subunit
A0A287AL53	101	K	10.497	0.00420901	Up	Abhydrolase domain containing 10, depalmitoylase OS=Sus scrofa OX=9823 GN=ABHD10 PE=1 SV=1	ABHD10	1	4.42774e-11	177.42	3	ALAIEDFCK(1)SLGHAYIR	2.3323	1.79795	2.8616	0.818577	0.15351	0.153804	0.214556	mitochondria	K13702	ABHD10; abhydrolase domain-containing protein 10 [EC:3.1.1.93]		GO:0005975 carbohydrate metabolic process; GO:0005996 monosaccharide metabolic process; GO:0006063 uronic acid metabolic process; GO:0006082 organic acid metabolic process; GO:0008152 metabolic process; GO:0009056 catabolic process; GO:0009987 cellular process; GO:0016052 carbohydrate catabolic process; GO:0016054 organic acid catabolic process; GO:0016137 glycoside metabolic process; GO:0016139 …	GO:0005622 intracellular; GO:0005623 cell; GO:0005737 cytoplasm; GO:0005739 mitochondrion; GO:0005759 mitochondrial matrix; GO:0005829 cytosol; GO:0031974 membrane-enclosed lumen; GO:0043226 organelle; GO:0043227 membrane-bounded organelle; GO:0043229 intracellular organelle; GO:0043231 intracellular membrane-bounded organelle; GO:0043233 organelle lumen; GO:0070013 intracellular organelle lumen;	GO:0003824 catalytic activity; GO:0004553 hydrolase activity, hydrolyzing O-glycosyl compounds; GO:0016787 hydrolase activity; GO:0016798 hydrolase activity, acting on glycosyl bonds;
A0A287AL53	129	K	6.478	0.0257467	Up	Abhydrolase domain containing 10, depalmitoylase OS=Sus scrofa OX=9823 GN=ABHD10 PE=1 SV=1	ABHD10	1	0.00276773	143.56	2	ECTVGK(1)WR	-0.73467		2.07256	1.98733	0.568963	0.20316	0.167991	mitochondria	K13702	ABHD10; abhydrolase domain-containing protein 10 [EC:3.1.1.93]		GO:0005975 carbohydrate metabolic process; GO:0005996 monosaccharide metabolic process; GO:0006063 uronic acid metabolic process; GO:0006082 organic acid metabolic process; GO:0008152 metabolic process; GO:0009056 catabolic process; GO:0009987 cellular process; GO:0016052 carbohydrate catabolic process; GO:0016054 organic acid catabolic process; GO:0016137 glycoside metabolic process; GO:0016139 …	GO:0005622 intracellular; GO:0005623 cell; GO:0005737 cytoplasm; GO:0005739 mitochondrion; GO:0005759 mitochondrial matrix; GO:0005829 cytosol; GO:0031974 membrane-enclosed lumen; GO:0043226 organelle; GO:0043227 membrane-bounded organelle; GO:0043229 intracellular organelle; GO:0043231 intracellular membrane-bounded organelle; GO:0043233 organelle lumen; GO:0070013 intracellular organelle lumen;	GO:0003824 catalytic activity; GO:0004553 hydrolase activity, hydrolyzing O-glycosyl compounds; GO:0016787 hydrolase activity; GO:0016798 hydrolase activity, acting on glycosyl bonds;
A0A287AL53	223	K	5.683	0.0318343	Up	Abhydrolase domain containing 10, depalmitoylase OS=Sus scrofa OX=9823 GN=ABHD10 PE=1 SV=1	ABHD10	1	5.89961e-21	201.29	5	IQYSVIK(1)EAEHHCLLHSPIPVNCPIR	1.1818	1.72253	0.779561	2.60015	0.441769	0.112988	0.343006	mitochondria	K13702	ABHD10; abhydrolase domain-containing protein 10 [EC:3.1.1.93]		GO:0005975 carbohydrate metabolic process; GO:0005996 monosaccharide metabolic process; GO:0006063 uronic acid metabolic process; GO:0006082 organic acid metabolic process; GO:0008152 metabolic process; GO:0009056 catabolic process; GO:0009987 cellular process; GO:0016052 carbohydrate catabolic process; GO:0016054 organic acid catabolic process; GO:0016137 glycoside metabolic process; GO:0016139 …	GO:0005622 intracellular; GO:0005623 cell; GO:0005737 cytoplasm; GO:0005739 mitochondrion; GO:0005759 mitochondrial matrix; GO:0005829 cytosol; GO:0031974 membrane-enclosed lumen; GO:0043226 organelle; GO:0043227 membrane-bounded organelle; GO:0043229 intracellular organelle; GO:0043231 intracellular membrane-bounded organelle; GO:0043233 organelle lumen; GO:0070013 intracellular organelle lumen;	GO:0003824 catalytic activity; GO:0004553 hydrolase activity, hydrolyzing O-glycosyl compounds; GO:0016787 hydrolase activity; GO:0016798 hydrolase activity, acting on glycosyl bonds;
A0A287AL53	248	K	21.931	0.00123741	Up	Abhydrolase domain containing 10, depalmitoylase OS=Sus scrofa OX=9823 GN=ABHD10 PE=1 SV=1	ABHD10	1	2.01843e-21	234.98	3	LLHGMK(1)DDVIPWHTSVQVADR	0.48758	1.17064	2.23593	1.44592	0.0800104	0.067496		mitochondria	K13702	ABHD10; abhydrolase domain-containing protein 10 [EC:3.1.1.93]		GO:0005975 carbohydrate metabolic process; GO:0005996 monosaccharide metabolic process; GO:0006063 uronic acid metabolic process; GO:0006082 organic acid metabolic process; GO:0008152 metabolic process; GO:0009056 catabolic process; GO:0009987 cellular process; GO:0016052 carbohydrate catabolic process; GO:0016054 organic acid catabolic process; GO:0016137 glycoside metabolic process; GO:0016139 …	GO:0005622 intracellular; GO:0005623 cell; GO:0005737 cytoplasm; GO:0005739 mitochondrion; GO:0005759 mitochondrial matrix; GO:0005829 cytosol; GO:0031974 membrane-enclosed lumen; GO:0043226 organelle; GO:0043227 membrane-bounded organelle; GO:0043229 intracellular organelle; GO:0043231 intracellular membrane-bounded organelle; GO:0043233 organelle lumen; GO:0070013 intracellular organelle lumen;	GO:0003824 catalytic activity; GO:0004553 hydrolase activity, hydrolyzing O-glycosyl compounds; GO:0016787 hydrolase activity; GO:0016798 hydrolase activity, acting on glycosyl bonds;
A0A287AL53	69	K	7.801	0.00502781	Up	Abhydrolase domain containing 10, depalmitoylase OS=Sus scrofa OX=9823 GN=ABHD10 PE=1 SV=1	ABHD10	1	2.30913e-05	126.25	3	TSVSFLSRPDLPNLAYK(1)K	0.25561	2.07287	1.29771	1.94767	0.384774	0.112165	0.184809	mitochondria	K13702	ABHD10; abhydrolase domain-containing protein 10 [EC:3.1.1.93]		GO:0005975 carbohydrate metabolic process; GO:0005996 monosaccharide metabolic process; GO:0006063 uronic acid metabolic process; GO:0006082 organic acid metabolic process; GO:0008152 metabolic process; GO:0009056 catabolic process; GO:0009987 cellular process; GO:0016052 carbohydrate catabolic process; GO:0016054 organic acid catabolic process; GO:0016137 glycoside metabolic process; GO:0016139 …	GO:0005622 intracellular; GO:0005623 cell; GO:0005737 cytoplasm; GO:0005739 mitochondrion; GO:0005759 mitochondrial matrix; GO:0005829 cytosol; GO:0031974 membrane-enclosed lumen; GO:0043226 organelle; GO:0043227 membrane-bounded organelle; GO:0043229 intracellular organelle; GO:0043231 intracellular membrane-bounded organelle; GO:0043233 organelle lumen; GO:0070013 intracellular organelle lumen;	GO:0003824 catalytic activity; GO:0004553 hydrolase activity, hydrolyzing O-glycosyl compounds; GO:0016787 hydrolase activity; GO:0016798 hydrolase activity, acting on glycosyl bonds;
A0A287AL53	267	K	8.114	0.00126463	Up	Abhydrolase domain containing 10, depalmitoylase OS=Sus scrofa OX=9823 GN=ABHD10 PE=1 SV=1	ABHD10	1	0.0013808	121.93	2	VVSK(1)DVDVILR	0.3077	1.74613	2.09848	1.49706	0.329942	0.184984	0.143408	mitochondria	K13702	ABHD10; abhydrolase domain-containing protein 10 [EC:3.1.1.93]		GO:0005975 carbohydrate metabolic process; GO:0005996 monosaccharide metabolic process; GO:0006063 uronic acid metabolic process; GO:0006082 organic acid metabolic process; GO:0008152 metabolic process; GO:0009056 catabolic process; GO:0009987 cellular process; GO:0016052 carbohydrate catabolic process; GO:0016054 organic acid catabolic process; GO:0016137 glycoside metabolic process; GO:0016139 …	GO:0005622 intracellular; GO:0005623 cell; GO:0005737 cytoplasm; GO:0005739 mitochondrion; GO:0005759 mitochondrial matrix; GO:0005829 cytosol; GO:0031974 membrane-enclosed lumen; GO:0043226 organelle; GO:0043227 membrane-bounded organelle; GO:0043229 intracellular organelle; GO:0043231 intracellular membrane-bounded organelle; GO:0043233 organelle lumen; GO:0070013 intracellular organelle lumen;	GO:0003824 catalytic activity; GO:0004553 hydrolase activity, hydrolyzing O-glycosyl compounds; GO:0016787 hydrolase activity; GO:0016798 hydrolase activity, acting on glycosyl bonds;
F1RP25	58	K	14.081	0.000649008	Up	Citramalyl-CoA lyase OS=Sus scrofa OX=9823 GN=CLYBL PE=1 SV=4	CLYBL	1	0.000163275	161.63	2	AVLYVPGNDEK(1)K	-0.30383	1.76891	1.86799	1.96524	0.213961	0.0928073	0.0910959	mitochondria	K11390	CLYBL; citrate lyase subunit beta-like protein [EC:4.1.-.-]		GO:0009987 cellular process; GO:0016043 cellular component organization; GO:0019222 regulation of metabolic process; GO:0022607 cellular component assembly; GO:0030656 regulation of vitamin metabolic process; GO:0031323 regulation of cellular metabolic process; GO:0043933 protein-containing complex subunit organization; GO:0044085 cellular component biogenesis; GO:0050789 regulation of biological…		GO:0000287 magnesium ion binding; GO:0003824 catalytic activity; GO:0004474 malate synthase activity; GO:0005488 binding; GO:0016740 transferase activity; GO:0016746 transferase activity, transferring acyl groups; GO:0016829 lyase activity; GO:0016830 carbon-carbon lyase activity; GO:0016833 oxo-acid-lyase activity; GO:0043167 ion binding; GO:0043169 cation binding; GO:0046872 metal ion binding; …
F1RP25	93	K	15.51	0.00162477	Up	Citramalyl-CoA lyase OS=Sus scrofa OX=9823 GN=CLYBL PE=1 SV=4	CLYBL	1	1.08957e-06	187.76	2	IVK(1)TLEDFDLGPTEK	0.73393	1.54992	2.37619	1.71048	0.191328	0.0568636	0.115222	mitochondria	K11390	CLYBL; citrate lyase subunit beta-like protein [EC:4.1.-.-]		GO:0009987 cellular process; GO:0016043 cellular component organization; GO:0019222 regulation of metabolic process; GO:0022607 cellular component assembly; GO:0030656 regulation of vitamin metabolic process; GO:0031323 regulation of cellular metabolic process; GO:0043933 protein-containing complex subunit organization; GO:0044085 cellular component biogenesis; GO:0050789 regulation of biological…		GO:0000287 magnesium ion binding; GO:0003824 catalytic activity; GO:0004474 malate synthase activity; GO:0005488 binding; GO:0016740 transferase activity; GO:0016746 transferase activity, transferring acyl groups; GO:0016829 lyase activity; GO:0016830 carbon-carbon lyase activity; GO:0016833 oxo-acid-lyase activity; GO:0043167 ion binding; GO:0043169 cation binding; GO:0046872 metal ion binding; …
[truncated: 1,133 more rows]
