# Supplementary material for: Cryopreservation Induces Acetylation of Metabolism-Related Proteins in Boar Sperm
Source: Int J Mol Sci. 2023 Jul 1;24(13):10983. doi: 10.3390/ijms241310983 (PMC10341673; doi:10.3390/ijms241310983)
Supplement: Supplementary file 1 [file ijms-24-10983-s001.zip › GO enrichment of differentially expressed proteins between fresh and frozen-thawed boar sperm.xlsx]

## Sheet: Up
GO Terms Level 1	GO Terms Description	GO Terms Level	GO Terms ID	Mapping	Background	All Mapping	All Background	Fold Enrichment	Fisher's exact test p value	-log10(p value)	Related proteins
Cellular Component	mitochondrion	6	GO:0005739	191	339	406	1131	1.57	2.21157e-20	19.66	A0A286ZUP1 F2Z565 A0A286ZIE8 F1SJV8 A0A286ZJ07 A0A5G2QW89 A0A5G2QU76 A0A286ZKX2 A0A287ADK3 A0A286ZLJ0 A0A286ZM06 A0A5G2QSJ2 F1SM98 I3L8T2 A0A286ZQY6 A0A286ZRC3 A0A286ZRL1 F1SHG7 A0A286ZX04 A0A5G2RC13 Q68J42 A0A286ZU97 A0A286ZUN9 A0A286ZVG1 A0A286ZVQ0 A0A287BA45 A0A286ZWQ9 A0A287BF92 P33198 A0A5G2R4S0 A0A286ZYP6 A0A5G2QFH7 A0A287A2Y4 A0A287A4T2 A0A287A4Z2 F1SKM0 Q2EHH7 F1SRQ7 A0A5G2QK91 A0A287BG49…
	mitochondrial matrix	7	GO:0005759	93	145	406	1131	1.79	1.29381e-13	12.89	F1SJV8 A0A286ZJ07 A0A286ZKX2 A0A287ADK3 A0A5G2QSJ2 A0A286ZQY6 A0A286ZRL1 F1SHG7 A0A286ZUN9 A0A286ZVQ0 A0A287BA45 P33198 A0A5G2R4S0 A0A5G2QFH7 A0A287A4T2 A0A287A4Z2 F1SRQ7 A0A287BG49 A0A287A9I8 F1S297 A0A287AA21 A0A287AAR5 A0A287AL53 A0A287AD92 F1RGJ3 A0A287AE88 A0A287AET3 A0A5G2RB79 F1RPS8 I3LLG4 A0A287ALM2 A0A287ANI6 A0A287AP21 F1RK10 F1SHD7 A0A287B6C5 A0A5G2QIN8 F1SED0 A0A287B574 A0A287B6E3 A0A…
	mitochondrial protein complex	7	GO:0098798	57	86	406	1131	1.85	3.30731e-09	8.48	A0A5G2QW89 F1SM98 A0A286ZQY6 A0A286ZUN9 A0A287BA45 A0A5G2R4S0 A0A5G2QFH7 A0A287A2Y4 A0A287A4T2 F1SKM0 A0A5G2QK91 A0A287A9I8 F1S297 A0A287AAR5 P13618 A0A287AD92 A0A287AE88 F1RPS8 A0A287AP21 F1SHD7 A0A287AS93 A0A287AZF9 A0A287B574 A0A287B6E3 A0A287B719 F1SK15 A0A287BAW0 A0A287BGN0 A0A5G2QGJ8 A0A2C9F3A3 A0A5G2QGD4 A0A5G2Q729 A0A5G2Q7D7 A0A5G2QIE6 A0A5G2QSR2 A0A5G2R0H0 A0A5G2REY8 I3LCI2 Q95339 F1RI18…
	mitochondrial membrane	8	GO:0031966	85	151	406	1131	1.57	5.05611e-08	7.3	F2Z565 A0A286ZIE8 A0A5G2QW89 A0A5G2QU76 A0A286ZLJ0 A0A286ZM06 F1SM98 I3L8T2 A0A286ZX04 A0A5G2RC13 A0A286ZUN9 A0A286ZVG1 A0A287BF92 P33198 A0A5G2R4S0 A0A287A2Y4 F1SKM0 Q2EHH7 A0A5G2QK91 A0A287BG49 A0A287A9I8 A0A287AAR5 A0A5G2QG10 P13618 A0A287AD92 A0A287AE88 A0A5G2RB79 F1RPS8 A0A287AI50 A0A287AND7 A0A287AP21 F1SHD7 A0A287AS93 A0A287AZF9 A0A287B6E3 A0A287B719 A0A287BAW0 A0A287BD08 A0A287BGN0 P00506…
	organelle inner membrane	6	GO:0019866	71	122	406	1131	1.62	1.30831e-07	6.88	F2Z565 A0A286ZIE8 A0A5G2QW89 A0A5G2QU76 A0A286ZLJ0 A0A286ZM06 F1SM98 I3L8T2 A0A286ZX04 A0A5G2RC13 A0A286ZUN9 A0A287BF92 P33198 A0A5G2R4S0 A0A287A2Y4 F1SKM0 A0A5G2QK91 A0A287A9I8 A0A287AAR5 P13618 A0A287AD92 A0A287AE88 A0A5G2RB79 F1RPS8 A0A287AI50 A0A287AND7 A0A287AP21 F1SHD7 A0A287AS93 A0A287AZF9 A0A287B6E3 A0A287B719 A0A287BAW0 A0A287BGN0 P00506 A0A5G2QGJ8 A0A2C9F3A3 A0A5G2QGD4 A0A5G2QVA7 A0A5G2…
	mitochondrial inner membrane	9	GO:0005743	71	122	406	1131	1.62	1.30831e-07	6.88	F2Z565 A0A286ZIE8 A0A5G2QW89 A0A5G2QU76 A0A286ZLJ0 A0A286ZM06 F1SM98 I3L8T2 A0A286ZX04 A0A5G2RC13 A0A286ZUN9 A0A287BF92 P33198 A0A5G2R4S0 A0A287A2Y4 F1SKM0 A0A5G2QK91 A0A287A9I8 A0A287AAR5 P13618 A0A287AD92 A0A287AE88 A0A5G2RB79 F1RPS8 A0A287AI50 A0A287AND7 A0A287AP21 F1SHD7 A0A287AS93 A0A287AZF9 A0A287B6E3 A0A287B719 A0A287BAW0 A0A287BGN0 P00506 A0A5G2QGJ8 A0A2C9F3A3 A0A5G2QGD4 A0A5G2QVA7 A0A5G2…
	motile cilium	6	GO:0031514	52	82	406	1131	1.77	1.56115e-07	6.81	A0A286ZIE6 F1SIK9 A0A286ZNM0 A0A286ZQ79 A0A287ACC3 A0A286ZWH7 F1SBB1 A0A287A2J9 A0A287A3S5 A0A287A4I2 I3LBD3 F1RMH1 A0A287B2H7 A0A287BF02 A0A5G2Q9J9 A0A5G2R4S9 A0A5G2RNC0 A0A5G2QHV4 A0A5G2QNW8 A0A5G2QQD3 F1RRW4 D3K5M3 A0A5G2R0D3 F1SUF2 F1RGN9 F1RGZ7 F1RK75 F1RK80 F1RL08 F1RM74 F1RRA6 F1RRH7 F1RRQ9 F1RZ80 I3LE84 F1S4S3 F1S605 F1SAE4 F1SC02 F1SDE8 F1SFX0 F1SP29 F1SPB5 F1SUR7 F1SV60 I3LBP3 I3LT05 I3…
	sperm flagellum	8	GO:0036126	42	62	406	1131	1.89	1.9285e-07	6.71	A0A286ZIE6 F1SIK9 A0A286ZNM0 A0A286ZQ79 A0A287ACC3 A0A286ZWH7 F1SBB1 A0A287A2J9 A0A287A3S5 A0A287A4I2 A0A287B2H7 A0A5G2Q9J9 A0A5G2R4S9 A0A5G2RNC0 A0A5G2QHV4 A0A5G2QNW8 A0A5G2QQD3 F1RRW4 D3K5M3 A0A5G2R0D3 F1SUF2 F1RGN9 F1RGZ7 F1RK75 F1RL08 F1RM74 F1RRQ9 I3LE84 F1S4S3 F1S605 F1SAE4 F1SC02 F1SDE8 F1SUR7 F1SV60 I3LBP3 I3LT05 I3LLI7 I3LN22 I3LN92 I3LTK6 Q29077
Molecular Function	oxidoreductase activity	3	GO:0016491	84	150	339	955	1.58	2.75443e-08	7.56	A0A286ZJ07 A0A287ADK3 F1SN58 A0A286ZM06 A0A5G2QSJ2 F1SM98 A0A286ZQY6 A0A287A9Z2 A0A286ZUN9 A0A287BA45 A0A286ZXF1 P33198 P50578 A0A287A4T2 A0A287A4Z2 F1SKM0 A0A287BG49 F1S297 A0A287AAR5 A0A287AE88 A0A287AET3 A0A287ALM2 A0A287BPT0 A0A287B410 F1SHD7 A0A287B6C5 A0A5G2QIN8 A0A287AZF9 F1SED0 A0A287B2H7 A0A287B6E3 A0A287BAW0 A0A287BAZ8 Q2XQV4 A0A5G2R0S9 A0A5G2QGJ8 A0A5G2RC01 A0A2C9F352 A0A5G2QGD4 A0A5G2…
	electron transfer activity	4	GO:0009055	19	29	339	955	1.85	0.00116928	2.93	A0A5G2QSJ2 F1SM98 P50578 A0A287A4T2 F1SKM0 F1SHD7 A0A287AZF9 F1SED0 A0A287B6E3 Q2XQV4 A0A5G2Q7D7 A0A5G2R0H0 A0A5G2QZN1 A0A5G2R0M9 F1RNZ1 F1S031 I3LER5 I3LNB4 Q1G1K7
	flavin adenine dinucleotide binding	6	GO:0050660	11	14	339	955	2.21	0.00117224	2.93	A0A287A4T2 A0A287BG49 A0A287AET3 A0A287B6C5 A0A287B6E3 A0A5G2RC01 A0A5G2QCB4 A0A5G2QUP3 A0A5G2QPK6 F1ST43 P79274
	fatty acid derivative binding	3	GO:1901567	9	11	339	955	2.3	0.00216513	2.66	A0A286ZPN4 A0A287BG49 A0A287ANI6 A0A5G2QGJ8 A0A5G2RC01 F1ST43 A0A5G2RA17 P79274 Q29554
	transferase activity, transferring acyl groups	4	GO:0016746	12	17	339	955	1.99	0.0037332	2.43	A0A286ZKX2 A0A286ZRC3 F1RP25 A0A5G2QGJ8 A0A5G2QGS5 A0A5G2QIE6 A0A5S6FV10 A0A5G2R8A9 F6PZX4 F1RS43 F1S0N2 Q29554
	fatty-acyl-CoA binding	9	GO:0000062	8	10	339	955	2.25	0.0051188	2.29	A0A287BG49 A0A287ANI6 A0A5G2QGJ8 A0A5G2RC01 F1ST43 A0A5G2RA17 P79274 Q29554
	thiolester hydrolase activity	5	GO:0016790	8	10	339	955	2.25	0.0051188	2.29	A0A286ZVQ0 A0A287AJ16 A0A5G2QZL7 A0A287B9G2 A0A480V3W7 A0A5G2RA17 A0A5G2RCG0 F1RUE0
	MHC class I protein binding	6	GO:0042288	5	5	339	955	2.82	0.00552928	2.26	P03974 A0A5G2QGK1 F1RPS8 F1SLA0 F6QA08
Biological Process	carboxylic acid catabolic process	7	GO:0046395	43	62	386	1075	1.93	3.9349e-08	7.41	A0A287ADK3 A0A286ZRC3 Q68J42 A0A286ZVQ0 P50578 A0A287A4T2 A0A287BG49 A0A287AA21 A0A287AL53 A0A287AET3 A0A287AFJ1 A0A287AJ16 A0A287ANI6 A0A287BPT0 F1RPW8 A0A5G2QIN8 F1SED0 A0A287B6E3 F1SK15 A0A287B9G2 A0A287BAZ8 P00506 A0A5G2R0S9 A0A5G2QGJ8 A0A5G2RC01 A0A5G2QGS5 A0A5G2QR28 A0A5G2QSR2 A0A5G2R0H0 A0A5G2QZN1 F1ST43 A0A5G2R3R8 A0A5G2R8A9 A0A5G2RA17 A0A5K1UWY1 A0A5S6HDE4 F6PZX4 F1RFB8 F1RWZ4 F1SA26 I3L…
	cellular respiration	6	GO:0045333	47	71	386	1075	1.84	1.22266e-07	6.91	A0A5G2QU76 A0A5G2QSJ2 F1SM98 I3L8T2 A0A286ZQY6 A0A286ZUN9 A0A287BA45 P33198 F1RGP1 A0A287A4Z2 F1SKM0 F1S297 A0A287AAR5 A0A287AE88 A0A287ALM2 F1RK10 A0A287B410 F1SHD7 A0A5G2QIN8 A0A287AZF9 A0A287B574 A0A287B6E3 A0A287BAW0 A0A287BGN0 A0A5G2QGD4 A0A5G2Q7D7 A0A5G2QPK6 A0A5G2R718 F1STS4 A0A5G2REY8 P00346 I3LCI2 A0A5S8M9X9 F1RI18 F1RVN1 F1S031 F1SIS9 F1SLR1 F1SQP4 P16276 F1SRC5 F1SV23 I3LDC1 I3LER5 K7G…
	ribose phosphate metabolic process	6	GO:0019693	71	128	386	1075	1.54	1.85693e-06	5.73	A0A5G2QU76 A0A286ZPN4 F1SM98 I3L8T2 A0A286ZQ79 A0A286ZX04 P03974 A0A5G2RC13 A0A286ZUN9 A0A286ZVQ0 A0A287BA45 A0A5G2R4S0 A0A286ZYX8 A0A287A2Y4 F1SKM0 A0A5G2QK91 A0A287A9I8 A0A287AAR5 P13618 A0A287AE88 F1RPS8 A0A287AJ16 A0A287ANI6 F1RK10 A0A287B410 F1SHD7 A0A287AZF9 A0A287AZQ6 F1SED0 A0A287B2H7 A0A287B574 A0A287BGN0 A0A288CFT0 A0A2C9F3A3 A0A5G2QGD4 A0A480V3W7 A0A5G2Q7D7 A0A5G2QGS5 A0A5G2QIE6 A0A5S6…
	lipid oxidation	7	GO:0034440	21	26	386	1075	2.25	2.82235e-06	5.55	A0A286ZRC3 A0A287A4T2 A0A287BG49 A0A287AA21 A0A287AET3 A0A287AJ16 F1SED0 A0A287B6E3 A0A5G2R0S9 A0A5G2QGJ8 A0A5G2RC01 A0A5G2QGS5 A0A5G2R0H0 F1ST43 A0A5G2R8A9 A0A5S6HDE4 F6PZX4 D2D0E6 F1RWZ4 P79274 Q29554
	oxidative phosphorylation	7	GO:0006119	34	52	386	1075	1.82	1.08495e-05	4.96	F1SM98 A0A5G2RC13 A0A286ZUN9 A0A5G2R4S0 A0A287A2Y4 F1SKM0 A0A5G2QK91 A0A287A9I8 A0A287AAR5 P13618 A0A287AE88 F1RPS8 F1SHD7 A0A287AZF9 A0A287BGN0 A0A2C9F3A3 A0A5G2QGD4 A0A5G2Q7D7 A0A5G2QPK6 A0A5G2REY8 Q95339 F1RI18 F1RVN1 F1S031 F1SIS9 F1SLA0 F1SLR1 F1SQP4 F1SV23 I3LER5 K7GR43 K7GS22 Q35914 Q5S3G4
	tricarboxylic acid metabolic process	7	GO:0072350	21	27	386	1075	2.17	1.35507e-05	4.87	A0A5G2QSJ2 A0A286ZQY6 A0A287BA45 P33198 F1S297 A0A287ALM2 F1RK10 A0A287B410 A0A287B574 A0A5G2Q7D7 A0A5G2R718 A0A5G2R3R8 F1STS4 P00346 I3LCI2 A0A5S8M9X9 F1S0N2 P16276 F1SRC5 I3LDC1 Q1G1K7
	aerobic respiration	7	GO:0009060	24	33	386	1075	2.03	2.01692e-05	4.7	A0A5G2QSJ2 A0A286ZQY6 A0A287BA45 P33198 F1SKM0 F1S297 A0A287ALM2 F1RK10 A0A287B410 A0A287B574 A0A287BGN0 A0A5G2Q7D7 A0A5G2R718 F1STS4 A0A5G2REY8 P00346 I3LCI2 A0A5S8M9X9 P16276 F1SRC5 I3LDC1 I3LER5 Q1G1K7 Q5S3G4
	monocarboxylic acid metabolic process	7	GO:0032787	53	97	386	1075	1.52	8.88854e-05	4.05	A0A5G2QSJ2 A0A286ZRC3 Q68J42 A0A286ZVQ0 A0A286ZYX8 P50578 A0A287A4T2 A0A287BG49 A0A287AA21 A0A287AAR5 A0A287AL53 A0A287AET3 A0A287AJ16 F1RPW8 A0A5G2QIN8 A0A287B2E3 F1SED0 A0A287B2H7 A0A287B6E3 F1SK15 A0A5G2R0S9 A0A5G2QGJ8 A0A288CFT0 A0A5G2RC01 A0A5G2QGS5 A0A5G2QIE6 A0A5G2QL25 A0A5G2QPK6 A0A5G2QSG9 A0A5G2R718 A0A5G2R0H0 F1ST43 A0A5G2R8A9 F1SUF2 F1STS4 F1RPU8 I3LCI2 A0A5S6HDE4 F6PZX4 D2D0E6 F1RM74 …
	mitochondrion organization	6	GO:0007005	48	87	386	1075	1.54	0.000161817	3.79	F2Z565 A0A286ZIE8 F1SM98 F1SHG7 A0A286ZX04 A0A5G2RC13 A0A286ZUN9 A0A5G2R4S0 A0A287A2Y4 A0A287A4Z2 F1SRQ7 A0A5G2QK91 A0A287A9I8 A0A287AAR5 P13618 A0A287AD92 A0A287AE88 A0A5G2RB79 F1RPS8 I3LLG4 A0A287ANI6 A0A287AP21 F1SHD7 A0A287AS93 A0A287BAW0 A0A2C9F3A3 A0A5G2QGD4 A0A5G2Q729 A0A5G2R4S9 A0A5G2QSR2 A0A5G2R1I5 A0A5G2REY8 Q95339 F6PZX4 F1RVN1 F1RWZ8 F1S031 F1SIS9 F1SLA0 F1SLR1 F1SV23 I3LMX3 I3LUR5 K7…
	ribose phosphate biosynthetic process	7	GO:0046390	37	64	386	1075	1.61	0.000249549	3.6	A0A5G2QU76 I3L8T2 A0A286ZQ79 A0A286ZX04 A0A5G2RC13 A0A5G2R4S0 A0A286ZYX8 A0A287A2Y4 A0A5G2QK91 A0A287A9I8 P13618 F1RPS8 A0A287AJ16 A0A287AZF9 A0A287AZQ6 A0A287B2H7 A0A288CFT0 A0A2C9F3A3 A0A5G2QGS5 A0A5G2QIE6 A0A5G2QPK6 A0A5G2QSG9 A0A5G2R718 F1SUF2 F1RPU8 I3LCI2 Q95339 D2D0E6 F1RM74 F1S0N2 F1S4S3 F1SFX0 F1SLA0 K7GS22 Q1KYT0 Q35914 Q5S3G4
	single fertilization	7	GO:0007338	24	37	386	1075	1.81	0.000345733	3.46	A0A286ZWH7 I3LHA2 A0A5G2QZ76 A0A287AMZ2 F1RFQ6 A0A287B423 A0A287BMD8 A0A5G2QC85 A0A5G2QE15 A0A5G2QMG1 A0A5G2QN54 A0A5G2QVS4 F1SMN3 A0A5G2RK05 D3K5M3 D0G0C9 F1SE42 F1RJL7 F1RKX1 F1RRQ9 F1S2F6 F1SP87 I3LCA2 I3LT05
	respiratory electron transport chain	7	GO:0022904	29	48	386	1075	1.68	0.000555936	3.25	A0A5G2QU76 F1SM98 I3L8T2 A0A286ZUN9 F1RGP1 A0A287A4Z2 F1SKM0 A0A287AAR5 A0A287AE88 F1SHD7 A0A5G2QIN8 A0A287AZF9 A0A287B6E3 A0A287BAW0 A0A287BGN0 A0A5G2QGD4 A0A5G2Q7D7 A0A5G2QPK6 F1RI18 F1RVN1 F1S031 F1SIS9 F1SLR1 F1SQP4 F1SV23 I3LDC1 I3LER5 K7GR43 Q5S3G4
	mitochondrial transmembrane transport	6	GO:1990542	21	32	386	1075	1.83	0.000597413	3.22	A0A5G2QW89 A0A5G2QU76 I3L8T2 A0A5G2RC13 A0A5G2R4S0 A0A287A2Y4 A0A5G2QK91 A0A287A9I8 P13618 A0A287AD92 F1RPS8 A0A287AZF9 A0A2C9F3A3 A0A5G2Q729 A0A5G2R8A9 F1RPU8 Q95339 F1SLA0 K7GS22 Q35914 Q5S3G4
	lipid modification	6	GO:0030258	21	32	386	1075	1.83	0.000597413	3.22	A0A286ZRC3 A0A287A4T2 A0A287BG49 A0A287AA21 A0A287AET3 A0A287AJ16 F1SED0 A0A287B6E3 A0A5G2R0S9 A0A5G2QGJ8 A0A5G2RC01 A0A5G2QGS5 A0A5G2R0H0 F1ST43 A0A5G2R8A9 A0A5S6HDE4 F6PZX4 D2D0E6 F1RWZ4 P79274 Q29554

## Sheet: Up GO2Protein
GO Terms Level 1	GO Terms ID	GO Terms Level	GO Terms Description	Fold Enrichment	Fisher's exact test p value	Protein accession	Position	Amino acid	Fts/Fs Ratio	Fts/Fs P value	Regulated Type	Protein description	Gene name	Localization probability	PEP	Score	Charge	Modified sequence	Mass error [ppm]	Fts_1	Fts_2	Fts_3	Fs_1	Fs_2	Fs_3
Biological Process	GO:0009144	9	purine nucleoside triphosphate metabolic process	1.67	2.92956e-06	A0A5G2Q7D7	600	K	11.974	0.00277925	Up	Succinate dehydrogenase [ubiquinone] flavoprotein subunit, mitochondrial OS=Sus scrofa OX=9823 GN=SDHA PE=1 SV=1	SDHA	1	1.26078e-07	183	3	VDEYDYSKPIQGQQK(1)K	0.4439	1.06576	1.86587	1.80467	0.155521	0.108175
Biological Process	GO:0044703	4	multi-organism reproductive process	1.33	0.0022856	A0A286ZWH7	143	K	22.885	0.00339062	Up	A-kinase anchoring protein 4 OS=Sus scrofa OX=9823 GN=AKAP4 PE=3 SV=2	AKAP4	1	3.89589e-69	351.03	2	YALGFQHALSPSASSCK(1)HK	0.03494	1.4111	1.80191	1.64546		0.0383301	0.103206
Biological Process	GO:0044703	4	multi-organism reproductive process	1.33	0.0022856	A0A287BF92	236	K	11.889	0.0300394	Up	Phospholipase A2 group VI OS=Sus scrofa OX=9823 GN=PLA2G6 PE=4 SV=2	PLA2G6	1	0.000130946	113.47	3	YGASPLHWAK(1)NAEMAR	0.060125	0.922931	0.728278	3.0833	0.147061		0.118426
Biological Process	GO:0044703	4	multi-organism reproductive process	1.33	0.0022856	F1SBB1	15	K	7.95	0.0109625	Up	Calcium binding tyrosine phosphorylation regulated OS=Sus scrofa OX=9823 GN=CABYR PE=1 SV=3	CABYR	1	3.11396e-05	138.89	2	LVIPYGLK(1)TLLEGVSR	0.48115	1.20776	0.832072	3.28982	0.180939	0.22065	0.268767
Biological Process	GO:0044703	4	multi-organism reproductive process	1.33	0.0022856	F1SBB1	98	K	4.451	0.000963192	Up	Calcium binding tyrosine phosphorylation regulated OS=Sus scrofa OX=9823 GN=CABYR PE=1 SV=3	CABYR	1	1.92403e-09	238.32	2	TPVVSQEPK(1)R	0.78669	1.41827	1.419	2.06203	0.341942	0.453563	0.305197
Biological Process	GO:0044703	4	multi-organism reproductive process	1.33	0.0022856	A0A287A3S5	419	K	12.806	0.0108239	Up	Tektin OS=Sus scrofa OX=9823 GN=TEKT4 PE=3 SV=1	TEKT4	1	1.51407e-13	244.01	2	DLAVK(1)TNSLFINR	0.09173	1.44813	0.916578	2.38787	0.166523	0.0808966
Biological Process	GO:0044703	4	multi-organism reproductive process	1.33	0.0022856	A0A287A3S5	218	K	9.461	0.00358398	Up	Tektin OS=Sus scrofa OX=9823 GN=TEKT4 PE=3 SV=1	TEKT4	1	4.44431e-46	282.6	3	ETCEMGWSDK(1)VEAYNIDEACCR	-1.1944	1.23857	1.19597	2.23634	0.158491		0.170628
Biological Process	GO:0044703	4	multi-organism reproductive process	1.33	0.0022856	A0A287A3S5	317	K	13.716	0.00143311	Up	Tektin OS=Sus scrofa OX=9823 GN=TEKT4 PE=3 SV=1	TEKT4	1	0.000430341	164.71	2	HK(1)LEYHLR	-1.5191	1.39365	1.46817	2.73045	0.206355	0.115789	0.0855747
Biological Process	GO:0044703	4	multi-organism reproductive process	1.33	0.0022856	A0A287A3S5	191	K	6.292	0.000312484	Up	Tektin OS=Sus scrofa OX=9823 GN=TEKT4 PE=3 SV=1	TEKT4	1	0.00256796	138.54	2	NIQELLK(1)R	0.21348	1.69283	1.60921	1.87512	0.363587	0.225203	0.234053
Biological Process	GO:0044703	4	multi-organism reproductive process	1.33	0.0022856	A0A287A3S5	114	K	23.948	0.00108972	Up	Tektin OS=Sus scrofa OX=9823 GN=TEKT4 PE=3 SV=1	TEKT4	1	7.33063e-68	336.37	2	VGEHLQDTHCWK(1)SELQR	-0.44875	1.65227	1.18144	2.92579	0.119775	0.0472285	0.073495
Biological Process	GO:0044703	4	multi-organism reproductive process	1.33	0.0022856	A0A286ZWH7	508	K	8.899	0.00288638	Up	A-kinase anchoring protein 4 OS=Sus scrofa OX=9823 GN=AKAP4 PE=3 SV=2	AKAP4	1	1.24709e-11	234.04	3	VGEHILK(1)ESLTMWNQK	-0.48529	1.29837	1.49654	2.59896	0.136651	0.151059	0.318427
Biological Process	GO:0044703	4	multi-organism reproductive process	1.33	0.0022856	A0A287A4I2	128	K	5.34	0.00205054	Up	Radial spoke head component 1 OS=Sus scrofa OX=9823 GN=RSPH1 PE=4 SV=2	RSPH1	1	0.000161275	146.79	2	FLNK(1)NPVGPGK	0.52202	1.4233	1.6029	2.02743	0.460834	0.256954	0.228574
Biological Process	GO:0044703	4	multi-organism reproductive process	1.33	0.0022856	A0A287A4I2	38	K	10.558	0.0037319	Up	Radial spoke head component 1 OS=Sus scrofa OX=9823 GN=RSPH1 PE=4 SV=2	RSPH1	1	4.43029e-39	311.71	3	K(1)HGQGTFIYPDGSR	0.39587	1.59499	1.043	2.84287	0.26844	0.127124	0.123578
Biological Process	GO:0044703	4	multi-organism reproductive process	1.33	0.0022856	A0A287A4I2	35	K	12.396	0.00411583	Up	Radial spoke head component 1 OS=Sus scrofa OX=9823 GN=RSPH1 PE=4 SV=2	RSPH1	1	0.00054582	143.12	2	YIGEYVK(1)NK	0.10335	1.30571	1.32682	2.91957	0.259379	0.103955	0.0845625
Biological Process	GO:0044703	4	multi-organism reproductive process	1.33	0.0022856	A0A287A4I2	105	K	3.477	0.00839303	Up	Radial spoke head component 1 OS=Sus scrofa OX=9823 GN=RSPH1 PE=4 SV=2	RSPH1	1	7.67174e-32	264.92	3	YVGTWVK(1)GQQEGAAELIHLNHR	0.22136	1.50107	1.11414	2.04448	0.590065	0.44394	0.306301
Biological Process	GO:0044703	4	multi-organism reproductive process	1.33	0.0022856	I3LHA2	1570	K	38.315	0.00392906	Up	[Histone H3]-lysine(4) N-trimethyltransferase OS=Sus scrofa OX=9823 GN=KMT2C PE=4 SV=2	KMT2C	1	0.00955118	87.719	2	SK(1)QQAK(1)IEATQK(1)LEQVK	3.6087	1.96571	1.02763	2.85405	0.0923829	0.0469381	0.0132925
Biological Process	GO:0044703	4	multi-organism reproductive process	1.33	0.0022856	I3LHA2	1574	K	38.315	0.00392906	Up	[Histone H3]-lysine(4) N-trimethyltransferase OS=Sus scrofa OX=9823 GN=KMT2C PE=4 SV=2	KMT2C	1	0.00955118	87.719	2	SK(1)QQAK(1)IEATQK(1)LEQVK	3.6087	1.96571	1.02763	2.85405	0.0923829	0.0469381	0.0132925
Biological Process	GO:0044703	4	multi-organism reproductive process	1.33	0.0022856	I3LHA2	1580	K	38.315	0.00392906	Up	[Histone H3]-lysine(4) N-trimethyltransferase OS=Sus scrofa OX=9823 GN=KMT2C PE=4 SV=2	KMT2C	1	0.00955118	87.719	2	SK(1)QQAK(1)IEATQK(1)LEQVK	3.6087	1.96571	1.02763	2.85405	0.0923829	0.0469381	0.0132925
Biological Process	GO:0044703	4	multi-organism reproductive process	1.33	0.0022856	A0A5G2QZ76	205	K	11.366	1.81476e-05	Up	Testis expressed 101 OS=Sus scrofa OX=9823 GN=TEX101 PE=1 SV=1	TEX101	1	0.000249065	139.38	3	ETCPFK(1)SLTPR	-1.0298	1.70216	1.79859	2.01405	0.181249	0.134931	0.169008
Biological Process	GO:0044703	4	multi-organism reproductive process	1.33	0.0022856	A0A287B0P6	41	K	5.081	0.000674307	Up	Calreticulin OS=Sus scrofa OX=9823 GN=CALR PE=1 SV=1	CALR	0.993084	0.0150434	65.563	3	WIESK(0.993)HK(0.007)PDFGR	1.1768	1.38967	1.61244	2.01127	0.417015	0.303237	0.266366
Biological Process	GO:0044703	4	multi-organism reproductive process	1.33	0.0022856	A0A287AKY1	366	K	13.984	0.00392011	Up	cAMP-dependent protein kinase type I-alpha regulatory subunit OS=Sus scrofa OX=9823 GN=PRKAR1A PE=3 SV=1	PRKAR1A	1	0.000170996	139.96	2	VLGPCSDILK(1)R	-0.28903	1.92824	1.39351	2.27782	0.258562	0.0841795	0.0576848
Biological Process	GO:0044703	4	multi-organism reproductive process	1.33	0.0022856	A0A287A4I2	135	K	6.629	0.00206297	Up	Radial spoke head component 1 OS=Sus scrofa OX=9823 GN=RSPH1 PE=4 SV=2	RSPH1	1	7.45686e-21	222.06	3	NPVGPGK(1)YVFDIGCEQHGEYR	-0.43577	1.85322	1.26773	2.09254	0.38313	0.222722	0.180661
Biological Process	GO:0044703	4	multi-organism reproductive process	1.33	0.0022856	A0A286ZWH7	365	K	7.696	0.00903594	Up	A-kinase anchoring protein 4 OS=Sus scrofa OX=9823 GN=AKAP4 PE=3 SV=2	AKAP4	1	2.27248e-06	146.79	3	VHSSGK(1)PIPACMVLK(1)R	0.82975	1.39864	0.979601	2.93179	0.142211	0.187541	0.360218
Biological Process	GO:0044703	4	multi-organism reproductive process	1.33	0.0022856	A0A286ZWH7	379	K	19.577	0.000162516	Up	A-kinase anchoring protein 4 OS=Sus scrofa OX=9823 GN=AKAP4 PE=3 SV=2	AKAP4	1	1.42086e-11	187.06	2	VLLK(1)HTK	0.18847	1.85556	1.34935	2.50351	0.118482	0.0781199	0.0949862
Biological Process	GO:0044703	4	multi-organism reproductive process	1.33	0.0022856	A0A286ZWH7	98	K	36.44	0.000778339	Up	A-kinase anchoring protein 4 OS=Sus scrofa OX=9823 GN=AKAP4 PE=3 SV=2	AKAP4	1	5.70431e-39	311.76	2	QDQSK(1)TEGSVCLFK	-1.0167	1.56904	1.30211	2.96859	0.0768466	0.0274697	0.0559411
Biological Process	GO:0044703	4	multi-organism reproductive process	1.33	0.0022856	Q68J42	360	K	3.256	0.0248942	Up	Hormone-sensitive lipase OS=Sus scrofa OX=9823 GN=LIPE PE=2 SV=1	LIPE	1	0.000346868	83.362	4	SLVVHIHGGGFVAQTSK(1)SHEPYLK	0.99649	1.66335	0.790486	2.13638	0.540369	0.492024	0.377382
Biological Process	GO:0044703	4	multi-organism reproductive process	1.33	0.0022856	A0A286ZWH7	749	K	7.019	0.0151072	Up	A-kinase anchoring protein 4 OS=Sus scrofa OX=9823 GN=AKAP4 PE=3 SV=2	AKAP4	1	3.90465e-13	164.31	3	AALAELEEQAALANNANYQVSGPK(1)R	-0.54825	2.13901	1.36217			0.269417	0.229403
Biological Process	GO:0044703	4	multi-organism reproductive process	1.33	0.0022856	A0A286ZWH7	606	K	21.925	0.0434356	Up	A-kinase anchoring protein 4 OS=Sus scrofa OX=9823 GN=AKAP4 PE=3 SV=2	AKAP4	1	9.65813e-105	389.16	3	ALSMK(1)HLESHGAPGPSTSLK	4.1908	1.12014	1.46786	3.15027	0.137801	0.00263279	0.121287
Biological Process	GO:0044703	4	multi-organism reproductive process	1.33	0.0022856	A0A286ZWH7	467	K	21.326	0.000453244	Up	A-kinase anchoring protein 4 OS=Sus scrofa OX=9823 GN=AKAP4 PE=3 SV=2	AKAP4	1	7.04375e-28	283.82	2	CK(1)NQSLEFSAMK	2.1551	1.31075	1.43999	2.98051	0.0752059	0.0830729	0.110466
Biological Process	GO:0044703	4	multi-organism reproductive process	1.33	0.0022856	A0A286ZWH7	414	K	5.987	0.000980642	Up	A-kinase anchoring protein 4 OS=Sus scrofa OX=9823 GN=AKAP4 PE=3 SV=2	AKAP4	1	5.44117e-188	454.08	3	NLHNITGVLMTDSDFVSAVK(1)R	2.3588	1.51825	1.33032	2.29268	0.36076	0.251898	0.246095
Biological Process	GO:0044703	4	multi-organism reproductive process	1.33	0.0022856	A0A286ZWH7	570	K	28.264	9.55936e-05	Up	A-kinase anchoring protein 4 OS=Sus scrofa OX=9823 GN=AKAP4 PE=3 SV=2	AKAP4	1	9.89017e-149	416.41	3	GK(1)DAFEDDCPGSTMGYMTQSAQYEK	-0.41998	1.94307	1.56313	2.28877	0.0857405	0.0464784	0.0728103
Biological Process	GO:0044703	4	multi-organism reproductive process	1.33	0.0022856	A0A286ZWH7	31	K	22.752	0.000475261	Up	A-kinase anchoring protein 4 OS=Sus scrofa OX=9823 GN=AKAP4 PE=3 SV=2	AKAP4	1	6.08477e-27	277.31	3	GMCK(1)VDLYSPTGQQDQDRK	-0.46962	1.97625	1.12877	2.64237	0.112583	0.072063	0.0679667
Biological Process	GO:0044703	4	multi-organism reproductive process	1.33	0.0022856	A0A286ZWH7	145	K	16.075	0.00132114	Up	A-kinase anchoring protein 4 OS=Sus scrofa OX=9823 GN=AKAP4 PE=3 SV=2	AKAP4	1	6.64786e-77	293.19	4	HK(1)VGDTEGECHQLHSGNCYSVYADQLNMDYMANGPQNLR	3.0286	1.4825	1.99628	2.16982	0.199774	0.0632776	0.0883477
Biological Process	GO:0044703	4	multi-organism reproductive process	1.33	0.0022856	A0A286ZWH7	382	K	10.915	0.000796362	Up	A-kinase anchoring protein 4 OS=Sus scrofa OX=9823 GN=AKAP4 PE=3 SV=2	AKAP4	1	1.36379e-115	408.57	2	HTK(1)EIVSDLIDSCMK	-0.018161	1.3453	1.36054	2.79059	0.186585	0.141425	0.175556
Biological Process	GO:0044703	4	multi-organism reproductive process	1.33	0.0022856	A0A286ZWH7	305	K	8.608	0.000287665	Up	A-kinase anchoring protein 4 OS=Sus scrofa OX=9823 GN=AKAP4 PE=3 SV=2	AKAP4	1	2.0346e-05	210.27	2	K(1)TFLYSELSNK(1)NK	1.3031	1.30317	1.67907	2.39329	0.217493	0.196941	0.210035
Biological Process	GO:0044703	4	multi-organism reproductive process	1.33	0.0022856	A0A286ZWH7	315	K	9.983	0.00278046	Up	A-kinase anchoring protein 4 OS=Sus scrofa OX=9823 GN=AKAP4 PE=3 SV=2	AKAP4	1	2.74215e-13	246.41	2	TFLYSELSNK(1)NK	0.94352	1.34005	1.3053	2.80835	0.262736	0.113524	0.17004
Biological Process	GO:0044703	4	multi-organism reproductive process	1.33	0.0022856	A0A286ZWH7	720	K	11.118	0.00184411	Up	A-kinase anchoring protein 4 OS=Sus scrofa OX=9823 GN=AKAP4 PE=3 SV=2	AKAP4	1	2.16906e-13	249.03	2	LCLIMAK(1)YSNNR	0.1232	1.84186	1.35942	1.51587	0.104054		0.178791
Biological Process	GO:0044703	4	multi-organism reproductive process	1.33	0.0022856	A0A286ZWH7	251	K	2.753	0.00153908	Up	A-kinase anchoring protein 4 OS=Sus scrofa OX=9823 GN=AKAP4 PE=3 SV=2	AKAP4	1	3.5157e-07	130	3	LEGGSK(1)CLHHSIYPPSGDK	2.4963	1.14511	1.47079	1.78552	0.516422	0.535683	0.546479
Biological Process	GO:0044703	4	multi-organism reproductive process	1.33	0.0022856	A0A286ZWH7	189	K	12.126	0.00793092	Up	A-kinase anchoring protein 4 OS=Sus scrofa OX=9823 GN=AKAP4 PE=3 SV=2	AKAP4	1	2.45295e-05	113.63	3	LEMTASK(1)NTNNNQSPSTPPAK	-0.073316	1.42267	1.24291	2.07385	0.0724343		0.188138
Biological Process	GO:0044703	4	multi-organism reproductive process	1.33	0.0022856	A0A286ZWH7	661	K	61.324	0.000144923	Up	A-kinase anchoring protein 4 OS=Sus scrofa OX=9823 GN=AKAP4 PE=3 SV=2	AKAP4	1	8.47928e-184	453.47	3	LLGESPFHCEDLCEGENK(1)R	0.35807	1.15329	1.8429	2.90755	0.0390561	0.0278876	0.0293276
Biological Process	GO:0044703	4	multi-organism reproductive process	1.33	0.0022856	A0A286ZWH7	444	K	14.769	3.26689e-05	Up	A-kinase anchoring protein 4 OS=Sus scrofa OX=9823 GN=AKAP4 PE=3 SV=2	AKAP4	1	1.83518e-05	207.29	3	LVSALLGEK(1)R	-0.32893	1.62458	1.70227	2.29266	0.144376	0.112371	0.123736
Biological Process	GO:0044703	4	multi-organism reproductive process	1.33	0.0022856	A0A286ZWH7	527	K	12.12	0.0178974	Up	A-kinase anchoring protein 4 OS=Sus scrofa OX=9823 GN=AKAP4 PE=3 SV=2	AKAP4	1	0.000104946	143.03	2	MASK(1)PCISNK	0.64829	1.2612		2.43393		0.14622	0.15865
Biological Process	GO:0044703	4	multi-organism reproductive process	1.33	0.0022856	A0A286ZWH7	533	K	154.429	0.00200602	Up	A-kinase anchoring protein 4 OS=Sus scrofa OX=9823 GN=AKAP4 PE=3 SV=2	AKAP4	1	2.72774e-06	212.39	2	PCISNK(1)EEK	-0.89916	1.25448	0.842468	2.88156	0.0090902		0.0124019
Biological Process	GO:0044703	4	multi-organism reproductive process	1.33	0.0022856	A0A286ZWH7	489	K	26.717	0.00150584	Up	A-kinase anchoring protein 4 OS=Sus scrofa OX=9823 GN=AKAP4 PE=3 SV=2	AKAP4	1	4.31139e-06	215.34	2	MK(1)PEECK(1)PLTSAEK	-1.0084	1.52955	0.883659	3.37031	0.0650811	0.0609341	0.0904571
Biological Process	GO:0044703	4	multi-organism reproductive process	1.33	0.0022856	A0A286ZWH7	434	K	3.304	0.00635604	Up	A-kinase anchoring protein 4 OS=Sus scrofa OX=9823 GN=AKAP4 PE=3 SV=2	AKAP4	1	3.1256e-20	267.57	2	QNAADIMEAMLK(1)R	-0.041413	1.59191	1.47868			0.423629	0.505779
Biological Process	GO:0044703	4	multi-organism reproductive process	1.33	0.0022856	A0A286ZWH7	374	K	8.493	0.00571529	Up	A-kinase anchoring protein 4 OS=Sus scrofa OX=9823 GN=AKAP4 PE=3 SV=2	AKAP4	1	3.31554e-30	291.57	3	VHSSGK(1)PIPACMVLK(1)R	0.82975	1.14327	1.08706	3.13765	0.172836	0.180637	0.278544
Biological Process	GO:0044703	4	multi-organism reproductive process	1.33	0.0022856	A0A287AMZ2	370	K	3.812	0.00299412	Up	T-complex protein 1 subunit gamma OS=Sus scrofa OX=9823 GN=CCT3 PE=1 SV=1	CCT3	1	0.000104946	143.03	2	DPK(1)ACTILLR	-1.0475	1.51827	1.294	1.94094	0.545615	0.402771	0.298404
Biological Process	GO:0044703	4	multi-organism reproductive process	1.33	0.0022856	Q68J42	161	K	2.321	0.018541	Up	Hormone-sensitive lipase OS=Sus scrofa OX=9823 GN=LIPE PE=2 SV=1	LIPE	1	6.32553e-06	208.63	2	EYVTLHK(1)GCFYGR	0.29565	1.42774	1.17911	1.58643	0.838196	0.402031	0.566489
Biological Process	GO:0044703	4	multi-organism reproductive process	1.33	0.0022856	A0A287AMZ2	78	K	1.959	0.0267903	Up	T-complex protein 1 subunit gamma OS=Sus scrofa OX=9823 GN=CCT3 PE=1 SV=1	CCT3	1	1.74998e-33	281.07	2	EIQVQHPAAK(1)SMIEISR	-0.21739	1.34264	1.24855	1.38106	0.942289	0.461669	0.623799
Biological Process	GO:0044703	4	multi-organism reproductive process	1.33	0.0022856	A0A287AMZ2	248	K	2.681	0.00445418	Up	T-complex protein 1 subunit gamma OS=Sus scrofa OX=9823 GN=CCT3 PE=1 SV=1	CCT3	1	4.58239e-05	145.34	2	IVLLDSSLEYK(1)K	-1.2557	1.46646	1.09054	1.44726		0.509769	0.485978
Biological Process	GO:0044703	4	multi-organism reproductive process	1.33	0.0022856	A0A5G2QE15	69	K	3.359	0.0367671	Up	Zona pellucida-binding protein 1 OS=Sus scrofa OX=9823 GN=ZPBP PE=3 SV=1	ZPBP	1	1.76238e-13	219.01	4	VYVMLHQK(1)SPHVLCVTQR	-0.073309	0.761124	1.33627	2.52613	0.531475	0.449453	0.395551
Biological Process	GO:0044703	4	multi-organism reproductive process	1.33	0.0022856	A0A5G2QE15	142	K	9.701	0.0136603	Up	Zona pellucida-binding protein 1 OS=Sus scrofa OX=9823 GN=ZPBP PE=3 SV=1	ZPBP	1	5.77901e-95	383.43	3	PTVEEVVK(1)NLQLK	-0.14956	1.10704	1.24123	3.09106	0.344829	0.14542	0.0704291
Biological Process	GO:0044703	4	multi-organism reproductive process	1.33	0.0022856	A0A5G2QE15	181	K	7.559	0.00827177	Up	Zona pellucida-binding protein 1 OS=Sus scrofa OX=9823 GN=ZPBP PE=3 SV=1	ZPBP	1	9.73512e-100	379.4	3	YHAAPCNSIYNISFEK(1)K	0.097152	1.51895	1.20442	2.5756	0.423639	0.145895	0.131506
Biological Process	GO:0044703	4	multi-organism reproductive process	1.33	0.0022856	A0A5G2QGV5	12	K	3.609	0.0286364	Up	Thioredoxin domain-containing protein OS=Sus scrofa OX=9823 GN=TXNDC8 PE=4 SV=1	TXNDC8	1	1.59005e-08	230.56	2	DMDELK(1)TFLR	-0.16907	1.40179	1.27511	2.02137	0.816298	0.226099	0.259326
Biological Process	GO:0044703	4	multi-organism reproductive process	1.33	0.0022856	A0A5G2R446	381	K	3.173	0.0118014	Up	Chaperonin containing TCP1 subunit 6B OS=Sus scrofa OX=9823 GN=CCT6B PE=3 SV=1	CCT6B	1	2.12394e-19	261.87	3	GPNK(1)HTLTQIK	-0.57625	1.58003	1.0529	1.92917	0.681799	0.371904	0.384197
Biological Process	GO:0044703	4	multi-organism reproductive process	1.33	0.0022856	A0A5G2R446	159	K	7.901	0.0213234	Up	Chaperonin containing TCP1 subunit 6B OS=Sus scrofa OX=9823 GN=CCT6B PE=3 SV=1	CCT6B	1	1.97093e-10	133.15	3	TSLQTK(1)VHPELANVLTETVVESVLAVR	0.26689	1.56977	0.723263	2.31792		0.197625	0.191422
Biological Process	GO:0044703	4	multi-organism reproductive process	1.33	0.0022856	A0A5G2QHR7	152	K	21.102	0.000857334	Up	Testis, prostate and placenta expressed OS=Sus scrofa OX=9823 GN=TEPP PE=4 SV=1	TEPP	1	0.0185318	109.7	2	LPCLGK(1)R	0.11842	1.41223	1.24433	2.19032		0.0782129	0.0749121
Biological Process	GO:0044703	4	multi-organism reproductive process	1.33	0.0022856	A0A5G2QHR7	166	K	20.114	0.00323014	Up	Testis, prostate and placenta expressed OS=Sus scrofa OX=9823 GN=TEPP PE=4 SV=1	TEPP	1	0.00043078	161.79	2	YLK(1)PEVTQNWR	-0.3293	1.31271	1.31996	3.08316	0.176165	0.0586718	0.0493362
Biological Process	GO:0044703	4	multi-organism reproductive process	1.33	0.0022856	A0A5G2QHV4	383	K	13.353	0.00478197	Up	Sperm associated antigen 6 OS=Sus scrofa OX=9823 GN=SPAG6 PE=4 SV=1	SPAG6	1	0.000234419	196.86	2	AIK(1)NILQK	0.051531	1.18769	1.3385	3.05577	0.247093	0.0920181	0.0789303
Biological Process	GO:0044703	4	multi-organism reproductive process	1.33	0.0022856	A0A5G2QE15	301	K	11.033	0.00106216	Up	Zona pellucida-binding protein 1 OS=Sus scrofa OX=9823 GN=ZPBP PE=3 SV=1	ZPBP	1	1.88261e-05	150.08	3	CFPGYGMNILK(1)HPK	-0.10836	1.30275	1.42516	2.77347	0.148631	0.134137	0.215851
Biological Process	GO:0044703	4	multi-organism reproductive process	1.33	0.0022856	A0A5G2QHV4	241	K	7.032	0.00489301	Up	Sperm associated antigen 6 OS=Sus scrofa OX=9823 GN=SPAG6 PE=4 SV=1	SPAG6	1	0.0178538	119.17	2	DK(1)DEYVK	2.5852	1.21484	1.23394	2.11822	0.245345		0.187651
Biological Process	GO:0044703	4	multi-organism reproductive process	1.33	0.0022856	A0A5G2QHV4	435	K	6.85	0.00640272	Up	Sperm associated antigen 6 OS=Sus scrofa OX=9823 GN=SPAG6 PE=4 SV=1	SPAG6	1	0.00603121	99.802	2	LFVTSGGLK(1)K	-1.0103	1.17038	1.21713	2.84817	0.371769	0.201043	0.19151
Biological Process	GO:0044703	4	multi-organism reproductive process	1.33	0.0022856	A0A5G2QMG1	266	K	7.144	0.00692712	Up	CCT-beta OS=Sus scrofa OX=9823 GN=CCT2 PE=1 SV=1	CCT2	1	4.0407e-13	240.47	3	ILK(1)HGINCFINR	-0.77671	1.84459	1.01841	2.40026	0.405195	0.161584	0.16996
Biological Process	GO:0044703	4	multi-organism reproductive process	1.33	0.0022856	A0A5G2QMG1	22	K	4.144	0.0124289	Up	CCT-beta OS=Sus scrofa OX=9823 GN=CCT2 PE=1 SV=1	CCT2	1	4.63809e-11	171.91	2	LSSFIGAIAIGDLVK(1)STLGPK	0.33496	1.62151	1.0065	2.20559	0.568983	0.249522	0.347902
Biological Process	GO:0044703	4	multi-organism reproductive process	1.33	0.0022856	A0A5G2QN54	501	K	6.031	0.00574724	Up	T-complex protein 1 subunit delta OS=Sus scrofa OX=9823 GN=CCT4 PE=1 SV=1	CCT4	1	8.04041e-05	155.53	2	SILK(1)IDDVVNTR	-0.016935	1.77142	0.975943	2.39922	0.389185	0.266062	0.198166
Biological Process	GO:0044703	4	multi-organism reproductive process	1.33	0.0022856	A0A5G2QPK6	58	K	14.471	0.00105459	Up	Dihydrolipoyl dehydrogenase OS=Sus scrofa OX=9823 GN=DLD PE=1 SV=1	DLD	1	6.98919e-05	196.48	2	AAQLGFK(1)TVCIEK	0.0011054	1.63951	1.56697	2.40569	0.205739	0.0759641	0.106127
Biological Process	GO:0044703	4	multi-organism reproductive process	1.33	0.0022856	A0A5G2QPK6	96	K	7.669	0.00101237	Up	Dihydrolipoyl dehydrogenase OS=Sus scrofa OX=9823 GN=DLD PE=1 SV=1	DLD	1	6.69026e-49	313.04	4	ALLNNSHYYHMAHGK(1)DFASR	0.81498	1.90275	1.34769	2.05746	0.18081	0.180116	0.331169
Biological Process	GO:0044703	4	multi-organism reproductive process	1.33	0.0022856	A0A5G2QPK6	135	K	2.712	0.0179189	Up	Dihydrolipoyl dehydrogenase OS=Sus scrofa OX=9823 GN=DLD PE=1 SV=1	DLD	1	2.83008e-140	407.16	3	SNAVK(1)ALTGGIAHLFK(1)QNK	-0.511	1.39969	1.94509	1.03871	0.37931	0.71524	0.52196
Biological Process	GO:0044703	4	multi-organism reproductive process	1.33	0.0022856	A0A5G2QPK6	409	K	4.416	0.00806848	Up	Dihydrolipoyl dehydrogenase OS=Sus scrofa OX=9823 GN=DLD PE=1 SV=1	DLD	1	9.81057e-41	315.21	2	EEGIEYK(1)VGK	0.0090722	1.65767	1.73328	1.50127	0.597975	0.312334	0.197473
Biological Process	GO:0044703	4	multi-organism reproductive process	1.33	0.0022856	A0A5G2QPK6	269	K	10.152	0.000750656	Up	Dihydrolipoyl dehydrogenase OS=Sus scrofa OX=9823 GN=DLD PE=1 SV=1	DLD	1	0.00021351	178.55	2	LNTK(1)VIGATK	-0.50256	1.41263	1.84138	2.20799	0.246217	0.175624	0.11616
Biological Process	GO:0044703	4	multi-organism reproductive process	1.33	0.0022856	A0A5G2QHV4	258	K	14.735	0.0123856	Up	Sperm associated antigen 6 OS=Sus scrofa OX=9823 GN=SPAG6 PE=4 SV=1	SPAG6	1	8.3393e-29	206	4	EIAK(1)HTPELSQLIVNAGGVAAVIDCIGSCK	-0.26782	1.02412	1.3687	2.39076	0.16095		0.0554727
Biological Process	GO:0044703	4	multi-organism reproductive process	1.33	0.0022856	A0A5G2QE15	252	K	4.588	0.0173646	Up	Zona pellucida-binding protein 1 OS=Sus scrofa OX=9823 GN=ZPBP PE=3 SV=1	ZPBP	1	0.0116695	151.29	2	AK(1)NLIER	2.2462	1.12094	1.13883	2.66652	0.534322	0.318087	0.221299
Biological Process	GO:0044703	4	multi-organism reproductive process	1.33	0.0022856	A0A5G2QCB4	451	K	9.645	0.000358435	Up	Glutathione reductase OS=Sus scrofa OX=9823 GN=GSR PE=1 SV=1	GSR	1	4.74341e-16	245.92	2	IYSTTFTPMYHAVTK(1)R	0.22082	1.49982	1.45152	2.48499	0.205327	0.20542	0.152921
Biological Process	GO:0044703	4	multi-organism reproductive process	1.33	0.0022856	A0A5G2QC85	382	K	2.222	0.0286319	Up	Phosphoinositide phospholipase C OS=Sus scrofa OX=9823 GN=PLCZ1 PE=4 SV=1	PLCZ1	1	3.3359e-06	126.17	2	IATALSDLVIYTK(1)VEK	-0.20873	1.17597	1.11705	1.553	0.695598	0.458385
Biological Process	GO:0044703	4	multi-organism reproductive process	1.33	0.0022856	A0A287AUN6	211	K	7.175	0.00728864	Up	WD_REPEATS_REGION domain-containing protein OS=Sus scrofa OX=9823 GN=SPAG16 PE=4 SV=2	SPAG16	1	0.0241427	82.452	2	LINDLK(1)GLK	0.18539	1.92039		2.21504	0.429662	0.240148	0.194754
Biological Process	GO:0044703	4	multi-organism reproductive process	1.33	0.0022856	F1RFQ6	26	K	2.474	0.0318711	Up	Syntaxin 2 OS=Sus scrofa OX=9823 GN=STX2 PE=3 SV=3	STX2	1	0.00320831	111.46	2	IAQYVEEVK(1)K	-0.06172	1.15312	1.34715	1.77272	0.916301	0.400289	0.41042
Biological Process	GO:0044703	4	multi-organism reproductive process	1.33	0.0022856	A0A287B3T4	133	K	6.735	0.00885957	Up	Theg spermatid protein OS=Sus scrofa OX=9823 GN=THEG PE=4 SV=2	THEG	1	0.000725075	141.02	2	PK(1)TNWQVLK	-0.28338	1.60808	1.21244	2.40384	0.469238	0.147675	0.158733
Biological Process	GO:0044703	4	multi-organism reproductive process	1.33	0.0022856	A0A287B423	266	K	7.41	0.0307549	Up	Sperm equatorial segment protein 1 OS=Sus scrofa OX=9823 GN=SPESP1 PE=4 SV=1	SPESP1	1	9.44376e-05	144.65	2	MYK(1)SQMLPLGR	1.048	1.09658	0.98522	2.5055	0.298981	0.113719
Biological Process	GO:0044703	4	multi-organism reproductive process	1.33	0.0022856	A0A287B423	295	K	11.59	0.0069008	Up	Sperm equatorial segment protein 1 OS=Sus scrofa OX=9823 GN=SPESP1 PE=4 SV=1	SPESP1	1	2.5477e-11	200.55	2	SK(1)LSEYLDIQYVPPEMR	0.88309	1.41691	0.965924	2.34521	0.161547	0.110408
Biological Process	GO:0044703	4	multi-organism reproductive process	1.33	0.0022856	P00506	90	K	27.053	0.000878985	Up	Aspartate aminotransferase, mitochondrial OS=Sus scrofa OX=9823 GN=GOT2 PE=1 SV=2	GOT2	1	1.28758e-38	315.59	2	K(1)AEAQIAAK(1)NLDK	-0.28283	1.73603	1.80514	2.24496	0.126186	0.0526204	0.0350725
Biological Process	GO:0044703	4	multi-organism reproductive process	1.33	0.0022856	P00506	122	K	4.877	0.0126835	Up	Aspartate aminotransferase, mitochondrial OS=Sus scrofa OX=9823 GN=GOT2 PE=1 SV=2	GOT2	1	4.4751e-100	385.31	2	ASAELALGENNEVLK(1)SGR	-0.26663	1.24871	1.6234	2.1069	0.602666	0.178371	0.239957
Biological Process	GO:0044703	4	multi-organism reproductive process	1.33	0.0022856	P00506	73	K	4.807	0.0021095	Up	Aspartate aminotransferase, mitochondrial OS=Sus scrofa OX=9823 GN=GOT2 PE=1 SV=2	GOT2	1	0.00311676	112.13	2	DDNGK(1)PYVLPSVR	-0.24733	1.52005	1.67046	1.77625	0.371542	0.21292	0.448776
Biological Process	GO:0044703	4	multi-organism reproductive process	1.33	0.0022856	P00506	159	K	27.652	0.00017082	Up	Aspartate aminotransferase, mitochondrial OS=Sus scrofa OX=9823 GN=GOT2 PE=1 SV=2	GOT2	1	2.28188e-25	259.7	2	DVFLPK(1)PSWGNHTPIFR	-0.14649	2.4752	1.57385	1.74154	0.08588	0.0787644	0.0447638
Biological Process	GO:0044703	4	multi-organism reproductive process	1.33	0.0022856	P00506	404	K	13.671	0.00011086	Up	Aspartate aminotransferase, mitochondrial OS=Sus scrofa OX=9823 GN=GOT2 PE=1 SV=2	GOT2	1	3.9735e-05	205.09	2	EFSIYMTK(1)DGR	-0.40074	1.99297	1.75064	1.84742	0.185849	0.11365	0.10947
Biological Process	GO:0044703	4	multi-organism reproductive process	1.33	0.0022856	P00506	234	K	11.05	0.000617036	Up	Aspartate aminotransferase, mitochondrial OS=Sus scrofa OX=9823 GN=GOT2 PE=1 SV=2	GOT2	1	1.70945e-06	93.437	5	IPAQSVILLHACAHNPTGVDPRPEQWK(1)EMATLVK(1)K	-0.28561	1.64881	2.15028	1.70299	0.247217	0.139063	0.111637
Biological Process	GO:0044703	4	multi-organism reproductive process	1.33	0.0022856	P00506	279	K	32.497	0.000531278	Up	Aspartate aminotransferase, mitochondrial OS=Sus scrofa OX=9823 GN=GOT2 PE=1 SV=2	GOT2	1	3.08668e-46	282.05	3	HFIEQGINVCLCQSYAK(1)NMGLYGER	-0.21123	1.75921	1.28562	1.85466		0.0609308	0.0395821
Biological Process	GO:0044703	4	multi-organism reproductive process	1.33	0.0022856	P00506	345	K	8.513	0.00572542	Up	Aspartate aminotransferase, mitochondrial OS=Sus scrofa OX=9823 GN=GOT2 PE=1 SV=2	GOT2	1	8.52894e-05	179.19	3	QQWLQEVK(1)GMADR	-0.49791	1.41017	1.98195	1.24477	0.239821		0.123294
Biological Process	GO:0044703	4	multi-organism reproductive process	1.33	0.0022856	P00506	309	K	10.969	0.000213193	Up	Aspartate aminotransferase, mitochondrial OS=Sus scrofa OX=9823 GN=GOT2 PE=1 SV=2	GOT2	1	1.53243e-05	207.29	2	VESQLK(1)ILIR	0.4788	1.91308	1.91324	1.67237	0.228165	0.121864	0.151283
Biological Process	GO:0044703	4	multi-organism reproductive process	1.33	0.0022856	P00506	296	K	13.166	0.000619756	Up	Aspartate aminotransferase, mitochondrial OS=Sus scrofa OX=9823 GN=GOT2 PE=1 SV=2	GOT2	1	4.3194e-07	196.67	3	VGAFTVVCK(1)DAEEAK(1)R	0.22048	1.47011	1.86087	2.24548	0.212591	0.0968385	0.114108
Biological Process	GO:0044703	4	multi-organism reproductive process	1.33	0.0022856	P00506	185	K	7.392	0.000898733	Up	Aspartate aminotransferase, mitochondrial OS=Sus scrofa OX=9823 GN=GOT2 PE=1 SV=2	GOT2	1	1.17093e-17	213.49	2	YYDPK(1)TCGFDFTGALEDISK	1.4659	1.89835	1.72845	1.65824	0.351514	0.164186	0.199257
Biological Process	GO:0044703	4	multi-organism reproductive process	1.33	0.0022856	A0A287BMD8	221	K	9.722	0.0448861	Up	Izumo sperm-egg fusion 1 OS=Sus scrofa OX=9823 GN=IZUMO1 PE=3 SV=2	IZUMO1	1	2.24557e-07	177.04	2	GQEPTLTK(1)TMVSPK	0.0012793	0.889147	0.909892	2.8801	0.251452	0.0694081
Biological Process	GO:0044703	4	multi-organism reproductive process	1.33	0.0022856	A0A287BMD8	49	K	8.315	0.0123517	Up	Izumo sperm-egg fusion 1 OS=Sus scrofa OX=9823 GN=IZUMO1 PE=3 SV=2	IZUMO1	1	6.80206e-30	258.91	3	VVEELSSLETNYLPGHLEAK(1)HHK	0.42676	1.26908	1.01269	2.34713	0.134653	0.236453
Biological Process	GO:0044703	4	multi-organism reproductive process	1.33	0.0022856	A0A5G2Q9J9	153	K	24.524	0.00175499	Up	Spermatogenesis associated 6 OS=Sus scrofa OX=9823 GN=SPATA6 PE=3 SV=1	SPATA6	1	4.0287e-05	128.95	3	FTYHTAPVEK(1)SHSR	1.6748	1.60234	1.69285	1.57248	0.0404371	0.0918881
Biological Process	GO:0044703	4	multi-organism reproductive process	1.33	0.0022856	A0A5G2R4S9	19	K	10.605	0.00481189	Up	Septin 4 OS=Sus scrofa OX=9823 GN=SEPTIN4 PE=1 SV=1	SEPTIN4	1	0.000591062	97.081	3	FVK(1)DFPGSESYHQPEAK	0.24169	1.19162	1.14973	2.36291	0.140157	0.15558
Biological Process	GO:0044703	4	multi-organism reproductive process	1.33	0.0022856	A0A5G2QAH5	47	K	5.712	0.0226784	Up	Oxysterol-binding protein OS=Sus scrofa OX=9823 GN=OSBP2 PE=3 SV=1	OSBP2	1	1.19221e-20	221.24	3	LDDLSNCNELVAK(1)HGAALQR	0.34506	1.58346	1.03441	2.48822	0.584125	0.124396	0.185396
Biological Process	GO:0044703	4	multi-organism reproductive process	1.33	0.0022856	A0A287AMZ2	222	K	1.942	0.00615858	Up	T-complex protein 1 subunit gamma OS=Sus scrofa OX=9823 GN=CCT3 PE=1 SV=1	CCT3	1	8.37135e-14	255.11	3	GVMINK(1)DVTHPR	-0.93869	1.27605	1.43661	1.24805	0.843198	0.561538	0.634549
Biological Process	GO:0044703	4	multi-organism reproductive process	1.33	0.0022856	A0A5G2QPK6	338	K	5.662	0.00569049	Up	Dihydrolipoyl dehydrogenase OS=Sus scrofa OX=9823 GN=DLD PE=1 SV=1	DLD	1	2.12613e-09	154.65	3	FQTK(1)IPNIYAIGDVVAGPMLAHK	-0.4543	1.04519	1.32725	2.7269	0.242605	0.311758	0.346298
Biological Process	GO:0044703	4	multi-organism reproductive process	1.33	0.0022856	A0A286ZQW4	853	K	9.764	0.0495857	Up	Nucleoporin 210 like OS=Sus scrofa OX=9823 GN=NUP210L PE=3 SV=2	NUP210L	1	0.000113762	134.49	3	LHGHQILK(1)VHQIK	-1.4906	1.10133		2.52707		0.2418	0.129798
Biological Process	GO:0006105	8	succinate metabolic process	2.78	0.00209019	I3LDC1	123	K	8.365	0.00179527	Up	Succinate dehydrogenase [ubiquinone] iron-sulfur subunit, mitochondrial OS=Sus scrofa OX=9823 GN=SDHB PE=1 SV=1	SDHB	1	0.00031718	171.67	3	RIDTNLNK(1)VSK	0.085047	1.53883	1.38515	2.43532	0.321014	0.167145	0.152548
Biological Process	GO:0090407	6	organophosphate biosynthetic process	1.41	0.00198558	F1SLA0	402	K	2.794	0.0106685	Up	ATP synthase subunit beta OS=Sus scrofa OX=9823 GN=ATP5F1B PE=1 SV=3	ATP5F1B	1	0.00100762	75.773	3	FLSQPFQVAEVFTGHLGK(1)LVPLK	0.25155	1.15023	1.6496	1.23687		0.41109	0.552206
Biological Process	GO:0090407	6	organophosphate biosynthetic process	1.41	0.00198558	F1SLA0	123	K	7.405	0.00970909	Up	ATP synthase subunit beta OS=Sus scrofa OX=9823 GN=ATP5F1B PE=1 SV=3	ATP5F1B	1	0.000997598	119.53	2	GGK(1)IGLFGGAGVGK	-0.12943	1.31266	1.13613	2.83733	0.404547	0.133587	0.175749
Biological Process	GO:0090407	6	organophosphate biosynthetic process	1.41	0.00198558	F1SLA0	120	K	12.981	5.09182e-05	Up	ATP synthase subunit beta OS=Sus scrofa OX=9823 GN=ATP5F1B PE=1 SV=3	ATP5F1B	1	0.00154021	121.83	3	VVDLLAPYAK(1)GGK	-0.78541	1.88431	1.51837	2.16815	0.170641	0.129466	0.12906
Biological Process	GO:0090407	6	organophosphate biosynthetic process	1.41	0.00198558	F1SLG6	268	K	14.103	0.000399564	Up	Deoxyguanosine kinase OS=Sus scrofa OX=9823 GN=DGUOK PE=3 SV=2	DGUOK	1	0.00401414	173.93	2	QEELMK(1)R	0.28728	1.92364	1.48796	1.36271		0.123147	0.102546
Biological Process	GO:0090407	6	organophosphate biosynthetic process	1.41	0.00198558	F1SLG6	275	K	11.539	0.00025775	Up	Deoxyguanosine kinase OS=Sus scrofa OX=9823 GN=DGUOK PE=3 SV=2	DGUOK	1	0.0009688	173.59	2	VNTFVK(1)NL	0.11549	1.7783	1.52111	2.22207	0.117727	0.150027	0.210772
Biological Process	GO:0090407	6	organophosphate biosynthetic process	1.41	0.00198558	I3LDY2	169	K	3.686	0.0253522	Up	Isopentenyl-diphosphate Delta-isomerase OS=Sus scrofa OX=9823 GN=IDI1 PE=1 SV=2	IDI1	1	3.97295e-46	288.94	3	KDVTLNPDPNEIK(1)SHCYVSQEELK	0.20114	1.06786	1.30338	2.34824	0.67771	0.238345	0.364475
Biological Process	GO:0090407	6	organophosphate biosynthetic process	1.41	0.00198558	K7GS22	106	K	4.456	0.00603714	Up	ATP synthase subunit epsilon, mitochondrial (Fragment)(predicted) OS=Sus scrofa OX=9823 GN=ATP5F1E PE=1 SV=1	ATP5F1E	1	0.000311566	167.23	2	YSQICAK(1)AVR	0.38176	1.66861	1.89084	1.34084	0.585443	0.272829	0.24144
Biological Process	GO:0090407	6	organophosphate biosynthetic process	1.41	0.00198558	Q1KYT0	80	K	12.668	0.0019594	Up	Beta-enolase OS=Sus scrofa OX=9823 GN=ENO3 PE=2 SV=1	ENO3	1	0.00811492	93.111	2	TLGPALLEK(1)K	-1.5338	1.60927	1.67882	1.46193	0.164851	0.0851296
Biological Process	GO:0090407	6	organophosphate biosynthetic process	1.41	0.00198558	Q1KYT0	28	K	2.74	0.0413296	Up	Beta-enolase OS=Sus scrofa OX=9823 GN=ENO3 PE=2 SV=1	ENO3	1	7.49674e-05	121.31	3	GNPTVEVDLHTAK(1)GR	0.86584	1.59564	1.59383	0.83211	0.474158	0.504258
Biological Process	GO:0090407	6	organophosphate biosynthetic process	1.41	0.00198558	F1SLA0	181	K	5.224	0.00736412	Up	ATP synthase subunit beta OS=Sus scrofa OX=9823 GN=ATP5F1B PE=1 SV=3	ATP5F1B	1	5.53867e-18	183.05	3	EGNDLYHEMIESGVINLK(1)DATSK	-1.6087	1.57695	2.30766		0.502214	0.309979	0.303192
Biological Process	GO:0090407	6	organophosphate biosynthetic process	1.41	0.00198558	Q35914	46	K	52.17	0.000217935	Up	ATP synthase protein 8 OS=Sus scrofa OX=9823 GN=MT-ATP8 PE=1 SV=2	MT-ATP8	1	9.94447e-05	134.49	3	TQK(1)HSTPWEMK	-0.67298	1.64019	2.11007	2.1369	0.0625158	0.0237919	0.0265368
Biological Process	GO:0090407	6	organophosphate biosynthetic process	1.41	0.00198558	Q5S3G4	86	K	5.444	0.00289555	Up	Cytochrome c oxidase subunit 5B, mitochondrial OS=Sus scrofa OX=9823 GN=COX5B PE=2 SV=1	COX5B	1	4.07274e-05	154.15	2	EDPNLVPSITNK(1)R	0.15164	1.42037	1.77895	1.86961	0.463248	0.19139	0.276426
Biological Process	GO:0090407	6	organophosphate biosynthetic process	1.41	0.00198558	Q5S3G4	121	K	2.951	0.00836663	Up	Cytochrome c oxidase subunit 5B, mitochondrial OS=Sus scrofa OX=9823 GN=COX5B PE=2 SV=1	COX5B	1	2.60102e-15	229.02	3	CPSCGTHYK(1)LVSHQLAH	-1.3063	1.27093	2.02523	1.18538	0.629776	0.506028	0.382653
Biological Process	GO:0090407	6	organophosphate biosynthetic process	1.41	0.00198558	Q5S3G4	57	K	6.556	0.00645563	Up	Cytochrome c oxidase subunit 5B, mitochondrial OS=Sus scrofa OX=9823 GN=COX5B PE=2 SV=1	COX5B	1	0.000247349	182.54	2	K(1)GLDPYNILAPK	0.34386	1.46868	1.74772	1.32211	0.309129	0.152358
Biological Process	GO:0006086	14	acetyl-CoA biosynthetic process from pyruvate	2.78	0.00209019	A0A5G2QIE6	270	K	8.54	0.0212944	Up	Acetyltransferase component of pyruvate dehydrogenase complex OS=Sus scrofa OX=9823 GN=DLAT PE=1 SV=1	DLAT	1	4.7975e-11	229.29	2	GIDLTQIK(1)GTGPDGR	-0.11319	1.09551	1.33998	2.20244	0.27587	0.0862052
Biological Process	GO:0006086	14	acetyl-CoA biosynthetic process from pyruvate	2.78	0.00209019	A0A5G2QIE6	367	K	18.394	2.74021e-05	Up	Acetyltransferase component of pyruvate dehydrogenase complex OS=Sus scrofa OX=9823 GN=DLAT PE=1 SV=1	DLAT	1	6.71423e-05	143.4	2	SK(1)ISVNDFIIK	0.035448	1.45822	2.10129	2.13112	0.0930524	0.105726	0.110598
Biological Process	GO:0006086	14	acetyl-CoA biosynthetic process from pyruvate	2.78	0.00209019	A0A5G2QPK6	58	K	14.471	0.00105459	Up	Dihydrolipoyl dehydrogenase OS=Sus scrofa OX=9823 GN=DLD PE=1 SV=1	DLD	1	6.98919e-05	196.48	2	AAQLGFK(1)TVCIEK	0.0011054	1.63951	1.56697	2.40569	0.205739	0.0759641	0.106127
Biological Process	GO:0006086	14	acetyl-CoA biosynthetic process from pyruvate	2.78	0.00209019	A0A5G2QPK6	96	K	7.669	0.00101237	Up	Dihydrolipoyl dehydrogenase OS=Sus scrofa OX=9823 GN=DLD PE=1 SV=1	DLD	1	6.69026e-49	313.04	4	ALLNNSHYYHMAHGK(1)DFASR	0.81498	1.90275	1.34769	2.05746	0.18081	0.180116	0.331169
Biological Process	GO:0006086	14	acetyl-CoA biosynthetic process from pyruvate	2.78	0.00209019	A0A5G2QPK6	135	K	2.712	0.0179189	Up	Dihydrolipoyl dehydrogenase OS=Sus scrofa OX=9823 GN=DLD PE=1 SV=1	DLD	1	2.83008e-140	407.16	3	SNAVK(1)ALTGGIAHLFK(1)QNK	-0.511	1.39969	1.94509	1.03871	0.37931	0.71524	0.52196
Biological Process	GO:0006086	14	acetyl-CoA biosynthetic process from pyruvate	2.78	0.00209019	A0A5G2QPK6	409	K	4.416	0.00806848	Up	Dihydrolipoyl dehydrogenase OS=Sus scrofa OX=9823 GN=DLD PE=1 SV=1	DLD	1	9.81057e-41	315.21	2	EEGIEYK(1)VGK	0.0090722	1.65767	1.73328	1.50127	0.597975	0.312334	0.197473
Biological Process	GO:0090407	6	organophosphate biosynthetic process	1.41	0.00198558	Q5S3G4	74	K	7.268	0.0014986	Up	Cytochrome c oxidase subunit 5B, mitochondrial OS=Sus scrofa OX=9823 GN=COX5B PE=2 SV=1	COX5B	1	2.17713e-13	220.21	3	AASGTK(1)EDPNLVPSITNK	0.15485	1.3946	1.75735	2.12236	0.333291	0.241888	0.150505
Biological Process	GO:0090407	6	organophosphate biosynthetic process	1.41	0.00198558	F1SLA0	186	K	10.948	0.00494248	Up	ATP synthase subunit beta OS=Sus scrofa OX=9823 GN=ATP5F1B PE=1 SV=3	ATP5F1B	1	3.48884e-73	349.36	2	DATSK(1)VALVYGQMNEPPGAR	0.1646	1.56605	1.59411	2.33768	0.31474	0.0705891	0.116829
Biological Process	GO:0090407	6	organophosphate biosynthetic process	1.41	0.00198558	F1SFX0	278	K	2.695	0.0275503	Up	L-lactate dehydrogenase OS=Sus scrofa OX=9823 GN=LDHC PE=2 SV=2	LDHC	1	1.22758e-06	178.1	3	VHPVSTMVK(1)GLYGIK	-0.54755	1.1205	1.22741	2.02824	0.774817	0.504547	0.344485
Biological Process	GO:0090407	6	organophosphate biosynthetic process	1.41	0.00198558	F1SFX0	217	K	9.568	0.00607823	Up	L-lactate dehydrogenase OS=Sus scrofa OX=9823 GN=LDHC PE=2 SV=2	LDHC	1	1.48714e-15	251.84	2	TLDPK(1)LGTDSDKDQWK	0.3983	2.12055	2.20182		0.348453	0.181568	0.147612
Biological Process	GO:0090407	6	organophosphate biosynthetic process	1.41	0.00198558	I3LCI2	83	K	2.468	0.0111998	Up	Pyruvate dehydrogenase E1 component subunit alpha OS=Sus scrofa OX=9823 GN=PDHA1 PE=1 SV=2	PDHA1	1	2.11455e-13	245.15	3	RMELK(1)ADQLYK(1)QK	-0.75819	1.26937	1.80276	1.19758	0.410631	0.633634	0.686031
Biological Process	GO:0090407	6	organophosphate biosynthetic process	1.41	0.00198558	I3LCI2	85	K	9.005	0.000162366	Up	Pyruvate dehydrogenase E1 component subunit alpha OS=Sus scrofa OX=9823 GN=PDHA1 PE=1 SV=2	PDHA1	1	0.000436708	138.22	2	ADQLYK(1)QK(1)IIR	-0.94509	1.44813	1.61689	2.33528	0.182028	0.226178	0.19149
Biological Process	GO:0090407	6	organophosphate biosynthetic process	1.41	0.00198558	I3LCI2	149	K	30.357	0.00264492	Up	Pyruvate dehydrogenase E1 component subunit alpha OS=Sus scrofa OX=9823 GN=PDHA1 PE=1 SV=2	PDHA1	1	0.000497327	166.66	2	GK(1)GGSMHMYAK	-0.26957	1.20887	1.1745	2.50919		0.0416124	0.0658308
Biological Process	GO:0090407	6	organophosphate biosynthetic process	1.41	0.00198558	I3LCI2	77	K	7.793	0.000756203	Up	Pyruvate dehydrogenase E1 component subunit alpha OS=Sus scrofa OX=9823 GN=PDHA1 PE=1 SV=2	PDHA1	1	2.11455e-13	245.15	3	RMELK(1)ADQLYK(1)QK	-0.75819	1.64932	1.96265	1.70571	0.290556	0.25052	0.141251
Biological Process	GO:0090407	6	organophosphate biosynthetic process	1.41	0.00198558	I3LCI2	321	K	7.822	0.000142572	Up	Pyruvate dehydrogenase E1 component subunit alpha OS=Sus scrofa OX=9823 GN=PDHA1 PE=1 SV=2	PDHA1	1	7.16903e-05	200.93	2	SK(1)SDPIMLLK(1)DR	-0.73938	1.52532	2.28207	1.51246	0.220389	0.247774	0.211984
Biological Process	GO:0090407	6	organophosphate biosynthetic process	1.41	0.00198558	I3LCI2	277	K	5.209	0.00236988	Up	Pyruvate dehydrogenase E1 component subunit alpha OS=Sus scrofa OX=9823 GN=PDHA1 PE=1 SV=2	PDHA1	1	2.82417e-14	251.03	2	SGK(1)GPILMELQTYR	2.0211	1.31828	1.80506	1.30939		0.244799	0.322474
Biological Process	GO:0090407	6	organophosphate biosynthetic process	1.41	0.00198558	I3LCI2	313	K	13.059	0.000364323	Up	Pyruvate dehydrogenase E1 component subunit alpha OS=Sus scrofa OX=9823 GN=PDHA1 PE=1 SV=2	PDHA1	1	4.7682e-05	200.93	2	SK(1)SDPIMLLK(1)DR	-0.73938	1.98833	2.05998	1.5249	0.20686	0.115592	0.104335
Biological Process	GO:0090407	6	organophosphate biosynthetic process	1.41	0.00198558	Q95339	48	K	3.421	0.0443506	Up	ATP synthase subunit f, mitochondrial OS=Sus scrofa OX=9823 GN=ATP5MF PE=1 SV=4	ATP5MF	1	0.00198235	126.28	2	YYNK(1)YVNVK	0.069426		1.14579	2.33014	0.707356	0.375224	0.441488
Biological Process	GO:0090407	6	organophosphate biosynthetic process	1.41	0.00198558	D2D0E6	151	K	8.729	0.00142869	Up	Malonyl-CoA decarboxylase OS=Sus scrofa OX=9823 GN=MLYCD PE=4 SV=1	MLYCD	1	0.0136598	61.657	3	SLFHHISK(1)LDGGVR	-2.578	1.93742	1.65143			0.209281	0.201865
Biological Process	GO:0090407	6	organophosphate biosynthetic process	1.41	0.00198558	F1RM74	147	K	1.994	0.0125941	Up	Glyceraldehyde-3-phosphate dehydrogenase OS=Sus scrofa OX=9823 GN=GAPDHS PE=1 SV=3	GAPDHS	1	0.000153924	147.51	2	EINVFQCK(1)QPK	1.3588	1.2332		1.43087	0.652366	0.683567
Biological Process	GO:0090407	6	organophosphate biosynthetic process	1.41	0.00198558	F1RM74	294	K	3.469	0.00569161	Up	Glyceraldehyde-3-phosphate dehydrogenase OS=Sus scrofa OX=9823 GN=GAPDHS PE=1 SV=3	GAPDHS	1	0.000294522	168.23	2	GK(1)LTGMAFR	0.045488	1.27916	1.28329	2.09482	0.581429	0.332827	0.428462
Biological Process	GO:0090407	6	organophosphate biosynthetic process	1.41	0.00198558	F1RM74	130	K	12.66	0.00241588	Up	Glyceraldehyde-3-phosphate dehydrogenase OS=Sus scrofa OX=9823 GN=GAPDHS PE=1 SV=3	GAPDHS	1	0.000297908	170.95	2	GTVEYK(1)NDK	-0.81293	1.34678	1.169	3.04498	0.210911	0.122998	0.105329
Biological Process	GO:0090407	6	organophosphate biosynthetic process	1.41	0.00198558	F1RM74	115	K	3.82	0.0475356	Up	Glyceraldehyde-3-phosphate dehydrogenase OS=Sus scrofa OX=9823 GN=GAPDHS PE=1 SV=3	GAPDHS	1	1.06131e-06	111.44	3	VVAVNDPFIDPEYMVYMFK(1)YDSTHGR	-0.17391	1.49391	0.848235	1.91499		0.23936	0.503503
Biological Process	GO:0090407	6	organophosphate biosynthetic process	1.41	0.00198558	F1S0N2	583	K	3.294	0.0244049	Up	ATP-citrate synthase OS=Sus scrofa OX=9823 GN=ACLY PE=1 SV=3	ACLY	1	0.000677883	116.01	2	EILIPVFK(1)NMADAMK	-0.50779	1.11378	1.39725	2.09167	0.774168	0.293825	0.329308
Biological Process	GO:0090407	6	organophosphate biosynthetic process	1.41	0.00198558	F1S0N2	272	K	2.689	0.0397425	Up	ATP-citrate synthase OS=Sus scrofa OX=9823 GN=ACLY PE=1 SV=3	ACLY	1	0.00125457	134.81	2	LTLLNPK(1)GR	-0.21039	1.65104	0.884292	1.47144		0.413896	0.57933
Biological Process	GO:0090407	6	organophosphate biosynthetic process	1.41	0.00198558	F1S0N2	569	K	2.762	0.00634585	Up	ATP-citrate synthase OS=Sus scrofa OX=9823 GN=ACLY PE=1 SV=3	ACLY	1	0.0264778	47.574	3	QK(1)FYWGHK	-0.55299	1.63555	1.21061	1.18156		0.448414	0.52386
Biological Process	GO:0090407	6	organophosphate biosynthetic process	1.41	0.00198558	F1S4S3	20	K	5.751	0.00749399	Up	2-phospho-D-glycerate hydro-lyase OS=Sus scrofa OX=9823 GN=ENO4 PE=3 SV=4	ENO4	1	6.80195e-05	177.7	2	LK(1)QQALEYYR	-0.02886	1.56715	1.0337	2.51044	0.447789	0.216263	0.224661
Biological Process	GO:0090407	6	organophosphate biosynthetic process	1.41	0.00198558	F1SAQ8	182	K	9.291	0.00236575	Up	Nucleoside-diphosphate kinase OS=Sus scrofa OX=9823 GN=AK7 PE=4 SV=3	AK7	1	4.96123e-06	180.27	3	K(1)HHPNFLDHINAEK	0.26996	1.99572	1.61558		0.199017		0.18968
Biological Process	GO:0090407	6	organophosphate biosynthetic process	1.41	0.00198558	F1SFX0	228	K	7.402	0.0103166	Up	L-lactate dehydrogenase OS=Sus scrofa OX=9823 GN=LDHC PE=2 SV=2	LDHC	1	3.09141e-114	393.33	2	DQWK(1)NIHK	-0.90744	1.1003	1.10626	2.38033	0.220709	0.192398
Biological Process	GO:0090407	6	organophosphate biosynthetic process	1.41	0.00198558	F1SFX0	81	K	3.789	0.00124263	Up	L-lactate dehydrogenase OS=Sus scrofa OX=9823 GN=LDHC PE=2 SV=2	LDHC	1	3.39125e-06	202.27	2	IVSGK(1)DYSVSANSK	-0.80078	1.16144	1.68393	1.90164	0.469981	0.405258	0.377748
Biological Process	GO:0090407	6	organophosphate biosynthetic process	1.41	0.00198558	F1SFX0	224	K	7.918	0.00282901	Up	L-lactate dehydrogenase OS=Sus scrofa OX=9823 GN=LDHC PE=2 SV=2	LDHC	1	5.23224e-06	218.58	2	LGTDSDK(1)DQWK	0.052794	1.91094	1.2493	2.16694	0.356349	0.141774	0.174711
Biological Process	GO:0006086	14	acetyl-CoA biosynthetic process from pyruvate	2.78	0.00209019	A0A5G2QPK6	269	K	10.152	0.000750656	Up	Dihydrolipoyl dehydrogenase OS=Sus scrofa OX=9823 GN=DLD PE=1 SV=1	DLD	1	0.00021351	178.55	2	LNTK(1)VIGATK	-0.50256	1.41263	1.84138	2.20799	0.246217	0.175624	0.11616
Biological Process	GO:0006105	8	succinate metabolic process	2.78	0.00209019	I3LDC1	80	K	7.93	0.00197892	Up	Succinate dehydrogenase [ubiquinone] iron-sulfur subunit, mitochondrial OS=Sus scrofa OX=9823 GN=SDHB PE=1 SV=1	SDHB	1	2.26785e-08	221.59	3	IK(1)NEIDSTLTFR	-0.36253	1.6269	1.37465	2.32652	0.33147	0.19973	0.140729
Biological Process	GO:0006086	14	acetyl-CoA biosynthetic process from pyruvate	2.78	0.00209019	A0A5G2QPK6	338	K	5.662	0.00569049	Up	Dihydrolipoyl dehydrogenase OS=Sus scrofa OX=9823 GN=DLD PE=1 SV=1	DLD	1	2.12613e-09	154.65	3	FQTK(1)IPNIYAIGDVVAGPMLAHK	-0.4543	1.04519	1.32725	2.7269	0.242605	0.311758	0.346298
Biological Process	GO:0006086	14	acetyl-CoA biosynthetic process from pyruvate	2.78	0.00209019	A0A5G2QPK6	151	K	12.703	0.000528701	Up	Dihydrolipoyl dehydrogenase OS=Sus scrofa OX=9823 GN=DLD PE=1 SV=1	DLD	1	5.05413e-10	201.61	3	ITGK(1)NQVTATK(1)ADGSTEVINTK	0.16389	1.75435	1.80692	2.00089	0.222108	0.0946223	0.121115
Biological Process	GO:0006105	8	succinate metabolic process	2.78	0.00209019	F1RK10	157	K	8.372	0.0144662	Up	Succinate--CoA ligase [ADP-forming] subunit beta, mitochondrial OS=Sus scrofa OX=9823 GN=SUCLA2 PE=1 SV=3	SUCLA2	1	0.000252942	150.81	2	EPIDIVEGIK(1)K	-0.30176	1.08762	1.57797	1.96561	0.269359	0.0994472
Biological Process	GO:0006105	8	succinate metabolic process	2.78	0.00209019	F1RK10	50	K	9.942	0.000113281	Up	Succinate--CoA ligase [ADP-forming] subunit beta, mitochondrial OS=Sus scrofa OX=9823 GN=SUCLA2 PE=1 SV=3	SUCLA2	1	0.00101433	127.4	2	GK(1)GTFESGLK	0.097095	1.69445	1.62331	1.36805	0.154362		0.159834
Biological Process	GO:0006105	8	succinate metabolic process	2.78	0.00209019	F1RK10	35	K	9.408	0.0159815	Up	Succinate--CoA ligase [ADP-forming] subunit beta, mitochondrial OS=Sus scrofa OX=9823 GN=SUCLA2 PE=1 SV=3	SUCLA2	1	0.00363903	126.39	2	LGSK(1)DVVIK	0.28794	1.3637	1.50613	1.79932	0.259564		0.0712916
Biological Process	GO:0006105	8	succinate metabolic process	2.78	0.00209019	F1RK10	85	K	9.477	0.0109903	Up	Succinate--CoA ligase [ADP-forming] subunit beta, mitochondrial OS=Sus scrofa OX=9823 GN=SUCLA2 PE=1 SV=3	SUCLA2	1	0.00142966	132.76	2	LFTK(1)QTGEK	0.70056	1.3525	1.77333	1.54557	0.246634		0.0819707
Biological Process	GO:0006105	8	succinate metabolic process	2.78	0.00209019	A0A5G2QIN8	319	K	4.487	0.0246806	Up	Aldehyde dehydrogenase 5 family member A1 OS=Sus scrofa OX=9823 GN=ALDH5A1 PE=1 SV=1	ALDH5A1	1	0.000868422	136.27	3	GIHDSFVK(1)K	-0.54088	2.18467	1.08874	1.63303	0.168477	0.68968	0.235411
Biological Process	GO:0006105	8	succinate metabolic process	2.78	0.00209019	A0A5G2QIN8	355	K	10.103	0.000216434	Up	Aldehyde dehydrogenase 5 family member A1 OS=Sus scrofa OX=9823 GN=ALDH5A1 PE=1 SV=1	ALDH5A1	1	0.000385609	124.6	2	VEK(1)HVIDAISK	-0.22712	1.99215	1.67125	1.79619	0.242916	0.164325	0.133176
Biological Process	GO:0006105	8	succinate metabolic process	2.78	0.00209019	A0A287B574	69	K	13.454	0.000809585	Up	Succinate--CoA ligase [ADP/GDP-forming] subunit alpha, mitochondrial OS=Sus scrofa OX=9823 GN=SUCLG1 PE=3 SV=2	SUCLG1	1	1.5541e-51	318.7	2	GGK(1)THLGLPVFNTVK	-0.4171	2.52201	1.47741	1.58546	0.206454	0.0946707	0.113987
Biological Process	GO:0006105	8	succinate metabolic process	2.78	0.00209019	A0A287B574	30	K	6.626	0.00102062	Up	Succinate--CoA ligase [ADP/GDP-forming] subunit alpha, mitochondrial OS=Sus scrofa OX=9823 GN=SUCLG1 PE=3 SV=2	SUCLG1	1	0.000948802	138.4	2	HLYVDK(1)NTK	-2.4741	1.27191	1.864	2.07731	0.35322	0.224493	0.209062
Biological Process	GO:0006105	8	succinate metabolic process	2.78	0.00209019	A0A287B574	168	K	5.747	0.00102914	Up	Succinate--CoA ligase [ADP/GDP-forming] subunit alpha, mitochondrial OS=Sus scrofa OX=9823 GN=SUCLG1 PE=3 SV=2	SUCLG1	1	0.00068043	125.31	2	IGIMPGHIHK(1)K	-0.50267	1.50735	1.58892	1.384	0.303875	0.215854
Biological Process	GO:0006105	8	succinate metabolic process	2.78	0.00209019	A0A287BA45	254	K	2.573	0.0024603	Up	Succinate--CoA ligase [GDP-forming] subunit beta, mitochondrial OS=Sus scrofa OX=9823 GN=SUCLG2 PE=3 SV=1	SUCLG2	1	2.61085e-08	172.98	2	QK(1)DIFAMDDK	0.20076	1.14501	1.82339	1.35228	0.570803	0.554345	0.554172
Biological Process	GO:0006105	8	succinate metabolic process	2.78	0.00209019	A0A287B574	24	K	21.156	0.000678481	Up	Succinate--CoA ligase [ADP/GDP-forming] subunit alpha, mitochondrial OS=Sus scrofa OX=9823 GN=SUCLG1 PE=3 SV=2	SUCLG1	1	0.0109422	131.03	2	K(1)HLYVDK	-2.3891	1.51417	1.92575	2.28927	0.150025	0.0646773	0.0561104
Biological Process	GO:0006105	8	succinate metabolic process	2.78	0.00209019	A0A5G2Q7D7	618	K	17.909	0.000138406	Up	Succinate dehydrogenase [ubiquinone] flavoprotein subunit, mitochondrial OS=Sus scrofa OX=9823 GN=SDHA PE=1 SV=1	SDHA	1	9.70185e-38	304.69	2	KHTLSYVDVK(1)TGK	0.94393	1.50972	2.18077	1.99221	0.143476	0.0912927	0.0825322
Biological Process	GO:0006105	8	succinate metabolic process	2.78	0.00209019	A0A5G2Q7D7	621	K	14.579	0.00224644	Up	Succinate dehydrogenase [ubiquinone] flavoprotein subunit, mitochondrial OS=Sus scrofa OX=9823 GN=SDHA PE=1 SV=1	SDHA	1	2.22594e-05	201.08	2	TGK(1)VSLEYRPVIDK	-0.32477	1.47654	2.60313	1.5352	0.228119	0.0789367	0.0780722
Biological Process	GO:0006105	8	succinate metabolic process	2.78	0.00209019	A0A5G2Q7D7	609	K	16.85	0.00329632	Up	Succinate dehydrogenase [ubiquinone] flavoprotein subunit, mitochondrial OS=Sus scrofa OX=9823 GN=SDHA PE=1 SV=1	SDHA	1	1.2097e-08	230.65	2	K(1)HTLSYVDVK	-0.039667	1.63913	1.22258	2.80215	0.208956	0.068536	0.0586466
Biological Process	GO:0006105	8	succinate metabolic process	2.78	0.00209019	A0A5G2Q7D7	601	K	18.437	0.000257543	Up	Succinate dehydrogenase [ubiquinone] flavoprotein subunit, mitochondrial OS=Sus scrofa OX=9823 GN=SDHA PE=1 SV=1	SDHA	1	0.000351671	191.78	2	K(1)PFQEHWR	-0.90598	1.51213	1.74141	1.57198		0.0718538	0.10263
Biological Process	GO:0006105	8	succinate metabolic process	2.78	0.00209019	A0A5G2Q7D7	502	K	24.072	0.000141869	Up	Succinate dehydrogenase [ubiquinone] flavoprotein subunit, mitochondrial OS=Sus scrofa OX=9823 GN=SDHA PE=1 SV=1	SDHA	1	5.56749e-115	397.21	3	LSMQK(1)SMQSHAAVFR	-0.31541	1.32691	1.79588	2.6379	0.0826575	0.0655513	0.0911046
Biological Process	GO:0006105	8	succinate metabolic process	2.78	0.00209019	A0A5G2Q7D7	535	K	28.965	0.000980542	Up	Succinate dehydrogenase [ubiquinone] flavoprotein subunit, mitochondrial OS=Sus scrofa OX=9823 GN=SDHA PE=1 SV=1	SDHA	1	7.31035e-20	259.18	2	LYGDLQHLK(1)TFDR	0.23783	1.55404	1.48144	2.76429	0.116324	0.0383939	0.0455149
Biological Process	GO:0006105	8	succinate metabolic process	2.78	0.00209019	A0A5G2Q7D7	632	K	15.588	0.0355643	Up	Succinate dehydrogenase [ubiquinone] flavoprotein subunit, mitochondrial OS=Sus scrofa OX=9823 GN=SDHA PE=1 SV=1	SDHA	1	9.03941e-143	424.08	4	VSLEYRPVIDK(1)TLNEADCATVPPAIR	0.11992	2.07028	0.951549	1.7731	0.184902		0.0201647
Biological Process	GO:0006105	8	succinate metabolic process	2.78	0.00209019	A0A5G2Q7D7	152	K	6.259	8.69518e-05	Up	Succinate dehydrogenase [ubiquinone] flavoprotein subunit, mitochondrial OS=Sus scrofa OX=9823 GN=SDHA PE=1 SV=1	SDHA	1	0.000326422	159.2	2	TEDGK(1)IYQR	-0.53423	1.49227	2.09631	1.58487	0.277814	0.29475	0.253985
Biological Process	GO:0006105	8	succinate metabolic process	2.78	0.00209019	A0A5G2Q7D7	600	K	11.974	0.00277925	Up	Succinate dehydrogenase [ubiquinone] flavoprotein subunit, mitochondrial OS=Sus scrofa OX=9823 GN=SDHA PE=1 SV=1	SDHA	1	1.26078e-07	183	3	VDEYDYSKPIQGQQK(1)K	0.4439	1.06576	1.86587	1.80467	0.155521	0.108175
Biological Process	GO:0006105	8	succinate metabolic process	2.78	0.00209019	A0A5G2Q7D7	403	K	13.601	0.0052492	Up	Succinate dehydrogenase [ubiquinone] flavoprotein subunit, mitochondrial OS=Sus scrofa OX=9823 GN=SDHA PE=1 SV=1	SDHA	1	1.52895e-09	143.67	3	EPIPVLPTVHYNMGGIPTNYK(1)GQVLR	0.20989	1.04884	1.53598	2.18155	0.151655	0.0819672
Biological Process	GO:0006105	8	succinate metabolic process	2.78	0.00209019	A0A287BA45	76	K	5.313	5.65192e-05	Up	Succinate--CoA ligase [GDP-forming] subunit beta, mitochondrial OS=Sus scrofa OX=9823 GN=SUCLG2 PE=3 SV=1	SUCLG2	1	0.00626994	103.7	2	GK(1)GVFSSGLK	-2.2376	1.6977	1.6271	1.72476	0.36339	0.32192	0.265131
Biological Process	GO:0006086	14	acetyl-CoA biosynthetic process from pyruvate	2.78	0.00209019	I3LCI2	313	K	13.059	0.000364323	Up	Pyruvate dehydrogenase E1 component subunit alpha OS=Sus scrofa OX=9823 GN=PDHA1 PE=1 SV=2	PDHA1	1	4.7682e-05	200.93	2	SK(1)SDPIMLLK(1)DR	-0.73938	1.98833	2.05998	1.5249	0.20686	0.115592	0.104335
Biological Process	GO:0006086	14	acetyl-CoA biosynthetic process from pyruvate	2.78	0.00209019	I3LCI2	277	K	5.209	0.00236988	Up	Pyruvate dehydrogenase E1 component subunit alpha OS=Sus scrofa OX=9823 GN=PDHA1 PE=1 SV=2	PDHA1	1	2.82417e-14	251.03	2	SGK(1)GPILMELQTYR	2.0211	1.31828	1.80506	1.30939		0.244799	0.322474
Biological Process	GO:0006086	14	acetyl-CoA biosynthetic process from pyruvate	2.78	0.00209019	A0A5G2QPK6	158	K	21.78	0.00019812	Up	Dihydrolipoyl dehydrogenase OS=Sus scrofa OX=9823 GN=DLD PE=1 SV=1	DLD	1	9.13913e-100	377.19	2	NQVTATK(1)ADGSTEVINTK	-0.156	1.61789	2.19801	1.92072	0.121481	0.0855181	0.0563852
Biological Process	GO:0006086	14	acetyl-CoA biosynthetic process from pyruvate	2.78	0.00209019	A0A5G2QPK6	119	K	12.123	0.00472041	Up	Dihydrolipoyl dehydrogenase OS=Sus scrofa OX=9823 GN=DLD PE=1 SV=1	DLD	1	9.06167e-05	179.1	2	MMEQK(1)SNAVK	-0.32445	1.39617	0.839096	3.30751	0.181401	0.130613	0.145213
Biological Process	GO:0006086	14	acetyl-CoA biosynthetic process from pyruvate	2.78	0.00209019	A0A5G2QPK6	124	K	11.949	0.0040856	Up	Dihydrolipoyl dehydrogenase OS=Sus scrofa OX=9823 GN=DLD PE=1 SV=1	DLD	1	1.49524e-09	167.14	3	SNAVK(1)ALTGGIAHLFK(1)QNK	-0.511	2.07125	0.955968	1.70857	0.123067	0.141145
Biological Process	GO:0006086	14	acetyl-CoA biosynthetic process from pyruvate	2.78	0.00209019	A0A5G2QPK6	402	K	2.117	0.0256796	Up	Dihydrolipoyl dehydrogenase OS=Sus scrofa OX=9823 GN=DLD PE=1 SV=1	DLD	1	6.03025e-06	209.19	2	SEEQLK(1)EEGIEYK	0.28517	1.32037	1.83202	0.922558	0.625911	0.712405	0.586733
Biological Process	GO:0006086	14	acetyl-CoA biosynthetic process from pyruvate	2.78	0.00209019	A0A5G2QSG9	137	K	31.739	0.00077276	Up	Dihydrolipoamide acetyltransferase component of pyruvate dehydrogenase complex OS=Sus scrofa OX=9823 GN=PDHX PE=1 SV=1	PDHX	1	2.03991e-20	220.6	2	LGSLIGLLVEEGEDWK(1)HVEIPK	0.30876	1.78794	2.60606	1.42273	0.0933109	0.0290634	0.0608926
Biological Process	GO:0006086	14	acetyl-CoA biosynthetic process from pyruvate	2.78	0.00209019	A0A5G2QSG9	311	K	11.655	0.000159381	Up	Dihydrolipoamide acetyltransferase component of pyruvate dehydrogenase complex OS=Sus scrofa OX=9823 GN=PDHX PE=1 SV=1	PDHX	1	1.62774e-104	382.95	4	STIPHAYATADCDLGAVLK(1)VR	-1.6514	1.89385	1.45841	2.17363	0.200507	0.146317	0.127292
Biological Process	GO:0006086	14	acetyl-CoA biosynthetic process from pyruvate	2.78	0.00209019	A0A5G2QSG9	191	K	20.177	0.000113065	Up	Dihydrolipoamide acetyltransferase component of pyruvate dehydrogenase complex OS=Sus scrofa OX=9823 GN=PDHX PE=1 SV=1	PDHX	1	4.28436e-139	427.61	3	NILEK(1)HALDANQGTATGPR	0.1433	1.54938	2.28695	1.88034	0.124763	0.0705528	0.0880149
Biological Process	GO:0006086	14	acetyl-CoA biosynthetic process from pyruvate	2.78	0.00209019	A0A5G2QSG9	170	K	7.66	0.00876038	Up	Dihydrolipoamide acetyltransferase component of pyruvate dehydrogenase complex OS=Sus scrofa OX=9823 GN=PDHX PE=1 SV=1	PDHX	1	0.00244504	75.533	3	PSVPPPPSPQPQISTPVK(1)K	0.24889		2.09625	1.44186	0.238889		0.223003
Biological Process	GO:0006086	14	acetyl-CoA biosynthetic process from pyruvate	2.78	0.00209019	A0A5G2R718	34	K	6.023	0.0316931	Up	Pyruvate dehydrogenase E1 component subunit beta OS=Sus scrofa OX=9823 GN=PDHB PE=1 SV=1	PDHB	1	1.04594e-20	167.61	4	DAINQGMDEELERDEK(1)VFLLGEEVAQYDGAYK	-0.31808	1.03207	2.48971	0.97998	0.326682		0.171565
Biological Process	GO:0006086	14	acetyl-CoA biosynthetic process from pyruvate	2.78	0.00209019	A0A5G2R718	50	K	6.433	0.000338382	Up	Pyruvate dehydrogenase E1 component subunit beta OS=Sus scrofa OX=9823 GN=PDHB PE=1 SV=1	PDHB	1	2.1295e-55	321.67	3	VFLLGEEVAQYDGAYK(1)VSR	-0.11923	1.30726	1.5305	1.69276	0.241922	0.227567
Biological Process	GO:0006086	14	acetyl-CoA biosynthetic process from pyruvate	2.78	0.00209019	A0A5G2R718	336	K	25.703	0.000583753	Up	Pyruvate dehydrogenase E1 component subunit beta OS=Sus scrofa OX=9823 GN=PDHB PE=1 SV=1	PDHB	1	0.0255332	92.307	3	ILEDNSVPQVK(1)DIIFAIK(1)K	0.31701	1.47854	1.75327	2.5435	0.122807	0.0521125	0.0497732
Biological Process	GO:0006086	14	acetyl-CoA biosynthetic process from pyruvate	2.78	0.00209019	A0A5G2R718	170	K	11.034	0.000616898	Up	Pyruvate dehydrogenase E1 component subunit beta OS=Sus scrofa OX=9823 GN=PDHB PE=1 SV=1	PDHB	1	0.00690861	120.65	2	GLIK(1)SAIR	-0.50635	1.84458	1.33623	2.32059	0.233349	0.133349	0.131903
Biological Process	GO:0006086	14	acetyl-CoA biosynthetic process from pyruvate	2.78	0.00209019	A0A5G2R718	240	K	6.879	0.0205121	Up	Pyruvate dehydrogenase E1 component subunit beta OS=Sus scrofa OX=9823 GN=PDHB PE=1 SV=1	PDHB	1	2.61644e-25	205.84	4	PVGHCLEAATVLSK(1)EGIECEVINMR	-0.21928	1.99621	1.82199	0.740027	0.215947		0.22583
Biological Process	GO:0006086	14	acetyl-CoA biosynthetic process from pyruvate	2.78	0.00209019	A0A5G2R718	166	K	14.707	0.00444135	Up	Pyruvate dehydrogenase E1 component subunit beta OS=Sus scrofa OX=9823 GN=PDHB PE=1 SV=1	PDHB	1	8.42777e-07	162.68	3	VVSPWSSEDAK(1)GLIK	-0.13568	1.72959		2.80764	0.214388	0.151972	0.0964119
Biological Process	GO:0006086	14	acetyl-CoA biosynthetic process from pyruvate	2.78	0.00209019	F1RPU8	19	K	17.711	0.000499448	Up	Mitochondrial pyruvate carrier OS=Sus scrofa OX=9823 GN=MPC2 PE=1 SV=4	MPC2	1	0.000269522	140.24	2	VLDK(1)VELLLPEK	-0.36674	1.5011	1.40448	2.77375	0.136634	0.108465	0.0755768
Biological Process	GO:0006086	14	acetyl-CoA biosynthetic process from pyruvate	2.78	0.00209019	I3LCI2	244	K	14.326	7.06486e-05	Up	Pyruvate dehydrogenase E1 component subunit alpha OS=Sus scrofa OX=9823 GN=PDHA1 PE=1 SV=2	PDHA1	1	0.000402517	172.21	2	AAASTDYYK(1)R	0.24715	2.1465	1.89941	1.56258	0.162102	0.104595	0.124807
Biological Process	GO:0006086	14	acetyl-CoA biosynthetic process from pyruvate	2.78	0.00209019	I3LCI2	83	K	2.468	0.0111998	Up	Pyruvate dehydrogenase E1 component subunit alpha OS=Sus scrofa OX=9823 GN=PDHA1 PE=1 SV=2	PDHA1	1	2.11455e-13	245.15	3	RMELK(1)ADQLYK(1)QK	-0.75819	1.26937	1.80276	1.19758	0.410631	0.633634	0.686031
Biological Process	GO:0006086	14	acetyl-CoA biosynthetic process from pyruvate	2.78	0.00209019	I3LCI2	85	K	9.005	0.000162366	Up	Pyruvate dehydrogenase E1 component subunit alpha OS=Sus scrofa OX=9823 GN=PDHA1 PE=1 SV=2	PDHA1	1	0.000436708	138.22	2	ADQLYK(1)QK(1)IIR	-0.94509	1.44813	1.61689	2.33528	0.182028	0.226178	0.19149
Biological Process	GO:0006086	14	acetyl-CoA biosynthetic process from pyruvate	2.78	0.00209019	I3LCI2	149	K	30.357	0.00264492	Up	Pyruvate dehydrogenase E1 component subunit alpha OS=Sus scrofa OX=9823 GN=PDHA1 PE=1 SV=2	PDHA1	1	0.000497327	166.66	2	GK(1)GGSMHMYAK	-0.26957	1.20887	1.1745	2.50919		0.0416124	0.0658308
Biological Process	GO:0006086	14	acetyl-CoA biosynthetic process from pyruvate	2.78	0.00209019	I3LCI2	77	K	7.793	0.000756203	Up	Pyruvate dehydrogenase E1 component subunit alpha OS=Sus scrofa OX=9823 GN=PDHA1 PE=1 SV=2	PDHA1	1	2.11455e-13	245.15	3	RMELK(1)ADQLYK(1)QK	-0.75819	1.64932	1.96265	1.70571	0.290556	0.25052	0.141251
Biological Process	GO:0006086	14	acetyl-CoA biosynthetic process from pyruvate	2.78	0.00209019	I3LCI2	321	K	7.822	0.000142572	Up	Pyruvate dehydrogenase E1 component subunit alpha OS=Sus scrofa OX=9823 GN=PDHA1 PE=1 SV=2	PDHA1	1	7.16903e-05	200.93	2	SK(1)SDPIMLLK(1)DR	-0.73938	1.52532	2.28207	1.51246	0.220389	0.247774	0.211984
Biological Process	GO:0006086	14	acetyl-CoA biosynthetic process from pyruvate	2.78	0.00209019	A0A5G2QPK6	259	K	4.306	0.00171738	Up	Dihydrolipoyl dehydrogenase OS=Sus scrofa OX=9823 GN=DLD PE=1 SV=1	DLD	1	0.000942284	135.83	2	ILQK(1)QGFK(1)FK	-0.29711	1.38859	1.8666	1.61407	0.515362	0.282005	0.333363
Biological Process	GO:0090407	6	organophosphate biosynthetic process	1.41	0.00198558	I3LCI2	244	K	14.326	7.06486e-05	Up	Pyruvate dehydrogenase E1 component subunit alpha OS=Sus scrofa OX=9823 GN=PDHA1 PE=1 SV=2	PDHA1	1	0.000402517	172.21	2	AAASTDYYK(1)R	0.24715	2.1465	1.89941	1.56258	0.162102	0.104595	0.124807
Biological Process	GO:0044703	4	multi-organism reproductive process	1.33	0.0022856	A0A5G2QPK6	259	K	4.306	0.00171738	Up	Dihydrolipoyl dehydrogenase OS=Sus scrofa OX=9823 GN=DLD PE=1 SV=1	DLD	1	0.000942284	135.83	2	ILQK(1)QGFK(1)FK	-0.29711	1.38859	1.8666	1.61407	0.515362	0.282005	0.333363
Biological Process	GO:0044703	4	multi-organism reproductive process	1.33	0.0022856	A0A5G2QPK6	158	K	21.78	0.00019812	Up	Dihydrolipoyl dehydrogenase OS=Sus scrofa OX=9823 GN=DLD PE=1 SV=1	DLD	1	9.13913e-100	377.19	2	NQVTATK(1)ADGSTEVINTK	-0.156	1.61789	2.19801	1.92072	0.121481	0.0855181	0.0563852
Biological Process	GO:1902600	9	proton transmembrane transport	1.79	0.00231251	P13618	67	K	3.633	0.0252941	Up	ATP synthase-coupling factor 6, mitochondrial OS=Sus scrofa OX=9823 GN=ATP5PF PE=1 SV=1	ATP5PF	0.998527	0.0114483	58.272	3	ADMNTFPNFTFEDPK(0.999)FEAVEK(0.001)PQS	-1.2517		1.79893	1.33762		0.494988	0.368457
Biological Process	GO:1902600	9	proton transmembrane transport	1.79	0.00231251	P13618	47	K	10.17	0.00150594	Up	ATP synthase-coupling factor 6, mitochondrial OS=Sus scrofa OX=9823 GN=ATP5PF PE=1 SV=1	ATP5PF	1	0.0146676	123.99	2	LK(1)QMYGK	0.028819	1.45186	1.68741	2.32359	0.277685	0.108966	0.150486
Biological Process	GO:1902600	9	proton transmembrane transport	1.79	0.00231251	F1RPS8	517	K	2.54	0.00416139	Up	ATP synthase subunit alpha OS=Sus scrofa OX=9823 GN=ATP5F1A PE=1 SV=3	ATP5F1A	1	5.69356e-05	170.89	2	ADGK(1)ISEETDAK(1)LK	0.41523	1.3169	1.58469	1.4034	0.745737	0.456061	0.493214
Biological Process	GO:1902600	9	proton transmembrane transport	1.79	0.00231251	F1RPS8	525	K	12.748	0.000317467	Up	ATP synthase subunit alpha OS=Sus scrofa OX=9823 GN=ATP5F1A PE=1 SV=3	ATP5F1A	1	5.69356e-05	142.12	2	ISEETDAK(1)LK	0.37504	1.73268	1.85668	1.9742	0.205298	0.135448	0.0956943
Biological Process	GO:1902600	9	proton transmembrane transport	1.79	0.00231251	F1RPS8	527	K	12.568	0.00267292	Up	ATP synthase subunit alpha OS=Sus scrofa OX=9823 GN=ATP5F1A PE=1 SV=3	ATP5F1A	1	0.000536066	124.1	2	LK(1)EIVTNFLAGFEA	0.10938	1.50475	3.13778	0.915246	0.146854	0.133107	0.162262
Biological Process	GO:1902600	9	proton transmembrane transport	1.79	0.00231251	F1RPS8	291	K	21.279	0.000154629	Up	ATP synthase subunit alpha OS=Sus scrofa OX=9823 GN=ATP5F1A PE=1 SV=3	ATP5F1A	1	2.91638e-65	349.01	2	DNGK(1)HALIIYDDLSK	-0.018784	1.55562	1.62106	2.55401	0.118627	0.0742585	0.0764279
Biological Process	GO:1902600	9	proton transmembrane transport	1.79	0.00231251	F1RPS8	302	K	3.929	0.0151285	Up	ATP synthase subunit alpha OS=Sus scrofa OX=9823 GN=ATP5F1A PE=1 SV=3	ATP5F1A	1	5.95734e-83	361.51	2	HALIIYDDLSK(1)QAVAYR	-0.44899	1.89732	0.948302	1.93722	0.494625	0.484684	0.237856
Biological Process	GO:1902600	9	proton transmembrane transport	1.79	0.00231251	F1RPS8	118	K	12.854	0.00115534	Up	ATP synthase subunit alpha OS=Sus scrofa OX=9823 GN=ATP5F1A PE=1 SV=3	ATP5F1A	1	0.019564	107.67	2	LIK(1)EGDIVK(1)R	-0.44145	1.49119	1.83265	2.24306	0.208517	0.147838	0.0767422
Biological Process	GO:1902600	9	proton transmembrane transport	1.79	0.00231251	F1RPS8	225	K	13.364	0.000649063	Up	ATP synthase subunit alpha OS=Sus scrofa OX=9823 GN=ATP5F1A PE=1 SV=3	ATP5F1A	1	0.000260482	187	2	FNDGTDEK(1)K	1.2035	1.90015	1.87754	1.8046	0.198672	0.0773178	0.141718
Biological Process	GO:1902600	9	proton transmembrane transport	1.79	0.00231251	A0A287A9I8	173	K	34.711	0.0006569	Up	ATP synthase subunit gamma OS=Sus scrofa OX=9823 GN=ATP5F1C PE=1 SV=2	ATP5F1C	1	2.26454e-42	229.71	2	SVISYK(1)TEEK	-0.14883	2.0806	1.84087	1.91051	0.102915	0.0333116	0.0317885
Biological Process	GO:1902600	9	proton transmembrane transport	1.79	0.00231251	F1RPS8	153	K	11.08	0.000458136	Up	ATP synthase subunit alpha OS=Sus scrofa OX=9823 GN=ATP5F1A PE=1 SV=3	ATP5F1A	1	0.00107516	163.67	3	VVDALGNAIDGK(1)GPIGSK(1)TR	0.46658	1.52481	1.77889	2.1996	0.234481	0.145184	0.117033
Biological Process	GO:1902600	9	proton transmembrane transport	1.79	0.00231251	F1RPS8	492	K	6.016	0.000202898	Up	ATP synthase subunit alpha OS=Sus scrofa OX=9823 GN=ATP5F1A PE=1 SV=3	ATP5F1A	1	9.77516e-19	211.96	4	ITK(1)FENAFLSHVISQHQALLGK(1)IR	-0.80662	1.4855	1.9846	1.67475	0.344308	0.235519	0.275315
Biological Process	GO:1902600	9	proton transmembrane transport	1.79	0.00231251	F1RPS8	204	K	13.971	0.00822167	Up	ATP synthase subunit alpha OS=Sus scrofa OX=9823 GN=ATP5F1A PE=1 SV=3	ATP5F1A	1	2.63052e-08	207.27	2	QTGK(1)TSIAIDTIINQK	-0.20179	1.65896	0.938535	3.00173	0.259749	0.0579558	0.0830745
Biological Process	GO:1902600	9	proton transmembrane transport	1.79	0.00231251	F1RPS8	216	K	10.857	0.000844146	Up	ATP synthase subunit alpha OS=Sus scrofa OX=9823 GN=ATP5F1A PE=1 SV=3	ATP5F1A	1	3.16164e-20	267.45	2	TSIAIDTIINQK(1)R	0.36045	1.42636	1.75603	2.31158	0.248026	0.143629	0.114375
Biological Process	GO:1902600	9	proton transmembrane transport	1.79	0.00231251	F1RPS8	247	K	11.878	0.00410941	Up	ATP synthase subunit alpha OS=Sus scrofa OX=9823 GN=ATP5F1A PE=1 SV=3	ATP5F1A	1	4.16252e-05	198.73	2	STVAQLVK(1)R	0.1271		1.95336	2.48603	0.278668	0.154268	0.127669
Biological Process	GO:1902600	9	proton transmembrane transport	1.79	0.00231251	F1RPS8	147	K	13.599	0.000386044	Up	ATP synthase subunit alpha OS=Sus scrofa OX=9823 GN=ATP5F1A PE=1 SV=3	ATP5F1A	1	1.42079e-43	303.02	3	VVDALGNAIDGK(1)GPIGSK(1)TR	0.46658	1.44201	1.54333	1.781		0.135972	0.0976911
Biological Process	GO:1902600	9	proton transmembrane transport	1.79	0.00231251	A0A287AZF9	311	K	6.232	0.00125867	Up	Cytochrome c1 OS=Sus scrofa OX=9823 GN=CYC1 PE=1 SV=1	CYC1	1	0.0142064	126.52	2	HK(1)WSVLK	0.10783	2.0085	2.0215		0.404383	0.286648	0.278968
Biological Process	GO:1902600	9	proton transmembrane transport	1.79	0.00231251	A0A287AZF9	316	K	11.245	0.00166975	Up	Cytochrome c1 OS=Sus scrofa OX=9823 GN=CYC1 PE=1 SV=1	CYC1	1	0.0166971	120.92	2	WSVLK(1)SR	-0.02028	1.62946	1.48939	2.39115	0.264539	0.0977829	0.127682
Biological Process	GO:1902600	9	proton transmembrane transport	1.79	0.00231251	A0A2C9F3A3	162	K	13.487	0.000396689	Up	ATP synthase peripheral stalk subunit OSCP OS=Sus scrofa OX=9823 GN=ATP5PO PE=3 SV=1	ATP5PO	1	0.00154211	131.44	2	TVLK(1)SFLSK	0.69706	2.08186	1.54456	1.95942	0.198325	0.123964	0.0918761
Biological Process	GO:1902600	9	proton transmembrane transport	1.79	0.00231251	A0A2C9F3A3	54	K	3.295	0.000528022	Up	ATP synthase peripheral stalk subunit OSCP OS=Sus scrofa OX=9823 GN=ATP5PO PE=3 SV=1	ATP5PO	1	9.69164e-06	204.79	2	QNK(1)LEQVEK	2.6593	1.39422	1.54617	1.66272	0.562289	0.390779	0.443826
Biological Process	GO:1902600	9	proton transmembrane transport	1.79	0.00231251	F1RPS8	489	K	4.906	0.00358561	Up	ATP synthase subunit alpha OS=Sus scrofa OX=9823 GN=ATP5F1A PE=1 SV=3	ATP5F1A	1	0.0159255	106.11	2	LEPSK(1)ITK	-0.29687	1.34368	1.9286	1.71175	0.499739	0.301569	0.214658
Biological Process	GO:1902600	9	proton transmembrane transport	1.79	0.00231251	A0A287A9I8	91	K	9.588	0.00257895	Up	ATP synthase subunit gamma OS=Sus scrofa OX=9823 GN=ATP5F1C PE=1 SV=2	ATP5F1C	1	1.56419e-10	238.92	2	QIK(1)SEVANLTAAGK	0.24297	1.92458	1.30582	2.20294	0.303776	0.158648	0.104231
Biological Process	GO:1902600	9	proton transmembrane transport	1.79	0.00231251	A0A287A9I8	238	K	4.294	0.0366704	Up	ATP synthase subunit gamma OS=Sus scrofa OX=9823 GN=ATP5F1C PE=1 SV=2	ATP5F1C	1	2.4141e-43	302.28	2	MTAMDNASK(1)NASEMIDK	-0.81589	1.30779	1.17205	1.84815	0.500644	0.171365
Biological Process	GO:1902600	9	proton transmembrane transport	1.79	0.00231251	A0A287A9I8	66	K	18.036	0.000416059	Up	ATP synthase subunit gamma OS=Sus scrofa OX=9823 GN=ATP5F1C PE=1 SV=2	ATP5F1C	1	4.48544e-13	244.24	3	K(1)HLIIGVSSDR	0.12083	1.66008	1.5812	2.44353	0.147671	0.101623	0.0658968
Biological Process	GO:0044703	4	multi-organism reproductive process	1.33	0.0022856	I3LCA2	152	K	4.52	0.00847498	Up	CCT-theta OS=Sus scrofa OX=9823 GN=CCT8 PE=1 SV=2	CCT8	1	4.33296e-11	169.92	3	AHEILPDLVCCSAK(1)NLR	-0.47273	0.967164	2.03522	1.91061	0.475841	0.241631	0.369536
Biological Process	GO:0044703	4	multi-organism reproductive process	1.33	0.0022856	I3LT05	23	K	15.456	0.000184453	Up	Ropporin-1B isoform X1 OS=Sus scrofa OX=9823 GN=ROPN1 PE=4 SV=2	ROPN1	1	0.00424878	130.64	2	QFTK(1)AAIR	-0.48019	1.32769	2.03493	2.27278	0.147428	0.0962685	0.120903
Biological Process	GO:0044703	4	multi-organism reproductive process	1.33	0.0022856	I3LN92	88	K	6.971	0.00792638	Up	NME/NM23 family member 5 OS=Sus scrofa OX=9823 GN=NME5 PE=3 SV=1	NME5	1	0.00335934	138.4	2	HK(1)AISYWK	-0.27729	1.23509	1.25389	2.75826	0.408931	0.189947	0.153881
Biological Process	GO:0044703	4	multi-organism reproductive process	1.33	0.0022856	I3LN92	194	K	12.886	0.00756898	Up	NME/NM23 family member 5 OS=Sus scrofa OX=9823 GN=NME5 PE=3 SV=1	NME5	0.99455	3.07673e-06	116.39	4	QKPADPLIWLADWLLK(0.995)NNPNK(0.005)PK	-0.372	0.987814	1.3657	2.40053	0.155627		0.090329
Biological Process	GO:0044703	4	multi-organism reproductive process	1.33	0.0022856	P36968	145	K	65.375	0.00215248	Up	Phospholipid hydroperoxide glutathione peroxidase OS=Sus scrofa OX=9823 GN=GPX4 PE=1 SV=3	GPX4	1	5.54501e-08	205.72	2	ICVNGDDAHPLWK(1)WMK	-1.7781	1.23286	1.31236	2.40431		0.0149464	0.0355269
Biological Process	GO:0044703	4	multi-organism reproductive process	1.33	0.0022856	P36968	47	K	14.475	0.000833488	Up	Phospholipid hydroperoxide glutathione peroxidase OS=Sus scrofa OX=9823 GN=GPX4 PE=1 SV=3	GPX4	1	5.95533e-12	192.98	4	SMHEFSAK(1)DIDGHMVNLDK	-0.2114	2.08922	2.32434	1.19871	0.0923762	0.10795	0.187402
Biological Process	GO:0044703	4	multi-organism reproductive process	1.33	0.0022856	Q8MI70	63	K	6.962	0.00627962	Up	Epididymal secretory protein E3 (Fragment) OS=Sus scrofa OX=9823 GN=E3 PE=1 SV=1	E3	1	6.83075e-15	257.02	2	DK(1)NNHLFVYTLWQK	0.11127	0.942811	1.46969	2.83389	0.285348	0.181467	0.286798
Biological Process	GO:0044703	4	multi-organism reproductive process	1.33	0.0022856	Q8MI70	128	K	8.93	0.016541	Up	Epididymal secretory protein E3 (Fragment) OS=Sus scrofa OX=9823 GN=E3 PE=1 SV=1	E3	1	1.82635e-18	206.86	3	SYSYIEFHCSK(1)NGYVDSIEDMR	7.6086e-05	1.16989	1.46382	2.7621	0.100515	0.434799	0.0688875
Biological Process	GO:0044703	4	multi-organism reproductive process	1.33	0.0022856	Q8MI70	47	K	1.985	0.0209833	Up	Epididymal secretory protein E3 (Fragment) OS=Sus scrofa OX=9823 GN=E3 PE=1 SV=1	E3	1	0.000451901	108.23	4	QHHLNTNWEFSK(1)YR	0.39774	1.16429	1.39208	1.43327	0.912424	0.608561	0.489376
Biological Process	GO:1902600	9	proton transmembrane transport	1.79	0.00231251	A0A286ZX04	118	K	3.844	0.0120218	Up	ATP synthase subunit s, mitochondrial OS=Sus scrofa OX=9823 GN=DMAC2L PE=1 SV=1	DMAC2L	1	2.52744e-05	139.42	3	FCK(1)CHYIEDYCLER	-0.82746	1.11346	2.2252	1.4226	0.524335	0.468113	0.2463
Biological Process	GO:1902600	9	proton transmembrane transport	1.79	0.00231251	A0A5G2RC13	175	K	9.334	0.000674368	Up	Stomatin like 2 OS=Sus scrofa OX=9823 GN=STOML2 PE=1 SV=1	STOML2	1	0.000436852	132.32	2	ESAINVAEGK(1)K	1.0999	1.36438	2.53313	1.52188	0.216881	0.217543	0.146186
Biological Process	GO:1902600	9	proton transmembrane transport	1.79	0.00231251	A0A5G2R4S0	101	K	8.453	0.000592505	Up	ATP synthase subunit b OS=Sus scrofa OX=9823 GN=ATP5PB PE=1 SV=1	ATP5PB	1	0.000182826	187	2	SQQALVQK(1)R	1.5433	1.3181	2.33146	1.71573	0.271491	0.170619	0.192593
Biological Process	GO:1902600	9	proton transmembrane transport	1.79	0.00231251	A0A287A2Y4	72	K	7.357	0.00117247	Up	ATP synthase subunit d, mitochondrial OS=Sus scrofa OX=9823 GN=ATP5PD PE=1 SV=1	ATP5PD	1	0.000261988	138.98	2	ATVAK(1)AGLVDDFEK(1)K	0.28055	1.91653	1.58483	1.78071	0.363496	0.166587	0.187844
Biological Process	GO:1902600	9	proton transmembrane transport	1.79	0.00231251	A0A287A2Y4	32	K	2.864	0.02406	Up	ATP synthase subunit d, mitochondrial OS=Sus scrofa OX=9823 GN=ATP5PD PE=1 SV=1	ATP5PD	1	1.40463e-30	286.61	3	AIANSLK(1)SWNETLSTR	-0.32778	1.11065	1.46278	1.87393	0.688397	0.284448	0.579791
Biological Process	GO:1902600	9	proton transmembrane transport	1.79	0.00231251	A0A287A2Y4	63	K	1.771	0.0320767	Up	ATP synthase subunit d, mitochondrial OS=Sus scrofa OX=9823 GN=ATP5PD PE=1 SV=1	ATP5PD	1	1.91006e-05	177.1	2	ATVAK(1)AGLVDDFEK(1)K	0.28055	1.16394	1.45512	1.21576	0.967286	0.659947	0.537943
Biological Process	GO:1902600	9	proton transmembrane transport	1.79	0.00231251	A0A287A2Y4	148	K	6.912	0.00528176	Up	ATP synthase subunit d, mitochondrial OS=Sus scrofa OX=9823 GN=ATP5PD PE=1 SV=1	ATP5PD	1	7.26341e-05	145.29	3	K(1)K(1)YPYWPHRPIESL	0.044469	1.10346	1.89271	1.56397	0.26881	0.171044
Biological Process	GO:1902600	9	proton transmembrane transport	1.79	0.00231251	A0A287A2Y4	149	K	15.105	0.000870008	Up	ATP synthase subunit d, mitochondrial OS=Sus scrofa OX=9823 GN=ATP5PD PE=1 SV=1	ATP5PD	1	7.26341e-05	193.96	2	K(1)YPYWPHRPIESL	0.72367	1.63458	2.00677	1.98609	0.20609	0.0759565	0.0905098
Biological Process	GO:1902600	9	proton transmembrane transport	1.79	0.00231251	A0A287A2Y4	123	K	7.854	0.00734106	Up	ATP synthase subunit d, mitochondrial OS=Sus scrofa OX=9823 GN=ATP5PD PE=1 SV=1	ATP5PD	1	5.87873e-09	158.17	3	MK(1)NIIPFDQMTIEDLNEVFPETK	0.0019063	1.2836	1.58666	2.45207	0.412609	0.113884	0.151176
Biological Process	GO:1902600	9	proton transmembrane transport	1.79	0.00231251	A0A287A2Y4	144	K	10.705	0.00508917	Up	ATP synthase subunit d, mitochondrial OS=Sus scrofa OX=9823 GN=ATP5PD PE=1 SV=1	ATP5PD	1	9.44138e-18	188.58	3	NIIPFDQMTIEDLNEVFPETK(1)LDK	0.53789	1.96876	2.12742	1.39122	0.324482	0.114467	0.0736532
Biological Process	GO:1902600	9	proton transmembrane transport	1.79	0.00231251	A0A287A2Y4	99	K	6.393	0.00356443	Up	ATP synthase subunit d, mitochondrial OS=Sus scrofa OX=9823 GN=ATP5PD PE=1 SV=1	ATP5PD	1	6.46991e-80	355.67	2	YTALVDAEEQEDVK(1)R	2.9863	1.64586	1.67357	1.86901	0.455108	0.164364	0.192083
Biological Process	GO:1902600	9	proton transmembrane transport	1.79	0.00231251	A0A5G2QK91	30	K	12.153	0.000286857	Up	ATP synthase subunit OS=Sus scrofa OX=9823 GN=ATP5MG PE=1 SV=1	ATP5MG	1	1.84407e-10	130.51	4	LATFWHYAK(1)VELVPPTPAEIPTAIQSLK	0.34295	1.59495	1.72394	2.22495	0.192848	0.160486	0.10283
Biological Process	GO:1902600	9	proton transmembrane transport	1.79	0.00231251	A0A2C9F3A3	90	K	7.594	0.00189092	Up	ATP synthase peripheral stalk subunit OSCP OS=Sus scrofa OX=9823 GN=ATP5PO PE=3 SV=1	ATP5PO	1	0.00185402	121.73	2	VK(1)SLSDMTAK	-0.08359	1.64903	1.52195	2.13086	0.366611	0.153366	0.178175
Biological Process	GO:0044703	4	multi-organism reproductive process	1.33	0.0022856	I3L8L8	847	K	10.904	0.000409895	Up	Sodium/potassium-transporting ATPase subunit alpha OS=Sus scrofa OX=9823 GN=LOC100157711 PE=1 SV=3	LOC100157711	1	5.63851e-20	273.79	2	NPK(1)TDNLVNHR	-1.1891	2.11753	1.29801	2.08042	0.172693	0.12391	0.207434
Biological Process	GO:1902600	9	proton transmembrane transport	1.79	0.00231251	A0A2C9F3A3	199	K	3.734	0.00703002	Up	ATP synthase peripheral stalk subunit OSCP OS=Sus scrofa OX=9823 GN=ATP5PO PE=3 SV=1	ATP5PO	1	0.00784711	107.57	2	YVDMSAK(1)TK	-0.84839		1.96565	1.60134	0.602422	0.465235	0.365349
Biological Process	GO:1902600	9	proton transmembrane transport	1.79	0.00231251	F1SQT3	293	K	20.059	0.00036527	Up	Phosphate carrier protein, mitochondrial OS=Sus scrofa OX=9823 GN=SLC25A3 PE=1 SV=2	SLC25A3	1	0.000307839	161.63	2	EK(1)GSSASQVLR	-0.37406	1.65855	1.6399	1.54072		0.0630101	0.0978223
Biological Process	GO:0042407	9	cristae formation	2.09	0.00232596	A0A287A2Y4	123	K	7.854	0.00734106	Up	ATP synthase subunit d, mitochondrial OS=Sus scrofa OX=9823 GN=ATP5PD PE=1 SV=1	ATP5PD	1	5.87873e-09	158.17	3	MK(1)NIIPFDQMTIEDLNEVFPETK	0.0019063	1.2836	1.58666	2.45207	0.412609	0.113884	0.151176
Biological Process	GO:0042407	9	cristae formation	2.09	0.00232596	A0A287A2Y4	144	K	10.705	0.00508917	Up	ATP synthase subunit d, mitochondrial OS=Sus scrofa OX=9823 GN=ATP5PD PE=1 SV=1	ATP5PD	1	9.44138e-18	188.58	3	NIIPFDQMTIEDLNEVFPETK(1)LDK	0.53789	1.96876	2.12742	1.39122	0.324482	0.114467	0.0736532
Biological Process	GO:0042407	9	cristae formation	2.09	0.00232596	A0A287A2Y4	99	K	6.393	0.00356443	Up	ATP synthase subunit d, mitochondrial OS=Sus scrofa OX=9823 GN=ATP5PD PE=1 SV=1	ATP5PD	1	6.46991e-80	355.67	2	YTALVDAEEQEDVK(1)R	2.9863	1.64586	1.67357	1.86901	0.455108	0.164364	0.192083
Biological Process	GO:0042407	9	cristae formation	2.09	0.00232596	A0A5G2QK91	30	K	12.153	0.000286857	Up	ATP synthase subunit OS=Sus scrofa OX=9823 GN=ATP5MG PE=1 SV=1	ATP5MG	1	1.84407e-10	130.51	4	LATFWHYAK(1)VELVPPTPAEIPTAIQSLK	0.34295	1.59495	1.72394	2.22495	0.192848	0.160486	0.10283
Biological Process	GO:0042407	9	cristae formation	2.09	0.00232596	A0A287A9I8	66	K	18.036	0.000416059	Up	ATP synthase subunit gamma OS=Sus scrofa OX=9823 GN=ATP5F1C PE=1 SV=2	ATP5F1C	1	4.48544e-13	244.24	3	K(1)HLIIGVSSDR	0.12083	1.66008	1.5812	2.44353	0.147671	0.101623	0.0658968
Biological Process	GO:0042407	9	cristae formation	2.09	0.00232596	A0A287A9I8	238	K	4.294	0.0366704	Up	ATP synthase subunit gamma OS=Sus scrofa OX=9823 GN=ATP5F1C PE=1 SV=2	ATP5F1C	1	2.4141e-43	302.28	2	MTAMDNASK(1)NASEMIDK	-0.81589	1.30779	1.17205	1.84815	0.500644	0.171365
Biological Process	GO:0042407	9	cristae formation	2.09	0.00232596	A0A287A9I8	91	K	9.588	0.00257895	Up	ATP synthase subunit gamma OS=Sus scrofa OX=9823 GN=ATP5F1C PE=1 SV=2	ATP5F1C	1	1.56419e-10	238.92	2	QIK(1)SEVANLTAAGK	0.24297	1.92458	1.30582	2.20294	0.303776	0.158648	0.104231
Biological Process	GO:0042407	9	cristae formation	2.09	0.00232596	A0A287A9I8	173	K	34.711	0.0006569	Up	ATP synthase subunit gamma OS=Sus scrofa OX=9823 GN=ATP5F1C PE=1 SV=2	ATP5F1C	1	2.26454e-42	229.71	2	SVISYK(1)TEEK	-0.14883	2.0806	1.84087	1.91051	0.102915	0.0333116	0.0317885
Biological Process	GO:0042407	9	cristae formation	2.09	0.00232596	P13618	67	K	3.633	0.0252941	Up	ATP synthase-coupling factor 6, mitochondrial OS=Sus scrofa OX=9823 GN=ATP5PF PE=1 SV=1	ATP5PF	0.998527	0.0114483	58.272	3	ADMNTFPNFTFEDPK(0.999)FEAVEK(0.001)PQS	-1.2517		1.79893	1.33762		0.494988	0.368457
Biological Process	GO:0042407	9	cristae formation	2.09	0.00232596	A0A287A2Y4	149	K	15.105	0.000870008	Up	ATP synthase subunit d, mitochondrial OS=Sus scrofa OX=9823 GN=ATP5PD PE=1 SV=1	ATP5PD	1	7.26341e-05	193.96	2	K(1)YPYWPHRPIESL	0.72367	1.63458	2.00677	1.98609	0.20609	0.0759565	0.0905098
Biological Process	GO:0042407	9	cristae formation	2.09	0.00232596	P13618	47	K	10.17	0.00150594	Up	ATP synthase-coupling factor 6, mitochondrial OS=Sus scrofa OX=9823 GN=ATP5PF PE=1 SV=1	ATP5PF	1	0.0146676	123.99	2	LK(1)QMYGK	0.028819	1.45186	1.68741	2.32359	0.277685	0.108966	0.150486
Biological Process	GO:0042407	9	cristae formation	2.09	0.00232596	F1RPS8	525	K	12.748	0.000317467	Up	ATP synthase subunit alpha OS=Sus scrofa OX=9823 GN=ATP5F1A PE=1 SV=3	ATP5F1A	1	5.69356e-05	142.12	2	ISEETDAK(1)LK	0.37504	1.73268	1.85668	1.9742	0.205298	0.135448	0.0956943
Biological Process	GO:0042407	9	cristae formation	2.09	0.00232596	F1RPS8	527	K	12.568	0.00267292	Up	ATP synthase subunit alpha OS=Sus scrofa OX=9823 GN=ATP5F1A PE=1 SV=3	ATP5F1A	1	0.000536066	124.1	2	LK(1)EIVTNFLAGFEA	0.10938	1.50475	3.13778	0.915246	0.146854	0.133107	0.162262
Biological Process	GO:0042407	9	cristae formation	2.09	0.00232596	F1RPS8	291	K	21.279	0.000154629	Up	ATP synthase subunit alpha OS=Sus scrofa OX=9823 GN=ATP5F1A PE=1 SV=3	ATP5F1A	1	2.91638e-65	349.01	2	DNGK(1)HALIIYDDLSK	-0.018784	1.55562	1.62106	2.55401	0.118627	0.0742585	0.0764279
Biological Process	GO:0042407	9	cristae formation	2.09	0.00232596	F1RPS8	302	K	3.929	0.0151285	Up	ATP synthase subunit alpha OS=Sus scrofa OX=9823 GN=ATP5F1A PE=1 SV=3	ATP5F1A	1	5.95734e-83	361.51	2	HALIIYDDLSK(1)QAVAYR	-0.44899	1.89732	0.948302	1.93722	0.494625	0.484684	0.237856
Biological Process	GO:0042407	9	cristae formation	2.09	0.00232596	F1RPS8	118	K	12.854	0.00115534	Up	ATP synthase subunit alpha OS=Sus scrofa OX=9823 GN=ATP5F1A PE=1 SV=3	ATP5F1A	1	0.019564	107.67	2	LIK(1)EGDIVK(1)R	-0.44145	1.49119	1.83265	2.24306	0.208517	0.147838	0.0767422
Biological Process	GO:0042407	9	cristae formation	2.09	0.00232596	F1RPS8	225	K	13.364	0.000649063	Up	ATP synthase subunit alpha OS=Sus scrofa OX=9823 GN=ATP5F1A PE=1 SV=3	ATP5F1A	1	0.000260482	187	2	FNDGTDEK(1)K	1.2035	1.90015	1.87754	1.8046	0.198672	0.0773178	0.141718
Biological Process	GO:0042407	9	cristae formation	2.09	0.00232596	F1RPS8	153	K	11.08	0.000458136	Up	ATP synthase subunit alpha OS=Sus scrofa OX=9823 GN=ATP5F1A PE=1 SV=3	ATP5F1A	1	0.00107516	163.67	3	VVDALGNAIDGK(1)GPIGSK(1)TR	0.46658	1.52481	1.77889	2.1996	0.234481	0.145184	0.117033
Biological Process	GO:0042407	9	cristae formation	2.09	0.00232596	F1RPS8	489	K	4.906	0.00358561	Up	ATP synthase subunit alpha OS=Sus scrofa OX=9823 GN=ATP5F1A PE=1 SV=3	ATP5F1A	1	0.0159255	106.11	2	LEPSK(1)ITK	-0.29687	1.34368	1.9286	1.71175	0.499739	0.301569	0.214658
Biological Process	GO:0042407	9	cristae formation	2.09	0.00232596	F1RPS8	492	K	6.016	0.000202898	Up	ATP synthase subunit alpha OS=Sus scrofa OX=9823 GN=ATP5F1A PE=1 SV=3	ATP5F1A	1	9.77516e-19	211.96	4	ITK(1)FENAFLSHVISQHQALLGK(1)IR	-0.80662	1.4855	1.9846	1.67475	0.344308	0.235519	0.275315
Biological Process	GO:0042407	9	cristae formation	2.09	0.00232596	F1RPS8	517	K	2.54	0.00416139	Up	ATP synthase subunit alpha OS=Sus scrofa OX=9823 GN=ATP5F1A PE=1 SV=3	ATP5F1A	1	5.69356e-05	170.89	2	ADGK(1)ISEETDAK(1)LK	0.41523	1.3169	1.58469	1.4034	0.745737	0.456061	0.493214
Biological Process	GO:0042407	9	cristae formation	2.09	0.00232596	A0A287A2Y4	148	K	6.912	0.00528176	Up	ATP synthase subunit d, mitochondrial OS=Sus scrofa OX=9823 GN=ATP5PD PE=1 SV=1	ATP5PD	1	7.26341e-05	145.29	3	K(1)K(1)YPYWPHRPIESL	0.044469	1.10346	1.89271	1.56397	0.26881	0.171044
Biological Process	GO:0042407	9	cristae formation	2.09	0.00232596	A0A287A2Y4	63	K	1.771	0.0320767	Up	ATP synthase subunit d, mitochondrial OS=Sus scrofa OX=9823 GN=ATP5PD PE=1 SV=1	ATP5PD	1	1.91006e-05	177.1	2	ATVAK(1)AGLVDDFEK(1)K	0.28055	1.16394	1.45512	1.21576	0.967286	0.659947	0.537943
Biological Process	GO:0042407	9	cristae formation	2.09	0.00232596	A0A287A2Y4	32	K	2.864	0.02406	Up	ATP synthase subunit d, mitochondrial OS=Sus scrofa OX=9823 GN=ATP5PD PE=1 SV=1	ATP5PD	1	1.40463e-30	286.61	3	AIANSLK(1)SWNETLSTR	-0.32778	1.11065	1.46278	1.87393	0.688397	0.284448	0.579791
Biological Process	GO:1902600	9	proton transmembrane transport	1.79	0.00231251	F1SQT3	311	K	49.724	0.000401708	Up	Phosphate carrier protein, mitochondrial OS=Sus scrofa OX=9823 GN=SLC25A3 PE=1 SV=2	SLC25A3	1	0.00354012	120.49	2	GVWK(1)GLFAR	0.72239	1.44358	1.29995	2.19031	0.0366626		0.0294866
Biological Process	GO:1902600	9	proton transmembrane transport	1.79	0.00231251	Q95339	48	K	3.421	0.0443506	Up	ATP synthase subunit f, mitochondrial OS=Sus scrofa OX=9823 GN=ATP5MF PE=1 SV=4	ATP5MF	1	0.00198235	126.28	2	YYNK(1)YVNVK	0.069426		1.14579	2.33014	0.707356	0.375224	0.441488
Biological Process	GO:1902600	9	proton transmembrane transport	1.79	0.00231251	F1SLA0	186	K	10.948	0.00494248	Up	ATP synthase subunit beta OS=Sus scrofa OX=9823 GN=ATP5F1B PE=1 SV=3	ATP5F1B	1	3.48884e-73	349.36	2	DATSK(1)VALVYGQMNEPPGAR	0.1646	1.56605	1.59411	2.33768	0.31474	0.0705891	0.116829
Biological Process	GO:1902600	9	proton transmembrane transport	1.79	0.00231251	F1SLA0	181	K	5.224	0.00736412	Up	ATP synthase subunit beta OS=Sus scrofa OX=9823 GN=ATP5F1B PE=1 SV=3	ATP5F1B	1	5.53867e-18	183.05	3	EGNDLYHEMIESGVINLK(1)DATSK	-1.6087	1.57695	2.30766		0.502214	0.309979	0.303192
Biological Process	GO:1902600	9	proton transmembrane transport	1.79	0.00231251	F1SLA0	402	K	2.794	0.0106685	Up	ATP synthase subunit beta OS=Sus scrofa OX=9823 GN=ATP5F1B PE=1 SV=3	ATP5F1B	1	0.00100762	75.773	3	FLSQPFQVAEVFTGHLGK(1)LVPLK	0.25155	1.15023	1.6496	1.23687		0.41109	0.552206
Biological Process	GO:1902600	9	proton transmembrane transport	1.79	0.00231251	F1SLA0	123	K	7.405	0.00970909	Up	ATP synthase subunit beta OS=Sus scrofa OX=9823 GN=ATP5F1B PE=1 SV=3	ATP5F1B	1	0.000997598	119.53	2	GGK(1)IGLFGGAGVGK	-0.12943	1.31266	1.13613	2.83733	0.404547	0.133587	0.175749
Biological Process	GO:1902600	9	proton transmembrane transport	1.79	0.00231251	F1SLA0	120	K	12.981	5.09182e-05	Up	ATP synthase subunit beta OS=Sus scrofa OX=9823 GN=ATP5F1B PE=1 SV=3	ATP5F1B	1	0.00154021	121.83	3	VVDLLAPYAK(1)GGK	-0.78541	1.88431	1.51837	2.16815	0.170641	0.129466	0.12906
Biological Process	GO:1902600	9	proton transmembrane transport	1.79	0.00231251	I3L8L8	656	K	3.37	0.00411691	Up	Sodium/potassium-transporting ATPase subunit alpha OS=Sus scrofa OX=9823 GN=LOC100157711 PE=1 SV=3	LOC100157711	1	0.00957737	91.265	2	LK(1)IPVDQVNAR	0.22803	1.74197	1.34312	1.54188	0.61044	0.308646	0.453941
Biological Process	GO:1902600	9	proton transmembrane transport	1.79	0.00231251	I3L8L8	847	K	10.904	0.000409895	Up	Sodium/potassium-transporting ATPase subunit alpha OS=Sus scrofa OX=9823 GN=LOC100157711 PE=1 SV=3	LOC100157711	1	5.63851e-20	273.79	2	NPK(1)TDNLVNHR	-1.1891	2.11753	1.29801	2.08042	0.172693	0.12391	0.207434
Biological Process	GO:1902600	9	proton transmembrane transport	1.79	0.00231251	I3LER5	29	K	48.469	0.00119823	Up	Cytochrome c oxidase subunit 4 OS=Sus scrofa OX=9823 GN=COX4I1 PE=1 SV=2	COX4I1	1	1.39427e-138	419	2	AHGSVVK(1)SEDYALPVYVDR	0.40325	1.70165	2.14573	2.03134	0.0833415	0.0211033	0.0168426
Biological Process	GO:1902600	9	proton transmembrane transport	1.79	0.00231251	I3LER5	53	K	51.392	5.31739e-05	Up	Cytochrome c oxidase subunit 4 OS=Sus scrofa OX=9823 GN=COX4I1 PE=1 SV=2	COX4I1	1	4.69014e-138	413.77	3	RDYPLPDVAHVK(1)NLSASQK	0.43057	2.37695	1.74451	1.76401	0.0435327	0.0251389	0.0458507
Biological Process	GO:1902600	9	proton transmembrane transport	1.79	0.00231251	I3LER5	67	K	15.169	0.000260437	Up	Cytochrome c oxidase subunit 4 OS=Sus scrofa OX=9823 GN=COX4I1 PE=1 SV=2	COX4I1	1	4.32855e-05	169.82	2	EK(1)ASWSSLSMDEK	-0.28379	2.05472	2.07852	1.49568	0.176294	0.0953942	0.099385
Biological Process	GO:1902600	9	proton transmembrane transport	1.79	0.00231251	K7GS22	106	K	4.456	0.00603714	Up	ATP synthase subunit epsilon, mitochondrial (Fragment)(predicted) OS=Sus scrofa OX=9823 GN=ATP5F1E PE=1 SV=1	ATP5F1E	1	0.000311566	167.23	2	YSQICAK(1)AVR	0.38176	1.66861	1.89084	1.34084	0.585443	0.272829	0.24144
Biological Process	GO:1902600	9	proton transmembrane transport	1.79	0.00231251	Q35914	46	K	52.17	0.000217935	Up	ATP synthase protein 8 OS=Sus scrofa OX=9823 GN=MT-ATP8 PE=1 SV=2	MT-ATP8	1	9.94447e-05	134.49	3	TQK(1)HSTPWEMK	-0.67298	1.64019	2.11007	2.1369	0.0625158	0.0237919	0.0265368
Biological Process	GO:1902600	9	proton transmembrane transport	1.79	0.00231251	Q5S3G4	74	K	7.268	0.0014986	Up	Cytochrome c oxidase subunit 5B, mitochondrial OS=Sus scrofa OX=9823 GN=COX5B PE=2 SV=1	COX5B	1	2.17713e-13	220.21	3	AASGTK(1)EDPNLVPSITNK	0.15485	1.3946	1.75735	2.12236	0.333291	0.241888	0.150505
Biological Process	GO:1902600	9	proton transmembrane transport	1.79	0.00231251	Q5S3G4	86	K	5.444	0.00289555	Up	Cytochrome c oxidase subunit 5B, mitochondrial OS=Sus scrofa OX=9823 GN=COX5B PE=2 SV=1	COX5B	1	4.07274e-05	154.15	2	EDPNLVPSITNK(1)R	0.15164	1.42037	1.77895	1.86961	0.463248	0.19139	0.276426
Biological Process	GO:1902600	9	proton transmembrane transport	1.79	0.00231251	Q5S3G4	121	K	2.951	0.00836663	Up	Cytochrome c oxidase subunit 5B, mitochondrial OS=Sus scrofa OX=9823 GN=COX5B PE=2 SV=1	COX5B	1	2.60102e-15	229.02	3	CPSCGTHYK(1)LVSHQLAH	-1.3063	1.27093	2.02523	1.18538	0.629776	0.506028	0.382653
Biological Process	GO:1902600	9	proton transmembrane transport	1.79	0.00231251	Q5S3G4	57	K	6.556	0.00645563	Up	Cytochrome c oxidase subunit 5B, mitochondrial OS=Sus scrofa OX=9823 GN=COX5B PE=2 SV=1	COX5B	1	0.000247349	182.54	2	K(1)GLDPYNILAPK	0.34386	1.46868	1.74772	1.32211	0.309129	0.152358
Biological Process	GO:0042407	9	cristae formation	2.09	0.00232596	A0A286ZX04	118	K	3.844	0.0120218	Up	ATP synthase subunit s, mitochondrial OS=Sus scrofa OX=9823 GN=DMAC2L PE=1 SV=1	DMAC2L	1	2.52744e-05	139.42	3	FCK(1)CHYIEDYCLER	-0.82746	1.11346	2.2252	1.4226	0.524335	0.468113	0.2463
Biological Process	GO:0042407	9	cristae formation	2.09	0.00232596	A0A5G2R4S0	101	K	8.453	0.000592505	Up	ATP synthase subunit b OS=Sus scrofa OX=9823 GN=ATP5PB PE=1 SV=1	ATP5PB	1	0.000182826	187	2	SQQALVQK(1)R	1.5433	1.3181	2.33146	1.71573	0.271491	0.170619	0.192593
Biological Process	GO:0042407	9	cristae formation	2.09	0.00232596	A0A287A2Y4	72	K	7.357	0.00117247	Up	ATP synthase subunit d, mitochondrial OS=Sus scrofa OX=9823 GN=ATP5PD PE=1 SV=1	ATP5PD	1	0.000261988	138.98	2	ATVAK(1)AGLVDDFEK(1)K	0.28055	1.91653	1.58483	1.78071	0.363496	0.166587	0.187844
Biological Process	GO:1902600	9	proton transmembrane transport	1.79	0.00231251	F1SQT3	216	K	53.028	0.000121842	Up	Phosphate carrier protein, mitochondrial OS=Sus scrofa OX=9823 GN=SLC25A3 PE=1 SV=2	SLC25A3	1	2.46406e-05	201.58	2	AFYK(1)GVAPLWMR	0.15915	1.4131	1.80164	2.6742	0.0349886	0.0503455	0.0257194
Biological Process	GO:0044703	4	multi-organism reproductive process	1.33	0.0022856	A0A5G2QPK6	151	K	12.703	0.000528701	Up	Dihydrolipoyl dehydrogenase OS=Sus scrofa OX=9823 GN=DLD PE=1 SV=1	DLD	1	5.05413e-10	201.61	3	ITGK(1)NQVTATK(1)ADGSTEVINTK	0.16389	1.75435	1.80692	2.00089	0.222108	0.0946223	0.121115
Biological Process	GO:0044703	4	multi-organism reproductive process	1.33	0.0022856	I3L8L8	656	K	3.37	0.00411691	Up	Sodium/potassium-transporting ATPase subunit alpha OS=Sus scrofa OX=9823 GN=LOC100157711 PE=1 SV=3	LOC100157711	1	0.00957737	91.265	2	LK(1)IPVDQVNAR	0.22803	1.74197	1.34312	1.54188	0.61044	0.308646	0.453941
Biological Process	GO:0044703	4	multi-organism reproductive process	1.33	0.0022856	F1SP87	57	K	5.396	0.00317599	Up	Acrosome formation-associated factor (Fragment)(predicted) OS=Sus scrofa OX=9823 PE=1 SV=4	--	1	1.25043e-11	188.96	2	ENIPANDK(1)TDDYYK	0.26356	1.0858	1.50891	2.4672	0.354295	0.328867	0.25492
Biological Process	GO:0044703	4	multi-organism reproductive process	1.33	0.0022856	F1RRW4	227	K	2.907	0.0324765	Up	Angiotensin-converting enzyme OS=Sus scrofa OX=9823 GN=ACE PE=1 SV=2	ACE	1	4.87309e-09	230.46	2	SYEELLWAWK(1)GWR	-0.073143	0.991207	2.04948	1.42351	0.746867	0.29592	0.493021
Biological Process	GO:0044703	4	multi-organism reproductive process	1.33	0.0022856	A0A5G2QVS4	401	K	8.341	0.00493415	Up	Hyaluronidase OS=Sus scrofa OX=9823 GN=SPAM1 PE=1 SV=1	SPAM1	1	1.07372e-25	269.44	2	EFSK(1)NFYCSCFANFHCK	0.17057	2.36921	0.809121	2.17931	0.252999	0.214442	0.174918
Biological Process	GO:0044703	4	multi-organism reproductive process	1.33	0.0022856	A0A5G2QVS4	414	K	2.775	0.0297565	Up	Hyaluronidase OS=Sus scrofa OX=9823 GN=SPAM1 PE=1 SV=1	SPAM1	1	3.19047e-07	155.28	3	NFYCSCFANFHCK(1)ER	-0.15606	0.985313	1.3414	2.08393	0.624298	0.636608	0.328456
Biological Process	GO:0044703	4	multi-organism reproductive process	1.33	0.0022856	A0A5G2QVS4	270	K	2.814	0.0153794	Up	Hyaluronidase OS=Sus scrofa OX=9823 GN=SPAM1 PE=1 SV=1	SPAM1	1	0.000462687	134.66	2	LK(1)PSQVALFVR	-0.099909	1.02128	1.43728	1.96829	0.702955	0.471789	0.398419
Biological Process	GO:0044703	4	multi-organism reproductive process	1.33	0.0022856	F1SMN3	487	K	57.038	0.00154692	Up	Coiled-coil domain containing 136 OS=Sus scrofa OX=9823 GN=CCDC136 PE=1 SV=4	CCDC136	1	0.00142945	154.01	2	AQLQEVK(1)R	-0.48159	1.50572	1.72785	2.66305	0.0537132	0.0398576	0.00980928
Biological Process	GO:0044703	4	multi-organism reproductive process	1.33	0.0022856	F1SMN3	408	K	16.519	0.00224379	Up	Coiled-coil domain containing 136 OS=Sus scrofa OX=9823 GN=CCDC136 PE=1 SV=4	CCDC136	1	1.36178e-49	317.31	2	ITK(1)SQVVESQSEK	0.29153	1.39493	1.10455	2.30656	0.0981356		0.0958267
Biological Process	GO:0044703	4	multi-organism reproductive process	1.33	0.0022856	A0A5G2RK05	1602	K	8.222	0.00197704	Up	Zonadhesin OS=Sus scrofa OX=9823 GN=ZAN PE=4 SV=1	ZAN	1	0.00054167	182.92	2	CLGK(1)EVADAWR	-0.0061609	1.66011	1.41517	2.27411	0.310068	0.215902	0.124632
Biological Process	GO:0044703	4	multi-organism reproductive process	1.33	0.0022856	A0A5G2RK05	1928	K	5.837	0.00201501	Up	Zonadhesin OS=Sus scrofa OX=9823 GN=ZAN PE=4 SV=1	ZAN	1	2.04571e-09	228.64	2	GFLEVEIPK(1)AYYGR	0.025039	1.65791	1.29457	2.16999	0.417795	0.234901	0.224833
Biological Process	GO:0044703	4	multi-organism reproductive process	1.33	0.0022856	A0A5G2RK05	143	K	8.734	0.00598312	Up	Zonadhesin OS=Sus scrofa OX=9823 GN=ZAN PE=4 SV=1	ZAN	1	0.000682494	141.52	3	GK(1)HPNVLWK	0.040295	1.53816	1.20746	2.63796	0.363329	0.132229	0.120866
Biological Process	GO:0044703	4	multi-organism reproductive process	1.33	0.0022856	F1RRW4	522	K	3.276	0.00904924	Up	Angiotensin-converting enzyme OS=Sus scrofa OX=9823 GN=ACE PE=1 SV=2	ACE	1	1.45134e-80	370.78	3	SITK(1)ENYNQEWWSLR	-0.21524	1.38152	1.39033	1.82493	0.680536	0.430689	0.291989
Biological Process	GO:0044703	4	multi-organism reproductive process	1.33	0.0022856	A0A5G2RK05	150	K	18.106	0.0126667	Up	Zonadhesin OS=Sus scrofa OX=9823 GN=ZAN PE=4 SV=1	ZAN	1	3.09785e-21	175.15	4	HPNVLWK(1)HSNAQSPSWMPTAVTVPTGLILPGR	-0.13247	0.674011	1.57461	3.43734	0.119798	0.160265	0.0339792
Biological Process	GO:0044703	4	multi-organism reproductive process	1.33	0.0022856	A0A5G2RK05	1485	K	3.57	0.000995818	Up	Zonadhesin OS=Sus scrofa OX=9823 GN=ZAN PE=4 SV=1	ZAN	1	0.0141514	124.89	2	ISLIK(1)GR	0.2182	1.7337	1.23504	1.71835	0.52044	0.416919	0.375551
Biological Process	GO:0044703	4	multi-organism reproductive process	1.33	0.0022856	A0A5G2RK05	141	K	2.862	0.00546416	Up	Zonadhesin OS=Sus scrofa OX=9823 GN=ZAN PE=4 SV=1	ZAN	1	0.0047354	108.98	2	LLLTSGSK(1)GK	0.31394	1.1523	1.44367	1.85041	0.658997	0.417449	0.477178
Biological Process	GO:0044703	4	multi-organism reproductive process	1.33	0.0022856	D3K5M3	51	K	7.745	0.00480716	Up	A-kinase (PRKA) anchor protein 3 OS=Sus scrofa OX=9823 GN=AKAP3 PE=2 SV=1	AKAP3	1	8.91174e-09	222.74	3	RDLEK(1)STAGFQDVR	-1.2138	1.45635	1.17676	1.97064	0.248053		0.148202
Biological Process	GO:0044703	4	multi-organism reproductive process	1.33	0.0022856	D3K5M3	320	K	4.111	0.000212752	Up	A-kinase (PRKA) anchor protein 3 OS=Sus scrofa OX=9823 GN=AKAP3 PE=2 SV=1	AKAP3	1	0.000137186	163.32	2	DTTIATILLK(1)K	-0.67876	1.50788	1.50893	1.80926	0.329081	0.453112	0.391739
Biological Process	GO:0044703	4	multi-organism reproductive process	1.33	0.0022856	D3K5M3	467	K	21.77	0.000493969	Up	A-kinase (PRKA) anchor protein 3 OS=Sus scrofa OX=9823 GN=AKAP3 PE=2 SV=1	AKAP3	1	3.84913e-38	311.77	2	EGLTLWHK(1)SQQK	0.24478	1.63241	1.20385	2.90024	0.0652487	0.100583	0.0976707
Biological Process	GO:0044703	4	multi-organism reproductive process	1.33	0.0022856	D3K5M3	417	K	44.764	0.000546356	Up	A-kinase (PRKA) anchor protein 3 OS=Sus scrofa OX=9823 GN=AKAP3 PE=2 SV=1	AKAP3	1	0.0187196	100.39	2	EMGDPK(1)NR	0.045724	1.14209	1.5522	3.1746	0.0273917	0.0478421	0.0558743
Biological Process	GO:0044703	4	multi-organism reproductive process	1.33	0.0022856	D3K5M3	62	K	8.476	0.00597179	Up	A-kinase (PRKA) anchor protein 3 OS=Sus scrofa OX=9823 GN=AKAP3 PE=2 SV=1	AKAP3	1	3.33684e-05	111.38	3	FK(1)PGESSFGGEMVNWTDPHK	0.59564	1.18083	1.31428	2.8717	0.339782	0.131463	0.161948
Biological Process	GO:0044703	4	multi-organism reproductive process	1.33	0.0022856	D3K5M3	80	K	38.064	0.000714188	Up	A-kinase (PRKA) anchor protein 3 OS=Sus scrofa OX=9823 GN=AKAP3 PE=2 SV=1	AKAP3	1	1.08613e-06	103.01	4	FKPGESSFGGEMVNWTDPHK(1)GFCVDYYNTTAK	-0.55955	1.3499	1.56488	1.99916	0.0545952	0.0314685
Biological Process	GO:0044703	4	multi-organism reproductive process	1.33	0.0022856	D3K5M3	92	K	29.971	0.00133522	Up	A-kinase (PRKA) anchor protein 3 OS=Sus scrofa OX=9823 GN=AKAP3 PE=2 SV=1	AKAP3	1	3.18109e-55	330.14	3	GFCVDYYNTTAK(1)GNPGR	0.10303	1.22684	1.33159	3.24784	0.102385	0.0387651	0.052579
Biological Process	GO:0044703	4	multi-organism reproductive process	1.33	0.0022856	A0A5G2RK05	1595	K	14.477	0.00441199	Up	Zonadhesin OS=Sus scrofa OX=9823 GN=ZAN PE=4 SV=1	ZAN	1	6.40624e-26	269.78	2	INELSEPGCFAEGGK(1)PPR	-0.29053	1.15742	1.15244	3.30248	0.210392	0.0910248	0.0862435
Biological Process	GO:0044703	4	multi-organism reproductive process	1.33	0.0022856	F1RRW4	498	K	2.189	0.0430166	Up	Angiotensin-converting enzyme OS=Sus scrofa OX=9823 GN=ACE PE=1 SV=2	ACE	1	5.72615e-07	144.12	3	MALDK(1)VAFVPFSYLVDQWR	0.34138	1.15378	1.12656	1.83843	0.393559	0.638712	0.848956
Biological Process	GO:0044703	4	multi-organism reproductive process	1.33	0.0022856	F1RRW4	469	K	2.073	0.0284457	Up	Angiotensin-converting enzyme OS=Sus scrofa OX=9823 GN=ACE PE=1 SV=2	ACE	1	2.22881e-19	196.41	3	EGANPGFHEAIGDVLALSVSTPK(1)HLR	-0.044121	1.04491	1.36048	1.64235	0.901016	0.526329	0.524913
Biological Process	GO:0044703	4	multi-organism reproductive process	1.33	0.0022856	A0A5G2QQD3	106	K	44.385	0.00481902	Up	Outer dense fiber of sperm tails 2 OS=Sus scrofa OX=9823 GN=ODF2 PE=3 SV=1	ODF2	0.999953	0.000214564	143.79	2	VK(1)TKVPWMPPGK	0.0090632	1.89254	2.01932		0.0326699		0.0554654
Biological Process	GO:0044703	4	multi-organism reproductive process	1.33	0.0022856	A0A5G2QPK6	119	K	12.123	0.00472041	Up	Dihydrolipoyl dehydrogenase OS=Sus scrofa OX=9823 GN=DLD PE=1 SV=1	DLD	1	9.06167e-05	179.1	2	MMEQK(1)SNAVK	-0.32445	1.39617	0.839096	3.30751	0.181401	0.130613	0.145213
Biological Process	GO:0044703	4	multi-organism reproductive process	1.33	0.0022856	A0A5G2QPK6	124	K	11.949	0.0040856	Up	Dihydrolipoyl dehydrogenase OS=Sus scrofa OX=9823 GN=DLD PE=1 SV=1	DLD	1	1.49524e-09	167.14	3	SNAVK(1)ALTGGIAHLFK(1)QNK	-0.511	2.07125	0.955968	1.70857	0.123067	0.141145
Biological Process	GO:0044703	4	multi-organism reproductive process	1.33	0.0022856	A0A5G2QPK6	402	K	2.117	0.0256796	Up	Dihydrolipoyl dehydrogenase OS=Sus scrofa OX=9823 GN=DLD PE=1 SV=1	DLD	1	6.03025e-06	209.19	2	SEEQLK(1)EEGIEYK	0.28517	1.32037	1.83202	0.922558	0.625911	0.712405	0.586733
Biological Process	GO:0044703	4	multi-organism reproductive process	1.33	0.0022856	A0A5G2QQD3	459	K	4.8	0.00466506	Up	Outer dense fiber of sperm tails 2 OS=Sus scrofa OX=9823 GN=ODF2 PE=3 SV=1	ODF2	1	2.87206e-11	182.7	3	AEK(1)SEEYAEQLHVQLADK	0.1325	1.23089	1.80738	1.92731	0.444759	0.3879	0.201759
Biological Process	GO:0044703	4	multi-organism reproductive process	1.33	0.0022856	A0A5G2QQD3	377	K	22.934	0.00235578	Up	Outer dense fiber of sperm tails 2 OS=Sus scrofa OX=9823 GN=ODF2 PE=3 SV=1	ODF2	1	0.000225348	148.32	2	AQAK(1)TASELSK	-0.020086		2.29616	2.3969	0.159082	0.0712524	0.076609
Biological Process	GO:0044703	4	multi-organism reproductive process	1.33	0.0022856	A0A5G2QQD3	384	K	47.561	0.000112013	Up	Outer dense fiber of sperm tails 2 OS=Sus scrofa OX=9823 GN=ODF2 PE=3 SV=1	ODF2	1	4.46546e-14	254.53	2	TASELSK(1)SMESMR	0.80782	1.39487	2.06886	2.41271	0.0585644	0.0310926	0.0338989
Biological Process	GO:0044703	4	multi-organism reproductive process	1.33	0.0022856	A0A5G2QQD3	581	K	23.541	0.00442824	Up	Outer dense fiber of sperm tails 2 OS=Sus scrofa OX=9823 GN=ODF2 PE=3 SV=1	ODF2	1	1.77101e-14	253.97	2	ASVK(1)NYEGMIDNYK	0.23787	1.08105	1.30815	3.36632	0.156912	0.0386281	0.0489472
Biological Process	GO:0044703	4	multi-organism reproductive process	1.33	0.0022856	A0A5G2QQD3	591	K	22.227	0.000913048	Up	Outer dense fiber of sperm tails 2 OS=Sus scrofa OX=9823 GN=ODF2 PE=3 SV=1	ODF2	1	3.94375e-22	267.91	2	NYEGMIDNYK(1)SQVMK	-0.2147	1.37621	1.23724	3.12824	0.114997	0.0611951	0.0821271
Biological Process	GO:0044703	4	multi-organism reproductive process	1.33	0.0022856	A0A5G2QQD3	241	K	28.673	7.79228e-05	Up	Outer dense fiber of sperm tails 2 OS=Sus scrofa OX=9823 GN=ODF2 PE=3 SV=1	ODF2	1	2.63086e-13	249.69	2	IKEEKDFTVLQK(1)K	-0.25951	1.7698	1.94951	2.07849	0.0892899	0.0679612	0.0449544
Biological Process	GO:0044703	4	multi-organism reproductive process	1.33	0.0022856	A0A5G2QQD3	242	K	93.632	0.000827518	Up	Outer dense fiber of sperm tails 2 OS=Sus scrofa OX=9823 GN=ODF2 PE=3 SV=1	ODF2	1	2.70656e-19	262.24	2	K(1)HLQQEK	-0.89588	0.976955	2.0046	1.9831	0.0150557		0.0202929
Biological Process	GO:0044703	4	multi-organism reproductive process	1.33	0.0022856	A0A5G2QQD3	687	K	5.766	0.00573386	Up	Outer dense fiber of sperm tails 2 OS=Sus scrofa OX=9823 GN=ODF2 PE=3 SV=1	ODF2	1	0.000199061	178.46	3	DWQK(1)GSHELAR	-4.3314	1.75731	2.21047		0.476861	0.290002	0.26535
Biological Process	GO:0044703	4	multi-organism reproductive process	1.33	0.0022856	A0A5G2QQD3	254	K	3.596	0.0457166	Up	Outer dense fiber of sperm tails 2 OS=Sus scrofa OX=9823 GN=ODF2 PE=3 SV=1	ODF2	1	6.17738e-26	259.1	3	HLQQEK(1)ECLMSK(1)LVEAEMDGAAAAK	-0.0522	1.6448	2.01579	1.03384	0.880279	0.186791	0.238499
Biological Process	GO:0044703	4	multi-organism reproductive process	1.33	0.0022856	A0A5G2QQD3	182	K	73.773	0.000748508	Up	Outer dense fiber of sperm tails 2 OS=Sus scrofa OX=9823 GN=ODF2 PE=3 SV=1	ODF2	1	2.0385e-159	437.41	2	KIDSLMNAVGCLK(1)SEVK	-0.22037	1.57079	1.64752	2.70145	0.0472426	0.0229699	0.0100304
Biological Process	GO:0044703	4	multi-organism reproductive process	1.33	0.0022856	A0A5G2QQD3	619	K	7.006	4.60828e-05	Up	Outer dense fiber of sperm tails 2 OS=Sus scrofa OX=9823 GN=ODF2 PE=3 SV=1	ODF2	1	0.000898223	180.18	2	ILK(1)DEMNK	-0.010783	1.62345	1.93116	1.69598	0.290446	0.245573	0.213388
Biological Process	GO:0044703	4	multi-organism reproductive process	1.33	0.0022856	A0A5G2QQD3	556	K	2.888	0.00661531	Up	Outer dense fiber of sperm tails 2 OS=Sus scrofa OX=9823 GN=ODF2 PE=3 SV=1	ODF2	1	0.00208521	117.67	2	LK(1)ASFAPMEDK	0.75585	1.19342	1.23329	2.03011	0.558436	0.571056	0.413685
Biological Process	GO:0044703	4	multi-organism reproductive process	1.33	0.0022856	A0A5G2QQD3	358	K	42.867	0.017392	Up	Outer dense fiber of sperm tails 2 OS=Sus scrofa OX=9823 GN=ODF2 PE=3 SV=1	ODF2	1	7.90589e-23	231.89	2	LLLLLQDK(1)DK	0.60428	1.27351	2.63531			0.0607322	0.0304517
Biological Process	GO:0044703	4	multi-organism reproductive process	1.33	0.0022856	A0A5G2QQD3	339	K	23.116	0.00200366	Up	Outer dense fiber of sperm tails 2 OS=Sus scrofa OX=9823 GN=ODF2 PE=3 SV=1	ODF2	1	1.81189e-05	168.8	2	LMEQQGALLK(1)R	0.18355	1.1951	1.79217	2.76394	0.146758	0.0403156	0.0617193
Biological Process	GO:0044703	4	multi-organism reproductive process	1.33	0.0022856	A0A5G2QQD3	297	K	12.021	0.0006451	Up	Outer dense fiber of sperm tails 2 OS=Sus scrofa OX=9823 GN=ODF2 PE=3 SV=1	ODF2	1	6.20789e-06	217.02	2	QK(1)ELLLQK	-0.25407	1.80953	1.53058	2.1991	0.22736	0.099837	0.133592
Biological Process	GO:0044703	4	multi-organism reproductive process	1.33	0.0022856	A0A5G2QQD3	108	K	69.54	5.6459e-05	Up	Outer dense fiber of sperm tails 2 OS=Sus scrofa OX=9823 GN=ODF2 PE=3 SV=1	ODF2	1	0.00585361	110.88	2	TK(1)VPWMPPGK	0.7451	1.77472	1.83773	2.30249	0.0408053	0.0189012	0.0253516
Biological Process	GO:0044703	4	multi-organism reproductive process	1.33	0.0022856	A0A5G2QQD3	116	K	44.59	6.4448e-05	Up	Outer dense fiber of sperm tails 2 OS=Sus scrofa OX=9823 GN=ODF2 PE=3 SV=1	ODF2	1	4.22569e-05	150.61	2	VPWMPPGK(1)SSAR	0.08693	1.50645	1.97375	2.3882	0.0595762	0.0333653	0.0386662
Biological Process	GO:0044703	4	multi-organism reproductive process	1.33	0.0022856	A0A5G2QQD3	86	K	57.689	0.000220107	Up	Outer dense fiber of sperm tails 2 OS=Sus scrofa OX=9823 GN=ODF2 PE=3 SV=1	ODF2	1	1.27219e-21	262.43	3	TPCGAPSVTVTK(1)SHK(1)R	-0.032243	1.35893	1.69412	2.84471	0.0418123	0.0204295	0.0399924
Biological Process	GO:0044703	4	multi-organism reproductive process	1.33	0.0022856	D3K5M3	328	K	5.794	0.00175483	Up	A-kinase (PRKA) anchor protein 3 OS=Sus scrofa OX=9823 GN=AKAP3 PE=2 SV=1	AKAP3	1	1.13655e-51	323.24	2	HAK(1)EVVSDLIDSFMK	-0.21864	1.11748	1.63263	2.36677	0.308952	0.249554	0.32461
Biological Process	GO:0044703	4	multi-organism reproductive process	1.33	0.0022856	F1SSA4	176	K	5.318	0.0313583	Up	Coiled-coil domain containing 42 OS=Sus scrofa OX=9823 GN=CCDC42 PE=4 SV=1	CCDC42	1	6.65476e-21	223.97	4	YK(1)TLVSMHHDLMQAAQEGQEK	0.051515	1.04144	1.1579	2.24367	0.390243		0.166743
Biological Process	GO:0044703	4	multi-organism reproductive process	1.33	0.0022856	D3K5M3	153	K	33.118	0.000325844	Up	A-kinase (PRKA) anchor protein 3 OS=Sus scrofa OX=9823 GN=AKAP3 PE=2 SV=1	AKAP3	1	0.0287403	95.352	2	IDGFEK(1)K	-0.095223	1.69104	2.0921	2.041	0.0902921	0.0541011	0.031467
Biological Process	GO:0044703	4	multi-organism reproductive process	1.33	0.0022856	D3K5M3	360	K	10.156	0.00130801	Up	A-kinase (PRKA) anchor protein 3 OS=Sus scrofa OX=9823 GN=AKAP3 PE=2 SV=1	AKAP3	1	1.58937e-123	409.89	3	NLHNVTGTLMTDTDFVSAVK(1)R	-0.37398	1.52917	1.15073	2.78226	0.217208	0.150567	0.170058
Biological Process	GO:0044703	4	multi-organism reproductive process	1.33	0.0022856	F1RM74	130	K	12.66	0.00241588	Up	Glyceraldehyde-3-phosphate dehydrogenase OS=Sus scrofa OX=9823 GN=GAPDHS PE=1 SV=3	GAPDHS	1	0.000297908	170.95	2	GTVEYK(1)NDK	-0.81293	1.34678	1.169	3.04498	0.210911	0.122998	0.105329
Biological Process	GO:0044703	4	multi-organism reproductive process	1.33	0.0022856	F1RM74	115	K	3.82	0.0475356	Up	Glyceraldehyde-3-phosphate dehydrogenase OS=Sus scrofa OX=9823 GN=GAPDHS PE=1 SV=3	GAPDHS	1	1.06131e-06	111.44	3	VVAVNDPFIDPEYMVYMFK(1)YDSTHGR	-0.17391	1.49391	0.848235	1.91499		0.23936	0.503503
Biological Process	GO:0044703	4	multi-organism reproductive process	1.33	0.0022856	F1RR24	332	K	8.422	0.00229486	Up	Spermatogenesis associated 32 OS=Sus scrofa OX=9823 GN=SPATA32 PE=4 SV=3	SPATA32	1	0.00214984	117.28	3	GSPLLLK(1)IHFK	-0.84279	1.62671	1.1269	2.60955	0.284131	0.150637	0.202065
Biological Process	GO:0044703	4	multi-organism reproductive process	1.33	0.0022856	F1RR24	288	K	2.953	0.0140776	Up	Spermatogenesis associated 32 OS=Sus scrofa OX=9823 GN=SPATA32 PE=4 SV=3	SPATA32	1	0.00247806	88.108	3	RLPHPYLDFSK(1)PGFK	-0.2291	2.02652	1.28925		0.463978	0.595758	0.624499
Biological Process	GO:0044703	4	multi-organism reproductive process	1.33	0.0022856	F1RR24	226	K	14.736	0.00192589	Up	Spermatogenesis associated 32 OS=Sus scrofa OX=9823 GN=SPATA32 PE=4 SV=3	SPATA32	1	0.000379847	153.12	2	TDLPSLK(1)HLIK	0.062062	1.96769	1.04498	1.77092	0.101675		0.114743
Biological Process	GO:0044703	4	multi-organism reproductive process	1.33	0.0022856	F1RRQ9	124	K	2.251	0.0489057	Up	Lysozyme like 6 OS=Sus scrofa OX=9823 GN=LYZL6 PE=3 SV=1	LYZL6	1	3.12071e-05	194.06	2	IVSGAGGMK(1)NWVK	0.72487	1.1874	1.21845	1.74884	0.967693	0.360027	0.517596
Biological Process	GO:0044703	4	multi-organism reproductive process	1.33	0.0022856	F1S1R1	538	K	5.866	0.008677	Up	Cylicin 1 OS=Sus scrofa OX=9823 GN=CYLC1 PE=4 SV=3	CYLC1	1	3.24445e-11	174.19	3	NPPMFK(1)SSDAESEESLHK	1.2097	1.35313	1.29955	2.47347	0.495096	0.184236	0.194522
Biological Process	GO:0044703	4	multi-organism reproductive process	1.33	0.0022856	F1S1R1	481	K	5.54	0.0427469	Up	Cylicin 1 OS=Sus scrofa OX=9823 GN=CYLC1 PE=4 SV=3	CYLC1	1	6.22568e-55	318.4	3	SAVK(1)SEESTETESDWESK	-1.5396	1.77978	0.953955	1.72923	0.422394	0.114638
Biological Process	GO:0044703	4	multi-organism reproductive process	1.33	0.0022856	F1S1R1	495	K	3.058	0.00201495	Up	Cylicin 1 OS=Sus scrofa OX=9823 GN=CYLC1 PE=4 SV=3	CYLC1	1	3.68004e-22	265.72	2	SEESTETESDWESK(1)K	-0.004367	1.33985	1.82733	1.35439	0.616396	0.430075	0.431961
Biological Process	GO:0044703	4	multi-organism reproductive process	1.33	0.0022856	F1RM74	294	K	3.469	0.00569161	Up	Glyceraldehyde-3-phosphate dehydrogenase OS=Sus scrofa OX=9823 GN=GAPDHS PE=1 SV=3	GAPDHS	1	0.000294522	168.23	2	GK(1)LTGMAFR	0.045488	1.27916	1.28329	2.09482	0.581429	0.332827	0.428462
Biological Process	GO:0044703	4	multi-organism reproductive process	1.33	0.0022856	F1S2F6	74	K	283.335	1.82758e-06	Up	Voltage-dependent anion-selective channel protein 2 OS=Sus scrofa OX=9823 GN=VDAC2 PE=3 SV=3	VDAC2	1	1.67683e-09	236.57	3	YK(1)WCEYGLTFTEK	0.75324	1.68526	2.23826	2.05538	0.0061038	0.00647463	0.00852342
Biological Process	GO:0044703	4	multi-organism reproductive process	1.33	0.0022856	F1SA26	66	K	8.108	0.000895461	Up	Arginase OS=Sus scrofa OX=9823 GN=ARG2 PE=3 SV=1	ARG2	1	2.47601e-08	157.73	3	LSDLGCHLK(1)DFGDLSFTPVPK	0.13971	1.46262	1.89479	1.26271		0.195978	0.183907
Biological Process	GO:0044703	4	multi-organism reproductive process	1.33	0.0022856	F1SAE4	266	K	9.925	0.00365451	Up	NME/NM23 family member 8 OS=Sus scrofa OX=9823 GN=NME8 PE=4 SV=4	NME8	1	1.49684e-27	280.55	2	HK(1)QDSLQEYMR	-1.6474	1.23207	1.65381	1.79942	0.206044		0.108654
Biological Process	GO:0044703	4	multi-organism reproductive process	1.33	0.0022856	F1SAE4	99	K	4.822	0.0290064	Up	NME/NM23 family member 8 OS=Sus scrofa OX=9823 GN=NME8 PE=4 SV=4	NME8	1	0.000393236	138.26	2	IK(1)GANAPLVNQK	-0.54016	1.33893	1.08117	1.97261	0.43674		0.170543
Biological Process	GO:0044703	4	multi-organism reproductive process	1.33	0.0022856	F1SAQ8	182	K	9.291	0.00236575	Up	Nucleoside-diphosphate kinase OS=Sus scrofa OX=9823 GN=AK7 PE=4 SV=3	AK7	1	4.96123e-06	180.27	3	K(1)HHPNFLDHINAEK	0.26996	1.99572	1.61558		0.199017		0.18968
Biological Process	GO:0044703	4	multi-organism reproductive process	1.33	0.0022856	F1SDE8	261	K	2.24	0.0045704	Up	Tektin OS=Sus scrofa OX=9823 GN=TEKT3 PE=3 SV=2	TEKT3	1	0.00468186	109.21	2	DLSDK(1)QAAYR	-0.61587	1.41304	1.67492	1.05998	0.655688	0.583917	0.612457
Biological Process	GO:0044703	4	multi-organism reproductive process	1.33	0.0022856	F1SDE8	57	K	14.24	0.000171441	Up	Tektin OS=Sus scrofa OX=9823 GN=TEKT3 PE=3 SV=2	TEKT3	1	2.45032e-21	145.43	3	PSTYYK(1)AASNWPALDPYCTR	0.25709	1.63762	1.70604	2.26264	0.17732	0.10149	0.114881
Biological Process	GO:0044703	4	multi-organism reproductive process	1.33	0.0022856	F1SDE8	360	K	8.504	0.021205	Up	Tektin OS=Sus scrofa OX=9823 GN=TEKT3 PE=3 SV=2	TEKT3	1	0.00170209	129.56	2	NK(1)MQIHLAK	0.41011	0.946739	1.02788	2.66191	0.222667	0.140806
Biological Process	GO:0044703	4	multi-organism reproductive process	1.33	0.0022856	Q29016	354	K	9.985	0.00571334	Up	Acrosin-binding protein OS=Sus scrofa OX=9823 GN=ACRBP PE=1 SV=2	ACRBP	1	7.03719e-105	384.27	3	AWQYLEDETLGFGK(1)SVCDSLGRR	0.66238	1.54677	1.14722	2.7598	0.313466	0.138401	0.0943442
Biological Process	GO:0044703	4	multi-organism reproductive process	1.33	0.0022856	Q29016	487	K	9.826	0.00708162	Up	Acrosin-binding protein OS=Sus scrofa OX=9823 GN=ACRBP PE=1 SV=2	ACRBP	1	5.142e-24	239	3	ICDTEYVQYPNYCAFK(1)SQQCMMR	-0.41274	1.00941	1.51261	2.92377	0.317915	0.123836	0.11245
Biological Process	GO:0044703	4	multi-organism reproductive process	1.33	0.0022856	F1S6Q0	25	K	6.091	0.00593491	Up	Testis-specific serine kinase 6 OS=Sus scrofa OX=9823 GN=TSSK6 PE=2 SV=2	TSSK6	1	0.0100207	90.108	2	TIGEGSYSK(1)VK	2.0278	1.13135	1.64238	1.73302		0.309255	0.183997
Biological Process	GO:0044703	4	multi-organism reproductive process	1.33	0.0022856	F1RM74	147	K	1.994	0.0125941	Up	Glyceraldehyde-3-phosphate dehydrogenase OS=Sus scrofa OX=9823 GN=GAPDHS PE=1 SV=3	GAPDHS	1	0.000153924	147.51	2	EINVFQCK(1)QPK	1.3588	1.2332		1.43087	0.652366	0.683567
Biological Process	GO:0044703	4	multi-organism reproductive process	1.33	0.0022856	F1RLA2	127	K	4.06	0.00923211	Up	Epididymal sperm-binding protein 1 OS=Sus scrofa OX=9823 GN=ELSPBP1 PE=4 SV=2	ELSPBP1	1	5.88549e-06	130.83	3	YCEINEYGGNSFSK(1)PCIFPSK	-1.3743	0.981692	1.59149	1.72161	0.365926	0.33928
Biological Process	GO:0044703	4	multi-organism reproductive process	1.33	0.0022856	F1RLA2	134	K	4.03	0.00607671	Up	Epididymal sperm-binding protein 1 OS=Sus scrofa OX=9823 GN=ELSPBP1 PE=4 SV=2	ELSPBP1	1	4.97896e-09	213.35	2	PCIFPSK(1)YR	0.28788	1.22034	1.24593	1.82397	0.304881	0.404868
Biological Process	GO:0044703	4	multi-organism reproductive process	1.33	0.0022856	D3K5M3	591	K	5.758	0.00516777	Up	A-kinase (PRKA) anchor protein 3 OS=Sus scrofa OX=9823 GN=AKAP3 PE=2 SV=1	AKAP3	1	1.57353e-32	250.82	4	SPAVSDESSLKPPHVGGDQEEAEK(1)K	0.37947	1.54561	1.14665	1.78892	0.317143	0.201671
Biological Process	GO:0044703	4	multi-organism reproductive process	1.33	0.0022856	D3K5M3	306	K	6.209	0.00260612	Up	A-kinase (PRKA) anchor protein 3 OS=Sus scrofa OX=9823 GN=AKAP3 PE=2 SV=1	AKAP3	1	0.0195947	116.54	2	TLK(1)IQVK	-0.79416	1.32927	1.3412	2.4972	0.37818	0.215806	0.23835
Biological Process	GO:0044703	4	multi-organism reproductive process	1.33	0.0022856	D3K5M3	814	K	6.125	0.00365781	Up	A-kinase (PRKA) anchor protein 3 OS=Sus scrofa OX=9823 GN=AKAP3 PE=2 SV=1	AKAP3	1	0.0031132	112.15	2	LLQLSAAAVDK(1)GR	0.68486	1.79756	0.950212	2.41008	0.323437	0.24347	0.275244
Biological Process	GO:0044703	4	multi-organism reproductive process	1.33	0.0022856	A0A5G2R0D3	41	K	3.677	0.0295098	Up	A-kinase anchor protein 14 isoform a(predicted) OS=Sus scrofa OX=9823 GN=AKAP14 PE=1 SV=1	AKAP14	1	2.31894e-08	153.36	3	DTSDINELALALAK(1)HAIDAAVK	0.31791	0.985622	1.30136	2.43002	0.641284	0.40774	0.233975
Biological Process	GO:0044703	4	multi-organism reproductive process	1.33	0.0022856	D9U8D1	49	K	3.591	0.00079185	Up	Dynein light chain OS=Sus scrofa OX=9823 GN=DYNLL1 PE=1 SV=1	DYNLL1	1	4.66519e-09	234.9	3	K(1)YNPTWHCIVGR	0.378	1.43404	1.64325	1.61594	0.333093	0.528783	0.44489
Biological Process	GO:0044703	4	multi-organism reproductive process	1.33	0.0022856	D9U8D1	9	K	24.408	0.00694407	Up	Dynein light chain OS=Sus scrofa OX=9823 GN=DYNLL1 PE=1 SV=1	DYNLL1	1	1.84054e-39	275.2	3	AVIK(1)NADMSEEMQQDSVECATQALEK	-0.66159	1.21488	0.916273	2.73591	0.084108	0.0488266
Biological Process	GO:0044703	4	multi-organism reproductive process	1.33	0.0022856	D9U8D1	43	K	5.345	0.00818309	Up	Dynein light chain OS=Sus scrofa OX=9823 GN=DYNLL1 PE=1 SV=1	DYNLL1	1	0.0101084	107.66	2	DIAAHIK(1)K	0.63195	1.61044	0.872354	2.57155	0.260128	0.34158	0.343941
Biological Process	GO:0044703	4	multi-organism reproductive process	1.33	0.0022856	D0G0C9	368	K	3.48	0.00515325	Up	T-complex protein 1 subunit eta OS=Sus scrofa OX=9823 GN=CCT7 PE=1 SV=1	CCT7	1	0.000769215	140.5	2	AK(1)TCTIILR	0.67786	1.30075	1.36238	1.99767	0.611012	0.330103	0.398082
Biological Process	GO:0044703	4	multi-organism reproductive process	1.33	0.0022856	D0G0C9	320	K	2.195	0.0426921	Up	T-complex protein 1 subunit eta OS=Sus scrofa OX=9823 GN=CCT7 PE=1 SV=1	CCT7	1	0.00481108	121.99	2	VPEEDLK(1)R	0.86087	1.35593	1.29214	1.47386	1.00951	0.372936	0.495629
Biological Process	GO:0044703	4	multi-organism reproductive process	1.33	0.0022856	D0G0C9	366	K	2.741	0.0191986	Up	T-complex protein 1 subunit eta OS=Sus scrofa OX=9823 GN=CCT7 PE=1 SV=1	CCT7	1	0.0104148	89.08	2	YNFFTGCPK(1)AK	0.94165	1.3551	1.53403	1.50718	0.855973	0.332861	0.414852
Biological Process	GO:0044703	4	multi-organism reproductive process	1.33	0.0022856	F1SE42	555	K	9.489	0.000708552	Up	ADAM3a(predicted) OS=Sus scrofa OX=9823 GN=ADAM3A PE=4 SV=2	ADAM3A	1	5.73728e-05	181.68	2	LVCHWK(1)HSQIVPK	-0.68297	1.25041	1.63841	2.53916	0.182972	0.232116	0.156932
Biological Process	GO:0044703	4	multi-organism reproductive process	1.33	0.0022856	D5K8A9	125	K	25.581	0.000750994	Up	Sperm acrosome membrane-associated protein 1 OS=Sus scrofa OX=9823 GN=SPACA1 PE=1 SV=1	SPACA1	1	7.48117e-69	347.6	2	GPVDCGWGK(1)PISENLESVR	-0.45778	1.68379	1.05455	3.03593	0.0971765	0.071138	0.0574145
Biological Process	GO:0044703	4	multi-organism reproductive process	1.33	0.0022856	F1RJL7	533	K	10.175	0.00270653	Up	Disintegrin and metalloproteinase domain-containing protein 9(predicted) OS=Sus scrofa OX=9823 PE=4 SV=4	--	1	4.4731e-68	336.68	2	LDGTPCQEK(1)NFCVGGLCR	0.17356	1.19555	1.22999	3.03756	0.23073	0.164927	0.141245
Biological Process	GO:0044703	4	multi-organism reproductive process	1.33	0.0022856	F1RK79	159	K	6.92	0.0126654	Up	Testis-specific serine kinase 2 OS=Sus scrofa OX=9823 GN=TSSK2 PE=2 SV=1	TSSK2	1	0.000262237	157.68	2	LSDFGFSK(1)R	0.17616	1.15127	1.12476	2.28459	0.274873	0.164514
Biological Process	GO:0044703	4	multi-organism reproductive process	1.33	0.0022856	F1RK80	246	K	5.942	0.00858106	Up	Testis specific serine kinase 1B OS=Sus scrofa OX=9823 GN=TSSK1B PE=2 SV=1	TSSK1B	1	1.66233e-13	251.34	2	HLTGECK(1)DLIYR	0.19078	1.37306	1.50117	2.2615	0.458862	0.272437	0.132968
Biological Process	GO:0044703	4	multi-organism reproductive process	1.33	0.0022856	F1RKX1	152	K	6.021	0.00574594	Up	Sperm acrosome membrane-associated protein 3 OS=Sus scrofa OX=9823 GN=SPACA3 PE=3 SV=2	SPACA3	1	1.07998e-34	296.27	2	HHCQGK(1)DLTDWVDGCDL	-0.25449	1.16827	1.31461	2.66252	0.400946	0.253484	0.200168
Biological Process	GO:0044703	4	multi-organism reproductive process	1.33	0.0022856	F1RKX1	137	K	6.876	0.00368345	Up	Sperm acrosome membrane-associated protein 3 OS=Sus scrofa OX=9823 GN=SPACA3 PE=3 SV=2	SPACA3	1	3.82664e-30	283.47	3	IAQDPK(1)GLGTWEAWR	-0.38517	1.4826	1.2886	2.46699	0.390577	0.200668	0.170563
Biological Process	GO:0044703	4	multi-organism reproductive process	1.33	0.0022856	F1RKX1	123	K	7.391	0.00161092	Up	Sperm acrosome membrane-associated protein 3 OS=Sus scrofa OX=9823 GN=SPACA3 PE=3 SV=2	SPACA3	1	9.26834e-09	117.94	3	NLNPSVPNLCQMYCSDLLNPNLK(1)DTIICAMK	-0.5425	1.15188	2.00061	2.13247	0.324464	0.180614	0.209955
Biological Process	GO:0044703	4	multi-organism reproductive process	1.33	0.0022856	F1RLA2	64	K	2.987	0.00767366	Up	Epididymal sperm-binding protein 1 OS=Sus scrofa OX=9823 GN=ELSPBP1 PE=4 SV=2	ELSPBP1	1	4.75567e-55	327.44	2	AVYDGQWK(1)YCLIEDYPR	0.19346	1.39993	1.31546	1.77985	0.723544	0.369524	0.411694
Biological Process	GO:0044703	4	multi-organism reproductive process	1.33	0.0022856	F1RLA2	202	K	19.651	0.000945913	Up	Epididymal sperm-binding protein 1 OS=Sus scrofa OX=9823 GN=ELSPBP1 PE=4 SV=2	ELSPBP1	1	1.26355e-09	153.56	4	GSK(1)ENLLWCATSYNYDQDHTWVYC	-0.46	1.40045	1.14506	3.16395	0.119868	0.0850344	0.0856455
Biological Process	GO:0044703	4	multi-organism reproductive process	1.33	0.0022856	F1RLA2	109	K	1.829	0.0166015	Up	Epididymal sperm-binding protein 1 OS=Sus scrofa OX=9823 GN=ELSPBP1 PE=4 SV=2	ELSPBP1	1	3.62902e-52	327.29	3	LWCSVTSSFDEK(1)QQWK	-2.882	1.22523	1.02365	1.63021	0.794319	0.673938	0.652654
Biological Process	GO:0044703	4	multi-organism reproductive process	1.33	0.0022856	D3K5M3	427	K	10.539	0.000461175	Up	A-kinase (PRKA) anchor protein 3 OS=Sus scrofa OX=9823 GN=AKAP3 PE=2 SV=1	AKAP3	1	0.000254134	155.06	2	NINFASMK(1)SEGK	-0.28727	1.59079	1.43137	2.45784	0.219671	0.130724	0.169603
Biological Process	GO:0042407	9	cristae formation	2.09	0.00232596	F1RPS8	204	K	13.971	0.00822167	Up	ATP synthase subunit alpha OS=Sus scrofa OX=9823 GN=ATP5F1A PE=1 SV=3	ATP5F1A	1	2.63052e-08	207.27	2	QTGK(1)TSIAIDTIINQK	-0.20179	1.65896	0.938535	3.00173	0.259749	0.0579558	0.0830745
Biological Process	GO:0090407	6	organophosphate biosynthetic process	1.41	0.00198558	F1RPU8	19	K	17.711	0.000499448	Up	Mitochondrial pyruvate carrier OS=Sus scrofa OX=9823 GN=MPC2 PE=1 SV=4	MPC2	1	0.000269522	140.24	2	VLDK(1)VELLLPEK	-0.36674	1.5011	1.40448	2.77375	0.136634	0.108465	0.0755768
Biological Process	GO:0090407	6	organophosphate biosynthetic process	1.41	0.00198558	F1SUF2	764	K	8.566	0.00169788	Up	Hexokinase OS=Sus scrofa OX=9823 GN=HK1 PE=1 SV=4	HK1	1	0.000222132	163.9	2	NILIDFTK(1)R	-0.61003	1.80752	1.57856	1.98667	0.340037	0.134225	0.152986
Biological Process	GO:0006637	11	acyl-CoA metabolic process	1.77	0.00133702	A0A5G2QIE6	367	K	18.394	2.74021e-05	Up	Acetyltransferase component of pyruvate dehydrogenase complex OS=Sus scrofa OX=9823 GN=DLAT PE=1 SV=1	DLAT	1	6.71423e-05	143.4	2	SK(1)ISVNDFIIK	0.035448	1.45822	2.10129	2.13112	0.0930524	0.105726	0.110598
Biological Process	GO:0006637	11	acyl-CoA metabolic process	1.77	0.00133702	A0A5S6FV10	132	K	5.587	4.02744e-06	Up	Dihydrolipoyllysine-residue succinyltransferase component of 2-oxoglutarate dehydrogenase complex, mitochondrial OS=Sus scrofa OX=9823 GN=DLST PE=3 SV=1	DLST	1	0.0311311	72.434	2	AK(1)PAEAPAAAAPK	-1.0013	1.58949	1.85452	1.64508	0.311255	0.295046	0.304612
Biological Process	GO:0006637	11	acyl-CoA metabolic process	1.77	0.00133702	A0A5G2QPK6	58	K	14.471	0.00105459	Up	Dihydrolipoyl dehydrogenase OS=Sus scrofa OX=9823 GN=DLD PE=1 SV=1	DLD	1	6.98919e-05	196.48	2	AAQLGFK(1)TVCIEK	0.0011054	1.63951	1.56697	2.40569	0.205739	0.0759641	0.106127
Biological Process	GO:0006637	11	acyl-CoA metabolic process	1.77	0.00133702	A0A5G2QPK6	96	K	7.669	0.00101237	Up	Dihydrolipoyl dehydrogenase OS=Sus scrofa OX=9823 GN=DLD PE=1 SV=1	DLD	1	6.69026e-49	313.04	4	ALLNNSHYYHMAHGK(1)DFASR	0.81498	1.90275	1.34769	2.05746	0.18081	0.180116	0.331169
Biological Process	GO:0006637	11	acyl-CoA metabolic process	1.77	0.00133702	A0A5G2QPK6	135	K	2.712	0.0179189	Up	Dihydrolipoyl dehydrogenase OS=Sus scrofa OX=9823 GN=DLD PE=1 SV=1	DLD	1	2.83008e-140	407.16	3	SNAVK(1)ALTGGIAHLFK(1)QNK	-0.511	1.39969	1.94509	1.03871	0.37931	0.71524	0.52196
Biological Process	GO:0006637	11	acyl-CoA metabolic process	1.77	0.00133702	A0A5G2QPK6	409	K	4.416	0.00806848	Up	Dihydrolipoyl dehydrogenase OS=Sus scrofa OX=9823 GN=DLD PE=1 SV=1	DLD	1	9.81057e-41	315.21	2	EEGIEYK(1)VGK	0.0090722	1.65767	1.73328	1.50127	0.597975	0.312334	0.197473
Biological Process	GO:0006637	11	acyl-CoA metabolic process	1.77	0.00133702	A0A5G2QPK6	269	K	10.152	0.000750656	Up	Dihydrolipoyl dehydrogenase OS=Sus scrofa OX=9823 GN=DLD PE=1 SV=1	DLD	1	0.00021351	178.55	2	LNTK(1)VIGATK	-0.50256	1.41263	1.84138	2.20799	0.246217	0.175624	0.11616
Biological Process	GO:0006637	11	acyl-CoA metabolic process	1.77	0.00133702	A0A5G2QPK6	338	K	5.662	0.00569049	Up	Dihydrolipoyl dehydrogenase OS=Sus scrofa OX=9823 GN=DLD PE=1 SV=1	DLD	1	2.12613e-09	154.65	3	FQTK(1)IPNIYAIGDVVAGPMLAHK	-0.4543	1.04519	1.32725	2.7269	0.242605	0.311758	0.346298
Biological Process	GO:0006637	11	acyl-CoA metabolic process	1.77	0.00133702	A0A5G2QPK6	259	K	4.306	0.00171738	Up	Dihydrolipoyl dehydrogenase OS=Sus scrofa OX=9823 GN=DLD PE=1 SV=1	DLD	1	0.000942284	135.83	2	ILQK(1)QGFK(1)FK	-0.29711	1.38859	1.8666	1.61407	0.515362	0.282005	0.333363
Biological Process	GO:0006637	11	acyl-CoA metabolic process	1.77	0.00133702	A0A5G2QIE6	270	K	8.54	0.0212944	Up	Acetyltransferase component of pyruvate dehydrogenase complex OS=Sus scrofa OX=9823 GN=DLAT PE=1 SV=1	DLAT	1	4.7975e-11	229.29	2	GIDLTQIK(1)GTGPDGR	-0.11319	1.09551	1.33998	2.20244	0.27587	0.0862052
Biological Process	GO:0006637	11	acyl-CoA metabolic process	1.77	0.00133702	A0A5G2QPK6	151	K	12.703	0.000528701	Up	Dihydrolipoyl dehydrogenase OS=Sus scrofa OX=9823 GN=DLD PE=1 SV=1	DLD	1	5.05413e-10	201.61	3	ITGK(1)NQVTATK(1)ADGSTEVINTK	0.16389	1.75435	1.80692	2.00089	0.222108	0.0946223	0.121115
Biological Process	GO:0006637	11	acyl-CoA metabolic process	1.77	0.00133702	A0A5G2QPK6	119	K	12.123	0.00472041	Up	Dihydrolipoyl dehydrogenase OS=Sus scrofa OX=9823 GN=DLD PE=1 SV=1	DLD	1	9.06167e-05	179.1	2	MMEQK(1)SNAVK	-0.32445	1.39617	0.839096	3.30751	0.181401	0.130613	0.145213
Biological Process	GO:0006637	11	acyl-CoA metabolic process	1.77	0.00133702	A0A5G2QPK6	124	K	11.949	0.0040856	Up	Dihydrolipoyl dehydrogenase OS=Sus scrofa OX=9823 GN=DLD PE=1 SV=1	DLD	1	1.49524e-09	167.14	3	SNAVK(1)ALTGGIAHLFK(1)QNK	-0.511	2.07125	0.955968	1.70857	0.123067	0.141145
Biological Process	GO:0006637	11	acyl-CoA metabolic process	1.77	0.00133702	A0A5G2QPK6	402	K	2.117	0.0256796	Up	Dihydrolipoyl dehydrogenase OS=Sus scrofa OX=9823 GN=DLD PE=1 SV=1	DLD	1	6.03025e-06	209.19	2	SEEQLK(1)EEGIEYK	0.28517	1.32037	1.83202	0.922558	0.625911	0.712405	0.586733
Biological Process	GO:0006637	11	acyl-CoA metabolic process	1.77	0.00133702	A0A5G2QSG9	137	K	31.739	0.00077276	Up	Dihydrolipoamide acetyltransferase component of pyruvate dehydrogenase complex OS=Sus scrofa OX=9823 GN=PDHX PE=1 SV=1	PDHX	1	2.03991e-20	220.6	2	LGSLIGLLVEEGEDWK(1)HVEIPK	0.30876	1.78794	2.60606	1.42273	0.0933109	0.0290634	0.0608926
Biological Process	GO:0006637	11	acyl-CoA metabolic process	1.77	0.00133702	A0A5G2QSG9	311	K	11.655	0.000159381	Up	Dihydrolipoamide acetyltransferase component of pyruvate dehydrogenase complex OS=Sus scrofa OX=9823 GN=PDHX PE=1 SV=1	PDHX	1	1.62774e-104	382.95	4	STIPHAYATADCDLGAVLK(1)VR	-1.6514	1.89385	1.45841	2.17363	0.200507	0.146317	0.127292
Biological Process	GO:0006637	11	acyl-CoA metabolic process	1.77	0.00133702	A0A5G2QSG9	191	K	20.177	0.000113065	Up	Dihydrolipoamide acetyltransferase component of pyruvate dehydrogenase complex OS=Sus scrofa OX=9823 GN=PDHX PE=1 SV=1	PDHX	1	4.28436e-139	427.61	3	NILEK(1)HALDANQGTATGPR	0.1433	1.54938	2.28695	1.88034	0.124763	0.0705528	0.0880149
Biological Process	GO:0006637	11	acyl-CoA metabolic process	1.77	0.00133702	A0A5G2QSG9	170	K	7.66	0.00876038	Up	Dihydrolipoamide acetyltransferase component of pyruvate dehydrogenase complex OS=Sus scrofa OX=9823 GN=PDHX PE=1 SV=1	PDHX	1	0.00244504	75.533	3	PSVPPPPSPQPQISTPVK(1)K	0.24889		2.09625	1.44186	0.238889		0.223003
Biological Process	GO:0006637	11	acyl-CoA metabolic process	1.77	0.00133702	A0A5G2R718	34	K	6.023	0.0316931	Up	Pyruvate dehydrogenase E1 component subunit beta OS=Sus scrofa OX=9823 GN=PDHB PE=1 SV=1	PDHB	1	1.04594e-20	167.61	4	DAINQGMDEELERDEK(1)VFLLGEEVAQYDGAYK	-0.31808	1.03207	2.48971	0.97998	0.326682		0.171565
Biological Process	GO:0006637	11	acyl-CoA metabolic process	1.77	0.00133702	A0A5G2R718	50	K	6.433	0.000338382	Up	Pyruvate dehydrogenase E1 component subunit beta OS=Sus scrofa OX=9823 GN=PDHB PE=1 SV=1	PDHB	1	2.1295e-55	321.67	3	VFLLGEEVAQYDGAYK(1)VSR	-0.11923	1.30726	1.5305	1.69276	0.241922	0.227567
Biological Process	GO:0006637	11	acyl-CoA metabolic process	1.77	0.00133702	A0A5G2QPK6	158	K	21.78	0.00019812	Up	Dihydrolipoyl dehydrogenase OS=Sus scrofa OX=9823 GN=DLD PE=1 SV=1	DLD	1	9.13913e-100	377.19	2	NQVTATK(1)ADGSTEVINTK	-0.156	1.61789	2.19801	1.92072	0.121481	0.0855181	0.0563852
Biological Process	GO:0006637	11	acyl-CoA metabolic process	1.77	0.00133702	A0A5G2QGS5	262	K	25.223	0.000792457	Up	Acetyl-CoA acetyltransferase 1 OS=Sus scrofa OX=9823 GN=ACAT1 PE=1 SV=1	ACAT1	1	0.00402759	132.57	2	VDFNK(1)VPK	0.10583	1.23796	1.78037	1.85292		0.0781217	0.050632
Biological Process	GO:0006637	11	acyl-CoA metabolic process	1.77	0.00133702	A0A5G2QGS5	222	K	11.922	0.00257753	Up	Acetyl-CoA acetyltransferase 1 OS=Sus scrofa OX=9823 GN=ACAT1 PE=1 SV=1	ACAT1	1	0.0158276	91.085	2	SK(1)AAWEAGK	-0.74953	2.24838	2.19285		0.26981	0.14756	0.141401
Biological Process	GO:0006637	11	acyl-CoA metabolic process	1.77	0.00133702	A0A5G2QGS5	123	K	2.893	0.00648098	Up	Acetyl-CoA acetyltransferase 1 OS=Sus scrofa OX=9823 GN=ACAT1 PE=1 SV=1	ACAT1	1	4.41462e-10	151.42	3	QAVLGAGLPISTPCTTINK(1)VCASGMK	1.4209	1.05519	1.54805	1.46041	0.464522		0.471823
Biological Process	GO:0006637	11	acyl-CoA metabolic process	1.77	0.00133702	F1RK10	50	K	9.942	0.000113281	Up	Succinate--CoA ligase [ADP-forming] subunit beta, mitochondrial OS=Sus scrofa OX=9823 GN=SUCLA2 PE=1 SV=3	SUCLA2	1	0.00101433	127.4	2	GK(1)GTFESGLK	0.097095	1.69445	1.62331	1.36805	0.154362		0.159834
Biological Process	GO:0006637	11	acyl-CoA metabolic process	1.77	0.00133702	F1RK10	35	K	9.408	0.0159815	Up	Succinate--CoA ligase [ADP-forming] subunit beta, mitochondrial OS=Sus scrofa OX=9823 GN=SUCLA2 PE=1 SV=3	SUCLA2	1	0.00363903	126.39	2	LGSK(1)DVVIK	0.28794	1.3637	1.50613	1.79932	0.259564		0.0712916
Biological Process	GO:0006637	11	acyl-CoA metabolic process	1.77	0.00133702	F1RK10	85	K	9.477	0.0109903	Up	Succinate--CoA ligase [ADP-forming] subunit beta, mitochondrial OS=Sus scrofa OX=9823 GN=SUCLA2 PE=1 SV=3	SUCLA2	1	0.00142966	132.76	2	LFTK(1)QTGEK	0.70056	1.3525	1.77333	1.54557	0.246634		0.0819707
Biological Process	GO:0006637	11	acyl-CoA metabolic process	1.77	0.00133702	A0A287B410	397	K	11.191	0.000349983	Up	Oxoglutarate dehydrogenase (succinyl-transferring) OS=Sus scrofa OX=9823 GN=OGDH PE=1 SV=1	OGDH	1	6.66516e-06	204.17	2	AEQFYCGDTEGK(1)K	-1.9287	1.48676	2.05329	1.96778	0.215892	0.111823	0.164455
Biological Process	GO:0006637	11	acyl-CoA metabolic process	1.77	0.00133702	A0A287B410	332	K	12.984	0.00722849	Up	Oxoglutarate dehydrogenase (succinyl-transferring) OS=Sus scrofa OX=9823 GN=OGDH PE=1 SV=1	OGDH	1	2.14534e-18	187.62	3	ELEQIFCQFDSK(1)LEAADEGSGDVK	0.069913	1.68382	1.85743	2.0297	0.20778	0.183789	0.0374786
Biological Process	GO:0006637	11	acyl-CoA metabolic process	1.77	0.00133702	A0A287B410	856	K	11.371	0.029403	Up	Oxoglutarate dehydrogenase (succinyl-transferring) OS=Sus scrofa OX=9823 GN=OGDH PE=1 SV=1	OGDH	1	0.000954733	176.62	2	KPLIIFTPK(1)SLLR	0.32948	1.17411	1.22931	2.31967	0.233372	0.043537
Biological Process	GO:0006637	11	acyl-CoA metabolic process	1.77	0.00133702	A0A287B410	530	K	7.263	0.0333406	Up	Oxoglutarate dehydrogenase (succinyl-transferring) OS=Sus scrofa OX=9823 GN=OGDH PE=1 SV=1	OGDH	1	0.0188811	117.62	2	QK(1)PVLQK	0.070136	1.42474	2.09118		0.318124		0.165958
Biological Process	GO:0006637	11	acyl-CoA metabolic process	1.77	0.00133702	A0A287B410	74	K	27.141	8.5868e-06	Up	Oxoglutarate dehydrogenase (succinyl-transferring) OS=Sus scrofa OX=9823 GN=OGDH PE=1 SV=1	OGDH	1	8.29002e-09	236.35	2	SVHK(1)SWDIFFR	0.43754	1.83248	2.0545	1.8998	0.0857363	0.0687417	0.0587335
Biological Process	GO:0006637	11	acyl-CoA metabolic process	1.77	0.00133702	A0A287B410	895	K	22.201	1.3865e-05	Up	Oxoglutarate dehydrogenase (succinyl-transferring) OS=Sus scrofa OX=9823 GN=OGDH PE=1 SV=1	OGDH	1	6.82848e-11	194.7	2	VIPEDGPAAQNPENVK(1)R	-0.085366	1.66715	2.26572	1.80852	0.0958699	0.0735664	0.089168
Biological Process	GO:0006637	11	acyl-CoA metabolic process	1.77	0.00133702	A0A287B410	560	K	5.441	0.00038105	Up	Oxoglutarate dehydrogenase (succinyl-transferring) OS=Sus scrofa OX=9823 GN=OGDH PE=1 SV=1	OGDH	1	0.000312515	192.26	2	YDK(1)ICEEAFAR	0.10045	1.66333	1.8309	1.5743	0.403795	0.244742	0.282931
Biological Process	GO:0006637	11	acyl-CoA metabolic process	1.77	0.00133702	F1SED0	425	K	11.718	0.000265981	Up	Acyl-CoA dehydrogenase short/branched chain OS=Sus scrofa OX=9823 GN=ACADSB PE=1 SV=4	ACADSB	1	1.34896e-123	409.14	3	IGTIYEGTSNIQLNTIAK(1)NVSK	3.0881	2.04105	1.63397	1.8532	0.110133	0.21613	0.145512
Biological Process	GO:0006637	11	acyl-CoA metabolic process	1.77	0.00133702	A0A287B574	69	K	13.454	0.000809585	Up	Succinate--CoA ligase [ADP/GDP-forming] subunit alpha, mitochondrial OS=Sus scrofa OX=9823 GN=SUCLG1 PE=3 SV=2	SUCLG1	1	1.5541e-51	318.7	2	GGK(1)THLGLPVFNTVK	-0.4171	2.52201	1.47741	1.58546	0.206454	0.0946707	0.113987
Biological Process	GO:0006637	11	acyl-CoA metabolic process	1.77	0.00133702	A0A287B574	30	K	6.626	0.00102062	Up	Succinate--CoA ligase [ADP/GDP-forming] subunit alpha, mitochondrial OS=Sus scrofa OX=9823 GN=SUCLG1 PE=3 SV=2	SUCLG1	1	0.000948802	138.4	2	HLYVDK(1)NTK	-2.4741	1.27191	1.864	2.07731	0.35322	0.224493	0.209062
Biological Process	GO:0006637	11	acyl-CoA metabolic process	1.77	0.00133702	A0A287B574	168	K	5.747	0.00102914	Up	Succinate--CoA ligase [ADP/GDP-forming] subunit alpha, mitochondrial OS=Sus scrofa OX=9823 GN=SUCLG1 PE=3 SV=2	SUCLG1	1	0.00068043	125.31	2	IGIMPGHIHK(1)K	-0.50267	1.50735	1.58892	1.384	0.303875	0.215854
Biological Process	GO:0006637	11	acyl-CoA metabolic process	1.77	0.00133702	A0A287B574	24	K	21.156	0.000678481	Up	Succinate--CoA ligase [ADP/GDP-forming] subunit alpha, mitochondrial OS=Sus scrofa OX=9823 GN=SUCLG1 PE=3 SV=2	SUCLG1	1	0.0109422	131.03	2	K(1)HLYVDK	-2.3891	1.51417	1.92575	2.28927	0.150025	0.0646773	0.0561104
Biological Process	GO:0006637	11	acyl-CoA metabolic process	1.77	0.00133702	A0A480V3W7	175	K	15.847	0.00208505	Up	Acyl-CoA thioesterase 9 OS=Sus scrofa OX=9823 GN=ACOT9 PE=1 SV=1	ACOT9	1	0.00119203	90.561	3	FSGHVSWVGK(1)TSMEVK	-0.1668	1.44618	1.46584	1.88613	0.134303		0.0675459
Biological Process	GO:0006637	11	acyl-CoA metabolic process	1.77	0.00133702	A0A480V3W7	293	K	22.1	0.000183032	Up	Acyl-CoA thioesterase 9 OS=Sus scrofa OX=9823 GN=ACOT9 PE=1 SV=1	ACOT9	1	2.24141e-08	221.8	3	LK(1)SLDICHPQER	0.83228	1.60489	1.82551	2.30985	0.12258	0.0600394	0.0771232
Biological Process	GO:0006637	11	acyl-CoA metabolic process	1.77	0.00133702	A0A5G2QGS5	189	K	7.57	0.00461557	Up	Acetyl-CoA acetyltransferase 1 OS=Sus scrofa OX=9823 GN=ACAT1 PE=1 SV=1	ACAT1	1	1.45144e-17	199.61	3	DGLTDVYNK(1)IHMGNCAENTAK	-0.045735	2.1555	2.01764		0.377836	0.183822	0.265202
Biological Process	GO:0006637	11	acyl-CoA metabolic process	1.77	0.00133702	A0A5G2QGS5	244	K	12.716	0.000615442	Up	Acetyl-CoA acetyltransferase 1 OS=Sus scrofa OX=9823 GN=ACAT1 PE=1 SV=1	ACAT1	1	9.35826e-08	212.59	2	GK(1)PDTVVKEDEEYKR	-0.14921	1.5701	1.94238	2.05008	0.221611	0.121732	0.0940989
Biological Process	GO:0006637	11	acyl-CoA metabolic process	1.77	0.00133702	A0A5G2QGS5	250	K	11.974	0.0032655	Up	Acetyl-CoA acetyltransferase 1 OS=Sus scrofa OX=9823 GN=ACAT1 PE=1 SV=1	ACAT1	1	8.23212e-40	308.74	2	GKPDTVVK(1)EDEEYKR	0.19203	1.50355	1.55256	1.68019	0.181169		0.0825359
Biological Process	GO:0006637	11	acyl-CoA metabolic process	1.77	0.00133702	A0A5G2QGS5	267	K	12.183	0.0100254	Up	Acetyl-CoA acetyltransferase 1 OS=Sus scrofa OX=9823 GN=ACAT1 PE=1 SV=1	ACAT1	1	0.00533267	173.11	2	LK(1)TVFQK	0.48107	1.52684	1.38348	1.83026	0.198907		0.0605114
Biological Process	GO:0006637	11	acyl-CoA metabolic process	1.77	0.00133702	A0A5G2R718	336	K	25.703	0.000583753	Up	Pyruvate dehydrogenase E1 component subunit beta OS=Sus scrofa OX=9823 GN=PDHB PE=1 SV=1	PDHB	1	0.0255332	92.307	3	ILEDNSVPQVK(1)DIIFAIK(1)K	0.31701	1.47854	1.75327	2.5435	0.122807	0.0521125	0.0497732
Biological Process	GO:0006637	11	acyl-CoA metabolic process	1.77	0.00133702	F1RK10	157	K	8.372	0.0144662	Up	Succinate--CoA ligase [ADP-forming] subunit beta, mitochondrial OS=Sus scrofa OX=9823 GN=SUCLA2 PE=1 SV=3	SUCLA2	1	0.000252942	150.81	2	EPIDIVEGIK(1)K	-0.30176	1.08762	1.57797	1.96561	0.269359	0.0994472
Biological Process	GO:0006637	11	acyl-CoA metabolic process	1.77	0.00133702	A0A5G2R718	170	K	11.034	0.000616898	Up	Pyruvate dehydrogenase E1 component subunit beta OS=Sus scrofa OX=9823 GN=PDHB PE=1 SV=1	PDHB	1	0.00690861	120.65	2	GLIK(1)SAIR	-0.50635	1.84458	1.33623	2.32059	0.233349	0.133349	0.131903
Biological Process	GO:0006637	11	acyl-CoA metabolic process	1.77	0.00133702	A0A5G2R718	166	K	14.707	0.00444135	Up	Pyruvate dehydrogenase E1 component subunit beta OS=Sus scrofa OX=9823 GN=PDHB PE=1 SV=1	PDHB	1	8.42777e-07	162.68	3	VVSPWSSEDAK(1)GLIK	-0.13568	1.72959		2.80764	0.214388	0.151972	0.0964119
Biological Process	GO:0044782	7	cilium organization	1.52	0.00155348	A0A286ZWH7	145	K	16.075	0.00132114	Up	A-kinase anchoring protein 4 OS=Sus scrofa OX=9823 GN=AKAP4 PE=3 SV=2	AKAP4	1	6.64786e-77	293.19	4	HK(1)VGDTEGECHQLHSGNCYSVYADQLNMDYMANGPQNLR	3.0286	1.4825	1.99628	2.16982	0.199774	0.0632776	0.0883477
Biological Process	GO:0044782	7	cilium organization	1.52	0.00155348	A0A286ZWH7	382	K	10.915	0.000796362	Up	A-kinase anchoring protein 4 OS=Sus scrofa OX=9823 GN=AKAP4 PE=3 SV=2	AKAP4	1	1.36379e-115	408.57	2	HTK(1)EIVSDLIDSCMK	-0.018161	1.3453	1.36054	2.79059	0.186585	0.141425	0.175556
Biological Process	GO:0044782	7	cilium organization	1.52	0.00155348	A0A286ZWH7	305	K	8.608	0.000287665	Up	A-kinase anchoring protein 4 OS=Sus scrofa OX=9823 GN=AKAP4 PE=3 SV=2	AKAP4	1	2.0346e-05	210.27	2	K(1)TFLYSELSNK(1)NK	1.3031	1.30317	1.67907	2.39329	0.217493	0.196941	0.210035
Biological Process	GO:0044782	7	cilium organization	1.52	0.00155348	A0A286ZWH7	315	K	9.983	0.00278046	Up	A-kinase anchoring protein 4 OS=Sus scrofa OX=9823 GN=AKAP4 PE=3 SV=2	AKAP4	1	2.74215e-13	246.41	2	TFLYSELSNK(1)NK	0.94352	1.34005	1.3053	2.80835	0.262736	0.113524	0.17004
Biological Process	GO:0044782	7	cilium organization	1.52	0.00155348	A0A286ZWH7	720	K	11.118	0.00184411	Up	A-kinase anchoring protein 4 OS=Sus scrofa OX=9823 GN=AKAP4 PE=3 SV=2	AKAP4	1	2.16906e-13	249.03	2	LCLIMAK(1)YSNNR	0.1232	1.84186	1.35942	1.51587	0.104054		0.178791
Biological Process	GO:0044782	7	cilium organization	1.52	0.00155348	A0A286ZWH7	251	K	2.753	0.00153908	Up	A-kinase anchoring protein 4 OS=Sus scrofa OX=9823 GN=AKAP4 PE=3 SV=2	AKAP4	1	3.5157e-07	130	3	LEGGSK(1)CLHHSIYPPSGDK	2.4963	1.14511	1.47079	1.78552	0.516422	0.535683	0.546479
Biological Process	GO:0044782	7	cilium organization	1.52	0.00155348	A0A286ZWH7	189	K	12.126	0.00793092	Up	A-kinase anchoring protein 4 OS=Sus scrofa OX=9823 GN=AKAP4 PE=3 SV=2	AKAP4	1	2.45295e-05	113.63	3	LEMTASK(1)NTNNNQSPSTPPAK	-0.073316	1.42267	1.24291	2.07385	0.0724343		0.188138
Biological Process	GO:0044782	7	cilium organization	1.52	0.00155348	A0A286ZWH7	661	K	61.324	0.000144923	Up	A-kinase anchoring protein 4 OS=Sus scrofa OX=9823 GN=AKAP4 PE=3 SV=2	AKAP4	1	8.47928e-184	453.47	3	LLGESPFHCEDLCEGENK(1)R	0.35807	1.15329	1.8429	2.90755	0.0390561	0.0278876	0.0293276
Biological Process	GO:0044782	7	cilium organization	1.52	0.00155348	A0A286ZWH7	444	K	14.769	3.26689e-05	Up	A-kinase anchoring protein 4 OS=Sus scrofa OX=9823 GN=AKAP4 PE=3 SV=2	AKAP4	1	1.83518e-05	207.29	3	LVSALLGEK(1)R	-0.32893	1.62458	1.70227	2.29266	0.144376	0.112371	0.123736
Biological Process	GO:0044782	7	cilium organization	1.52	0.00155348	A0A286ZWH7	31	K	22.752	0.000475261	Up	A-kinase anchoring protein 4 OS=Sus scrofa OX=9823 GN=AKAP4 PE=3 SV=2	AKAP4	1	6.08477e-27	277.31	3	GMCK(1)VDLYSPTGQQDQDRK	-0.46962	1.97625	1.12877	2.64237	0.112583	0.072063	0.0679667
Biological Process	GO:0044782	7	cilium organization	1.52	0.00155348	A0A286ZWH7	527	K	12.12	0.0178974	Up	A-kinase anchoring protein 4 OS=Sus scrofa OX=9823 GN=AKAP4 PE=3 SV=2	AKAP4	1	0.000104946	143.03	2	MASK(1)PCISNK	0.64829	1.2612		2.43393		0.14622	0.15865
Biological Process	GO:0044782	7	cilium organization	1.52	0.00155348	A0A286ZWH7	489	K	26.717	0.00150584	Up	A-kinase anchoring protein 4 OS=Sus scrofa OX=9823 GN=AKAP4 PE=3 SV=2	AKAP4	1	4.31139e-06	215.34	2	MK(1)PEECK(1)PLTSAEK	-1.0084	1.52955	0.883659	3.37031	0.0650811	0.0609341	0.0904571
Biological Process	GO:0044782	7	cilium organization	1.52	0.00155348	A0A286ZWH7	434	K	3.304	0.00635604	Up	A-kinase anchoring protein 4 OS=Sus scrofa OX=9823 GN=AKAP4 PE=3 SV=2	AKAP4	1	3.1256e-20	267.57	2	QNAADIMEAMLK(1)R	-0.041413	1.59191	1.47868			0.423629	0.505779
Biological Process	GO:0044782	7	cilium organization	1.52	0.00155348	A0A286ZWH7	374	K	8.493	0.00571529	Up	A-kinase anchoring protein 4 OS=Sus scrofa OX=9823 GN=AKAP4 PE=3 SV=2	AKAP4	1	3.31554e-30	291.57	3	VHSSGK(1)PIPACMVLK(1)R	0.82975	1.14327	1.08706	3.13765	0.172836	0.180637	0.278544
Biological Process	GO:0044782	7	cilium organization	1.52	0.00155348	A0A286ZWH7	98	K	36.44	0.000778339	Up	A-kinase anchoring protein 4 OS=Sus scrofa OX=9823 GN=AKAP4 PE=3 SV=2	AKAP4	1	5.70431e-39	311.76	2	QDQSK(1)TEGSVCLFK	-1.0167	1.56904	1.30211	2.96859	0.0768466	0.0274697	0.0559411
Biological Process	GO:0044782	7	cilium organization	1.52	0.00155348	A0A286ZWH7	379	K	19.577	0.000162516	Up	A-kinase anchoring protein 4 OS=Sus scrofa OX=9823 GN=AKAP4 PE=3 SV=2	AKAP4	1	1.42086e-11	187.06	2	VLLK(1)HTK	0.18847	1.85556	1.34935	2.50351	0.118482	0.0781199	0.0949862
Biological Process	GO:0044782	7	cilium organization	1.52	0.00155348	A0A286ZWH7	365	K	7.696	0.00903594	Up	A-kinase anchoring protein 4 OS=Sus scrofa OX=9823 GN=AKAP4 PE=3 SV=2	AKAP4	1	2.27248e-06	146.79	3	VHSSGK(1)PIPACMVLK(1)R	0.82975	1.39864	0.979601	2.93179	0.142211	0.187541	0.360218
Biological Process	GO:0044782	7	cilium organization	1.52	0.00155348	A0A286ZWH7	508	K	8.899	0.00288638	Up	A-kinase anchoring protein 4 OS=Sus scrofa OX=9823 GN=AKAP4 PE=3 SV=2	AKAP4	1	1.24709e-11	234.04	3	VGEHILK(1)ESLTMWNQK	-0.48529	1.29837	1.49654	2.59896	0.136651	0.151059	0.318427
Biological Process	GO:0044782	7	cilium organization	1.52	0.00155348	A0A286ZWH7	143	K	22.885	0.00339062	Up	A-kinase anchoring protein 4 OS=Sus scrofa OX=9823 GN=AKAP4 PE=3 SV=2	AKAP4	1	3.89589e-69	351.03	2	YALGFQHALSPSASSCK(1)HK	0.03494	1.4111	1.80191	1.64546		0.0383301	0.103206
Biological Process	GO:0044782	7	cilium organization	1.52	0.00155348	A0A5G2RE71	304	K	4.851	0.00133816	Up	Actin related protein 2 OS=Sus scrofa OX=9823 GN=ACTR2 PE=1 SV=1	ACTR2	1	6.61194e-18	199.89	3	SEFYK(1)HIVLSGGSTMYPGLPSR	-0.38191	1.56038	1.1821	1.65338	0.305638		0.298503
Biological Process	GO:0044782	7	cilium organization	1.52	0.00155348	A0A286ZWH7	533	K	154.429	0.00200602	Up	A-kinase anchoring protein 4 OS=Sus scrofa OX=9823 GN=AKAP4 PE=3 SV=2	AKAP4	1	2.72774e-06	212.39	2	PCISNK(1)EEK	-0.89916	1.25448	0.842468	2.88156	0.0090902		0.0124019
Biological Process	GO:0044782	7	cilium organization	1.52	0.00155348	A0A286ZWH7	570	K	28.264	9.55936e-05	Up	A-kinase anchoring protein 4 OS=Sus scrofa OX=9823 GN=AKAP4 PE=3 SV=2	AKAP4	1	9.89017e-149	416.41	3	GK(1)DAFEDDCPGSTMGYMTQSAQYEK	-0.41998	1.94307	1.56313	2.28877	0.0857405	0.0464784	0.0728103
Biological Process	GO:0044782	7	cilium organization	1.52	0.00155348	A0A286ZWH7	414	K	5.987	0.000980642	Up	A-kinase anchoring protein 4 OS=Sus scrofa OX=9823 GN=AKAP4 PE=3 SV=2	AKAP4	1	5.44117e-188	454.08	3	NLHNITGVLMTDSDFVSAVK(1)R	2.3588	1.51825	1.33032	2.29268	0.36076	0.251898	0.246095
Biological Process	GO:0044782	7	cilium organization	1.52	0.00155348	A0A286ZWH7	467	K	21.326	0.000453244	Up	A-kinase anchoring protein 4 OS=Sus scrofa OX=9823 GN=AKAP4 PE=3 SV=2	AKAP4	1	7.04375e-28	283.82	2	CK(1)NQSLEFSAMK	2.1551	1.31075	1.43999	2.98051	0.0752059	0.0830729	0.110466
Biological Process	GO:0006637	11	acyl-CoA metabolic process	1.77	0.00133702	F1RPU8	19	K	17.711	0.000499448	Up	Mitochondrial pyruvate carrier OS=Sus scrofa OX=9823 GN=MPC2 PE=1 SV=4	MPC2	1	0.000269522	140.24	2	VLDK(1)VELLLPEK	-0.36674	1.5011	1.40448	2.77375	0.136634	0.108465	0.0755768
Biological Process	GO:0006637	11	acyl-CoA metabolic process	1.77	0.00133702	I3LCI2	244	K	14.326	7.06486e-05	Up	Pyruvate dehydrogenase E1 component subunit alpha OS=Sus scrofa OX=9823 GN=PDHA1 PE=1 SV=2	PDHA1	1	0.000402517	172.21	2	AAASTDYYK(1)R	0.24715	2.1465	1.89941	1.56258	0.162102	0.104595	0.124807
Biological Process	GO:0006637	11	acyl-CoA metabolic process	1.77	0.00133702	I3LCI2	83	K	2.468	0.0111998	Up	Pyruvate dehydrogenase E1 component subunit alpha OS=Sus scrofa OX=9823 GN=PDHA1 PE=1 SV=2	PDHA1	1	2.11455e-13	245.15	3	RMELK(1)ADQLYK(1)QK	-0.75819	1.26937	1.80276	1.19758	0.410631	0.633634	0.686031
Biological Process	GO:0006637	11	acyl-CoA metabolic process	1.77	0.00133702	I3LCI2	85	K	9.005	0.000162366	Up	Pyruvate dehydrogenase E1 component subunit alpha OS=Sus scrofa OX=9823 GN=PDHA1 PE=1 SV=2	PDHA1	1	0.000436708	138.22	2	ADQLYK(1)QK(1)IIR	-0.94509	1.44813	1.61689	2.33528	0.182028	0.226178	0.19149
Biological Process	GO:0006637	11	acyl-CoA metabolic process	1.77	0.00133702	I3LCI2	149	K	30.357	0.00264492	Up	Pyruvate dehydrogenase E1 component subunit alpha OS=Sus scrofa OX=9823 GN=PDHA1 PE=1 SV=2	PDHA1	1	0.000497327	166.66	2	GK(1)GGSMHMYAK	-0.26957	1.20887	1.1745	2.50919		0.0416124	0.0658308
Biological Process	GO:0006637	11	acyl-CoA metabolic process	1.77	0.00133702	I3LCI2	77	K	7.793	0.000756203	Up	Pyruvate dehydrogenase E1 component subunit alpha OS=Sus scrofa OX=9823 GN=PDHA1 PE=1 SV=2	PDHA1	1	2.11455e-13	245.15	3	RMELK(1)ADQLYK(1)QK	-0.75819	1.64932	1.96265	1.70571	0.290556	0.25052	0.141251
Biological Process	GO:0006637	11	acyl-CoA metabolic process	1.77	0.00133702	I3LCI2	321	K	7.822	0.000142572	Up	Pyruvate dehydrogenase E1 component subunit alpha OS=Sus scrofa OX=9823 GN=PDHA1 PE=1 SV=2	PDHA1	1	7.16903e-05	200.93	2	SK(1)SDPIMLLK(1)DR	-0.73938	1.52532	2.28207	1.51246	0.220389	0.247774	0.211984
Biological Process	GO:0006637	11	acyl-CoA metabolic process	1.77	0.00133702	I3LCI2	277	K	5.209	0.00236988	Up	Pyruvate dehydrogenase E1 component subunit alpha OS=Sus scrofa OX=9823 GN=PDHA1 PE=1 SV=2	PDHA1	1	2.82417e-14	251.03	2	SGK(1)GPILMELQTYR	2.0211	1.31828	1.80506	1.30939		0.244799	0.322474
Biological Process	GO:0006637	11	acyl-CoA metabolic process	1.77	0.00133702	I3LCI2	313	K	13.059	0.000364323	Up	Pyruvate dehydrogenase E1 component subunit alpha OS=Sus scrofa OX=9823 GN=PDHA1 PE=1 SV=2	PDHA1	1	4.7682e-05	200.93	2	SK(1)SDPIMLLK(1)DR	-0.73938	1.98833	2.05998	1.5249	0.20686	0.115592	0.104335
Biological Process	GO:0006637	11	acyl-CoA metabolic process	1.77	0.00133702	D2D0E6	151	K	8.729	0.00142869	Up	Malonyl-CoA decarboxylase OS=Sus scrofa OX=9823 GN=MLYCD PE=4 SV=1	MLYCD	1	0.0136598	61.657	3	SLFHHISK(1)LDGGVR	-2.578	1.93742	1.65143			0.209281	0.201865
Biological Process	GO:0006637	11	acyl-CoA metabolic process	1.77	0.00133702	F1RS43	434	K	10.198	0.000278666	Up	3-oxoacyl-[acyl-carrier-protein] synthase, mitochondrial OS=Sus scrofa OX=9823 GN=OXSM PE=3 SV=3	OXSM	1	0.0255005	92.653	2	AQEWK(1)TEK	-0.0062196	1.6265	1.57715	1.48955	0.1764		0.130397
Biological Process	GO:0006637	11	acyl-CoA metabolic process	1.77	0.00133702	F1RUE0	17	K	62.725	3.63158e-06	Up	Acyl-CoA thioesterase 13 OS=Sus scrofa OX=9823 GN=ACOT13 PE=1 SV=2	ACOT13	1	0.000102791	171.36	2	LLGK(1)SSCFDR	-0.24855	1.84255	1.71739	2.3459	0.031943	0.0346195	0.0275915
Biological Process	GO:0006637	11	acyl-CoA metabolic process	1.77	0.00133702	F1S0N2	583	K	3.294	0.0244049	Up	ATP-citrate synthase OS=Sus scrofa OX=9823 GN=ACLY PE=1 SV=3	ACLY	1	0.000677883	116.01	2	EILIPVFK(1)NMADAMK	-0.50779	1.11378	1.39725	2.09167	0.774168	0.293825	0.329308
Biological Process	GO:0006637	11	acyl-CoA metabolic process	1.77	0.00133702	F1S0N2	272	K	2.689	0.0397425	Up	ATP-citrate synthase OS=Sus scrofa OX=9823 GN=ACLY PE=1 SV=3	ACLY	1	0.00125457	134.81	2	LTLLNPK(1)GR	-0.21039	1.65104	0.884292	1.47144		0.413896	0.57933
Biological Process	GO:0006637	11	acyl-CoA metabolic process	1.77	0.00133702	F1S0N2	569	K	2.762	0.00634585	Up	ATP-citrate synthase OS=Sus scrofa OX=9823 GN=ACLY PE=1 SV=3	ACLY	1	0.0264778	47.574	3	QK(1)FYWGHK	-0.55299	1.63555	1.21061	1.18156		0.448414	0.52386
Biological Process	GO:0044782	7	cilium organization	1.52	0.00155348	F1SIK9	155	K	7.029	0.00510714	Up	Septin OS=Sus scrofa OX=9823 GN=SEPTIN7 PE=1 SV=3	SEPTIN7	1	3.02486e-07	218.49	2	ADTLTPEECQQFK(1)K	0.54717	1.25871	1.0879	2.90614	0.310824	0.192489	0.243937
Biological Process	GO:0044782	7	cilium organization	1.52	0.00155348	F1SIK9	245	K	4.026	0.00143966	Up	Septin OS=Sus scrofa OX=9823 GN=SEPTIN7 PE=1 SV=3	SEPTIN7	1	2.50359e-20	242.16	3	THMQDLK(1)DVTNNVHYENYR	0.054411	1.56067	1.20878	1.52017	0.384607	0.325777
Biological Process	GO:0044782	7	cilium organization	1.52	0.00155348	A0A286ZP34	236	K	24.804	0.00101474	Up	HYDIN axonemal central pair apparatus protein OS=Sus scrofa OX=9823 GN=HYDIN PE=4 SV=2	HYDIN	1	0.0172191	57.019	3	DAVFHIK(1)THR	-0.88736	1.55066	1.41433	2.8025	0.119386	0.0403538	0.0727785
Biological Process	GO:0044782	7	cilium organization	1.52	0.00155348	A0A286ZPL5	434	K	8.906	0.00524077	Up	WD_REPEATS_REGION domain-containing protein OS=Sus scrofa OX=9823 GN=DNAI1 PE=4 SV=2	DNAI1	1	2.60651e-09	237.68	2	SGK(1)HTDPVWQVR	0.10058	1.47437	1.09106	2.08634	0.213719	0.1345
Biological Process	GO:0044782	7	cilium organization	1.52	0.00155348	A0A286ZWH7	749	K	7.019	0.0151072	Up	A-kinase anchoring protein 4 OS=Sus scrofa OX=9823 GN=AKAP4 PE=3 SV=2	AKAP4	1	3.90465e-13	164.31	3	AALAELEEQAALANNANYQVSGPK(1)R	-0.54825	2.13901	1.36217			0.269417	0.229403
Biological Process	GO:0044782	7	cilium organization	1.52	0.00155348	A0A286ZWH7	606	K	21.925	0.0434356	Up	A-kinase anchoring protein 4 OS=Sus scrofa OX=9823 GN=AKAP4 PE=3 SV=2	AKAP4	1	9.65813e-105	389.16	3	ALSMK(1)HLESHGAPGPSTSLK	4.1908	1.12014	1.46786	3.15027	0.137801	0.00263279	0.121287
Biological Process	GO:0006637	11	acyl-CoA metabolic process	1.77	0.00133702	A0A5G2R718	240	K	6.879	0.0205121	Up	Pyruvate dehydrogenase E1 component subunit beta OS=Sus scrofa OX=9823 GN=PDHB PE=1 SV=1	PDHB	1	2.61644e-25	205.84	4	PVGHCLEAATVLSK(1)EGIECEVINMR	-0.21928	1.99621	1.82199	0.740027	0.215947		0.22583
Biological Process	GO:0044782	7	cilium organization	1.52	0.00155348	A0A5G2QGK1	297	K	5.298	0.00560968	Up	Tubulin beta chain OS=Sus scrofa OX=9823 GN=TUBB4B PE=1 SV=1	TUBB4B	1	1.3308e-38	276.63	3	ALTVPELTQQMFDAK(1)NMMAACDPR	3.4661	1.58078	1.13678	2.32981	0.436533	0.198463	0.317634
Biological Process	GO:0006637	11	acyl-CoA metabolic process	1.77	0.00133702	A0A287ANI6	48	K	6.106	0.00207926	Up	Hydroxymethylglutaryl-CoA lyase OS=Sus scrofa OX=9823 GN=HMGCL PE=1 SV=2	HMGCL	1	2.62413e-22	271.32	3	DGLQNEK(1)NIIPTPTK	-0.073686	2.60163	1.39746	1.15652	0.281633	0.293286	0.26947
Biological Process	GO:0006637	11	acyl-CoA metabolic process	1.77	0.00133702	A0A287BA45	254	K	2.573	0.0024603	Up	Succinate--CoA ligase [GDP-forming] subunit beta, mitochondrial OS=Sus scrofa OX=9823 GN=SUCLG2 PE=3 SV=1	SUCLG2	1	2.61085e-08	172.98	2	QK(1)DIFAMDDK	0.20076	1.14501	1.82339	1.35228	0.570803	0.554345	0.554172
Biological Process	GO:0035383	5	thioester metabolic process	1.77	0.00133702	F1S0N2	569	K	2.762	0.00634585	Up	ATP-citrate synthase OS=Sus scrofa OX=9823 GN=ACLY PE=1 SV=3	ACLY	1	0.0264778	47.574	3	QK(1)FYWGHK	-0.55299	1.63555	1.21061	1.18156		0.448414	0.52386
Biological Process	GO:0009063	8	cellular amino acid catabolic process	1.77	0.00133702	A0A287ADK3	409	K	17.969	0.0215392	Up	Aldehyde dehydrogenase (NAD(+)) OS=Sus scrofa OX=9823 GN=ALDH7A1 PE=1 SV=1	ALDH7A1	1	5.53261e-40	301.93	3	FK(1)NEDEVFAWNNEVK	-0.20014	1.56962	0.998956	2.25255	0.152374	0.0264957
Biological Process	GO:0009063	8	cellular amino acid catabolic process	1.77	0.00133702	A0A287ADK3	322	K	11.332	0.000279857	Up	Aldehyde dehydrogenase (NAD(+)) OS=Sus scrofa OX=9823 GN=ALDH7A1 PE=1 SV=1	ALDH7A1	1	0.00984518	102.95	2	LTK(1)AYAQIR	-0.33877	1.5294	2.12202	1.86203	0.224637	0.125655	0.136265
Biological Process	GO:0009063	8	cellular amino acid catabolic process	1.77	0.00133702	A0A287AFJ1	427	K	9.92	0.0027271	Up	Glutamine synthetase OS=Sus scrofa OX=9823 GN=GLUL PE=1 SV=1	GLUL	1	3.95046e-05	163.65	2	AYDPK(1)GGLDNAR	0.34881	2.00942	1.28014	2.161	0.307847	0.107117	0.13447
Biological Process	GO:0009063	8	cellular amino acid catabolic process	1.77	0.00133702	A0A287AFJ1	59	K	7.425	0.00135029	Up	Glutamine synthetase OS=Sus scrofa OX=9823 GN=GLUL PE=1 SV=1	GLUL	1	9.68841e-06	138.05	3	IK(1)SLTHQPSYSCSSR	-0.35705	1.69603	1.21179	2.37999	0.31582	0.190291	0.206072
Biological Process	GO:0009063	8	cellular amino acid catabolic process	1.77	0.00133702	A0A287AFJ1	395	K	9.373	0.00660517	Up	Glutamine synthetase OS=Sus scrofa OX=9823 GN=GLUL PE=1 SV=1	GLUL	1	1.58707e-18	214.69	3	PIPGNWNGAGCHTNFSTK(1)AMR	-0.068915	1.72254	1.41828	2.28075	0.38077	0.0965322	0.101135
Biological Process	GO:0009063	8	cellular amino acid catabolic process	1.77	0.00133702	A0A287ANI6	48	K	6.106	0.00207926	Up	Hydroxymethylglutaryl-CoA lyase OS=Sus scrofa OX=9823 GN=HMGCL PE=1 SV=2	HMGCL	1	2.62413e-22	271.32	3	DGLQNEK(1)NIIPTPTK	-0.073686	2.60163	1.39746	1.15652	0.281633	0.293286	0.26947
Biological Process	GO:0009063	8	cellular amino acid catabolic process	1.77	0.00133702	A0A287BPT0	195	K	2.4	0.0233365	Up	Amine oxidase OS=Sus scrofa OX=9823 GN=IL4I1 PE=1 SV=1	IL4I1	1	1.68098e-05	214.05	2	ALEDLK(1)TLGCR	0.51981	1.20217	1.15474	1.87817	0.831458	0.485994	0.447469
Biological Process	GO:0009063	8	cellular amino acid catabolic process	1.77	0.00133702	A0A287BPT0	354	K	10.856	0.00445141	Up	Amine oxidase OS=Sus scrofa OX=9823 GN=IL4I1 PE=1 SV=1	IL4I1	1	2.01115e-06	149.69	2	ALHYLPATK(1)VFLSFR	0.0098332	1.52372	1.25617	2.71404	0.183979	0.0760498	0.24604
Biological Process	GO:0035383	5	thioester metabolic process	1.77	0.00133702	F1S0N2	272	K	2.689	0.0397425	Up	ATP-citrate synthase OS=Sus scrofa OX=9823 GN=ACLY PE=1 SV=3	ACLY	1	0.00125457	134.81	2	LTLLNPK(1)GR	-0.21039	1.65104	0.884292	1.47144		0.413896	0.57933
Biological Process	GO:0009063	8	cellular amino acid catabolic process	1.77	0.00133702	A0A287BPT0	500	K	5.137	0.0203042	Up	Amine oxidase OS=Sus scrofa OX=9823 GN=IL4I1 PE=1 SV=1	IL4I1	1	2.50728e-38	263.71	3	IYFAGEHTAFPHGWVETAVK(1)SALR	0.26822	1.1991	1.04709	2.77616	0.513719	0.291314	0.172616
Biological Process	GO:0009063	8	cellular amino acid catabolic process	1.77	0.00133702	F1RPW8	271	K	13.256	0.0045557	Up	Asparaginase-like protein 1 OS=Sus scrofa OX=9823 GN=ASRGL1 PE=1 SV=3	ASRGL1	1	1.10699e-10	192.68	3	GVGGVIVVNK(1)AGDWAVK	0.26008	1.28883	1.0532	2.41855	0.128251	0.111168
Biological Process	GO:0009063	8	cellular amino acid catabolic process	1.77	0.00133702	F1RPW8	112	K	44.846	0.000417489	Up	Asparaginase-like protein 1 OS=Sus scrofa OX=9823 GN=ASRGL1 PE=1 SV=3	ASRGL1	1	4.09075e-68	338.23	3	LVMEK(1)THHCFLTDQGAAK	-0.13106	1.2552	2.06775	2.54617	0.0701378	0.0337045	0.0270294
Biological Process	GO:0009063	8	cellular amino acid catabolic process	1.77	0.00133702	F1RPW8	261	K	8.838	0.0094786	Up	Asparaginase-like protein 1 OS=Sus scrofa OX=9823 GN=ASRGL1 PE=1 SV=3	ASRGL1	1	0.00430827	108.26	2	VK(1)GVGGVIVVNK	-0.53896	1.19562	1.31602	2.13766	0.240696	0.110001
Biological Process	GO:0009063	8	cellular amino acid catabolic process	1.77	0.00133702	A0A5G2QIN8	319	K	4.487	0.0246806	Up	Aldehyde dehydrogenase 5 family member A1 OS=Sus scrofa OX=9823 GN=ALDH5A1 PE=1 SV=1	ALDH5A1	1	0.000868422	136.27	3	GIHDSFVK(1)K	-0.54088	2.18467	1.08874	1.63303	0.168477	0.68968	0.235411
Biological Process	GO:0009063	8	cellular amino acid catabolic process	1.77	0.00133702	A0A5G2QIN8	355	K	10.103	0.000216434	Up	Aldehyde dehydrogenase 5 family member A1 OS=Sus scrofa OX=9823 GN=ALDH5A1 PE=1 SV=1	ALDH5A1	1	0.000385609	124.6	2	VEK(1)HVIDAISK	-0.22712	1.99215	1.67125	1.79619	0.242916	0.164325	0.133176
Biological Process	GO:0009063	8	cellular amino acid catabolic process	1.77	0.00133702	F1SED0	425	K	11.718	0.000265981	Up	Acyl-CoA dehydrogenase short/branched chain OS=Sus scrofa OX=9823 GN=ACADSB PE=1 SV=4	ACADSB	1	1.34896e-123	409.14	3	IGTIYEGTSNIQLNTIAK(1)NVSK	3.0881	2.04105	1.63397	1.8532	0.110133	0.21613	0.145512
Biological Process	GO:0009063	8	cellular amino acid catabolic process	1.77	0.00133702	F1SK15	269	K	8.095	0.00138476	Up	Methylcrotonoyl-CoA carboxylase 2 OS=Sus scrofa OX=9823 GN=MCCC2 PE=1 SV=3	MCCC2	1	2.88828e-05	112.55	4	K(1)SGVSDYYALDDNHALHLVR	1.2163	1.19658	1.89434	1.52862	0.203764		0.176699
Biological Process	GO:0009063	8	cellular amino acid catabolic process	1.77	0.00133702	A0A287B9G2	328	K	12.504	0.00205742	Up	3-hydroxyisobutyryl-CoA hydrolase, mitochondrial OS=Sus scrofa OX=9823 GN=HIBCH PE=1 SV=2	HIBCH	1	0.00375626	107.57	2	AVLIDK(1)DQNPK	-0.47927	1.47583	2.13269	1.1384		0.139291	0.113795
Biological Process	GO:0009063	8	cellular amino acid catabolic process	1.77	0.00133702	A0A287BAZ8	321	K	16.9	0.000473841	Up	Lysine ketoglutarate reductase OS=Sus scrofa OX=9823 GN=AASS PE=1 SV=2	AASS	1	6.86637e-43	307.32	2	TDGVYDPIEYDK(1)HPER	0.59106	1.64167	1.35089	2.67225	0.152804	0.0847786	0.097612
Biological Process	GO:0009063	8	cellular amino acid catabolic process	1.77	0.00133702	A0A287BPT0	442	K	6.095	0.00897975	Up	Amine oxidase OS=Sus scrofa OX=9823 GN=IL4I1 PE=1 SV=1	IL4I1	1	0.000402054	190.51	2	LWDGSGVIK(1)R	-0.021554	1.68127	1.17312	2.29994	0.487875	0.205652	0.152136
Biological Process	GO:0035383	5	thioester metabolic process	1.77	0.00133702	F1S0N2	583	K	3.294	0.0244049	Up	ATP-citrate synthase OS=Sus scrofa OX=9823 GN=ACLY PE=1 SV=3	ACLY	1	0.000677883	116.01	2	EILIPVFK(1)NMADAMK	-0.50779	1.11378	1.39725	2.09167	0.774168	0.293825	0.329308
Biological Process	GO:0035383	5	thioester metabolic process	1.77	0.00133702	F1RUE0	17	K	62.725	3.63158e-06	Up	Acyl-CoA thioesterase 13 OS=Sus scrofa OX=9823 GN=ACOT13 PE=1 SV=2	ACOT13	1	0.000102791	171.36	2	LLGK(1)SSCFDR	-0.24855	1.84255	1.71739	2.3459	0.031943	0.0346195	0.0275915
Biological Process	GO:0035383	5	thioester metabolic process	1.77	0.00133702	F1RS43	434	K	10.198	0.000278666	Up	3-oxoacyl-[acyl-carrier-protein] synthase, mitochondrial OS=Sus scrofa OX=9823 GN=OXSM PE=3 SV=3	OXSM	1	0.0255005	92.653	2	AQEWK(1)TEK	-0.0062196	1.6265	1.57715	1.48955	0.1764		0.130397
Biological Process	GO:0035383	5	thioester metabolic process	1.77	0.00133702	A0A5G2QPK6	402	K	2.117	0.0256796	Up	Dihydrolipoyl dehydrogenase OS=Sus scrofa OX=9823 GN=DLD PE=1 SV=1	DLD	1	6.03025e-06	209.19	2	SEEQLK(1)EEGIEYK	0.28517	1.32037	1.83202	0.922558	0.625911	0.712405	0.586733
Biological Process	GO:0035383	5	thioester metabolic process	1.77	0.00133702	A0A5G2QSG9	137	K	31.739	0.00077276	Up	Dihydrolipoamide acetyltransferase component of pyruvate dehydrogenase complex OS=Sus scrofa OX=9823 GN=PDHX PE=1 SV=1	PDHX	1	2.03991e-20	220.6	2	LGSLIGLLVEEGEDWK(1)HVEIPK	0.30876	1.78794	2.60606	1.42273	0.0933109	0.0290634	0.0608926
Biological Process	GO:0035383	5	thioester metabolic process	1.77	0.00133702	A0A5G2QSG9	311	K	11.655	0.000159381	Up	Dihydrolipoamide acetyltransferase component of pyruvate dehydrogenase complex OS=Sus scrofa OX=9823 GN=PDHX PE=1 SV=1	PDHX	1	1.62774e-104	382.95	4	STIPHAYATADCDLGAVLK(1)VR	-1.6514	1.89385	1.45841	2.17363	0.200507	0.146317	0.127292
Biological Process	GO:0035383	5	thioester metabolic process	1.77	0.00133702	A0A5G2QSG9	191	K	20.177	0.000113065	Up	Dihydrolipoamide acetyltransferase component of pyruvate dehydrogenase complex OS=Sus scrofa OX=9823 GN=PDHX PE=1 SV=1	PDHX	1	4.28436e-139	427.61	3	NILEK(1)HALDANQGTATGPR	0.1433	1.54938	2.28695	1.88034	0.124763	0.0705528	0.0880149
Biological Process	GO:0035383	5	thioester metabolic process	1.77	0.00133702	A0A5G2QSG9	170	K	7.66	0.00876038	Up	Dihydrolipoamide acetyltransferase component of pyruvate dehydrogenase complex OS=Sus scrofa OX=9823 GN=PDHX PE=1 SV=1	PDHX	1	0.00244504	75.533	3	PSVPPPPSPQPQISTPVK(1)K	0.24889		2.09625	1.44186	0.238889		0.223003
Biological Process	GO:0035383	5	thioester metabolic process	1.77	0.00133702	A0A5G2R718	34	K	6.023	0.0316931	Up	Pyruvate dehydrogenase E1 component subunit beta OS=Sus scrofa OX=9823 GN=PDHB PE=1 SV=1	PDHB	1	1.04594e-20	167.61	4	DAINQGMDEELERDEK(1)VFLLGEEVAQYDGAYK	-0.31808	1.03207	2.48971	0.97998	0.326682		0.171565
Biological Process	GO:0035383	5	thioester metabolic process	1.77	0.00133702	A0A5G2R718	50	K	6.433	0.000338382	Up	Pyruvate dehydrogenase E1 component subunit beta OS=Sus scrofa OX=9823 GN=PDHB PE=1 SV=1	PDHB	1	2.1295e-55	321.67	3	VFLLGEEVAQYDGAYK(1)VSR	-0.11923	1.30726	1.5305	1.69276	0.241922	0.227567
Biological Process	GO:0035383	5	thioester metabolic process	1.77	0.00133702	A0A5G2R718	336	K	25.703	0.000583753	Up	Pyruvate dehydrogenase E1 component subunit beta OS=Sus scrofa OX=9823 GN=PDHB PE=1 SV=1	PDHB	1	0.0255332	92.307	3	ILEDNSVPQVK(1)DIIFAIK(1)K	0.31701	1.47854	1.75327	2.5435	0.122807	0.0521125	0.0497732
Biological Process	GO:0035383	5	thioester metabolic process	1.77	0.00133702	A0A5G2R718	170	K	11.034	0.000616898	Up	Pyruvate dehydrogenase E1 component subunit beta OS=Sus scrofa OX=9823 GN=PDHB PE=1 SV=1	PDHB	1	0.00690861	120.65	2	GLIK(1)SAIR	-0.50635	1.84458	1.33623	2.32059	0.233349	0.133349	0.131903
Biological Process	GO:0035383	5	thioester metabolic process	1.77	0.00133702	A0A5G2R718	240	K	6.879	0.0205121	Up	Pyruvate dehydrogenase E1 component subunit beta OS=Sus scrofa OX=9823 GN=PDHB PE=1 SV=1	PDHB	1	2.61644e-25	205.84	4	PVGHCLEAATVLSK(1)EGIECEVINMR	-0.21928	1.99621	1.82199	0.740027	0.215947		0.22583
Biological Process	GO:0035383	5	thioester metabolic process	1.77	0.00133702	A0A5G2R718	166	K	14.707	0.00444135	Up	Pyruvate dehydrogenase E1 component subunit beta OS=Sus scrofa OX=9823 GN=PDHB PE=1 SV=1	PDHB	1	8.42777e-07	162.68	3	VVSPWSSEDAK(1)GLIK	-0.13568	1.72959		2.80764	0.214388	0.151972	0.0964119
Biological Process	GO:0035383	5	thioester metabolic process	1.77	0.00133702	F1RPU8	19	K	17.711	0.000499448	Up	Mitochondrial pyruvate carrier OS=Sus scrofa OX=9823 GN=MPC2 PE=1 SV=4	MPC2	1	0.000269522	140.24	2	VLDK(1)VELLLPEK	-0.36674	1.5011	1.40448	2.77375	0.136634	0.108465	0.0755768
Biological Process	GO:0035383	5	thioester metabolic process	1.77	0.00133702	I3LCI2	244	K	14.326	7.06486e-05	Up	Pyruvate dehydrogenase E1 component subunit alpha OS=Sus scrofa OX=9823 GN=PDHA1 PE=1 SV=2	PDHA1	1	0.000402517	172.21	2	AAASTDYYK(1)R	0.24715	2.1465	1.89941	1.56258	0.162102	0.104595	0.124807
Biological Process	GO:0035383	5	thioester metabolic process	1.77	0.00133702	I3LCI2	83	K	2.468	0.0111998	Up	Pyruvate dehydrogenase E1 component subunit alpha OS=Sus scrofa OX=9823 GN=PDHA1 PE=1 SV=2	PDHA1	1	2.11455e-13	245.15	3	RMELK(1)ADQLYK(1)QK	-0.75819	1.26937	1.80276	1.19758	0.410631	0.633634	0.686031
Biological Process	GO:0035383	5	thioester metabolic process	1.77	0.00133702	I3LCI2	85	K	9.005	0.000162366	Up	Pyruvate dehydrogenase E1 component subunit alpha OS=Sus scrofa OX=9823 GN=PDHA1 PE=1 SV=2	PDHA1	1	0.000436708	138.22	2	ADQLYK(1)QK(1)IIR	-0.94509	1.44813	1.61689	2.33528	0.182028	0.226178	0.19149
Biological Process	GO:0035383	5	thioester metabolic process	1.77	0.00133702	I3LCI2	149	K	30.357	0.00264492	Up	Pyruvate dehydrogenase E1 component subunit alpha OS=Sus scrofa OX=9823 GN=PDHA1 PE=1 SV=2	PDHA1	1	0.000497327	166.66	2	GK(1)GGSMHMYAK	-0.26957	1.20887	1.1745	2.50919		0.0416124	0.0658308
Biological Process	GO:0035383	5	thioester metabolic process	1.77	0.00133702	I3LCI2	77	K	7.793	0.000756203	Up	Pyruvate dehydrogenase E1 component subunit alpha OS=Sus scrofa OX=9823 GN=PDHA1 PE=1 SV=2	PDHA1	1	2.11455e-13	245.15	3	RMELK(1)ADQLYK(1)QK	-0.75819	1.64932	1.96265	1.70571	0.290556	0.25052	0.141251
Biological Process	GO:0035383	5	thioester metabolic process	1.77	0.00133702	I3LCI2	321	K	7.822	0.000142572	Up	Pyruvate dehydrogenase E1 component subunit alpha OS=Sus scrofa OX=9823 GN=PDHA1 PE=1 SV=2	PDHA1	1	7.16903e-05	200.93	2	SK(1)SDPIMLLK(1)DR	-0.73938	1.52532	2.28207	1.51246	0.220389	0.247774	0.211984
Biological Process	GO:0035383	5	thioester metabolic process	1.77	0.00133702	I3LCI2	277	K	5.209	0.00236988	Up	Pyruvate dehydrogenase E1 component subunit alpha OS=Sus scrofa OX=9823 GN=PDHA1 PE=1 SV=2	PDHA1	1	2.82417e-14	251.03	2	SGK(1)GPILMELQTYR	2.0211	1.31828	1.80506	1.30939		0.244799	0.322474
Biological Process	GO:0035383	5	thioester metabolic process	1.77	0.00133702	I3LCI2	313	K	13.059	0.000364323	Up	Pyruvate dehydrogenase E1 component subunit alpha OS=Sus scrofa OX=9823 GN=PDHA1 PE=1 SV=2	PDHA1	1	4.7682e-05	200.93	2	SK(1)SDPIMLLK(1)DR	-0.73938	1.98833	2.05998	1.5249	0.20686	0.115592	0.104335
Biological Process	GO:0035383	5	thioester metabolic process	1.77	0.00133702	D2D0E6	151	K	8.729	0.00142869	Up	Malonyl-CoA decarboxylase OS=Sus scrofa OX=9823 GN=MLYCD PE=4 SV=1	MLYCD	1	0.0136598	61.657	3	SLFHHISK(1)LDGGVR	-2.578	1.93742	1.65143			0.209281	0.201865
Biological Process	GO:0009063	8	cellular amino acid catabolic process	1.77	0.00133702	A0A287BAZ8	23	K	6.542	1.21191e-05	Up	Lysine ketoglutarate reductase OS=Sus scrofa OX=9823 GN=AASS PE=1 SV=2	AASS	1	0.000821172	112.75	2	LHHK(1)AVMALR	-0.24322	1.82443	1.67046	1.70957	0.269504	0.292608	0.233424
Biological Process	GO:0006637	11	acyl-CoA metabolic process	1.77	0.00133702	A0A287AJ16	45	K	3.441	0.0430235	Up	Acyl-CoA synthetase bubblegum family member 2 OS=Sus scrofa OX=9823 GN=ACSBG2 PE=1 SV=2	ACSBG2	1	7.593e-12	190.25	3	LSK(1)HGPGHETPMTIPEFFR	-0.018293	1.60297	0.666282	2.37979	0.499939	0.429165	0.421856
Biological Process	GO:0009063	8	cellular amino acid catabolic process	1.77	0.00133702	P00506	90	K	27.053	0.000878985	Up	Aspartate aminotransferase, mitochondrial OS=Sus scrofa OX=9823 GN=GOT2 PE=1 SV=2	GOT2	1	1.28758e-38	315.59	2	K(1)AEAQIAAK(1)NLDK	-0.28283	1.73603	1.80514	2.24496	0.126186	0.0526204	0.0350725
Biological Process	GO:0009063	8	cellular amino acid catabolic process	1.77	0.00133702	P00506	73	K	4.807	0.0021095	Up	Aspartate aminotransferase, mitochondrial OS=Sus scrofa OX=9823 GN=GOT2 PE=1 SV=2	GOT2	1	0.00311676	112.13	2	DDNGK(1)PYVLPSVR	-0.24733	1.52005	1.67046	1.77625	0.371542	0.21292	0.448776
Biological Process	GO:0009063	8	cellular amino acid catabolic process	1.77	0.00133702	A0A5G2R3R8	164	K	22.539	0.000332193	Up	Glutamate dehydrogenase OS=Sus scrofa OX=9823 GN=GLUD1 PE=1 SV=1	GLUD1	1	0.00228414	117.25	3	INPK(1)NYTDNELEK	0.47896	2.0084	1.88074	1.85596	0.12902	0.0493664	0.0765088
Biological Process	GO:0009063	8	cellular amino acid catabolic process	1.77	0.00133702	A0A5G2R3R8	363	K	35.564	0.00069334	Up	Glutamate dehydrogenase OS=Sus scrofa OX=9823 GN=GLUD1 PE=1 SV=1	GLUD1	1	0.000414811	150.17	2	QLTK(1)SNAPR	0.073608	1.27163	1.5177	2.11867		0.0550769	0.0369257
Biological Process	GO:0009063	8	cellular amino acid catabolic process	1.77	0.00133702	A0A5G2RA17	28	K	4.318	0.0102673	Up	Aldehyde dehydrogenase 6 family member A1 OS=Sus scrofa OX=9823 GN=ALDH6A1 PE=1 SV=1	ALDH6A1	1	0.0118219	86.18	2	LFIGGK(1)FIESK	-1.3209	1.76493	1.61096	0.955402	0.33137	0.337342
Biological Process	GO:0009063	8	cellular amino acid catabolic process	1.77	0.00133702	A0A5G2RA17	57	K	21.395	0.000334485	Up	Aldehyde dehydrogenase 6 family member A1 OS=Sus scrofa OX=9823 GN=ALDH6A1 PE=1 SV=1	ALDH6A1	1	5.32736e-44	313.31	3	VPQATK(1)AEMDAAVSSCK	-0.45464	2.19362	1.567	1.97148	0.137999	0.0690887	0.060825
Biological Process	GO:0009063	8	cellular amino acid catabolic process	1.77	0.00133702	A0A5K1UWY1	191	K	12.638	0.000435349	Up	Maleylacetoacetate isomerase OS=Sus scrofa OX=9823 GN=GSTZ1 PE=1 SV=1	GSTZ1	1	4.24742e-44	312.42	2	INK(1)SLLALEAFQVSHPSR	-0.41789	1.56057	1.70605	2.29344	0.208517	0.101893	0.129526
Biological Process	GO:0009063	8	cellular amino acid catabolic process	1.77	0.00133702	A0A5K1UWY1	177	K	23.734	0.000153212	Up	Maleylacetoacetate isomerase OS=Sus scrofa OX=9823 GN=GSTZ1 PE=1 SV=1	GSTZ1	1	1.43668e-05	187.31	2	YK(1)VDLSPYPTISR	-0.21251	2.14127	1.49688	2.11927	0.106443	0.0818943	0.0542464
Biological Process	GO:0009063	8	cellular amino acid catabolic process	1.77	0.00133702	F1RFB8	55	K	7.946	0.0125141	Up	2-aminoethanethiol (Cysteamine) dioxygenase OS=Sus scrofa OX=9823 GN=ADO PE=1 SV=1	ADO	1	0.0166056	89.542	2	LK(1)SLLTQVR	-0.67128	1.75645	1.73134	1.84155	0.478307	0.0764162	0.115943
Biological Process	GO:0009063	8	cellular amino acid catabolic process	1.77	0.00133702	F1SA26	66	K	8.108	0.000895461	Up	Arginase OS=Sus scrofa OX=9823 GN=ARG2 PE=3 SV=1	ARG2	1	2.47601e-08	157.73	3	LSDLGCHLK(1)DFGDLSFTPVPK	0.13971	1.46262	1.89479	1.26271		0.195978	0.183907
Biological Process	GO:0009063	8	cellular amino acid catabolic process	1.77	0.00133702	I3LNB4	192	K	9.69	0.00855633	Up	Multifunctional fusion protein OS=Sus scrofa OX=9823 GN=ALDH4A1 PE=1 SV=3	ALDH4A1	1	3.92338e-05	180.61	2	RAEILAK(1)TMVGQGK	-0.60394	1.3299	1.42318	2.68566	0.354019	0.131491	0.0757495
Biological Process	GO:0009063	8	cellular amino acid catabolic process	1.77	0.00133702	A0A5G2QZN1	70	K	19.557	0.000111763	Up	Dihydropteridine reductase OS=Sus scrofa OX=9823 GN=QDPR PE=4 SV=1	QDPR	1	0.00012482	152.67	2	SLFK(1)NCDLMWK	0.39208	1.82805	1.61768	2.26239	0.133095	0.0792643	0.0795146
Biological Process	GO:0009063	8	cellular amino acid catabolic process	1.77	0.00133702	I3LNB4	145	K	9.736	0.00128285	Up	Multifunctional fusion protein OS=Sus scrofa OX=9823 GN=ALDH4A1 PE=1 SV=3	ALDH4A1	1	9.39689e-05	200.11	3	VAK(1)FCYADK(1)ALLHR	-0.53984	1.29682	1.8763	2.26801	0.276073	0.125663	0.157128
Biological Process	GO:0009063	8	cellular amino acid catabolic process	1.77	0.00133702	I3LNB4	422	K	8.681	0.0110099	Up	Multifunctional fusion protein OS=Sus scrofa OX=9823 GN=ALDH4A1 PE=1 SV=3	ALDH4A1	1	1.71804e-07	155.22	2	IK(1)VGDPAEDFGTFFSAVIDAK	0.53449	1.24266	1.19122	2.20952	0.244668	0.111927
Biological Process	GO:0009063	8	cellular amino acid catabolic process	1.77	0.00133702	I3LNB4	448	K	11.509	0.000187342	Up	Multifunctional fusion protein OS=Sus scrofa OX=9823 GN=ALDH4A1 PE=1 SV=3	ALDH4A1	1	0.0095833	149.4	2	K(1)WLEHAR	-0.22059	1.61145	1.77872	2.13016	0.204722	0.115026	0.159919
Biological Process	GO:0009063	8	cellular amino acid catabolic process	1.77	0.00133702	I3LNB4	364	K	20.487	0.00352003	Up	Multifunctional fusion protein OS=Sus scrofa OX=9823 GN=ALDH4A1 PE=1 SV=3	ALDH4A1	1	5.2846e-07	144.27	4	LAGECGGK(1)NFHFVHR	0.31744	1.31589	1.04741	2.47913		0.0908397	0.0667358
Biological Process	GO:0009063	8	cellular amino acid catabolic process	1.77	0.00133702	I3LNB4	411	K	11.318	0.0277806	Up	Multifunctional fusion protein OS=Sus scrofa OX=9823 GN=ALDH4A1 PE=1 SV=3	ALDH4A1	1	2.97561e-05	152.04	2	LYVPGSLWPQIK(1)GR	-0.060728		1.74335	1.93192	0.227452		0.0972815
Biological Process	GO:0009063	8	cellular amino acid catabolic process	1.77	0.00133702	I3LNB4	139	K	15.295	0.000459346	Up	Multifunctional fusion protein OS=Sus scrofa OX=9823 GN=ALDH4A1 PE=1 SV=3	ALDH4A1	1	0.00170069	136.17	4	YQVSPFNHGHK(1)VAK(1)FCYADK	0.64028	1.31413	1.64291	1.83413	0.0902648		0.118564
Biological Process	GO:0009063	8	cellular amino acid catabolic process	1.77	0.00133702	I3LNB4	136	K	10.105	0.00733966	Up	Multifunctional fusion protein OS=Sus scrofa OX=9823 GN=ALDH4A1 PE=1 SV=3	ALDH4A1	1	0.000213983	119.39	4	YQVSPFNHGHK(1)VAK(1)FCYADK	0.64028	1.69171	1.72391	2.04406	0.0591214	0.143857	0.337339
Biological Process	GO:0006637	11	acyl-CoA metabolic process	1.77	0.00133702	A0A286ZVQ0	42	K	3.93	0.000258842	Up	Acyl-coenzyme A thioesterase 2, mitochondrial(predicted) OS=Sus scrofa OX=9823 GN=ACOT4 PE=1 SV=2	ACOT4	1	0.0040599	132.29	2	DEK(1)GALFR	0.73605	1.49139	1.92941	1.36218	0.416795	0.425315	0.374918
Biological Process	GO:0006637	11	acyl-CoA metabolic process	1.77	0.00133702	A0A286ZVQ0	348	K	9.941	0.000305548	Up	Acyl-coenzyme A thioesterase 2, mitochondrial(predicted) OS=Sus scrofa OX=9823 GN=ACOT4 PE=1 SV=2	ACOT4	1	0.00776261	100.02	2	EK(1)PQIICYPR	-1.2976	1.40495	1.8454	2.20123	0.239424	0.159295	0.149697
Biological Process	GO:0006637	11	acyl-CoA metabolic process	1.77	0.00133702	A0A287BA45	76	K	5.313	5.65192e-05	Up	Succinate--CoA ligase [GDP-forming] subunit beta, mitochondrial OS=Sus scrofa OX=9823 GN=SUCLG2 PE=3 SV=1	SUCLG2	1	0.00626994	103.7	2	GK(1)GVFSSGLK	-2.2376	1.6977	1.6271	1.72476	0.36339	0.32192	0.265131
Biological Process	GO:0009063	8	cellular amino acid catabolic process	1.77	0.00133702	I3LNB4	342	K	4.411	2.63564e-05	Up	Multifunctional fusion protein OS=Sus scrofa OX=9823 GN=ALDH4A1 PE=1 SV=3	ALDH4A1	1	2.85446e-05	138.77	3	HLWK(1)QVAQNLDHFR	1.0309	1.40632	1.46411	1.47304	0.315807	0.340721
Biological Process	GO:0009063	8	cellular amino acid catabolic process	1.77	0.00133702	A0A5G2QZN1	92	K	9.334	0.00175806	Up	Dihydropteridine reductase OS=Sus scrofa OX=9823 GN=QDPR PE=4 SV=1	QDPR	1	6.66337e-08	154.12	4	QSMWTSTISSHLATK(1)HLK	0.28013	1.29719	1.38424	2.73796	0.258637	0.140787	0.181186
Biological Process	GO:0009063	8	cellular amino acid catabolic process	1.77	0.00133702	A0A5G2QSR2	99	K	17.16	2.60789e-06	Up	Hydroxysteroid 17-beta dehydrogenase 10 OS=Sus scrofa OX=9823 GN=HSD17B10 PE=1 SV=1	HSD17B10	1	3.87487e-61	335.1	3	VDVAVNCAGIGVASK(1)TYNLK	2.7396	1.83568	2.10653	1.7274	0.117796	0.111137	0.101458
Biological Process	GO:0009063	8	cellular amino acid catabolic process	1.77	0.00133702	A0A5G2QSR2	9	K	5.724	0.0479807	Up	Hydroxysteroid 17-beta dehydrogenase 10 OS=Sus scrofa OX=9823 GN=HSD17B10 PE=1 SV=1	HSD17B10	1	3.52068e-07	127.28	3	SVK(1)GLVAIITGGASGLGLATAER	-0.36315	1.72462	2.12685	0.626924		0.30895	0.21266
Biological Process	GO:0009063	8	cellular amino acid catabolic process	1.77	0.00133702	P00506	159	K	27.652	0.00017082	Up	Aspartate aminotransferase, mitochondrial OS=Sus scrofa OX=9823 GN=GOT2 PE=1 SV=2	GOT2	1	2.28188e-25	259.7	2	DVFLPK(1)PSWGNHTPIFR	-0.14649	2.4752	1.57385	1.74154	0.08588	0.0787644	0.0447638
Biological Process	GO:0009063	8	cellular amino acid catabolic process	1.77	0.00133702	P00506	404	K	13.671	0.00011086	Up	Aspartate aminotransferase, mitochondrial OS=Sus scrofa OX=9823 GN=GOT2 PE=1 SV=2	GOT2	1	3.9735e-05	205.09	2	EFSIYMTK(1)DGR	-0.40074	1.99297	1.75064	1.84742	0.185849	0.11365	0.10947
Biological Process	GO:0009063	8	cellular amino acid catabolic process	1.77	0.00133702	P00506	234	K	11.05	0.000617036	Up	Aspartate aminotransferase, mitochondrial OS=Sus scrofa OX=9823 GN=GOT2 PE=1 SV=2	GOT2	1	1.70945e-06	93.437	5	IPAQSVILLHACAHNPTGVDPRPEQWK(1)EMATLVK(1)K	-0.28561	1.64881	2.15028	1.70299	0.247217	0.139063	0.111637
Biological Process	GO:0009063	8	cellular amino acid catabolic process	1.77	0.00133702	P00506	279	K	32.497	0.000531278	Up	Aspartate aminotransferase, mitochondrial OS=Sus scrofa OX=9823 GN=GOT2 PE=1 SV=2	GOT2	1	3.08668e-46	282.05	3	HFIEQGINVCLCQSYAK(1)NMGLYGER	-0.21123	1.75921	1.28562	1.85466		0.0609308	0.0395821
Biological Process	GO:0009063	8	cellular amino acid catabolic process	1.77	0.00133702	P00506	345	K	8.513	0.00572542	Up	Aspartate aminotransferase, mitochondrial OS=Sus scrofa OX=9823 GN=GOT2 PE=1 SV=2	GOT2	1	8.52894e-05	179.19	3	QQWLQEVK(1)GMADR	-0.49791	1.41017	1.98195	1.24477	0.239821		0.123294
Biological Process	GO:0009063	8	cellular amino acid catabolic process	1.77	0.00133702	P00506	309	K	10.969	0.000213193	Up	Aspartate aminotransferase, mitochondrial OS=Sus scrofa OX=9823 GN=GOT2 PE=1 SV=2	GOT2	1	1.53243e-05	207.29	2	VESQLK(1)ILIR	0.4788	1.91308	1.91324	1.67237	0.228165	0.121864	0.151283
Biological Process	GO:0009063	8	cellular amino acid catabolic process	1.77	0.00133702	P00506	296	K	13.166	0.000619756	Up	Aspartate aminotransferase, mitochondrial OS=Sus scrofa OX=9823 GN=GOT2 PE=1 SV=2	GOT2	1	4.3194e-07	196.67	3	VGAFTVVCK(1)DAEEAK(1)R	0.22048	1.47011	1.86087	2.24548	0.212591	0.0968385	0.114108
Biological Process	GO:0009063	8	cellular amino acid catabolic process	1.77	0.00133702	P00506	185	K	7.392	0.000898733	Up	Aspartate aminotransferase, mitochondrial OS=Sus scrofa OX=9823 GN=GOT2 PE=1 SV=2	GOT2	1	1.17093e-17	213.49	2	YYDPK(1)TCGFDFTGALEDISK	1.4659	1.89835	1.72845	1.65824	0.351514	0.164186	0.199257
Biological Process	GO:0009063	8	cellular amino acid catabolic process	1.77	0.00133702	A0A5G2QGS5	189	K	7.57	0.00461557	Up	Acetyl-CoA acetyltransferase 1 OS=Sus scrofa OX=9823 GN=ACAT1 PE=1 SV=1	ACAT1	1	1.45144e-17	199.61	3	DGLTDVYNK(1)IHMGNCAENTAK	-0.045735	2.1555	2.01764		0.377836	0.183822	0.265202
Biological Process	GO:0009063	8	cellular amino acid catabolic process	1.77	0.00133702	A0A5G2QGS5	244	K	12.716	0.000615442	Up	Acetyl-CoA acetyltransferase 1 OS=Sus scrofa OX=9823 GN=ACAT1 PE=1 SV=1	ACAT1	1	9.35826e-08	212.59	2	GK(1)PDTVVKEDEEYKR	-0.14921	1.5701	1.94238	2.05008	0.221611	0.121732	0.0940989
Biological Process	GO:0009063	8	cellular amino acid catabolic process	1.77	0.00133702	A0A5G2QGS5	250	K	11.974	0.0032655	Up	Acetyl-CoA acetyltransferase 1 OS=Sus scrofa OX=9823 GN=ACAT1 PE=1 SV=1	ACAT1	1	8.23212e-40	308.74	2	GKPDTVVK(1)EDEEYKR	0.19203	1.50355	1.55256	1.68019	0.181169		0.0825359
Biological Process	GO:0009063	8	cellular amino acid catabolic process	1.77	0.00133702	A0A5G2QGS5	267	K	12.183	0.0100254	Up	Acetyl-CoA acetyltransferase 1 OS=Sus scrofa OX=9823 GN=ACAT1 PE=1 SV=1	ACAT1	1	0.00533267	173.11	2	LK(1)TVFQK	0.48107	1.52684	1.38348	1.83026	0.198907		0.0605114
Biological Process	GO:0009063	8	cellular amino acid catabolic process	1.77	0.00133702	A0A5G2QGS5	123	K	2.893	0.00648098	Up	Acetyl-CoA acetyltransferase 1 OS=Sus scrofa OX=9823 GN=ACAT1 PE=1 SV=1	ACAT1	1	4.41462e-10	151.42	3	QAVLGAGLPISTPCTTINK(1)VCASGMK	1.4209	1.05519	1.54805	1.46041	0.464522		0.471823
Biological Process	GO:0009063	8	cellular amino acid catabolic process	1.77	0.00133702	A0A5G2QGS5	222	K	11.922	0.00257753	Up	Acetyl-CoA acetyltransferase 1 OS=Sus scrofa OX=9823 GN=ACAT1 PE=1 SV=1	ACAT1	1	0.0158276	91.085	2	SK(1)AAWEAGK	-0.74953	2.24838	2.19285		0.26981	0.14756	0.141401
Biological Process	GO:0009063	8	cellular amino acid catabolic process	1.77	0.00133702	A0A5G2QGS5	262	K	25.223	0.000792457	Up	Acetyl-CoA acetyltransferase 1 OS=Sus scrofa OX=9823 GN=ACAT1 PE=1 SV=1	ACAT1	1	0.00402759	132.57	2	VDFNK(1)VPK	0.10583	1.23796	1.78037	1.85292		0.0781217	0.050632
Biological Process	GO:0009063	8	cellular amino acid catabolic process	1.77	0.00133702	A0A5G2QR28	279	K	11.558	0.000246128	Up	3-hydroxyisobutyrate dehydrogenase, mitochondrial OS=Sus scrofa OX=9823 GN=HIBADH PE=1 SV=1	HIBADH	1	0.000898884	129.38	2	LGLDPK(1)LLAK	0.37367	1.78974	1.40637	2.3261	0.168027	0.18899	0.120772
Biological Process	GO:0009063	8	cellular amino acid catabolic process	1.77	0.00133702	A0A5G2QR28	60	K	8.828	0.00904792	Up	3-hydroxyisobutyrate dehydrogenase, mitochondrial OS=Sus scrofa OX=9823 GN=HIBADH PE=1 SV=1	HIBADH	1	1.68276e-48	307.9	3	NLMK(1)HGYPLIIYDVFPDACK	-0.26054	1.43013	1.79848	2.16089	0.375654	0.0688928	0.165951
Biological Process	GO:0009063	8	cellular amino acid catabolic process	1.77	0.00133702	A0A5G2QR28	362	K	4.925	0.0229761	Up	3-hydroxyisobutyrate dehydrogenase, mitochondrial OS=Sus scrofa OX=9823 GN=HIBADH PE=1 SV=1	HIBADH	1	2.74263e-16	256.19	2	GYANK(1)DFSSVFQFLR	-0.058564	1.58087	1.24695	1.57601	0.439642		0.156536
Biological Process	GO:0009063	8	cellular amino acid catabolic process	1.77	0.00133702	A0A5G2QR28	357	K	10.199	0.00221868	Up	3-hydroxyisobutyrate dehydrogenase, mitochondrial OS=Sus scrofa OX=9823 GN=HIBADH PE=1 SV=1	HIBADH	1	0.000505001	136.16	2	LMCAK(1)GYANK	0.44018	1.19374	1.34171	2.92879	0.239169	0.142343	0.154251
Biological Process	GO:0009063	8	cellular amino acid catabolic process	1.77	0.00133702	A0A5G2QSR2	56	K	5.021	0.00111427	Up	Hydroxysteroid 17-beta dehydrogenase 10 OS=Sus scrofa OX=9823 GN=HSD17B10 PE=1 SV=1	HSD17B10	1	5.29832e-99	380.13	2	LGK(1)SCAFAPADVTSEK	0.3684	1.39787	1.4795	2.1261	0.262432	0.309106	0.424988
Biological Process	GO:0009063	8	cellular amino acid catabolic process	1.77	0.00133702	A0A5G2QSR2	52	K	6.364	0.000173841	Up	Hydroxysteroid 17-beta dehydrogenase 10 OS=Sus scrofa OX=9823 GN=HSD17B10 PE=1 SV=1	HSD17B10	1	4.0797e-28	228.6	3	LVGQGASAVLLDLPHSDGEAQAK(1)K	-0.44388	1.74864	1.47964	1.95696	0.333912	0.247394	0.23345
Biological Process	GO:0009063	8	cellular amino acid catabolic process	1.77	0.00133702	P00506	122	K	4.877	0.0126835	Up	Aspartate aminotransferase, mitochondrial OS=Sus scrofa OX=9823 GN=GOT2 PE=1 SV=2	GOT2	1	4.4751e-100	385.31	2	ASAELALGENNEVLK(1)SGR	-0.26663	1.24871	1.6234	2.1069	0.602666	0.178371	0.239957
Biological Process	GO:0090407	6	organophosphate biosynthetic process	1.41	0.00198558	F1SUF2	419	K	8.978	0.00115314	Up	Hexokinase OS=Sus scrofa OX=9823 GN=HK1 PE=1 SV=4	HK1	1	1.86313e-138	424.41	2	TTVGVDGSLYK(1)THPQYSR	0.076834	1.70899	1.49602	2.19367	0.306949	0.153352	0.141025
Biological Process	GO:0044782	7	cilium organization	1.52	0.00155348	A0A5G2QGK1	336	K	5.477	0.0214025	Up	Tubulin beta chain OS=Sus scrofa OX=9823 GN=TUBB4B PE=1 SV=1	TUBB4B	1	1.4668e-25	202.17	3	EVDEQMLNVQNK(1)NSSYFVEWIPNNVK	0.2218	1.7465	0.920376	2.40672	0.578085	0.167538	0.180776
Biological Process	GO:0044782	7	cilium organization	1.52	0.00155348	A0A5G2QGK1	58	K	6.046	0.00924907	Up	Tubulin beta chain OS=Sus scrofa OX=9823 GN=TUBB4B PE=1 SV=1	TUBB4B	1	7.08926e-52	319.37	2	INVYYNEATGGK(1)YVPR	0.44775	1.49518	1.33768	2.31564	0.514004	0.16492	0.172565
Biological Process	GO:0090407	6	organophosphate biosynthetic process	1.41	0.00198558	F1RPS8	489	K	4.906	0.00358561	Up	ATP synthase subunit alpha OS=Sus scrofa OX=9823 GN=ATP5F1A PE=1 SV=3	ATP5F1A	1	0.0159255	106.11	2	LEPSK(1)ITK	-0.29687	1.34368	1.9286	1.71175	0.499739	0.301569	0.214658
Biological Process	GO:0090407	6	organophosphate biosynthetic process	1.41	0.00198558	F1RPS8	492	K	6.016	0.000202898	Up	ATP synthase subunit alpha OS=Sus scrofa OX=9823 GN=ATP5F1A PE=1 SV=3	ATP5F1A	1	9.77516e-19	211.96	4	ITK(1)FENAFLSHVISQHQALLGK(1)IR	-0.80662	1.4855	1.9846	1.67475	0.344308	0.235519	0.275315
Biological Process	GO:0090407	6	organophosphate biosynthetic process	1.41	0.00198558	F1RPS8	204	K	13.971	0.00822167	Up	ATP synthase subunit alpha OS=Sus scrofa OX=9823 GN=ATP5F1A PE=1 SV=3	ATP5F1A	1	2.63052e-08	207.27	2	QTGK(1)TSIAIDTIINQK	-0.20179	1.65896	0.938535	3.00173	0.259749	0.0579558	0.0830745
Biological Process	GO:0090407	6	organophosphate biosynthetic process	1.41	0.00198558	F1RPS8	216	K	10.857	0.000844146	Up	ATP synthase subunit alpha OS=Sus scrofa OX=9823 GN=ATP5F1A PE=1 SV=3	ATP5F1A	1	3.16164e-20	267.45	2	TSIAIDTIINQK(1)R	0.36045	1.42636	1.75603	2.31158	0.248026	0.143629	0.114375
Biological Process	GO:0090407	6	organophosphate biosynthetic process	1.41	0.00198558	F1RPS8	247	K	11.878	0.00410941	Up	ATP synthase subunit alpha OS=Sus scrofa OX=9823 GN=ATP5F1A PE=1 SV=3	ATP5F1A	1	4.16252e-05	198.73	2	STVAQLVK(1)R	0.1271		1.95336	2.48603	0.278668	0.154268	0.127669
Biological Process	GO:0090407	6	organophosphate biosynthetic process	1.41	0.00198558	F1RPS8	147	K	13.599	0.000386044	Up	ATP synthase subunit alpha OS=Sus scrofa OX=9823 GN=ATP5F1A PE=1 SV=3	ATP5F1A	1	1.42079e-43	303.02	3	VVDALGNAIDGK(1)GPIGSK(1)TR	0.46658	1.44201	1.54333	1.781		0.135972	0.0976911
Biological Process	GO:0090407	6	organophosphate biosynthetic process	1.41	0.00198558	A0A287AJ16	45	K	3.441	0.0430235	Up	Acyl-CoA synthetase bubblegum family member 2 OS=Sus scrofa OX=9823 GN=ACSBG2 PE=1 SV=2	ACSBG2	1	7.593e-12	190.25	3	LSK(1)HGPGHETPMTIPEFFR	-0.018293	1.60297	0.666282	2.37979	0.499939	0.429165	0.421856
Biological Process	GO:0090407	6	organophosphate biosynthetic process	1.41	0.00198558	A0A287AZF9	311	K	6.232	0.00125867	Up	Cytochrome c1 OS=Sus scrofa OX=9823 GN=CYC1 PE=1 SV=1	CYC1	1	0.0142064	126.52	2	HK(1)WSVLK	0.10783	2.0085	2.0215		0.404383	0.286648	0.278968
Biological Process	GO:0090407	6	organophosphate biosynthetic process	1.41	0.00198558	A0A287AZF9	316	K	11.245	0.00166975	Up	Cytochrome c1 OS=Sus scrofa OX=9823 GN=CYC1 PE=1 SV=1	CYC1	1	0.0166971	120.92	2	WSVLK(1)SR	-0.02028	1.62946	1.48939	2.39115	0.264539	0.0977829	0.127682
Biological Process	GO:0090407	6	organophosphate biosynthetic process	1.41	0.00198558	F1RPS8	153	K	11.08	0.000458136	Up	ATP synthase subunit alpha OS=Sus scrofa OX=9823 GN=ATP5F1A PE=1 SV=3	ATP5F1A	1	0.00107516	163.67	3	VVDALGNAIDGK(1)GPIGSK(1)TR	0.46658	1.52481	1.77889	2.1996	0.234481	0.145184	0.117033
Biological Process	GO:0090407	6	organophosphate biosynthetic process	1.41	0.00198558	A0A287AZQ6	414	K	8.498	0.0189776	Up	Nucleoside-diphosphate kinase OS=Sus scrofa OX=9823 GN=AK9 PE=4 SV=2	AK9	1	0.00246679	88.187	2	TTLSNLLAK(1)HYK	0.15152	1.24317	1.19135	2.93378	0.456176	0.090768	0.0847526
Biological Process	GO:0090407	6	organophosphate biosynthetic process	1.41	0.00198558	A0A287B2H7	27	K	9.41	0.000640596	Up	L-lactate dehydrogenase OS=Sus scrofa OX=9823 GN=LDHA PE=3 SV=1	LDHA	1	8.76591e-06	204	2	IPFGSK(1)STMATLK	0.09702	1.57728	1.35798	2.48837	0.244205	0.181847	0.150321
Biological Process	GO:0090407	6	organophosphate biosynthetic process	1.41	0.00198558	A0A287B2H7	88	K	8.849	0.00786298	Up	L-lactate dehydrogenase OS=Sus scrofa OX=9823 GN=LDHA PE=3 SV=1	LDHA	1	9.045e-09	201.3	3	LK(1)GEMMDLQHGSLFLR	-0.87575	1.08174	1.39151	2.17644	0.225115	0.125195
Biological Process	GO:0090407	6	organophosphate biosynthetic process	1.41	0.00198558	A0A287B2H7	253	K	4.195	0.0188506	Up	L-lactate dehydrogenase OS=Sus scrofa OX=9823 GN=LDHA PE=3 SV=1	LDHA	1	0.000666693	98.572	3	NLHPELGTDADK(1)EHWK	0.4551	1.43181	0.955315	2.45789	0.557872	0.36457	0.232546
Biological Process	GO:0090407	6	organophosphate biosynthetic process	1.41	0.00198558	A0A287B2H7	105	K	3.079	0.0390578	Up	L-lactate dehydrogenase OS=Sus scrofa OX=9823 GN=LDHA PE=3 SV=1	LDHA	1	0.0116506	110.79	2	TPK(1)IVSGK	-1.0115	1.08917	1.65129	1.36967	0.61528		0.274596
Biological Process	GO:0090407	6	organophosphate biosynthetic process	1.41	0.00198558	A0A287B2H7	346	K	4.975	0.00557657	Up	L-lactate dehydrogenase OS=Sus scrofa OX=9823 GN=LDHA PE=3 SV=1	LDHA	1	7.50937e-05	156.48	2	VTLTPEEEAHLK(1)K	-0.11169	1.82187		2.01984	0.517976	0.285752	0.354564
Biological Process	GO:0090407	6	organophosphate biosynthetic process	1.41	0.00198558	A0A287BD08	313	K	8.864	0.0024656	Up	Glycerol kinase OS=Sus scrofa OX=9823 PE=3 SV=2	--	1	6.75027e-07	216.97	2	DNLGIIK(1)TSEEIEK	-0.59689	1.35208	1.46337	2.5763	0.313949	0.153868	0.140436
Biological Process	GO:0090407	6	organophosphate biosynthetic process	1.41	0.00198558	A0A287BD08	138	K	27.686	0.000573115	Up	Glycerol kinase OS=Sus scrofa OX=9823 PE=3 SV=2	--	1	0.000734779	135.86	2	IIPVNNNFVK(1)TK	0.52742	1.87164	1.15282	1.85797	0.0622184	0.0553478
Biological Process	GO:0090407	6	organophosphate biosynthetic process	1.41	0.00198558	A0A287BD08	140	K	30.044	0.000669287	Up	Glycerol kinase OS=Sus scrofa OX=9823 PE=3 SV=2	--	1	6.32007e-06	143.42	2	TK(1)TGLPLSTYFSAVK	-0.39075	1.44583	1.23135	2.21428	0.0563402		0.0521993
Biological Process	GO:0090407	6	organophosphate biosynthetic process	1.41	0.00198558	A0A288CFT0	197	K	19.803	0.00647645	Up	Triosephosphate isomerase OS=Sus scrofa OX=9823 GN=TPI1 PE=1 SV=1	TPI1	1	1.14588e-11	198.87	2	DWNK(1)VVLAYEPVWAIGTGK	-0.10375	1.36588	0.935561	3.41015	0.187713	0.0478739	0.0528277
Biological Process	GO:0090407	6	organophosphate biosynthetic process	1.41	0.00198558	A0A287B2H7	43	K	6.535	0.0122783	Up	L-lactate dehydrogenase OS=Sus scrofa OX=9823 GN=LDHA PE=3 SV=1	LDHA	1	2.50729e-11	191.95	3	DQLIHNLLK(1)EEHVPHNK	-0.46433	1.51358	1.54076	2.14935	0.530619	0.150079	0.115608
Biological Process	GO:0090407	6	organophosphate biosynthetic process	1.41	0.00198558	F1RPS8	225	K	13.364	0.000649063	Up	ATP synthase subunit alpha OS=Sus scrofa OX=9823 GN=ATP5F1A PE=1 SV=3	ATP5F1A	1	0.000260482	187	2	FNDGTDEK(1)K	1.2035	1.90015	1.87754	1.8046	0.198672	0.0773178	0.141718
Biological Process	GO:0090407	6	organophosphate biosynthetic process	1.41	0.00198558	F1RPS8	118	K	12.854	0.00115534	Up	ATP synthase subunit alpha OS=Sus scrofa OX=9823 GN=ATP5F1A PE=1 SV=3	ATP5F1A	1	0.019564	107.67	2	LIK(1)EGDIVK(1)R	-0.44145	1.49119	1.83265	2.24306	0.208517	0.147838	0.0767422
Biological Process	GO:0090407	6	organophosphate biosynthetic process	1.41	0.00198558	F1RPS8	302	K	3.929	0.0151285	Up	ATP synthase subunit alpha OS=Sus scrofa OX=9823 GN=ATP5F1A PE=1 SV=3	ATP5F1A	1	5.95734e-83	361.51	2	HALIIYDDLSK(1)QAVAYR	-0.44899	1.89732	0.948302	1.93722	0.494625	0.484684	0.237856
Biological Process	GO:0090407	6	organophosphate biosynthetic process	1.41	0.00198558	A0A287A2Y4	72	K	7.357	0.00117247	Up	ATP synthase subunit d, mitochondrial OS=Sus scrofa OX=9823 GN=ATP5PD PE=1 SV=1	ATP5PD	1	0.000261988	138.98	2	ATVAK(1)AGLVDDFEK(1)K	0.28055	1.91653	1.58483	1.78071	0.363496	0.166587	0.187844
Biological Process	GO:0090407	6	organophosphate biosynthetic process	1.41	0.00198558	A0A287A2Y4	32	K	2.864	0.02406	Up	ATP synthase subunit d, mitochondrial OS=Sus scrofa OX=9823 GN=ATP5PD PE=1 SV=1	ATP5PD	1	1.40463e-30	286.61	3	AIANSLK(1)SWNETLSTR	-0.32778	1.11065	1.46278	1.87393	0.688397	0.284448	0.579791
Biological Process	GO:0090407	6	organophosphate biosynthetic process	1.41	0.00198558	A0A287A2Y4	63	K	1.771	0.0320767	Up	ATP synthase subunit d, mitochondrial OS=Sus scrofa OX=9823 GN=ATP5PD PE=1 SV=1	ATP5PD	1	1.91006e-05	177.1	2	ATVAK(1)AGLVDDFEK(1)K	0.28055	1.16394	1.45512	1.21576	0.967286	0.659947	0.537943
Biological Process	GO:0090407	6	organophosphate biosynthetic process	1.41	0.00198558	A0A287A2Y4	148	K	6.912	0.00528176	Up	ATP synthase subunit d, mitochondrial OS=Sus scrofa OX=9823 GN=ATP5PD PE=1 SV=1	ATP5PD	1	7.26341e-05	145.29	3	K(1)K(1)YPYWPHRPIESL	0.044469	1.10346	1.89271	1.56397	0.26881	0.171044
Biological Process	GO:0090407	6	organophosphate biosynthetic process	1.41	0.00198558	A0A287A2Y4	149	K	15.105	0.000870008	Up	ATP synthase subunit d, mitochondrial OS=Sus scrofa OX=9823 GN=ATP5PD PE=1 SV=1	ATP5PD	1	7.26341e-05	193.96	2	K(1)YPYWPHRPIESL	0.72367	1.63458	2.00677	1.98609	0.20609	0.0759565	0.0905098
Biological Process	GO:0090407	6	organophosphate biosynthetic process	1.41	0.00198558	A0A287A2Y4	123	K	7.854	0.00734106	Up	ATP synthase subunit d, mitochondrial OS=Sus scrofa OX=9823 GN=ATP5PD PE=1 SV=1	ATP5PD	1	5.87873e-09	158.17	3	MK(1)NIIPFDQMTIEDLNEVFPETK	0.0019063	1.2836	1.58666	2.45207	0.412609	0.113884	0.151176
Biological Process	GO:0090407	6	organophosphate biosynthetic process	1.41	0.00198558	A0A287A2Y4	144	K	10.705	0.00508917	Up	ATP synthase subunit d, mitochondrial OS=Sus scrofa OX=9823 GN=ATP5PD PE=1 SV=1	ATP5PD	1	9.44138e-18	188.58	3	NIIPFDQMTIEDLNEVFPETK(1)LDK	0.53789	1.96876	2.12742	1.39122	0.324482	0.114467	0.0736532
Biological Process	GO:0090407	6	organophosphate biosynthetic process	1.41	0.00198558	A0A287A2Y4	99	K	6.393	0.00356443	Up	ATP synthase subunit d, mitochondrial OS=Sus scrofa OX=9823 GN=ATP5PD PE=1 SV=1	ATP5PD	1	6.46991e-80	355.67	2	YTALVDAEEQEDVK(1)R	2.9863	1.64586	1.67357	1.86901	0.455108	0.164364	0.192083
Biological Process	GO:0090407	6	organophosphate biosynthetic process	1.41	0.00198558	P50578	263	K	2.451	0.0105	Up	Aldo-keto reductase family 1 member A1 OS=Sus scrofa OX=9823 GN=AKR1A1 PE=1 SV=3	AKR1A1	1	0.0014477	123.63	2	VICIPK(1)SVTPSR	0.036574	1.14625	1.43403	1.68123	0.713453	0.408296	0.616732
Biological Process	GO:0090407	6	organophosphate biosynthetic process	1.41	0.00198558	A0A5G2QK91	30	K	12.153	0.000286857	Up	ATP synthase subunit OS=Sus scrofa OX=9823 GN=ATP5MG PE=1 SV=1	ATP5MG	1	1.84407e-10	130.51	4	LATFWHYAK(1)VELVPPTPAEIPTAIQSLK	0.34295	1.59495	1.72394	2.22495	0.192848	0.160486	0.10283
Biological Process	GO:0090407	6	organophosphate biosynthetic process	1.41	0.00198558	A0A287A9I8	66	K	18.036	0.000416059	Up	ATP synthase subunit gamma OS=Sus scrofa OX=9823 GN=ATP5F1C PE=1 SV=2	ATP5F1C	1	4.48544e-13	244.24	3	K(1)HLIIGVSSDR	0.12083	1.66008	1.5812	2.44353	0.147671	0.101623	0.0658968
Biological Process	GO:0090407	6	organophosphate biosynthetic process	1.41	0.00198558	A0A287A9I8	238	K	4.294	0.0366704	Up	ATP synthase subunit gamma OS=Sus scrofa OX=9823 GN=ATP5F1C PE=1 SV=2	ATP5F1C	1	2.4141e-43	302.28	2	MTAMDNASK(1)NASEMIDK	-0.81589	1.30779	1.17205	1.84815	0.500644	0.171365
Biological Process	GO:0090407	6	organophosphate biosynthetic process	1.41	0.00198558	A0A287A9I8	91	K	9.588	0.00257895	Up	ATP synthase subunit gamma OS=Sus scrofa OX=9823 GN=ATP5F1C PE=1 SV=2	ATP5F1C	1	1.56419e-10	238.92	2	QIK(1)SEVANLTAAGK	0.24297	1.92458	1.30582	2.20294	0.303776	0.158648	0.104231
Biological Process	GO:0090407	6	organophosphate biosynthetic process	1.41	0.00198558	A0A287A9I8	173	K	34.711	0.0006569	Up	ATP synthase subunit gamma OS=Sus scrofa OX=9823 GN=ATP5F1C PE=1 SV=2	ATP5F1C	1	2.26454e-42	229.71	2	SVISYK(1)TEEK	-0.14883	2.0806	1.84087	1.91051	0.102915	0.0333116	0.0317885
Biological Process	GO:0090407	6	organophosphate biosynthetic process	1.41	0.00198558	A0A287AAR5	151	K	4.303	0.00791817	Up	Acyl carrier protein OS=Sus scrofa OX=9823 GN=NDUFAB1 PE=1 SV=1	NDUFAB1	1	1.20085e-08	156.69	2	LMCPQEIVDYIADK(1)K	-0.18078	1.46521	1.78049		0.344468	0.40983
Biological Process	GO:0090407	6	organophosphate biosynthetic process	1.41	0.00198558	P13618	67	K	3.633	0.0252941	Up	ATP synthase-coupling factor 6, mitochondrial OS=Sus scrofa OX=9823 GN=ATP5PF PE=1 SV=1	ATP5PF	0.998527	0.0114483	58.272	3	ADMNTFPNFTFEDPK(0.999)FEAVEK(0.001)PQS	-1.2517		1.79893	1.33762		0.494988	0.368457
Biological Process	GO:0090407	6	organophosphate biosynthetic process	1.41	0.00198558	P13618	47	K	10.17	0.00150594	Up	ATP synthase-coupling factor 6, mitochondrial OS=Sus scrofa OX=9823 GN=ATP5PF PE=1 SV=1	ATP5PF	1	0.0146676	123.99	2	LK(1)QMYGK	0.028819	1.45186	1.68741	2.32359	0.277685	0.108966	0.150486
Biological Process	GO:0090407	6	organophosphate biosynthetic process	1.41	0.00198558	F1RPS8	517	K	2.54	0.00416139	Up	ATP synthase subunit alpha OS=Sus scrofa OX=9823 GN=ATP5F1A PE=1 SV=3	ATP5F1A	1	5.69356e-05	170.89	2	ADGK(1)ISEETDAK(1)LK	0.41523	1.3169	1.58469	1.4034	0.745737	0.456061	0.493214
Biological Process	GO:0090407	6	organophosphate biosynthetic process	1.41	0.00198558	F1RPS8	525	K	12.748	0.000317467	Up	ATP synthase subunit alpha OS=Sus scrofa OX=9823 GN=ATP5F1A PE=1 SV=3	ATP5F1A	1	5.69356e-05	142.12	2	ISEETDAK(1)LK	0.37504	1.73268	1.85668	1.9742	0.205298	0.135448	0.0956943
Biological Process	GO:0090407	6	organophosphate biosynthetic process	1.41	0.00198558	F1RPS8	527	K	12.568	0.00267292	Up	ATP synthase subunit alpha OS=Sus scrofa OX=9823 GN=ATP5F1A PE=1 SV=3	ATP5F1A	1	0.000536066	124.1	2	LK(1)EIVTNFLAGFEA	0.10938	1.50475	3.13778	0.915246	0.146854	0.133107	0.162262
Biological Process	GO:0090407	6	organophosphate biosynthetic process	1.41	0.00198558	F1RPS8	291	K	21.279	0.000154629	Up	ATP synthase subunit alpha OS=Sus scrofa OX=9823 GN=ATP5F1A PE=1 SV=3	ATP5F1A	1	2.91638e-65	349.01	2	DNGK(1)HALIIYDDLSK	-0.018784	1.55562	1.62106	2.55401	0.118627	0.0742585	0.0764279
Biological Process	GO:0090407	6	organophosphate biosynthetic process	1.41	0.00198558	A0A288CFT0	212	K	18.751	0.00428896	Up	Triosephosphate isomerase OS=Sus scrofa OX=9823 GN=TPI1 PE=1 SV=1	TPI1	1	8.1557e-47	261.82	3	VVLAYEPVWAIGTGK(1)TATPQQAQEVHEK	0.097209	0.87018	1.45861	3.36743	0.16581	0.069041	0.0689358
Biological Process	GO:0090407	6	organophosphate biosynthetic process	1.41	0.00198558	A0A286ZYX8	234	K	2.381	0.0415831	Up	Fructose-bisphosphate aldolase OS=Sus scrofa OX=9823 GN=ALDOA PE=1 SV=2	ALDOA	1	2.95095e-13	158.67	3	ALSDHHIYLEGTLLK(1)PNMVTPGHACTQK	-0.01806	1.89148	0.891527	1.44233	0.394682	0.708463	0.671513
Biological Process	GO:0090407	6	organophosphate biosynthetic process	1.41	0.00198558	A0A288CFT0	275	K	5.161	0.00871995	Up	Triosephosphate isomerase OS=Sus scrofa OX=9823 GN=TPI1 PE=1 SV=1	TPI1	1	5.29723e-11	138.36	3	ELASQPDVDGFLVGGASLK(1)PEFVDIINAK	0.2365	1.12545	1.38587	1.91667	0.353353		0.218663
Biological Process	GO:0090407	6	organophosphate biosynthetic process	1.41	0.00198558	A0A288CFT0	43	K	4.625	0.00548994	Up	Triosephosphate isomerase OS=Sus scrofa OX=9823 GN=TPI1 PE=1 SV=1	TPI1	1	0.000224311	168.45	2	K(1)FFVGGNWK	-0.28433	1.30716	1.12646	2.49979	0.279981	0.417388	0.36922
Biological Process	GO:0090407	6	organophosphate biosynthetic process	1.41	0.00198558	A0A5G2QPK6	158	K	21.78	0.00019812	Up	Dihydrolipoyl dehydrogenase OS=Sus scrofa OX=9823 GN=DLD PE=1 SV=1	DLD	1	9.13913e-100	377.19	2	NQVTATK(1)ADGSTEVINTK	-0.156	1.61789	2.19801	1.92072	0.121481	0.0855181	0.0563852
Biological Process	GO:0090407	6	organophosphate biosynthetic process	1.41	0.00198558	A0A5G2QPK6	119	K	12.123	0.00472041	Up	Dihydrolipoyl dehydrogenase OS=Sus scrofa OX=9823 GN=DLD PE=1 SV=1	DLD	1	9.06167e-05	179.1	2	MMEQK(1)SNAVK	-0.32445	1.39617	0.839096	3.30751	0.181401	0.130613	0.145213
Biological Process	GO:0090407	6	organophosphate biosynthetic process	1.41	0.00198558	A0A5G2QPK6	124	K	11.949	0.0040856	Up	Dihydrolipoyl dehydrogenase OS=Sus scrofa OX=9823 GN=DLD PE=1 SV=1	DLD	1	1.49524e-09	167.14	3	SNAVK(1)ALTGGIAHLFK(1)QNK	-0.511	2.07125	0.955968	1.70857	0.123067	0.141145
Biological Process	GO:0090407	6	organophosphate biosynthetic process	1.41	0.00198558	A0A5G2QPK6	402	K	2.117	0.0256796	Up	Dihydrolipoyl dehydrogenase OS=Sus scrofa OX=9823 GN=DLD PE=1 SV=1	DLD	1	6.03025e-06	209.19	2	SEEQLK(1)EEGIEYK	0.28517	1.32037	1.83202	0.922558	0.625911	0.712405	0.586733
Biological Process	GO:0090407	6	organophosphate biosynthetic process	1.41	0.00198558	A0A5G2QR66	68	K	15.706	1.28669e-05	Up	Phosphatidate cytidylyltransferase, mitochondrial OS=Sus scrofa OX=9823 GN=TAMM41 PE=1 SV=1	TAMM41	1	0.000231639	125.72	3	K(1)NWNHYSFLK	-0.63024	1.56394	1.98784	2.08907	0.110432	0.133046	0.115675
Biological Process	GO:0090407	6	organophosphate biosynthetic process	1.41	0.00198558	A0A5G2QSG9	137	K	31.739	0.00077276	Up	Dihydrolipoamide acetyltransferase component of pyruvate dehydrogenase complex OS=Sus scrofa OX=9823 GN=PDHX PE=1 SV=1	PDHX	1	2.03991e-20	220.6	2	LGSLIGLLVEEGEDWK(1)HVEIPK	0.30876	1.78794	2.60606	1.42273	0.0933109	0.0290634	0.0608926
Biological Process	GO:0090407	6	organophosphate biosynthetic process	1.41	0.00198558	A0A5G2QSG9	311	K	11.655	0.000159381	Up	Dihydrolipoamide acetyltransferase component of pyruvate dehydrogenase complex OS=Sus scrofa OX=9823 GN=PDHX PE=1 SV=1	PDHX	1	1.62774e-104	382.95	4	STIPHAYATADCDLGAVLK(1)VR	-1.6514	1.89385	1.45841	2.17363	0.200507	0.146317	0.127292
Biological Process	GO:0090407	6	organophosphate biosynthetic process	1.41	0.00198558	A0A5G2QSG9	191	K	20.177	0.000113065	Up	Dihydrolipoamide acetyltransferase component of pyruvate dehydrogenase complex OS=Sus scrofa OX=9823 GN=PDHX PE=1 SV=1	PDHX	1	4.28436e-139	427.61	3	NILEK(1)HALDANQGTATGPR	0.1433	1.54938	2.28695	1.88034	0.124763	0.0705528	0.0880149
Biological Process	GO:0090407	6	organophosphate biosynthetic process	1.41	0.00198558	A0A5G2QSG9	170	K	7.66	0.00876038	Up	Dihydrolipoamide acetyltransferase component of pyruvate dehydrogenase complex OS=Sus scrofa OX=9823 GN=PDHX PE=1 SV=1	PDHX	1	0.00244504	75.533	3	PSVPPPPSPQPQISTPVK(1)K	0.24889		2.09625	1.44186	0.238889		0.223003
Biological Process	GO:0090407	6	organophosphate biosynthetic process	1.41	0.00198558	A0A5G2QPK6	151	K	12.703	0.000528701	Up	Dihydrolipoyl dehydrogenase OS=Sus scrofa OX=9823 GN=DLD PE=1 SV=1	DLD	1	5.05413e-10	201.61	3	ITGK(1)NQVTATK(1)ADGSTEVINTK	0.16389	1.75435	1.80692	2.00089	0.222108	0.0946223	0.121115
Biological Process	GO:0090407	6	organophosphate biosynthetic process	1.41	0.00198558	A0A5G2R718	34	K	6.023	0.0316931	Up	Pyruvate dehydrogenase E1 component subunit beta OS=Sus scrofa OX=9823 GN=PDHB PE=1 SV=1	PDHB	1	1.04594e-20	167.61	4	DAINQGMDEELERDEK(1)VFLLGEEVAQYDGAYK	-0.31808	1.03207	2.48971	0.97998	0.326682		0.171565
Biological Process	GO:0090407	6	organophosphate biosynthetic process	1.41	0.00198558	A0A5G2R718	336	K	25.703	0.000583753	Up	Pyruvate dehydrogenase E1 component subunit beta OS=Sus scrofa OX=9823 GN=PDHB PE=1 SV=1	PDHB	1	0.0255332	92.307	3	ILEDNSVPQVK(1)DIIFAIK(1)K	0.31701	1.47854	1.75327	2.5435	0.122807	0.0521125	0.0497732
Biological Process	GO:0090407	6	organophosphate biosynthetic process	1.41	0.00198558	A0A5G2R718	170	K	11.034	0.000616898	Up	Pyruvate dehydrogenase E1 component subunit beta OS=Sus scrofa OX=9823 GN=PDHB PE=1 SV=1	PDHB	1	0.00690861	120.65	2	GLIK(1)SAIR	-0.50635	1.84458	1.33623	2.32059	0.233349	0.133349	0.131903
Biological Process	GO:0090407	6	organophosphate biosynthetic process	1.41	0.00198558	A0A5G2R718	240	K	6.879	0.0205121	Up	Pyruvate dehydrogenase E1 component subunit beta OS=Sus scrofa OX=9823 GN=PDHB PE=1 SV=1	PDHB	1	2.61644e-25	205.84	4	PVGHCLEAATVLSK(1)EGIECEVINMR	-0.21928	1.99621	1.82199	0.740027	0.215947		0.22583
Biological Process	GO:0090407	6	organophosphate biosynthetic process	1.41	0.00198558	A0A5G2R718	166	K	14.707	0.00444135	Up	Pyruvate dehydrogenase E1 component subunit beta OS=Sus scrofa OX=9823 GN=PDHB PE=1 SV=1	PDHB	1	8.42777e-07	162.68	3	VVSPWSSEDAK(1)GLIK	-0.13568	1.72959		2.80764	0.214388	0.151972	0.0964119
Biological Process	GO:0090407	6	organophosphate biosynthetic process	1.41	0.00198558	A0A5G2QYJ0	142	K	26.271	0.00074082	Up	Haloacid dehalogenase like hydrolase domain containing 5 OS=Sus scrofa OX=9823 GN=HDHD5 PE=1 SV=1	HDHD5	1	2.54388e-05	196.24	2	ALGFK(1)SLVTVDELR	-1.0905	1.4421	1.99642	2.34147	0.102025	0.0348012	0.0831858
Biological Process	GO:0090407	6	organophosphate biosynthetic process	1.41	0.00198558	A0A5G2R1T1	320	K	4.876	0.00819679	Up	Cysteine desulfurase, mitochondrial OS=Sus scrofa OX=9823 GN=NFS1 PE=1 SV=1	NFS1	1	8.44029e-22	192.25	4	SGTVPTPLVVGLGAACEVAQQEMEYDHK(1)R	0.1065	1.34936	1.32625	1.72304	0.39259	0.208761
Biological Process	GO:0090407	6	organophosphate biosynthetic process	1.41	0.00198558	F1SUF2	829	K	4.145	0.0183163	Up	Hexokinase OS=Sus scrofa OX=9823 GN=HK1 PE=1 SV=4	HK1	1	0.00228463	122.19	2	TVCGVVSK(1)R	-1.1759	1.63633		2.03518	0.666992	0.344027	0.317473
Biological Process	GO:0090407	6	organophosphate biosynthetic process	1.41	0.00198558	F1SUF2	489	K	2.587	0.0131535	Up	Hexokinase OS=Sus scrofa OX=9823 GN=HK1 PE=1 SV=4	HK1	1	0.000674092	182.13	2	DMLLEVK(1)R	0.42517	1.10817	1.13981	2.07915	0.536716	0.625178	0.510974
Biological Process	GO:0090407	6	organophosphate biosynthetic process	1.41	0.00198558	F1SUF2	48	K	5.221	0.000419509	Up	Hexokinase OS=Sus scrofa OX=9823 GN=HK1 PE=1 SV=4	HK1	1	0.00917649	125.31	2	EMK(1)NGLSR	0.58246	1.29211	1.63502	2.10837	0.357652	0.301056	0.305792
Biological Process	GO:0090407	6	organophosphate biosynthetic process	1.41	0.00198558	A0A5G2R718	50	K	6.433	0.000338382	Up	Pyruvate dehydrogenase E1 component subunit beta OS=Sus scrofa OX=9823 GN=PDHB PE=1 SV=1	PDHB	1	2.1295e-55	321.67	3	VFLLGEEVAQYDGAYK(1)VSR	-0.11923	1.30726	1.5305	1.69276	0.241922	0.227567
Biological Process	GO:0090407	6	organophosphate biosynthetic process	1.41	0.00198558	A0A5G2QPK6	259	K	4.306	0.00171738	Up	Dihydrolipoyl dehydrogenase OS=Sus scrofa OX=9823 GN=DLD PE=1 SV=1	DLD	1	0.000942284	135.83	2	ILQK(1)QGFK(1)FK	-0.29711	1.38859	1.8666	1.61407	0.515362	0.282005	0.333363
Biological Process	GO:0090407	6	organophosphate biosynthetic process	1.41	0.00198558	A0A5G2QPK6	338	K	5.662	0.00569049	Up	Dihydrolipoyl dehydrogenase OS=Sus scrofa OX=9823 GN=DLD PE=1 SV=1	DLD	1	2.12613e-09	154.65	3	FQTK(1)IPNIYAIGDVVAGPMLAHK	-0.4543	1.04519	1.32725	2.7269	0.242605	0.311758	0.346298
Biological Process	GO:0090407	6	organophosphate biosynthetic process	1.41	0.00198558	A0A5G2QPK6	269	K	10.152	0.000750656	Up	Dihydrolipoyl dehydrogenase OS=Sus scrofa OX=9823 GN=DLD PE=1 SV=1	DLD	1	0.00021351	178.55	2	LNTK(1)VIGATK	-0.50256	1.41263	1.84138	2.20799	0.246217	0.175624	0.11616
Biological Process	GO:0090407	6	organophosphate biosynthetic process	1.41	0.00198558	A0A288CFT0	96	K	5.781	0.0114108	Up	Triosephosphate isomerase OS=Sus scrofa OX=9823 GN=TPI1 PE=1 SV=1	TPI1	1	2.86278e-06	205.13	3	LDPK(1)IAVAAQNCYK	0.097927	1.76894	1.38514	1.96105	0.551205	0.132455	0.201207
Biological Process	GO:0090407	6	organophosphate biosynthetic process	1.41	0.00198558	A0A2C9F3A3	162	K	13.487	0.000396689	Up	ATP synthase peripheral stalk subunit OSCP OS=Sus scrofa OX=9823 GN=ATP5PO PE=3 SV=1	ATP5PO	1	0.00154211	131.44	2	TVLK(1)SFLSK	0.69706	2.08186	1.54456	1.95942	0.198325	0.123964	0.0918761
Biological Process	GO:0090407	6	organophosphate biosynthetic process	1.41	0.00198558	A0A2C9F3A3	54	K	3.295	0.000528022	Up	ATP synthase peripheral stalk subunit OSCP OS=Sus scrofa OX=9823 GN=ATP5PO PE=3 SV=1	ATP5PO	1	9.69164e-06	204.79	2	QNK(1)LEQVEK	2.6593	1.39422	1.54617	1.66272	0.562289	0.390779	0.443826
Biological Process	GO:0090407	6	organophosphate biosynthetic process	1.41	0.00198558	A0A2C9F3A3	90	K	7.594	0.00189092	Up	ATP synthase peripheral stalk subunit OSCP OS=Sus scrofa OX=9823 GN=ATP5PO PE=3 SV=1	ATP5PO	1	0.00185402	121.73	2	VK(1)SLSDMTAK	-0.08359	1.64903	1.52195	2.13086	0.366611	0.153366	0.178175
Biological Process	GO:0090407	6	organophosphate biosynthetic process	1.41	0.00198558	A0A2C9F3A3	199	K	3.734	0.00703002	Up	ATP synthase peripheral stalk subunit OSCP OS=Sus scrofa OX=9823 GN=ATP5PO PE=3 SV=1	ATP5PO	1	0.00784711	107.57	2	YVDMSAK(1)TK	-0.84839		1.96565	1.60134	0.602422	0.465235	0.365349
Biological Process	GO:0090407	6	organophosphate biosynthetic process	1.41	0.00198558	A0A480VIL3	147	K	5.487	0.00268241	Up	ATP-dependent (S)-NAD(P)H-hydrate dehydratase OS=Sus scrofa OX=9823 GN=NAXD PE=1 SV=1	NAXD	1	0.00170046	92.939	3	DHVLLENVK(1)GILEASK	-1.0147	1.5874	1.74007	1.74761	0.4613	0.184271	0.279355
Biological Process	GO:0090407	6	organophosphate biosynthetic process	1.41	0.00198558	A0A480VIL3	49	K	5.414	0.000715944	Up	ATP-dependent (S)-NAD(P)H-hydrate dehydratase OS=Sus scrofa OX=9823 GN=NAXD PE=1 SV=1	NAXD	1	0.0274878	71.349	2	NIIPPLTTK(1)K	0.27894	1.60757	1.72037	1.73666	0.219202	0.411094	0.305103
Biological Process	GO:0090407	6	organophosphate biosynthetic process	1.41	0.00198558	I3L6E7	204	K	7.502	0.00359338	Up	Phosphoethanolamine/phosphocholine phosphatase isoform 1 OS=Sus scrofa OX=9823 GN=PHOSPHO1 PE=3 SV=2	PHOSPHO1	1	3.20692e-06	215.38	2	HK(1)VLSDYLR	-0.61913	1.90621	1.42419	1.96391	0.398911	0.133244	0.173539
Biological Process	GO:0090407	6	organophosphate biosynthetic process	1.41	0.00198558	A0A5G2QGS5	189	K	7.57	0.00461557	Up	Acetyl-CoA acetyltransferase 1 OS=Sus scrofa OX=9823 GN=ACAT1 PE=1 SV=1	ACAT1	1	1.45144e-17	199.61	3	DGLTDVYNK(1)IHMGNCAENTAK	-0.045735	2.1555	2.01764		0.377836	0.183822	0.265202
Biological Process	GO:0090407	6	organophosphate biosynthetic process	1.41	0.00198558	A0A5G2QGS5	244	K	12.716	0.000615442	Up	Acetyl-CoA acetyltransferase 1 OS=Sus scrofa OX=9823 GN=ACAT1 PE=1 SV=1	ACAT1	1	9.35826e-08	212.59	2	GK(1)PDTVVKEDEEYKR	-0.14921	1.5701	1.94238	2.05008	0.221611	0.121732	0.0940989
Biological Process	GO:0090407	6	organophosphate biosynthetic process	1.41	0.00198558	A0A5G2QGS5	250	K	11.974	0.0032655	Up	Acetyl-CoA acetyltransferase 1 OS=Sus scrofa OX=9823 GN=ACAT1 PE=1 SV=1	ACAT1	1	8.23212e-40	308.74	2	GKPDTVVK(1)EDEEYKR	0.19203	1.50355	1.55256	1.68019	0.181169		0.0825359
Biological Process	GO:0090407	6	organophosphate biosynthetic process	1.41	0.00198558	A0A5G2QGS5	267	K	12.183	0.0100254	Up	Acetyl-CoA acetyltransferase 1 OS=Sus scrofa OX=9823 GN=ACAT1 PE=1 SV=1	ACAT1	1	0.00533267	173.11	2	LK(1)TVFQK	0.48107	1.52684	1.38348	1.83026	0.198907		0.0605114
Biological Process	GO:0090407	6	organophosphate biosynthetic process	1.41	0.00198558	A0A5G2QGS5	123	K	2.893	0.00648098	Up	Acetyl-CoA acetyltransferase 1 OS=Sus scrofa OX=9823 GN=ACAT1 PE=1 SV=1	ACAT1	1	4.41462e-10	151.42	3	QAVLGAGLPISTPCTTINK(1)VCASGMK	1.4209	1.05519	1.54805	1.46041	0.464522		0.471823
Biological Process	GO:0090407	6	organophosphate biosynthetic process	1.41	0.00198558	A0A5G2QGS5	222	K	11.922	0.00257753	Up	Acetyl-CoA acetyltransferase 1 OS=Sus scrofa OX=9823 GN=ACAT1 PE=1 SV=1	ACAT1	1	0.0158276	91.085	2	SK(1)AAWEAGK	-0.74953	2.24838	2.19285		0.26981	0.14756	0.141401
Biological Process	GO:0090407	6	organophosphate biosynthetic process	1.41	0.00198558	A0A5G2QGS5	262	K	25.223	0.000792457	Up	Acetyl-CoA acetyltransferase 1 OS=Sus scrofa OX=9823 GN=ACAT1 PE=1 SV=1	ACAT1	1	0.00402759	132.57	2	VDFNK(1)VPK	0.10583	1.23796	1.78037	1.85292		0.0781217	0.050632
Biological Process	GO:0090407	6	organophosphate biosynthetic process	1.41	0.00198558	A0A5G2QIE6	270	K	8.54	0.0212944	Up	Acetyltransferase component of pyruvate dehydrogenase complex OS=Sus scrofa OX=9823 GN=DLAT PE=1 SV=1	DLAT	1	4.7975e-11	229.29	2	GIDLTQIK(1)GTGPDGR	-0.11319	1.09551	1.33998	2.20244	0.27587	0.0862052
Biological Process	GO:0090407	6	organophosphate biosynthetic process	1.41	0.00198558	A0A5G2QIE6	367	K	18.394	2.74021e-05	Up	Acetyltransferase component of pyruvate dehydrogenase complex OS=Sus scrofa OX=9823 GN=DLAT PE=1 SV=1	DLAT	1	6.71423e-05	143.4	2	SK(1)ISVNDFIIK	0.035448	1.45822	2.10129	2.13112	0.0930524	0.105726	0.110598
Biological Process	GO:0090407	6	organophosphate biosynthetic process	1.41	0.00198558	A0A5G2QPK6	58	K	14.471	0.00105459	Up	Dihydrolipoyl dehydrogenase OS=Sus scrofa OX=9823 GN=DLD PE=1 SV=1	DLD	1	6.98919e-05	196.48	2	AAQLGFK(1)TVCIEK	0.0011054	1.63951	1.56697	2.40569	0.205739	0.0759641	0.106127
Biological Process	GO:0090407	6	organophosphate biosynthetic process	1.41	0.00198558	A0A5G2QPK6	96	K	7.669	0.00101237	Up	Dihydrolipoyl dehydrogenase OS=Sus scrofa OX=9823 GN=DLD PE=1 SV=1	DLD	1	6.69026e-49	313.04	4	ALLNNSHYYHMAHGK(1)DFASR	0.81498	1.90275	1.34769	2.05746	0.18081	0.180116	0.331169
Biological Process	GO:0090407	6	organophosphate biosynthetic process	1.41	0.00198558	A0A5G2QPK6	135	K	2.712	0.0179189	Up	Dihydrolipoyl dehydrogenase OS=Sus scrofa OX=9823 GN=DLD PE=1 SV=1	DLD	1	2.83008e-140	407.16	3	SNAVK(1)ALTGGIAHLFK(1)QNK	-0.511	1.39969	1.94509	1.03871	0.37931	0.71524	0.52196
Biological Process	GO:0090407	6	organophosphate biosynthetic process	1.41	0.00198558	A0A5G2QPK6	409	K	4.416	0.00806848	Up	Dihydrolipoyl dehydrogenase OS=Sus scrofa OX=9823 GN=DLD PE=1 SV=1	DLD	1	9.81057e-41	315.21	2	EEGIEYK(1)VGK	0.0090722	1.65767	1.73328	1.50127	0.597975	0.312334	0.197473
Biological Process	GO:0090407	6	organophosphate biosynthetic process	1.41	0.00198558	A0A288CFT0	231	K	10.596	0.0015008	Up	Triosephosphate isomerase OS=Sus scrofa OX=9823 GN=TPI1 PE=1 SV=1	TPI1	1	4.00474e-65	338.14	3	LRGWLK(1)THVSEAVAQSTR	-1.2846	2.1842	1.62926	1.66911	0.277105	0.141203	0.0991147
Biological Process	GO:0044782	7	cilium organization	1.52	0.00155348	A0A5G2QGK1	350	K	11.364	0.0357481	Up	Tubulin beta chain OS=Sus scrofa OX=9823 GN=TUBB4B PE=1 SV=1	TUBB4B	1	4.79316e-62	329.65	2	NSSYFVEWIPNNVK(1)TAVCDIPPR	0.23423	1.15309	0.753552	2.8163	0.212877		0.064183
Biological Process	GO:0090407	6	organophosphate biosynthetic process	1.41	0.00198558	A0A286ZYX8	346	K	13.397	8.81668e-05	Up	Fructose-bisphosphate aldolase OS=Sus scrofa OX=9823 GN=ALDOA PE=1 SV=2	ALDOA	1	1.8246e-68	350.18	2	ALANSLACQGK(1)YTPSGK	-0.050506	1.53952	1.70934	2.33438	0.143585	0.159933	0.113241
Biological Process	GO:0090407	6	organophosphate biosynthetic process	1.41	0.00198558	A0A5G2R4S0	101	K	8.453	0.000592505	Up	ATP synthase subunit b OS=Sus scrofa OX=9823 GN=ATP5PB PE=1 SV=1	ATP5PB	1	0.000182826	187	2	SQQALVQK(1)R	1.5433	1.3181	2.33146	1.71573	0.271491	0.170619	0.192593
Biological Process	GO:0044782	7	cilium organization	1.52	0.00155348	A0A5G2QNW8	122	K	40.572	0.0008097	Up	Dynein heavy chain 8, axonemal(predicted) OS=Sus scrofa OX=9823 PE=3 SV=1	--	1	0.000552886	143.04	2	VK(1)NEVQEVK	-0.90021	1.65197	1.09498	2.17222	0.0437508		0.0370796
Biological Process	GO:0044782	7	cilium organization	1.52	0.00155348	A0A5G2QQD3	459	K	4.8	0.00466506	Up	Outer dense fiber of sperm tails 2 OS=Sus scrofa OX=9823 GN=ODF2 PE=3 SV=1	ODF2	1	2.87206e-11	182.7	3	AEK(1)SEEYAEQLHVQLADK	0.1325	1.23089	1.80738	1.92731	0.444759	0.3879	0.201759
Biological Process	GO:0044782	7	cilium organization	1.52	0.00155348	A0A5G2QQD3	377	K	22.934	0.00235578	Up	Outer dense fiber of sperm tails 2 OS=Sus scrofa OX=9823 GN=ODF2 PE=3 SV=1	ODF2	1	0.000225348	148.32	2	AQAK(1)TASELSK	-0.020086		2.29616	2.3969	0.159082	0.0712524	0.076609
Biological Process	GO:0044782	7	cilium organization	1.52	0.00155348	A0A5G2QQD3	384	K	47.561	0.000112013	Up	Outer dense fiber of sperm tails 2 OS=Sus scrofa OX=9823 GN=ODF2 PE=3 SV=1	ODF2	1	4.46546e-14	254.53	2	TASELSK(1)SMESMR	0.80782	1.39487	2.06886	2.41271	0.0585644	0.0310926	0.0338989
Biological Process	GO:0044782	7	cilium organization	1.52	0.00155348	A0A5G2QQD3	581	K	23.541	0.00442824	Up	Outer dense fiber of sperm tails 2 OS=Sus scrofa OX=9823 GN=ODF2 PE=3 SV=1	ODF2	1	1.77101e-14	253.97	2	ASVK(1)NYEGMIDNYK	0.23787	1.08105	1.30815	3.36632	0.156912	0.0386281	0.0489472
Biological Process	GO:0044782	7	cilium organization	1.52	0.00155348	A0A5G2QQD3	591	K	22.227	0.000913048	Up	Outer dense fiber of sperm tails 2 OS=Sus scrofa OX=9823 GN=ODF2 PE=3 SV=1	ODF2	1	3.94375e-22	267.91	2	NYEGMIDNYK(1)SQVMK	-0.2147	1.37621	1.23724	3.12824	0.114997	0.0611951	0.0821271
Biological Process	GO:0044782	7	cilium organization	1.52	0.00155348	A0A5G2QQD3	241	K	28.673	7.79228e-05	Up	Outer dense fiber of sperm tails 2 OS=Sus scrofa OX=9823 GN=ODF2 PE=3 SV=1	ODF2	1	2.63086e-13	249.69	2	IKEEKDFTVLQK(1)K	-0.25951	1.7698	1.94951	2.07849	0.0892899	0.0679612	0.0449544
Biological Process	GO:0044782	7	cilium organization	1.52	0.00155348	A0A5G2QQD3	242	K	93.632	0.000827518	Up	Outer dense fiber of sperm tails 2 OS=Sus scrofa OX=9823 GN=ODF2 PE=3 SV=1	ODF2	1	2.70656e-19	262.24	2	K(1)HLQQEK	-0.89588	0.976955	2.0046	1.9831	0.0150557		0.0202929
Biological Process	GO:0044782	7	cilium organization	1.52	0.00155348	A0A5G2QQD3	687	K	5.766	0.00573386	Up	Outer dense fiber of sperm tails 2 OS=Sus scrofa OX=9823 GN=ODF2 PE=3 SV=1	ODF2	1	0.000199061	178.46	3	DWQK(1)GSHELAR	-4.3314	1.75731	2.21047		0.476861	0.290002	0.26535
Biological Process	GO:0044782	7	cilium organization	1.52	0.00155348	A0A5G2QHV4	435	K	6.85	0.00640272	Up	Sperm associated antigen 6 OS=Sus scrofa OX=9823 GN=SPAG6 PE=4 SV=1	SPAG6	1	0.00603121	99.802	2	LFVTSGGLK(1)K	-1.0103	1.17038	1.21713	2.84817	0.371769	0.201043	0.19151
Biological Process	GO:0044782	7	cilium organization	1.52	0.00155348	A0A5G2QQD3	254	K	3.596	0.0457166	Up	Outer dense fiber of sperm tails 2 OS=Sus scrofa OX=9823 GN=ODF2 PE=3 SV=1	ODF2	1	6.17738e-26	259.1	3	HLQQEK(1)ECLMSK(1)LVEAEMDGAAAAK	-0.0522	1.6448	2.01579	1.03384	0.880279	0.186791	0.238499
Biological Process	GO:0044782	7	cilium organization	1.52	0.00155348	A0A5G2QQD3	619	K	7.006	4.60828e-05	Up	Outer dense fiber of sperm tails 2 OS=Sus scrofa OX=9823 GN=ODF2 PE=3 SV=1	ODF2	1	0.000898223	180.18	2	ILK(1)DEMNK	-0.010783	1.62345	1.93116	1.69598	0.290446	0.245573	0.213388
Biological Process	GO:0044782	7	cilium organization	1.52	0.00155348	A0A5G2QQD3	556	K	2.888	0.00661531	Up	Outer dense fiber of sperm tails 2 OS=Sus scrofa OX=9823 GN=ODF2 PE=3 SV=1	ODF2	1	0.00208521	117.67	2	LK(1)ASFAPMEDK	0.75585	1.19342	1.23329	2.03011	0.558436	0.571056	0.413685
Biological Process	GO:0044782	7	cilium organization	1.52	0.00155348	A0A5G2QQD3	358	K	42.867	0.017392	Up	Outer dense fiber of sperm tails 2 OS=Sus scrofa OX=9823 GN=ODF2 PE=3 SV=1	ODF2	1	7.90589e-23	231.89	2	LLLLLQDK(1)DK	0.60428	1.27351	2.63531			0.0607322	0.0304517
Biological Process	GO:0044782	7	cilium organization	1.52	0.00155348	A0A5G2QQD3	339	K	23.116	0.00200366	Up	Outer dense fiber of sperm tails 2 OS=Sus scrofa OX=9823 GN=ODF2 PE=3 SV=1	ODF2	1	1.81189e-05	168.8	2	LMEQQGALLK(1)R	0.18355	1.1951	1.79217	2.76394	0.146758	0.0403156	0.0617193
Biological Process	GO:0044782	7	cilium organization	1.52	0.00155348	A0A5G2QQD3	297	K	12.021	0.0006451	Up	Outer dense fiber of sperm tails 2 OS=Sus scrofa OX=9823 GN=ODF2 PE=3 SV=1	ODF2	1	6.20789e-06	217.02	2	QK(1)ELLLQK	-0.25407	1.80953	1.53058	2.1991	0.22736	0.099837	0.133592
Biological Process	GO:0044782	7	cilium organization	1.52	0.00155348	A0A5G2QQD3	108	K	69.54	5.6459e-05	Up	Outer dense fiber of sperm tails 2 OS=Sus scrofa OX=9823 GN=ODF2 PE=3 SV=1	ODF2	1	0.00585361	110.88	2	TK(1)VPWMPPGK	0.7451	1.77472	1.83773	2.30249	0.0408053	0.0189012	0.0253516
Biological Process	GO:0044782	7	cilium organization	1.52	0.00155348	A0A5G2QQD3	116	K	44.59	6.4448e-05	Up	Outer dense fiber of sperm tails 2 OS=Sus scrofa OX=9823 GN=ODF2 PE=3 SV=1	ODF2	1	4.22569e-05	150.61	2	VPWMPPGK(1)SSAR	0.08693	1.50645	1.97375	2.3882	0.0595762	0.0333653	0.0386662
Biological Process	GO:0044782	7	cilium organization	1.52	0.00155348	A0A5G2QQD3	86	K	57.689	0.000220107	Up	Outer dense fiber of sperm tails 2 OS=Sus scrofa OX=9823 GN=ODF2 PE=3 SV=1	ODF2	1	1.27219e-21	262.43	3	TPCGAPSVTVTK(1)SHK(1)R	-0.032243	1.35893	1.69412	2.84471	0.0418123	0.0204295	0.0399924
Biological Process	GO:0044782	7	cilium organization	1.52	0.00155348	A0A5G2QQD3	106	K	44.385	0.00481902	Up	Outer dense fiber of sperm tails 2 OS=Sus scrofa OX=9823 GN=ODF2 PE=3 SV=1	ODF2	0.999953	0.000214564	143.79	2	VK(1)TKVPWMPPGK	0.0090632	1.89254	2.01932		0.0326699		0.0554654
Biological Process	GO:0044782	7	cilium organization	1.52	0.00155348	A0A5G2QQD3	182	K	73.773	0.000748508	Up	Outer dense fiber of sperm tails 2 OS=Sus scrofa OX=9823 GN=ODF2 PE=3 SV=1	ODF2	1	2.0385e-159	437.41	2	KIDSLMNAVGCLK(1)SEVK	-0.22037	1.57079	1.64752	2.70145	0.0472426	0.0229699	0.0100304
Biological Process	GO:0044782	7	cilium organization	1.52	0.00155348	A0A5G2QHV4	258	K	14.735	0.0123856	Up	Sperm associated antigen 6 OS=Sus scrofa OX=9823 GN=SPAG6 PE=4 SV=1	SPAG6	1	8.3393e-29	206	4	EIAK(1)HTPELSQLIVNAGGVAAVIDCIGSCK	-0.26782	1.02412	1.3687	2.39076	0.16095		0.0554727
Biological Process	GO:0044782	7	cilium organization	1.52	0.00155348	A0A5G2QHV4	241	K	7.032	0.00489301	Up	Sperm associated antigen 6 OS=Sus scrofa OX=9823 GN=SPAG6 PE=4 SV=1	SPAG6	1	0.0178538	119.17	2	DK(1)DEYVK	2.5852	1.21484	1.23394	2.11822	0.245345		0.187651
Biological Process	GO:0044782	7	cilium organization	1.52	0.00155348	A0A5G2QHV4	383	K	13.353	0.00478197	Up	Sperm associated antigen 6 OS=Sus scrofa OX=9823 GN=SPAG6 PE=4 SV=1	SPAG6	1	0.000234419	196.86	2	AIK(1)NILQK	0.051531	1.18769	1.3385	3.05577	0.247093	0.0920181	0.0789303
Biological Process	GO:0044782	7	cilium organization	1.52	0.00155348	A0A287A3S5	419	K	12.806	0.0108239	Up	Tektin OS=Sus scrofa OX=9823 GN=TEKT4 PE=3 SV=1	TEKT4	1	1.51407e-13	244.01	2	DLAVK(1)TNSLFINR	0.09173	1.44813	0.916578	2.38787	0.166523	0.0808966
Biological Process	GO:0044782	7	cilium organization	1.52	0.00155348	A0A287A3S5	218	K	9.461	0.00358398	Up	Tektin OS=Sus scrofa OX=9823 GN=TEKT4 PE=3 SV=1	TEKT4	1	4.44431e-46	282.6	3	ETCEMGWSDK(1)VEAYNIDEACCR	-1.1944	1.23857	1.19597	2.23634	0.158491		0.170628
Biological Process	GO:0044782	7	cilium organization	1.52	0.00155348	A0A287A3S5	317	K	13.716	0.00143311	Up	Tektin OS=Sus scrofa OX=9823 GN=TEKT4 PE=3 SV=1	TEKT4	1	0.000430341	164.71	2	HK(1)LEYHLR	-1.5191	1.39365	1.46817	2.73045	0.206355	0.115789	0.0855747
Biological Process	GO:0044782	7	cilium organization	1.52	0.00155348	A0A287A3S5	191	K	6.292	0.000312484	Up	Tektin OS=Sus scrofa OX=9823 GN=TEKT4 PE=3 SV=1	TEKT4	1	0.00256796	138.54	2	NIQELLK(1)R	0.21348	1.69283	1.60921	1.87512	0.363587	0.225203	0.234053
Biological Process	GO:0044782	7	cilium organization	1.52	0.00155348	A0A287A3S5	114	K	23.948	0.00108972	Up	Tektin OS=Sus scrofa OX=9823 GN=TEKT4 PE=3 SV=1	TEKT4	1	7.33063e-68	336.37	2	VGEHLQDTHCWK(1)SELQR	-0.44875	1.65227	1.18144	2.92579	0.119775	0.0472285	0.073495
Biological Process	GO:0044782	7	cilium organization	1.52	0.00155348	A0A287A4I2	128	K	5.34	0.00205054	Up	Radial spoke head component 1 OS=Sus scrofa OX=9823 GN=RSPH1 PE=4 SV=2	RSPH1	1	0.000161275	146.79	2	FLNK(1)NPVGPGK	0.52202	1.4233	1.6029	2.02743	0.460834	0.256954	0.228574
Biological Process	GO:0044782	7	cilium organization	1.52	0.00155348	A0A287A4I2	135	K	6.629	0.00206297	Up	Radial spoke head component 1 OS=Sus scrofa OX=9823 GN=RSPH1 PE=4 SV=2	RSPH1	1	7.45686e-21	222.06	3	NPVGPGK(1)YVFDIGCEQHGEYR	-0.43577	1.85322	1.26773	2.09254	0.38313	0.222722	0.180661
Biological Process	GO:0044782	7	cilium organization	1.52	0.00155348	A0A287A4I2	38	K	10.558	0.0037319	Up	Radial spoke head component 1 OS=Sus scrofa OX=9823 GN=RSPH1 PE=4 SV=2	RSPH1	1	4.43029e-39	311.71	3	K(1)HGQGTFIYPDGSR	0.39587	1.59499	1.043	2.84287	0.26844	0.127124	0.123578
Biological Process	GO:0044782	7	cilium organization	1.52	0.00155348	A0A287A4I2	35	K	12.396	0.00411583	Up	Radial spoke head component 1 OS=Sus scrofa OX=9823 GN=RSPH1 PE=4 SV=2	RSPH1	1	0.00054582	143.12	2	YIGEYVK(1)NK	0.10335	1.30571	1.32682	2.91957	0.259379	0.103955	0.0845625
Biological Process	GO:0044782	7	cilium organization	1.52	0.00155348	A0A287A4I2	105	K	3.477	0.00839303	Up	Radial spoke head component 1 OS=Sus scrofa OX=9823 GN=RSPH1 PE=4 SV=2	RSPH1	1	7.67174e-32	264.92	3	YVGTWVK(1)GQQEGAAELIHLNHR	0.22136	1.50107	1.11414	2.04448	0.590065	0.44394	0.306301
Biological Process	GO:0044782	7	cilium organization	1.52	0.00155348	A0A287AUN6	211	K	7.175	0.00728864	Up	WD_REPEATS_REGION domain-containing protein OS=Sus scrofa OX=9823 GN=SPAG16 PE=4 SV=2	SPAG16	1	0.0241427	82.452	2	LINDLK(1)GLK	0.18539	1.92039		2.21504	0.429662	0.240148	0.194754
Biological Process	GO:0044782	7	cilium organization	1.52	0.00155348	F1RMH1	480	K	5.173	0.00300815	Up	Cilia and flagella associated protein 100 OS=Sus scrofa OX=9823 GN=CFAP100 PE=4 SV=3	CFAP100	1	0.0167248	58.268	3	VFHFGEYK(1)GDQEDK	-0.54691	2.16364	1.17086	1.69357	0.448759	0.245719	0.277444
Biological Process	GO:0044782	7	cilium organization	1.52	0.00155348	A0A287B5J3	76	K	6.685	0.0207492	Up	Dynein axonemal light chain 1 OS=Sus scrofa OX=9823 GN=DNAL1 PE=4 SV=2	DNAL1	1	0.0224542	103.29	2	GIHVMK(1)K	-0.023259	1.30811	1.29997	1.93853	0.342586		0.110808
Biological Process	GO:0044782	7	cilium organization	1.52	0.00155348	A0A287B9W3	2862	K	12.185	0.0151568	Up	Cytoplasmic dynein 1 heavy chain 1(predicted) OS=Sus scrofa OX=9823 GN=DYNC1H1 PE=1 SV=2	DYNC1H1	1	0.0221965	83.753	2	HFPNIDK(1)EK	0.034155	1.12423	0.939017	2.67739	0.171405	0.0879639
Biological Process	GO:0044782	7	cilium organization	1.52	0.00155348	F1RVJ8	304	K	6.423	0.0189962	Up	Armadillo repeat containing 4 OS=Sus scrofa OX=9823 GN=ODAD2 PE=4 SV=3	ODAD2	1	0.000546996	175.49	2	EK(1)SAVFSENMSK	-0.15641	1.51775	0.688228	2.98573	0.356283	0.229028	0.222982
Biological Process	GO:0044782	7	cilium organization	1.52	0.00155348	F1RVJ8	115	K	15.114	0.00315431	Up	Armadillo repeat containing 4 OS=Sus scrofa OX=9823 GN=ODAD2 PE=4 SV=3	ODAD2	1	0.000290204	164.77	2	LLFIAK(1)NTK	0.63575	1.35757	1.19159	3.0785	0.204272	0.0727326	0.0953359
Biological Process	GO:0044782	7	cilium organization	1.52	0.00155348	F1RVJ8	944	K	14.346	0.0289831	Up	Armadillo repeat containing 4 OS=Sus scrofa OX=9823 GN=ODAD2 PE=4 SV=3	ODAD2	1	3.50162e-13	250.12	2	YLK(1)SSDTNVHR	0.21758		1.36239	2.37696	0.17732		0.08333
Biological Process	GO:0044782	7	cilium organization	1.52	0.00155348	A0A5G2Q9J9	153	K	24.524	0.00175499	Up	Spermatogenesis associated 6 OS=Sus scrofa OX=9823 GN=SPATA6 PE=3 SV=1	SPATA6	1	4.0287e-05	128.95	3	FTYHTAPVEK(1)SHSR	1.6748	1.60234	1.69285	1.57248	0.0404371	0.0918881
Biological Process	GO:0044782	7	cilium organization	1.52	0.00155348	A0A5G2RNC0	221	K	6.576	0.0247743	Up	Dynein regulatory complex subunit 4 OS=Sus scrofa OX=9823 GN=GAS8 PE=3 SV=1	GAS8	1	0.00538113	114.97	2	DK(1)HILLGAK	1.1228	1.01671	1.28508	2.23797	0.330475	0.129767
Biological Process	GO:0044782	7	cilium organization	1.52	0.00155348	A0A5G2RNC0	254	K	3.997	0.0374818	Up	Dynein regulatory complex subunit 4 OS=Sus scrofa OX=9823 GN=GAS8 PE=3 SV=1	GAS8	1	0.0133342	107.29	2	FIK(1)VQQER	0.22981	1.42711	1.1262	1.73194	0.528202	0.186551
Biological Process	GO:0044782	7	cilium organization	1.52	0.00155348	A0A5G2RNC0	20	K	7.507	0.00593474	Up	Dynein regulatory complex subunit 4 OS=Sus scrofa OX=9823 GN=GAS8 PE=3 SV=1	GAS8	1	7.61859e-08	192.24	3	VK(1)HLLYEHQNSLTEMK	0.12312	1.33392	1.05791	2.20036		0.211521	0.196287
Biological Process	GO:0044782	7	cilium organization	1.52	0.00155348	I3L859	320	K	3.071	0.0382213	Up	Coiled-coil domain containing 114 OS=Sus scrofa OX=9823 GN=ODAD1 PE=4 SV=3	ODAD1	1	0.00202155	120.54	2	GQLEALK(1)TAIQR	-0.21186	1.04303	1.15967	1.90557	0.566909	0.324823
Biological Process	GO:0090407	6	organophosphate biosynthetic process	1.41	0.00198558	A0A286ZYX8	334	K	6.791	0.00515911	Up	Fructose-bisphosphate aldolase OS=Sus scrofa OX=9823 GN=ALDOA PE=1 SV=2	ALDOA	1	0.000276715	155.75	2	AAQEEYVK(1)R	-0.10553	1.26678	1.10946	2.85363	0.319463	0.261684	0.188978
Biological Process	GO:0044782	7	cilium organization	1.52	0.00155348	I3L859	136	K	5.867	0.0493244	Up	Coiled-coil domain containing 114 OS=Sus scrofa OX=9823 GN=ODAD1 PE=4 SV=3	ODAD1	1	0.025463	107.67	2	NK(1)ISMLR	-0.43983	1.08623		2.33126	0.317949		0.264565
Biological Process	GO:0044782	7	cilium organization	1.52	0.00155348	D9U8D1	49	K	3.591	0.00079185	Up	Dynein light chain OS=Sus scrofa OX=9823 GN=DYNLL1 PE=1 SV=1	DYNLL1	1	4.66519e-09	234.9	3	K(1)YNPTWHCIVGR	0.378	1.43404	1.64325	1.61594	0.333093	0.528783	0.44489
Biological Process	GO:0044782	7	cilium organization	1.52	0.00155348	F2Z513	27	K	6.696	0.00841924	Up	Cilia-and flagella-associated protein 20 OS=Sus scrofa OX=9823 GN=CFAP20 PE=4 SV=1	CFAP20	1	0.00354423	127.46	2	PLQIWDK(1)K	0.062147	1.45941	1.25897	2.50202	0.45282	0.139306	0.187473
Biological Process	GO:0044782	7	cilium organization	1.52	0.00155348	F2Z513	115	K	7.514	0.0198544	Up	Cilia-and flagella-associated protein 20 OS=Sus scrofa OX=9823 GN=CFAP20 PE=4 SV=1	CFAP20	1	0.00210955	117.53	2	VK(1)PFICTMPMR	-0.49846	1.86634	0.739585	1.98662	0.232067		0.175391
Biological Process	GO:0044782	7	cilium organization	1.52	0.00155348	I3LT05	23	K	15.456	0.000184453	Up	Ropporin-1B isoform X1 OS=Sus scrofa OX=9823 GN=ROPN1 PE=4 SV=2	ROPN1	1	0.00424878	130.64	2	QFTK(1)AAIR	-0.48019	1.32769	2.03493	2.27278	0.147428	0.0962685	0.120903
Biological Process	GO:0044782	7	cilium organization	1.52	0.00155348	I3LLI7	162	K	8.412	0.0429766	Up	Dynein axonemal intermediate chain 2 OS=Sus scrofa OX=9823 GN=DNAI2 PE=4 SV=2	DNAI2	1	0.0283084	94.874	2	DPQEIK(1)R	-1.1293	1.59666		1.97836	0.304803	0.12018
Biological Process	GO:0044782	7	cilium organization	1.52	0.00155348	I3LLI7	493	K	10.866	0.00603886	Up	Dynein axonemal intermediate chain 2 OS=Sus scrofa OX=9823 GN=DNAI2 PE=4 SV=2	DNAI2	1	4.12365e-13	240.1	2	NEK(1)NTASSIFER	-0.87971	1.3568	1.23673	2.11745	0.195219	0.0938039
Biological Process	GO:0044782	7	cilium organization	1.52	0.00155348	I3LN92	88	K	6.971	0.00792638	Up	NME/NM23 family member 5 OS=Sus scrofa OX=9823 GN=NME5 PE=3 SV=1	NME5	1	0.00335934	138.4	2	HK(1)AISYWK	-0.27729	1.23509	1.25389	2.75826	0.408931	0.189947	0.153881
Biological Process	GO:0044782	7	cilium organization	1.52	0.00155348	I3LN92	194	K	12.886	0.00756898	Up	NME/NM23 family member 5 OS=Sus scrofa OX=9823 GN=NME5 PE=3 SV=1	NME5	0.99455	3.07673e-06	116.39	4	QKPADPLIWLADWLLK(0.995)NNPNK(0.005)PK	-0.372	0.987814	1.3657	2.40053	0.155627		0.090329
Biological Process	GO:0090407	6	organophosphate biosynthetic process	1.41	0.00198558	A0A5G2QU76	278	K	39.045	0.000389293	Up	Solute carrier family 25 member 13 OS=Sus scrofa OX=9823 GN=SLC25A13 PE=1 SV=1	SLC25A13	1	0.0111873	105.14	2	NSFDCFK(1)K	0.49831	1.44111	1.50402	1.97093		0.0328802	0.0510576
Biological Process	GO:0090407	6	organophosphate biosynthetic process	1.41	0.00198558	I3L8T2	286	K	39.045	0.000389293	Up	Solute carrier family 25 member 12 OS=Sus scrofa OX=9823 GN=SLC25A12 PE=1 SV=2	SLC25A12	1	0.0111873	105.14	2	NSFDCFK(1)K	0.49831	1.44111	1.50402	1.97093		0.0328802	0.0510576
Biological Process	GO:0044782	7	cilium organization	1.52	0.00155348	F1SV60	423	K	8.412	0.000175265	Up	Tektin OS=Sus scrofa OX=9823 GN=TEKT2 PE=3 SV=1	TEKT2	1	3.12071e-05	166.66	2	TLSPLK(1)TCQLELT	-0.14157	1.47332	1.76318	2.12604	0.26141	0.175097	0.200946
Biological Process	GO:0090407	6	organophosphate biosynthetic process	1.41	0.00198558	A0A286ZQ79	157	K	2.629	0.0434756	Up	Adenylate kinase isoenzyme 1 OS=Sus scrofa OX=9823 GN=AK1 PE=3 SV=2	AK1	1	0.00042238	135.55	2	DAMVAK(1)VDTSK	-0.13521	1.31059	1.1152	1.92081	0.911542	0.434503	0.307352
Biological Process	GO:0090407	6	organophosphate biosynthetic process	1.41	0.00198558	A0A286ZQ79	83	K	3.356	0.00718373	Up	Adenylate kinase isoenzyme 1 OS=Sus scrofa OX=9823 GN=AK1 PE=3 SV=2	AK1	1	5.39117e-06	201	2	SK(1)IIFVVGGPGSGK	-0.43181	1.25426	1.2372	2.13102	0.58868	0.342975	0.445864
Biological Process	GO:0090407	6	organophosphate biosynthetic process	1.41	0.00198558	A0A286ZX04	118	K	3.844	0.0120218	Up	ATP synthase subunit s, mitochondrial OS=Sus scrofa OX=9823 GN=DMAC2L PE=1 SV=1	DMAC2L	1	2.52744e-05	139.42	3	FCK(1)CHYIEDYCLER	-0.82746	1.11346	2.2252	1.4226	0.524335	0.468113	0.2463
Biological Process	GO:0090407	6	organophosphate biosynthetic process	1.41	0.00198558	A0A5G2RC13	175	K	9.334	0.000674368	Up	Stomatin like 2 OS=Sus scrofa OX=9823 GN=STOML2 PE=1 SV=1	STOML2	1	0.000436852	132.32	2	ESAINVAEGK(1)K	1.0999	1.36438	2.53313	1.52188	0.216881	0.217543	0.146186
Biological Process	GO:0090407	6	organophosphate biosynthetic process	1.41	0.00198558	A0A287BF92	236	K	11.889	0.0300394	Up	Phospholipase A2 group VI OS=Sus scrofa OX=9823 GN=PLA2G6 PE=4 SV=2	PLA2G6	1	0.000130946	113.47	3	YGASPLHWAK(1)NAEMAR	0.060125	0.922931	0.728278	3.0833	0.147061		0.118426
Biological Process	GO:0090407	6	organophosphate biosynthetic process	1.41	0.00198558	P33198	244	K	16.832	0.0140722	Up	Isocitrate dehydrogenase [NADP], mitochondrial (Fragment) OS=Sus scrofa OX=9823 GN=IDH2 PE=1 SV=1	IDH2	1	0.000874885	182.29	2	HYK(1)TDFDK	-0.066924	1.41234	1.54003	1.85714	0.158154	0.0323341
Biological Process	GO:0090407	6	organophosphate biosynthetic process	1.41	0.00198558	P33198	124	K	13.745	0.00460705	Up	Isocitrate dehydrogenase [NADP], mitochondrial (Fragment) OS=Sus scrofa OX=9823 GN=IDH2 PE=1 SV=1	IDH2	1	0.00112299	125.53	2	EPIICK(1)NIPR	-0.15798	1.69368	1.62279	2.27661	0.278081	0.0683296	0.0605082
Biological Process	GO:0090407	6	organophosphate biosynthetic process	1.41	0.00198558	P33198	212	K	12.082	0.000725591	Up	Isocitrate dehydrogenase [NADP], mitochondrial (Fragment) OS=Sus scrofa OX=9823 GN=IDH2 PE=1 SV=1	IDH2	1	0.0187401	82.287	2	K(1)WPLYMSTK	0.51555	1.94529	1.50016	2.09589	0.198715	0.0878225	0.172125
Biological Process	GO:0090407	6	organophosphate biosynthetic process	1.41	0.00198558	P33198	268	K	39.981	0.00151274	Up	Isocitrate dehydrogenase [NADP], mitochondrial (Fragment) OS=Sus scrofa OX=9823 GN=IDH2 PE=1 SV=1	IDH2	1	3.25207e-16	189.86	2	LIDDMVAQVLK(1)SSGGFVWACK	0.94173	1.85072	2.12604	1.87683	0.102256	0.0210623	0.0230925
Biological Process	GO:0090407	6	organophosphate biosynthetic process	1.41	0.00198558	P33198	251	K	14.552	0.00308018	Up	Isocitrate dehydrogenase [NADP], mitochondrial (Fragment) OS=Sus scrofa OX=9823 GN=IDH2 PE=1 SV=1	IDH2	1	0.00102623	168.23	2	YK(1)IWYEHR	0.95171	1.63389	1.6516	2.3287	0.239214	0.0916456	0.0549487
Biological Process	GO:0090407	6	organophosphate biosynthetic process	1.41	0.00198558	A0A286ZQ79	95	K	5.433	0.0175511	Up	Adenylate kinase isoenzyme 1 OS=Sus scrofa OX=9823 GN=AK1 PE=3 SV=2	AK1	1	2.56042e-07	155.8	2	IIFVVGGPGSGK(1)GTQCEK	0.2788	1.22451	1.03596	2.19304		0.204348	0.342141
Biological Process	GO:0044782	7	cilium organization	1.52	0.00155348	F1SV60	368	K	6.153	0.000776976	Up	Tektin OS=Sus scrofa OX=9823 GN=TEKT2 PE=3 SV=1	TEKT2	1	7.07533e-15	233.59	2	LAQAQDALDALYK(1)HLAR	-0.68831	1.75982	1.32782	2.07355	0.360263	0.215523	0.263026
Biological Process	GO:0044782	7	cilium organization	1.52	0.00155348	F1SV60	148	K	3.91	0.0323209	Up	Tektin OS=Sus scrofa OX=9823 GN=TEKT2 PE=3 SV=1	TEKT2	1	0.00794729	93.649	2	EVEVIEATK(1)K	0.4182	1.49199	1.05245	1.72723	0.515151		0.213187
Biological Process	GO:0044782	7	cilium organization	1.52	0.00155348	F1SUR7	21	K	8.745	0.0181538	Up	DnaJ homolog subfamily B member 13 OS=Sus scrofa OX=9823 GN=DNAJB13 PE=4 SV=1	DNAJB13	1	1.68635e-63	352.5	2	NSEDAQIK(1)NAYR	0.095786	1.54959	1.16996	1.92628	0.273942		0.0802215
Biological Process	GO:0044782	7	cilium organization	1.52	0.00155348	D9U8D1	9	K	24.408	0.00694407	Up	Dynein light chain OS=Sus scrofa OX=9823 GN=DYNLL1 PE=1 SV=1	DYNLL1	1	1.84054e-39	275.2	3	AVIK(1)NADMSEEMQQDSVECATQALEK	-0.66159	1.21488	0.916273	2.73591	0.084108	0.0488266
Biological Process	GO:0044782	7	cilium organization	1.52	0.00155348	D9U8D1	43	K	5.345	0.00818309	Up	Dynein light chain OS=Sus scrofa OX=9823 GN=DYNLL1 PE=1 SV=1	DYNLL1	1	0.0101084	107.66	2	DIAAHIK(1)K	0.63195	1.61044	0.872354	2.57155	0.260128	0.34158	0.343941
Biological Process	GO:0044782	7	cilium organization	1.52	0.00155348	F1RGN9	21	K	14.005	0.0024957	Up	Tektin OS=Sus scrofa OX=9823 GN=TEKT1 PE=3 SV=3	TEKT1	1	1.13348e-07	184.21	4	FLPSEWHIANK(1)NHYHR	3.0697	1.30858	1.16773	3.12381	0.17672	0.139838	0.0833142
Biological Process	GO:0044782	7	cilium organization	1.52	0.00155348	F1RL08	217	K	17.03	0.000614138	Up	Tektin OS=Sus scrofa OX=9823 GN=TEKT5 PE=3 SV=2	TEKT5	1	3.30367e-08	203.85	2	IGIDLVHDNVEK(1)NLIR	-0.1456	1.87348	1.88001	1.91374	0.18035	0.0861082	0.0663156
Biological Process	GO:0044782	7	cilium organization	1.52	0.00155348	F1RL08	178	K	12.01	0.00352015	Up	Tektin OS=Sus scrofa OX=9823 GN=TEKT5 PE=3 SV=2	TEKT5	1	4.10555e-38	300.98	2	LLNENHSLDSIK(1)R	-0.34729	1.29955	1.55179	2.68748	0.268616	0.10978	0.0827727
Biological Process	GO:0044782	7	cilium organization	1.52	0.00155348	F1RL08	131	K	18.975	0.000813372	Up	Tektin OS=Sus scrofa OX=9823 GN=TEKT5 PE=3 SV=2	TEKT5	1	0.000231685	185.6	2	LMQDK(1)DQLTR	-0.49052	1.33961	1.24701	3.11299	0.11414	0.0789179	0.107325
Biological Process	GO:0044782	7	cilium organization	1.52	0.00155348	F1RL08	360	K	7.259	0.00732163	Up	Tektin OS=Sus scrofa OX=9823 GN=TEKT5 PE=3 SV=2	TEKT5	1	0.00426183	118.32	2	NK(1)LQTQLAK	-0.025812	1.77105		2.3727	0.40876	0.18832	0.259169
Biological Process	GO:0044782	7	cilium organization	1.52	0.00155348	F1RL08	270	K	8.594	0.000464421	Up	Tektin OS=Sus scrofa OX=9823 GN=TEKT5 PE=3 SV=2	TEKT5	1	3.32361e-50	322.99	2	NSAEFIDEK(1)CLNMR	-1.3461	1.65122	2.11514	1.60824	0.284189	0.148731	0.192469
Biological Process	GO:0044782	7	cilium organization	1.52	0.00155348	F1RL08	358	K	7.145	0.00163302	Up	Tektin OS=Sus scrofa OX=9823 GN=TEKT5 PE=3 SV=2	TEKT5	1	0.000775515	131.5	2	VAEVTDIK(1)NK	-0.022901	1.84665	1.53205	1.88468	0.356771	0.14522	0.234628
Biological Process	GO:0044782	7	cilium organization	1.52	0.00155348	F1RRH7	183	K	6.593	0.0161645	Up	Radial spoke head component 9 OS=Sus scrofa OX=9823 GN=RSPH9 PE=4 SV=1	RSPH9	1	0.00591067	80.219	3	K(1)LSSYFHFR	-0.59268	2.04257	1.43065			0.306349	0.220429
Biological Process	GO:0044782	7	cilium organization	1.52	0.00155348	F1RZ80	479	K	5.708	0.0112579	Up	Coiled-coil domain containing 40 OS=Sus scrofa OX=9823 GN=CCDC40 PE=4 SV=3	CCDC40	1	0.00197711	103.69	2	EK(1)TNLVTHLSK	0.033761	1.18589	1.13165	2.78807	0.460059	0.224469	0.209868
Biological Process	GO:0044782	7	cilium organization	1.52	0.00155348	F1S4S3	20	K	5.751	0.00749399	Up	2-phospho-D-glycerate hydro-lyase OS=Sus scrofa OX=9823 GN=ENO4 PE=3 SV=4	ENO4	1	6.80195e-05	177.7	2	LK(1)QQALEYYR	-0.02886	1.56715	1.0337	2.51044	0.447789	0.216263	0.224661
Biological Process	GO:0044782	7	cilium organization	1.52	0.00155348	F1S598	62	K	12.497	0.0140818	Up	Coiled-coil domain containing 151 OS=Sus scrofa OX=9823 GN=ODAD3 PE=4 SV=4	ODAD3	1	4.16276e-32	270.95	3	AGPFHASEGK(1)STVHTQVAELQR	0.38218	1.20189	0.907229	2.63765	0.166442		0.0867836
Biological Process	GO:0044782	7	cilium organization	1.52	0.00155348	F1SAE4	266	K	9.925	0.00365451	Up	NME/NM23 family member 8 OS=Sus scrofa OX=9823 GN=NME8 PE=4 SV=4	NME8	1	1.49684e-27	280.55	2	HK(1)QDSLQEYMR	-1.6474	1.23207	1.65381	1.79942	0.206044		0.108654
Biological Process	GO:0044782	7	cilium organization	1.52	0.00155348	F1SAE4	99	K	4.822	0.0290064	Up	NME/NM23 family member 8 OS=Sus scrofa OX=9823 GN=NME8 PE=4 SV=4	NME8	1	0.000393236	138.26	2	IK(1)GANAPLVNQK	-0.54016	1.33893	1.08117	1.97261	0.43674		0.170543
Biological Process	GO:0044782	7	cilium organization	1.52	0.00155348	F1SAQ8	182	K	9.291	0.00236575	Up	Nucleoside-diphosphate kinase OS=Sus scrofa OX=9823 GN=AK7 PE=4 SV=3	AK7	1	4.96123e-06	180.27	3	K(1)HHPNFLDHINAEK	0.26996	1.99572	1.61558		0.199017		0.18968
Biological Process	GO:0044782	7	cilium organization	1.52	0.00155348	F1SDE8	261	K	2.24	0.0045704	Up	Tektin OS=Sus scrofa OX=9823 GN=TEKT3 PE=3 SV=2	TEKT3	1	0.00468186	109.21	2	DLSDK(1)QAAYR	-0.61587	1.41304	1.67492	1.05998	0.655688	0.583917	0.612457
Biological Process	GO:0044782	7	cilium organization	1.52	0.00155348	F1SDE8	57	K	14.24	0.000171441	Up	Tektin OS=Sus scrofa OX=9823 GN=TEKT3 PE=3 SV=2	TEKT3	1	2.45032e-21	145.43	3	PSTYYK(1)AASNWPALDPYCTR	0.25709	1.63762	1.70604	2.26264	0.17732	0.10149	0.114881
Biological Process	GO:0044782	7	cilium organization	1.52	0.00155348	F1SDE8	360	K	8.504	0.021205	Up	Tektin OS=Sus scrofa OX=9823 GN=TEKT3 PE=3 SV=2	TEKT3	1	0.00170209	129.56	2	NK(1)MQIHLAK	0.41011	0.946739	1.02788	2.66191	0.222667	0.140806
Biological Process	GO:0044782	7	cilium organization	1.52	0.00155348	F1SPN2	208	K	6.316	0.0374656	Up	Coiled-coil domain containing 65 OS=Sus scrofa OX=9823 GN=CCDC65 PE=4 SV=3	CCDC65	1	0.00180467	128.36	2	NLEEK(1)HFLR	-0.28046	1.29599	1.02616	2.20049	0.372116	0.105243
Biological Process	GO:0044782	7	cilium organization	1.52	0.00155348	F1SUR7	30	K	11.802	0.00607217	Up	DnaJ homolog subfamily B member 13 OS=Sus scrofa OX=9823 GN=DNAJB13 PE=4 SV=1	DNAJB13	1	0.000392315	152.47	2	LALK(1)NHPLR	-0.20438	1.80141	1.31553	2.41438	0.313762	0.0864943	0.0684123
Biological Process	GO:0044782	7	cilium organization	1.52	0.00155348	F2Z536	43	K	3.702	0.0178742	Up	Dynein light chain OS=Sus scrofa OX=9823 GN=DYNLL2 PE=1 SV=1	DYNLL2	1	0.0220919	88.942	2	DIAAYIK(1)K	-0.21342	1.17901	1.09936	2.44545	0.618355	0.339526	0.318296
Biological Process	GO:0035383	5	thioester metabolic process	1.77	0.00133702	A0A5G2QPK6	124	K	11.949	0.0040856	Up	Dihydrolipoyl dehydrogenase OS=Sus scrofa OX=9823 GN=DLD PE=1 SV=1	DLD	1	1.49524e-09	167.14	3	SNAVK(1)ALTGGIAHLFK(1)QNK	-0.511	2.07125	0.955968	1.70857	0.123067	0.141145
Biological Process	GO:0042407	9	cristae formation	2.09	0.00232596	F1RPS8	216	K	10.857	0.000844146	Up	ATP synthase subunit alpha OS=Sus scrofa OX=9823 GN=ATP5F1A PE=1 SV=3	ATP5F1A	1	3.16164e-20	267.45	2	TSIAIDTIINQK(1)R	0.36045	1.42636	1.75603	2.31158	0.248026	0.143629	0.114375
Biological Process	GO:0042407	9	cristae formation	2.09	0.00232596	F1RPS8	147	K	13.599	0.000386044	Up	ATP synthase subunit alpha OS=Sus scrofa OX=9823 GN=ATP5F1A PE=1 SV=3	ATP5F1A	1	1.42079e-43	303.02	3	VVDALGNAIDGK(1)GPIGSK(1)TR	0.46658	1.44201	1.54333	1.781		0.135972	0.0976911
Biological Process	GO:0070925	6	organelle assembly	1.43	0.00359158	F1SDE8	57	K	14.24	0.000171441	Up	Tektin OS=Sus scrofa OX=9823 GN=TEKT3 PE=3 SV=2	TEKT3	1	2.45032e-21	145.43	3	PSTYYK(1)AASNWPALDPYCTR	0.25709	1.63762	1.70604	2.26264	0.17732	0.10149	0.114881
Biological Process	GO:0070925	6	organelle assembly	1.43	0.00359158	F1SDE8	360	K	8.504	0.021205	Up	Tektin OS=Sus scrofa OX=9823 GN=TEKT3 PE=3 SV=2	TEKT3	1	0.00170209	129.56	2	NK(1)MQIHLAK	0.41011	0.946739	1.02788	2.66191	0.222667	0.140806
Biological Process	GO:0070925	6	organelle assembly	1.43	0.00359158	F1SP87	57	K	5.396	0.00317599	Up	Acrosome formation-associated factor (Fragment)(predicted) OS=Sus scrofa OX=9823 PE=1 SV=4	--	1	1.25043e-11	188.96	2	ENIPANDK(1)TDDYYK	0.26356	1.0858	1.50891	2.4672	0.354295	0.328867	0.25492
Biological Process	GO:0070925	6	organelle assembly	1.43	0.00359158	F1SPN2	208	K	6.316	0.0374656	Up	Coiled-coil domain containing 65 OS=Sus scrofa OX=9823 GN=CCDC65 PE=4 SV=3	CCDC65	1	0.00180467	128.36	2	NLEEK(1)HFLR	-0.28046	1.29599	1.02616	2.20049	0.372116	0.105243
Biological Process	GO:0070925	6	organelle assembly	1.43	0.00359158	F1SUR7	30	K	11.802	0.00607217	Up	DnaJ homolog subfamily B member 13 OS=Sus scrofa OX=9823 GN=DNAJB13 PE=4 SV=1	DNAJB13	1	0.000392315	152.47	2	LALK(1)NHPLR	-0.20438	1.80141	1.31553	2.41438	0.313762	0.0864943	0.0684123
Biological Process	GO:0070925	6	organelle assembly	1.43	0.00359158	F1SUR7	21	K	8.745	0.0181538	Up	DnaJ homolog subfamily B member 13 OS=Sus scrofa OX=9823 GN=DNAJB13 PE=4 SV=1	DNAJB13	1	1.68635e-63	352.5	2	NSEDAQIK(1)NAYR	0.095786	1.54959	1.16996	1.92628	0.273942		0.0802215
Biological Process	GO:0070925	6	organelle assembly	1.43	0.00359158	F1SV60	148	K	3.91	0.0323209	Up	Tektin OS=Sus scrofa OX=9823 GN=TEKT2 PE=3 SV=1	TEKT2	1	0.00794729	93.649	2	EVEVIEATK(1)K	0.4182	1.49199	1.05245	1.72723	0.515151		0.213187
Biological Process	GO:0070925	6	organelle assembly	1.43	0.00359158	F1SV60	368	K	6.153	0.000776976	Up	Tektin OS=Sus scrofa OX=9823 GN=TEKT2 PE=3 SV=1	TEKT2	1	7.07533e-15	233.59	2	LAQAQDALDALYK(1)HLAR	-0.68831	1.75982	1.32782	2.07355	0.360263	0.215523	0.263026
Biological Process	GO:0070925	6	organelle assembly	1.43	0.00359158	F1SV60	423	K	8.412	0.000175265	Up	Tektin OS=Sus scrofa OX=9823 GN=TEKT2 PE=3 SV=1	TEKT2	1	3.12071e-05	166.66	2	TLSPLK(1)TCQLELT	-0.14157	1.47332	1.76318	2.12604	0.26141	0.175097	0.200946
Biological Process	GO:0070925	6	organelle assembly	1.43	0.00359158	F1SDE8	261	K	2.24	0.0045704	Up	Tektin OS=Sus scrofa OX=9823 GN=TEKT3 PE=3 SV=2	TEKT3	1	0.00468186	109.21	2	DLSDK(1)QAAYR	-0.61587	1.41304	1.67492	1.05998	0.655688	0.583917	0.612457
Biological Process	GO:0070925	6	organelle assembly	1.43	0.00359158	F2Z513	27	K	6.696	0.00841924	Up	Cilia-and flagella-associated protein 20 OS=Sus scrofa OX=9823 GN=CFAP20 PE=4 SV=1	CFAP20	1	0.00354423	127.46	2	PLQIWDK(1)K	0.062147	1.45941	1.25897	2.50202	0.45282	0.139306	0.187473
Biological Process	GO:0070925	6	organelle assembly	1.43	0.00359158	I3LLI7	162	K	8.412	0.0429766	Up	Dynein axonemal intermediate chain 2 OS=Sus scrofa OX=9823 GN=DNAI2 PE=4 SV=2	DNAI2	1	0.0283084	94.874	2	DPQEIK(1)R	-1.1293	1.59666		1.97836	0.304803	0.12018
Biological Process	GO:0070925	6	organelle assembly	1.43	0.00359158	I3LLI7	493	K	10.866	0.00603886	Up	Dynein axonemal intermediate chain 2 OS=Sus scrofa OX=9823 GN=DNAI2 PE=4 SV=2	DNAI2	1	4.12365e-13	240.1	2	NEK(1)NTASSIFER	-0.87971	1.3568	1.23673	2.11745	0.195219	0.0938039
Biological Process	GO:0070925	6	organelle assembly	1.43	0.00359158	I3LN92	88	K	6.971	0.00792638	Up	NME/NM23 family member 5 OS=Sus scrofa OX=9823 GN=NME5 PE=3 SV=1	NME5	1	0.00335934	138.4	2	HK(1)AISYWK	-0.27729	1.23509	1.25389	2.75826	0.408931	0.189947	0.153881
Biological Process	GO:0070925	6	organelle assembly	1.43	0.00359158	I3LN92	194	K	12.886	0.00756898	Up	NME/NM23 family member 5 OS=Sus scrofa OX=9823 GN=NME5 PE=3 SV=1	NME5	0.99455	3.07673e-06	116.39	4	QKPADPLIWLADWLLK(0.995)NNPNK(0.005)PK	-0.372	0.987814	1.3657	2.40053	0.155627		0.090329
Biological Process	GO:0022607	5	cellular component assembly	1.21	0.00365843	A0A286ZUP1	70	K	4.021	0.021402	Up	Complement component 1 Q subcomponent-binding protein, mitochondrial OS=Sus scrofa OX=9823 GN=C1QBP PE=3 SV=1	C1QBP	1	1.40198e-09	232.14	2	AFVEFLNDEIK(1)EEK	-0.058356	1.52511	2.08628	1.19368	0.593344	0.17151	0.430082
Biological Process	GO:0022607	5	cellular component assembly	1.21	0.00365843	A0A286ZUP1	73	K	11.393	0.0226966	Up	Complement component 1 Q subcomponent-binding protein, mitochondrial OS=Sus scrofa OX=9823 GN=C1QBP PE=3 SV=1	C1QBP	0.999998	3.6098e-40	314.29	2	AFVEFLNDEIKEEK(1)K	-0.7902		1.79907	2.61923	0.384649	0.108877	0.0881697
Biological Process	GO:0022607	5	cellular component assembly	1.21	0.00365843	F1SIK9	155	K	7.029	0.00510714	Up	Septin OS=Sus scrofa OX=9823 GN=SEPTIN7 PE=1 SV=3	SEPTIN7	1	3.02486e-07	218.49	2	ADTLTPEECQQFK(1)K	0.54717	1.25871	1.0879	2.90614	0.310824	0.192489	0.243937
Biological Process	GO:0022607	5	cellular component assembly	1.21	0.00365843	F1SIK9	245	K	4.026	0.00143966	Up	Septin OS=Sus scrofa OX=9823 GN=SEPTIN7 PE=1 SV=3	SEPTIN7	1	2.50359e-20	242.16	3	THMQDLK(1)DVTNNVHYENYR	0.054411	1.56067	1.20878	1.52017	0.384607	0.325777
Biological Process	GO:0022607	5	cellular component assembly	1.21	0.00365843	A0A5G2QW89	277	K	21.902	0.000768138	Up	Calcium uniporter protein OS=Sus scrofa OX=9823 GN=MCU PE=1 SV=1	MCU	1	1.19489e-05	208.6	2	DAIAQAEMDLK(1)R	0.34473	1.4506	1.37067	2.03103		0.0590969	0.0885979
Biological Process	GO:0070925	6	organelle assembly	1.43	0.00359158	F2Z513	115	K	7.514	0.0198544	Up	Cilia-and flagella-associated protein 20 OS=Sus scrofa OX=9823 GN=CFAP20 PE=4 SV=1	CFAP20	1	0.00210955	117.53	2	VK(1)PFICTMPMR	-0.49846	1.86634	0.739585	1.98662	0.232067		0.175391
Biological Process	GO:0070925	6	organelle assembly	1.43	0.00359158	F1SAQ8	182	K	9.291	0.00236575	Up	Nucleoside-diphosphate kinase OS=Sus scrofa OX=9823 GN=AK7 PE=4 SV=3	AK7	1	4.96123e-06	180.27	3	K(1)HHPNFLDHINAEK	0.26996	1.99572	1.61558		0.199017		0.18968
Biological Process	GO:0070925	6	organelle assembly	1.43	0.00359158	F1SAE4	99	K	4.822	0.0290064	Up	NME/NM23 family member 8 OS=Sus scrofa OX=9823 GN=NME8 PE=4 SV=4	NME8	1	0.000393236	138.26	2	IK(1)GANAPLVNQK	-0.54016	1.33893	1.08117	1.97261	0.43674		0.170543
Biological Process	GO:0070925	6	organelle assembly	1.43	0.00359158	F1SAE4	266	K	9.925	0.00365451	Up	NME/NM23 family member 8 OS=Sus scrofa OX=9823 GN=NME8 PE=4 SV=4	NME8	1	1.49684e-27	280.55	2	HK(1)QDSLQEYMR	-1.6474	1.23207	1.65381	1.79942	0.206044		0.108654
Biological Process	GO:0070925	6	organelle assembly	1.43	0.00359158	A0A5G2QQD3	86	K	57.689	0.000220107	Up	Outer dense fiber of sperm tails 2 OS=Sus scrofa OX=9823 GN=ODF2 PE=3 SV=1	ODF2	1	1.27219e-21	262.43	3	TPCGAPSVTVTK(1)SHK(1)R	-0.032243	1.35893	1.69412	2.84471	0.0418123	0.0204295	0.0399924
Biological Process	GO:0070925	6	organelle assembly	1.43	0.00359158	A0A5G2QQD3	106	K	44.385	0.00481902	Up	Outer dense fiber of sperm tails 2 OS=Sus scrofa OX=9823 GN=ODF2 PE=3 SV=1	ODF2	0.999953	0.000214564	143.79	2	VK(1)TKVPWMPPGK	0.0090632	1.89254	2.01932		0.0326699		0.0554654
Biological Process	GO:0070925	6	organelle assembly	1.43	0.00359158	F1SMN3	487	K	57.038	0.00154692	Up	Coiled-coil domain containing 136 OS=Sus scrofa OX=9823 GN=CCDC136 PE=1 SV=4	CCDC136	1	0.00142945	154.01	2	AQLQEVK(1)R	-0.48159	1.50572	1.72785	2.66305	0.0537132	0.0398576	0.00980928
Biological Process	GO:0070925	6	organelle assembly	1.43	0.00359158	F1SMN3	408	K	16.519	0.00224379	Up	Coiled-coil domain containing 136 OS=Sus scrofa OX=9823 GN=CCDC136 PE=1 SV=4	CCDC136	1	1.36178e-49	317.31	2	ITK(1)SQVVESQSEK	0.29153	1.39493	1.10455	2.30656	0.0981356		0.0958267
Biological Process	GO:0070925	6	organelle assembly	1.43	0.00359158	I3L859	320	K	3.071	0.0382213	Up	Coiled-coil domain containing 114 OS=Sus scrofa OX=9823 GN=ODAD1 PE=4 SV=3	ODAD1	1	0.00202155	120.54	2	GQLEALK(1)TAIQR	-0.21186	1.04303	1.15967	1.90557	0.566909	0.324823
Biological Process	GO:0070925	6	organelle assembly	1.43	0.00359158	I3L859	136	K	5.867	0.0493244	Up	Coiled-coil domain containing 114 OS=Sus scrofa OX=9823 GN=ODAD1 PE=4 SV=3	ODAD1	1	0.025463	107.67	2	NK(1)ISMLR	-0.43983	1.08623		2.33126	0.317949		0.264565
Biological Process	GO:0070925	6	organelle assembly	1.43	0.00359158	F2Z536	43	K	3.702	0.0178742	Up	Dynein light chain OS=Sus scrofa OX=9823 GN=DYNLL2 PE=1 SV=1	DYNLL2	1	0.0220919	88.942	2	DIAAYIK(1)K	-0.21342	1.17901	1.09936	2.44545	0.618355	0.339526	0.318296
Biological Process	GO:0070925	6	organelle assembly	1.43	0.00359158	D9U8D1	49	K	3.591	0.00079185	Up	Dynein light chain OS=Sus scrofa OX=9823 GN=DYNLL1 PE=1 SV=1	DYNLL1	1	4.66519e-09	234.9	3	K(1)YNPTWHCIVGR	0.378	1.43404	1.64325	1.61594	0.333093	0.528783	0.44489
Biological Process	GO:0070925	6	organelle assembly	1.43	0.00359158	D9U8D1	9	K	24.408	0.00694407	Up	Dynein light chain OS=Sus scrofa OX=9823 GN=DYNLL1 PE=1 SV=1	DYNLL1	1	1.84054e-39	275.2	3	AVIK(1)NADMSEEMQQDSVECATQALEK	-0.66159	1.21488	0.916273	2.73591	0.084108	0.0488266
Biological Process	GO:0070925	6	organelle assembly	1.43	0.00359158	D9U8D1	43	K	5.345	0.00818309	Up	Dynein light chain OS=Sus scrofa OX=9823 GN=DYNLL1 PE=1 SV=1	DYNLL1	1	0.0101084	107.66	2	DIAAHIK(1)K	0.63195	1.61044	0.872354	2.57155	0.260128	0.34158	0.343941
Biological Process	GO:0070925	6	organelle assembly	1.43	0.00359158	D5K8A9	125	K	25.581	0.000750994	Up	Sperm acrosome membrane-associated protein 1 OS=Sus scrofa OX=9823 GN=SPACA1 PE=1 SV=1	SPACA1	1	7.48117e-69	347.6	2	GPVDCGWGK(1)PISENLESVR	-0.45778	1.68379	1.05455	3.03593	0.0971765	0.071138	0.0574145
Biological Process	GO:0070925	6	organelle assembly	1.43	0.00359158	F1RGN9	21	K	14.005	0.0024957	Up	Tektin OS=Sus scrofa OX=9823 GN=TEKT1 PE=3 SV=3	TEKT1	1	1.13348e-07	184.21	4	FLPSEWHIANK(1)NHYHR	3.0697	1.30858	1.16773	3.12381	0.17672	0.139838	0.0833142
Biological Process	GO:0070925	6	organelle assembly	1.43	0.00359158	F1RL08	217	K	17.03	0.000614138	Up	Tektin OS=Sus scrofa OX=9823 GN=TEKT5 PE=3 SV=2	TEKT5	1	3.30367e-08	203.85	2	IGIDLVHDNVEK(1)NLIR	-0.1456	1.87348	1.88001	1.91374	0.18035	0.0861082	0.0663156
Biological Process	GO:0070925	6	organelle assembly	1.43	0.00359158	F1RL08	178	K	12.01	0.00352015	Up	Tektin OS=Sus scrofa OX=9823 GN=TEKT5 PE=3 SV=2	TEKT5	1	4.10555e-38	300.98	2	LLNENHSLDSIK(1)R	-0.34729	1.29955	1.55179	2.68748	0.268616	0.10978	0.0827727
Biological Process	GO:0070925	6	organelle assembly	1.43	0.00359158	F1RL08	131	K	18.975	0.000813372	Up	Tektin OS=Sus scrofa OX=9823 GN=TEKT5 PE=3 SV=2	TEKT5	1	0.000231685	185.6	2	LMQDK(1)DQLTR	-0.49052	1.33961	1.24701	3.11299	0.11414	0.0789179	0.107325
Biological Process	GO:0070925	6	organelle assembly	1.43	0.00359158	F1RL08	360	K	7.259	0.00732163	Up	Tektin OS=Sus scrofa OX=9823 GN=TEKT5 PE=3 SV=2	TEKT5	1	0.00426183	118.32	2	NK(1)LQTQLAK	-0.025812	1.77105		2.3727	0.40876	0.18832	0.259169
Biological Process	GO:0070925	6	organelle assembly	1.43	0.00359158	F1RL08	270	K	8.594	0.000464421	Up	Tektin OS=Sus scrofa OX=9823 GN=TEKT5 PE=3 SV=2	TEKT5	1	3.32361e-50	322.99	2	NSAEFIDEK(1)CLNMR	-1.3461	1.65122	2.11514	1.60824	0.284189	0.148731	0.192469
Biological Process	GO:0070925	6	organelle assembly	1.43	0.00359158	F1RL08	358	K	7.145	0.00163302	Up	Tektin OS=Sus scrofa OX=9823 GN=TEKT5 PE=3 SV=2	TEKT5	1	0.000775515	131.5	2	VAEVTDIK(1)NK	-0.022901	1.84665	1.53205	1.88468	0.356771	0.14522	0.234628
Biological Process	GO:0070925	6	organelle assembly	1.43	0.00359158	F1RRH7	183	K	6.593	0.0161645	Up	Radial spoke head component 9 OS=Sus scrofa OX=9823 GN=RSPH9 PE=4 SV=1	RSPH9	1	0.00591067	80.219	3	K(1)LSSYFHFR	-0.59268	2.04257	1.43065			0.306349	0.220429
Biological Process	GO:0070925	6	organelle assembly	1.43	0.00359158	F1RZ80	479	K	5.708	0.0112579	Up	Coiled-coil domain containing 40 OS=Sus scrofa OX=9823 GN=CCDC40 PE=4 SV=3	CCDC40	1	0.00197711	103.69	2	EK(1)TNLVTHLSK	0.033761	1.18589	1.13165	2.78807	0.460059	0.224469	0.209868
Biological Process	GO:0070925	6	organelle assembly	1.43	0.00359158	F1S598	62	K	12.497	0.0140818	Up	Coiled-coil domain containing 151 OS=Sus scrofa OX=9823 GN=ODAD3 PE=4 SV=4	ODAD3	1	4.16276e-32	270.95	3	AGPFHASEGK(1)STVHTQVAELQR	0.38218	1.20189	0.907229	2.63765	0.166442		0.0867836
Biological Process	GO:0022607	5	cellular component assembly	1.21	0.00365843	A0A5G2QJQ9	165	K	25.265	0.00102013	Up	Clathrin light chain OS=Sus scrofa OX=9823 GN=CLTA PE=3 SV=1	CLTA	1	0.000680699	133.13	2	LCDFNPK(1)SSK	0.28728	1.6496	1.77057	2.35138	0.13907	0.045033	0.0443408
Biological Process	GO:0070925	6	organelle assembly	1.43	0.00359158	A0A5G2QQD3	116	K	44.59	6.4448e-05	Up	Outer dense fiber of sperm tails 2 OS=Sus scrofa OX=9823 GN=ODF2 PE=3 SV=1	ODF2	1	4.22569e-05	150.61	2	VPWMPPGK(1)SSAR	0.08693	1.50645	1.97375	2.3882	0.0595762	0.0333653	0.0386662
Biological Process	GO:0022607	5	cellular component assembly	1.21	0.00365843	A0A286ZP34	236	K	24.804	0.00101474	Up	HYDIN axonemal central pair apparatus protein OS=Sus scrofa OX=9823 GN=HYDIN PE=4 SV=2	HYDIN	1	0.0172191	57.019	3	DAVFHIK(1)THR	-0.88736	1.55066	1.41433	2.8025	0.119386	0.0403538	0.0727785
Biological Process	GO:0022607	5	cellular component assembly	1.21	0.00365843	F1SM98	68	K	11.529	0.0011361	Up	NADH dehydrogenase [ubiquinone] flavoprotein 2, mitochondrial OS=Sus scrofa OX=9823 GN=NDUFV2 PE=1 SV=2	NDUFV2	1	6.07472e-06	187.31	3	RIEAIVK(1)NYPEGHK	0.20638	2.14107	1.2662	2.11384	0.242565	0.111799	0.124522
Biological Process	GO:0022607	5	cellular component assembly	1.21	0.00365843	A0A286ZWH7	444	K	14.769	3.26689e-05	Up	A-kinase anchoring protein 4 OS=Sus scrofa OX=9823 GN=AKAP4 PE=3 SV=2	AKAP4	1	1.83518e-05	207.29	3	LVSALLGEK(1)R	-0.32893	1.62458	1.70227	2.29266	0.144376	0.112371	0.123736
Biological Process	GO:0022607	5	cellular component assembly	1.21	0.00365843	A0A286ZWH7	527	K	12.12	0.0178974	Up	A-kinase anchoring protein 4 OS=Sus scrofa OX=9823 GN=AKAP4 PE=3 SV=2	AKAP4	1	0.000104946	143.03	2	MASK(1)PCISNK	0.64829	1.2612		2.43393		0.14622	0.15865
Biological Process	GO:0022607	5	cellular component assembly	1.21	0.00365843	A0A286ZWH7	533	K	154.429	0.00200602	Up	A-kinase anchoring protein 4 OS=Sus scrofa OX=9823 GN=AKAP4 PE=3 SV=2	AKAP4	1	2.72774e-06	212.39	2	PCISNK(1)EEK	-0.89916	1.25448	0.842468	2.88156	0.0090902		0.0124019
Biological Process	GO:0022607	5	cellular component assembly	1.21	0.00365843	A0A286ZWH7	489	K	26.717	0.00150584	Up	A-kinase anchoring protein 4 OS=Sus scrofa OX=9823 GN=AKAP4 PE=3 SV=2	AKAP4	1	4.31139e-06	215.34	2	MK(1)PEECK(1)PLTSAEK	-1.0084	1.52955	0.883659	3.37031	0.0650811	0.0609341	0.0904571
Biological Process	GO:0022607	5	cellular component assembly	1.21	0.00365843	A0A286ZWH7	434	K	3.304	0.00635604	Up	A-kinase anchoring protein 4 OS=Sus scrofa OX=9823 GN=AKAP4 PE=3 SV=2	AKAP4	1	3.1256e-20	267.57	2	QNAADIMEAMLK(1)R	-0.041413	1.59191	1.47868			0.423629	0.505779
Biological Process	GO:0022607	5	cellular component assembly	1.21	0.00365843	A0A286ZWH7	374	K	8.493	0.00571529	Up	A-kinase anchoring protein 4 OS=Sus scrofa OX=9823 GN=AKAP4 PE=3 SV=2	AKAP4	1	3.31554e-30	291.57	3	VHSSGK(1)PIPACMVLK(1)R	0.82975	1.14327	1.08706	3.13765	0.172836	0.180637	0.278544
Biological Process	GO:0022607	5	cellular component assembly	1.21	0.00365843	A0A286ZWH7	98	K	36.44	0.000778339	Up	A-kinase anchoring protein 4 OS=Sus scrofa OX=9823 GN=AKAP4 PE=3 SV=2	AKAP4	1	5.70431e-39	311.76	2	QDQSK(1)TEGSVCLFK	-1.0167	1.56904	1.30211	2.96859	0.0768466	0.0274697	0.0559411
Biological Process	GO:0022607	5	cellular component assembly	1.21	0.00365843	A0A286ZWH7	379	K	19.577	0.000162516	Up	A-kinase anchoring protein 4 OS=Sus scrofa OX=9823 GN=AKAP4 PE=3 SV=2	AKAP4	1	1.42086e-11	187.06	2	VLLK(1)HTK	0.18847	1.85556	1.34935	2.50351	0.118482	0.0781199	0.0949862
Biological Process	GO:0022607	5	cellular component assembly	1.21	0.00365843	A0A286ZWH7	365	K	7.696	0.00903594	Up	A-kinase anchoring protein 4 OS=Sus scrofa OX=9823 GN=AKAP4 PE=3 SV=2	AKAP4	1	2.27248e-06	146.79	3	VHSSGK(1)PIPACMVLK(1)R	0.82975	1.39864	0.979601	2.93179	0.142211	0.187541	0.360218
Biological Process	GO:0022607	5	cellular component assembly	1.21	0.00365843	A0A286ZWH7	661	K	61.324	0.000144923	Up	A-kinase anchoring protein 4 OS=Sus scrofa OX=9823 GN=AKAP4 PE=3 SV=2	AKAP4	1	8.47928e-184	453.47	3	LLGESPFHCEDLCEGENK(1)R	0.35807	1.15329	1.8429	2.90755	0.0390561	0.0278876	0.0293276
Biological Process	GO:0022607	5	cellular component assembly	1.21	0.00365843	A0A286ZWH7	508	K	8.899	0.00288638	Up	A-kinase anchoring protein 4 OS=Sus scrofa OX=9823 GN=AKAP4 PE=3 SV=2	AKAP4	1	1.24709e-11	234.04	3	VGEHILK(1)ESLTMWNQK	-0.48529	1.29837	1.49654	2.59896	0.136651	0.151059	0.318427
Biological Process	GO:0022607	5	cellular component assembly	1.21	0.00365843	A0A286ZWT0	318	K	3.153	0.0215633	Up	AP complex subunit beta OS=Sus scrofa OX=9823 GN=AP1B1 PE=1 SV=1	AP1B1	1	0.00163052	123.62	2	RPEILK(1)HEMK	0.36295	1.04303	1.35331	1.73097	0.540579		0.332121
Biological Process	GO:0022607	5	cellular component assembly	1.21	0.00365843	A0A5G2RE71	304	K	4.851	0.00133816	Up	Actin related protein 2 OS=Sus scrofa OX=9823 GN=ACTR2 PE=1 SV=1	ACTR2	1	6.61194e-18	199.89	3	SEFYK(1)HIVLSGGSTMYPGLPSR	-0.38191	1.56038	1.1821	1.65338	0.305638		0.298503
Biological Process	GO:0022607	5	cellular component assembly	1.21	0.00365843	A0A286ZYP6	119	K	18.05	0.00364923	Up	HscB mitochondrial iron-sulfur cluster cochaperone OS=Sus scrofa OX=9823 GN=HSCB PE=4 SV=2	HSCB	1	1.642e-65	351.52	3	DFSEK(1)HSTLVNDAYK	0.5582	1.67533	1.54864	1.59793	0.129031	0.049064
Biological Process	GO:0022607	5	cellular component assembly	1.21	0.00365843	A0A286ZYX8	334	K	6.791	0.00515911	Up	Fructose-bisphosphate aldolase OS=Sus scrofa OX=9823 GN=ALDOA PE=1 SV=2	ALDOA	1	0.000276715	155.75	2	AAQEEYVK(1)R	-0.10553	1.26678	1.10946	2.85363	0.319463	0.261684	0.188978
Biological Process	GO:0022607	5	cellular component assembly	1.21	0.00365843	A0A286ZYX8	346	K	13.397	8.81668e-05	Up	Fructose-bisphosphate aldolase OS=Sus scrofa OX=9823 GN=ALDOA PE=1 SV=2	ALDOA	1	1.8246e-68	350.18	2	ALANSLACQGK(1)YTPSGK	-0.050506	1.53952	1.70934	2.33438	0.143585	0.159933	0.113241
Biological Process	GO:0022607	5	cellular component assembly	1.21	0.00365843	A0A286ZYX8	234	K	2.381	0.0415831	Up	Fructose-bisphosphate aldolase OS=Sus scrofa OX=9823 GN=ALDOA PE=1 SV=2	ALDOA	1	2.95095e-13	158.67	3	ALSDHHIYLEGTLLK(1)PNMVTPGHACTQK	-0.01806	1.89148	0.891527	1.44233	0.394682	0.708463	0.671513
Biological Process	GO:0022607	5	cellular component assembly	1.21	0.00365843	F1SBB1	15	K	7.95	0.0109625	Up	Calcium binding tyrosine phosphorylation regulated OS=Sus scrofa OX=9823 GN=CABYR PE=1 SV=3	CABYR	1	3.11396e-05	138.89	2	LVIPYGLK(1)TLLEGVSR	0.48115	1.20776	0.832072	3.28982	0.180939	0.22065	0.268767
Biological Process	GO:0022607	5	cellular component assembly	1.21	0.00365843	F1SBB1	98	K	4.451	0.000963192	Up	Calcium binding tyrosine phosphorylation regulated OS=Sus scrofa OX=9823 GN=CABYR PE=1 SV=3	CABYR	1	1.92403e-09	238.32	2	TPVVSQEPK(1)R	0.78669	1.41827	1.419	2.06203	0.341942	0.453563	0.305197
Biological Process	GO:0022607	5	cellular component assembly	1.21	0.00365843	A0A5G2QGK1	297	K	5.298	0.00560968	Up	Tubulin beta chain OS=Sus scrofa OX=9823 GN=TUBB4B PE=1 SV=1	TUBB4B	1	1.3308e-38	276.63	3	ALTVPELTQQMFDAK(1)NMMAACDPR	3.4661	1.58078	1.13678	2.32981	0.436533	0.198463	0.317634
Biological Process	GO:0022607	5	cellular component assembly	1.21	0.00365843	A0A286ZWH7	143	K	22.885	0.00339062	Up	A-kinase anchoring protein 4 OS=Sus scrofa OX=9823 GN=AKAP4 PE=3 SV=2	AKAP4	1	3.89589e-69	351.03	2	YALGFQHALSPSASSCK(1)HK	0.03494	1.4111	1.80191	1.64546		0.0383301	0.103206
Biological Process	GO:0022607	5	cellular component assembly	1.21	0.00365843	A0A286ZWH7	189	K	12.126	0.00793092	Up	A-kinase anchoring protein 4 OS=Sus scrofa OX=9823 GN=AKAP4 PE=3 SV=2	AKAP4	1	2.45295e-05	113.63	3	LEMTASK(1)NTNNNQSPSTPPAK	-0.073316	1.42267	1.24291	2.07385	0.0724343		0.188138
Biological Process	GO:0022607	5	cellular component assembly	1.21	0.00365843	A0A286ZWH7	251	K	2.753	0.00153908	Up	A-kinase anchoring protein 4 OS=Sus scrofa OX=9823 GN=AKAP4 PE=3 SV=2	AKAP4	1	3.5157e-07	130	3	LEGGSK(1)CLHHSIYPPSGDK	2.4963	1.14511	1.47079	1.78552	0.516422	0.535683	0.546479
Biological Process	GO:0022607	5	cellular component assembly	1.21	0.00365843	A0A286ZWH7	720	K	11.118	0.00184411	Up	A-kinase anchoring protein 4 OS=Sus scrofa OX=9823 GN=AKAP4 PE=3 SV=2	AKAP4	1	2.16906e-13	249.03	2	LCLIMAK(1)YSNNR	0.1232	1.84186	1.35942	1.51587	0.104054		0.178791
Biological Process	GO:0022607	5	cellular component assembly	1.21	0.00365843	F1SM98	75	K	2.801	0.0175479	Up	NADH dehydrogenase [ubiquinone] flavoprotein 2, mitochondrial OS=Sus scrofa OX=9823 GN=NDUFV2 PE=1 SV=2	NDUFV2	1	0.000534222	85.932	3	NYPEGHK(1)AAAVLPVLDLAQR	-1.0777	1.5731	1.37445			0.589812	0.462634
Biological Process	GO:0022607	5	cellular component assembly	1.21	0.00365843	F1SM98	129	K	8.43	0.00183162	Up	NADH dehydrogenase [ubiquinone] flavoprotein 2, mitochondrial OS=Sus scrofa OX=9823 GN=NDUFV2 PE=1 SV=2	NDUFV2	0.999999	1.39096e-11	187.39	3	KPVGK(1)YHIQVCTTTPCMLR	-0.40942	1.15603	2.30693	1.90077	0.303165	0.15366	0.179452
Biological Process	GO:0022607	5	cellular component assembly	1.21	0.00365843	F1SM98	154	K	9.941	0.000565708	Up	NADH dehydrogenase [ubiquinone] flavoprotein 2, mitochondrial OS=Sus scrofa OX=9823 GN=NDUFV2 PE=1 SV=2	NDUFV2	1	1.26195e-13	251.43	2	NSDSILEAIQK(1)K	0.38184	1.79098	2.08905	1.57155	0.269162	0.143711	0.135543
Biological Process	GO:0022607	5	cellular component assembly	1.21	0.00365843	A0A286ZRL1	207	K	21.097	0.000452525	Up	ATP-dependent Clp protease proteolytic subunit OS=Sus scrofa OX=9823 GN=CLPP PE=1 SV=1	CLPP	1	0.000871267	188.49	2	QLYSIYAK(1)HTK	-0.52009	1.3331	1.57333	1.94041	0.0881838	0.0649798
Biological Process	GO:0022607	5	cellular component assembly	1.21	0.00365843	F1SHG7	250	K	13.864	0.00314805	Up	Nucleotide binding protein like OS=Sus scrofa OX=9823 GN=NUBPL PE=3 SV=4	NUBPL	1	0.01726	69.815	3	HK(1)THIFGADGAR	0.73524	1.72081		2.01008		0.15144	0.117673
Biological Process	GO:0022607	5	cellular component assembly	1.21	0.00365843	P03974	565	K	3.039	0.0249502	Up	Transitional endoplasmic reticulum ATPase OS=Sus scrofa OX=9823 GN=VCP PE=1 SV=5	VCP	1	0.0175941	119.57	2	EIFDK(1)AR	-0.40488	1.60489	1.19129	1.71841	0.814858	0.404479	0.266073
Biological Process	GO:0022607	5	cellular component assembly	1.21	0.00365843	P03974	524	K	5.143	0.0169195	Up	Transitional endoplasmic reticulum ATPase OS=Sus scrofa OX=9823 GN=VCP PE=1 SV=5	VCP	1	0.000261846	118.88	2	GVLFYGPPGCGK(1)TLLAK	-0.44957	1.31903	1.06889	2.63532	0.538068	0.259644	0.179049
Biological Process	GO:0022607	5	cellular component assembly	1.21	0.00365843	P03974	231	K	1.679	0.0168591	Up	Transitional endoplasmic reticulum ATPase OS=Sus scrofa OX=9823 GN=VCP PE=1 SV=5	VCP	1	0.00013247	126.83	3	HPALFK(1)AIGVKPPR	-0.38984	1.15086	1.15142	1.45769	0.897023	0.621327	0.721685
Biological Process	GO:0022607	5	cellular component assembly	1.21	0.00365843	P03974	386	K	3.986	0.0447343	Up	Transitional endoplasmic reticulum ATPase OS=Sus scrofa OX=9823 GN=VCP PE=1 SV=5	VCP	1	1.16306e-05	211.63	2	LEILQIHTK(1)NMK	-0.019291	1.21171	0.811354	2.26043	0.385984		0.330514
Biological Process	GO:0022607	5	cellular component assembly	1.21	0.00365843	A0A5G2RC13	175	K	9.334	0.000674368	Up	Stomatin like 2 OS=Sus scrofa OX=9823 GN=STOML2 PE=1 SV=1	STOML2	1	0.000436852	132.32	2	ESAINVAEGK(1)K	1.0999	1.36438	2.53313	1.52188	0.216881	0.217543	0.146186
Biological Process	GO:0022607	5	cellular component assembly	1.21	0.00365843	A0A286ZUN9	34	K	2.509	0.0476594	Up	Complex I-23kD OS=Sus scrofa OX=9823 GN=NDUFS8 PE=1 SV=2	NDUFS8	1	0.00333812	113.47	2	EPSMDMK(1)SVTDR	-0.027836	1.4719	1.59257	0.885955	0.421691	0.627889
Biological Process	GO:0022607	5	cellular component assembly	1.21	0.00365843	A0A286ZWH7	749	K	7.019	0.0151072	Up	A-kinase anchoring protein 4 OS=Sus scrofa OX=9823 GN=AKAP4 PE=3 SV=2	AKAP4	1	3.90465e-13	164.31	3	AALAELEEQAALANNANYQVSGPK(1)R	-0.54825	2.13901	1.36217			0.269417	0.229403
Biological Process	GO:0022607	5	cellular component assembly	1.21	0.00365843	A0A286ZWH7	606	K	21.925	0.0434356	Up	A-kinase anchoring protein 4 OS=Sus scrofa OX=9823 GN=AKAP4 PE=3 SV=2	AKAP4	1	9.65813e-105	389.16	3	ALSMK(1)HLESHGAPGPSTSLK	4.1908	1.12014	1.46786	3.15027	0.137801	0.00263279	0.121287
Biological Process	GO:0022607	5	cellular component assembly	1.21	0.00365843	A0A286ZWH7	467	K	21.326	0.000453244	Up	A-kinase anchoring protein 4 OS=Sus scrofa OX=9823 GN=AKAP4 PE=3 SV=2	AKAP4	1	7.04375e-28	283.82	2	CK(1)NQSLEFSAMK	2.1551	1.31075	1.43999	2.98051	0.0752059	0.0830729	0.110466
Biological Process	GO:0022607	5	cellular component assembly	1.21	0.00365843	A0A286ZWH7	414	K	5.987	0.000980642	Up	A-kinase anchoring protein 4 OS=Sus scrofa OX=9823 GN=AKAP4 PE=3 SV=2	AKAP4	1	5.44117e-188	454.08	3	NLHNITGVLMTDSDFVSAVK(1)R	2.3588	1.51825	1.33032	2.29268	0.36076	0.251898	0.246095
Biological Process	GO:0022607	5	cellular component assembly	1.21	0.00365843	A0A286ZWH7	570	K	28.264	9.55936e-05	Up	A-kinase anchoring protein 4 OS=Sus scrofa OX=9823 GN=AKAP4 PE=3 SV=2	AKAP4	1	9.89017e-149	416.41	3	GK(1)DAFEDDCPGSTMGYMTQSAQYEK	-0.41998	1.94307	1.56313	2.28877	0.0857405	0.0464784	0.0728103
Biological Process	GO:0022607	5	cellular component assembly	1.21	0.00365843	A0A286ZWH7	31	K	22.752	0.000475261	Up	A-kinase anchoring protein 4 OS=Sus scrofa OX=9823 GN=AKAP4 PE=3 SV=2	AKAP4	1	6.08477e-27	277.31	3	GMCK(1)VDLYSPTGQQDQDRK	-0.46962	1.97625	1.12877	2.64237	0.112583	0.072063	0.0679667
Biological Process	GO:0022607	5	cellular component assembly	1.21	0.00365843	A0A286ZWH7	145	K	16.075	0.00132114	Up	A-kinase anchoring protein 4 OS=Sus scrofa OX=9823 GN=AKAP4 PE=3 SV=2	AKAP4	1	6.64786e-77	293.19	4	HK(1)VGDTEGECHQLHSGNCYSVYADQLNMDYMANGPQNLR	3.0286	1.4825	1.99628	2.16982	0.199774	0.0632776	0.0883477
Biological Process	GO:0022607	5	cellular component assembly	1.21	0.00365843	A0A286ZWH7	382	K	10.915	0.000796362	Up	A-kinase anchoring protein 4 OS=Sus scrofa OX=9823 GN=AKAP4 PE=3 SV=2	AKAP4	1	1.36379e-115	408.57	2	HTK(1)EIVSDLIDSCMK	-0.018161	1.3453	1.36054	2.79059	0.186585	0.141425	0.175556
Biological Process	GO:0022607	5	cellular component assembly	1.21	0.00365843	A0A286ZWH7	305	K	8.608	0.000287665	Up	A-kinase anchoring protein 4 OS=Sus scrofa OX=9823 GN=AKAP4 PE=3 SV=2	AKAP4	1	2.0346e-05	210.27	2	K(1)TFLYSELSNK(1)NK	1.3031	1.30317	1.67907	2.39329	0.217493	0.196941	0.210035
Biological Process	GO:0022607	5	cellular component assembly	1.21	0.00365843	A0A286ZWH7	315	K	9.983	0.00278046	Up	A-kinase anchoring protein 4 OS=Sus scrofa OX=9823 GN=AKAP4 PE=3 SV=2	AKAP4	1	2.74215e-13	246.41	2	TFLYSELSNK(1)NK	0.94352	1.34005	1.3053	2.80835	0.262736	0.113524	0.17004
Biological Process	GO:0022607	5	cellular component assembly	1.21	0.00365843	A0A286ZPL5	434	K	8.906	0.00524077	Up	WD_REPEATS_REGION domain-containing protein OS=Sus scrofa OX=9823 GN=DNAI1 PE=4 SV=2	DNAI1	1	2.60651e-09	237.68	2	SGK(1)HTDPVWQVR	0.10058	1.47437	1.09106	2.08634	0.213719	0.1345
Biological Process	GO:0022607	5	cellular component assembly	1.21	0.00365843	A0A5G2QGK1	336	K	5.477	0.0214025	Up	Tubulin beta chain OS=Sus scrofa OX=9823 GN=TUBB4B PE=1 SV=1	TUBB4B	1	1.4668e-25	202.17	3	EVDEQMLNVQNK(1)NSSYFVEWIPNNVK	0.2218	1.7465	0.920376	2.40672	0.578085	0.167538	0.180776
Biological Process	GO:0070925	6	organelle assembly	1.43	0.00359158	A0A5G2QQD3	108	K	69.54	5.6459e-05	Up	Outer dense fiber of sperm tails 2 OS=Sus scrofa OX=9823 GN=ODF2 PE=3 SV=1	ODF2	1	0.00585361	110.88	2	TK(1)VPWMPPGK	0.7451	1.77472	1.83773	2.30249	0.0408053	0.0189012	0.0253516
Biological Process	GO:0070925	6	organelle assembly	1.43	0.00359158	A0A5G2QQD3	339	K	23.116	0.00200366	Up	Outer dense fiber of sperm tails 2 OS=Sus scrofa OX=9823 GN=ODF2 PE=3 SV=1	ODF2	1	1.81189e-05	168.8	2	LMEQQGALLK(1)R	0.18355	1.1951	1.79217	2.76394	0.146758	0.0403156	0.0617193
Biological Process	GO:0070925	6	organelle assembly	1.43	0.00359158	A0A286ZWH7	145	K	16.075	0.00132114	Up	A-kinase anchoring protein 4 OS=Sus scrofa OX=9823 GN=AKAP4 PE=3 SV=2	AKAP4	1	6.64786e-77	293.19	4	HK(1)VGDTEGECHQLHSGNCYSVYADQLNMDYMANGPQNLR	3.0286	1.4825	1.99628	2.16982	0.199774	0.0632776	0.0883477
Biological Process	GO:0070925	6	organelle assembly	1.43	0.00359158	A0A286ZWH7	382	K	10.915	0.000796362	Up	A-kinase anchoring protein 4 OS=Sus scrofa OX=9823 GN=AKAP4 PE=3 SV=2	AKAP4	1	1.36379e-115	408.57	2	HTK(1)EIVSDLIDSCMK	-0.018161	1.3453	1.36054	2.79059	0.186585	0.141425	0.175556
Biological Process	GO:0070925	6	organelle assembly	1.43	0.00359158	A0A286ZWH7	305	K	8.608	0.000287665	Up	A-kinase anchoring protein 4 OS=Sus scrofa OX=9823 GN=AKAP4 PE=3 SV=2	AKAP4	1	2.0346e-05	210.27	2	K(1)TFLYSELSNK(1)NK	1.3031	1.30317	1.67907	2.39329	0.217493	0.196941	0.210035
Biological Process	GO:0070925	6	organelle assembly	1.43	0.00359158	A0A286ZWH7	315	K	9.983	0.00278046	Up	A-kinase anchoring protein 4 OS=Sus scrofa OX=9823 GN=AKAP4 PE=3 SV=2	AKAP4	1	2.74215e-13	246.41	2	TFLYSELSNK(1)NK	0.94352	1.34005	1.3053	2.80835	0.262736	0.113524	0.17004
Biological Process	GO:0070925	6	organelle assembly	1.43	0.00359158	A0A286ZWH7	720	K	11.118	0.00184411	Up	A-kinase anchoring protein 4 OS=Sus scrofa OX=9823 GN=AKAP4 PE=3 SV=2	AKAP4	1	2.16906e-13	249.03	2	LCLIMAK(1)YSNNR	0.1232	1.84186	1.35942	1.51587	0.104054		0.178791
Biological Process	GO:0070925	6	organelle assembly	1.43	0.00359158	A0A286ZWH7	251	K	2.753	0.00153908	Up	A-kinase anchoring protein 4 OS=Sus scrofa OX=9823 GN=AKAP4 PE=3 SV=2	AKAP4	1	3.5157e-07	130	3	LEGGSK(1)CLHHSIYPPSGDK	2.4963	1.14511	1.47079	1.78552	0.516422	0.535683	0.546479
Biological Process	GO:0070925	6	organelle assembly	1.43	0.00359158	A0A286ZWH7	189	K	12.126	0.00793092	Up	A-kinase anchoring protein 4 OS=Sus scrofa OX=9823 GN=AKAP4 PE=3 SV=2	AKAP4	1	2.45295e-05	113.63	3	LEMTASK(1)NTNNNQSPSTPPAK	-0.073316	1.42267	1.24291	2.07385	0.0724343		0.188138
Biological Process	GO:0070925	6	organelle assembly	1.43	0.00359158	A0A286ZWH7	661	K	61.324	0.000144923	Up	A-kinase anchoring protein 4 OS=Sus scrofa OX=9823 GN=AKAP4 PE=3 SV=2	AKAP4	1	8.47928e-184	453.47	3	LLGESPFHCEDLCEGENK(1)R	0.35807	1.15329	1.8429	2.90755	0.0390561	0.0278876	0.0293276
Biological Process	GO:0070925	6	organelle assembly	1.43	0.00359158	A0A286ZWH7	444	K	14.769	3.26689e-05	Up	A-kinase anchoring protein 4 OS=Sus scrofa OX=9823 GN=AKAP4 PE=3 SV=2	AKAP4	1	1.83518e-05	207.29	3	LVSALLGEK(1)R	-0.32893	1.62458	1.70227	2.29266	0.144376	0.112371	0.123736
Biological Process	GO:0070925	6	organelle assembly	1.43	0.00359158	A0A286ZWH7	31	K	22.752	0.000475261	Up	A-kinase anchoring protein 4 OS=Sus scrofa OX=9823 GN=AKAP4 PE=3 SV=2	AKAP4	1	6.08477e-27	277.31	3	GMCK(1)VDLYSPTGQQDQDRK	-0.46962	1.97625	1.12877	2.64237	0.112583	0.072063	0.0679667
Biological Process	GO:0070925	6	organelle assembly	1.43	0.00359158	A0A286ZWH7	527	K	12.12	0.0178974	Up	A-kinase anchoring protein 4 OS=Sus scrofa OX=9823 GN=AKAP4 PE=3 SV=2	AKAP4	1	0.000104946	143.03	2	MASK(1)PCISNK	0.64829	1.2612		2.43393		0.14622	0.15865
Biological Process	GO:0070925	6	organelle assembly	1.43	0.00359158	A0A286ZWH7	489	K	26.717	0.00150584	Up	A-kinase anchoring protein 4 OS=Sus scrofa OX=9823 GN=AKAP4 PE=3 SV=2	AKAP4	1	4.31139e-06	215.34	2	MK(1)PEECK(1)PLTSAEK	-1.0084	1.52955	0.883659	3.37031	0.0650811	0.0609341	0.0904571
Biological Process	GO:0070925	6	organelle assembly	1.43	0.00359158	A0A286ZWH7	434	K	3.304	0.00635604	Up	A-kinase anchoring protein 4 OS=Sus scrofa OX=9823 GN=AKAP4 PE=3 SV=2	AKAP4	1	3.1256e-20	267.57	2	QNAADIMEAMLK(1)R	-0.041413	1.59191	1.47868			0.423629	0.505779
Biological Process	GO:0070925	6	organelle assembly	1.43	0.00359158	A0A286ZWH7	374	K	8.493	0.00571529	Up	A-kinase anchoring protein 4 OS=Sus scrofa OX=9823 GN=AKAP4 PE=3 SV=2	AKAP4	1	3.31554e-30	291.57	3	VHSSGK(1)PIPACMVLK(1)R	0.82975	1.14327	1.08706	3.13765	0.172836	0.180637	0.278544
Biological Process	GO:0070925	6	organelle assembly	1.43	0.00359158	A0A286ZWH7	98	K	36.44	0.000778339	Up	A-kinase anchoring protein 4 OS=Sus scrofa OX=9823 GN=AKAP4 PE=3 SV=2	AKAP4	1	5.70431e-39	311.76	2	QDQSK(1)TEGSVCLFK	-1.0167	1.56904	1.30211	2.96859	0.0768466	0.0274697	0.0559411
Biological Process	GO:0070925	6	organelle assembly	1.43	0.00359158	A0A286ZWH7	379	K	19.577	0.000162516	Up	A-kinase anchoring protein 4 OS=Sus scrofa OX=9823 GN=AKAP4 PE=3 SV=2	AKAP4	1	1.42086e-11	187.06	2	VLLK(1)HTK	0.18847	1.85556	1.34935	2.50351	0.118482	0.0781199	0.0949862
Biological Process	GO:0070925	6	organelle assembly	1.43	0.00359158	A0A286ZWH7	365	K	7.696	0.00903594	Up	A-kinase anchoring protein 4 OS=Sus scrofa OX=9823 GN=AKAP4 PE=3 SV=2	AKAP4	1	2.27248e-06	146.79	3	VHSSGK(1)PIPACMVLK(1)R	0.82975	1.39864	0.979601	2.93179	0.142211	0.187541	0.360218
Biological Process	GO:0070925	6	organelle assembly	1.43	0.00359158	A0A286ZWH7	508	K	8.899	0.00288638	Up	A-kinase anchoring protein 4 OS=Sus scrofa OX=9823 GN=AKAP4 PE=3 SV=2	AKAP4	1	1.24709e-11	234.04	3	VGEHILK(1)ESLTMWNQK	-0.48529	1.29837	1.49654	2.59896	0.136651	0.151059	0.318427
Biological Process	GO:0070925	6	organelle assembly	1.43	0.00359158	A0A286ZWH7	143	K	22.885	0.00339062	Up	A-kinase anchoring protein 4 OS=Sus scrofa OX=9823 GN=AKAP4 PE=3 SV=2	AKAP4	1	3.89589e-69	351.03	2	YALGFQHALSPSASSCK(1)HK	0.03494	1.4111	1.80191	1.64546		0.0383301	0.103206
Biological Process	GO:0070925	6	organelle assembly	1.43	0.00359158	A0A5G2RE71	304	K	4.851	0.00133816	Up	Actin related protein 2 OS=Sus scrofa OX=9823 GN=ACTR2 PE=1 SV=1	ACTR2	1	6.61194e-18	199.89	3	SEFYK(1)HIVLSGGSTMYPGLPSR	-0.38191	1.56038	1.1821	1.65338	0.305638		0.298503
Biological Process	GO:0070925	6	organelle assembly	1.43	0.00359158	A0A286ZWH7	533	K	154.429	0.00200602	Up	A-kinase anchoring protein 4 OS=Sus scrofa OX=9823 GN=AKAP4 PE=3 SV=2	AKAP4	1	2.72774e-06	212.39	2	PCISNK(1)EEK	-0.89916	1.25448	0.842468	2.88156	0.0090902		0.0124019
Biological Process	GO:0070925	6	organelle assembly	1.43	0.00359158	A0A286ZWH7	570	K	28.264	9.55936e-05	Up	A-kinase anchoring protein 4 OS=Sus scrofa OX=9823 GN=AKAP4 PE=3 SV=2	AKAP4	1	9.89017e-149	416.41	3	GK(1)DAFEDDCPGSTMGYMTQSAQYEK	-0.41998	1.94307	1.56313	2.28877	0.0857405	0.0464784	0.0728103
Biological Process	GO:0070925	6	organelle assembly	1.43	0.00359158	A0A286ZWH7	414	K	5.987	0.000980642	Up	A-kinase anchoring protein 4 OS=Sus scrofa OX=9823 GN=AKAP4 PE=3 SV=2	AKAP4	1	5.44117e-188	454.08	3	NLHNITGVLMTDSDFVSAVK(1)R	2.3588	1.51825	1.33032	2.29268	0.36076	0.251898	0.246095
Biological Process	GO:0070925	6	organelle assembly	1.43	0.00359158	A0A286ZWH7	467	K	21.326	0.000453244	Up	A-kinase anchoring protein 4 OS=Sus scrofa OX=9823 GN=AKAP4 PE=3 SV=2	AKAP4	1	7.04375e-28	283.82	2	CK(1)NQSLEFSAMK	2.1551	1.31075	1.43999	2.98051	0.0752059	0.0830729	0.110466
Biological Process	GO:0120031	7	plasma membrane bounded cell projection assembly	1.45	0.003581	F1SDE8	360	K	8.504	0.021205	Up	Tektin OS=Sus scrofa OX=9823 GN=TEKT3 PE=3 SV=2	TEKT3	1	0.00170209	129.56	2	NK(1)MQIHLAK	0.41011	0.946739	1.02788	2.66191	0.222667	0.140806
Biological Process	GO:0120031	7	plasma membrane bounded cell projection assembly	1.45	0.003581	F1SPN2	208	K	6.316	0.0374656	Up	Coiled-coil domain containing 65 OS=Sus scrofa OX=9823 GN=CCDC65 PE=4 SV=3	CCDC65	1	0.00180467	128.36	2	NLEEK(1)HFLR	-0.28046	1.29599	1.02616	2.20049	0.372116	0.105243
Biological Process	GO:0120031	7	plasma membrane bounded cell projection assembly	1.45	0.003581	F1SUR7	30	K	11.802	0.00607217	Up	DnaJ homolog subfamily B member 13 OS=Sus scrofa OX=9823 GN=DNAJB13 PE=4 SV=1	DNAJB13	1	0.000392315	152.47	2	LALK(1)NHPLR	-0.20438	1.80141	1.31553	2.41438	0.313762	0.0864943	0.0684123
Biological Process	GO:0120031	7	plasma membrane bounded cell projection assembly	1.45	0.003581	F1SUR7	21	K	8.745	0.0181538	Up	DnaJ homolog subfamily B member 13 OS=Sus scrofa OX=9823 GN=DNAJB13 PE=4 SV=1	DNAJB13	1	1.68635e-63	352.5	2	NSEDAQIK(1)NAYR	0.095786	1.54959	1.16996	1.92628	0.273942		0.0802215
Biological Process	GO:0120031	7	plasma membrane bounded cell projection assembly	1.45	0.003581	F1SV60	148	K	3.91	0.0323209	Up	Tektin OS=Sus scrofa OX=9823 GN=TEKT2 PE=3 SV=1	TEKT2	1	0.00794729	93.649	2	EVEVIEATK(1)K	0.4182	1.49199	1.05245	1.72723	0.515151		0.213187
Biological Process	GO:0120031	7	plasma membrane bounded cell projection assembly	1.45	0.003581	F1SV60	368	K	6.153	0.000776976	Up	Tektin OS=Sus scrofa OX=9823 GN=TEKT2 PE=3 SV=1	TEKT2	1	7.07533e-15	233.59	2	LAQAQDALDALYK(1)HLAR	-0.68831	1.75982	1.32782	2.07355	0.360263	0.215523	0.263026
Biological Process	GO:0120031	7	plasma membrane bounded cell projection assembly	1.45	0.003581	F1SV60	423	K	8.412	0.000175265	Up	Tektin OS=Sus scrofa OX=9823 GN=TEKT2 PE=3 SV=1	TEKT2	1	3.12071e-05	166.66	2	TLSPLK(1)TCQLELT	-0.14157	1.47332	1.76318	2.12604	0.26141	0.175097	0.200946
Biological Process	GO:0120031	7	plasma membrane bounded cell projection assembly	1.45	0.003581	F2Z513	27	K	6.696	0.00841924	Up	Cilia-and flagella-associated protein 20 OS=Sus scrofa OX=9823 GN=CFAP20 PE=4 SV=1	CFAP20	1	0.00354423	127.46	2	PLQIWDK(1)K	0.062147	1.45941	1.25897	2.50202	0.45282	0.139306	0.187473
Biological Process	GO:0120031	7	plasma membrane bounded cell projection assembly	1.45	0.003581	F2Z513	115	K	7.514	0.0198544	Up	Cilia-and flagella-associated protein 20 OS=Sus scrofa OX=9823 GN=CFAP20 PE=4 SV=1	CFAP20	1	0.00210955	117.53	2	VK(1)PFICTMPMR	-0.49846	1.86634	0.739585	1.98662	0.232067		0.175391
Biological Process	GO:0120031	7	plasma membrane bounded cell projection assembly	1.45	0.003581	I3LLI7	162	K	8.412	0.0429766	Up	Dynein axonemal intermediate chain 2 OS=Sus scrofa OX=9823 GN=DNAI2 PE=4 SV=2	DNAI2	1	0.0283084	94.874	2	DPQEIK(1)R	-1.1293	1.59666		1.97836	0.304803	0.12018
Biological Process	GO:0120031	7	plasma membrane bounded cell projection assembly	1.45	0.003581	I3LLI7	493	K	10.866	0.00603886	Up	Dynein axonemal intermediate chain 2 OS=Sus scrofa OX=9823 GN=DNAI2 PE=4 SV=2	DNAI2	1	4.12365e-13	240.1	2	NEK(1)NTASSIFER	-0.87971	1.3568	1.23673	2.11745	0.195219	0.0938039
Biological Process	GO:0120031	7	plasma membrane bounded cell projection assembly	1.45	0.003581	I3LN92	88	K	6.971	0.00792638	Up	NME/NM23 family member 5 OS=Sus scrofa OX=9823 GN=NME5 PE=3 SV=1	NME5	1	0.00335934	138.4	2	HK(1)AISYWK	-0.27729	1.23509	1.25389	2.75826	0.408931	0.189947	0.153881
Biological Process	GO:0120031	7	plasma membrane bounded cell projection assembly	1.45	0.003581	I3LN92	194	K	12.886	0.00756898	Up	NME/NM23 family member 5 OS=Sus scrofa OX=9823 GN=NME5 PE=3 SV=1	NME5	0.99455	3.07673e-06	116.39	4	QKPADPLIWLADWLLK(0.995)NNPNK(0.005)PK	-0.372	0.987814	1.3657	2.40053	0.155627		0.090329
Biological Process	GO:0070925	6	organelle assembly	1.43	0.00359158	A0A286ZUP1	70	K	4.021	0.021402	Up	Complement component 1 Q subcomponent-binding protein, mitochondrial OS=Sus scrofa OX=9823 GN=C1QBP PE=3 SV=1	C1QBP	1	1.40198e-09	232.14	2	AFVEFLNDEIK(1)EEK	-0.058356	1.52511	2.08628	1.19368	0.593344	0.17151	0.430082
Biological Process	GO:0070925	6	organelle assembly	1.43	0.00359158	A0A286ZUP1	73	K	11.393	0.0226966	Up	Complement component 1 Q subcomponent-binding protein, mitochondrial OS=Sus scrofa OX=9823 GN=C1QBP PE=3 SV=1	C1QBP	0.999998	3.6098e-40	314.29	2	AFVEFLNDEIKEEK(1)K	-0.7902		1.79907	2.61923	0.384649	0.108877	0.0881697
Biological Process	GO:0070925	6	organelle assembly	1.43	0.00359158	F1SIK9	155	K	7.029	0.00510714	Up	Septin OS=Sus scrofa OX=9823 GN=SEPTIN7 PE=1 SV=3	SEPTIN7	1	3.02486e-07	218.49	2	ADTLTPEECQQFK(1)K	0.54717	1.25871	1.0879	2.90614	0.310824	0.192489	0.243937
Biological Process	GO:0070925	6	organelle assembly	1.43	0.00359158	F1SIK9	245	K	4.026	0.00143966	Up	Septin OS=Sus scrofa OX=9823 GN=SEPTIN7 PE=1 SV=3	SEPTIN7	1	2.50359e-20	242.16	3	THMQDLK(1)DVTNNVHYENYR	0.054411	1.56067	1.20878	1.52017	0.384607	0.325777
Biological Process	GO:0070925	6	organelle assembly	1.43	0.00359158	A0A286ZP34	236	K	24.804	0.00101474	Up	HYDIN axonemal central pair apparatus protein OS=Sus scrofa OX=9823 GN=HYDIN PE=4 SV=2	HYDIN	1	0.0172191	57.019	3	DAVFHIK(1)THR	-0.88736	1.55066	1.41433	2.8025	0.119386	0.0403538	0.0727785
Biological Process	GO:0070925	6	organelle assembly	1.43	0.00359158	A0A286ZPL5	434	K	8.906	0.00524077	Up	WD_REPEATS_REGION domain-containing protein OS=Sus scrofa OX=9823 GN=DNAI1 PE=4 SV=2	DNAI1	1	2.60651e-09	237.68	2	SGK(1)HTDPVWQVR	0.10058	1.47437	1.09106	2.08634	0.213719	0.1345
Biological Process	GO:0070925	6	organelle assembly	1.43	0.00359158	A0A286ZWH7	749	K	7.019	0.0151072	Up	A-kinase anchoring protein 4 OS=Sus scrofa OX=9823 GN=AKAP4 PE=3 SV=2	AKAP4	1	3.90465e-13	164.31	3	AALAELEEQAALANNANYQVSGPK(1)R	-0.54825	2.13901	1.36217			0.269417	0.229403
Biological Process	GO:0070925	6	organelle assembly	1.43	0.00359158	A0A286ZWH7	606	K	21.925	0.0434356	Up	A-kinase anchoring protein 4 OS=Sus scrofa OX=9823 GN=AKAP4 PE=3 SV=2	AKAP4	1	9.65813e-105	389.16	3	ALSMK(1)HLESHGAPGPSTSLK	4.1908	1.12014	1.46786	3.15027	0.137801	0.00263279	0.121287
Biological Process	GO:0070925	6	organelle assembly	1.43	0.00359158	A0A5G2QGK1	297	K	5.298	0.00560968	Up	Tubulin beta chain OS=Sus scrofa OX=9823 GN=TUBB4B PE=1 SV=1	TUBB4B	1	1.3308e-38	276.63	3	ALTVPELTQQMFDAK(1)NMMAACDPR	3.4661	1.58078	1.13678	2.32981	0.436533	0.198463	0.317634
Biological Process	GO:0070925	6	organelle assembly	1.43	0.00359158	A0A5G2QQD3	297	K	12.021	0.0006451	Up	Outer dense fiber of sperm tails 2 OS=Sus scrofa OX=9823 GN=ODF2 PE=3 SV=1	ODF2	1	6.20789e-06	217.02	2	QK(1)ELLLQK	-0.25407	1.80953	1.53058	2.1991	0.22736	0.099837	0.133592
Biological Process	GO:0070925	6	organelle assembly	1.43	0.00359158	A0A5G2QGK1	336	K	5.477	0.0214025	Up	Tubulin beta chain OS=Sus scrofa OX=9823 GN=TUBB4B PE=1 SV=1	TUBB4B	1	1.4668e-25	202.17	3	EVDEQMLNVQNK(1)NSSYFVEWIPNNVK	0.2218	1.7465	0.920376	2.40672	0.578085	0.167538	0.180776
Biological Process	GO:0070925	6	organelle assembly	1.43	0.00359158	A0A5G2QGK1	58	K	6.046	0.00924907	Up	Tubulin beta chain OS=Sus scrofa OX=9823 GN=TUBB4B PE=1 SV=1	TUBB4B	1	7.08926e-52	319.37	2	INVYYNEATGGK(1)YVPR	0.44775	1.49518	1.33768	2.31564	0.514004	0.16492	0.172565
Biological Process	GO:0070925	6	organelle assembly	1.43	0.00359158	A0A5G2QE15	142	K	9.701	0.0136603	Up	Zona pellucida-binding protein 1 OS=Sus scrofa OX=9823 GN=ZPBP PE=3 SV=1	ZPBP	1	5.77901e-95	383.43	3	PTVEEVVK(1)NLQLK	-0.14956	1.10704	1.24123	3.09106	0.344829	0.14542	0.0704291
Biological Process	GO:0070925	6	organelle assembly	1.43	0.00359158	A0A5G2QE15	181	K	7.559	0.00827177	Up	Zona pellucida-binding protein 1 OS=Sus scrofa OX=9823 GN=ZPBP PE=3 SV=1	ZPBP	1	9.73512e-100	379.4	3	YHAAPCNSIYNISFEK(1)K	0.097152	1.51895	1.20442	2.5756	0.423639	0.145895	0.131506
Biological Process	GO:0070925	6	organelle assembly	1.43	0.00359158	A0A5G2QHV4	383	K	13.353	0.00478197	Up	Sperm associated antigen 6 OS=Sus scrofa OX=9823 GN=SPAG6 PE=4 SV=1	SPAG6	1	0.000234419	196.86	2	AIK(1)NILQK	0.051531	1.18769	1.3385	3.05577	0.247093	0.0920181	0.0789303
Biological Process	GO:0070925	6	organelle assembly	1.43	0.00359158	A0A5G2QHV4	241	K	7.032	0.00489301	Up	Sperm associated antigen 6 OS=Sus scrofa OX=9823 GN=SPAG6 PE=4 SV=1	SPAG6	1	0.0178538	119.17	2	DK(1)DEYVK	2.5852	1.21484	1.23394	2.11822	0.245345		0.187651
Biological Process	GO:0070925	6	organelle assembly	1.43	0.00359158	A0A5G2QHV4	258	K	14.735	0.0123856	Up	Sperm associated antigen 6 OS=Sus scrofa OX=9823 GN=SPAG6 PE=4 SV=1	SPAG6	1	8.3393e-29	206	4	EIAK(1)HTPELSQLIVNAGGVAAVIDCIGSCK	-0.26782	1.02412	1.3687	2.39076	0.16095		0.0554727
Biological Process	GO:0070925	6	organelle assembly	1.43	0.00359158	A0A5G2QHV4	435	K	6.85	0.00640272	Up	Sperm associated antigen 6 OS=Sus scrofa OX=9823 GN=SPAG6 PE=4 SV=1	SPAG6	1	0.00603121	99.802	2	LFVTSGGLK(1)K	-1.0103	1.17038	1.21713	2.84817	0.371769	0.201043	0.19151
Biological Process	GO:0070925	6	organelle assembly	1.43	0.00359158	A0A5G2QNW8	122	K	40.572	0.0008097	Up	Dynein heavy chain 8, axonemal(predicted) OS=Sus scrofa OX=9823 PE=3 SV=1	--	1	0.000552886	143.04	2	VK(1)NEVQEVK	-0.90021	1.65197	1.09498	2.17222	0.0437508		0.0370796
Biological Process	GO:0070925	6	organelle assembly	1.43	0.00359158	A0A5G2QQD3	459	K	4.8	0.00466506	Up	Outer dense fiber of sperm tails 2 OS=Sus scrofa OX=9823 GN=ODF2 PE=3 SV=1	ODF2	1	2.87206e-11	182.7	3	AEK(1)SEEYAEQLHVQLADK	0.1325	1.23089	1.80738	1.92731	0.444759	0.3879	0.201759
Biological Process	GO:0070925	6	organelle assembly	1.43	0.00359158	A0A5G2QQD3	377	K	22.934	0.00235578	Up	Outer dense fiber of sperm tails 2 OS=Sus scrofa OX=9823 GN=ODF2 PE=3 SV=1	ODF2	1	0.000225348	148.32	2	AQAK(1)TASELSK	-0.020086		2.29616	2.3969	0.159082	0.0712524	0.076609
Biological Process	GO:0070925	6	organelle assembly	1.43	0.00359158	A0A5G2QE15	69	K	3.359	0.0367671	Up	Zona pellucida-binding protein 1 OS=Sus scrofa OX=9823 GN=ZPBP PE=3 SV=1	ZPBP	1	1.76238e-13	219.01	4	VYVMLHQK(1)SPHVLCVTQR	-0.073309	0.761124	1.33627	2.52613	0.531475	0.449453	0.395551
Biological Process	GO:0070925	6	organelle assembly	1.43	0.00359158	A0A5G2QQD3	384	K	47.561	0.000112013	Up	Outer dense fiber of sperm tails 2 OS=Sus scrofa OX=9823 GN=ODF2 PE=3 SV=1	ODF2	1	4.46546e-14	254.53	2	TASELSK(1)SMESMR	0.80782	1.39487	2.06886	2.41271	0.0585644	0.0310926	0.0338989
Biological Process	GO:0070925	6	organelle assembly	1.43	0.00359158	A0A5G2QQD3	591	K	22.227	0.000913048	Up	Outer dense fiber of sperm tails 2 OS=Sus scrofa OX=9823 GN=ODF2 PE=3 SV=1	ODF2	1	3.94375e-22	267.91	2	NYEGMIDNYK(1)SQVMK	-0.2147	1.37621	1.23724	3.12824	0.114997	0.0611951	0.0821271
Biological Process	GO:0070925	6	organelle assembly	1.43	0.00359158	A0A5G2QQD3	241	K	28.673	7.79228e-05	Up	Outer dense fiber of sperm tails 2 OS=Sus scrofa OX=9823 GN=ODF2 PE=3 SV=1	ODF2	1	2.63086e-13	249.69	2	IKEEKDFTVLQK(1)K	-0.25951	1.7698	1.94951	2.07849	0.0892899	0.0679612	0.0449544
Biological Process	GO:0070925	6	organelle assembly	1.43	0.00359158	A0A5G2QQD3	242	K	93.632	0.000827518	Up	Outer dense fiber of sperm tails 2 OS=Sus scrofa OX=9823 GN=ODF2 PE=3 SV=1	ODF2	1	2.70656e-19	262.24	2	K(1)HLQQEK	-0.89588	0.976955	2.0046	1.9831	0.0150557		0.0202929
Biological Process	GO:0070925	6	organelle assembly	1.43	0.00359158	A0A5G2QQD3	687	K	5.766	0.00573386	Up	Outer dense fiber of sperm tails 2 OS=Sus scrofa OX=9823 GN=ODF2 PE=3 SV=1	ODF2	1	0.000199061	178.46	3	DWQK(1)GSHELAR	-4.3314	1.75731	2.21047		0.476861	0.290002	0.26535
Biological Process	GO:0070925	6	organelle assembly	1.43	0.00359158	A0A5G2QQD3	254	K	3.596	0.0457166	Up	Outer dense fiber of sperm tails 2 OS=Sus scrofa OX=9823 GN=ODF2 PE=3 SV=1	ODF2	1	6.17738e-26	259.1	3	HLQQEK(1)ECLMSK(1)LVEAEMDGAAAAK	-0.0522	1.6448	2.01579	1.03384	0.880279	0.186791	0.238499
Biological Process	GO:0070925	6	organelle assembly	1.43	0.00359158	A0A5G2QQD3	182	K	73.773	0.000748508	Up	Outer dense fiber of sperm tails 2 OS=Sus scrofa OX=9823 GN=ODF2 PE=3 SV=1	ODF2	1	2.0385e-159	437.41	2	KIDSLMNAVGCLK(1)SEVK	-0.22037	1.57079	1.64752	2.70145	0.0472426	0.0229699	0.0100304
Biological Process	GO:0070925	6	organelle assembly	1.43	0.00359158	A0A5G2QQD3	619	K	7.006	4.60828e-05	Up	Outer dense fiber of sperm tails 2 OS=Sus scrofa OX=9823 GN=ODF2 PE=3 SV=1	ODF2	1	0.000898223	180.18	2	ILK(1)DEMNK	-0.010783	1.62345	1.93116	1.69598	0.290446	0.245573	0.213388
Biological Process	GO:0070925	6	organelle assembly	1.43	0.00359158	A0A5G2QQD3	556	K	2.888	0.00661531	Up	Outer dense fiber of sperm tails 2 OS=Sus scrofa OX=9823 GN=ODF2 PE=3 SV=1	ODF2	1	0.00208521	117.67	2	LK(1)ASFAPMEDK	0.75585	1.19342	1.23329	2.03011	0.558436	0.571056	0.413685
Biological Process	GO:0070925	6	organelle assembly	1.43	0.00359158	A0A5G2QQD3	358	K	42.867	0.017392	Up	Outer dense fiber of sperm tails 2 OS=Sus scrofa OX=9823 GN=ODF2 PE=3 SV=1	ODF2	1	7.90589e-23	231.89	2	LLLLLQDK(1)DK	0.60428	1.27351	2.63531			0.0607322	0.0304517
Biological Process	GO:0070925	6	organelle assembly	1.43	0.00359158	A0A5G2QQD3	581	K	23.541	0.00442824	Up	Outer dense fiber of sperm tails 2 OS=Sus scrofa OX=9823 GN=ODF2 PE=3 SV=1	ODF2	1	1.77101e-14	253.97	2	ASVK(1)NYEGMIDNYK	0.23787	1.08105	1.30815	3.36632	0.156912	0.0386281	0.0489472
Biological Process	GO:0070925	6	organelle assembly	1.43	0.00359158	A0A5G2QE15	301	K	11.033	0.00106216	Up	Zona pellucida-binding protein 1 OS=Sus scrofa OX=9823 GN=ZPBP PE=3 SV=1	ZPBP	1	1.88261e-05	150.08	3	CFPGYGMNILK(1)HPK	-0.10836	1.30275	1.42516	2.77347	0.148631	0.134137	0.215851
Biological Process	GO:0070925	6	organelle assembly	1.43	0.00359158	A0A5G2QE15	252	K	4.588	0.0173646	Up	Zona pellucida-binding protein 1 OS=Sus scrofa OX=9823 GN=ZPBP PE=3 SV=1	ZPBP	1	0.0116695	151.29	2	AK(1)NLIER	2.2462	1.12094	1.13883	2.66652	0.534322	0.318087	0.221299
Biological Process	GO:0070925	6	organelle assembly	1.43	0.00359158	A0A5G2RNC0	20	K	7.507	0.00593474	Up	Dynein regulatory complex subunit 4 OS=Sus scrofa OX=9823 GN=GAS8 PE=3 SV=1	GAS8	1	7.61859e-08	192.24	3	VK(1)HLLYEHQNSLTEMK	0.12312	1.33392	1.05791	2.20036		0.211521	0.196287
Biological Process	GO:0070925	6	organelle assembly	1.43	0.00359158	A0A287A3S5	419	K	12.806	0.0108239	Up	Tektin OS=Sus scrofa OX=9823 GN=TEKT4 PE=3 SV=1	TEKT4	1	1.51407e-13	244.01	2	DLAVK(1)TNSLFINR	0.09173	1.44813	0.916578	2.38787	0.166523	0.0808966
Biological Process	GO:0070925	6	organelle assembly	1.43	0.00359158	A0A287A3S5	218	K	9.461	0.00358398	Up	Tektin OS=Sus scrofa OX=9823 GN=TEKT4 PE=3 SV=1	TEKT4	1	4.44431e-46	282.6	3	ETCEMGWSDK(1)VEAYNIDEACCR	-1.1944	1.23857	1.19597	2.23634	0.158491		0.170628
Biological Process	GO:0070925	6	organelle assembly	1.43	0.00359158	A0A287A3S5	317	K	13.716	0.00143311	Up	Tektin OS=Sus scrofa OX=9823 GN=TEKT4 PE=3 SV=1	TEKT4	1	0.000430341	164.71	2	HK(1)LEYHLR	-1.5191	1.39365	1.46817	2.73045	0.206355	0.115789	0.0855747
Biological Process	GO:0070925	6	organelle assembly	1.43	0.00359158	A0A287A3S5	191	K	6.292	0.000312484	Up	Tektin OS=Sus scrofa OX=9823 GN=TEKT4 PE=3 SV=1	TEKT4	1	0.00256796	138.54	2	NIQELLK(1)R	0.21348	1.69283	1.60921	1.87512	0.363587	0.225203	0.234053
Biological Process	GO:0070925	6	organelle assembly	1.43	0.00359158	A0A287A3S5	114	K	23.948	0.00108972	Up	Tektin OS=Sus scrofa OX=9823 GN=TEKT4 PE=3 SV=1	TEKT4	1	7.33063e-68	336.37	2	VGEHLQDTHCWK(1)SELQR	-0.44875	1.65227	1.18144	2.92579	0.119775	0.0472285	0.073495
Biological Process	GO:0070925	6	organelle assembly	1.43	0.00359158	A0A287A4I2	128	K	5.34	0.00205054	Up	Radial spoke head component 1 OS=Sus scrofa OX=9823 GN=RSPH1 PE=4 SV=2	RSPH1	1	0.000161275	146.79	2	FLNK(1)NPVGPGK	0.52202	1.4233	1.6029	2.02743	0.460834	0.256954	0.228574
Biological Process	GO:0070925	6	organelle assembly	1.43	0.00359158	A0A287A4I2	135	K	6.629	0.00206297	Up	Radial spoke head component 1 OS=Sus scrofa OX=9823 GN=RSPH1 PE=4 SV=2	RSPH1	1	7.45686e-21	222.06	3	NPVGPGK(1)YVFDIGCEQHGEYR	-0.43577	1.85322	1.26773	2.09254	0.38313	0.222722	0.180661
Biological Process	GO:0070925	6	organelle assembly	1.43	0.00359158	A0A287A4I2	38	K	10.558	0.0037319	Up	Radial spoke head component 1 OS=Sus scrofa OX=9823 GN=RSPH1 PE=4 SV=2	RSPH1	1	4.43029e-39	311.71	3	K(1)HGQGTFIYPDGSR	0.39587	1.59499	1.043	2.84287	0.26844	0.127124	0.123578
Biological Process	GO:0070925	6	organelle assembly	1.43	0.00359158	A0A287A4I2	35	K	12.396	0.00411583	Up	Radial spoke head component 1 OS=Sus scrofa OX=9823 GN=RSPH1 PE=4 SV=2	RSPH1	1	0.00054582	143.12	2	YIGEYVK(1)NK	0.10335	1.30571	1.32682	2.91957	0.259379	0.103955	0.0845625
Biological Process	GO:0070925	6	organelle assembly	1.43	0.00359158	A0A287A4I2	105	K	3.477	0.00839303	Up	Radial spoke head component 1 OS=Sus scrofa OX=9823 GN=RSPH1 PE=4 SV=2	RSPH1	1	7.67174e-32	264.92	3	YVGTWVK(1)GQQEGAAELIHLNHR	0.22136	1.50107	1.11414	2.04448	0.590065	0.44394	0.306301
Biological Process	GO:0070925	6	organelle assembly	1.43	0.00359158	A0A287AKY1	366	K	13.984	0.00392011	Up	cAMP-dependent protein kinase type I-alpha regulatory subunit OS=Sus scrofa OX=9823 GN=PRKAR1A PE=3 SV=1	PRKAR1A	1	0.000170996	139.96	2	VLGPCSDILK(1)R	-0.28903	1.92824	1.39351	2.27782	0.258562	0.0841795	0.0576848
Biological Process	GO:0070925	6	organelle assembly	1.43	0.00359158	A0A287AUN6	211	K	7.175	0.00728864	Up	WD_REPEATS_REGION domain-containing protein OS=Sus scrofa OX=9823 GN=SPAG16 PE=4 SV=2	SPAG16	1	0.0241427	82.452	2	LINDLK(1)GLK	0.18539	1.92039		2.21504	0.429662	0.240148	0.194754
Biological Process	GO:0070925	6	organelle assembly	1.43	0.00359158	F1RMH1	480	K	5.173	0.00300815	Up	Cilia and flagella associated protein 100 OS=Sus scrofa OX=9823 GN=CFAP100 PE=4 SV=3	CFAP100	1	0.0167248	58.268	3	VFHFGEYK(1)GDQEDK	-0.54691	2.16364	1.17086	1.69357	0.448759	0.245719	0.277444
Biological Process	GO:0070925	6	organelle assembly	1.43	0.00359158	A0A287B5J3	76	K	6.685	0.0207492	Up	Dynein axonemal light chain 1 OS=Sus scrofa OX=9823 GN=DNAL1 PE=4 SV=2	DNAL1	1	0.0224542	103.29	2	GIHVMK(1)K	-0.023259	1.30811	1.29997	1.93853	0.342586		0.110808
Biological Process	GO:0070925	6	organelle assembly	1.43	0.00359158	A0A287B9W3	2862	K	12.185	0.0151568	Up	Cytoplasmic dynein 1 heavy chain 1(predicted) OS=Sus scrofa OX=9823 GN=DYNC1H1 PE=1 SV=2	DYNC1H1	1	0.0221965	83.753	2	HFPNIDK(1)EK	0.034155	1.12423	0.939017	2.67739	0.171405	0.0879639
Biological Process	GO:0070925	6	organelle assembly	1.43	0.00359158	F1RVJ8	304	K	6.423	0.0189962	Up	Armadillo repeat containing 4 OS=Sus scrofa OX=9823 GN=ODAD2 PE=4 SV=3	ODAD2	1	0.000546996	175.49	2	EK(1)SAVFSENMSK	-0.15641	1.51775	0.688228	2.98573	0.356283	0.229028	0.222982
Biological Process	GO:0070925	6	organelle assembly	1.43	0.00359158	F1RVJ8	115	K	15.114	0.00315431	Up	Armadillo repeat containing 4 OS=Sus scrofa OX=9823 GN=ODAD2 PE=4 SV=3	ODAD2	1	0.000290204	164.77	2	LLFIAK(1)NTK	0.63575	1.35757	1.19159	3.0785	0.204272	0.0727326	0.0953359
Biological Process	GO:0070925	6	organelle assembly	1.43	0.00359158	F1RVJ8	944	K	14.346	0.0289831	Up	Armadillo repeat containing 4 OS=Sus scrofa OX=9823 GN=ODAD2 PE=4 SV=3	ODAD2	1	3.50162e-13	250.12	2	YLK(1)SSDTNVHR	0.21758		1.36239	2.37696	0.17732		0.08333
Biological Process	GO:0070925	6	organelle assembly	1.43	0.00359158	A0A5G2Q9J9	153	K	24.524	0.00175499	Up	Spermatogenesis associated 6 OS=Sus scrofa OX=9823 GN=SPATA6 PE=3 SV=1	SPATA6	1	4.0287e-05	128.95	3	FTYHTAPVEK(1)SHSR	1.6748	1.60234	1.69285	1.57248	0.0404371	0.0918881
Biological Process	GO:0070925	6	organelle assembly	1.43	0.00359158	A0A5G2RNC0	221	K	6.576	0.0247743	Up	Dynein regulatory complex subunit 4 OS=Sus scrofa OX=9823 GN=GAS8 PE=3 SV=1	GAS8	1	0.00538113	114.97	2	DK(1)HILLGAK	1.1228	1.01671	1.28508	2.23797	0.330475	0.129767
Biological Process	GO:0070925	6	organelle assembly	1.43	0.00359158	A0A5G2RNC0	254	K	3.997	0.0374818	Up	Dynein regulatory complex subunit 4 OS=Sus scrofa OX=9823 GN=GAS8 PE=3 SV=1	GAS8	1	0.0133342	107.29	2	FIK(1)VQQER	0.22981	1.42711	1.1262	1.73194	0.528202	0.186551
Biological Process	GO:0070925	6	organelle assembly	1.43	0.00359158	A0A5G2QGK1	350	K	11.364	0.0357481	Up	Tubulin beta chain OS=Sus scrofa OX=9823 GN=TUBB4B PE=1 SV=1	TUBB4B	1	4.79316e-62	329.65	2	NSSYFVEWIPNNVK(1)TAVCDIPPR	0.23423	1.15309	0.753552	2.8163	0.212877		0.064183
Biological Process	GO:0120031	7	plasma membrane bounded cell projection assembly	1.45	0.003581	F1SDE8	57	K	14.24	0.000171441	Up	Tektin OS=Sus scrofa OX=9823 GN=TEKT3 PE=3 SV=2	TEKT3	1	2.45032e-21	145.43	3	PSTYYK(1)AASNWPALDPYCTR	0.25709	1.63762	1.70604	2.26264	0.17732	0.10149	0.114881
Biological Process	GO:0022607	5	cellular component assembly	1.21	0.00365843	A0A5G2QGK1	350	K	11.364	0.0357481	Up	Tubulin beta chain OS=Sus scrofa OX=9823 GN=TUBB4B PE=1 SV=1	TUBB4B	1	4.79316e-62	329.65	2	NSSYFVEWIPNNVK(1)TAVCDIPPR	0.23423	1.15309	0.753552	2.8163	0.212877		0.064183
Biological Process	GO:0022607	5	cellular component assembly	1.21	0.00365843	A0A287A2J9	464	K	6.23	0.0154545	Up	Cullin 3 OS=Sus scrofa OX=9823 GN=CUL3 PE=1 SV=2	CUL3	1	2.33733e-05	202.56	2	LK(1)TECGCQFTSK	0.19572	1.65867	0.946626	2.56486	0.498666	0.159481	0.171701
Biological Process	GO:0022607	5	cellular component assembly	1.21	0.00365843	A0A5G2QNW8	122	K	40.572	0.0008097	Up	Dynein heavy chain 8, axonemal(predicted) OS=Sus scrofa OX=9823 PE=3 SV=1	--	1	0.000552886	143.04	2	VK(1)NEVQEVK	-0.90021	1.65197	1.09498	2.17222	0.0437508		0.0370796
Biological Process	GO:0022607	5	cellular component assembly	1.21	0.00365843	A0A5G2QQD3	459	K	4.8	0.00466506	Up	Outer dense fiber of sperm tails 2 OS=Sus scrofa OX=9823 GN=ODF2 PE=3 SV=1	ODF2	1	2.87206e-11	182.7	3	AEK(1)SEEYAEQLHVQLADK	0.1325	1.23089	1.80738	1.92731	0.444759	0.3879	0.201759
Biological Process	GO:0022607	5	cellular component assembly	1.21	0.00365843	A0A5G2QQD3	377	K	22.934	0.00235578	Up	Outer dense fiber of sperm tails 2 OS=Sus scrofa OX=9823 GN=ODF2 PE=3 SV=1	ODF2	1	0.000225348	148.32	2	AQAK(1)TASELSK	-0.020086		2.29616	2.3969	0.159082	0.0712524	0.076609
Biological Process	GO:0022607	5	cellular component assembly	1.21	0.00365843	A0A5G2QQD3	384	K	47.561	0.000112013	Up	Outer dense fiber of sperm tails 2 OS=Sus scrofa OX=9823 GN=ODF2 PE=3 SV=1	ODF2	1	4.46546e-14	254.53	2	TASELSK(1)SMESMR	0.80782	1.39487	2.06886	2.41271	0.0585644	0.0310926	0.0338989
Biological Process	GO:0022607	5	cellular component assembly	1.21	0.00365843	A0A5G2QQD3	581	K	23.541	0.00442824	Up	Outer dense fiber of sperm tails 2 OS=Sus scrofa OX=9823 GN=ODF2 PE=3 SV=1	ODF2	1	1.77101e-14	253.97	2	ASVK(1)NYEGMIDNYK	0.23787	1.08105	1.30815	3.36632	0.156912	0.0386281	0.0489472
Biological Process	GO:0022607	5	cellular component assembly	1.21	0.00365843	A0A5G2QQD3	591	K	22.227	0.000913048	Up	Outer dense fiber of sperm tails 2 OS=Sus scrofa OX=9823 GN=ODF2 PE=3 SV=1	ODF2	1	3.94375e-22	267.91	2	NYEGMIDNYK(1)SQVMK	-0.2147	1.37621	1.23724	3.12824	0.114997	0.0611951	0.0821271
Biological Process	GO:0022607	5	cellular component assembly	1.21	0.00365843	A0A5G2QQD3	241	K	28.673	7.79228e-05	Up	Outer dense fiber of sperm tails 2 OS=Sus scrofa OX=9823 GN=ODF2 PE=3 SV=1	ODF2	1	2.63086e-13	249.69	2	IKEEKDFTVLQK(1)K	-0.25951	1.7698	1.94951	2.07849	0.0892899	0.0679612	0.0449544
Biological Process	GO:0022607	5	cellular component assembly	1.21	0.00365843	A0A5G2QQD3	242	K	93.632	0.000827518	Up	Outer dense fiber of sperm tails 2 OS=Sus scrofa OX=9823 GN=ODF2 PE=3 SV=1	ODF2	1	2.70656e-19	262.24	2	K(1)HLQQEK	-0.89588	0.976955	2.0046	1.9831	0.0150557		0.0202929
Biological Process	GO:0022607	5	cellular component assembly	1.21	0.00365843	A0A5G2QQD3	687	K	5.766	0.00573386	Up	Outer dense fiber of sperm tails 2 OS=Sus scrofa OX=9823 GN=ODF2 PE=3 SV=1	ODF2	1	0.000199061	178.46	3	DWQK(1)GSHELAR	-4.3314	1.75731	2.21047		0.476861	0.290002	0.26535
Biological Process	GO:0022607	5	cellular component assembly	1.21	0.00365843	A0A5G2QMG1	22	K	4.144	0.0124289	Up	CCT-beta OS=Sus scrofa OX=9823 GN=CCT2 PE=1 SV=1	CCT2	1	4.63809e-11	171.91	2	LSSFIGAIAIGDLVK(1)STLGPK	0.33496	1.62151	1.0065	2.20559	0.568983	0.249522	0.347902
Biological Process	GO:0022607	5	cellular component assembly	1.21	0.00365843	A0A5G2QQD3	254	K	3.596	0.0457166	Up	Outer dense fiber of sperm tails 2 OS=Sus scrofa OX=9823 GN=ODF2 PE=3 SV=1	ODF2	1	6.17738e-26	259.1	3	HLQQEK(1)ECLMSK(1)LVEAEMDGAAAAK	-0.0522	1.6448	2.01579	1.03384	0.880279	0.186791	0.238499
Biological Process	GO:0022607	5	cellular component assembly	1.21	0.00365843	A0A5G2QQD3	619	K	7.006	4.60828e-05	Up	Outer dense fiber of sperm tails 2 OS=Sus scrofa OX=9823 GN=ODF2 PE=3 SV=1	ODF2	1	0.000898223	180.18	2	ILK(1)DEMNK	-0.010783	1.62345	1.93116	1.69598	0.290446	0.245573	0.213388
Biological Process	GO:0022607	5	cellular component assembly	1.21	0.00365843	A0A5G2QQD3	556	K	2.888	0.00661531	Up	Outer dense fiber of sperm tails 2 OS=Sus scrofa OX=9823 GN=ODF2 PE=3 SV=1	ODF2	1	0.00208521	117.67	2	LK(1)ASFAPMEDK	0.75585	1.19342	1.23329	2.03011	0.558436	0.571056	0.413685
Biological Process	GO:0022607	5	cellular component assembly	1.21	0.00365843	A0A5G2QQD3	358	K	42.867	0.017392	Up	Outer dense fiber of sperm tails 2 OS=Sus scrofa OX=9823 GN=ODF2 PE=3 SV=1	ODF2	1	7.90589e-23	231.89	2	LLLLLQDK(1)DK	0.60428	1.27351	2.63531			0.0607322	0.0304517
Biological Process	GO:0022607	5	cellular component assembly	1.21	0.00365843	A0A5G2QQD3	339	K	23.116	0.00200366	Up	Outer dense fiber of sperm tails 2 OS=Sus scrofa OX=9823 GN=ODF2 PE=3 SV=1	ODF2	1	1.81189e-05	168.8	2	LMEQQGALLK(1)R	0.18355	1.1951	1.79217	2.76394	0.146758	0.0403156	0.0617193
Biological Process	GO:0022607	5	cellular component assembly	1.21	0.00365843	A0A5G2QQD3	297	K	12.021	0.0006451	Up	Outer dense fiber of sperm tails 2 OS=Sus scrofa OX=9823 GN=ODF2 PE=3 SV=1	ODF2	1	6.20789e-06	217.02	2	QK(1)ELLLQK	-0.25407	1.80953	1.53058	2.1991	0.22736	0.099837	0.133592
Biological Process	GO:0022607	5	cellular component assembly	1.21	0.00365843	A0A5G2QQD3	108	K	69.54	5.6459e-05	Up	Outer dense fiber of sperm tails 2 OS=Sus scrofa OX=9823 GN=ODF2 PE=3 SV=1	ODF2	1	0.00585361	110.88	2	TK(1)VPWMPPGK	0.7451	1.77472	1.83773	2.30249	0.0408053	0.0189012	0.0253516
Biological Process	GO:0022607	5	cellular component assembly	1.21	0.00365843	A0A5G2QQD3	116	K	44.59	6.4448e-05	Up	Outer dense fiber of sperm tails 2 OS=Sus scrofa OX=9823 GN=ODF2 PE=3 SV=1	ODF2	1	4.22569e-05	150.61	2	VPWMPPGK(1)SSAR	0.08693	1.50645	1.97375	2.3882	0.0595762	0.0333653	0.0386662
Biological Process	GO:0022607	5	cellular component assembly	1.21	0.00365843	A0A5G2QQD3	86	K	57.689	0.000220107	Up	Outer dense fiber of sperm tails 2 OS=Sus scrofa OX=9823 GN=ODF2 PE=3 SV=1	ODF2	1	1.27219e-21	262.43	3	TPCGAPSVTVTK(1)SHK(1)R	-0.032243	1.35893	1.69412	2.84471	0.0418123	0.0204295	0.0399924
Biological Process	GO:0022607	5	cellular component assembly	1.21	0.00365843	A0A5G2QQD3	106	K	44.385	0.00481902	Up	Outer dense fiber of sperm tails 2 OS=Sus scrofa OX=9823 GN=ODF2 PE=3 SV=1	ODF2	0.999953	0.000214564	143.79	2	VK(1)TKVPWMPPGK	0.0090632	1.89254	2.01932		0.0326699		0.0554654
Biological Process	GO:0022607	5	cellular component assembly	1.21	0.00365843	A0A5G2QQD3	182	K	73.773	0.000748508	Up	Outer dense fiber of sperm tails 2 OS=Sus scrofa OX=9823 GN=ODF2 PE=3 SV=1	ODF2	1	2.0385e-159	437.41	2	KIDSLMNAVGCLK(1)SEVK	-0.22037	1.57079	1.64752	2.70145	0.0472426	0.0229699	0.0100304
Biological Process	GO:0022607	5	cellular component assembly	1.21	0.00365843	A0A5G2QMG1	266	K	7.144	0.00692712	Up	CCT-beta OS=Sus scrofa OX=9823 GN=CCT2 PE=1 SV=1	CCT2	1	4.0407e-13	240.47	3	ILK(1)HGINCFINR	-0.77671	1.84459	1.01841	2.40026	0.405195	0.161584	0.16996
Biological Process	GO:0022607	5	cellular component assembly	1.21	0.00365843	A0A5G2QL25	221	K	14.803	0.00278011	Up	Carbonyl reductase 4 OS=Sus scrofa OX=9823 GN=CBR4 PE=1 SV=1	CBR4	1	2.75697e-51	328.81	2	EEHLK(1)SNIPLGR	-0.23108	1.36725	2.22287	2.0302	0.229968	0.0920606	0.0576579
Biological Process	GO:0022607	5	cellular component assembly	1.21	0.00365843	A0A5G2QL25	120	K	17.763	0.000753527	Up	Carbonyl reductase 4 OS=Sus scrofa OX=9823 GN=CBR4 PE=1 SV=1	CBR4	1	0.00589929	122.74	2	AAVK(1)TMIK	-0.46456	1.57132	1.90908	2.19983	0.175353	0.0641718	0.0802526
Biological Process	GO:0022607	5	cellular component assembly	1.21	0.00365843	A0A5G2RNC0	221	K	6.576	0.0247743	Up	Dynein regulatory complex subunit 4 OS=Sus scrofa OX=9823 GN=GAS8 PE=3 SV=1	GAS8	1	0.00538113	114.97	2	DK(1)HILLGAK	1.1228	1.01671	1.28508	2.23797	0.330475	0.129767
Biological Process	GO:0022607	5	cellular component assembly	1.21	0.00365843	A0A5G2RNC0	254	K	3.997	0.0374818	Up	Dynein regulatory complex subunit 4 OS=Sus scrofa OX=9823 GN=GAS8 PE=3 SV=1	GAS8	1	0.0133342	107.29	2	FIK(1)VQQER	0.22981	1.42711	1.1262	1.73194	0.528202	0.186551
Biological Process	GO:0022607	5	cellular component assembly	1.21	0.00365843	A0A5G2RNC0	20	K	7.507	0.00593474	Up	Dynein regulatory complex subunit 4 OS=Sus scrofa OX=9823 GN=GAS8 PE=3 SV=1	GAS8	1	7.61859e-08	192.24	3	VK(1)HLLYEHQNSLTEMK	0.12312	1.33392	1.05791	2.20036		0.211521	0.196287
Biological Process	GO:0022607	5	cellular component assembly	1.21	0.00365843	A0A5G2QE15	252	K	4.588	0.0173646	Up	Zona pellucida-binding protein 1 OS=Sus scrofa OX=9823 GN=ZPBP PE=3 SV=1	ZPBP	1	0.0116695	151.29	2	AK(1)NLIER	2.2462	1.12094	1.13883	2.66652	0.534322	0.318087	0.221299
Biological Process	GO:0022607	5	cellular component assembly	1.21	0.00365843	A0A5G2QE15	301	K	11.033	0.00106216	Up	Zona pellucida-binding protein 1 OS=Sus scrofa OX=9823 GN=ZPBP PE=3 SV=1	ZPBP	1	1.88261e-05	150.08	3	CFPGYGMNILK(1)HPK	-0.10836	1.30275	1.42516	2.77347	0.148631	0.134137	0.215851
Biological Process	GO:0022607	5	cellular component assembly	1.21	0.00365843	A0A5G2QE15	69	K	3.359	0.0367671	Up	Zona pellucida-binding protein 1 OS=Sus scrofa OX=9823 GN=ZPBP PE=3 SV=1	ZPBP	1	1.76238e-13	219.01	4	VYVMLHQK(1)SPHVLCVTQR	-0.073309	0.761124	1.33627	2.52613	0.531475	0.449453	0.395551
Biological Process	GO:0022607	5	cellular component assembly	1.21	0.00365843	A0A5G2QE15	142	K	9.701	0.0136603	Up	Zona pellucida-binding protein 1 OS=Sus scrofa OX=9823 GN=ZPBP PE=3 SV=1	ZPBP	1	5.77901e-95	383.43	3	PTVEEVVK(1)NLQLK	-0.14956	1.10704	1.24123	3.09106	0.344829	0.14542	0.0704291
Biological Process	GO:0022607	5	cellular component assembly	1.21	0.00365843	A0A5G2QE15	181	K	7.559	0.00827177	Up	Zona pellucida-binding protein 1 OS=Sus scrofa OX=9823 GN=ZPBP PE=3 SV=1	ZPBP	1	9.73512e-100	379.4	3	YHAAPCNSIYNISFEK(1)K	0.097152	1.51895	1.20442	2.5756	0.423639	0.145895	0.131506
Biological Process	GO:0022607	5	cellular component assembly	1.21	0.00365843	A0A5G2QGS5	189	K	7.57	0.00461557	Up	Acetyl-CoA acetyltransferase 1 OS=Sus scrofa OX=9823 GN=ACAT1 PE=1 SV=1	ACAT1	1	1.45144e-17	199.61	3	DGLTDVYNK(1)IHMGNCAENTAK	-0.045735	2.1555	2.01764		0.377836	0.183822	0.265202
Biological Process	GO:0022607	5	cellular component assembly	1.21	0.00365843	A0A5G2QGS5	244	K	12.716	0.000615442	Up	Acetyl-CoA acetyltransferase 1 OS=Sus scrofa OX=9823 GN=ACAT1 PE=1 SV=1	ACAT1	1	9.35826e-08	212.59	2	GK(1)PDTVVKEDEEYKR	-0.14921	1.5701	1.94238	2.05008	0.221611	0.121732	0.0940989
Biological Process	GO:0022607	5	cellular component assembly	1.21	0.00365843	A0A5G2QGS5	250	K	11.974	0.0032655	Up	Acetyl-CoA acetyltransferase 1 OS=Sus scrofa OX=9823 GN=ACAT1 PE=1 SV=1	ACAT1	1	8.23212e-40	308.74	2	GKPDTVVK(1)EDEEYKR	0.19203	1.50355	1.55256	1.68019	0.181169		0.0825359
Biological Process	GO:0022607	5	cellular component assembly	1.21	0.00365843	A0A5G2QGS5	267	K	12.183	0.0100254	Up	Acetyl-CoA acetyltransferase 1 OS=Sus scrofa OX=9823 GN=ACAT1 PE=1 SV=1	ACAT1	1	0.00533267	173.11	2	LK(1)TVFQK	0.48107	1.52684	1.38348	1.83026	0.198907		0.0605114
Biological Process	GO:0022607	5	cellular component assembly	1.21	0.00365843	A0A5G2QGS5	123	K	2.893	0.00648098	Up	Acetyl-CoA acetyltransferase 1 OS=Sus scrofa OX=9823 GN=ACAT1 PE=1 SV=1	ACAT1	1	4.41462e-10	151.42	3	QAVLGAGLPISTPCTTINK(1)VCASGMK	1.4209	1.05519	1.54805	1.46041	0.464522		0.471823
Biological Process	GO:0022607	5	cellular component assembly	1.21	0.00365843	A0A5G2QGS5	222	K	11.922	0.00257753	Up	Acetyl-CoA acetyltransferase 1 OS=Sus scrofa OX=9823 GN=ACAT1 PE=1 SV=1	ACAT1	1	0.0158276	91.085	2	SK(1)AAWEAGK	-0.74953	2.24838	2.19285		0.26981	0.14756	0.141401
Biological Process	GO:0022607	5	cellular component assembly	1.21	0.00365843	A0A5G2QGS5	262	K	25.223	0.000792457	Up	Acetyl-CoA acetyltransferase 1 OS=Sus scrofa OX=9823 GN=ACAT1 PE=1 SV=1	ACAT1	1	0.00402759	132.57	2	VDFNK(1)VPK	0.10583	1.23796	1.78037	1.85292		0.0781217	0.050632
Biological Process	GO:0022607	5	cellular component assembly	1.21	0.00365843	A0A5G2R446	381	K	3.173	0.0118014	Up	Chaperonin containing TCP1 subunit 6B OS=Sus scrofa OX=9823 GN=CCT6B PE=3 SV=1	CCT6B	1	2.12394e-19	261.87	3	GPNK(1)HTLTQIK	-0.57625	1.58003	1.0529	1.92917	0.681799	0.371904	0.384197
Biological Process	GO:0022607	5	cellular component assembly	1.21	0.00365843	A0A5G2R446	159	K	7.901	0.0213234	Up	Chaperonin containing TCP1 subunit 6B OS=Sus scrofa OX=9823 GN=CCT6B PE=3 SV=1	CCT6B	1	1.97093e-10	133.15	3	TSLQTK(1)VHPELANVLTETVVESVLAVR	0.26689	1.56977	0.723263	2.31792		0.197625	0.191422
Biological Process	GO:0022607	5	cellular component assembly	1.21	0.00365843	A0A5G2QHV4	383	K	13.353	0.00478197	Up	Sperm associated antigen 6 OS=Sus scrofa OX=9823 GN=SPAG6 PE=4 SV=1	SPAG6	1	0.000234419	196.86	2	AIK(1)NILQK	0.051531	1.18769	1.3385	3.05577	0.247093	0.0920181	0.0789303
Biological Process	GO:0022607	5	cellular component assembly	1.21	0.00365843	A0A5G2QHV4	241	K	7.032	0.00489301	Up	Sperm associated antigen 6 OS=Sus scrofa OX=9823 GN=SPAG6 PE=4 SV=1	SPAG6	1	0.0178538	119.17	2	DK(1)DEYVK	2.5852	1.21484	1.23394	2.11822	0.245345		0.187651
Biological Process	GO:0022607	5	cellular component assembly	1.21	0.00365843	A0A5G2QHV4	258	K	14.735	0.0123856	Up	Sperm associated antigen 6 OS=Sus scrofa OX=9823 GN=SPAG6 PE=4 SV=1	SPAG6	1	8.3393e-29	206	4	EIAK(1)HTPELSQLIVNAGGVAAVIDCIGSCK	-0.26782	1.02412	1.3687	2.39076	0.16095		0.0554727
Biological Process	GO:0022607	5	cellular component assembly	1.21	0.00365843	A0A5G2QHV4	435	K	6.85	0.00640272	Up	Sperm associated antigen 6 OS=Sus scrofa OX=9823 GN=SPAG6 PE=4 SV=1	SPAG6	1	0.00603121	99.802	2	LFVTSGGLK(1)K	-1.0103	1.17038	1.21713	2.84817	0.371769	0.201043	0.19151
Biological Process	GO:0022607	5	cellular component assembly	1.21	0.00365843	A0A5G2QSR2	56	K	5.021	0.00111427	Up	Hydroxysteroid 17-beta dehydrogenase 10 OS=Sus scrofa OX=9823 GN=HSD17B10 PE=1 SV=1	HSD17B10	1	5.29832e-99	380.13	2	LGK(1)SCAFAPADVTSEK	0.3684	1.39787	1.4795	2.1261	0.262432	0.309106	0.424988
Biological Process	GO:0022607	5	cellular component assembly	1.21	0.00365843	A0A5G2R4S9	19	K	10.605	0.00481189	Up	Septin 4 OS=Sus scrofa OX=9823 GN=SEPTIN4 PE=1 SV=1	SEPTIN4	1	0.000591062	97.081	3	FVK(1)DFPGSESYHQPEAK	0.24169	1.19162	1.14973	2.36291	0.140157	0.15558
Biological Process	GO:0022607	5	cellular component assembly	1.21	0.00365843	A0A5G2QSR2	52	K	6.364	0.000173841	Up	Hydroxysteroid 17-beta dehydrogenase 10 OS=Sus scrofa OX=9823 GN=HSD17B10 PE=1 SV=1	HSD17B10	1	4.0797e-28	228.6	3	LVGQGASAVLLDLPHSDGEAQAK(1)K	-0.44388	1.74864	1.47964	1.95696	0.333912	0.247394	0.23345
Biological Process	GO:0022607	5	cellular component assembly	1.21	0.00365843	A0A5G2QSR2	99	K	17.16	2.60789e-06	Up	Hydroxysteroid 17-beta dehydrogenase 10 OS=Sus scrofa OX=9823 GN=HSD17B10 PE=1 SV=1	HSD17B10	1	3.87487e-61	335.1	3	VDVAVNCAGIGVASK(1)TYNLK	2.7396	1.83568	2.10653	1.7274	0.117796	0.111137	0.101458
Biological Process	GO:0022607	5	cellular component assembly	1.21	0.00365843	F1RL08	358	K	7.145	0.00163302	Up	Tektin OS=Sus scrofa OX=9823 GN=TEKT5 PE=3 SV=2	TEKT5	1	0.000775515	131.5	2	VAEVTDIK(1)NK	-0.022901	1.84665	1.53205	1.88468	0.356771	0.14522	0.234628
Biological Process	GO:0022607	5	cellular component assembly	1.21	0.00365843	F1RRH7	183	K	6.593	0.0161645	Up	Radial spoke head component 9 OS=Sus scrofa OX=9823 GN=RSPH9 PE=4 SV=1	RSPH9	1	0.00591067	80.219	3	K(1)LSSYFHFR	-0.59268	2.04257	1.43065			0.306349	0.220429
Biological Process	GO:0022607	5	cellular component assembly	1.21	0.00365843	F1RUE0	17	K	62.725	3.63158e-06	Up	Acyl-CoA thioesterase 13 OS=Sus scrofa OX=9823 GN=ACOT13 PE=1 SV=2	ACOT13	1	0.000102791	171.36	2	LLGK(1)SSCFDR	-0.24855	1.84255	1.71739	2.3459	0.031943	0.0346195	0.0275915
Biological Process	GO:0022607	5	cellular component assembly	1.21	0.00365843	F1RVA0	80	K	6.423	0.018577	Up	Histone H3 OS=Sus scrofa OX=9823 GN=HIST1H3E PE=2 SV=2	HIST1H3E	1	0.000840393	126.31	2	EIAQDFK(1)TDLR	0.9597	1.58642	1.02517	2.58008	0.513999	0.181267	0.113072
Biological Process	GO:0022607	5	cellular component assembly	1.21	0.00365843	F1RVN1	64	K	22.816	0.00311879	Up	NADH dehydrogenase [ubiquinone] flavoprotein 1, mitochondrial OS=Sus scrofa OX=9823 GN=NDUFV1 PE=1 SV=1	NDUFV1	1	0.0256986	107.32	2	GDWYK(1)TK	-1.2543	1.36621	1.5577	1.93413	0.101496		0.0404539
Biological Process	GO:0022607	5	cellular component assembly	1.21	0.00365843	F1RVN1	81	K	18.898	0.000784892	Up	NADH dehydrogenase [ubiquinone] flavoprotein 1, mitochondrial OS=Sus scrofa OX=9823 GN=NDUFV1 PE=1 SV=1	NDUFV1	1	5.00855e-11	228.83	2	GPDWILGEVK(1)TSGLR	-0.77134	1.65934	1.45528	2.58386	0.159254	0.0778795	0.0644009
Biological Process	GO:0022607	5	cellular component assembly	1.21	0.00365843	F1RVN1	36	K	9.019	0.000805982	Up	NADH dehydrogenase [ubiquinone] flavoprotein 1, mitochondrial OS=Sus scrofa OX=9823 GN=NDUFV1 PE=1 SV=1	NDUFV1	1	0.00052747	133.23	2	TSFGSLK(1)DEDR	1.067	1.3623	2.21696	1.8219	0.281623	0.171924	0.145295
Biological Process	GO:0022607	5	cellular component assembly	1.21	0.00365843	F1RVN1	375	K	33.647	0.000165408	Up	NADH dehydrogenase [ubiquinone] flavoprotein 1, mitochondrial OS=Sus scrofa OX=9823 GN=NDUFV1 PE=1 SV=1	NDUFV1	1	3.36773e-55	329.82	3	LIEFYK(1)HESCGQCTPCR	0.42827	1.4877	1.58174	2.75739	0.0779735	0.0472453	0.0479577
Biological Process	GO:0022607	5	cellular component assembly	1.21	0.00365843	F1RVN1	104	K	6.803	0.000204978	Up	NADH dehydrogenase [ubiquinone] flavoprotein 1, mitochondrial OS=Sus scrofa OX=9823 GN=NDUFV1 PE=1 SV=1	NDUFV1	1	0.00127112	106.54	3	WSFMNK(1)PSDGRPK	1.0996	1.64667	1.86074	1.72364	0.333511	0.228345	0.207101
Biological Process	GO:0022607	5	cellular component assembly	1.21	0.00365843	F1RL08	270	K	8.594	0.000464421	Up	Tektin OS=Sus scrofa OX=9823 GN=TEKT5 PE=3 SV=2	TEKT5	1	3.32361e-50	322.99	2	NSAEFIDEK(1)CLNMR	-1.3461	1.65122	2.11514	1.60824	0.284189	0.148731	0.192469
Biological Process	GO:0022607	5	cellular component assembly	1.21	0.00365843	F1RZ80	479	K	5.708	0.0112579	Up	Coiled-coil domain containing 40 OS=Sus scrofa OX=9823 GN=CCDC40 PE=4 SV=3	CCDC40	1	0.00197711	103.69	2	EK(1)TNLVTHLSK	0.033761	1.18589	1.13165	2.78807	0.460059	0.224469	0.209868
Biological Process	GO:0022607	5	cellular component assembly	1.21	0.00365843	F1S598	62	K	12.497	0.0140818	Up	Coiled-coil domain containing 151 OS=Sus scrofa OX=9823 GN=ODAD3 PE=4 SV=4	ODAD3	1	4.16276e-32	270.95	3	AGPFHASEGK(1)STVHTQVAELQR	0.38218	1.20189	0.907229	2.63765	0.166442		0.0867836
Biological Process	GO:0022607	5	cellular component assembly	1.21	0.00365843	F1SAE4	266	K	9.925	0.00365451	Up	NME/NM23 family member 8 OS=Sus scrofa OX=9823 GN=NME8 PE=4 SV=4	NME8	1	1.49684e-27	280.55	2	HK(1)QDSLQEYMR	-1.6474	1.23207	1.65381	1.79942	0.206044		0.108654
Biological Process	GO:0022607	5	cellular component assembly	1.21	0.00365843	F1SAE4	99	K	4.822	0.0290064	Up	NME/NM23 family member 8 OS=Sus scrofa OX=9823 GN=NME8 PE=4 SV=4	NME8	1	0.000393236	138.26	2	IK(1)GANAPLVNQK	-0.54016	1.33893	1.08117	1.97261	0.43674		0.170543
Biological Process	GO:0022607	5	cellular component assembly	1.21	0.00365843	F1SAQ8	182	K	9.291	0.00236575	Up	Nucleoside-diphosphate kinase OS=Sus scrofa OX=9823 GN=AK7 PE=4 SV=3	AK7	1	4.96123e-06	180.27	3	K(1)HHPNFLDHINAEK	0.26996	1.99572	1.61558		0.199017		0.18968
Biological Process	GO:0022607	5	cellular component assembly	1.21	0.00365843	F1SDE8	261	K	2.24	0.0045704	Up	Tektin OS=Sus scrofa OX=9823 GN=TEKT3 PE=3 SV=2	TEKT3	1	0.00468186	109.21	2	DLSDK(1)QAAYR	-0.61587	1.41304	1.67492	1.05998	0.655688	0.583917	0.612457
Biological Process	GO:0022607	5	cellular component assembly	1.21	0.00365843	F1SDE8	57	K	14.24	0.000171441	Up	Tektin OS=Sus scrofa OX=9823 GN=TEKT3 PE=3 SV=2	TEKT3	1	2.45032e-21	145.43	3	PSTYYK(1)AASNWPALDPYCTR	0.25709	1.63762	1.70604	2.26264	0.17732	0.10149	0.114881
Biological Process	GO:0022607	5	cellular component assembly	1.21	0.00365843	F1SDE8	360	K	8.504	0.021205	Up	Tektin OS=Sus scrofa OX=9823 GN=TEKT3 PE=3 SV=2	TEKT3	1	0.00170209	129.56	2	NK(1)MQIHLAK	0.41011	0.946739	1.02788	2.66191	0.222667	0.140806
Biological Process	GO:0022607	5	cellular component assembly	1.21	0.00365843	F1SIS9	124	K	27.695	0.000396437	Up	NADH dehydrogenase [ubiquinone] 1 alpha subcomplex subunit 10, mitochondrial OS=Sus scrofa OX=9823 GN=NDUFA10 PE=1 SV=1	NDUFA10	1	2.74589e-14	251.24	3	FYDDPK(1)SNDGNSYR	0.13871	1.67405	1.59318	2.52368	0.110984	0.0495111	0.0486033
Biological Process	GO:0022607	5	cellular component assembly	1.21	0.00365843	F1SIS9	244	K	20.685	0.000713844	Up	NADH dehydrogenase [ubiquinone] 1 alpha subcomplex subunit 10, mitochondrial OS=Sus scrofa OX=9823 GN=NDUFA10 PE=1 SV=1	NDUFA10	1	7.78155e-31	293.62	3	ITAAYLQDIENAYK(1)K	-0.052699	1.59876	1.56935	1.67578	0.0995225		0.0565937
Biological Process	GO:0022607	5	cellular component assembly	1.21	0.00365843	F1S031	107	K	61.299	0.00288599	Up	NADH dehydrogenase [ubiquinone] iron-sulfur protein 6, mitochondrial OS=Sus scrofa OX=9823 GN=NDUFS6 PE=1 SV=1	NDUFS6	1	2.70981e-49	303.06	3	ETK(1)TGTCGYCGLQFR	-0.34597	1.59096	0.951411	2.40384	0.037162	0.0166309
Biological Process	GO:0022607	5	cellular component assembly	1.21	0.00365843	F1RL08	360	K	7.259	0.00732163	Up	Tektin OS=Sus scrofa OX=9823 GN=TEKT5 PE=3 SV=2	TEKT5	1	0.00426183	118.32	2	NK(1)LQTQLAK	-0.025812	1.77105		2.3727	0.40876	0.18832	0.259169
Biological Process	GO:0022607	5	cellular component assembly	1.21	0.00365843	F1RL08	131	K	18.975	0.000813372	Up	Tektin OS=Sus scrofa OX=9823 GN=TEKT5 PE=3 SV=2	TEKT5	1	0.000231685	185.6	2	LMQDK(1)DQLTR	-0.49052	1.33961	1.24701	3.11299	0.11414	0.0789179	0.107325
Biological Process	GO:0022607	5	cellular component assembly	1.21	0.00365843	F1RL08	178	K	12.01	0.00352015	Up	Tektin OS=Sus scrofa OX=9823 GN=TEKT5 PE=3 SV=2	TEKT5	1	4.10555e-38	300.98	2	LLNENHSLDSIK(1)R	-0.34729	1.29955	1.55179	2.68748	0.268616	0.10978	0.0827727
Biological Process	GO:0022607	5	cellular component assembly	1.21	0.00365843	F1SMN3	487	K	57.038	0.00154692	Up	Coiled-coil domain containing 136 OS=Sus scrofa OX=9823 GN=CCDC136 PE=1 SV=4	CCDC136	1	0.00142945	154.01	2	AQLQEVK(1)R	-0.48159	1.50572	1.72785	2.66305	0.0537132	0.0398576	0.00980928
Biological Process	GO:0022607	5	cellular component assembly	1.21	0.00365843	F1SMN3	408	K	16.519	0.00224379	Up	Coiled-coil domain containing 136 OS=Sus scrofa OX=9823 GN=CCDC136 PE=1 SV=4	CCDC136	1	1.36178e-49	317.31	2	ITK(1)SQVVESQSEK	0.29153	1.39493	1.10455	2.30656	0.0981356		0.0958267
Biological Process	GO:0022607	5	cellular component assembly	1.21	0.00365843	I3L859	320	K	3.071	0.0382213	Up	Coiled-coil domain containing 114 OS=Sus scrofa OX=9823 GN=ODAD1 PE=4 SV=3	ODAD1	1	0.00202155	120.54	2	GQLEALK(1)TAIQR	-0.21186	1.04303	1.15967	1.90557	0.566909	0.324823
Biological Process	GO:0022607	5	cellular component assembly	1.21	0.00365843	I3L859	136	K	5.867	0.0493244	Up	Coiled-coil domain containing 114 OS=Sus scrofa OX=9823 GN=ODAD1 PE=4 SV=3	ODAD1	1	0.025463	107.67	2	NK(1)ISMLR	-0.43983	1.08623		2.33126	0.317949		0.264565
Biological Process	GO:0022607	5	cellular component assembly	1.21	0.00365843	A0A5G2R1I5	233	K	12.309	0.000635486	Up	Lon protease homolog, mitochondrial OS=Sus scrofa OX=9823 GN=LONP1 PE=1 SV=1	LONP1	1	0.000843443	185.14	2	ALTAEIVK(1)TIR	0.14547	1.90962	1.95341	1.68614	0.21579	0.147572	0.0874739
Biological Process	GO:0022607	5	cellular component assembly	1.21	0.00365843	A0A5G2R1I5	433	K	12.872	0.00405564	Up	Lon protease homolog, mitochondrial OS=Sus scrofa OX=9823 GN=LONP1 PE=1 SV=1	LONP1	1	7.83635e-26	269.87	2	AQAVLEEDHYGMEDVK(1)K	0.37101	1.75023	1.0544	2.76284	0.235294	0.123958	0.0732731
Biological Process	GO:0022607	5	cellular component assembly	1.21	0.00365843	A0A5G2R1I5	349	K	7.737	0.0150619	Up	Lon protease homolog, mitochondrial OS=Sus scrofa OX=9823 GN=LONP1 PE=1 SV=1	LONP1	0.999999	3.18523e-39	297.53	2	ELGLEKDDK(1)DAIEEK	0.19502	1.59408	2.59392		0.437468	0.167028	0.207499
Biological Process	GO:0022607	5	cellular component assembly	1.21	0.00365843	A0A5G2R1I5	367	K	19.725	0.000919615	Up	Lon protease homolog, mitochondrial OS=Sus scrofa OX=9823 GN=LONP1 PE=1 SV=1	LONP1	1	1.58773e-10	171.26	2	ELVVPK(1)HVMDVVDEELSK	-1.0461	1.51199	1.98913	2.20938	0.164004	0.0709246	0.0545709
Biological Process	GO:0022607	5	cellular component assembly	1.21	0.00365843	A0A5G2R1I5	494	K	3.675	0.0415091	Up	Lon protease homolog, mitochondrial OS=Sus scrofa OX=9823 GN=LONP1 PE=1 SV=1	LONP1	1	0.00696848	67.416	3	FSVGGMTDVAEIK(1)GHR	0.1391	1.03396	0.956142	2.2422	0.418614	0.349078
Biological Process	GO:0022607	5	cellular component assembly	1.21	0.00365843	A0A5G2R1I5	81	K	16.178	0.000885131	Up	Lon protease homolog, mitochondrial OS=Sus scrofa OX=9823 GN=LONP1 PE=1 SV=1	LONP1	1	0.0237004	110.34	2	IVEVK(1)NK	-0.287	1.41406	1.33565	2.05241	0.113522	0.0843656
Biological Process	GO:0022607	5	cellular component assembly	1.21	0.00365843	A0A5G2R1I5	361	K	7.98	0.000137934	Up	Lon protease homolog, mitochondrial OS=Sus scrofa OX=9823 GN=LONP1 PE=1 SV=1	LONP1	1	0.00570025	123.16	2	LK(1)ELVVPK	-1.3533	1.51538	2.29023	1.52623	0.242717	0.209003	0.216434
Biological Process	GO:0022607	5	cellular component assembly	1.21	0.00365843	A0A5G2R1I5	516	K	33.836	0.00651283	Up	Lon protease homolog, mitochondrial OS=Sus scrofa OX=9823 GN=LONP1 PE=1 SV=1	LONP1	1	1.33668e-15	245.55	3	TK(1)TENPLVLIDEVDK	0.11434	1.08252	1.5821	2.23877	0.0750902		0.0215194
Biological Process	GO:0022607	5	cellular component assembly	1.21	0.00365843	A0A5G2R1T1	320	K	4.876	0.00819679	Up	Cysteine desulfurase, mitochondrial OS=Sus scrofa OX=9823 GN=NFS1 PE=1 SV=1	NFS1	1	8.44029e-22	192.25	4	SGTVPTPLVVGLGAACEVAQQEMEYDHK(1)R	0.1065	1.34936	1.32625	1.72304	0.39259	0.208761
Biological Process	GO:0022607	5	cellular component assembly	1.21	0.00365843	A0A5G2R2Y3	11	K	4.232	0.00895507	Up	Ubiquitin-like domain-containing protein OS=Sus scrofa OX=9823 GN=ELOB PE=1 SV=1	ELOB	1	1.08579e-13	255.11	2	HK(1)TTIFTDAK	0.78671	1.3539	1.32081	2.17842	0.521479	0.410882	0.214509
Biological Process	GO:0022607	5	cellular component assembly	1.21	0.00365843	F2Z536	43	K	3.702	0.0178742	Up	Dynein light chain OS=Sus scrofa OX=9823 GN=DYNLL2 PE=1 SV=1	DYNLL2	1	0.0220919	88.942	2	DIAAYIK(1)K	-0.21342	1.17901	1.09936	2.44545	0.618355	0.339526	0.318296
Biological Process	GO:0022607	5	cellular component assembly	1.21	0.00365843	D9U8D1	49	K	3.591	0.00079185	Up	Dynein light chain OS=Sus scrofa OX=9823 GN=DYNLL1 PE=1 SV=1	DYNLL1	1	4.66519e-09	234.9	3	K(1)YNPTWHCIVGR	0.378	1.43404	1.64325	1.61594	0.333093	0.528783	0.44489
Biological Process	GO:0022607	5	cellular component assembly	1.21	0.00365843	D9U8D1	9	K	24.408	0.00694407	Up	Dynein light chain OS=Sus scrofa OX=9823 GN=DYNLL1 PE=1 SV=1	DYNLL1	1	1.84054e-39	275.2	3	AVIK(1)NADMSEEMQQDSVECATQALEK	-0.66159	1.21488	0.916273	2.73591	0.084108	0.0488266
Biological Process	GO:0022607	5	cellular component assembly	1.21	0.00365843	D9U8D1	43	K	5.345	0.00818309	Up	Dynein light chain OS=Sus scrofa OX=9823 GN=DYNLL1 PE=1 SV=1	DYNLL1	1	0.0101084	107.66	2	DIAAHIK(1)K	0.63195	1.61044	0.872354	2.57155	0.260128	0.34158	0.343941
Biological Process	GO:0022607	5	cellular component assembly	1.21	0.00365843	D5K8A9	125	K	25.581	0.000750994	Up	Sperm acrosome membrane-associated protein 1 OS=Sus scrofa OX=9823 GN=SPACA1 PE=1 SV=1	SPACA1	1	7.48117e-69	347.6	2	GPVDCGWGK(1)PISENLESVR	-0.45778	1.68379	1.05455	3.03593	0.0971765	0.071138	0.0574145
Biological Process	GO:0022607	5	cellular component assembly	1.21	0.00365843	F1RGN9	21	K	14.005	0.0024957	Up	Tektin OS=Sus scrofa OX=9823 GN=TEKT1 PE=3 SV=3	TEKT1	1	1.13348e-07	184.21	4	FLPSEWHIANK(1)NHYHR	3.0697	1.30858	1.16773	3.12381	0.17672	0.139838	0.0833142
Biological Process	GO:0022607	5	cellular component assembly	1.21	0.00365843	F1RL08	217	K	17.03	0.000614138	Up	Tektin OS=Sus scrofa OX=9823 GN=TEKT5 PE=3 SV=2	TEKT5	1	3.30367e-08	203.85	2	IGIDLVHDNVEK(1)NLIR	-0.1456	1.87348	1.88001	1.91374	0.18035	0.0861082	0.0663156
Biological Process	GO:0022607	5	cellular component assembly	1.21	0.00365843	A0A5G2QSR2	9	K	5.724	0.0479807	Up	Hydroxysteroid 17-beta dehydrogenase 10 OS=Sus scrofa OX=9823 GN=HSD17B10 PE=1 SV=1	HSD17B10	1	3.52068e-07	127.28	3	SVK(1)GLVAIITGGASGLGLATAER	-0.36315	1.72462	2.12685	0.626924		0.30895	0.21266
Biological Process	GO:0022607	5	cellular component assembly	1.21	0.00365843	A0A5G2QGK1	58	K	6.046	0.00924907	Up	Tubulin beta chain OS=Sus scrofa OX=9823 GN=TUBB4B PE=1 SV=1	TUBB4B	1	7.08926e-52	319.37	2	INVYYNEATGGK(1)YVPR	0.44775	1.49518	1.33768	2.31564	0.514004	0.16492	0.172565
Biological Process	GO:0022607	5	cellular component assembly	1.21	0.00365843	A0A5G2Q9J9	153	K	24.524	0.00175499	Up	Spermatogenesis associated 6 OS=Sus scrofa OX=9823 GN=SPATA6 PE=3 SV=1	SPATA6	1	4.0287e-05	128.95	3	FTYHTAPVEK(1)SHSR	1.6748	1.60234	1.69285	1.57248	0.0404371	0.0918881
Biological Process	GO:0022607	5	cellular component assembly	1.21	0.00365843	A0A5G2QGD4	63	K	50.235	0.000127425	Up	Complex I-B17 OS=Sus scrofa OX=9823 GN=NDUFB6 PE=1 SV=1	NDUFB6	1	0.00750474	119.41	2	NVIYK(1)TYR	-0.15257	1.83957	1.33555	1.75939		0.0292825	0.0362037
Biological Process	GO:0022607	5	cellular component assembly	1.21	0.00365843	F1RGJ3	103	K	11.674	0.000554202	Up	75 kDa glucose-regulated protein OS=Sus scrofa OX=9823 GN=HSPA9 PE=1 SV=4	HSPA9	1	0.00366077	135.77	2	DIK(1)NVPFK	-0.13971	1.84553	1.40896	2.27208	0.22742	0.124924	0.121079
Biological Process	GO:0022607	5	cellular component assembly	1.21	0.00365843	F1RGJ3	152	K	52.474	0.00416047	Up	75 kDa glucose-regulated protein OS=Sus scrofa OX=9823 GN=HSPA9 PE=1 SV=4	HSPA9	1	3.62472e-28	202.58	3	ETAENYLGHTAK(1)NAVITVPAYFNDSQR	0.42335	2.27947	1.75055	1.85778	0.00592061	0.0636331	0.0426508
Biological Process	GO:0022607	5	cellular component assembly	1.21	0.00365843	F1RGJ3	265	K	8.848	0.0299604	Up	75 kDa glucose-regulated protein OS=Sus scrofa OX=9823 GN=HSPA9 PE=1 SV=4	HSPA9	1	5.92944e-40	300.89	2	ETGVDLTK(1)DNMALQR	0.62539		2.3975	1.19631	0.232798	0.173394
Biological Process	GO:0022607	5	cellular component assembly	1.21	0.00365843	F1RGJ3	565	K	2.784	0.0234855	Up	75 kDa glucose-regulated protein OS=Sus scrofa OX=9823 GN=HSPA9 PE=1 SV=4	HSPA9	1	4.39771e-22	266.74	2	MEEFK(1)DQLPADECNK	-0.50561	1.52088	1.67694	1.21671	0.403246	0.323382	0.858834
Biological Process	GO:0022607	5	cellular component assembly	1.21	0.00365843	F1RGJ3	359	K	14.007	0.000623636	Up	75 kDa glucose-regulated protein OS=Sus scrofa OX=9823 GN=HSPA9 PE=1 SV=4	HSPA9	1	1.58999e-39	315.13	3	MPK(1)VQQTVQDLFGR	-1.6914	1.28822	2.07194	2.24002	0.194017	0.102187	0.103616
Biological Process	GO:0022607	5	cellular component assembly	1.21	0.00365843	F1RGJ3	100	K	4.15	0.00213714	Up	75 kDa glucose-regulated protein OS=Sus scrofa OX=9823 GN=HSPA9 PE=1 SV=4	HSPA9	1	1.1409e-12	247.13	2	YDDPEVQK(1)DIK	-0.21289	1.5036	2.20524	1.12609	0.380212	0.410039	0.374822
Biological Process	GO:0022607	5	cellular component assembly	1.21	0.00365843	A0A287ADL8	40	K	3.084	0.0118465	Up	26S proteasome non-ATPase regulatory subunit 4 OS=Sus scrofa OX=9823 GN=PSMD4 PE=1 SV=1	PSMD4	1	9.66604e-05	112.3	3	LQAQQDAVNIVCHSK(1)TR	0.51545	1.4005	1.44008	1.27062	0.564019		0.324795
Biological Process	GO:0022607	5	cellular component assembly	1.21	0.00365843	A0A287AE88	256	K	18.833	0.000103074	Up	NADH:ubiquinone oxidoreductase subunit A9 OS=Sus scrofa OX=9823 GN=NDUFA9 PE=1 SV=1	NDUFA9	1	4.43616e-05	203.29	2	GK(1)TFAFVGPNR	1.7123	1.58854	1.74365	2.36528	0.132125	0.0818969	0.0885017
Biological Process	GO:0022607	5	cellular component assembly	1.21	0.00365843	A0A287AE88	170	K	11.943	0.000431517	Up	NADH:ubiquinone oxidoreductase subunit A9 OS=Sus scrofa OX=9823 GN=NDUFA9 PE=1 SV=1	NDUFA9	1	5.20566e-52	323.68	2	LIHISHLNADIK(1)SPSR	-0.093474	2.32598	1.43745	1.77301	0.134029	0.214387	0.115148
Biological Process	GO:0022607	5	cellular component assembly	1.21	0.00365843	F1RGJ3	528	K	11.325	0.00310874	Up	75 kDa glucose-regulated protein OS=Sus scrofa OX=9823 GN=HSPA9 PE=1 SV=4	HSPA9	1	0.00111548	126.67	2	DDIENMVK(1)NAEK	0.33125	1.77736	1.80728	1.92855	0.292841	0.0729111	0.121052
Biological Process	GO:0022607	5	cellular component assembly	1.21	0.00365843	A0A287AFA5	161	K	5.03	0.0161286	Up	Endoplasmin OS=Sus scrofa OX=9823 GN=HSP90B1 PE=1 SV=2	HSP90B1	1	0.000982117	128.81	2	EELVK(1)NLGTIAK	-0.10306	1.89461	1.08547	2.02485	0.607132	0.173314	0.214624
Biological Process	GO:0022607	5	cellular component assembly	1.21	0.00365843	A0A287AFA5	404	K	5.561	0.0366143	Up	Endoplasmin OS=Sus scrofa OX=9823 GN=HSP90B1 PE=1 SV=2	HSP90B1	1	0.00809394	93.178	2	GLFDEYGSK(1)K	1.0208	1.22351	1.1815	2.05971	0.414974	0.120304
Biological Process	GO:0022607	5	cellular component assembly	1.21	0.00365843	A0A287AFA5	95	K	3.428	0.0476647	Up	Endoplasmin OS=Sus scrofa OX=9823 GN=HSP90B1 PE=1 SV=2	HSP90B1	1	0.00275132	117.76	2	LIINSLYK(1)NK	0.18698	1.50037	0.777425	1.90813	0.464465		0.349604
Biological Process	GO:0022607	5	cellular component assembly	1.21	0.00365843	A0A287AFJ1	427	K	9.92	0.0027271	Up	Glutamine synthetase OS=Sus scrofa OX=9823 GN=GLUL PE=1 SV=1	GLUL	1	3.95046e-05	163.65	2	AYDPK(1)GGLDNAR	0.34881	2.00942	1.28014	2.161	0.307847	0.107117	0.13447
Biological Process	GO:0022607	5	cellular component assembly	1.21	0.00365843	A0A287AFJ1	59	K	7.425	0.00135029	Up	Glutamine synthetase OS=Sus scrofa OX=9823 GN=GLUL PE=1 SV=1	GLUL	1	9.68841e-06	138.05	3	IK(1)SLTHQPSYSCSSR	-0.35705	1.69603	1.21179	2.37999	0.31582	0.190291	0.206072
Biological Process	GO:0022607	5	cellular component assembly	1.21	0.00365843	A0A287AFJ1	395	K	9.373	0.00660517	Up	Glutamine synthetase OS=Sus scrofa OX=9823 GN=GLUL PE=1 SV=1	GLUL	1	1.58707e-18	214.69	3	PIPGNWNGAGCHTNFSTK(1)AMR	-0.068915	1.72254	1.41828	2.28075	0.38077	0.0965322	0.101135
Biological Process	GO:0022607	5	cellular component assembly	1.21	0.00365843	A0A5G2QYG2	413	K	5.103	0.00764194	Up	Nucleoporin 58 OS=Sus scrofa OX=9823 GN=NUP58 PE=4 SV=1	NUP58	1	0.000182205	148.52	2	VLK(1)EQYLGYR	0.42838	1.378	1.04873	1.99551	0.313232		0.264535
Biological Process	GO:0022607	5	cellular component assembly	1.21	0.00365843	A0A287B0P6	41	K	5.081	0.000674307	Up	Calreticulin OS=Sus scrofa OX=9823 GN=CALR PE=1 SV=1	CALR	0.993084	0.0150434	65.563	3	WIESK(0.993)HK(0.007)PDFGR	1.1768	1.38967	1.61244	2.01127	0.417015	0.303237	0.266366
Biological Process	GO:0022607	5	cellular component assembly	1.21	0.00365843	A0A287AKY1	366	K	13.984	0.00392011	Up	cAMP-dependent protein kinase type I-alpha regulatory subunit OS=Sus scrofa OX=9823 GN=PRKAR1A PE=3 SV=1	PRKAR1A	1	0.000170996	139.96	2	VLGPCSDILK(1)R	-0.28903	1.92824	1.39351	2.27782	0.258562	0.0841795	0.0576848
Biological Process	GO:0022607	5	cellular component assembly	1.21	0.00365843	A0A287ALA1	147	K	8.784	0.0438312	Up	SERPIN domain-containing protein OS=Sus scrofa OX=9823 GN=LOC100621494 PE=3 SV=2	LOC100621494	1	0.010873	132.96	2	FLDNVK(1)R	-1.4851	1.32517	1.64557	2.41603	0.0198123	0.288057	0.305359
Biological Process	GO:0022607	5	cellular component assembly	1.21	0.00365843	A0A287AFA5	142	K	12.337	0.00138007	Up	Endoplasmin OS=Sus scrofa OX=9823 GN=HSP90B1 PE=1 SV=2	HSP90B1	1	3.49105e-11	223.72	3	EK(1)NLLHVTDTGVGMTR	0.47898	1.90262		1.79746		0.136624	0.16329
Biological Process	GO:0022607	5	cellular component assembly	1.21	0.00365843	F1RGJ3	325	K	9.782	0.00189365	Up	75 kDa glucose-regulated protein OS=Sus scrofa OX=9823 GN=HSPA9 PE=1 SV=4	HSPA9	1	8.55518e-14	247.96	2	AQFEGIVTDLIK(1)R	-0.53534	1.69373	1.5587	2.19108	0.170457	0.287189	0.0988414
Biological Process	GO:0022607	5	cellular component assembly	1.21	0.00365843	F1RGJ3	342	K	34.837	0.000302745	Up	75 kDa glucose-regulated protein OS=Sus scrofa OX=9823 GN=HSPA9 PE=1 SV=4	HSPA9	1	1.18894e-41	296.16	3	AMQDAEVSK(1)SDIGEVILVGGMTR	2.9905	1.29141	2.63377	1.9074	0.0674407	0.0657922	0.034192
Biological Process	GO:0022607	5	cellular component assembly	1.21	0.00365843	F1RP25	93	K	15.51	0.00162477	Up	Citramalyl-CoA lyase OS=Sus scrofa OX=9823 GN=CLYBL PE=1 SV=4	CLYBL	1	1.08957e-06	187.76	2	IVK(1)TLEDFDLGPTEK	0.73393	1.54992	2.37619	1.71048	0.191328	0.0568636	0.115222
Biological Process	GO:0022607	5	cellular component assembly	1.21	0.00365843	A0A287A3S5	419	K	12.806	0.0108239	Up	Tektin OS=Sus scrofa OX=9823 GN=TEKT4 PE=3 SV=1	TEKT4	1	1.51407e-13	244.01	2	DLAVK(1)TNSLFINR	0.09173	1.44813	0.916578	2.38787	0.166523	0.0808966
Biological Process	GO:0022607	5	cellular component assembly	1.21	0.00365843	A0A287A3S5	218	K	9.461	0.00358398	Up	Tektin OS=Sus scrofa OX=9823 GN=TEKT4 PE=3 SV=1	TEKT4	1	4.44431e-46	282.6	3	ETCEMGWSDK(1)VEAYNIDEACCR	-1.1944	1.23857	1.19597	2.23634	0.158491		0.170628
Biological Process	GO:0022607	5	cellular component assembly	1.21	0.00365843	A0A287A3S5	317	K	13.716	0.00143311	Up	Tektin OS=Sus scrofa OX=9823 GN=TEKT4 PE=3 SV=1	TEKT4	1	0.000430341	164.71	2	HK(1)LEYHLR	-1.5191	1.39365	1.46817	2.73045	0.206355	0.115789	0.0855747
Biological Process	GO:0022607	5	cellular component assembly	1.21	0.00365843	A0A287A3S5	191	K	6.292	0.000312484	Up	Tektin OS=Sus scrofa OX=9823 GN=TEKT4 PE=3 SV=1	TEKT4	1	0.00256796	138.54	2	NIQELLK(1)R	0.21348	1.69283	1.60921	1.87512	0.363587	0.225203	0.234053
Biological Process	GO:0022607	5	cellular component assembly	1.21	0.00365843	A0A287A3S5	114	K	23.948	0.00108972	Up	Tektin OS=Sus scrofa OX=9823 GN=TEKT4 PE=3 SV=1	TEKT4	1	7.33063e-68	336.37	2	VGEHLQDTHCWK(1)SELQR	-0.44875	1.65227	1.18144	2.92579	0.119775	0.0472285	0.073495
Biological Process	GO:0022607	5	cellular component assembly	1.21	0.00365843	A0A287A4I2	128	K	5.34	0.00205054	Up	Radial spoke head component 1 OS=Sus scrofa OX=9823 GN=RSPH1 PE=4 SV=2	RSPH1	1	0.000161275	146.79	2	FLNK(1)NPVGPGK	0.52202	1.4233	1.6029	2.02743	0.460834	0.256954	0.228574
Biological Process	GO:0022607	5	cellular component assembly	1.21	0.00365843	A0A287A4I2	135	K	6.629	0.00206297	Up	Radial spoke head component 1 OS=Sus scrofa OX=9823 GN=RSPH1 PE=4 SV=2	RSPH1	1	7.45686e-21	222.06	3	NPVGPGK(1)YVFDIGCEQHGEYR	-0.43577	1.85322	1.26773	2.09254	0.38313	0.222722	0.180661
Biological Process	GO:0022607	5	cellular component assembly	1.21	0.00365843	A0A287A4I2	38	K	10.558	0.0037319	Up	Radial spoke head component 1 OS=Sus scrofa OX=9823 GN=RSPH1 PE=4 SV=2	RSPH1	1	4.43029e-39	311.71	3	K(1)HGQGTFIYPDGSR	0.39587	1.59499	1.043	2.84287	0.26844	0.127124	0.123578
Biological Process	GO:0022607	5	cellular component assembly	1.21	0.00365843	A0A287A4I2	35	K	12.396	0.00411583	Up	Radial spoke head component 1 OS=Sus scrofa OX=9823 GN=RSPH1 PE=4 SV=2	RSPH1	1	0.00054582	143.12	2	YIGEYVK(1)NK	0.10335	1.30571	1.32682	2.91957	0.259379	0.103955	0.0845625
Biological Process	GO:0022607	5	cellular component assembly	1.21	0.00365843	A0A287A4I2	105	K	3.477	0.00839303	Up	Radial spoke head component 1 OS=Sus scrofa OX=9823 GN=RSPH1 PE=4 SV=2	RSPH1	1	7.67174e-32	264.92	3	YVGTWVK(1)GQQEGAAELIHLNHR	0.22136	1.50107	1.11414	2.04448	0.590065	0.44394	0.306301
Biological Process	GO:0022607	5	cellular component assembly	1.21	0.00365843	A0A287BNN0	943	K	27.417	0.00200897	Up	Coiled-coil domain containing 88A OS=Sus scrofa OX=9823 GN=CCDC88A PE=1 SV=2	CCDC88A	0.98591	0.0263334	40.937	4	LK(0.986)EQYQQLDITSTK(0.014)LNNQCELLSQLK	1.8641	2.2522	0.72164	2.81501	0.0882417	0.0683799	0.0545223
Biological Process	GO:0022607	5	cellular component assembly	1.21	0.00365843	A0A287A4Z2	122	K	12.103	0.00052399	Up	Superoxide dismutase OS=Sus scrofa OX=9823 GN=SOD2 PE=1 SV=2	SOD2	1	0.000532854	141.39	2	GELLEAIK(1)R	-0.11682	1.32529	1.94315	2.27366	0.213671	0.120471	0.123755
Biological Process	GO:0022607	5	cellular component assembly	1.21	0.00365843	A0A287A4Z2	68	K	5.991	0.0229553	Up	Superoxide dismutase OS=Sus scrofa OX=9823 GN=SOD2 PE=1 SV=2	SOD2	1	1.16914e-19	193.27	3	HHAAYVNNLNVVEEK(1)YQEALK(1)K	-0.17281	1.24042	1.30213	2.59918	0.0936406	0.284549	0.480087
Biological Process	GO:0022607	5	cellular component assembly	1.21	0.00365843	A0A287A4Z2	74	K	12.163	8.03885e-05	Up	Superoxide dismutase OS=Sus scrofa OX=9823 GN=SOD2 PE=1 SV=2	SOD2	1	1.16914e-19	193.27	2	YQEALK(1)K	-0.51462	1.71226	1.63501	2.19689	0.118425	0.178052	0.159358
Biological Process	GO:0022607	5	cellular component assembly	1.21	0.00365843	I3LAJ9	151	K	2.556	0.019653	Up	Histone H2B OS=Sus scrofa OX=9823 PE=3 SV=2	--	1	3.48601e-07	153.09	2	LLLPGELAK(1)HAVSEGTK	-0.085375	1.19734	1.21048	1.5578	0.63848	0.395909
Biological Process	GO:0022607	5	cellular component assembly	1.21	0.00365843	A0A287BG49	306	K	4.488	0.000917961	Up	Short-chain-specific acyl-CoA dehydrogenase, mitochondrial OS=Sus scrofa OX=9823 GN=ACADS PE=1 SV=1	ACADS	1	1.05069e-06	184.9	2	AFGVPLTK(1)LQGIQFK	0.43514	1.23489	1.93169	1.74005	0.440723	0.314058	0.338591
Biological Process	GO:0022607	5	cellular component assembly	1.21	0.00365843	A0A287BG49	262	K	4.285	0.00455088	Up	Short-chain-specific acyl-CoA dehydrogenase, mitochondrial OS=Sus scrofa OX=9823 GN=ACADS PE=1 SV=1	ACADS	1	3.87505e-06	127.05	3	ENLLGEPGMGFK(1)IAMQTLDMGR	-0.66191	1.29993	1.86584	1.161		0.325755	0.34748
Biological Process	GO:0022607	5	cellular component assembly	1.21	0.00365843	A0A287BG49	389	K	21.088	0.000102548	Up	Short-chain-specific acyl-CoA dehydrogenase, mitochondrial OS=Sus scrofa OX=9823 GN=ACADS PE=1 SV=1	ACADS	1	2.78967e-06	218.47	3	LVIAGHLLK(1)SYRS	-0.41221	2.50745	1.61607	1.60484	0.0999544	0.0686739	0.103011
Biological Process	GO:0022607	5	cellular component assembly	1.21	0.00365843	A0A287BG49	208	K	3.749	0.0205058	Up	Short-chain-specific acyl-CoA dehydrogenase, mitochondrial OS=Sus scrofa OX=9823 GN=ACADS PE=1 SV=1	ACADS	1	3.98706e-07	125.04	3	SLQNK(1)GISAFLVPMPTPGLTLGK	-0.1081	1.34448	1.75932	1.14127	0.501996	0.252937
Biological Process	GO:0022607	5	cellular component assembly	1.21	0.00365843	A0A287AAR5	151	K	4.303	0.00791817	Up	Acyl carrier protein OS=Sus scrofa OX=9823 GN=NDUFAB1 PE=1 SV=1	NDUFAB1	1	1.20085e-08	156.69	2	LMCPQEIVDYIADK(1)K	-0.18078	1.46521	1.78049		0.344468	0.40983
Biological Process	GO:0022607	5	cellular component assembly	1.21	0.00365843	F1RP25	58	K	14.081	0.000649008	Up	Citramalyl-CoA lyase OS=Sus scrofa OX=9823 GN=CLYBL PE=1 SV=4	CLYBL	1	0.000163275	161.63	2	AVLYVPGNDEK(1)K	-0.30383	1.76891	1.86799	1.96524	0.213961	0.0928073	0.0910959
Biological Process	GO:0022607	5	cellular component assembly	1.21	0.00365843	A0A287ALA1	98	K	7.028	0.0259984	Up	SERPIN domain-containing protein OS=Sus scrofa OX=9823 GN=LOC100621494 PE=3 SV=2	LOC100621494	1	0.00242999	99.34	3	K(1)PPMAEIHK	-2.2758	1.22188		2.27985		0.2429	0.255374
Biological Process	GO:0022607	5	cellular component assembly	1.21	0.00365843	A0A5G2Q729	7	K	3.058	0.00774284	Up	Complex I-B16.6 OS=Sus scrofa OX=9823 GN=NDUFA13 PE=1 SV=1	NDUFA13	1	7.35761e-11	196.11	3	VK(1)QDMPPPGGYGPIDYK	0.13243	1.06478	1.53727	1.503	0.496041		0.39891
Biological Process	GO:0022607	5	cellular component assembly	1.21	0.00365843	A0A287ALA1	277	K	4.887	0.00233587	Up	SERPIN domain-containing protein OS=Sus scrofa OX=9823 GN=LOC100621494 PE=3 SV=2	LOC100621494	1	0.0110739	144.83	2	LEWLEK(1)K	-0.13866	1.22164	1.36809	1.81012		0.275613	0.324538
Biological Process	GO:0022607	5	cellular component assembly	1.21	0.00365843	A0A287AMZ2	370	K	3.812	0.00299412	Up	T-complex protein 1 subunit gamma OS=Sus scrofa OX=9823 GN=CCT3 PE=1 SV=1	CCT3	1	0.000104946	143.03	2	DPK(1)ACTILLR	-1.0475	1.51827	1.294	1.94094	0.545615	0.402771	0.298404
Biological Process	GO:0022607	5	cellular component assembly	1.21	0.00365843	A0A287BAW0	40	K	23.209	0.000223693	Up	Complex I subunit B13 OS=Sus scrofa OX=9823 GN=NDUFA5 PE=1 SV=2	NDUFA5	1	1.49116e-15	244.01	3	ILDVLGQIPK(1)NAAYR	0.10273	1.90851	1.39317	2.45047	0.109183	0.0570353	0.0816245
Biological Process	GO:0022607	5	cellular component assembly	1.21	0.00365843	A0A287BAW0	30	K	14.001	0.00158262	Up	Complex I subunit B13 OS=Sus scrofa OX=9823 GN=NDUFA5 PE=1 SV=2	NDUFA5	1	8.21132e-07	176.05	3	ILYTK(1)ILDVLGQIPK	-0.13674	1.35887	1.2812	2.95994	0.186344	0.0905577	0.123084
Biological Process	GO:0022607	5	cellular component assembly	1.21	0.00365843	A0A287BAW0	25	K	11.411	0.000579019	Up	Complex I subunit B13 OS=Sus scrofa OX=9823 GN=NDUFA5 PE=1 SV=2	NDUFA5	1	0.0141982	139.68	2	LK(1)ILYTK	0.1959	1.70624	1.72492	2.08539	0.227365	0.0985259	0.157565
Biological Process	GO:0022607	5	cellular component assembly	1.21	0.00365843	A0A287BAW0	98	K	8.538	0.000394955	Up	Complex I subunit B13 OS=Sus scrofa OX=9823 GN=NDUFA5 PE=1 SV=2	NDUFA5	1	1.67471e-10	187.44	2	WK(1)PWEPLVEEPPANQWK	-0.046323	1.78748	1.86392	1.71954	0.297039	0.176695	0.155322
Biological Process	GO:0022607	5	cellular component assembly	1.21	0.00365843	A0A287BAZ8	321	K	16.9	0.000473841	Up	Lysine ketoglutarate reductase OS=Sus scrofa OX=9823 GN=AASS PE=1 SV=2	AASS	1	6.86637e-43	307.32	2	TDGVYDPIEYDK(1)HPER	0.59106	1.64167	1.35089	2.67225	0.152804	0.0847786	0.097612
Biological Process	GO:0022607	5	cellular component assembly	1.21	0.00365843	A0A287BAZ8	23	K	6.542	1.21191e-05	Up	Lysine ketoglutarate reductase OS=Sus scrofa OX=9823 GN=AASS PE=1 SV=2	AASS	1	0.000821172	112.75	2	LHHK(1)AVMALR	-0.24322	1.82443	1.67046	1.70957	0.269504	0.292608	0.233424
Biological Process	GO:0022607	5	cellular component assembly	1.21	0.00365843	F1SDP3	386	K	8.259	0.000759347	Up	Ornithine--oxo-acid aminotransferase OS=Sus scrofa OX=9823 GN=OAT PE=1 SV=1	OAT	1	0.00780743	107.69	2	ETK(1)DYDAWK	2.0124	1.39692	1.90862	1.32102		0.188119	0.185328
Biological Process	GO:0022607	5	cellular component assembly	1.21	0.00365843	F1SDP3	374	K	8.834	0.0014252	Up	Ornithine--oxo-acid aminotransferase OS=Sus scrofa OX=9823 GN=OAT PE=1 SV=1	OAT	1	0.00262914	114.39	2	GK(1)GLLNAIVIR	0.26321	1.6876	1.26714	2.43515	0.289764	0.146662	0.173688
Biological Process	GO:0022607	5	cellular component assembly	1.21	0.00365843	F1SDP3	66	K	9.737	0.000244457	Up	Ornithine--oxo-acid aminotransferase OS=Sus scrofa OX=9823 GN=OAT PE=1 SV=1	OAT	1	8.22479e-05	146.17	2	GK(1)GVYVWDVEGR	-1.5302	1.90029	1.42554	2.11535	0.235097	0.143977	0.179746
Biological Process	GO:0022607	5	cellular component assembly	1.21	0.00365843	A0A287B9W3	2862	K	12.185	0.0151568	Up	Cytoplasmic dynein 1 heavy chain 1(predicted) OS=Sus scrofa OX=9823 GN=DYNC1H1 PE=1 SV=2	DYNC1H1	1	0.0221965	83.753	2	HFPNIDK(1)EK	0.034155	1.12423	0.939017	2.67739	0.171405	0.0879639
Biological Process	GO:0022607	5	cellular component assembly	1.21	0.00365843	A0A5G2R3M8	312	K	8.162	0.00097681	Up	Insulin degrading enzyme OS=Sus scrofa OX=9823 GN=IDE PE=1 SV=1	IDE	1	0.00052403	134.75	2	SK(1)GWVNTLVGGQK	0.31266	1.56036	1.65169	2.13306	0.240776	0.133249	0.280866
Biological Process	GO:0022607	5	cellular component assembly	1.21	0.00365843	F1RVJ8	304	K	6.423	0.0189962	Up	Armadillo repeat containing 4 OS=Sus scrofa OX=9823 GN=ODAD2 PE=4 SV=3	ODAD2	1	0.000546996	175.49	2	EK(1)SAVFSENMSK	-0.15641	1.51775	0.688228	2.98573	0.356283	0.229028	0.222982
Biological Process	GO:0022607	5	cellular component assembly	1.21	0.00365843	F1RVJ8	115	K	15.114	0.00315431	Up	Armadillo repeat containing 4 OS=Sus scrofa OX=9823 GN=ODAD2 PE=4 SV=3	ODAD2	1	0.000290204	164.77	2	LLFIAK(1)NTK	0.63575	1.35757	1.19159	3.0785	0.204272	0.0727326	0.0953359
Biological Process	GO:0022607	5	cellular component assembly	1.21	0.00365843	F1RVJ8	944	K	14.346	0.0289831	Up	Armadillo repeat containing 4 OS=Sus scrofa OX=9823 GN=ODAD2 PE=4 SV=3	ODAD2	1	3.50162e-13	250.12	2	YLK(1)SSDTNVHR	0.21758		1.36239	2.37696	0.17732		0.08333
Biological Process	GO:0022607	5	cellular component assembly	1.21	0.00365843	A0A287BLW4	45	K	17.095	0.000282352	Up	Nucleoporin 205 OS=Sus scrofa OX=9823 GN=NUP205 PE=1 SV=1	NUP205	0.999856	0.00017956	132.32	2	K(1)HKPDFISLFR	-0.30391	1.39374	1.44881	1.96978	0.0965572		0.091111
Biological Process	GO:0022607	5	cellular component assembly	1.21	0.00365843	A0A5G2RC01	243	K	14.604	0.00030976	Up	Medium-chain specific acyl-CoA dehydrogenase, mitochondrial OS=Sus scrofa OX=9823 GN=ACADM PE=3 SV=1	ACADM	1	8.82099e-144	415.89	3	IAMGTFDK(1)TRPPVAAGAVGLAQR	1.2901	2.08446	1.85368	1.67733	0.190413	0.100478	0.0936366
Biological Process	GO:0022607	5	cellular component assembly	1.21	0.00365843	A0A5G2RC01	176	K	8.651	0.00162495	Up	Medium-chain specific acyl-CoA dehydrogenase, mitochondrial OS=Sus scrofa OX=9823 GN=ACADM PE=3 SV=1	ACADM	1	0.00284261	113.1	2	SDPDPK(1)APASK	0.071299	1.48828	1.81528	1.33867	0.216984		0.140773
Biological Process	GO:0022607	5	cellular component assembly	1.21	0.00365843	A0A5G2RC01	275	K	5.077	0.00642079	Up	Medium-chain specific acyl-CoA dehydrogenase, mitochondrial OS=Sus scrofa OX=9823 GN=ACADM PE=3 SV=1	ACADM	1	4.62663e-12	172.91	3	TFGK(1)LLAEHQGISFLLADMAMK	0.1381	1.35397	1.237	1.82866	0.360993		0.219378
Biological Process	GO:0022607	5	cellular component assembly	1.21	0.00365843	A0A2C9F352	125	K	11.291	0.000120753	Up	Dehydrogenase/reductase SDR family member 4 OS=Sus scrofa OX=9823 GN=DHRS4 PE=1 SV=1	DHRS4	1	0.0159149	84.743	2	AVVPEMEK(1)R	-0.61269	1.82822	1.58888	2.09474	0.208726	0.127688	0.151751
Biological Process	GO:0022607	5	cellular component assembly	1.21	0.00365843	A0A2C9F352	183	K	24.465	0.000243465	Up	Dehydrogenase/reductase SDR family member 4 OS=Sus scrofa OX=9823 GN=DHRS4 PE=1 SV=1	DHRS4	1	7.80348e-17	188.19	3	VNCLAPGLIK(1)TNFSQVLWMDK	-1.3069	1.70833	2.0143	2.04176	0.120027	0.0650694	0.050521
Biological Process	GO:0022607	5	cellular component assembly	1.21	0.00365843	F1RZR6	147	K	12.253	0.000392729	Up	CutA divalent cation tolerance homolog OS=Sus scrofa OX=9823 GN=CUTA PE=1 SV=2	CUTA	0.999999	1.34328e-08	124.03	3	GKIEEDSEVLMMIK(1)TQSSLVPALTDFVR	-0.01535	1.67633	1.26948	1.79618		0.12322	0.134793
Biological Process	GO:0022607	5	cellular component assembly	1.21	0.00365843	F1SK15	269	K	8.095	0.00138476	Up	Methylcrotonoyl-CoA carboxylase 2 OS=Sus scrofa OX=9823 GN=MCCC2 PE=1 SV=3	MCCC2	1	2.88828e-05	112.55	4	K(1)SGVSDYYALDDNHALHLVR	1.2163	1.19658	1.89434	1.52862	0.203764		0.176699
Biological Process	GO:0022607	5	cellular component assembly	1.21	0.00365843	A0A287B5Q7	139	K	3.371	0.0258222	Up	26S proteasome non-ATPase regulatory subunit 8 OS=Sus scrofa OX=9823 GN=PSMD8 PE=1 SV=1	PSMD8	1	0.00848571	98.233	2	LTK(1)QQLILAR	0.3639	1.53278	1.14704	1.94746	0.797879	0.252435	0.322412
Biological Process	GO:0022607	5	cellular component assembly	1.21	0.00365843	A0A287B5J3	76	K	6.685	0.0207492	Up	Dynein axonemal light chain 1 OS=Sus scrofa OX=9823 GN=DNAL1 PE=4 SV=2	DNAL1	1	0.0224542	103.29	2	GIHVMK(1)K	-0.023259	1.30811	1.29997	1.93853	0.342586		0.110808
Biological Process	GO:0022607	5	cellular component assembly	1.21	0.00365843	A0A287AMZ2	78	K	1.959	0.0267903	Up	T-complex protein 1 subunit gamma OS=Sus scrofa OX=9823 GN=CCT3 PE=1 SV=1	CCT3	1	1.74998e-33	281.07	2	EIQVQHPAAK(1)SMIEISR	-0.21739	1.34264	1.24855	1.38106	0.942289	0.461669	0.623799
Biological Process	GO:0022607	5	cellular component assembly	1.21	0.00365843	A0A287AMZ2	222	K	1.942	0.00615858	Up	T-complex protein 1 subunit gamma OS=Sus scrofa OX=9823 GN=CCT3 PE=1 SV=1	CCT3	1	8.37135e-14	255.11	3	GVMINK(1)DVTHPR	-0.93869	1.27605	1.43661	1.24805	0.843198	0.561538	0.634549
Biological Process	GO:0022607	5	cellular component assembly	1.21	0.00365843	A0A287AMZ2	248	K	2.681	0.00445418	Up	T-complex protein 1 subunit gamma OS=Sus scrofa OX=9823 GN=CCT3 PE=1 SV=1	CCT3	1	4.58239e-05	145.34	2	IVLLDSSLEYK(1)K	-1.2557	1.46646	1.09054	1.44726		0.509769	0.485978
Biological Process	GO:0022607	5	cellular component assembly	1.21	0.00365843	A0A287ANI6	48	K	6.106	0.00207926	Up	Hydroxymethylglutaryl-CoA lyase OS=Sus scrofa OX=9823 GN=HMGCL PE=1 SV=2	HMGCL	1	2.62413e-22	271.32	3	DGLQNEK(1)NIIPTPTK	-0.073686	2.60163	1.39746	1.15652	0.281633	0.293286	0.26947
Biological Process	GO:0022607	5	cellular component assembly	1.21	0.00365843	F1SHD7	87	K	11.487	0.00193298	Up	NADH-ubiquinone oxidoreductase 75 kDa subunit, mitochondrial OS=Sus scrofa OX=9823 GN=NDUFS1 PE=1 SV=4	NDUFS1	1	5.26838e-05	177.57	2	APK(1)VVAACAMPVMK	0.41895	1.69066	1.4873	2.34153	0.257129	0.084565	0.138823
Biological Process	GO:0022607	5	cellular component assembly	1.21	0.00365843	F1SHD7	607	K	14.873	0.00225518	Up	NADH-ubiquinone oxidoreductase 75 kDa subunit, mitochondrial OS=Sus scrofa OX=9823 GN=NDUFS1 PE=1 SV=4	NDUFS1	1	1.45438e-06	155.88	2	AQQTK(1)VAVTPPGLAR	0.40313	1.62194	1.08315	2.91692	0.196252	0.0863795	0.0953633
Biological Process	GO:0022607	5	cellular component assembly	1.21	0.00365843	F1SHD7	562	K	12.02	0.000279519	Up	NADH-ubiquinone oxidoreductase 75 kDa subunit, mitochondrial OS=Sus scrofa OX=9823 GN=NDUFS1 PE=1 SV=4	NDUFS1	1	2.53758e-06	87.842	4	QDLPK(1)DCFIIYQGHHGDVGAPMADVILPGAAYTEK	0.21254	1.45309	1.72306	1.56112	0.11241		0.150324
Biological Process	GO:0022607	5	cellular component assembly	1.21	0.00365843	A0A287AS93	20	K	18.852	0.00278364	Up	Complex I-B12 OS=Sus scrofa OX=9823 GN=NDUFB3 PE=1 SV=1	NDUFB3	1	0.000489868	166.16	2	MELPDYK(1)QWK	0.63237	1.39567	2.59377	1.70832	0.194113	0.0467674	0.0613533
Biological Process	GO:0022607	5	cellular component assembly	1.21	0.00365843	A0A287AUN6	211	K	7.175	0.00728864	Up	WD_REPEATS_REGION domain-containing protein OS=Sus scrofa OX=9823 GN=SPAG16 PE=4 SV=2	SPAG16	1	0.0241427	82.452	2	LINDLK(1)GLK	0.18539	1.92039		2.21504	0.429662	0.240148	0.194754
Biological Process	GO:0022607	5	cellular component assembly	1.21	0.00365843	A9XFX6	159	K	7.937	0.017856	Up	F-actin-capping protein subunit beta OS=Sus scrofa OX=9823 GN=CAPZB PE=1 SV=1	CAPZB	1	2.34292e-83	366.06	3	GCWDSIHVVEVQEK(1)SSGR	0.065553	1.16559	0.92852	3.23454	0.403242	0.13419	0.133914
Biological Process	GO:0022607	5	cellular component assembly	1.21	0.00365843	A9XFX6	145	K	3.771	0.0125673	Up	F-actin-capping protein subunit beta OS=Sus scrofa OX=9823 GN=CAPZB PE=1 SV=1	CAPZB	1	1.42725e-30	286.44	2	IK(1)GCWDSIHVVEVQEK	-0.74371	1.25663	1.31686	2.16901	0.634392	0.368098	0.25502
Biological Process	GO:0022607	5	cellular component assembly	1.21	0.00365843	A9XFX6	267	K	4.439	0.0294121	Up	F-actin-capping protein subunit beta OS=Sus scrofa OX=9823 GN=CAPZB PE=1 SV=1	CAPZB	1	0.000489962	142.04	2	NDLVEALK(1)R	-0.15858	1.17798	1.58141	2.1375	0.753606	0.165956	0.183553
Biological Process	GO:0022607	5	cellular component assembly	1.21	0.00365843	A9XFX6	259	K	16.911	0.0203154	Up	F-actin-capping protein subunit beta OS=Sus scrofa OX=9823 GN=CAPZB PE=1 SV=1	CAPZB	1	3.12342e-20	270.02	2	QEALK(1)NDLVEALK	1.84	1.06953		3.5231	0.231398	0.079257	0.0967152
Biological Process	GO:0022607	5	cellular component assembly	1.21	0.00365843	A9XFX6	199	K	13.447	0.00116206	Up	F-actin-capping protein subunit beta OS=Sus scrofa OX=9823 GN=CAPZB PE=1 SV=1	CAPZB	1	7.86636e-19	218.37	3	QMEK(1)DETVSDCSPHIANIGR	0.38689	1.95377	1.03783	2.5931	0.18119	0.112256	0.121857
Biological Process	GO:0022607	5	cellular component assembly	1.21	0.00365843	A9XFX6	235	K	12.663	0.00437094	Up	F-actin-capping protein subunit beta OS=Sus scrofa OX=9823 GN=CAPZB PE=1 SV=1	CAPZB	1	0.000155519	187.22	2	STLNEIYFGK(1)TK	-1.774	1.63841	1.43617	2.48628	0.282965	0.0687836	0.0873977
Biological Process	GO:0022607	5	cellular component assembly	1.21	0.00365843	A9XFX6	57	K	18.648	0.0071384	Up	F-actin-capping protein subunit beta OS=Sus scrofa OX=9823 GN=CAPZB PE=1 SV=1	CAPZB	1	3.06746e-05	179.19	2	VVGK(1)DYLLCDYNR	0.0019842	1.2653	1.24495	3.18438	0.217646	0.0436046	0.0441186
Biological Process	GO:0022607	5	cellular component assembly	1.21	0.00365843	A0A5G2QIN8	319	K	4.487	0.0246806	Up	Aldehyde dehydrogenase 5 family member A1 OS=Sus scrofa OX=9823 GN=ALDH5A1 PE=1 SV=1	ALDH5A1	1	0.000868422	136.27	3	GIHDSFVK(1)K	-0.54088	2.18467	1.08874	1.63303	0.168477	0.68968	0.235411
Biological Process	GO:0022607	5	cellular component assembly	1.21	0.00365843	A0A5G2QIN8	355	K	10.103	0.000216434	Up	Aldehyde dehydrogenase 5 family member A1 OS=Sus scrofa OX=9823 GN=ALDH5A1 PE=1 SV=1	ALDH5A1	1	0.000385609	124.6	2	VEK(1)HVIDAISK	-0.22712	1.99215	1.67125	1.79619	0.242916	0.164325	0.133176
Biological Process	GO:0022607	5	cellular component assembly	1.21	0.00365843	F1RFQ6	26	K	2.474	0.0318711	Up	Syntaxin 2 OS=Sus scrofa OX=9823 GN=STX2 PE=3 SV=3	STX2	1	0.00320831	111.46	2	IAQYVEEVK(1)K	-0.06172	1.15312	1.34715	1.77272	0.916301	0.400289	0.41042
Biological Process	GO:0022607	5	cellular component assembly	1.21	0.00365843	F1RMH1	480	K	5.173	0.00300815	Up	Cilia and flagella associated protein 100 OS=Sus scrofa OX=9823 GN=CFAP100 PE=4 SV=3	CFAP100	1	0.0167248	58.268	3	VFHFGEYK(1)GDQEDK	-0.54691	2.16364	1.17086	1.69357	0.448759	0.245719	0.277444
Biological Process	GO:0022607	5	cellular component assembly	1.21	0.00365843	A0A287B3T4	133	K	6.735	0.00885957	Up	Theg spermatid protein OS=Sus scrofa OX=9823 GN=THEG PE=4 SV=2	THEG	1	0.000725075	141.02	2	PK(1)TNWQVLK	-0.28338	1.60808	1.21244	2.40384	0.469238	0.147675	0.158733
Biological Process	GO:0022607	5	cellular component assembly	1.21	0.00365843	A0A287ALA1	27	K	4.374	0.00891247	Up	SERPIN domain-containing protein OS=Sus scrofa OX=9823 GN=LOC100621494 PE=3 SV=2	LOC100621494	0.999965	0.0220143	60.064	3	SK(1)PAIYKPPR	-1.0138	1.03819	1.38571	1.91481		0.36056	0.300738
Biological Process	GO:0042407	9	cristae formation	2.09	0.00232596	F1RPS8	247	K	11.878	0.00410941	Up	ATP synthase subunit alpha OS=Sus scrofa OX=9823 GN=ATP5F1A PE=1 SV=3	ATP5F1A	1	4.16252e-05	198.73	2	STVAQLVK(1)R	0.1271		1.95336	2.48603	0.278668	0.154268	0.127669
Biological Process	GO:0120031	7	plasma membrane bounded cell projection assembly	1.45	0.003581	F1SDE8	261	K	2.24	0.0045704	Up	Tektin OS=Sus scrofa OX=9823 GN=TEKT3 PE=3 SV=2	TEKT3	1	0.00468186	109.21	2	DLSDK(1)QAAYR	-0.61587	1.41304	1.67492	1.05998	0.655688	0.583917	0.612457
Biological Process	GO:0120031	7	plasma membrane bounded cell projection assembly	1.45	0.003581	F1SAE4	99	K	4.822	0.0290064	Up	NME/NM23 family member 8 OS=Sus scrofa OX=9823 GN=NME8 PE=4 SV=4	NME8	1	0.000393236	138.26	2	IK(1)GANAPLVNQK	-0.54016	1.33893	1.08117	1.97261	0.43674		0.170543
Biological Process	GO:0033875	9	ribonucleoside bisphosphate metabolic process	1.72	0.00299346	A0A5G2R718	170	K	11.034	0.000616898	Up	Pyruvate dehydrogenase E1 component subunit beta OS=Sus scrofa OX=9823 GN=PDHB PE=1 SV=1	PDHB	1	0.00690861	120.65	2	GLIK(1)SAIR	-0.50635	1.84458	1.33623	2.32059	0.233349	0.133349	0.131903
Biological Process	GO:0033875	9	ribonucleoside bisphosphate metabolic process	1.72	0.00299346	A0A5G2R718	240	K	6.879	0.0205121	Up	Pyruvate dehydrogenase E1 component subunit beta OS=Sus scrofa OX=9823 GN=PDHB PE=1 SV=1	PDHB	1	2.61644e-25	205.84	4	PVGHCLEAATVLSK(1)EGIECEVINMR	-0.21928	1.99621	1.82199	0.740027	0.215947		0.22583
Biological Process	GO:0033875	9	ribonucleoside bisphosphate metabolic process	1.72	0.00299346	A0A5G2R718	166	K	14.707	0.00444135	Up	Pyruvate dehydrogenase E1 component subunit beta OS=Sus scrofa OX=9823 GN=PDHB PE=1 SV=1	PDHB	1	8.42777e-07	162.68	3	VVSPWSSEDAK(1)GLIK	-0.13568	1.72959		2.80764	0.214388	0.151972	0.0964119
Biological Process	GO:0033875	9	ribonucleoside bisphosphate metabolic process	1.72	0.00299346	F1RPU8	19	K	17.711	0.000499448	Up	Mitochondrial pyruvate carrier OS=Sus scrofa OX=9823 GN=MPC2 PE=1 SV=4	MPC2	1	0.000269522	140.24	2	VLDK(1)VELLLPEK	-0.36674	1.5011	1.40448	2.77375	0.136634	0.108465	0.0755768
Biological Process	GO:0033875	9	ribonucleoside bisphosphate metabolic process	1.72	0.00299346	I3LCI2	244	K	14.326	7.06486e-05	Up	Pyruvate dehydrogenase E1 component subunit alpha OS=Sus scrofa OX=9823 GN=PDHA1 PE=1 SV=2	PDHA1	1	0.000402517	172.21	2	AAASTDYYK(1)R	0.24715	2.1465	1.89941	1.56258	0.162102	0.104595	0.124807
Biological Process	GO:0033875	9	ribonucleoside bisphosphate metabolic process	1.72	0.00299346	I3LCI2	83	K	2.468	0.0111998	Up	Pyruvate dehydrogenase E1 component subunit alpha OS=Sus scrofa OX=9823 GN=PDHA1 PE=1 SV=2	PDHA1	1	2.11455e-13	245.15	3	RMELK(1)ADQLYK(1)QK	-0.75819	1.26937	1.80276	1.19758	0.410631	0.633634	0.686031
Biological Process	GO:0033875	9	ribonucleoside bisphosphate metabolic process	1.72	0.00299346	I3LCI2	85	K	9.005	0.000162366	Up	Pyruvate dehydrogenase E1 component subunit alpha OS=Sus scrofa OX=9823 GN=PDHA1 PE=1 SV=2	PDHA1	1	0.000436708	138.22	2	ADQLYK(1)QK(1)IIR	-0.94509	1.44813	1.61689	2.33528	0.182028	0.226178	0.19149
Biological Process	GO:0033875	9	ribonucleoside bisphosphate metabolic process	1.72	0.00299346	I3LCI2	149	K	30.357	0.00264492	Up	Pyruvate dehydrogenase E1 component subunit alpha OS=Sus scrofa OX=9823 GN=PDHA1 PE=1 SV=2	PDHA1	1	0.000497327	166.66	2	GK(1)GGSMHMYAK	-0.26957	1.20887	1.1745	2.50919		0.0416124	0.0658308
Biological Process	GO:0033875	9	ribonucleoside bisphosphate metabolic process	1.72	0.00299346	I3LCI2	77	K	7.793	0.000756203	Up	Pyruvate dehydrogenase E1 component subunit alpha OS=Sus scrofa OX=9823 GN=PDHA1 PE=1 SV=2	PDHA1	1	2.11455e-13	245.15	3	RMELK(1)ADQLYK(1)QK	-0.75819	1.64932	1.96265	1.70571	0.290556	0.25052	0.141251
Biological Process	GO:0033875	9	ribonucleoside bisphosphate metabolic process	1.72	0.00299346	A0A5G2R718	336	K	25.703	0.000583753	Up	Pyruvate dehydrogenase E1 component subunit beta OS=Sus scrofa OX=9823 GN=PDHB PE=1 SV=1	PDHB	1	0.0255332	92.307	3	ILEDNSVPQVK(1)DIIFAIK(1)K	0.31701	1.47854	1.75327	2.5435	0.122807	0.0521125	0.0497732
Biological Process	GO:0033875	9	ribonucleoside bisphosphate metabolic process	1.72	0.00299346	I3LCI2	321	K	7.822	0.000142572	Up	Pyruvate dehydrogenase E1 component subunit alpha OS=Sus scrofa OX=9823 GN=PDHA1 PE=1 SV=2	PDHA1	1	7.16903e-05	200.93	2	SK(1)SDPIMLLK(1)DR	-0.73938	1.52532	2.28207	1.51246	0.220389	0.247774	0.211984
Biological Process	GO:0033875	9	ribonucleoside bisphosphate metabolic process	1.72	0.00299346	I3LCI2	313	K	13.059	0.000364323	Up	Pyruvate dehydrogenase E1 component subunit alpha OS=Sus scrofa OX=9823 GN=PDHA1 PE=1 SV=2	PDHA1	1	4.7682e-05	200.93	2	SK(1)SDPIMLLK(1)DR	-0.73938	1.98833	2.05998	1.5249	0.20686	0.115592	0.104335
Biological Process	GO:0033875	9	ribonucleoside bisphosphate metabolic process	1.72	0.00299346	D2D0E6	151	K	8.729	0.00142869	Up	Malonyl-CoA decarboxylase OS=Sus scrofa OX=9823 GN=MLYCD PE=4 SV=1	MLYCD	1	0.0136598	61.657	3	SLFHHISK(1)LDGGVR	-2.578	1.93742	1.65143			0.209281	0.201865
Biological Process	GO:0033875	9	ribonucleoside bisphosphate metabolic process	1.72	0.00299346	F1RS43	434	K	10.198	0.000278666	Up	3-oxoacyl-[acyl-carrier-protein] synthase, mitochondrial OS=Sus scrofa OX=9823 GN=OXSM PE=3 SV=3	OXSM	1	0.0255005	92.653	2	AQEWK(1)TEK	-0.0062196	1.6265	1.57715	1.48955	0.1764		0.130397
Biological Process	GO:0033875	9	ribonucleoside bisphosphate metabolic process	1.72	0.00299346	F1RUE0	17	K	62.725	3.63158e-06	Up	Acyl-CoA thioesterase 13 OS=Sus scrofa OX=9823 GN=ACOT13 PE=1 SV=2	ACOT13	1	0.000102791	171.36	2	LLGK(1)SSCFDR	-0.24855	1.84255	1.71739	2.3459	0.031943	0.0346195	0.0275915
Biological Process	GO:0033875	9	ribonucleoside bisphosphate metabolic process	1.72	0.00299346	F1S0N2	583	K	3.294	0.0244049	Up	ATP-citrate synthase OS=Sus scrofa OX=9823 GN=ACLY PE=1 SV=3	ACLY	1	0.000677883	116.01	2	EILIPVFK(1)NMADAMK	-0.50779	1.11378	1.39725	2.09167	0.774168	0.293825	0.329308
Biological Process	GO:0033875	9	ribonucleoside bisphosphate metabolic process	1.72	0.00299346	F1S0N2	272	K	2.689	0.0397425	Up	ATP-citrate synthase OS=Sus scrofa OX=9823 GN=ACLY PE=1 SV=3	ACLY	1	0.00125457	134.81	2	LTLLNPK(1)GR	-0.21039	1.65104	0.884292	1.47144		0.413896	0.57933
Biological Process	GO:0033875	9	ribonucleoside bisphosphate metabolic process	1.72	0.00299346	F1S0N2	569	K	2.762	0.00634585	Up	ATP-citrate synthase OS=Sus scrofa OX=9823 GN=ACLY PE=1 SV=3	ACLY	1	0.0264778	47.574	3	QK(1)FYWGHK	-0.55299	1.63555	1.21061	1.18156		0.448414	0.52386
Biological Process	GO:0034032	9	purine nucleoside bisphosphate metabolic process	1.72	0.00299346	A0A286ZVQ0	42	K	3.93	0.000258842	Up	Acyl-coenzyme A thioesterase 2, mitochondrial(predicted) OS=Sus scrofa OX=9823 GN=ACOT4 PE=1 SV=2	ACOT4	1	0.0040599	132.29	2	DEK(1)GALFR	0.73605	1.49139	1.92941	1.36218	0.416795	0.425315	0.374918
Biological Process	GO:0034032	9	purine nucleoside bisphosphate metabolic process	1.72	0.00299346	A0A286ZVQ0	348	K	9.941	0.000305548	Up	Acyl-coenzyme A thioesterase 2, mitochondrial(predicted) OS=Sus scrofa OX=9823 GN=ACOT4 PE=1 SV=2	ACOT4	1	0.00776261	100.02	2	EK(1)PQIICYPR	-1.2976	1.40495	1.8454	2.20123	0.239424	0.159295	0.149697
Biological Process	GO:0033875	9	ribonucleoside bisphosphate metabolic process	1.72	0.00299346	I3LCI2	277	K	5.209	0.00236988	Up	Pyruvate dehydrogenase E1 component subunit alpha OS=Sus scrofa OX=9823 GN=PDHA1 PE=1 SV=2	PDHA1	1	2.82417e-14	251.03	2	SGK(1)GPILMELQTYR	2.0211	1.31828	1.80506	1.30939		0.244799	0.322474
Biological Process	GO:0033875	9	ribonucleoside bisphosphate metabolic process	1.72	0.00299346	A0A5G2R718	50	K	6.433	0.000338382	Up	Pyruvate dehydrogenase E1 component subunit beta OS=Sus scrofa OX=9823 GN=PDHB PE=1 SV=1	PDHB	1	2.1295e-55	321.67	3	VFLLGEEVAQYDGAYK(1)VSR	-0.11923	1.30726	1.5305	1.69276	0.241922	0.227567
Biological Process	GO:0033875	9	ribonucleoside bisphosphate metabolic process	1.72	0.00299346	A0A5G2R718	34	K	6.023	0.0316931	Up	Pyruvate dehydrogenase E1 component subunit beta OS=Sus scrofa OX=9823 GN=PDHB PE=1 SV=1	PDHB	1	1.04594e-20	167.61	4	DAINQGMDEELERDEK(1)VFLLGEEVAQYDGAYK	-0.31808	1.03207	2.48971	0.97998	0.326682		0.171565
Biological Process	GO:0033875	9	ribonucleoside bisphosphate metabolic process	1.72	0.00299346	A0A5G2QSG9	170	K	7.66	0.00876038	Up	Dihydrolipoamide acetyltransferase component of pyruvate dehydrogenase complex OS=Sus scrofa OX=9823 GN=PDHX PE=1 SV=1	PDHX	1	0.00244504	75.533	3	PSVPPPPSPQPQISTPVK(1)K	0.24889		2.09625	1.44186	0.238889		0.223003
Biological Process	GO:0033875	9	ribonucleoside bisphosphate metabolic process	1.72	0.00299346	A0A5G2QGS5	123	K	2.893	0.00648098	Up	Acetyl-CoA acetyltransferase 1 OS=Sus scrofa OX=9823 GN=ACAT1 PE=1 SV=1	ACAT1	1	4.41462e-10	151.42	3	QAVLGAGLPISTPCTTINK(1)VCASGMK	1.4209	1.05519	1.54805	1.46041	0.464522		0.471823
Biological Process	GO:0033875	9	ribonucleoside bisphosphate metabolic process	1.72	0.00299346	A0A5G2QGS5	222	K	11.922	0.00257753	Up	Acetyl-CoA acetyltransferase 1 OS=Sus scrofa OX=9823 GN=ACAT1 PE=1 SV=1	ACAT1	1	0.0158276	91.085	2	SK(1)AAWEAGK	-0.74953	2.24838	2.19285		0.26981	0.14756	0.141401
Biological Process	GO:0033875	9	ribonucleoside bisphosphate metabolic process	1.72	0.00299346	A0A5G2QGS5	262	K	25.223	0.000792457	Up	Acetyl-CoA acetyltransferase 1 OS=Sus scrofa OX=9823 GN=ACAT1 PE=1 SV=1	ACAT1	1	0.00402759	132.57	2	VDFNK(1)VPK	0.10583	1.23796	1.78037	1.85292		0.0781217	0.050632
Biological Process	GO:0033875	9	ribonucleoside bisphosphate metabolic process	1.72	0.00299346	A0A5G2QIE6	270	K	8.54	0.0212944	Up	Acetyltransferase component of pyruvate dehydrogenase complex OS=Sus scrofa OX=9823 GN=DLAT PE=1 SV=1	DLAT	1	4.7975e-11	229.29	2	GIDLTQIK(1)GTGPDGR	-0.11319	1.09551	1.33998	2.20244	0.27587	0.0862052
Biological Process	GO:0033875	9	ribonucleoside bisphosphate metabolic process	1.72	0.00299346	A0A5G2QIE6	367	K	18.394	2.74021e-05	Up	Acetyltransferase component of pyruvate dehydrogenase complex OS=Sus scrofa OX=9823 GN=DLAT PE=1 SV=1	DLAT	1	6.71423e-05	143.4	2	SK(1)ISVNDFIIK	0.035448	1.45822	2.10129	2.13112	0.0930524	0.105726	0.110598
Biological Process	GO:0033875	9	ribonucleoside bisphosphate metabolic process	1.72	0.00299346	A0A5S6FV10	132	K	5.587	4.02744e-06	Up	Dihydrolipoyllysine-residue succinyltransferase component of 2-oxoglutarate dehydrogenase complex, mitochondrial OS=Sus scrofa OX=9823 GN=DLST PE=3 SV=1	DLST	1	0.0311311	72.434	2	AK(1)PAEAPAAAAPK	-1.0013	1.58949	1.85452	1.64508	0.311255	0.295046	0.304612
Biological Process	GO:0033875	9	ribonucleoside bisphosphate metabolic process	1.72	0.00299346	A0A5G2QPK6	58	K	14.471	0.00105459	Up	Dihydrolipoyl dehydrogenase OS=Sus scrofa OX=9823 GN=DLD PE=1 SV=1	DLD	1	6.98919e-05	196.48	2	AAQLGFK(1)TVCIEK	0.0011054	1.63951	1.56697	2.40569	0.205739	0.0759641	0.106127
Biological Process	GO:0033875	9	ribonucleoside bisphosphate metabolic process	1.72	0.00299346	A0A5G2QPK6	96	K	7.669	0.00101237	Up	Dihydrolipoyl dehydrogenase OS=Sus scrofa OX=9823 GN=DLD PE=1 SV=1	DLD	1	6.69026e-49	313.04	4	ALLNNSHYYHMAHGK(1)DFASR	0.81498	1.90275	1.34769	2.05746	0.18081	0.180116	0.331169
Biological Process	GO:0033875	9	ribonucleoside bisphosphate metabolic process	1.72	0.00299346	A0A5G2QPK6	135	K	2.712	0.0179189	Up	Dihydrolipoyl dehydrogenase OS=Sus scrofa OX=9823 GN=DLD PE=1 SV=1	DLD	1	2.83008e-140	407.16	3	SNAVK(1)ALTGGIAHLFK(1)QNK	-0.511	1.39969	1.94509	1.03871	0.37931	0.71524	0.52196
Biological Process	GO:0033875	9	ribonucleoside bisphosphate metabolic process	1.72	0.00299346	A0A5G2QPK6	409	K	4.416	0.00806848	Up	Dihydrolipoyl dehydrogenase OS=Sus scrofa OX=9823 GN=DLD PE=1 SV=1	DLD	1	9.81057e-41	315.21	2	EEGIEYK(1)VGK	0.0090722	1.65767	1.73328	1.50127	0.597975	0.312334	0.197473
Biological Process	GO:0033875	9	ribonucleoside bisphosphate metabolic process	1.72	0.00299346	A0A5G2QPK6	269	K	10.152	0.000750656	Up	Dihydrolipoyl dehydrogenase OS=Sus scrofa OX=9823 GN=DLD PE=1 SV=1	DLD	1	0.00021351	178.55	2	LNTK(1)VIGATK	-0.50256	1.41263	1.84138	2.20799	0.246217	0.175624	0.11616
Biological Process	GO:0033875	9	ribonucleoside bisphosphate metabolic process	1.72	0.00299346	A0A5G2QPK6	338	K	5.662	0.00569049	Up	Dihydrolipoyl dehydrogenase OS=Sus scrofa OX=9823 GN=DLD PE=1 SV=1	DLD	1	2.12613e-09	154.65	3	FQTK(1)IPNIYAIGDVVAGPMLAHK	-0.4543	1.04519	1.32725	2.7269	0.242605	0.311758	0.346298
Biological Process	GO:0033875	9	ribonucleoside bisphosphate metabolic process	1.72	0.00299346	A0A5G2QPK6	259	K	4.306	0.00171738	Up	Dihydrolipoyl dehydrogenase OS=Sus scrofa OX=9823 GN=DLD PE=1 SV=1	DLD	1	0.000942284	135.83	2	ILQK(1)QGFK(1)FK	-0.29711	1.38859	1.8666	1.61407	0.515362	0.282005	0.333363
Biological Process	GO:0033875	9	ribonucleoside bisphosphate metabolic process	1.72	0.00299346	A0A5G2QPK6	151	K	12.703	0.000528701	Up	Dihydrolipoyl dehydrogenase OS=Sus scrofa OX=9823 GN=DLD PE=1 SV=1	DLD	1	5.05413e-10	201.61	3	ITGK(1)NQVTATK(1)ADGSTEVINTK	0.16389	1.75435	1.80692	2.00089	0.222108	0.0946223	0.121115
Biological Process	GO:0033875	9	ribonucleoside bisphosphate metabolic process	1.72	0.00299346	A0A5G2QPK6	158	K	21.78	0.00019812	Up	Dihydrolipoyl dehydrogenase OS=Sus scrofa OX=9823 GN=DLD PE=1 SV=1	DLD	1	9.13913e-100	377.19	2	NQVTATK(1)ADGSTEVINTK	-0.156	1.61789	2.19801	1.92072	0.121481	0.0855181	0.0563852
Biological Process	GO:0033875	9	ribonucleoside bisphosphate metabolic process	1.72	0.00299346	A0A5G2QPK6	119	K	12.123	0.00472041	Up	Dihydrolipoyl dehydrogenase OS=Sus scrofa OX=9823 GN=DLD PE=1 SV=1	DLD	1	9.06167e-05	179.1	2	MMEQK(1)SNAVK	-0.32445	1.39617	0.839096	3.30751	0.181401	0.130613	0.145213
Biological Process	GO:0033875	9	ribonucleoside bisphosphate metabolic process	1.72	0.00299346	A0A5G2QPK6	124	K	11.949	0.0040856	Up	Dihydrolipoyl dehydrogenase OS=Sus scrofa OX=9823 GN=DLD PE=1 SV=1	DLD	1	1.49524e-09	167.14	3	SNAVK(1)ALTGGIAHLFK(1)QNK	-0.511	2.07125	0.955968	1.70857	0.123067	0.141145
Biological Process	GO:0033875	9	ribonucleoside bisphosphate metabolic process	1.72	0.00299346	A0A5G2QPK6	402	K	2.117	0.0256796	Up	Dihydrolipoyl dehydrogenase OS=Sus scrofa OX=9823 GN=DLD PE=1 SV=1	DLD	1	6.03025e-06	209.19	2	SEEQLK(1)EEGIEYK	0.28517	1.32037	1.83202	0.922558	0.625911	0.712405	0.586733
Biological Process	GO:0033875	9	ribonucleoside bisphosphate metabolic process	1.72	0.00299346	A0A5G2QSG9	137	K	31.739	0.00077276	Up	Dihydrolipoamide acetyltransferase component of pyruvate dehydrogenase complex OS=Sus scrofa OX=9823 GN=PDHX PE=1 SV=1	PDHX	1	2.03991e-20	220.6	2	LGSLIGLLVEEGEDWK(1)HVEIPK	0.30876	1.78794	2.60606	1.42273	0.0933109	0.0290634	0.0608926
Biological Process	GO:0033875	9	ribonucleoside bisphosphate metabolic process	1.72	0.00299346	A0A5G2QSG9	311	K	11.655	0.000159381	Up	Dihydrolipoamide acetyltransferase component of pyruvate dehydrogenase complex OS=Sus scrofa OX=9823 GN=PDHX PE=1 SV=1	PDHX	1	1.62774e-104	382.95	4	STIPHAYATADCDLGAVLK(1)VR	-1.6514	1.89385	1.45841	2.17363	0.200507	0.146317	0.127292
Biological Process	GO:0033875	9	ribonucleoside bisphosphate metabolic process	1.72	0.00299346	A0A5G2QSG9	191	K	20.177	0.000113065	Up	Dihydrolipoamide acetyltransferase component of pyruvate dehydrogenase complex OS=Sus scrofa OX=9823 GN=PDHX PE=1 SV=1	PDHX	1	4.28436e-139	427.61	3	NILEK(1)HALDANQGTATGPR	0.1433	1.54938	2.28695	1.88034	0.124763	0.0705528	0.0880149
Biological Process	GO:0034032	9	purine nucleoside bisphosphate metabolic process	1.72	0.00299346	A0A287BA45	76	K	5.313	5.65192e-05	Up	Succinate--CoA ligase [GDP-forming] subunit beta, mitochondrial OS=Sus scrofa OX=9823 GN=SUCLG2 PE=3 SV=1	SUCLG2	1	0.00626994	103.7	2	GK(1)GVFSSGLK	-2.2376	1.6977	1.6271	1.72476	0.36339	0.32192	0.265131
Biological Process	GO:0033875	9	ribonucleoside bisphosphate metabolic process	1.72	0.00299346	A0A5G2QGS5	267	K	12.183	0.0100254	Up	Acetyl-CoA acetyltransferase 1 OS=Sus scrofa OX=9823 GN=ACAT1 PE=1 SV=1	ACAT1	1	0.00533267	173.11	2	LK(1)TVFQK	0.48107	1.52684	1.38348	1.83026	0.198907		0.0605114
Biological Process	GO:0034032	9	purine nucleoside bisphosphate metabolic process	1.72	0.00299346	A0A287BA45	254	K	2.573	0.0024603	Up	Succinate--CoA ligase [GDP-forming] subunit beta, mitochondrial OS=Sus scrofa OX=9823 GN=SUCLG2 PE=3 SV=1	SUCLG2	1	2.61085e-08	172.98	2	QK(1)DIFAMDDK	0.20076	1.14501	1.82339	1.35228	0.570803	0.554345	0.554172
Biological Process	GO:0034032	9	purine nucleoside bisphosphate metabolic process	1.72	0.00299346	A0A287ANI6	48	K	6.106	0.00207926	Up	Hydroxymethylglutaryl-CoA lyase OS=Sus scrofa OX=9823 GN=HMGCL PE=1 SV=2	HMGCL	1	2.62413e-22	271.32	3	DGLQNEK(1)NIIPTPTK	-0.073686	2.60163	1.39746	1.15652	0.281633	0.293286	0.26947
Biological Process	GO:0034032	9	purine nucleoside bisphosphate metabolic process	1.72	0.00299346	A0A5G2QIE6	270	K	8.54	0.0212944	Up	Acetyltransferase component of pyruvate dehydrogenase complex OS=Sus scrofa OX=9823 GN=DLAT PE=1 SV=1	DLAT	1	4.7975e-11	229.29	2	GIDLTQIK(1)GTGPDGR	-0.11319	1.09551	1.33998	2.20244	0.27587	0.0862052
Biological Process	GO:0034032	9	purine nucleoside bisphosphate metabolic process	1.72	0.00299346	A0A5G2QIE6	367	K	18.394	2.74021e-05	Up	Acetyltransferase component of pyruvate dehydrogenase complex OS=Sus scrofa OX=9823 GN=DLAT PE=1 SV=1	DLAT	1	6.71423e-05	143.4	2	SK(1)ISVNDFIIK	0.035448	1.45822	2.10129	2.13112	0.0930524	0.105726	0.110598
Biological Process	GO:0034032	9	purine nucleoside bisphosphate metabolic process	1.72	0.00299346	A0A5S6FV10	132	K	5.587	4.02744e-06	Up	Dihydrolipoyllysine-residue succinyltransferase component of 2-oxoglutarate dehydrogenase complex, mitochondrial OS=Sus scrofa OX=9823 GN=DLST PE=3 SV=1	DLST	1	0.0311311	72.434	2	AK(1)PAEAPAAAAPK	-1.0013	1.58949	1.85452	1.64508	0.311255	0.295046	0.304612
Biological Process	GO:0034032	9	purine nucleoside bisphosphate metabolic process	1.72	0.00299346	A0A5G2QPK6	58	K	14.471	0.00105459	Up	Dihydrolipoyl dehydrogenase OS=Sus scrofa OX=9823 GN=DLD PE=1 SV=1	DLD	1	6.98919e-05	196.48	2	AAQLGFK(1)TVCIEK	0.0011054	1.63951	1.56697	2.40569	0.205739	0.0759641	0.106127
Biological Process	GO:0034032	9	purine nucleoside bisphosphate metabolic process	1.72	0.00299346	A0A5G2QPK6	96	K	7.669	0.00101237	Up	Dihydrolipoyl dehydrogenase OS=Sus scrofa OX=9823 GN=DLD PE=1 SV=1	DLD	1	6.69026e-49	313.04	4	ALLNNSHYYHMAHGK(1)DFASR	0.81498	1.90275	1.34769	2.05746	0.18081	0.180116	0.331169
Biological Process	GO:0034032	9	purine nucleoside bisphosphate metabolic process	1.72	0.00299346	A0A5G2QPK6	135	K	2.712	0.0179189	Up	Dihydrolipoyl dehydrogenase OS=Sus scrofa OX=9823 GN=DLD PE=1 SV=1	DLD	1	2.83008e-140	407.16	3	SNAVK(1)ALTGGIAHLFK(1)QNK	-0.511	1.39969	1.94509	1.03871	0.37931	0.71524	0.52196
Biological Process	GO:0034032	9	purine nucleoside bisphosphate metabolic process	1.72	0.00299346	A0A5G2QPK6	409	K	4.416	0.00806848	Up	Dihydrolipoyl dehydrogenase OS=Sus scrofa OX=9823 GN=DLD PE=1 SV=1	DLD	1	9.81057e-41	315.21	2	EEGIEYK(1)VGK	0.0090722	1.65767	1.73328	1.50127	0.597975	0.312334	0.197473
Biological Process	GO:0034032	9	purine nucleoside bisphosphate metabolic process	1.72	0.00299346	A0A5G2QPK6	269	K	10.152	0.000750656	Up	Dihydrolipoyl dehydrogenase OS=Sus scrofa OX=9823 GN=DLD PE=1 SV=1	DLD	1	0.00021351	178.55	2	LNTK(1)VIGATK	-0.50256	1.41263	1.84138	2.20799	0.246217	0.175624	0.11616
Biological Process	GO:0034032	9	purine nucleoside bisphosphate metabolic process	1.72	0.00299346	A0A5G2QPK6	338	K	5.662	0.00569049	Up	Dihydrolipoyl dehydrogenase OS=Sus scrofa OX=9823 GN=DLD PE=1 SV=1	DLD	1	2.12613e-09	154.65	3	FQTK(1)IPNIYAIGDVVAGPMLAHK	-0.4543	1.04519	1.32725	2.7269	0.242605	0.311758	0.346298
Biological Process	GO:0034032	9	purine nucleoside bisphosphate metabolic process	1.72	0.00299346	A0A5G2QGS5	262	K	25.223	0.000792457	Up	Acetyl-CoA acetyltransferase 1 OS=Sus scrofa OX=9823 GN=ACAT1 PE=1 SV=1	ACAT1	1	0.00402759	132.57	2	VDFNK(1)VPK	0.10583	1.23796	1.78037	1.85292		0.0781217	0.050632
Biological Process	GO:0034032	9	purine nucleoside bisphosphate metabolic process	1.72	0.00299346	A0A5G2QPK6	259	K	4.306	0.00171738	Up	Dihydrolipoyl dehydrogenase OS=Sus scrofa OX=9823 GN=DLD PE=1 SV=1	DLD	1	0.000942284	135.83	2	ILQK(1)QGFK(1)FK	-0.29711	1.38859	1.8666	1.61407	0.515362	0.282005	0.333363
Biological Process	GO:0034032	9	purine nucleoside bisphosphate metabolic process	1.72	0.00299346	A0A5G2QPK6	158	K	21.78	0.00019812	Up	Dihydrolipoyl dehydrogenase OS=Sus scrofa OX=9823 GN=DLD PE=1 SV=1	DLD	1	9.13913e-100	377.19	2	NQVTATK(1)ADGSTEVINTK	-0.156	1.61789	2.19801	1.92072	0.121481	0.0855181	0.0563852
Biological Process	GO:0034032	9	purine nucleoside bisphosphate metabolic process	1.72	0.00299346	A0A5G2QPK6	119	K	12.123	0.00472041	Up	Dihydrolipoyl dehydrogenase OS=Sus scrofa OX=9823 GN=DLD PE=1 SV=1	DLD	1	9.06167e-05	179.1	2	MMEQK(1)SNAVK	-0.32445	1.39617	0.839096	3.30751	0.181401	0.130613	0.145213
Biological Process	GO:0034032	9	purine nucleoside bisphosphate metabolic process	1.72	0.00299346	A0A5G2QPK6	124	K	11.949	0.0040856	Up	Dihydrolipoyl dehydrogenase OS=Sus scrofa OX=9823 GN=DLD PE=1 SV=1	DLD	1	1.49524e-09	167.14	3	SNAVK(1)ALTGGIAHLFK(1)QNK	-0.511	2.07125	0.955968	1.70857	0.123067	0.141145
Biological Process	GO:0034032	9	purine nucleoside bisphosphate metabolic process	1.72	0.00299346	A0A5G2QPK6	402	K	2.117	0.0256796	Up	Dihydrolipoyl dehydrogenase OS=Sus scrofa OX=9823 GN=DLD PE=1 SV=1	DLD	1	6.03025e-06	209.19	2	SEEQLK(1)EEGIEYK	0.28517	1.32037	1.83202	0.922558	0.625911	0.712405	0.586733
Biological Process	GO:0034032	9	purine nucleoside bisphosphate metabolic process	1.72	0.00299346	A0A5G2QSG9	137	K	31.739	0.00077276	Up	Dihydrolipoamide acetyltransferase component of pyruvate dehydrogenase complex OS=Sus scrofa OX=9823 GN=PDHX PE=1 SV=1	PDHX	1	2.03991e-20	220.6	2	LGSLIGLLVEEGEDWK(1)HVEIPK	0.30876	1.78794	2.60606	1.42273	0.0933109	0.0290634	0.0608926
Biological Process	GO:0034032	9	purine nucleoside bisphosphate metabolic process	1.72	0.00299346	A0A5G2QSG9	311	K	11.655	0.000159381	Up	Dihydrolipoamide acetyltransferase component of pyruvate dehydrogenase complex OS=Sus scrofa OX=9823 GN=PDHX PE=1 SV=1	PDHX	1	1.62774e-104	382.95	4	STIPHAYATADCDLGAVLK(1)VR	-1.6514	1.89385	1.45841	2.17363	0.200507	0.146317	0.127292
Biological Process	GO:0034032	9	purine nucleoside bisphosphate metabolic process	1.72	0.00299346	A0A5G2QSG9	191	K	20.177	0.000113065	Up	Dihydrolipoamide acetyltransferase component of pyruvate dehydrogenase complex OS=Sus scrofa OX=9823 GN=PDHX PE=1 SV=1	PDHX	1	4.28436e-139	427.61	3	NILEK(1)HALDANQGTATGPR	0.1433	1.54938	2.28695	1.88034	0.124763	0.0705528	0.0880149
Biological Process	GO:0034032	9	purine nucleoside bisphosphate metabolic process	1.72	0.00299346	A0A5G2QSG9	170	K	7.66	0.00876038	Up	Dihydrolipoamide acetyltransferase component of pyruvate dehydrogenase complex OS=Sus scrofa OX=9823 GN=PDHX PE=1 SV=1	PDHX	1	0.00244504	75.533	3	PSVPPPPSPQPQISTPVK(1)K	0.24889		2.09625	1.44186	0.238889		0.223003
Biological Process	GO:0034032	9	purine nucleoside bisphosphate metabolic process	1.72	0.00299346	A0A5G2R718	34	K	6.023	0.0316931	Up	Pyruvate dehydrogenase E1 component subunit beta OS=Sus scrofa OX=9823 GN=PDHB PE=1 SV=1	PDHB	1	1.04594e-20	167.61	4	DAINQGMDEELERDEK(1)VFLLGEEVAQYDGAYK	-0.31808	1.03207	2.48971	0.97998	0.326682		0.171565
Biological Process	GO:0034032	9	purine nucleoside bisphosphate metabolic process	1.72	0.00299346	A0A5G2QPK6	151	K	12.703	0.000528701	Up	Dihydrolipoyl dehydrogenase OS=Sus scrofa OX=9823 GN=DLD PE=1 SV=1	DLD	1	5.05413e-10	201.61	3	ITGK(1)NQVTATK(1)ADGSTEVINTK	0.16389	1.75435	1.80692	2.00089	0.222108	0.0946223	0.121115
Biological Process	GO:0034032	9	purine nucleoside bisphosphate metabolic process	1.72	0.00299346	A0A5G2QGS5	222	K	11.922	0.00257753	Up	Acetyl-CoA acetyltransferase 1 OS=Sus scrofa OX=9823 GN=ACAT1 PE=1 SV=1	ACAT1	1	0.0158276	91.085	2	SK(1)AAWEAGK	-0.74953	2.24838	2.19285		0.26981	0.14756	0.141401
Biological Process	GO:0034032	9	purine nucleoside bisphosphate metabolic process	1.72	0.00299346	A0A5G2QGS5	123	K	2.893	0.00648098	Up	Acetyl-CoA acetyltransferase 1 OS=Sus scrofa OX=9823 GN=ACAT1 PE=1 SV=1	ACAT1	1	4.41462e-10	151.42	3	QAVLGAGLPISTPCTTINK(1)VCASGMK	1.4209	1.05519	1.54805	1.46041	0.464522		0.471823
Biological Process	GO:0034032	9	purine nucleoside bisphosphate metabolic process	1.72	0.00299346	A0A5G2QGS5	267	K	12.183	0.0100254	Up	Acetyl-CoA acetyltransferase 1 OS=Sus scrofa OX=9823 GN=ACAT1 PE=1 SV=1	ACAT1	1	0.00533267	173.11	2	LK(1)TVFQK	0.48107	1.52684	1.38348	1.83026	0.198907		0.0605114
Biological Process	GO:0034032	9	purine nucleoside bisphosphate metabolic process	1.72	0.00299346	F1RK10	157	K	8.372	0.0144662	Up	Succinate--CoA ligase [ADP-forming] subunit beta, mitochondrial OS=Sus scrofa OX=9823 GN=SUCLA2 PE=1 SV=3	SUCLA2	1	0.000252942	150.81	2	EPIDIVEGIK(1)K	-0.30176	1.08762	1.57797	1.96561	0.269359	0.0994472
Biological Process	GO:0034032	9	purine nucleoside bisphosphate metabolic process	1.72	0.00299346	F1RK10	50	K	9.942	0.000113281	Up	Succinate--CoA ligase [ADP-forming] subunit beta, mitochondrial OS=Sus scrofa OX=9823 GN=SUCLA2 PE=1 SV=3	SUCLA2	1	0.00101433	127.4	2	GK(1)GTFESGLK	0.097095	1.69445	1.62331	1.36805	0.154362		0.159834
Biological Process	GO:0034032	9	purine nucleoside bisphosphate metabolic process	1.72	0.00299346	F1RK10	35	K	9.408	0.0159815	Up	Succinate--CoA ligase [ADP-forming] subunit beta, mitochondrial OS=Sus scrofa OX=9823 GN=SUCLA2 PE=1 SV=3	SUCLA2	1	0.00363903	126.39	2	LGSK(1)DVVIK	0.28794	1.3637	1.50613	1.79932	0.259564		0.0712916
Biological Process	GO:0034032	9	purine nucleoside bisphosphate metabolic process	1.72	0.00299346	F1RK10	85	K	9.477	0.0109903	Up	Succinate--CoA ligase [ADP-forming] subunit beta, mitochondrial OS=Sus scrofa OX=9823 GN=SUCLA2 PE=1 SV=3	SUCLA2	1	0.00142966	132.76	2	LFTK(1)QTGEK	0.70056	1.3525	1.77333	1.54557	0.246634		0.0819707
Biological Process	GO:0034032	9	purine nucleoside bisphosphate metabolic process	1.72	0.00299346	A0A287B410	397	K	11.191	0.000349983	Up	Oxoglutarate dehydrogenase (succinyl-transferring) OS=Sus scrofa OX=9823 GN=OGDH PE=1 SV=1	OGDH	1	6.66516e-06	204.17	2	AEQFYCGDTEGK(1)K	-1.9287	1.48676	2.05329	1.96778	0.215892	0.111823	0.164455
Biological Process	GO:0034032	9	purine nucleoside bisphosphate metabolic process	1.72	0.00299346	A0A287B410	332	K	12.984	0.00722849	Up	Oxoglutarate dehydrogenase (succinyl-transferring) OS=Sus scrofa OX=9823 GN=OGDH PE=1 SV=1	OGDH	1	2.14534e-18	187.62	3	ELEQIFCQFDSK(1)LEAADEGSGDVK	0.069913	1.68382	1.85743	2.0297	0.20778	0.183789	0.0374786
Biological Process	GO:0034032	9	purine nucleoside bisphosphate metabolic process	1.72	0.00299346	A0A287B410	856	K	11.371	0.029403	Up	Oxoglutarate dehydrogenase (succinyl-transferring) OS=Sus scrofa OX=9823 GN=OGDH PE=1 SV=1	OGDH	1	0.000954733	176.62	2	KPLIIFTPK(1)SLLR	0.32948	1.17411	1.22931	2.31967	0.233372	0.043537
Biological Process	GO:0034032	9	purine nucleoside bisphosphate metabolic process	1.72	0.00299346	A0A287B410	530	K	7.263	0.0333406	Up	Oxoglutarate dehydrogenase (succinyl-transferring) OS=Sus scrofa OX=9823 GN=OGDH PE=1 SV=1	OGDH	1	0.0188811	117.62	2	QK(1)PVLQK	0.070136	1.42474	2.09118		0.318124		0.165958
Biological Process	GO:0034032	9	purine nucleoside bisphosphate metabolic process	1.72	0.00299346	A0A287B410	74	K	27.141	8.5868e-06	Up	Oxoglutarate dehydrogenase (succinyl-transferring) OS=Sus scrofa OX=9823 GN=OGDH PE=1 SV=1	OGDH	1	8.29002e-09	236.35	2	SVHK(1)SWDIFFR	0.43754	1.83248	2.0545	1.8998	0.0857363	0.0687417	0.0587335
Biological Process	GO:0034032	9	purine nucleoside bisphosphate metabolic process	1.72	0.00299346	A0A287B410	895	K	22.201	1.3865e-05	Up	Oxoglutarate dehydrogenase (succinyl-transferring) OS=Sus scrofa OX=9823 GN=OGDH PE=1 SV=1	OGDH	1	6.82848e-11	194.7	2	VIPEDGPAAQNPENVK(1)R	-0.085366	1.66715	2.26572	1.80852	0.0958699	0.0735664	0.089168
Biological Process	GO:0034032	9	purine nucleoside bisphosphate metabolic process	1.72	0.00299346	A0A287B410	560	K	5.441	0.00038105	Up	Oxoglutarate dehydrogenase (succinyl-transferring) OS=Sus scrofa OX=9823 GN=OGDH PE=1 SV=1	OGDH	1	0.000312515	192.26	2	YDK(1)ICEEAFAR	0.10045	1.66333	1.8309	1.5743	0.403795	0.244742	0.282931
Biological Process	GO:0034032	9	purine nucleoside bisphosphate metabolic process	1.72	0.00299346	F1SED0	425	K	11.718	0.000265981	Up	Acyl-CoA dehydrogenase short/branched chain OS=Sus scrofa OX=9823 GN=ACADSB PE=1 SV=4	ACADSB	1	1.34896e-123	409.14	3	IGTIYEGTSNIQLNTIAK(1)NVSK	3.0881	2.04105	1.63397	1.8532	0.110133	0.21613	0.145512
Biological Process	GO:0034032	9	purine nucleoside bisphosphate metabolic process	1.72	0.00299346	A0A287B574	69	K	13.454	0.000809585	Up	Succinate--CoA ligase [ADP/GDP-forming] subunit alpha, mitochondrial OS=Sus scrofa OX=9823 GN=SUCLG1 PE=3 SV=2	SUCLG1	1	1.5541e-51	318.7	2	GGK(1)THLGLPVFNTVK	-0.4171	2.52201	1.47741	1.58546	0.206454	0.0946707	0.113987
Biological Process	GO:0034032	9	purine nucleoside bisphosphate metabolic process	1.72	0.00299346	A0A287B574	30	K	6.626	0.00102062	Up	Succinate--CoA ligase [ADP/GDP-forming] subunit alpha, mitochondrial OS=Sus scrofa OX=9823 GN=SUCLG1 PE=3 SV=2	SUCLG1	1	0.000948802	138.4	2	HLYVDK(1)NTK	-2.4741	1.27191	1.864	2.07731	0.35322	0.224493	0.209062
Biological Process	GO:0034032	9	purine nucleoside bisphosphate metabolic process	1.72	0.00299346	A0A287B574	168	K	5.747	0.00102914	Up	Succinate--CoA ligase [ADP/GDP-forming] subunit alpha, mitochondrial OS=Sus scrofa OX=9823 GN=SUCLG1 PE=3 SV=2	SUCLG1	1	0.00068043	125.31	2	IGIMPGHIHK(1)K	-0.50267	1.50735	1.58892	1.384	0.303875	0.215854
Biological Process	GO:0034032	9	purine nucleoside bisphosphate metabolic process	1.72	0.00299346	A0A287B574	24	K	21.156	0.000678481	Up	Succinate--CoA ligase [ADP/GDP-forming] subunit alpha, mitochondrial OS=Sus scrofa OX=9823 GN=SUCLG1 PE=3 SV=2	SUCLG1	1	0.0109422	131.03	2	K(1)HLYVDK	-2.3891	1.51417	1.92575	2.28927	0.150025	0.0646773	0.0561104
Biological Process	GO:0034032	9	purine nucleoside bisphosphate metabolic process	1.72	0.00299346	A0A480V3W7	175	K	15.847	0.00208505	Up	Acyl-CoA thioesterase 9 OS=Sus scrofa OX=9823 GN=ACOT9 PE=1 SV=1	ACOT9	1	0.00119203	90.561	3	FSGHVSWVGK(1)TSMEVK	-0.1668	1.44618	1.46584	1.88613	0.134303		0.0675459
Biological Process	GO:0034032	9	purine nucleoside bisphosphate metabolic process	1.72	0.00299346	A0A480V3W7	293	K	22.1	0.000183032	Up	Acyl-CoA thioesterase 9 OS=Sus scrofa OX=9823 GN=ACOT9 PE=1 SV=1	ACOT9	1	2.24141e-08	221.8	3	LK(1)SLDICHPQER	0.83228	1.60489	1.82551	2.30985	0.12258	0.0600394	0.0771232
Biological Process	GO:0034032	9	purine nucleoside bisphosphate metabolic process	1.72	0.00299346	A0A5G2QGS5	189	K	7.57	0.00461557	Up	Acetyl-CoA acetyltransferase 1 OS=Sus scrofa OX=9823 GN=ACAT1 PE=1 SV=1	ACAT1	1	1.45144e-17	199.61	3	DGLTDVYNK(1)IHMGNCAENTAK	-0.045735	2.1555	2.01764		0.377836	0.183822	0.265202
Biological Process	GO:0034032	9	purine nucleoside bisphosphate metabolic process	1.72	0.00299346	A0A5G2QGS5	244	K	12.716	0.000615442	Up	Acetyl-CoA acetyltransferase 1 OS=Sus scrofa OX=9823 GN=ACAT1 PE=1 SV=1	ACAT1	1	9.35826e-08	212.59	2	GK(1)PDTVVKEDEEYKR	-0.14921	1.5701	1.94238	2.05008	0.221611	0.121732	0.0940989
Biological Process	GO:0034032	9	purine nucleoside bisphosphate metabolic process	1.72	0.00299346	A0A5G2QGS5	250	K	11.974	0.0032655	Up	Acetyl-CoA acetyltransferase 1 OS=Sus scrofa OX=9823 GN=ACAT1 PE=1 SV=1	ACAT1	1	8.23212e-40	308.74	2	GKPDTVVK(1)EDEEYKR	0.19203	1.50355	1.55256	1.68019	0.181169		0.0825359
Biological Process	GO:0034032	9	purine nucleoside bisphosphate metabolic process	1.72	0.00299346	A0A287AJ16	45	K	3.441	0.0430235	Up	Acyl-CoA synthetase bubblegum family member 2 OS=Sus scrofa OX=9823 GN=ACSBG2 PE=1 SV=2	ACSBG2	1	7.593e-12	190.25	3	LSK(1)HGPGHETPMTIPEFFR	-0.018293	1.60297	0.666282	2.37979	0.499939	0.429165	0.421856
Biological Process	GO:0034032	9	purine nucleoside bisphosphate metabolic process	1.72	0.00299346	A0A5G2R718	50	K	6.433	0.000338382	Up	Pyruvate dehydrogenase E1 component subunit beta OS=Sus scrofa OX=9823 GN=PDHB PE=1 SV=1	PDHB	1	2.1295e-55	321.67	3	VFLLGEEVAQYDGAYK(1)VSR	-0.11923	1.30726	1.5305	1.69276	0.241922	0.227567
Biological Process	GO:0033875	9	ribonucleoside bisphosphate metabolic process	1.72	0.00299346	A0A5G2QGS5	250	K	11.974	0.0032655	Up	Acetyl-CoA acetyltransferase 1 OS=Sus scrofa OX=9823 GN=ACAT1 PE=1 SV=1	ACAT1	1	8.23212e-40	308.74	2	GKPDTVVK(1)EDEEYKR	0.19203	1.50355	1.55256	1.68019	0.181169		0.0825359
Biological Process	GO:0033875	9	ribonucleoside bisphosphate metabolic process	1.72	0.00299346	A0A5G2QGS5	189	K	7.57	0.00461557	Up	Acetyl-CoA acetyltransferase 1 OS=Sus scrofa OX=9823 GN=ACAT1 PE=1 SV=1	ACAT1	1	1.45144e-17	199.61	3	DGLTDVYNK(1)IHMGNCAENTAK	-0.045735	2.1555	2.01764		0.377836	0.183822	0.265202
Biological Process	GO:1901606	9	alpha-amino acid catabolic process	1.82	0.002896	A0A5G2QIN8	319	K	4.487	0.0246806	Up	Aldehyde dehydrogenase 5 family member A1 OS=Sus scrofa OX=9823 GN=ALDH5A1 PE=1 SV=1	ALDH5A1	1	0.000868422	136.27	3	GIHDSFVK(1)K	-0.54088	2.18467	1.08874	1.63303	0.168477	0.68968	0.235411
Biological Process	GO:1901606	9	alpha-amino acid catabolic process	1.82	0.002896	A0A5G2QIN8	355	K	10.103	0.000216434	Up	Aldehyde dehydrogenase 5 family member A1 OS=Sus scrofa OX=9823 GN=ALDH5A1 PE=1 SV=1	ALDH5A1	1	0.000385609	124.6	2	VEK(1)HVIDAISK	-0.22712	1.99215	1.67125	1.79619	0.242916	0.164325	0.133176
Biological Process	GO:1901606	9	alpha-amino acid catabolic process	1.82	0.002896	F1SK15	269	K	8.095	0.00138476	Up	Methylcrotonoyl-CoA carboxylase 2 OS=Sus scrofa OX=9823 GN=MCCC2 PE=1 SV=3	MCCC2	1	2.88828e-05	112.55	4	K(1)SGVSDYYALDDNHALHLVR	1.2163	1.19658	1.89434	1.52862	0.203764		0.176699
Biological Process	GO:1901606	9	alpha-amino acid catabolic process	1.82	0.002896	A0A287BAZ8	321	K	16.9	0.000473841	Up	Lysine ketoglutarate reductase OS=Sus scrofa OX=9823 GN=AASS PE=1 SV=2	AASS	1	6.86637e-43	307.32	2	TDGVYDPIEYDK(1)HPER	0.59106	1.64167	1.35089	2.67225	0.152804	0.0847786	0.097612
Biological Process	GO:1901606	9	alpha-amino acid catabolic process	1.82	0.002896	A0A287BAZ8	23	K	6.542	1.21191e-05	Up	Lysine ketoglutarate reductase OS=Sus scrofa OX=9823 GN=AASS PE=1 SV=2	AASS	1	0.000821172	112.75	2	LHHK(1)AVMALR	-0.24322	1.82443	1.67046	1.70957	0.269504	0.292608	0.233424
Biological Process	GO:1901606	9	alpha-amino acid catabolic process	1.82	0.002896	P00506	90	K	27.053	0.000878985	Up	Aspartate aminotransferase, mitochondrial OS=Sus scrofa OX=9823 GN=GOT2 PE=1 SV=2	GOT2	1	1.28758e-38	315.59	2	K(1)AEAQIAAK(1)NLDK	-0.28283	1.73603	1.80514	2.24496	0.126186	0.0526204	0.0350725
Biological Process	GO:1901606	9	alpha-amino acid catabolic process	1.82	0.002896	P00506	122	K	4.877	0.0126835	Up	Aspartate aminotransferase, mitochondrial OS=Sus scrofa OX=9823 GN=GOT2 PE=1 SV=2	GOT2	1	4.4751e-100	385.31	2	ASAELALGENNEVLK(1)SGR	-0.26663	1.24871	1.6234	2.1069	0.602666	0.178371	0.239957
Biological Process	GO:1901606	9	alpha-amino acid catabolic process	1.82	0.002896	P00506	73	K	4.807	0.0021095	Up	Aspartate aminotransferase, mitochondrial OS=Sus scrofa OX=9823 GN=GOT2 PE=1 SV=2	GOT2	1	0.00311676	112.13	2	DDNGK(1)PYVLPSVR	-0.24733	1.52005	1.67046	1.77625	0.371542	0.21292	0.448776
Biological Process	GO:1901606	9	alpha-amino acid catabolic process	1.82	0.002896	P00506	159	K	27.652	0.00017082	Up	Aspartate aminotransferase, mitochondrial OS=Sus scrofa OX=9823 GN=GOT2 PE=1 SV=2	GOT2	1	2.28188e-25	259.7	2	DVFLPK(1)PSWGNHTPIFR	-0.14649	2.4752	1.57385	1.74154	0.08588	0.0787644	0.0447638
Biological Process	GO:1901606	9	alpha-amino acid catabolic process	1.82	0.002896	F1RPW8	261	K	8.838	0.0094786	Up	Asparaginase-like protein 1 OS=Sus scrofa OX=9823 GN=ASRGL1 PE=1 SV=3	ASRGL1	1	0.00430827	108.26	2	VK(1)GVGGVIVVNK	-0.53896	1.19562	1.31602	2.13766	0.240696	0.110001
Biological Process	GO:1901606	9	alpha-amino acid catabolic process	1.82	0.002896	P00506	404	K	13.671	0.00011086	Up	Aspartate aminotransferase, mitochondrial OS=Sus scrofa OX=9823 GN=GOT2 PE=1 SV=2	GOT2	1	3.9735e-05	205.09	2	EFSIYMTK(1)DGR	-0.40074	1.99297	1.75064	1.84742	0.185849	0.11365	0.10947
Biological Process	GO:1901606	9	alpha-amino acid catabolic process	1.82	0.002896	P00506	279	K	32.497	0.000531278	Up	Aspartate aminotransferase, mitochondrial OS=Sus scrofa OX=9823 GN=GOT2 PE=1 SV=2	GOT2	1	3.08668e-46	282.05	3	HFIEQGINVCLCQSYAK(1)NMGLYGER	-0.21123	1.75921	1.28562	1.85466		0.0609308	0.0395821
Biological Process	GO:1901606	9	alpha-amino acid catabolic process	1.82	0.002896	P00506	345	K	8.513	0.00572542	Up	Aspartate aminotransferase, mitochondrial OS=Sus scrofa OX=9823 GN=GOT2 PE=1 SV=2	GOT2	1	8.52894e-05	179.19	3	QQWLQEVK(1)GMADR	-0.49791	1.41017	1.98195	1.24477	0.239821		0.123294
Biological Process	GO:1901606	9	alpha-amino acid catabolic process	1.82	0.002896	P00506	309	K	10.969	0.000213193	Up	Aspartate aminotransferase, mitochondrial OS=Sus scrofa OX=9823 GN=GOT2 PE=1 SV=2	GOT2	1	1.53243e-05	207.29	2	VESQLK(1)ILIR	0.4788	1.91308	1.91324	1.67237	0.228165	0.121864	0.151283
Biological Process	GO:1901606	9	alpha-amino acid catabolic process	1.82	0.002896	P00506	296	K	13.166	0.000619756	Up	Aspartate aminotransferase, mitochondrial OS=Sus scrofa OX=9823 GN=GOT2 PE=1 SV=2	GOT2	1	4.3194e-07	196.67	3	VGAFTVVCK(1)DAEEAK(1)R	0.22048	1.47011	1.86087	2.24548	0.212591	0.0968385	0.114108
Biological Process	GO:1901606	9	alpha-amino acid catabolic process	1.82	0.002896	P00506	185	K	7.392	0.000898733	Up	Aspartate aminotransferase, mitochondrial OS=Sus scrofa OX=9823 GN=GOT2 PE=1 SV=2	GOT2	1	1.17093e-17	213.49	2	YYDPK(1)TCGFDFTGALEDISK	1.4659	1.89835	1.72845	1.65824	0.351514	0.164186	0.199257
Biological Process	GO:1901606	9	alpha-amino acid catabolic process	1.82	0.002896	A0A5G2QGS5	189	K	7.57	0.00461557	Up	Acetyl-CoA acetyltransferase 1 OS=Sus scrofa OX=9823 GN=ACAT1 PE=1 SV=1	ACAT1	1	1.45144e-17	199.61	3	DGLTDVYNK(1)IHMGNCAENTAK	-0.045735	2.1555	2.01764		0.377836	0.183822	0.265202
Biological Process	GO:1901606	9	alpha-amino acid catabolic process	1.82	0.002896	A0A5G2QGS5	244	K	12.716	0.000615442	Up	Acetyl-CoA acetyltransferase 1 OS=Sus scrofa OX=9823 GN=ACAT1 PE=1 SV=1	ACAT1	1	9.35826e-08	212.59	2	GK(1)PDTVVKEDEEYKR	-0.14921	1.5701	1.94238	2.05008	0.221611	0.121732	0.0940989
Biological Process	GO:1901606	9	alpha-amino acid catabolic process	1.82	0.002896	A0A5G2QGS5	250	K	11.974	0.0032655	Up	Acetyl-CoA acetyltransferase 1 OS=Sus scrofa OX=9823 GN=ACAT1 PE=1 SV=1	ACAT1	1	8.23212e-40	308.74	2	GKPDTVVK(1)EDEEYKR	0.19203	1.50355	1.55256	1.68019	0.181169		0.0825359
Biological Process	GO:1901606	9	alpha-amino acid catabolic process	1.82	0.002896	A0A5G2QGS5	267	K	12.183	0.0100254	Up	Acetyl-CoA acetyltransferase 1 OS=Sus scrofa OX=9823 GN=ACAT1 PE=1 SV=1	ACAT1	1	0.00533267	173.11	2	LK(1)TVFQK	0.48107	1.52684	1.38348	1.83026	0.198907		0.0605114
Biological Process	GO:1901606	9	alpha-amino acid catabolic process	1.82	0.002896	P00506	234	K	11.05	0.000617036	Up	Aspartate aminotransferase, mitochondrial OS=Sus scrofa OX=9823 GN=GOT2 PE=1 SV=2	GOT2	1	1.70945e-06	93.437	5	IPAQSVILLHACAHNPTGVDPRPEQWK(1)EMATLVK(1)K	-0.28561	1.64881	2.15028	1.70299	0.247217	0.139063	0.111637
Biological Process	GO:1901606	9	alpha-amino acid catabolic process	1.82	0.002896	F1RPW8	112	K	44.846	0.000417489	Up	Asparaginase-like protein 1 OS=Sus scrofa OX=9823 GN=ASRGL1 PE=1 SV=3	ASRGL1	1	4.09075e-68	338.23	3	LVMEK(1)THHCFLTDQGAAK	-0.13106	1.2552	2.06775	2.54617	0.0701378	0.0337045	0.0270294
Biological Process	GO:1901606	9	alpha-amino acid catabolic process	1.82	0.002896	F1RPW8	271	K	13.256	0.0045557	Up	Asparaginase-like protein 1 OS=Sus scrofa OX=9823 GN=ASRGL1 PE=1 SV=3	ASRGL1	1	1.10699e-10	192.68	3	GVGGVIVVNK(1)AGDWAVK	0.26008	1.28883	1.0532	2.41855	0.128251	0.111168
Biological Process	GO:1901606	9	alpha-amino acid catabolic process	1.82	0.002896	A0A287BPT0	442	K	6.095	0.00897975	Up	Amine oxidase OS=Sus scrofa OX=9823 GN=IL4I1 PE=1 SV=1	IL4I1	1	0.000402054	190.51	2	LWDGSGVIK(1)R	-0.021554	1.68127	1.17312	2.29994	0.487875	0.205652	0.152136
Biological Process	GO:0042407	9	cristae formation	2.09	0.00232596	A0A2C9F3A3	162	K	13.487	0.000396689	Up	ATP synthase peripheral stalk subunit OSCP OS=Sus scrofa OX=9823 GN=ATP5PO PE=3 SV=1	ATP5PO	1	0.00154211	131.44	2	TVLK(1)SFLSK	0.69706	2.08186	1.54456	1.95942	0.198325	0.123964	0.0918761
Biological Process	GO:0042407	9	cristae formation	2.09	0.00232596	A0A2C9F3A3	54	K	3.295	0.000528022	Up	ATP synthase peripheral stalk subunit OSCP OS=Sus scrofa OX=9823 GN=ATP5PO PE=3 SV=1	ATP5PO	1	9.69164e-06	204.79	2	QNK(1)LEQVEK	2.6593	1.39422	1.54617	1.66272	0.562289	0.390779	0.443826
Biological Process	GO:0042407	9	cristae formation	2.09	0.00232596	A0A2C9F3A3	90	K	7.594	0.00189092	Up	ATP synthase peripheral stalk subunit OSCP OS=Sus scrofa OX=9823 GN=ATP5PO PE=3 SV=1	ATP5PO	1	0.00185402	121.73	2	VK(1)SLSDMTAK	-0.08359	1.64903	1.52195	2.13086	0.366611	0.153366	0.178175
Biological Process	GO:0042407	9	cristae formation	2.09	0.00232596	A0A2C9F3A3	199	K	3.734	0.00703002	Up	ATP synthase peripheral stalk subunit OSCP OS=Sus scrofa OX=9823 GN=ATP5PO PE=3 SV=1	ATP5PO	1	0.00784711	107.57	2	YVDMSAK(1)TK	-0.84839		1.96565	1.60134	0.602422	0.465235	0.365349
Biological Process	GO:0042407	9	cristae formation	2.09	0.00232596	Q95339	48	K	3.421	0.0443506	Up	ATP synthase subunit f, mitochondrial OS=Sus scrofa OX=9823 GN=ATP5MF PE=1 SV=4	ATP5MF	1	0.00198235	126.28	2	YYNK(1)YVNVK	0.069426		1.14579	2.33014	0.707356	0.375224	0.441488
Biological Process	GO:0042407	9	cristae formation	2.09	0.00232596	F1SLA0	186	K	10.948	0.00494248	Up	ATP synthase subunit beta OS=Sus scrofa OX=9823 GN=ATP5F1B PE=1 SV=3	ATP5F1B	1	3.48884e-73	349.36	2	DATSK(1)VALVYGQMNEPPGAR	0.1646	1.56605	1.59411	2.33768	0.31474	0.0705891	0.116829
Biological Process	GO:0042407	9	cristae formation	2.09	0.00232596	F1SLA0	181	K	5.224	0.00736412	Up	ATP synthase subunit beta OS=Sus scrofa OX=9823 GN=ATP5F1B PE=1 SV=3	ATP5F1B	1	5.53867e-18	183.05	3	EGNDLYHEMIESGVINLK(1)DATSK	-1.6087	1.57695	2.30766		0.502214	0.309979	0.303192
Biological Process	GO:0042407	9	cristae formation	2.09	0.00232596	F1SLA0	402	K	2.794	0.0106685	Up	ATP synthase subunit beta OS=Sus scrofa OX=9823 GN=ATP5F1B PE=1 SV=3	ATP5F1B	1	0.00100762	75.773	3	FLSQPFQVAEVFTGHLGK(1)LVPLK	0.25155	1.15023	1.6496	1.23687		0.41109	0.552206
Biological Process	GO:0042407	9	cristae formation	2.09	0.00232596	F1SLA0	123	K	7.405	0.00970909	Up	ATP synthase subunit beta OS=Sus scrofa OX=9823 GN=ATP5F1B PE=1 SV=3	ATP5F1B	1	0.000997598	119.53	2	GGK(1)IGLFGGAGVGK	-0.12943	1.31266	1.13613	2.83733	0.404547	0.133587	0.175749
[truncated: 48,898 more rows]

## Sheet: Down
GO Terms Level 1	GO Terms Description	GO Terms Level	GO Terms ID	Mapping	Background	All Mapping	All Background	Fold Enrichment	Fisher's exact test p value	-log10(p value)	Related proteins
[truncated: 30 more rows]

[truncated: 3 more sheets: Down GO2Protein, all, all GO2Protein]
