# Supplementary material for: Cryopreservation Induces Acetylation of Metabolism-Related Proteins in Boar Sperm
Source: Int J Mol Sci. 2023 Jul 1;24(13):10983. doi: 10.3390/ijms241310983 (PMC10341673; doi:10.3390/ijms241310983)
Supplement: Supplementary file 1 [file ijms-24-10983-s001.zip › KEGG pathway enrichment of differentially expressed proteins between fresh and frozen-thawed boar sperm.xlsx]

## Sheet: Up
KEGG pathway	Mapping	Background	All Mapping	All Background	Fold Enrichment	Fisher's exact test p value	-log10(p value)	Related proteins
map05016 Huntington disease	59	89	271	703	1.72	2.00985e-08	7.7	A0A287AXS7 F2Z565 A0A286ZIE8 A0A5G2QJQ9 A0A286ZPL5 F1SM98 A0A286ZUN9 A0A5G2R4S0 A0A287A2Y4 A0A287A4Z2 F1SKM0 A0A287A9I8 A0A287AAR5 P13618 A0A287AE88 A0A287AF97 F1RPS8 A0A287AHL5 A0A287AND7 A0A287AP21 F1SHD7 A0A287AS93 A0A287AZF9 A0A287B5J3 A0A287BAW0 A0A287BF02 A0A287BGN0 A0A2C9F3A3 A0A5G2QGD4 A0A5G2Q729 A0A5G2Q7D7 F1SE26 A0A5G2QUI5 A0A5G2QNW8 I3LGD4 A0A5G2REY8 A1XQT2 F1RGE3 F1RI18 F1RNZ1 F1RRA6 …
map05012 Parkinson disease	49	70	271	703	1.82	2.29628e-08	7.64	A0A287AXS7 F2Z565 A0A286ZIE8 F1SM98 A0A287ACC3 A0A286ZUN9 A0A5G2R4S0 A0A287A2Y4 F1SKM0 A0A287A9I8 A0A287AAR5 P13618 A0A287AE88 F1RPS8 A0A287AND7 A0A287AP21 F1SHD7 A0A287AS93 A0A287AZF9 A0A287BAW0 A0A287BGN0 A0A2C9F3A3 A0A5G2QGD4 A0A5G2Q729 A0A5G2Q7D7 F1SE26 A0A5G2REY8 A1XQT2 F1RGE3 F1RI18 F1RNZ1 F1RRA6 F1RVN1 F1S031 F1S2F6 F1SIS9 F1SJ34 F1SLA0 F1SLR1 F1SQP4 F1SV23 I3LDC1 I3LER5 K7GR43 K7GS22 K7GS…
map05010 Alzheimer disease	44	64	271	703	1.78	3.34913e-07	6.48	F1SM98 A0A286ZUN9 A0A5G2R4S0 A0A287A2Y4 F1SKM0 A0A287A9I8 A0A287AAR5 P13618 A0A287AE88 F1RPS8 A0A287AHS0 A0A287AND7 F1SHD7 A0A287AS93 A0A287AZF9 A0A287BAW0 A0A5G2R3M8 A0A287BGN0 A0A2C9F3A3 A0A5G2QGD4 A0A5G2Q729 A0A5G2Q7D7 A0A5G2QSR2 A0A5G2REY8 A1XQT2 F1RGE3 F1RI18 F1RNZ1 F1RVN1 F1S031 F1SIS9 F1SJ34 F1SLA0 F1SLR1 F1SQP4 F1SV23 I3LDC1 I3LER5 K7GR43 K7GS22 K7GSE5 P00355 Q35914 Q5S3G4
map00020 Citrate cycle (TCA cycle)	22	27	271	703	2.11	5.65588e-06	5.25	A0A286ZKX2 A0A286ZQY6 A0A287BA45 P33198 F1S297 F1RK10 A0A287B410 A0A287B574 A0A5G2Q7D7 A0A5G2QIE6 A0A5S6FV10 A0A5G2QPK6 A0A5G2R718 P00346 I3LCI2 A0A5S8M9X9 F1RUV5 F1S0N2 P16276 F1SRC5 I3LDC1 Q1G1K7
map00190 Oxidative phosphorylation	43	66	271	703	1.69	7.33456e-06	5.13	F1SM98 A0A286ZUN9 A0A5G2R4S0 A0A287A2Y4 F1SKM0 A0A5G2QK91 A0A287A9I8 A0A287AAR5 P13618 A0A287AE88 F1RPS8 A0A287AND7 F1SHD7 A0A287AS93 A0A287AZF9 A0A287BAW0 A0A287BGN0 A0A2C9F3A3 A0A5G2QGD4 A0A5G2Q729 A0A5G2Q7D7 A0A5G2REY8 Q95339 A1XQT2 F1RGE3 F1RI18 F1RNZ1 F1RVN1 F1S031 F1SIS9 F1SJ34 F1SLA0 F1SLR1 F1SQP4 F1SV23 I3LDC1 I3LER5 I3LFE8 K7GR43 K7GS22 K7GSE5 Q35914 Q5S3G4
map04218 Cellular senescence	10	10	271	703	2.59	6.5327e-05	4.18	A0A287AXS7 F2Z565 A0A286ZIE8 A0A5G2QW89 Q2EHH7 A0A287AHS0 F1SE26 F1RRA6 F1S2F6 Q29380
map00071 Fatty acid degradation	17	21	271	703	2.1	0.000101424	3.99	A0A287ADK3 A0A287BG49 A0A287AA21 A0A287AJ16 A0A5G2QES7 F1SED0 Q2XQV4 A0A5G2QGJ8 A0A5G2RC01 A0A5G2QGS5 F1ST43 A0A5G2R8A9 A0A5S6HDE4 F6PZX4 F1RWZ4 P79274 Q29554
map04714 Thermogenesis	45	76	271	703	1.54	0.000150717	3.82	F1SM98 Q68J42 A0A287ACC3 A0A286ZUN9 A0A5G2R4S0 A0A287A2Y4 F1SKM0 A0A5G2QK91 A0A287A9I8 A0A287AAR5 P13618 A0A287AE88 F1RPS8 A0A287AND7 F1SHD7 A0A287AS93 A0A287AZF9 A0A287BAW0 A0A287BGN0 A0A2C9F3A3 A0A5G2QGD4 A0A5G2Q729 A0A5G2Q7D7 A0A5G2R8A9 A0A5G2REY8 Q95339 A1XQT2 F1RGE3 F1RI18 F1RNZ1 F1RVN1 F1S031 F1SIS9 F1SJ34 F1SLA0 F1SLR1 F1SQP4 F1SV23 I3LDC1 I3LER5 K7GR43 K7GS22 K7GSE5 Q35914 Q5S3G4
map00310 Lysine degradation	12	14	271	703	2.22	0.000360171	3.44	A0A287ADK3 I3LHA2 A0A287AA21 A0A287ALM2 A0A287BAZ8 Q2XQV4 F1SUX9 A0A5G2QGS5 A0A5S6FV10 A0A5G2QPK6 A0A5S6HDE4 Q29554
map00380 Tryptophan metabolism	11	13	271	703	2.2	0.000825854	3.08	A0A287ADK3 A0A287AA21 A0A287ALM2 A0A287BPT0 Q2XQV4 A0A5G2QUP3 A0A5G2QGS5 A0A5S6FV10 A0A5G2QPK6 A0A5S6HDE4 Q29554
map04217 Necroptosis	14	18	271	703	2.02	0.000854325	3.07	A0A287AXS7 F2Z565 A0A286ZIE8 A0A287A9T4 F1RXT0 A0A286ZVG1 A0A287AFJ1 O02705 F1SE26 A0A5G2R3R8 A0A5S6GHG5 F1RRA6 F1S2F6 Q29380
map04932 Non-alcoholic fatty liver disease (NAFLD)	31	51	271	703	1.58	0.000932835	3.03	F1SM98 A0A286ZUN9 F1SKM0 A0A287AAR5 A0A287AE88 A0A287AND7 F1SHD7 A0A287AS93 A0A287AZF9 A0A287BAW0 A0A287BGN0 A0A5G2QGD4 A0A5G2Q729 A0A5G2Q7D7 A0A5G2REY8 A1XQT2 F1RGE3 F1RI18 F1RNZ1 F1RVN1 F1S031 F1SIS9 F1SJ34 F1SLR1 F1SQP4 F1SV23 I3LDC1 I3LER5 K7GR43 K7GSE5 Q5S3G4
map00280 Valine, leucine and isoleucine degradation	22	33	271	703	1.73	0.00142429	2.85	A0A287ADK3 A0A5G2QFH7 A0A287BG49 A0A287AA21 A0A287ANI6 A0A287BPT0 F1SED0 F1SK15 A0A287B9G2 A0A287BA08 Q2XQV4 A0A5G2QGJ8 A0A5G2RC01 A0A5G2QGS5 A0A5G2QJH4 A0A5G2QR28 A0A5G2QPK6 A0A5G2QSR2 A0A5G2RA17 A0A5S6HDE4 F6PZX4 Q29554
map00640 Propanoate metabolism	15	20	271	703	1.95	0.00158134	2.8	A0A287BA45 A0A5G2QFH7 A0A287BG49 A0A287AA21 F1RK10 A0A287B2H7 A0A287B574 A0A287B9G2 A0A287BA08 A0A5G2QGS5 A0A5G2QPK6 A0A5G2RA17 D2D0E6 F1SFX0 Q29554
map00620 Pyruvate metabolism	15	21	271	703	1.85	0.00245738	2.61	A0A287ADK3 A0A5G2QSJ2 A0A287AAI9 A0A287B2H7 Q2XQV4 A0A5G2QGS5 A0A5G2QIE6 A0A5G2QPK6 A0A5G2R718 F1STS4 P00346 I3LCI2 A0A5S8M9X9 F1RUV5 F1SFX0
map00650 Butanoate metabolism	8	9	271	703	2.31	0.00273116	2.56	A0A287A9Z2 A0A287BG49 A0A287AA21 A0A287ANI6 A0A5G2QIN8 A0A5G2QGS5 A0A5S6HDE4 Q29554
map00410 beta-Alanine metabolism	8	10	271	703	2.08	0.0164588	1.78	A0A287ADK3 A0A287BG49 A0A287AA21 A0A287B9G2 Q2XQV4 A0A5G2RA17 D2D0E6 Q29554
map00062 Fatty acid elongation	8	10	271	703	2.08	0.0164588	1.78	A0A286ZVQ0 A0A287B8N7 A0A287AA21 A0A5G2R0S9 A0A5G2QGJ8 A0A5S6HDE4 F6PZX4 Q29554
map04022 cGMP-PKG signaling pathway	12	19	271	703	1.64	0.0315241	1.5	A0A287AXS7 F2Z565 A0A286ZIE8 A0A286ZS14 Q2EHH7 A0A287AHS0 A0A287AP21 F1SE26 F1RRA6 F1S2F6 I3L8L8 Q29380
map00982 Drug metabolism - cytochrome P450	5	6	271	703	2.16	0.0340685	1.47	A0A5G2QES7 A0A5G2Q9E2 A0A5G2QUP3 F1S5N4 F1S605
map00980 Metabolism of xenobiotics by cytochrome P450	5	6	271	703	2.16	0.0340685	1.47	A0A5G2QES7 A0A5G2Q9E2 A0A5G2R0M9 F1S5N4 F1S605
map00010 Glycolysis / Gluconeogenesis	18	31	271	703	1.51	0.0361063	1.44	A0A287ADK3 A0A286ZYX8 P50578 A0A5G2QES7 A0A287B2H7 Q2XQV4 A0A288CFT0 I3LK59 A0A5G2QIE6 A0A5G2QPK6 A0A5G2R718 F1SUF2 I3LCI2 F1RM74 F1S4S3 F1SFX0 P00355 Q1KYT0
map04260 Cardiac muscle contraction	13	21	271	703	1.61	0.0381439	1.42	A0A286ZS14 F1SKM0 A0A287AND7 A0A287AZF9 A0A287BGN0 A0A5G2REY8 A1XQT2 F1RI18 F1RNZ1 F1SJ34 I3L8L8 I3LER5 Q5S3G4
map00330 Arginine and proline metabolism	9	13	271	703	1.8	0.0394046	1.4	A0A287ADK3 F1SDP3 P00506 Q2XQV4 A0A5G2QUP3 Q29594 F1SA26 I3LNB4 P28839
map05166 Human T-cell leukemia virus 1 infection	11	17	271	703	1.68	0.0402966	1.39	A0A287AXS7 F2Z565 A0A286ZIE8 A0A287AN65 A0A287ACC3 A0A287B0P6 F1SE26 A0A5G2QZY6 F1RRA6 F1S2F6 Q29380

## Sheet: Up Pathway2Protein
KEGG pathway	Fisher's exact test p value	Fold Enrichment	Protein accession	Position	Amino acid	Fts/Fs Ratio	Fts/Fs P value	Regulated Type	Protein description	Gene name	KEGG KO No.	Localization probability	PEP	Score	Charge	Modified sequence	Mass error [ppm]	Fts_1	Fts_2	Fts_3	Fs_1	Fs_2	Fs_3
map00010 Glycolysis / Gluconeogenesis	0.0361063	1.51	A0A287ADK3	409	K	17.969	0.0215392	Up	Aldehyde dehydrogenase (NAD(+)) OS=Sus scrofa OX=9823 GN=ALDH7A1 PE=1 SV=1	ALDH7A1	K14085	1	5.53261e-40	301.93	3	FK(1)NEDEVFAWNNEVK	-0.20014	1.56962	0.998956	2.25255	0.152374	0.0264957
map00010 Glycolysis / Gluconeogenesis	0.0361063	1.51	A0A287ADK3	322	K	11.332	0.000279857	Up	Aldehyde dehydrogenase (NAD(+)) OS=Sus scrofa OX=9823 GN=ALDH7A1 PE=1 SV=1	ALDH7A1	K14085	1	0.00984518	102.95	2	LTK(1)AYAQIR	-0.33877	1.5294	2.12202	1.86203	0.224637	0.125655	0.136265
map00010 Glycolysis / Gluconeogenesis	0.0361063	1.51	A0A286ZYX8	334	K	6.791	0.00515911	Up	Fructose-bisphosphate aldolase OS=Sus scrofa OX=9823 GN=ALDOA PE=1 SV=2	ALDOA	K01623	1	0.000276715	155.75	2	AAQEEYVK(1)R	-0.10553	1.26678	1.10946	2.85363	0.319463	0.261684	0.188978
map00010 Glycolysis / Gluconeogenesis	0.0361063	1.51	A0A286ZYX8	346	K	13.397	8.81668e-05	Up	Fructose-bisphosphate aldolase OS=Sus scrofa OX=9823 GN=ALDOA PE=1 SV=2	ALDOA	K01623	1	1.8246e-68	350.18	2	ALANSLACQGK(1)YTPSGK	-0.050506	1.53952	1.70934	2.33438	0.143585	0.159933	0.113241
map00010 Glycolysis / Gluconeogenesis	0.0361063	1.51	A0A286ZYX8	234	K	2.381	0.0415831	Up	Fructose-bisphosphate aldolase OS=Sus scrofa OX=9823 GN=ALDOA PE=1 SV=2	ALDOA	K01623	1	2.95095e-13	158.67	3	ALSDHHIYLEGTLLK(1)PNMVTPGHACTQK	-0.01806	1.89148	0.891527	1.44233	0.394682	0.708463	0.671513
map00010 Glycolysis / Gluconeogenesis	0.0361063	1.51	P50578	263	K	2.451	0.0105	Up	Aldo-keto reductase family 1 member A1 OS=Sus scrofa OX=9823 GN=AKR1A1 PE=1 SV=3	AKR1A1	K00002	1	0.0014477	123.63	2	VICIPK(1)SVTPSR	0.036574	1.14625	1.43403	1.68123	0.713453	0.408296	0.616732
map00010 Glycolysis / Gluconeogenesis	0.0361063	1.51	A0A5G2QES7	99	K	3.086	0.0307178	Up	S-(hydroxymethyl)glutathione dehydrogenase OS=Sus scrofa OX=9823 GN=ADH5 PE=1 SV=1	ADH5	K00121	1	0.00314749	114.5	2	FCLNPK(1)TNLCQK	-1.2218	1.13829	1.12488	2.26838	0.75765	0.390613	0.32019
map00010 Glycolysis / Gluconeogenesis	0.0361063	1.51	A0A287B2H7	43	K	6.535	0.0122783	Up	L-lactate dehydrogenase OS=Sus scrofa OX=9823 GN=LDHA PE=3 SV=1	LDHA	K00016	1	2.50729e-11	191.95	3	DQLIHNLLK(1)EEHVPHNK	-0.46433	1.51358	1.54076	2.14935	0.530619	0.150079	0.115608
map00010 Glycolysis / Gluconeogenesis	0.0361063	1.51	A0A287B2H7	27	K	9.41	0.000640596	Up	L-lactate dehydrogenase OS=Sus scrofa OX=9823 GN=LDHA PE=3 SV=1	LDHA	K00016	1	8.76591e-06	204	2	IPFGSK(1)STMATLK	0.09702	1.57728	1.35798	2.48837	0.244205	0.181847	0.150321
map00010 Glycolysis / Gluconeogenesis	0.0361063	1.51	A0A287B2H7	88	K	8.849	0.00786298	Up	L-lactate dehydrogenase OS=Sus scrofa OX=9823 GN=LDHA PE=3 SV=1	LDHA	K00016	1	9.045e-09	201.3	3	LK(1)GEMMDLQHGSLFLR	-0.87575	1.08174	1.39151	2.17644	0.225115	0.125195
map00010 Glycolysis / Gluconeogenesis	0.0361063	1.51	A0A287B2H7	253	K	4.195	0.0188506	Up	L-lactate dehydrogenase OS=Sus scrofa OX=9823 GN=LDHA PE=3 SV=1	LDHA	K00016	1	0.000666693	98.572	3	NLHPELGTDADK(1)EHWK	0.4551	1.43181	0.955315	2.45789	0.557872	0.36457	0.232546
map00010 Glycolysis / Gluconeogenesis	0.0361063	1.51	A0A287B2H7	105	K	3.079	0.0390578	Up	L-lactate dehydrogenase OS=Sus scrofa OX=9823 GN=LDHA PE=3 SV=1	LDHA	K00016	1	0.0116506	110.79	2	TPK(1)IVSGK	-1.0115	1.08917	1.65129	1.36967	0.61528		0.274596
map00010 Glycolysis / Gluconeogenesis	0.0361063	1.51	A0A287B2H7	346	K	4.975	0.00557657	Up	L-lactate dehydrogenase OS=Sus scrofa OX=9823 GN=LDHA PE=3 SV=1	LDHA	K00016	1	7.50937e-05	156.48	2	VTLTPEEEAHLK(1)K	-0.11169	1.82187		2.01984	0.517976	0.285752	0.354564
map00010 Glycolysis / Gluconeogenesis	0.0361063	1.51	Q2XQV4	432	K	9.995	0.00100617	Up	Aldehyde dehydrogenase, mitochondrial OS=Sus scrofa OX=9823 GN=ALDH2 PE=2 SV=1	ALDH2	K00128	1	0.000171453	152.34	2	FK(1)TIEEVIGR	0.50264	1.99671	2.16627	1.29131	0.17112	0.119906	0.254688
map00010 Glycolysis / Gluconeogenesis	0.0361063	1.51	Q2XQV4	379	K	12.974	0.00838091	Up	Aldehyde dehydrogenase, mitochondrial OS=Sus scrofa OX=9823 GN=ALDH2 PE=2 SV=1	ALDH2	K00128	1	0.0325645	76.827	2	ILGYIK(1)SGK	-0.12652	1.15901	1.47018	2.12645	0.176825		0.0675384
map00010 Glycolysis / Gluconeogenesis	0.0361063	1.51	Q2XQV4	372	K	9.488	0.00431005	Up	Aldehyde dehydrogenase, mitochondrial OS=Sus scrofa OX=9823 GN=ALDH2 PE=2 SV=1	ALDH2	K00128	1	2.41837e-50	323.66	3	TEQGPQIDETQFK(1)K	-0.047026	1.28049	2.31628	1.83114	0.340705	0.103428	0.127952
map00010 Glycolysis / Gluconeogenesis	0.0361063	1.51	Q2XQV4	280	K	23.305	0.000824426	Up	Aldehyde dehydrogenase, mitochondrial OS=Sus scrofa OX=9823 GN=ALDH2 PE=2 SV=1	ALDH2	K00128	1	7.71847e-125	406.71	2	VAFTGSTEVGHLIQVAAGK(1)SNLK	-0.42648	1.48516	2.13671	1.23907	0.078186	0.0608686
map00010 Glycolysis / Gluconeogenesis	0.0361063	1.51	Q2XQV4	159	K	13.142	0.0225955	Up	Aldehyde dehydrogenase, mitochondrial OS=Sus scrofa OX=9823 GN=ALDH2 PE=2 SV=1	ALDH2	K00128	1	0.000621756	134.59	2	YYAGWADK(1)YHGK	-1.8788	0.940432	0.941935	2.87624	0.170285	0.0711114
map00010 Glycolysis / Gluconeogenesis	0.0361063	1.51	A0A288CFT0	197	K	19.803	0.00647645	Up	Triosephosphate isomerase OS=Sus scrofa OX=9823 GN=TPI1 PE=1 SV=1	TPI1	K01803	1	1.14588e-11	198.87	2	DWNK(1)VVLAYEPVWAIGTGK	-0.10375	1.36588	0.935561	3.41015	0.187713	0.0478739	0.0528277
map00010 Glycolysis / Gluconeogenesis	0.0361063	1.51	A0A288CFT0	212	K	18.751	0.00428896	Up	Triosephosphate isomerase OS=Sus scrofa OX=9823 GN=TPI1 PE=1 SV=1	TPI1	K01803	1	8.1557e-47	261.82	3	VVLAYEPVWAIGTGK(1)TATPQQAQEVHEK	0.097209	0.87018	1.45861	3.36743	0.16581	0.069041	0.0689358
map00010 Glycolysis / Gluconeogenesis	0.0361063	1.51	A0A288CFT0	275	K	5.161	0.00871995	Up	Triosephosphate isomerase OS=Sus scrofa OX=9823 GN=TPI1 PE=1 SV=1	TPI1	K01803	1	5.29723e-11	138.36	3	ELASQPDVDGFLVGGASLK(1)PEFVDIINAK	0.2365	1.12545	1.38587	1.91667	0.353353		0.218663
map00010 Glycolysis / Gluconeogenesis	0.0361063	1.51	A0A288CFT0	231	K	10.596	0.0015008	Up	Triosephosphate isomerase OS=Sus scrofa OX=9823 GN=TPI1 PE=1 SV=1	TPI1	K01803	1	4.00474e-65	338.14	3	LRGWLK(1)THVSEAVAQSTR	-1.2846	2.1842	1.62926	1.66911	0.277105	0.141203	0.0991147
map00010 Glycolysis / Gluconeogenesis	0.0361063	1.51	A0A288CFT0	43	K	4.625	0.00548994	Up	Triosephosphate isomerase OS=Sus scrofa OX=9823 GN=TPI1 PE=1 SV=1	TPI1	K01803	1	0.000224311	168.45	2	K(1)FFVGGNWK	-0.28433	1.30716	1.12646	2.49979	0.279981	0.417388	0.36922
map00010 Glycolysis / Gluconeogenesis	0.0361063	1.51	A0A288CFT0	96	K	5.781	0.0114108	Up	Triosephosphate isomerase OS=Sus scrofa OX=9823 GN=TPI1 PE=1 SV=1	TPI1	K01803	1	2.86278e-06	205.13	3	LDPK(1)IAVAAQNCYK	0.097927	1.76894	1.38514	1.96105	0.551205	0.132455	0.201207
map00010 Glycolysis / Gluconeogenesis	0.0361063	1.51	I3LK59	343	K	3.171	0.00999385	Up	2-phospho-D-glycerate hydro-lyase OS=Sus scrofa OX=9823 GN=ENO1 PE=1 SV=3	ENO1	K01689	1	1.26995e-22	220.86	3	SCNCLLLK(1)VNQIGSVTESLQACK	-0.37956	1.01624	1.32546	2.21966	0.440753	0.44856	0.549329
map00010 Glycolysis / Gluconeogenesis	0.0361063	1.51	I3LK59	28	K	3.349	0.00761987	Up	2-phospho-D-glycerate hydro-lyase OS=Sus scrofa OX=9823 GN=ENO1 PE=1 SV=3	ENO1	K01689	1	7.68637e-83	357.91	2	GNPTVEVDLHTAK(1)GLFR	-0.58225	1.35256	1.5779	1.68993	0.704122	0.351704	0.323785
map00010 Glycolysis / Gluconeogenesis	0.0361063	1.51	I3LK59	281	K	2.912	0.0043442	Up	2-phospho-D-glycerate hydro-lyase OS=Sus scrofa OX=9823 GN=ENO1 PE=1 SV=3	ENO1	K01689	1	5.03185e-07	170.18	3	YISPDQLADLYK(1)SFIR	0.23146	1.42616	1.2829	1.35942		0.547818	0.383702
map00010 Glycolysis / Gluconeogenesis	0.0361063	1.51	A0A5G2QIE6	270	K	8.54	0.0212944	Up	Acetyltransferase component of pyruvate dehydrogenase complex OS=Sus scrofa OX=9823 GN=DLAT PE=1 SV=1	DLAT	K00627	1	4.7975e-11	229.29	2	GIDLTQIK(1)GTGPDGR	-0.11319	1.09551	1.33998	2.20244	0.27587	0.0862052
map00010 Glycolysis / Gluconeogenesis	0.0361063	1.51	A0A5G2QIE6	367	K	18.394	2.74021e-05	Up	Acetyltransferase component of pyruvate dehydrogenase complex OS=Sus scrofa OX=9823 GN=DLAT PE=1 SV=1	DLAT	K00627	1	6.71423e-05	143.4	2	SK(1)ISVNDFIIK	0.035448	1.45822	2.10129	2.13112	0.0930524	0.105726	0.110598
map00010 Glycolysis / Gluconeogenesis	0.0361063	1.51	A0A5G2QPK6	58	K	14.471	0.00105459	Up	Dihydrolipoyl dehydrogenase OS=Sus scrofa OX=9823 GN=DLD PE=1 SV=1	DLD	K00382	1	6.98919e-05	196.48	2	AAQLGFK(1)TVCIEK	0.0011054	1.63951	1.56697	2.40569	0.205739	0.0759641	0.106127
map00010 Glycolysis / Gluconeogenesis	0.0361063	1.51	A0A5G2QPK6	96	K	7.669	0.00101237	Up	Dihydrolipoyl dehydrogenase OS=Sus scrofa OX=9823 GN=DLD PE=1 SV=1	DLD	K00382	1	6.69026e-49	313.04	4	ALLNNSHYYHMAHGK(1)DFASR	0.81498	1.90275	1.34769	2.05746	0.18081	0.180116	0.331169
map00010 Glycolysis / Gluconeogenesis	0.0361063	1.51	A0A5G2QPK6	135	K	2.712	0.0179189	Up	Dihydrolipoyl dehydrogenase OS=Sus scrofa OX=9823 GN=DLD PE=1 SV=1	DLD	K00382	1	2.83008e-140	407.16	3	SNAVK(1)ALTGGIAHLFK(1)QNK	-0.511	1.39969	1.94509	1.03871	0.37931	0.71524	0.52196
map00010 Glycolysis / Gluconeogenesis	0.0361063	1.51	A0A5G2QPK6	409	K	4.416	0.00806848	Up	Dihydrolipoyl dehydrogenase OS=Sus scrofa OX=9823 GN=DLD PE=1 SV=1	DLD	K00382	1	9.81057e-41	315.21	2	EEGIEYK(1)VGK	0.0090722	1.65767	1.73328	1.50127	0.597975	0.312334	0.197473
map00010 Glycolysis / Gluconeogenesis	0.0361063	1.51	A0A5G2QPK6	269	K	10.152	0.000750656	Up	Dihydrolipoyl dehydrogenase OS=Sus scrofa OX=9823 GN=DLD PE=1 SV=1	DLD	K00382	1	0.00021351	178.55	2	LNTK(1)VIGATK	-0.50256	1.41263	1.84138	2.20799	0.246217	0.175624	0.11616
map00010 Glycolysis / Gluconeogenesis	0.0361063	1.51	A0A5G2QPK6	338	K	5.662	0.00569049	Up	Dihydrolipoyl dehydrogenase OS=Sus scrofa OX=9823 GN=DLD PE=1 SV=1	DLD	K00382	1	2.12613e-09	154.65	3	FQTK(1)IPNIYAIGDVVAGPMLAHK	-0.4543	1.04519	1.32725	2.7269	0.242605	0.311758	0.346298
map00010 Glycolysis / Gluconeogenesis	0.0361063	1.51	A0A5G2QPK6	259	K	4.306	0.00171738	Up	Dihydrolipoyl dehydrogenase OS=Sus scrofa OX=9823 GN=DLD PE=1 SV=1	DLD	K00382	1	0.000942284	135.83	2	ILQK(1)QGFK(1)FK	-0.29711	1.38859	1.8666	1.61407	0.515362	0.282005	0.333363
map00010 Glycolysis / Gluconeogenesis	0.0361063	1.51	A0A5G2QPK6	151	K	12.703	0.000528701	Up	Dihydrolipoyl dehydrogenase OS=Sus scrofa OX=9823 GN=DLD PE=1 SV=1	DLD	K00382	1	5.05413e-10	201.61	3	ITGK(1)NQVTATK(1)ADGSTEVINTK	0.16389	1.75435	1.80692	2.00089	0.222108	0.0946223	0.121115
map00010 Glycolysis / Gluconeogenesis	0.0361063	1.51	A0A5G2QPK6	158	K	21.78	0.00019812	Up	Dihydrolipoyl dehydrogenase OS=Sus scrofa OX=9823 GN=DLD PE=1 SV=1	DLD	K00382	1	9.13913e-100	377.19	2	NQVTATK(1)ADGSTEVINTK	-0.156	1.61789	2.19801	1.92072	0.121481	0.0855181	0.0563852
map00010 Glycolysis / Gluconeogenesis	0.0361063	1.51	A0A5G2QPK6	119	K	12.123	0.00472041	Up	Dihydrolipoyl dehydrogenase OS=Sus scrofa OX=9823 GN=DLD PE=1 SV=1	DLD	K00382	1	9.06167e-05	179.1	2	MMEQK(1)SNAVK	-0.32445	1.39617	0.839096	3.30751	0.181401	0.130613	0.145213
map00010 Glycolysis / Gluconeogenesis	0.0361063	1.51	A0A5G2QPK6	124	K	11.949	0.0040856	Up	Dihydrolipoyl dehydrogenase OS=Sus scrofa OX=9823 GN=DLD PE=1 SV=1	DLD	K00382	1	1.49524e-09	167.14	3	SNAVK(1)ALTGGIAHLFK(1)QNK	-0.511	2.07125	0.955968	1.70857	0.123067	0.141145
map00010 Glycolysis / Gluconeogenesis	0.0361063	1.51	A0A5G2QPK6	402	K	2.117	0.0256796	Up	Dihydrolipoyl dehydrogenase OS=Sus scrofa OX=9823 GN=DLD PE=1 SV=1	DLD	K00382	1	6.03025e-06	209.19	2	SEEQLK(1)EEGIEYK	0.28517	1.32037	1.83202	0.922558	0.625911	0.712405	0.586733
map00010 Glycolysis / Gluconeogenesis	0.0361063	1.51	A0A5G2R718	34	K	6.023	0.0316931	Up	Pyruvate dehydrogenase E1 component subunit beta OS=Sus scrofa OX=9823 GN=PDHB PE=1 SV=1	PDHB	K00162	1	1.04594e-20	167.61	4	DAINQGMDEELERDEK(1)VFLLGEEVAQYDGAYK	-0.31808	1.03207	2.48971	0.97998	0.326682		0.171565
map00010 Glycolysis / Gluconeogenesis	0.0361063	1.51	A0A5G2R718	50	K	6.433	0.000338382	Up	Pyruvate dehydrogenase E1 component subunit beta OS=Sus scrofa OX=9823 GN=PDHB PE=1 SV=1	PDHB	K00162	1	2.1295e-55	321.67	3	VFLLGEEVAQYDGAYK(1)VSR	-0.11923	1.30726	1.5305	1.69276	0.241922	0.227567
map00010 Glycolysis / Gluconeogenesis	0.0361063	1.51	A0A5G2R718	336	K	25.703	0.000583753	Up	Pyruvate dehydrogenase E1 component subunit beta OS=Sus scrofa OX=9823 GN=PDHB PE=1 SV=1	PDHB	K00162	1	0.0255332	92.307	3	ILEDNSVPQVK(1)DIIFAIK(1)K	0.31701	1.47854	1.75327	2.5435	0.122807	0.0521125	0.0497732
map00010 Glycolysis / Gluconeogenesis	0.0361063	1.51	A0A5G2R718	170	K	11.034	0.000616898	Up	Pyruvate dehydrogenase E1 component subunit beta OS=Sus scrofa OX=9823 GN=PDHB PE=1 SV=1	PDHB	K00162	1	0.00690861	120.65	2	GLIK(1)SAIR	-0.50635	1.84458	1.33623	2.32059	0.233349	0.133349	0.131903
map00010 Glycolysis / Gluconeogenesis	0.0361063	1.51	A0A5G2R718	240	K	6.879	0.0205121	Up	Pyruvate dehydrogenase E1 component subunit beta OS=Sus scrofa OX=9823 GN=PDHB PE=1 SV=1	PDHB	K00162	1	2.61644e-25	205.84	4	PVGHCLEAATVLSK(1)EGIECEVINMR	-0.21928	1.99621	1.82199	0.740027	0.215947		0.22583
map00010 Glycolysis / Gluconeogenesis	0.0361063	1.51	A0A5G2R718	166	K	14.707	0.00444135	Up	Pyruvate dehydrogenase E1 component subunit beta OS=Sus scrofa OX=9823 GN=PDHB PE=1 SV=1	PDHB	K00162	1	8.42777e-07	162.68	3	VVSPWSSEDAK(1)GLIK	-0.13568	1.72959		2.80764	0.214388	0.151972	0.0964119
map00010 Glycolysis / Gluconeogenesis	0.0361063	1.51	F1SUF2	829	K	4.145	0.0183163	Up	Hexokinase OS=Sus scrofa OX=9823 GN=HK1 PE=1 SV=4	HK1	K00844	1	0.00228463	122.19	2	TVCGVVSK(1)R	-1.1759	1.63633		2.03518	0.666992	0.344027	0.317473
map00010 Glycolysis / Gluconeogenesis	0.0361063	1.51	F1SUF2	489	K	2.587	0.0131535	Up	Hexokinase OS=Sus scrofa OX=9823 GN=HK1 PE=1 SV=4	HK1	K00844	1	0.000674092	182.13	2	DMLLEVK(1)R	0.42517	1.10817	1.13981	2.07915	0.536716	0.625178	0.510974
map00010 Glycolysis / Gluconeogenesis	0.0361063	1.51	F1SUF2	48	K	5.221	0.000419509	Up	Hexokinase OS=Sus scrofa OX=9823 GN=HK1 PE=1 SV=4	HK1	K00844	1	0.00917649	125.31	2	EMK(1)NGLSR	0.58246	1.29211	1.63502	2.10837	0.357652	0.301056	0.305792
map00010 Glycolysis / Gluconeogenesis	0.0361063	1.51	F1SUF2	764	K	8.566	0.00169788	Up	Hexokinase OS=Sus scrofa OX=9823 GN=HK1 PE=1 SV=4	HK1	K00844	1	0.000222132	163.9	2	NILIDFTK(1)R	-0.61003	1.80752	1.57856	1.98667	0.340037	0.134225	0.152986
map00010 Glycolysis / Gluconeogenesis	0.0361063	1.51	F1SUF2	419	K	8.978	0.00115314	Up	Hexokinase OS=Sus scrofa OX=9823 GN=HK1 PE=1 SV=4	HK1	K00844	1	1.86313e-138	424.41	2	TTVGVDGSLYK(1)THPQYSR	0.076834	1.70899	1.49602	2.19367	0.306949	0.153352	0.141025
map00010 Glycolysis / Gluconeogenesis	0.0361063	1.51	I3LCI2	244	K	14.326	7.06486e-05	Up	Pyruvate dehydrogenase E1 component subunit alpha OS=Sus scrofa OX=9823 GN=PDHA1 PE=1 SV=2	PDHA1	K00161	1	0.000402517	172.21	2	AAASTDYYK(1)R	0.24715	2.1465	1.89941	1.56258	0.162102	0.104595	0.124807
map00010 Glycolysis / Gluconeogenesis	0.0361063	1.51	I3LCI2	83	K	2.468	0.0111998	Up	Pyruvate dehydrogenase E1 component subunit alpha OS=Sus scrofa OX=9823 GN=PDHA1 PE=1 SV=2	PDHA1	K00161	1	2.11455e-13	245.15	3	RMELK(1)ADQLYK(1)QK	-0.75819	1.26937	1.80276	1.19758	0.410631	0.633634	0.686031
map00010 Glycolysis / Gluconeogenesis	0.0361063	1.51	I3LCI2	85	K	9.005	0.000162366	Up	Pyruvate dehydrogenase E1 component subunit alpha OS=Sus scrofa OX=9823 GN=PDHA1 PE=1 SV=2	PDHA1	K00161	1	0.000436708	138.22	2	ADQLYK(1)QK(1)IIR	-0.94509	1.44813	1.61689	2.33528	0.182028	0.226178	0.19149
map00010 Glycolysis / Gluconeogenesis	0.0361063	1.51	I3LCI2	149	K	30.357	0.00264492	Up	Pyruvate dehydrogenase E1 component subunit alpha OS=Sus scrofa OX=9823 GN=PDHA1 PE=1 SV=2	PDHA1	K00161	1	0.000497327	166.66	2	GK(1)GGSMHMYAK	-0.26957	1.20887	1.1745	2.50919		0.0416124	0.0658308
map00010 Glycolysis / Gluconeogenesis	0.0361063	1.51	I3LCI2	77	K	7.793	0.000756203	Up	Pyruvate dehydrogenase E1 component subunit alpha OS=Sus scrofa OX=9823 GN=PDHA1 PE=1 SV=2	PDHA1	K00161	1	2.11455e-13	245.15	3	RMELK(1)ADQLYK(1)QK	-0.75819	1.64932	1.96265	1.70571	0.290556	0.25052	0.141251
map00010 Glycolysis / Gluconeogenesis	0.0361063	1.51	I3LCI2	321	K	7.822	0.000142572	Up	Pyruvate dehydrogenase E1 component subunit alpha OS=Sus scrofa OX=9823 GN=PDHA1 PE=1 SV=2	PDHA1	K00161	1	7.16903e-05	200.93	2	SK(1)SDPIMLLK(1)DR	-0.73938	1.52532	2.28207	1.51246	0.220389	0.247774	0.211984
map00010 Glycolysis / Gluconeogenesis	0.0361063	1.51	I3LCI2	277	K	5.209	0.00236988	Up	Pyruvate dehydrogenase E1 component subunit alpha OS=Sus scrofa OX=9823 GN=PDHA1 PE=1 SV=2	PDHA1	K00161	1	2.82417e-14	251.03	2	SGK(1)GPILMELQTYR	2.0211	1.31828	1.80506	1.30939		0.244799	0.322474
map00010 Glycolysis / Gluconeogenesis	0.0361063	1.51	I3LCI2	313	K	13.059	0.000364323	Up	Pyruvate dehydrogenase E1 component subunit alpha OS=Sus scrofa OX=9823 GN=PDHA1 PE=1 SV=2	PDHA1	K00161	1	4.7682e-05	200.93	2	SK(1)SDPIMLLK(1)DR	-0.73938	1.98833	2.05998	1.5249	0.20686	0.115592	0.104335
map00010 Glycolysis / Gluconeogenesis	0.0361063	1.51	F1RM74	147	K	1.994	0.0125941	Up	Glyceraldehyde-3-phosphate dehydrogenase OS=Sus scrofa OX=9823 GN=GAPDHS PE=1 SV=3	GAPDHS	K10705	1	0.000153924	147.51	2	EINVFQCK(1)QPK	1.3588	1.2332		1.43087	0.652366	0.683567
map00010 Glycolysis / Gluconeogenesis	0.0361063	1.51	F1RM74	294	K	3.469	0.00569161	Up	Glyceraldehyde-3-phosphate dehydrogenase OS=Sus scrofa OX=9823 GN=GAPDHS PE=1 SV=3	GAPDHS	K10705	1	0.000294522	168.23	2	GK(1)LTGMAFR	0.045488	1.27916	1.28329	2.09482	0.581429	0.332827	0.428462
map00010 Glycolysis / Gluconeogenesis	0.0361063	1.51	F1RM74	130	K	12.66	0.00241588	Up	Glyceraldehyde-3-phosphate dehydrogenase OS=Sus scrofa OX=9823 GN=GAPDHS PE=1 SV=3	GAPDHS	K10705	1	0.000297908	170.95	2	GTVEYK(1)NDK	-0.81293	1.34678	1.169	3.04498	0.210911	0.122998	0.105329
map00010 Glycolysis / Gluconeogenesis	0.0361063	1.51	F1RM74	115	K	3.82	0.0475356	Up	Glyceraldehyde-3-phosphate dehydrogenase OS=Sus scrofa OX=9823 GN=GAPDHS PE=1 SV=3	GAPDHS	K10705	1	1.06131e-06	111.44	3	VVAVNDPFIDPEYMVYMFK(1)YDSTHGR	-0.17391	1.49391	0.848235	1.91499		0.23936	0.503503
map00010 Glycolysis / Gluconeogenesis	0.0361063	1.51	F1S4S3	20	K	5.751	0.00749399	Up	2-phospho-D-glycerate hydro-lyase OS=Sus scrofa OX=9823 GN=ENO4 PE=3 SV=4	ENO4	K01689	1	6.80195e-05	177.7	2	LK(1)QQALEYYR	-0.02886	1.56715	1.0337	2.51044	0.447789	0.216263	0.224661
map00010 Glycolysis / Gluconeogenesis	0.0361063	1.51	F1SFX0	228	K	7.402	0.0103166	Up	L-lactate dehydrogenase OS=Sus scrofa OX=9823 GN=LDHC PE=2 SV=2	LDHC	K00016	1	3.09141e-114	393.33	2	DQWK(1)NIHK	-0.90744	1.1003	1.10626	2.38033	0.220709	0.192398
map00010 Glycolysis / Gluconeogenesis	0.0361063	1.51	F1SFX0	81	K	3.789	0.00124263	Up	L-lactate dehydrogenase OS=Sus scrofa OX=9823 GN=LDHC PE=2 SV=2	LDHC	K00016	1	3.39125e-06	202.27	2	IVSGK(1)DYSVSANSK	-0.80078	1.16144	1.68393	1.90164	0.469981	0.405258	0.377748
map00010 Glycolysis / Gluconeogenesis	0.0361063	1.51	F1SFX0	224	K	7.918	0.00282901	Up	L-lactate dehydrogenase OS=Sus scrofa OX=9823 GN=LDHC PE=2 SV=2	LDHC	K00016	1	5.23224e-06	218.58	2	LGTDSDK(1)DQWK	0.052794	1.91094	1.2493	2.16694	0.356349	0.141774	0.174711
map00010 Glycolysis / Gluconeogenesis	0.0361063	1.51	F1SFX0	217	K	9.568	0.00607823	Up	L-lactate dehydrogenase OS=Sus scrofa OX=9823 GN=LDHC PE=2 SV=2	LDHC	K00016	1	1.48714e-15	251.84	2	TLDPK(1)LGTDSDKDQWK	0.3983	2.12055	2.20182		0.348453	0.181568	0.147612
map00010 Glycolysis / Gluconeogenesis	0.0361063	1.51	F1SFX0	278	K	2.695	0.0275503	Up	L-lactate dehydrogenase OS=Sus scrofa OX=9823 GN=LDHC PE=2 SV=2	LDHC	K00016	1	1.22758e-06	178.1	3	VHPVSTMVK(1)GLYGIK	-0.54755	1.1205	1.22741	2.02824	0.774817	0.504547	0.344485
map00010 Glycolysis / Gluconeogenesis	0.0361063	1.51	P00355	3	K	2.516	0.00208899	Up	Glyceraldehyde-3-phosphate dehydrogenase OS=Sus scrofa OX=9823 GN=GAPDH PE=1 SV=4	GAPDH	K00134	1	0.0112771	104.44	2	VK(1)VGVNGFGR	-0.14158	1.40417	1.72818		0.662679	0.581973	0.622998
map00010 Glycolysis / Gluconeogenesis	0.0361063	1.51	Q1KYT0	80	K	12.668	0.0019594	Up	Beta-enolase OS=Sus scrofa OX=9823 GN=ENO3 PE=2 SV=1	ENO3	K01689	1	0.00811492	93.111	2	TLGPALLEK(1)K	-1.5338	1.60927	1.67882	1.46193	0.164851	0.0851296
map00010 Glycolysis / Gluconeogenesis	0.0361063	1.51	Q1KYT0	28	K	2.74	0.0413296	Up	Beta-enolase OS=Sus scrofa OX=9823 GN=ENO3 PE=2 SV=1	ENO3	K01689	1	7.49674e-05	121.31	3	GNPTVEVDLHTAK(1)GR	0.86584	1.59564	1.59383	0.83211	0.474158	0.504258
map00020 Citrate cycle (TCA cycle)	5.65588e-06	2.11	A0A286ZKX2	300	K	11.202	0.0055965	Up	Citrate synthase OS=Sus scrofa OX=9823 GN=CS PE=1 SV=2	CS	K01647	1	1.73459e-28	278.46	3	EFALK(1)HLPHDPMFK(1)LVAQLYK	-1.0265	1.42984	1.06203	2.22729	0.17496	0.105883
map00020 Citrate cycle (TCA cycle)	5.65588e-06	2.11	A0A286ZKX2	261	K	6.967	0.00107078	Up	Citrate synthase OS=Sus scrofa OX=9823 GN=CS PE=1 SV=2	CS	K01647	1	0.000435385	180.19	2	EVGK(1)DVSDEK(1)LR	0.024181	1.6625	1.21279	1.68807		0.199637	0.237013
map00020 Citrate cycle (TCA cycle)	5.65588e-06	2.11	A0A286ZKX2	10	K	3.416	0.0103028	Up	Citrate synthase OS=Sus scrofa OX=9823 GN=CS PE=1 SV=2	CS	K01647	1	2.35703e-44	311.16	3	GMK(1)GLVYETSVLDPDEGIR	-0.175	1.84707	0.987122	1.80725	0.605377	0.415618	0.337565
map00020 Citrate cycle (TCA cycle)	5.65588e-06	2.11	A0A286ZKX2	149	K	15.578	0.00305084	Up	Citrate synthase OS=Sus scrofa OX=9823 GN=CS PE=1 SV=2	CS	K01647	1	0.000178216	176.41	2	LPCVAAK(1)IYR	-1.1435	1.45216	1.36474	1.97791	0.139435	0.0657563
map00020 Citrate cycle (TCA cycle)	5.65588e-06	2.11	A0A286ZKX2	384	K	20.521	0.000906857	Up	Citrate synthase OS=Sus scrofa OX=9823 GN=CS PE=1 SV=2	CS	K01647	1	0.000201952	199.03	2	PK(1)SMSTDGLIK	-0.20974	1.44115	1.61269	1.78883	0.100677	0.0566491
map00020 Citrate cycle (TCA cycle)	5.65588e-06	2.11	A0A286ZQY6	202	K	16.56	6.83693e-05	Up	Isocitrate dehydrogenase [NAD] subunit, mitochondrial OS=Sus scrofa OX=9823 GN=IDH3A PE=1 SV=2	IDH3A	K00030	1	0.000775515	131.5	2	EVAENCK(1)DIK	-0.057496	1.66054	1.51005	2.48772	0.124701	0.102941	0.11405
map00020 Citrate cycle (TCA cycle)	5.65588e-06	2.11	A0A286ZQY6	156	K	10.595	3.43544e-05	Up	Isocitrate dehydrogenase [NAD] subunit, mitochondrial OS=Sus scrofa OX=9823 GN=IDH3A PE=1 SV=2	IDH3A	K00030	1	0.000196834	185.84	2	LITEGASK(1)R	0.14564	1.60615	2.18565	1.69073	0.188416	0.151315	0.177734
map00020 Citrate cycle (TCA cycle)	5.65588e-06	2.11	A0A287BA45	76	K	5.313	5.65192e-05	Up	Succinate--CoA ligase [GDP-forming] subunit beta, mitochondrial OS=Sus scrofa OX=9823 GN=SUCLG2 PE=3 SV=1	SUCLG2	K01900	1	0.00626994	103.7	2	GK(1)GVFSSGLK	-2.2376	1.6977	1.6271	1.72476	0.36339	0.32192	0.265131
map00020 Citrate cycle (TCA cycle)	5.65588e-06	2.11	A0A287BA45	254	K	2.573	0.0024603	Up	Succinate--CoA ligase [GDP-forming] subunit beta, mitochondrial OS=Sus scrofa OX=9823 GN=SUCLG2 PE=3 SV=1	SUCLG2	K01900	1	2.61085e-08	172.98	2	QK(1)DIFAMDDK	0.20076	1.14501	1.82339	1.35228	0.570803	0.554345	0.554172
map00020 Citrate cycle (TCA cycle)	5.65588e-06	2.11	P33198	244	K	16.832	0.0140722	Up	Isocitrate dehydrogenase [NADP], mitochondrial (Fragment) OS=Sus scrofa OX=9823 GN=IDH2 PE=1 SV=1	IDH2	K00031	1	0.000874885	182.29	2	HYK(1)TDFDK	-0.066924	1.41234	1.54003	1.85714	0.158154	0.0323341
map00020 Citrate cycle (TCA cycle)	5.65588e-06	2.11	P33198	124	K	13.745	0.00460705	Up	Isocitrate dehydrogenase [NADP], mitochondrial (Fragment) OS=Sus scrofa OX=9823 GN=IDH2 PE=1 SV=1	IDH2	K00031	1	0.00112299	125.53	2	EPIICK(1)NIPR	-0.15798	1.69368	1.62279	2.27661	0.278081	0.0683296	0.0605082
map00020 Citrate cycle (TCA cycle)	5.65588e-06	2.11	P33198	212	K	12.082	0.000725591	Up	Isocitrate dehydrogenase [NADP], mitochondrial (Fragment) OS=Sus scrofa OX=9823 GN=IDH2 PE=1 SV=1	IDH2	K00031	1	0.0187401	82.287	2	K(1)WPLYMSTK	0.51555	1.94529	1.50016	2.09589	0.198715	0.0878225	0.172125
map00020 Citrate cycle (TCA cycle)	5.65588e-06	2.11	P33198	268	K	39.981	0.00151274	Up	Isocitrate dehydrogenase [NADP], mitochondrial (Fragment) OS=Sus scrofa OX=9823 GN=IDH2 PE=1 SV=1	IDH2	K00031	1	3.25207e-16	189.86	2	LIDDMVAQVLK(1)SSGGFVWACK	0.94173	1.85072	2.12604	1.87683	0.102256	0.0210623	0.0230925
map00020 Citrate cycle (TCA cycle)	5.65588e-06	2.11	P33198	251	K	14.552	0.00308018	Up	Isocitrate dehydrogenase [NADP], mitochondrial (Fragment) OS=Sus scrofa OX=9823 GN=IDH2 PE=1 SV=1	IDH2	K00031	1	0.00102623	168.23	2	YK(1)IWYEHR	0.95171	1.63389	1.6516	2.3287	0.239214	0.0916456	0.0549487
map00020 Citrate cycle (TCA cycle)	5.65588e-06	2.11	F1S297	135	K	29.716	0.000285138	Up	Isocitrate dehydrogenase [NAD] subunit, mitochondrial OS=Sus scrofa OX=9823 GN=IDH3G PE=1 SV=3	IDH3G	K00030	1	4.08331e-17	194.88	3	TSLDLYANVIHCK(1)SLPGVVTR	-0.26696	1.56727	1.33169	2.90571	0.0735677	0.0746876	0.0470817
map00020 Citrate cycle (TCA cycle)	5.65588e-06	2.11	F1RK10	157	K	8.372	0.0144662	Up	Succinate--CoA ligase [ADP-forming] subunit beta, mitochondrial OS=Sus scrofa OX=9823 GN=SUCLA2 PE=1 SV=3	SUCLA2	K01900	1	0.000252942	150.81	2	EPIDIVEGIK(1)K	-0.30176	1.08762	1.57797	1.96561	0.269359	0.0994472
map00020 Citrate cycle (TCA cycle)	5.65588e-06	2.11	F1RK10	50	K	9.942	0.000113281	Up	Succinate--CoA ligase [ADP-forming] subunit beta, mitochondrial OS=Sus scrofa OX=9823 GN=SUCLA2 PE=1 SV=3	SUCLA2	K01900	1	0.00101433	127.4	2	GK(1)GTFESGLK	0.097095	1.69445	1.62331	1.36805	0.154362		0.159834
map00020 Citrate cycle (TCA cycle)	5.65588e-06	2.11	F1RK10	35	K	9.408	0.0159815	Up	Succinate--CoA ligase [ADP-forming] subunit beta, mitochondrial OS=Sus scrofa OX=9823 GN=SUCLA2 PE=1 SV=3	SUCLA2	K01900	1	0.00363903	126.39	2	LGSK(1)DVVIK	0.28794	1.3637	1.50613	1.79932	0.259564		0.0712916
map00020 Citrate cycle (TCA cycle)	5.65588e-06	2.11	F1RK10	85	K	9.477	0.0109903	Up	Succinate--CoA ligase [ADP-forming] subunit beta, mitochondrial OS=Sus scrofa OX=9823 GN=SUCLA2 PE=1 SV=3	SUCLA2	K01900	1	0.00142966	132.76	2	LFTK(1)QTGEK	0.70056	1.3525	1.77333	1.54557	0.246634		0.0819707
map00020 Citrate cycle (TCA cycle)	5.65588e-06	2.11	A0A287B410	397	K	11.191	0.000349983	Up	Oxoglutarate dehydrogenase (succinyl-transferring) OS=Sus scrofa OX=9823 GN=OGDH PE=1 SV=1	OGDH	K00164	1	6.66516e-06	204.17	2	AEQFYCGDTEGK(1)K	-1.9287	1.48676	2.05329	1.96778	0.215892	0.111823	0.164455
map00020 Citrate cycle (TCA cycle)	5.65588e-06	2.11	A0A287B410	332	K	12.984	0.00722849	Up	Oxoglutarate dehydrogenase (succinyl-transferring) OS=Sus scrofa OX=9823 GN=OGDH PE=1 SV=1	OGDH	K00164	1	2.14534e-18	187.62	3	ELEQIFCQFDSK(1)LEAADEGSGDVK	0.069913	1.68382	1.85743	2.0297	0.20778	0.183789	0.0374786
map00020 Citrate cycle (TCA cycle)	5.65588e-06	2.11	A0A287B410	856	K	11.371	0.029403	Up	Oxoglutarate dehydrogenase (succinyl-transferring) OS=Sus scrofa OX=9823 GN=OGDH PE=1 SV=1	OGDH	K00164	1	0.000954733	176.62	2	KPLIIFTPK(1)SLLR	0.32948	1.17411	1.22931	2.31967	0.233372	0.043537
map00020 Citrate cycle (TCA cycle)	5.65588e-06	2.11	A0A287B410	530	K	7.263	0.0333406	Up	Oxoglutarate dehydrogenase (succinyl-transferring) OS=Sus scrofa OX=9823 GN=OGDH PE=1 SV=1	OGDH	K00164	1	0.0188811	117.62	2	QK(1)PVLQK	0.070136	1.42474	2.09118		0.318124		0.165958
map00020 Citrate cycle (TCA cycle)	5.65588e-06	2.11	A0A287B410	74	K	27.141	8.5868e-06	Up	Oxoglutarate dehydrogenase (succinyl-transferring) OS=Sus scrofa OX=9823 GN=OGDH PE=1 SV=1	OGDH	K00164	1	8.29002e-09	236.35	2	SVHK(1)SWDIFFR	0.43754	1.83248	2.0545	1.8998	0.0857363	0.0687417	0.0587335
map00020 Citrate cycle (TCA cycle)	5.65588e-06	2.11	A0A287B410	895	K	22.201	1.3865e-05	Up	Oxoglutarate dehydrogenase (succinyl-transferring) OS=Sus scrofa OX=9823 GN=OGDH PE=1 SV=1	OGDH	K00164	1	6.82848e-11	194.7	2	VIPEDGPAAQNPENVK(1)R	-0.085366	1.66715	2.26572	1.80852	0.0958699	0.0735664	0.089168
map00020 Citrate cycle (TCA cycle)	5.65588e-06	2.11	A0A287B410	560	K	5.441	0.00038105	Up	Oxoglutarate dehydrogenase (succinyl-transferring) OS=Sus scrofa OX=9823 GN=OGDH PE=1 SV=1	OGDH	K00164	1	0.000312515	192.26	2	YDK(1)ICEEAFAR	0.10045	1.66333	1.8309	1.5743	0.403795	0.244742	0.282931
map00020 Citrate cycle (TCA cycle)	5.65588e-06	2.11	A0A287B574	69	K	13.454	0.000809585	Up	Succinate--CoA ligase [ADP/GDP-forming] subunit alpha, mitochondrial OS=Sus scrofa OX=9823 GN=SUCLG1 PE=3 SV=2	SUCLG1	K01899	1	1.5541e-51	318.7	2	GGK(1)THLGLPVFNTVK	-0.4171	2.52201	1.47741	1.58546	0.206454	0.0946707	0.113987
map00020 Citrate cycle (TCA cycle)	5.65588e-06	2.11	A0A287B574	30	K	6.626	0.00102062	Up	Succinate--CoA ligase [ADP/GDP-forming] subunit alpha, mitochondrial OS=Sus scrofa OX=9823 GN=SUCLG1 PE=3 SV=2	SUCLG1	K01899	1	0.000948802	138.4	2	HLYVDK(1)NTK	-2.4741	1.27191	1.864	2.07731	0.35322	0.224493	0.209062
map00020 Citrate cycle (TCA cycle)	5.65588e-06	2.11	A0A287B574	168	K	5.747	0.00102914	Up	Succinate--CoA ligase [ADP/GDP-forming] subunit alpha, mitochondrial OS=Sus scrofa OX=9823 GN=SUCLG1 PE=3 SV=2	SUCLG1	K01899	1	0.00068043	125.31	2	IGIMPGHIHK(1)K	-0.50267	1.50735	1.58892	1.384	0.303875	0.215854
map00020 Citrate cycle (TCA cycle)	5.65588e-06	2.11	A0A287B574	24	K	21.156	0.000678481	Up	Succinate--CoA ligase [ADP/GDP-forming] subunit alpha, mitochondrial OS=Sus scrofa OX=9823 GN=SUCLG1 PE=3 SV=2	SUCLG1	K01899	1	0.0109422	131.03	2	K(1)HLYVDK	-2.3891	1.51417	1.92575	2.28927	0.150025	0.0646773	0.0561104
map00020 Citrate cycle (TCA cycle)	5.65588e-06	2.11	A0A5G2Q7D7	403	K	13.601	0.0052492	Up	Succinate dehydrogenase [ubiquinone] flavoprotein subunit, mitochondrial OS=Sus scrofa OX=9823 GN=SDHA PE=1 SV=1	SDHA	K00234	1	1.52895e-09	143.67	3	EPIPVLPTVHYNMGGIPTNYK(1)GQVLR	0.20989	1.04884	1.53598	2.18155	0.151655	0.0819672
map00020 Citrate cycle (TCA cycle)	5.65588e-06	2.11	A0A5G2Q7D7	618	K	17.909	0.000138406	Up	Succinate dehydrogenase [ubiquinone] flavoprotein subunit, mitochondrial OS=Sus scrofa OX=9823 GN=SDHA PE=1 SV=1	SDHA	K00234	1	9.70185e-38	304.69	2	KHTLSYVDVK(1)TGK	0.94393	1.50972	2.18077	1.99221	0.143476	0.0912927	0.0825322
map00020 Citrate cycle (TCA cycle)	5.65588e-06	2.11	A0A5G2Q7D7	621	K	14.579	0.00224644	Up	Succinate dehydrogenase [ubiquinone] flavoprotein subunit, mitochondrial OS=Sus scrofa OX=9823 GN=SDHA PE=1 SV=1	SDHA	K00234	1	2.22594e-05	201.08	2	TGK(1)VSLEYRPVIDK	-0.32477	1.47654	2.60313	1.5352	0.228119	0.0789367	0.0780722
map00020 Citrate cycle (TCA cycle)	5.65588e-06	2.11	A0A5G2Q7D7	609	K	16.85	0.00329632	Up	Succinate dehydrogenase [ubiquinone] flavoprotein subunit, mitochondrial OS=Sus scrofa OX=9823 GN=SDHA PE=1 SV=1	SDHA	K00234	1	1.2097e-08	230.65	2	K(1)HTLSYVDVK	-0.039667	1.63913	1.22258	2.80215	0.208956	0.068536	0.0586466
map00020 Citrate cycle (TCA cycle)	5.65588e-06	2.11	A0A5G2Q7D7	601	K	18.437	0.000257543	Up	Succinate dehydrogenase [ubiquinone] flavoprotein subunit, mitochondrial OS=Sus scrofa OX=9823 GN=SDHA PE=1 SV=1	SDHA	K00234	1	0.000351671	191.78	2	K(1)PFQEHWR	-0.90598	1.51213	1.74141	1.57198		0.0718538	0.10263
map00020 Citrate cycle (TCA cycle)	5.65588e-06	2.11	A0A5G2Q7D7	502	K	24.072	0.000141869	Up	Succinate dehydrogenase [ubiquinone] flavoprotein subunit, mitochondrial OS=Sus scrofa OX=9823 GN=SDHA PE=1 SV=1	SDHA	K00234	1	5.56749e-115	397.21	3	LSMQK(1)SMQSHAAVFR	-0.31541	1.32691	1.79588	2.6379	0.0826575	0.0655513	0.0911046
map00020 Citrate cycle (TCA cycle)	5.65588e-06	2.11	A0A5G2Q7D7	535	K	28.965	0.000980542	Up	Succinate dehydrogenase [ubiquinone] flavoprotein subunit, mitochondrial OS=Sus scrofa OX=9823 GN=SDHA PE=1 SV=1	SDHA	K00234	1	7.31035e-20	259.18	2	LYGDLQHLK(1)TFDR	0.23783	1.55404	1.48144	2.76429	0.116324	0.0383939	0.0455149
map00020 Citrate cycle (TCA cycle)	5.65588e-06	2.11	A0A5G2Q7D7	632	K	15.588	0.0355643	Up	Succinate dehydrogenase [ubiquinone] flavoprotein subunit, mitochondrial OS=Sus scrofa OX=9823 GN=SDHA PE=1 SV=1	SDHA	K00234	1	9.03941e-143	424.08	4	VSLEYRPVIDK(1)TLNEADCATVPPAIR	0.11992	2.07028	0.951549	1.7731	0.184902		0.0201647
map00020 Citrate cycle (TCA cycle)	5.65588e-06	2.11	A0A5G2Q7D7	152	K	6.259	8.69518e-05	Up	Succinate dehydrogenase [ubiquinone] flavoprotein subunit, mitochondrial OS=Sus scrofa OX=9823 GN=SDHA PE=1 SV=1	SDHA	K00234	1	0.000326422	159.2	2	TEDGK(1)IYQR	-0.53423	1.49227	2.09631	1.58487	0.277814	0.29475	0.253985
map00020 Citrate cycle (TCA cycle)	5.65588e-06	2.11	A0A5G2Q7D7	600	K	11.974	0.00277925	Up	Succinate dehydrogenase [ubiquinone] flavoprotein subunit, mitochondrial OS=Sus scrofa OX=9823 GN=SDHA PE=1 SV=1	SDHA	K00234	1	1.26078e-07	183	3	VDEYDYSKPIQGQQK(1)K	0.4439	1.06576	1.86587	1.80467	0.155521	0.108175
map00020 Citrate cycle (TCA cycle)	5.65588e-06	2.11	A0A5G2QIE6	270	K	8.54	0.0212944	Up	Acetyltransferase component of pyruvate dehydrogenase complex OS=Sus scrofa OX=9823 GN=DLAT PE=1 SV=1	DLAT	K00627	1	4.7975e-11	229.29	2	GIDLTQIK(1)GTGPDGR	-0.11319	1.09551	1.33998	2.20244	0.27587	0.0862052
map00020 Citrate cycle (TCA cycle)	5.65588e-06	2.11	A0A5G2QIE6	367	K	18.394	2.74021e-05	Up	Acetyltransferase component of pyruvate dehydrogenase complex OS=Sus scrofa OX=9823 GN=DLAT PE=1 SV=1	DLAT	K00627	1	6.71423e-05	143.4	2	SK(1)ISVNDFIIK	0.035448	1.45822	2.10129	2.13112	0.0930524	0.105726	0.110598
map00020 Citrate cycle (TCA cycle)	5.65588e-06	2.11	A0A5S6FV10	132	K	5.587	4.02744e-06	Up	Dihydrolipoyllysine-residue succinyltransferase component of 2-oxoglutarate dehydrogenase complex, mitochondrial OS=Sus scrofa OX=9823 GN=DLST PE=3 SV=1	DLST	K00658	1	0.0311311	72.434	2	AK(1)PAEAPAAAAPK	-1.0013	1.58949	1.85452	1.64508	0.311255	0.295046	0.304612
map00020 Citrate cycle (TCA cycle)	5.65588e-06	2.11	A0A5G2QPK6	58	K	14.471	0.00105459	Up	Dihydrolipoyl dehydrogenase OS=Sus scrofa OX=9823 GN=DLD PE=1 SV=1	DLD	K00382	1	6.98919e-05	196.48	2	AAQLGFK(1)TVCIEK	0.0011054	1.63951	1.56697	2.40569	0.205739	0.0759641	0.106127
map00020 Citrate cycle (TCA cycle)	5.65588e-06	2.11	A0A5G2QPK6	96	K	7.669	0.00101237	Up	Dihydrolipoyl dehydrogenase OS=Sus scrofa OX=9823 GN=DLD PE=1 SV=1	DLD	K00382	1	6.69026e-49	313.04	4	ALLNNSHYYHMAHGK(1)DFASR	0.81498	1.90275	1.34769	2.05746	0.18081	0.180116	0.331169
map00020 Citrate cycle (TCA cycle)	5.65588e-06	2.11	A0A5G2QPK6	135	K	2.712	0.0179189	Up	Dihydrolipoyl dehydrogenase OS=Sus scrofa OX=9823 GN=DLD PE=1 SV=1	DLD	K00382	1	2.83008e-140	407.16	3	SNAVK(1)ALTGGIAHLFK(1)QNK	-0.511	1.39969	1.94509	1.03871	0.37931	0.71524	0.52196
map00020 Citrate cycle (TCA cycle)	5.65588e-06	2.11	A0A5G2QPK6	409	K	4.416	0.00806848	Up	Dihydrolipoyl dehydrogenase OS=Sus scrofa OX=9823 GN=DLD PE=1 SV=1	DLD	K00382	1	9.81057e-41	315.21	2	EEGIEYK(1)VGK	0.0090722	1.65767	1.73328	1.50127	0.597975	0.312334	0.197473
map00020 Citrate cycle (TCA cycle)	5.65588e-06	2.11	A0A5G2QPK6	269	K	10.152	0.000750656	Up	Dihydrolipoyl dehydrogenase OS=Sus scrofa OX=9823 GN=DLD PE=1 SV=1	DLD	K00382	1	0.00021351	178.55	2	LNTK(1)VIGATK	-0.50256	1.41263	1.84138	2.20799	0.246217	0.175624	0.11616
map00020 Citrate cycle (TCA cycle)	5.65588e-06	2.11	A0A5G2QPK6	338	K	5.662	0.00569049	Up	Dihydrolipoyl dehydrogenase OS=Sus scrofa OX=9823 GN=DLD PE=1 SV=1	DLD	K00382	1	2.12613e-09	154.65	3	FQTK(1)IPNIYAIGDVVAGPMLAHK	-0.4543	1.04519	1.32725	2.7269	0.242605	0.311758	0.346298
map00020 Citrate cycle (TCA cycle)	5.65588e-06	2.11	A0A5G2QPK6	259	K	4.306	0.00171738	Up	Dihydrolipoyl dehydrogenase OS=Sus scrofa OX=9823 GN=DLD PE=1 SV=1	DLD	K00382	1	0.000942284	135.83	2	ILQK(1)QGFK(1)FK	-0.29711	1.38859	1.8666	1.61407	0.515362	0.282005	0.333363
map00020 Citrate cycle (TCA cycle)	5.65588e-06	2.11	A0A5G2QPK6	151	K	12.703	0.000528701	Up	Dihydrolipoyl dehydrogenase OS=Sus scrofa OX=9823 GN=DLD PE=1 SV=1	DLD	K00382	1	5.05413e-10	201.61	3	ITGK(1)NQVTATK(1)ADGSTEVINTK	0.16389	1.75435	1.80692	2.00089	0.222108	0.0946223	0.121115
map00020 Citrate cycle (TCA cycle)	5.65588e-06	2.11	A0A5G2QPK6	158	K	21.78	0.00019812	Up	Dihydrolipoyl dehydrogenase OS=Sus scrofa OX=9823 GN=DLD PE=1 SV=1	DLD	K00382	1	9.13913e-100	377.19	2	NQVTATK(1)ADGSTEVINTK	-0.156	1.61789	2.19801	1.92072	0.121481	0.0855181	0.0563852
map00020 Citrate cycle (TCA cycle)	5.65588e-06	2.11	A0A5G2QPK6	119	K	12.123	0.00472041	Up	Dihydrolipoyl dehydrogenase OS=Sus scrofa OX=9823 GN=DLD PE=1 SV=1	DLD	K00382	1	9.06167e-05	179.1	2	MMEQK(1)SNAVK	-0.32445	1.39617	0.839096	3.30751	0.181401	0.130613	0.145213
map00020 Citrate cycle (TCA cycle)	5.65588e-06	2.11	A0A5G2QPK6	124	K	11.949	0.0040856	Up	Dihydrolipoyl dehydrogenase OS=Sus scrofa OX=9823 GN=DLD PE=1 SV=1	DLD	K00382	1	1.49524e-09	167.14	3	SNAVK(1)ALTGGIAHLFK(1)QNK	-0.511	2.07125	0.955968	1.70857	0.123067	0.141145
map00020 Citrate cycle (TCA cycle)	5.65588e-06	2.11	A0A5G2QPK6	402	K	2.117	0.0256796	Up	Dihydrolipoyl dehydrogenase OS=Sus scrofa OX=9823 GN=DLD PE=1 SV=1	DLD	K00382	1	6.03025e-06	209.19	2	SEEQLK(1)EEGIEYK	0.28517	1.32037	1.83202	0.922558	0.625911	0.712405	0.586733
map00020 Citrate cycle (TCA cycle)	5.65588e-06	2.11	A0A5G2R718	34	K	6.023	0.0316931	Up	Pyruvate dehydrogenase E1 component subunit beta OS=Sus scrofa OX=9823 GN=PDHB PE=1 SV=1	PDHB	K00162	1	1.04594e-20	167.61	4	DAINQGMDEELERDEK(1)VFLLGEEVAQYDGAYK	-0.31808	1.03207	2.48971	0.97998	0.326682		0.171565
map00020 Citrate cycle (TCA cycle)	5.65588e-06	2.11	A0A5G2R718	50	K	6.433	0.000338382	Up	Pyruvate dehydrogenase E1 component subunit beta OS=Sus scrofa OX=9823 GN=PDHB PE=1 SV=1	PDHB	K00162	1	2.1295e-55	321.67	3	VFLLGEEVAQYDGAYK(1)VSR	-0.11923	1.30726	1.5305	1.69276	0.241922	0.227567
map00020 Citrate cycle (TCA cycle)	5.65588e-06	2.11	A0A5G2R718	336	K	25.703	0.000583753	Up	Pyruvate dehydrogenase E1 component subunit beta OS=Sus scrofa OX=9823 GN=PDHB PE=1 SV=1	PDHB	K00162	1	0.0255332	92.307	3	ILEDNSVPQVK(1)DIIFAIK(1)K	0.31701	1.47854	1.75327	2.5435	0.122807	0.0521125	0.0497732
map00020 Citrate cycle (TCA cycle)	5.65588e-06	2.11	A0A5G2R718	170	K	11.034	0.000616898	Up	Pyruvate dehydrogenase E1 component subunit beta OS=Sus scrofa OX=9823 GN=PDHB PE=1 SV=1	PDHB	K00162	1	0.00690861	120.65	2	GLIK(1)SAIR	-0.50635	1.84458	1.33623	2.32059	0.233349	0.133349	0.131903
map00020 Citrate cycle (TCA cycle)	5.65588e-06	2.11	A0A5G2R718	240	K	6.879	0.0205121	Up	Pyruvate dehydrogenase E1 component subunit beta OS=Sus scrofa OX=9823 GN=PDHB PE=1 SV=1	PDHB	K00162	1	2.61644e-25	205.84	4	PVGHCLEAATVLSK(1)EGIECEVINMR	-0.21928	1.99621	1.82199	0.740027	0.215947		0.22583
map00020 Citrate cycle (TCA cycle)	5.65588e-06	2.11	A0A5G2R718	166	K	14.707	0.00444135	Up	Pyruvate dehydrogenase E1 component subunit beta OS=Sus scrofa OX=9823 GN=PDHB PE=1 SV=1	PDHB	K00162	1	8.42777e-07	162.68	3	VVSPWSSEDAK(1)GLIK	-0.13568	1.72959		2.80764	0.214388	0.151972	0.0964119
map00020 Citrate cycle (TCA cycle)	5.65588e-06	2.11	P00346	185	K	4.208	0.0079468	Up	Malate dehydrogenase, mitochondrial OS=Sus scrofa OX=9823 GN=MDH2 PE=1 SV=2	MDH2	K00026	1	5.48131e-07	235.31	2	ANAFVAELK(1)GLDPAR	-1.0124	1.1204	1.7119	2.0157	0.419117	0.504961	0.227921
map00020 Citrate cycle (TCA cycle)	5.65588e-06	2.11	P00346	329	K	2.438	0.0034956	Up	Malate dehydrogenase, mitochondrial OS=Sus scrofa OX=9823 GN=MDH2 PE=1 SV=2	MDH2	K00026	1	2.53614e-05	156.12	2	K(1)GEEFVK(1)NMK	-0.30892	1.3538	1.67353	1.22748	0.638771	0.647366	0.459058
map00020 Citrate cycle (TCA cycle)	5.65588e-06	2.11	P00346	335	K	21.913	0.00181697	Up	Malate dehydrogenase, mitochondrial OS=Sus scrofa OX=9823 GN=MDH2 PE=1 SV=2	MDH2	K00026	1	8.16366e-28	294.13	2	K(1)GEEFVK(1)NMK	-0.30892	2.1044	1.80614	1.8276	0.170394	0.0405965	0.0508696
map00020 Citrate cycle (TCA cycle)	5.65588e-06	2.11	P00346	78	K	2.603	0.0170854	Up	Malate dehydrogenase, mitochondrial OS=Sus scrofa OX=9823 GN=MDH2 PE=1 SV=2	MDH2	K00026	1	5.50756e-26	273.66	3	ATVK(1)GYLGPEQLPDCLK	-0.80394	1.63839	1.35052	1.34578	0.679153	0.666441	0.319713
map00020 Citrate cycle (TCA cycle)	5.65588e-06	2.11	P00346	279	K	15.425	0.00635621	Up	Malate dehydrogenase, mitochondrial OS=Sus scrofa OX=9823 GN=MDH2 PE=1 SV=2	MDH2	K00026	1	3.3385e-13	159.66	3	EGVVECSFVK(1)SQETDCPYFSTPLLLGK	0.36992	1.30254	1.34379	2.14652	0.149394		0.0577535
map00020 Citrate cycle (TCA cycle)	5.65588e-06	2.11	P00346	301	K	16.907	0.000280571	Up	Malate dehydrogenase, mitochondrial OS=Sus scrofa OX=9823 GN=MDH2 PE=1 SV=2	MDH2	K00026	1	0.000198873	203.02	2	K(1)GIEK(1)NLGIGK	0.40642	1.55129	1.88671	2.22695	0.158934	0.100258	0.0758711
map00020 Citrate cycle (TCA cycle)	5.65588e-06	2.11	P00346	215	K	9.282	0.00463831	Up	Malate dehydrogenase, mitochondrial OS=Sus scrofa OX=9823 GN=MDH2 PE=1 SV=2	MDH2	K00026	1	4.23192e-111	382.37	3	TIIPLISQCTPK(1)VDFPQDQLSTLTGR	0.59884	1.61915	0.976929	2.06888		0.168183	0.166858
map00020 Citrate cycle (TCA cycle)	5.65588e-06	2.11	P00346	45	K	21.045	0.00475866	Up	Malate dehydrogenase, mitochondrial OS=Sus scrofa OX=9823 GN=MDH2 PE=1 SV=2	MDH2	K00026	1	4.41979e-47	292.41	3	VAVLGASGGIGQPLSLLLK(1)NSPLVSR	0.52314	1.71682	0.763961	3.24705	0.143132	0.0813776	0.0476549
map00020 Citrate cycle (TCA cycle)	5.65588e-06	2.11	P00346	203	K	3.403	0.00741222	Up	Malate dehydrogenase, mitochondrial OS=Sus scrofa OX=9823 GN=MDH2 PE=1 SV=2	MDH2	K00026	1	1.30613e-09	153.24	3	VSVPVIGGHAGK(1)TIIPLISQCTPK	-0.18212	1.33607	1.44826	1.39667	0.306724		0.512277
map00020 Citrate cycle (TCA cycle)	5.65588e-06	2.11	I3LCI2	244	K	14.326	7.06486e-05	Up	Pyruvate dehydrogenase E1 component subunit alpha OS=Sus scrofa OX=9823 GN=PDHA1 PE=1 SV=2	PDHA1	K00161	1	0.000402517	172.21	2	AAASTDYYK(1)R	0.24715	2.1465	1.89941	1.56258	0.162102	0.104595	0.124807
map00020 Citrate cycle (TCA cycle)	5.65588e-06	2.11	I3LCI2	83	K	2.468	0.0111998	Up	Pyruvate dehydrogenase E1 component subunit alpha OS=Sus scrofa OX=9823 GN=PDHA1 PE=1 SV=2	PDHA1	K00161	1	2.11455e-13	245.15	3	RMELK(1)ADQLYK(1)QK	-0.75819	1.26937	1.80276	1.19758	0.410631	0.633634	0.686031
map00020 Citrate cycle (TCA cycle)	5.65588e-06	2.11	I3LCI2	85	K	9.005	0.000162366	Up	Pyruvate dehydrogenase E1 component subunit alpha OS=Sus scrofa OX=9823 GN=PDHA1 PE=1 SV=2	PDHA1	K00161	1	0.000436708	138.22	2	ADQLYK(1)QK(1)IIR	-0.94509	1.44813	1.61689	2.33528	0.182028	0.226178	0.19149
map00020 Citrate cycle (TCA cycle)	5.65588e-06	2.11	I3LCI2	149	K	30.357	0.00264492	Up	Pyruvate dehydrogenase E1 component subunit alpha OS=Sus scrofa OX=9823 GN=PDHA1 PE=1 SV=2	PDHA1	K00161	1	0.000497327	166.66	2	GK(1)GGSMHMYAK	-0.26957	1.20887	1.1745	2.50919		0.0416124	0.0658308
map00020 Citrate cycle (TCA cycle)	5.65588e-06	2.11	I3LCI2	77	K	7.793	0.000756203	Up	Pyruvate dehydrogenase E1 component subunit alpha OS=Sus scrofa OX=9823 GN=PDHA1 PE=1 SV=2	PDHA1	K00161	1	2.11455e-13	245.15	3	RMELK(1)ADQLYK(1)QK	-0.75819	1.64932	1.96265	1.70571	0.290556	0.25052	0.141251
map00020 Citrate cycle (TCA cycle)	5.65588e-06	2.11	I3LCI2	321	K	7.822	0.000142572	Up	Pyruvate dehydrogenase E1 component subunit alpha OS=Sus scrofa OX=9823 GN=PDHA1 PE=1 SV=2	PDHA1	K00161	1	7.16903e-05	200.93	2	SK(1)SDPIMLLK(1)DR	-0.73938	1.52532	2.28207	1.51246	0.220389	0.247774	0.211984
map00020 Citrate cycle (TCA cycle)	5.65588e-06	2.11	I3LCI2	277	K	5.209	0.00236988	Up	Pyruvate dehydrogenase E1 component subunit alpha OS=Sus scrofa OX=9823 GN=PDHA1 PE=1 SV=2	PDHA1	K00161	1	2.82417e-14	251.03	2	SGK(1)GPILMELQTYR	2.0211	1.31828	1.80506	1.30939		0.244799	0.322474
map00020 Citrate cycle (TCA cycle)	5.65588e-06	2.11	I3LCI2	313	K	13.059	0.000364323	Up	Pyruvate dehydrogenase E1 component subunit alpha OS=Sus scrofa OX=9823 GN=PDHA1 PE=1 SV=2	PDHA1	K00161	1	4.7682e-05	200.93	2	SK(1)SDPIMLLK(1)DR	-0.73938	1.98833	2.05998	1.5249	0.20686	0.115592	0.104335
map00020 Citrate cycle (TCA cycle)	5.65588e-06	2.11	A0A5S8M9X9	71	K	14.844	0.000627111	Up	Fumarate hydratase, mitochondrial OS=Sus scrofa OX=9823 GN=FH PE=3 SV=1	FH	K01679	1	1.68715e-48	303.36	3	AAAEVNQDYGLDPK(1)IANAIMK(1)AADEVAEGK	1.2008	1.38339	1.65837	1.74333		0.129454	0.0854523
map00020 Citrate cycle (TCA cycle)	5.65588e-06	2.11	A0A5S8M9X9	56	K	5.518	0.0261446	Up	Fumarate hydratase, mitochondrial OS=Sus scrofa OX=9823 GN=FH PE=3 SV=1	FH	K01679	1	0.0109192	137.5	2	AFGILK(1)R	-0.4578	1.06877	1.27778	2.73296	0.595088	0.189005	0.136393
map00020 Citrate cycle (TCA cycle)	5.65588e-06	2.11	A0A5S8M9X9	22	K	4.876	0.00417011	Up	Fumarate hydratase, mitochondrial OS=Sus scrofa OX=9823 GN=FH PE=3 SV=1	FH	K01679	1	2.42228e-06	216.03	2	VPNDK(1)YYGAQTVR	0.52785	1.48856	1.69062	1.79973	0.539996	0.263859	0.217226
map00020 Citrate cycle (TCA cycle)	5.65588e-06	2.11	A0A5S8M9X9	219	K	4.441	0.0117321	Up	Fumarate hydratase, mitochondrial OS=Sus scrofa OX=9823 GN=FH PE=3 SV=1	FH	K01679	1	0.0167131	120.9	2	IK(1)AAMPR	0.27225	1.16263	1.86991	1.86477	0.625706	0.248212	0.22877
map00020 Citrate cycle (TCA cycle)	5.65588e-06	2.11	A0A5S8M9X9	177	K	2.605	0.0147555	Up	Fumarate hydratase, mitochondrial OS=Sus scrofa OX=9823 GN=FH PE=3 SV=1	FH	K01679	1	0.000232823	166.07	2	LHDALDAK(1)SR	-0.50949	1.43174	1.13308	1.77091	0.773685	0.502662	0.387927
map00020 Citrate cycle (TCA cycle)	5.65588e-06	2.11	F1RUV5	261	K	33.147	0.00597187	Up	Pyruvate carboxylase OS=Sus scrofa OX=9823 GN=PC PE=1 SV=4	PC	K01958	1	0.000408943	121.01	3	HGK(1)HYFIEVNSR	0.008484	0.893116	1.20458	2.80373	0.0625295	0.0360506
map00020 Citrate cycle (TCA cycle)	5.65588e-06	2.11	F1S0N2	583	K	3.294	0.0244049	Up	ATP-citrate synthase OS=Sus scrofa OX=9823 GN=ACLY PE=1 SV=3	ACLY	K01648	1	0.000677883	116.01	2	EILIPVFK(1)NMADAMK	-0.50779	1.11378	1.39725	2.09167	0.774168	0.293825	0.329308
map00020 Citrate cycle (TCA cycle)	5.65588e-06	2.11	F1S0N2	272	K	2.689	0.0397425	Up	ATP-citrate synthase OS=Sus scrofa OX=9823 GN=ACLY PE=1 SV=3	ACLY	K01648	1	0.00125457	134.81	2	LTLLNPK(1)GR	-0.21039	1.65104	0.884292	1.47144		0.413896	0.57933
map00020 Citrate cycle (TCA cycle)	5.65588e-06	2.11	F1S0N2	569	K	2.762	0.00634585	Up	ATP-citrate synthase OS=Sus scrofa OX=9823 GN=ACLY PE=1 SV=3	ACLY	K01648	1	0.0264778	47.574	3	QK(1)FYWGHK	-0.55299	1.63555	1.21061	1.18156		0.448414	0.52386
map00020 Citrate cycle (TCA cycle)	5.65588e-06	2.11	P16276	689	K	19.968	0.000624163	Up	Aconitate hydratase, mitochondrial OS=Sus scrofa OX=9823 GN=ACO2 PE=1 SV=1	ACO2	K01681	1	0.000302057	174.27	2	AIITK(1)SFAR	-0.044618	1.49208	1.3721	2.84968	0.136424	0.0724017	0.0773186
map00020 Citrate cycle (TCA cycle)	5.65588e-06	2.11	P16276	31	K	12.669	0.00115542	Up	Aconitate hydratase, mitochondrial OS=Sus scrofa OX=9823 GN=ACO2 PE=1 SV=1	ACO2	K01681	1	3.40818e-81	373.19	3	AK(1)VAMSHFEPHEYIR	-0.18918	1.73332	1.63365	2.19409	0.228138	0.130923	0.0798866
map00020 Citrate cycle (TCA cycle)	5.65588e-06	2.11	P16276	743	K	17.957	0.000782183	Up	Aconitate hydratase, mitochondrial OS=Sus scrofa OX=9823 GN=ACO2 PE=1 SV=1	ACO2	K01681	1	8.52258e-119	382.03	4	CIIK(1)HPNGTQETILLNHTFNETQIEWFR	0.18246	1.55699	2.99231	1.13419	0.0996602	0.0880113	0.128835
map00020 Citrate cycle (TCA cycle)	5.65588e-06	2.11	P16276	411	K	11.448	0.000927523	Up	Aconitate hydratase, mitochondrial OS=Sus scrofa OX=9823 GN=ACO2 PE=1 SV=1	ACO2	K01681	1	7.4393e-41	314.48	2	CK(1)SQFTITPGSEQIR	0.36111	1.25895	1.61425	2.64481	0.21658	0.14122	0.124199
map00020 Citrate cycle (TCA cycle)	5.65588e-06	2.11	P16276	736	K	3.083	0.00559877	Up	Aconitate hydratase, mitochondrial OS=Sus scrofa OX=9823 GN=ACO2 PE=1 SV=1	ACO2	K01681	1	0.0318822	77.282	2	DFAPGK(1)PLK	0.086867	1.27174	1.74756	1.51128	0.639652	0.498386	0.331382
map00020 Citrate cycle (TCA cycle)	5.65588e-06	2.11	P16276	517	K	3.549	0.0132183	Up	Aconitate hydratase, mitochondrial OS=Sus scrofa OX=9823 GN=ACO2 PE=1 SV=1	ACO2	K01681	1	6.62604e-06	186.24	2	FNPETDFLTGK(1)DGK(1)K	0.053389	1.46234	2.18983	1.02885	0.608275	0.406919	0.303786
map00020 Citrate cycle (TCA cycle)	5.65588e-06	2.11	P16276	465	K	14.148	0.00297582	Up	Aconitate hydratase, mitochondrial OS=Sus scrofa OX=9823 GN=ACO2 PE=1 SV=1	ACO2	K01681	1	3.29132e-179	456.4	2	GEK(1)NTIVTSYNR	0.11002	1.5816	1.24132	2.78099	0.224873	0.0693008	0.101917
map00020 Citrate cycle (TCA cycle)	5.65588e-06	2.11	P16276	591	K	4.261	2.81648e-06	Up	Aconitate hydratase, mitochondrial OS=Sus scrofa OX=9823 GN=ACO2 PE=1 SV=1	ACO2	K01681	1	2.14744e-11	229.9	3	GK(1)CTTDHISAAGPWLK	-0.83279	1.43645	1.47365	1.41349	0.338834		0.337578
map00020 Citrate cycle (TCA cycle)	5.65588e-06	2.11	P16276	730	K	10.294	0.000273034	Up	Aconitate hydratase, mitochondrial OS=Sus scrofa OX=9823 GN=ACO2 PE=1 SV=1	ACO2	K01681	1	0.00167357	120.06	2	LTIQGLK(1)DFAPGK	-0.13652	2.04731	2.00427	1.41715	0.225924	0.132675	0.172665
map00020 Citrate cycle (TCA cycle)	5.65588e-06	2.11	P16276	309	K	26.528	0.000192411	Up	Aconitate hydratase, mitochondrial OS=Sus scrofa OX=9823 GN=ACO2 PE=1 SV=1	ACO2	K01681	1	0.0158508	130.28	2	YLSK(1)TGR	0.31834	1.83217	1.69531	2.25456	0.106581	0.0643071	0.0470683
map00020 Citrate cycle (TCA cycle)	5.65588e-06	2.11	P16276	573	K	12.775	0.0276893	Up	Aconitate hydratase, mitochondrial OS=Sus scrofa OX=9823 GN=ACO2 PE=1 SV=1	ACO2	K01681	1	3.58621e-09	169.58	2	LQLLEPFDK(1)WDGK	0.30085	1.17862	2.12908	1.44433	0.213796		0.0341821
map00020 Citrate cycle (TCA cycle)	5.65588e-06	2.11	P16276	577	K	24.087	0.00482662	Up	Aconitate hydratase, mitochondrial OS=Sus scrofa OX=9823 GN=ACO2 PE=1 SV=1	ACO2	K01681	1	6.5465e-14	240.6	2	WDGK(1)DLEDLQILIK	0.42675	1.76202	2.27418	0.829138		0.0791286	0.0555321
map00020 Citrate cycle (TCA cycle)	5.65588e-06	2.11	P16276	776	K	6.021	0.0026225	Up	Aconitate hydratase, mitochondrial OS=Sus scrofa OX=9823 GN=ACO2 PE=1 SV=1	ACO2	K01681	1	0.0162358	121.62	2	MK(1)ELQQK	-0.42385	1.81735	1.68668	1.64139	0.437479	0.167133	0.249968
map00020 Citrate cycle (TCA cycle)	5.65588e-06	2.11	P16276	401	K	7.441	0.0270806	Up	Aconitate hydratase, mitochondrial OS=Sus scrofa OX=9823 GN=ACO2 PE=1 SV=1	ACO2	K01681	1	4.17135e-06	152.62	2	SAAVAK(1)QALAHGLK	-0.23276	2.39631	1.76483		0.41383	0.313212	0.111817
map00020 Citrate cycle (TCA cycle)	5.65588e-06	2.11	P16276	138	K	2.442	0.0116481	Up	Aconitate hydratase, mitochondrial OS=Sus scrofa OX=9823 GN=ACO2 PE=1 SV=1	ACO2	K01681	1	2.8047e-13	174.19	3	VAVPSTIHCDHLIEAQLGGEK(1)DLR	0.45548	1.20147	1.46344	1.59185	0.821558	0.457865	0.463829
map00020 Citrate cycle (TCA cycle)	5.65588e-06	2.11	P16276	50	K	12.102	4.26321e-05	Up	Aconitate hydratase, mitochondrial OS=Sus scrofa OX=9823 GN=ACO2 PE=1 SV=1	ACO2	K01681	1	3.29924e-06	218.07	2	YDLLEK(1)NIDIVR	0.14097	1.47189	1.78743	2.28273	0.153344	0.157477	0.147131
map00020 Citrate cycle (TCA cycle)	5.65588e-06	2.11	P16276	549	K	5.59	0.0293716	Up	Aconitate hydratase, mitochondrial OS=Sus scrofa OX=9823 GN=ACO2 PE=1 SV=1	ACO2	K01681	1	1.60159e-48	304.03	3	AEFDPGQDTYQHPPK(1)DSSGQR	0.69224		2.46666	1.47553	0.598898	0.215406	0.243499
map00020 Citrate cycle (TCA cycle)	5.65588e-06	2.11	F1SRC5	627	K	3.221	0.00638557	Up	Aconitate hydratase, mitochondrial OS=Sus scrofa OX=9823 GN=ACO2 PE=1 SV=3	ACO2	K01681	1	2.06239e-28	223.18	3	GHLDNISNNLLIGAINIENGK(1)ANSVR	-0.37308	1.42903	1.47318	1.67642	0.585671	0.548254	0.287443
map00020 Citrate cycle (TCA cycle)	5.65588e-06	2.11	I3LDC1	123	K	8.365	0.00179527	Up	Succinate dehydrogenase [ubiquinone] iron-sulfur subunit, mitochondrial OS=Sus scrofa OX=9823 GN=SDHB PE=1 SV=1	SDHB	K00235	1	0.00031718	171.67	3	RIDTNLNK(1)VSK	0.085047	1.53883	1.38515	2.43532	0.321014	0.167145	0.152548
map00020 Citrate cycle (TCA cycle)	5.65588e-06	2.11	I3LDC1	80	K	7.93	0.00197892	Up	Succinate dehydrogenase [ubiquinone] iron-sulfur subunit, mitochondrial OS=Sus scrofa OX=9823 GN=SDHB PE=1 SV=1	SDHB	K00235	1	2.26785e-08	221.59	3	IK(1)NEIDSTLTFR	-0.36253	1.6269	1.37465	2.32652	0.33147	0.19973	0.140729
map00020 Citrate cycle (TCA cycle)	5.65588e-06	2.11	Q1G1K7	374	K	5.08	0.0257448	Up	Isocitrate dehydrogenase [NAD] subunit, mitochondrial OS=Sus scrofa OX=9823 GN=IDH3B PE=1 SV=1	IDH3B	K00030	1	6.30672e-08	138.04	3	DMGGYSTTTDFIK(1)SVIGHLHPHGG	0.056943		1.65213	2.20807	0.539515	0.192415	0.407872
map00020 Citrate cycle (TCA cycle)	5.65588e-06	2.11	Q1G1K7	108	K	15.575	0.000239749	Up	Isocitrate dehydrogenase [NAD] subunit, mitochondrial OS=Sus scrofa OX=9823 GN=IDH3B PE=1 SV=1	IDH3B	K00030	1	0.0130342	96.624	2	ENK(1)VAIIGK	0.55016	1.88725	1.43667	2.3141	0.15826	0.116872	0.0868536
map00020 Citrate cycle (TCA cycle)	5.65588e-06	2.11	Q1G1K7	114	K	6.203	0.0236274	Up	Isocitrate dehydrogenase [NAD] subunit, mitochondrial OS=Sus scrofa OX=9823 GN=IDH3B PE=1 SV=1	IDH3B	K00030	1	1.29215e-06	213.63	2	VAIIGK(1)IHTPMEYK	0.37624	1.54776	2.47863		0.531258	0.262341	0.180017
map00020 Citrate cycle (TCA cycle)	5.65588e-06	2.11	Q1G1K7	72	K	9.436	0.0206051	Up	Isocitrate dehydrogenase [NAD] subunit, mitochondrial OS=Sus scrofa OX=9823 GN=IDH3B PE=1 SV=1	IDH3B	K00030	1	7.77965e-37	231.68	4	EVFK(1)AASVPVEFQEHHLSEVQNMASEEK	-0.47386	1.04073	3.27348		0.165089	0.263256	0.257452
map00020 Citrate cycle (TCA cycle)	5.65588e-06	2.11	Q1G1K7	207	K	19.877	0.0014135	Up	Isocitrate dehydrogenase [NAD] subunit, mitochondrial OS=Sus scrofa OX=9823 GN=IDH3B PE=1 SV=1	IDH3B	K00030	1	0.00129744	129.72	2	FAFDYATK(1)K	1.1103	1.04708	1.82509	1.96557		0.0825993	0.0796592
map00020 Citrate cycle (TCA cycle)	5.65588e-06	2.11	Q1G1K7	122	K	10.96	0.000254727	Up	Isocitrate dehydrogenase [NAD] subunit, mitochondrial OS=Sus scrofa OX=9823 GN=IDH3B PE=1 SV=1	IDH3B	K00030	1	3.20445e-35	296.97	3	IHTPMEYK(1)GELASYDMR	0.57264	1.54156	2.08513	1.87164	0.224685	0.154349	0.122635
map00020 Citrate cycle (TCA cycle)	5.65588e-06	2.11	Q1G1K7	146	K	5.844	0.00710459	Up	Isocitrate dehydrogenase [NAD] subunit, mitochondrial OS=Sus scrofa OX=9823 GN=IDH3B PE=1 SV=1	IDH3B	K00030	1	4.58481e-26	263.99	2	LDLFANVVHVK(1)SLPGYMTR	0.44288	0.959775	1.75864	1.76958	0.25823		0.253774
map00062 Fatty acid elongation	0.0164588	2.08	A0A286ZVQ0	42	K	3.93	0.000258842	Up	Acyl-coenzyme A thioesterase 2, mitochondrial(predicted) OS=Sus scrofa OX=9823 GN=ACOT4 PE=1 SV=2	ACOT4	K01068	1	0.0040599	132.29	2	DEK(1)GALFR	0.73605	1.49139	1.92941	1.36218	0.416795	0.425315	0.374918
map00062 Fatty acid elongation	0.0164588	2.08	A0A286ZVQ0	348	K	9.941	0.000305548	Up	Acyl-coenzyme A thioesterase 2, mitochondrial(predicted) OS=Sus scrofa OX=9823 GN=ACOT4 PE=1 SV=2	ACOT4	K01068	1	0.00776261	100.02	2	EK(1)PQIICYPR	-1.2976	1.40495	1.8454	2.20123	0.239424	0.159295	0.149697
map00062 Fatty acid elongation	0.0164588	2.08	A0A287B8N7	138	K	12.087	0.000681826	Up	Acyl-CoA thioesterase 7 OS=Sus scrofa OX=9823 GN=ACOT7 PE=1 SV=2	ACOT7	K17360	1	1.08506e-06	159.99	2	ATLWYVPLSLK(1)NVDK	0.40755	1.6468	1.90851	1.98622	0.19133	0.0851251	0.182012
map00062 Fatty acid elongation	0.0164588	2.08	A0A287B8N7	142	K	4.909	0.00301406	Up	Acyl-CoA thioesterase 7 OS=Sus scrofa OX=9823 GN=ACOT7 PE=1 SV=2	ACOT7	K17360	1	1.03848e-06	169.6	2	NVDK(1)VLEVPPVVYSR	-0.67204	1.4933	1.28005	1.62885	0.360815	0.236984
map00062 Fatty acid elongation	0.0164588	2.08	A0A287B8N7	237	K	7.21	0.000839889	Up	Acyl-CoA thioesterase 7 OS=Sus scrofa OX=9823 GN=ACOT7 PE=1 SV=2	ACOT7	K17360	1	1.22686e-11	182.47	4	HCK(1)TNIVTASVDAINFHDK	-0.0068124	1.72327	1.28882	2.25705	0.30988	0.186203	0.234777
map00062 Fatty acid elongation	0.0164588	2.08	A0A287B8N7	127	K	6.338	0.0350036	Up	Acyl-CoA thioesterase 7 OS=Sus scrofa OX=9823 GN=ACOT7 PE=1 SV=2	ACOT7	K17360	1	1.32388e-06	157.33	2	LTNK(1)ATLWYVPLSLK	-0.34207	1.26264	1.20886	2.05266	0.379095		0.0967494
map00062 Fatty acid elongation	0.0164588	2.08	A0A287AA21	139	K	20.278	0.000317685	Up	Enoyl-CoA hydratase, mitochondrial OS=Sus scrofa OX=9823 GN=ECHS1 PE=1 SV=2	ECHS1	K07511	1	2.67594e-146	404.47	4	AFAAGADIK(1)EMQNQTFQDCYSGGFLSHWDHLSR	0.4262	2.63466		2.02096	0.096066	0.133847	0.11447
map00062 Fatty acid elongation	0.0164588	2.08	A0A287AA21	320	K	6.846	0.0125963	Up	Enoyl-CoA hydratase, mitochondrial OS=Sus scrofa OX=9823 GN=ECHS1 PE=1 SV=2	ECHS1	K07511	1	0.00959304	88.364	2	EGMTAFVEK(1)R	0.70354	1.44063	1.29248	1.82318	0.319528	0.124176
map00062 Fatty acid elongation	0.0164588	2.08	A0A287AA21	81	K	34.123	0.00143034	Up	Enoyl-CoA hydratase, mitochondrial OS=Sus scrofa OX=9823 GN=ECHS1 PE=1 SV=2	ECHS1	K07511	1	5.79872e-96	376.25	2	GK(1)SSNVGLIQLNRPK	0.042881	1.85701	1.5273	2.44486	0.109275	0.0233578	0.0381957
map00062 Fatty acid elongation	0.0164588	2.08	A0A287AA21	94	K	3.783	0.0112545	Up	Enoyl-CoA hydratase, mitochondrial OS=Sus scrofa OX=9823 GN=ECHS1 PE=1 SV=2	ECHS1	K07511	1	0.000289903	179.21	2	PK(1)ALNALCK	-1.0226	1.47849	1.44979	1.81725	0.702539	0.28967	0.262259
map00062 Fatty acid elongation	0.0164588	2.08	A0A5G2R0S9	249	K	6.147	0.0277451	Up	PKS_ER domain-containing protein OS=Sus scrofa OX=9823 GN=SRSF4 PE=1 SV=1	SRSF4	K07512	1	0.000542593	129.38	3	KPEMK(1)NFFK	-0.43279	1.42517	1.56948	2.16585	0.648999	0.0787896	0.111713
map00062 Fatty acid elongation	0.0164588	2.08	A0A5G2R0S9	253	K	10.781	0.0247228	Up	PKS_ER domain-containing protein OS=Sus scrofa OX=9823 GN=SRSF4 PE=1 SV=1	SRSF4	K07512	1	0.000390811	180.93	2	NFFK(1)NVPQPR	-0.12384	1.52105	1.24392	1.94386	0.244145		0.0470272
map00062 Fatty acid elongation	0.0164588	2.08	A0A5G2R0S9	268	K	6.966	0.0176601	Up	PKS_ER domain-containing protein OS=Sus scrofa OX=9823 GN=SRSF4 PE=1 SV=1	SRSF4	K07512	1	1.18691e-15	245.69	2	LALNCVGGK(1)SSTELLR	-0.27973	1.60888	1.55883	2.07908	0.559029	0.0987397	0.0954382
map00062 Fatty acid elongation	0.0164588	2.08	A0A5G2R0S9	230	K	9.871	0.00331187	Up	PKS_ER domain-containing protein OS=Sus scrofa OX=9823 GN=SRSF4 PE=1 SV=1	SRSF4	K07512	1	3.35911e-115	393.16	2	LK(1)NLGADHVVTEEELR	0.28506	1.80664	1.64821	1.99323	0.339013	0.11025	0.10266
map00062 Fatty acid elongation	0.0164588	2.08	A0A5G2R0S9	62	K	7.185	0.0113165	Up	PKS_ER domain-containing protein OS=Sus scrofa OX=9823 GN=SRSF4 PE=1 SV=1	SRSF4	K07512	1	1.19377e-07	145.9	3	VVELK(1)NLELAAVGGSDVHVK	-0.14489	1.85068	1.63983	1.77642	0.46154	0.188422	0.0831015
map00062 Fatty acid elongation	0.0164588	2.08	A0A5G2QGJ8	155	K	11.093	0.000688087	Up	Trifunctional enzyme subunit beta, mitochondrial isoform X1(predicted) OS=Sus scrofa OX=9823 GN=HADHB PE=1 SV=1	HADHB	K07509	1	0.0124735	149.4	2	AK(1)TLGQR	1.4788	1.80152	1.63004	2.07228	0.202804	0.0949351	0.198428
map00062 Fatty acid elongation	0.0164588	2.08	A0A5G2QGJ8	299	K	9.076	0.000467515	Up	Trifunctional enzyme subunit beta, mitochondrial isoform X1(predicted) OS=Sus scrofa OX=9823 GN=HADHB PE=1 SV=1	HADHB	K07509	0.999806	4.038e-05	203.29	2	ALAMGYKPK(1)AYLR	1.5182	1.55471	1.53914	2.31069	0.148835	0.260978	0.185648
map00062 Fatty acid elongation	0.0164588	2.08	A0A5G2QGJ8	313	K	16.541	0.0020665	Up	Trifunctional enzyme subunit beta, mitochondrial isoform X1(predicted) OS=Sus scrofa OX=9823 GN=HADHB PE=1 SV=1	HADHB	K07509	1	5.64523e-62	328.59	2	DFTYVSQDPK(1)DQLLLGPTYATPK	-0.033675	1.95993		2.62435	0.190741	0.0954038	0.129585
map00062 Fatty acid elongation	0.0164588	2.08	A0A5G2QGJ8	37	K	2.493	0.0409444	Up	Trifunctional enzyme subunit beta, mitochondrial isoform X1(predicted) OS=Sus scrofa OX=9823 GN=HADHB PE=1 SV=1	HADHB	K07509	1	5.60985e-12	178.32	3	IPFLQSGTSYK(1)ELMPHDLAR	0.22899	1.58385	1.79603	0.902182	0.354256	0.755048	0.608635
map00062 Fatty acid elongation	0.0164588	2.08	A0A5G2QGJ8	146	K	35.146	1.50274e-05	Up	Trifunctional enzyme subunit beta, mitochondrial isoform X1(predicted) OS=Sus scrofa OX=9823 GN=HADHB PE=1 SV=1	HADHB	K07509	1	0.00492857	121.67	2	K(1)MMLDLNK(1)AK	-2.1626	2.03128	1.82247	1.98026	0.0417937	0.0571277	0.0670698
map00062 Fatty acid elongation	0.0164588	2.08	A0A5G2QGJ8	153	K	7.72	0.000687803	Up	Trifunctional enzyme subunit beta, mitochondrial isoform X1(predicted) OS=Sus scrofa OX=9823 GN=HADHB PE=1 SV=1	HADHB	K07509	1	0.00964011	112.3	2	MMLDLNK(1)AK	-0.042649	1.92004	1.60233	1.78957	0.321396	0.212996	0.153668
map00062 Fatty acid elongation	0.0164588	2.08	A0A5G2QGJ8	258	K	7.07	0.00151715	Up	Trifunctional enzyme subunit beta, mitochondrial isoform X1(predicted) OS=Sus scrofa OX=9823 GN=HADHB PE=1 SV=1	HADHB	K07509	1	4.45503e-17	160.9	4	LK(1)PAFIK(1)PYGTVTAANSSFLTDGASAVLIMAEEK	0.54482	1.31942	1.82457	2.1125	0.35524	0.170018	0.21825
map00062 Fatty acid elongation	0.0164588	2.08	A0A5G2QGJ8	166	K	5.194	0.000819137	Up	Trifunctional enzyme subunit beta, mitochondrial isoform X1(predicted) OS=Sus scrofa OX=9823 GN=HADHB PE=1 SV=1	HADHB	K07509	1	0.00107516	163.67	2	LSLISK(1)FR	-0.087021	1.51955	1.66216	1.24948	0.302611	0.266197
map00062 Fatty acid elongation	0.0164588	2.08	A0A5G2QGJ8	60	K	5.314	0.00903139	Up	Trifunctional enzyme subunit beta, mitochondrial isoform X1(predicted) OS=Sus scrofa OX=9823 GN=HADHB PE=1 SV=1	HADHB	K07509	1	7.61819e-06	126.91	3	TSVPK(1)DVVDYLVFGTVIQEVK	0.1673	1.20824	2.07548	1.1589		0.32443	0.232946
map00062 Fatty acid elongation	0.0164588	2.08	A0A5G2QGJ8	237	K	3.345	0.00573509	Up	Trifunctional enzyme subunit beta, mitochondrial isoform X1(predicted) OS=Sus scrofa OX=9823 GN=HADHB PE=1 SV=1	HADHB	K07509	1	1.55853e-32	248.18	3	VPGK(1)DTVTQDNGIRPSSLEQMAK(1)LK	-1.2425	1.49428	1.80172	1.32318	0.627408	0.452539	0.300879
map00062 Fatty acid elongation	0.0164588	2.08	A0A5S6HDE4	231	K	2.576	0.00250875	Up	Hydroxyacyl-coenzyme A dehydrogenase, mitochondrial OS=Sus scrofa OX=9823 GN=HADH PE=1 SV=1	HADH	K00022	1	6.94408e-05	150.09	2	GDASK(1)EDIDTAMK	0.26145	1.5284	1.65931	1.1345	0.633765	0.559479	0.484542
map00062 Fatty acid elongation	0.0164588	2.08	A0A5S6HDE4	202	K	18.551	0.000642125	Up	Hydroxyacyl-coenzyme A dehydrogenase, mitochondrial OS=Sus scrofa OX=9823 GN=HADH PE=1 SV=1	HADH	K00022	1	2.6101e-135	417.7	3	HPVSCK(1)DTPGFIVNR	0.22751	2.15088	1.56223	1.97999	0.167468	0.0746803	0.0647446
map00062 Fatty acid elongation	0.0164588	2.08	A0A5S6HDE4	68	K	2.566	0.0197806	Up	Hydroxyacyl-coenzyme A dehydrogenase, mitochondrial OS=Sus scrofa OX=9823 GN=HADH PE=1 SV=1	HADH	K00022	1	0.00335906	129.56	2	K(1)GIEESLR	-0.2846	1.35863	1.55845	1.05167		0.614864	0.41638
map00062 Fatty acid elongation	0.0164588	2.08	A0A5S6HDE4	192	K	6.499	0.000761788	Up	Hydroxyacyl-coenzyme A dehydrogenase, mitochondrial OS=Sus scrofa OX=9823 GN=HADH PE=1 SV=1	HADH	K00022	1	3.51536e-06	201.6	2	TLESLVDFSK(1)TLGK	-0.3572	1.72206	1.91896	1.55885	0.375695	0.194467	0.229971
map00062 Fatty acid elongation	0.0164588	2.08	F6PZX4	137	K	16.801	3.14326e-06	Up	Acetyl-CoA acyltransferase 2 OS=Sus scrofa OX=9823 GN=ACAA2 PE=1 SV=2	ACAA2	K07508	1	0.00067048	167.93	2	FGTK(1)LGLDLK	1.2504	1.76597	2.08118	1.8158	0.103507	0.108565	0.124983
map00062 Fatty acid elongation	0.0164588	2.08	F6PZX4	13	K	16.291	0.000218767	Up	Acetyl-CoA acyltransferase 2 OS=Sus scrofa OX=9823 GN=ACAA2 PE=1 SV=2	ACAA2	K07508	1	0.000343022	146.94	2	GVFIVAAK(1)R	-0.47461	1.94982	1.746	1.95718	0.162848	0.076179	0.107977
map00062 Fatty acid elongation	0.0164588	2.08	F6PZX4	270	K	21.734	1.75916e-05	Up	Acetyl-CoA acyltransferase 2 OS=Sus scrofa OX=9823 GN=ACAA2 PE=1 SV=2	ACAA2	K07508	1	0.000233206	175.44	3	K(1)HNFTPLAR	-0.70551	1.70119	1.88685	2.14804	0.108045	0.0778522	0.0780238
map00062 Fatty acid elongation	0.0164588	2.08	F6PZX4	234	K	6.409	0.00577129	Up	Acetyl-CoA acyltransferase 2 OS=Sus scrofa OX=9823 GN=ACAA2 PE=1 SV=2	ACAA2	K07508	1	2.84299e-22	262.64	3	PQTTLEQLSK(1)LPPVFK	-0.32349	2.02225	2.02944		0.453748	0.228696	0.26587
map00062 Fatty acid elongation	0.0164588	2.08	Q29554	262	K	7.157	0.000148423	Up	Trifunctional enzyme subunit alpha, mitochondrial OS=Sus scrofa OX=9823 GN=HADHA PE=2 SV=1	HADHA	K07515	1	0.0230026	111.39	2	DK(1)GLVEK	1.9227	1.50796	2.12247	1.63404	0.279951	0.203239	0.252339
map00062 Fatty acid elongation	0.0164588	2.08	Q29554	337	K	5.135	0.00990179	Up	Trifunctional enzyme subunit alpha, mitochondrial OS=Sus scrofa OX=9823 GN=HADHA PE=2 SV=1	HADHA	K07515	1	0.000273283	140.14	2	ESK(1)ALMGLYR	0.70982	1.50834	1.78929	1.72442	0.593777	0.169854	0.214311
map00062 Fatty acid elongation	0.0164588	2.08	Q29554	362	K	12.399	0.00224888	Up	Trifunctional enzyme subunit alpha, mitochondrial OS=Sus scrofa OX=9823 GN=HADHA PE=2 SV=1	HADHA	K07515	1	9.1233e-14	179.64	3	EVK(1)HLAILGAGLMGAGIAQVSVDK	-0.67277	1.6314	1.74674	2.17407	0.222383	0.160488	0.064918
map00062 Fatty acid elongation	0.0164588	2.08	Q29554	383	K	19.394	9.94043e-06	Up	Trifunctional enzyme subunit alpha, mitochondrial OS=Sus scrofa OX=9823 GN=HADHA PE=2 SV=1	HADHA	K07515	1	3.28254e-38	274.47	4	HLAILGAGLMGAGIAQVSVDK(1)HLK	-0.1212	2.12967	1.89821	1.67791	0.090733	0.114597	0.0888792
map00062 Fatty acid elongation	0.0164588	2.08	Q29554	644	K	15.327	0.0011441	Up	Trifunctional enzyme subunit alpha, mitochondrial OS=Sus scrofa OX=9823 GN=HADHA PE=2 SV=1	HADHA	K07515	1	8.86086e-20	266.58	2	GFYVYQEGVK(1)NR	0.60213	1.48671	2.30343	1.84236	0.198756	0.100973	0.067768
map00062 Fatty acid elongation	0.0164588	2.08	Q29554	411	K	11.934	0.000413425	Up	Trifunctional enzyme subunit alpha, mitochondrial OS=Sus scrofa OX=9823 GN=HADHA PE=2 SV=1	HADHA	K07515	1	1.50313e-28	286.45	3	GQQQVFK(1)GLNDK(1)VR	1.615	1.57651	2.0978	1.86178	0.219664	0.140402	0.103844
map00062 Fatty acid elongation	0.0164588	2.08	Q29554	309	K	9.663	0.00122596	Up	Trifunctional enzyme subunit alpha, mitochondrial OS=Sus scrofa OX=9823 GN=HADHA PE=2 SV=1	HADHA	K07515	1	5.4447e-28	256.9	3	IIDVVK(1)TGIEQGSDAGYLSESQK	-0.48788	1.59465	1.25306	2.5896	0.237413	0.19424	0.131039
map00062 Fatty acid elongation	0.0164588	2.08	Q29554	406	K	5.333	0.000909967	Up	Trifunctional enzyme subunit alpha, mitochondrial OS=Sus scrofa OX=9823 GN=HADHA PE=2 SV=1	HADHA	K07515	1	1.50313e-28	286.45	3	GQQQVFK(1)GLNDK(1)VR	1.615	1.48731	1.95748	1.60773	0.404543	0.222485	0.320456
map00062 Fatty acid elongation	0.0164588	2.08	Q29554	350	K	14.935	0.00147652	Up	Trifunctional enzyme subunit alpha, mitochondrial OS=Sus scrofa OX=9823 GN=HADHA PE=2 SV=1	HADHA	K07515	1	0.00182356	143.91	2	GQTLCK(1)K(1)NK	-0.2853	1.30268	1.99373	2.32706	0.21086	0.0863472	0.0793269
map00062 Fatty acid elongation	0.0164588	2.08	Q29554	351	K	14.935	0.00147652	Up	Trifunctional enzyme subunit alpha, mitochondrial OS=Sus scrofa OX=9823 GN=HADHA PE=2 SV=1	HADHA	K07515	1	0.00182356	143.91	2	GQTLCK(1)K(1)NK	-0.2853	1.30268	1.99373	2.32706	0.21086	0.0863472	0.0793269
map00062 Fatty acid elongation	0.0164588	2.08	Q29554	386	K	12.376	0.0015873	Up	Trifunctional enzyme subunit alpha, mitochondrial OS=Sus scrofa OX=9823 GN=HADHA PE=2 SV=1	HADHA	K07515	1	0.0143054	129.47	2	HLK(1)TILK	-0.23222	1.92691	1.70284	1.92167	0.239517	0.0732694	0.135795
map00062 Fatty acid elongation	0.0164588	2.08	Q29554	569	K	6.484	0.000221604	Up	Trifunctional enzyme subunit alpha, mitochondrial OS=Sus scrofa OX=9823 GN=HADHA PE=2 SV=1	HADHA	K07515	1	6.69682e-05	145.17	2	ILQEGVGPK(1)K	-0.45387	1.48643	2.22279	1.4891	0.264961	0.295403	0.241316
map00062 Fatty acid elongation	0.0164588	2.08	Q29554	415	K	5.846	0.000430241	Up	Trifunctional enzyme subunit alpha, mitochondrial OS=Sus scrofa OX=9823 GN=HADHA PE=2 SV=1	HADHA	K07515	1	0.0156839	109.71	2	K(1)K(1)ALTSFER	0.00556	1.54473	1.83478	1.74407	0.387967	0.259421	0.22904
map00062 Fatty acid elongation	0.0164588	2.08	Q29554	414	K	6.775	0.000281527	Up	Trifunctional enzyme subunit alpha, mitochondrial OS=Sus scrofa OX=9823 GN=HADHA PE=2 SV=1	HADHA	K07515	1	0.0196487	109.71	2	K(1)K(1)ALTSFER	0.00556	1.58979	1.87795	1.76058	0.3357	0.237865	0.198115
map00062 Fatty acid elongation	0.0164588	2.08	Q29554	597	K	49.862	0.000225682	Up	Trifunctional enzyme subunit alpha, mitochondrial OS=Sus scrofa OX=9823 GN=HADHA PE=2 SV=1	HADHA	K07515	1	1.99798e-98	345.79	4	LDSLTTSFGFPVGAATLMDEVGMDVAK(1)HVAENLGK	0.19193	1.33536	2.20761	2.33906	0.0270586	0.0610966	0.0298099
map00062 Fatty acid elongation	0.0164588	2.08	Q29554	214	K	8.368	0.0165153	Up	Trifunctional enzyme subunit alpha, mitochondrial OS=Sus scrofa OX=9823 GN=HADHA PE=2 SV=1	HADHA	K07515	1	0.000150662	100.08	3	K(1)MGLVDQLVEPLGPGLKPPEER	-0.76534	1.29578	2.1035	1.23176		0.275297	0.0936636
map00062 Fatty acid elongation	0.0164588	2.08	Q29554	292	K	7.381	9.84506e-05	Up	Trifunctional enzyme subunit alpha, mitochondrial OS=Sus scrofa OX=9823 GN=HADHA PE=2 SV=1	HADHA	K07515	1	1.84032e-12	234.92	2	K(1)QTK(1)GLYPAPLK	-0.034596	1.4069	1.90507	1.97215	0.272319	0.225776	0.217793
map00062 Fatty acid elongation	0.0164588	2.08	Q29554	295	K	7.591	0.00013527	Up	Trifunctional enzyme subunit alpha, mitochondrial OS=Sus scrofa OX=9823 GN=HADHA PE=2 SV=1	HADHA	K07515	1	1.84032e-12	234.92	2	QTK(1)GLYPAPLK(1)IIDVVK	0.38096	1.32944	2.05122	1.92096	0.245202	0.217096	0.236093
map00062 Fatty acid elongation	0.0164588	2.08	Q29554	634	K	6.425	0.011437	Up	Trifunctional enzyme subunit alpha, mitochondrial OS=Sus scrofa OX=9823 GN=HADHA PE=2 SV=1	HADHA	K07515	1	5.26918e-05	156.01	2	SGK(1)GFYVYQEGVK	0.6105	1.04396	1.88455	2.26345	0.490762	0.16206	0.155214
map00062 Fatty acid elongation	0.0164588	2.08	Q29554	285	K	23.805	0.00153919	Up	Trifunctional enzyme subunit alpha, mitochondrial OS=Sus scrofa OX=9823 GN=HADHA PE=2 SV=1	HADHA	K07515	1	0.00173611	188.81	2	K(1)VEEK(1)VR	-1.2912	1.59953	1.42516	1.83909	0.0920056	0.044207
map00062 Fatty acid elongation	0.0164588	2.08	Q29554	289	K	23.805	0.00153919	Up	Trifunctional enzyme subunit alpha, mitochondrial OS=Sus scrofa OX=9823 GN=HADHA PE=2 SV=1	HADHA	K07515	1	0.00173611	188.81	2	K(1)VEEK(1)VR	-1.2912	1.59953	1.42516	1.83909	0.0920056	0.044207
map00062 Fatty acid elongation	0.0164588	2.08	Q29554	735	K	3.491	0.0118892	Up	Trifunctional enzyme subunit alpha, mitochondrial OS=Sus scrofa OX=9823 GN=HADHA PE=2 SV=1	HADHA	K07515	1	0.0119138	104.06	2	K(1)YEAIYGK	0.26186	1.23405	2.03733	1.39269	0.638898	0.430363	0.266668
map00062 Fatty acid elongation	0.0164588	2.08	Q29554	742	K	7.604	0.0174953	Up	Trifunctional enzyme subunit alpha, mitochondrial OS=Sus scrofa OX=9823 GN=HADHA PE=2 SV=1	HADHA	K07515	1	3.33074e-56	310.9	3	YEAIYGK(1)QFTPCQLLIDHASSPNK	-0.40933	2.1914	0.973562	2.13768	0.472701	0.137778	0.0868798
map00062 Fatty acid elongation	0.0164588	2.08	Q29554	534	K	4.968	0.000506262	Up	Trifunctional enzyme subunit alpha, mitochondrial OS=Sus scrofa OX=9823 GN=HADHA PE=2 SV=1	HADHA	K07515	1	0.00874134	105.14	2	QGK(1)VIIVVK	0.043046	1.36823	1.52781	2.09859	0.391651	0.323143	0.290575
map00062 Fatty acid elongation	0.0164588	2.08	Q29554	540	K	14.449	0.000158613	Up	Trifunctional enzyme subunit alpha, mitochondrial OS=Sus scrofa OX=9823 GN=HADHA PE=2 SV=1	HADHA	K07515	1	7.99001e-16	250.94	2	VIIVVK(1)DGPGFYTTR	-0.12074	1.60044	2.05039	1.96079	0.178844	0.100987	0.108549
map00062 Fatty acid elongation	0.0164588	2.08	Q29554	625	K	7.608	0.00111284	Up	Trifunctional enzyme subunit alpha, mitochondrial OS=Sus scrofa OX=9823 GN=HADHA PE=2 SV=1	HADHA	K07515	1	0.0025854	118.5	2	QMISK(1)GFLGR	-0.27704	1.1603	1.70591	2.43674	0.275322	0.229837	0.191894
map00062 Fatty acid elongation	0.0164588	2.08	Q29554	505	K	6.295	0.000205172	Up	Trifunctional enzyme subunit alpha, mitochondrial OS=Sus scrofa OX=9823 GN=HADHA PE=2 SV=1	HADHA	K07515	1	1.51822e-08	153.88	3	VIGMHYFSPVDK(1)MQLLEIITTEK(1)TSK	-0.39814	1.33542	1.74453	2.09761	0.265787	0.302348	0.254302
map00062 Fatty acid elongation	0.0164588	2.08	Q29554	46	K	8.052	0.000393129	Up	Trifunctional enzyme subunit alpha, mitochondrial OS=Sus scrofa OX=9823 GN=HADHA PE=2 SV=1	HADHA	K07515	1	3.54276e-40	307.15	3	THINYGVK(1)GDVAVIR	-0.22291	1.61211	1.97531	1.74975	0.298486	0.205942	0.158402
map00062 Fatty acid elongation	0.0164588	2.08	Q29554	249	K	26.732	0.000913743	Up	Trifunctional enzyme subunit alpha, mitochondrial OS=Sus scrofa OX=9823 GN=HADHA PE=2 SV=1	HADHA	K07515	1	1.15063e-11	195.1	2	TIEYLEEVAVTFAK(1)GLADK	0.45096	1.91777	1.70262	1.25795	0.0458436		0.0758183
map00071 Fatty acid degradation	0.000101424	2.1	A0A287ADK3	409	K	17.969	0.0215392	Up	Aldehyde dehydrogenase (NAD(+)) OS=Sus scrofa OX=9823 GN=ALDH7A1 PE=1 SV=1	ALDH7A1	K14085	1	5.53261e-40	301.93	3	FK(1)NEDEVFAWNNEVK	-0.20014	1.56962	0.998956	2.25255	0.152374	0.0264957
map00071 Fatty acid degradation	0.000101424	2.1	A0A287ADK3	322	K	11.332	0.000279857	Up	Aldehyde dehydrogenase (NAD(+)) OS=Sus scrofa OX=9823 GN=ALDH7A1 PE=1 SV=1	ALDH7A1	K14085	1	0.00984518	102.95	2	LTK(1)AYAQIR	-0.33877	1.5294	2.12202	1.86203	0.224637	0.125655	0.136265
map00071 Fatty acid degradation	0.000101424	2.1	A0A287BG49	306	K	4.488	0.000917961	Up	Short-chain-specific acyl-CoA dehydrogenase, mitochondrial OS=Sus scrofa OX=9823 GN=ACADS PE=1 SV=1	ACADS	K00248	1	1.05069e-06	184.9	2	AFGVPLTK(1)LQGIQFK	0.43514	1.23489	1.93169	1.74005	0.440723	0.314058	0.338591
map00071 Fatty acid degradation	0.000101424	2.1	A0A287BG49	262	K	4.285	0.00455088	Up	Short-chain-specific acyl-CoA dehydrogenase, mitochondrial OS=Sus scrofa OX=9823 GN=ACADS PE=1 SV=1	ACADS	K00248	1	3.87505e-06	127.05	3	ENLLGEPGMGFK(1)IAMQTLDMGR	-0.66191	1.29993	1.86584	1.161		0.325755	0.34748
map00071 Fatty acid degradation	0.000101424	2.1	A0A287BG49	389	K	21.088	0.000102548	Up	Short-chain-specific acyl-CoA dehydrogenase, mitochondrial OS=Sus scrofa OX=9823 GN=ACADS PE=1 SV=1	ACADS	K00248	1	2.78967e-06	218.47	3	LVIAGHLLK(1)SYRS	-0.41221	2.50745	1.61607	1.60484	0.0999544	0.0686739	0.103011
map00071 Fatty acid degradation	0.000101424	2.1	A0A287BG49	208	K	3.749	0.0205058	Up	Short-chain-specific acyl-CoA dehydrogenase, mitochondrial OS=Sus scrofa OX=9823 GN=ACADS PE=1 SV=1	ACADS	K00248	1	3.98706e-07	125.04	3	SLQNK(1)GISAFLVPMPTPGLTLGK	-0.1081	1.34448	1.75932	1.14127	0.501996	0.252937
map00071 Fatty acid degradation	0.000101424	2.1	A0A287AA21	139	K	20.278	0.000317685	Up	Enoyl-CoA hydratase, mitochondrial OS=Sus scrofa OX=9823 GN=ECHS1 PE=1 SV=2	ECHS1	K07511	1	2.67594e-146	404.47	4	AFAAGADIK(1)EMQNQTFQDCYSGGFLSHWDHLSR	0.4262	2.63466		2.02096	0.096066	0.133847	0.11447
map00071 Fatty acid degradation	0.000101424	2.1	A0A287AA21	320	K	6.846	0.0125963	Up	Enoyl-CoA hydratase, mitochondrial OS=Sus scrofa OX=9823 GN=ECHS1 PE=1 SV=2	ECHS1	K07511	1	0.00959304	88.364	2	EGMTAFVEK(1)R	0.70354	1.44063	1.29248	1.82318	0.319528	0.124176
map00071 Fatty acid degradation	0.000101424	2.1	A0A287AA21	81	K	34.123	0.00143034	Up	Enoyl-CoA hydratase, mitochondrial OS=Sus scrofa OX=9823 GN=ECHS1 PE=1 SV=2	ECHS1	K07511	1	5.79872e-96	376.25	2	GK(1)SSNVGLIQLNRPK	0.042881	1.85701	1.5273	2.44486	0.109275	0.0233578	0.0381957
map00071 Fatty acid degradation	0.000101424	2.1	A0A287AA21	94	K	3.783	0.0112545	Up	Enoyl-CoA hydratase, mitochondrial OS=Sus scrofa OX=9823 GN=ECHS1 PE=1 SV=2	ECHS1	K07511	1	0.000289903	179.21	2	PK(1)ALNALCK	-1.0226	1.47849	1.44979	1.81725	0.702539	0.28967	0.262259
map00071 Fatty acid degradation	0.000101424	2.1	A0A287AJ16	45	K	3.441	0.0430235	Up	Acyl-CoA synthetase bubblegum family member 2 OS=Sus scrofa OX=9823 GN=ACSBG2 PE=1 SV=2	ACSBG2	K15013	1	7.593e-12	190.25	3	LSK(1)HGPGHETPMTIPEFFR	-0.018293	1.60297	0.666282	2.37979	0.499939	0.429165	0.421856
map00071 Fatty acid degradation	0.000101424	2.1	A0A5G2QES7	99	K	3.086	0.0307178	Up	S-(hydroxymethyl)glutathione dehydrogenase OS=Sus scrofa OX=9823 GN=ADH5 PE=1 SV=1	ADH5	K00121	1	0.00314749	114.5	2	FCLNPK(1)TNLCQK	-1.2218	1.13829	1.12488	2.26838	0.75765	0.390613	0.32019
map00071 Fatty acid degradation	0.000101424	2.1	F1SED0	425	K	11.718	0.000265981	Up	Acyl-CoA dehydrogenase short/branched chain OS=Sus scrofa OX=9823 GN=ACADSB PE=1 SV=4	ACADSB	K09478	1	1.34896e-123	409.14	3	IGTIYEGTSNIQLNTIAK(1)NVSK	3.0881	2.04105	1.63397	1.8532	0.110133	0.21613	0.145512
map00071 Fatty acid degradation	0.000101424	2.1	Q2XQV4	432	K	9.995	0.00100617	Up	Aldehyde dehydrogenase, mitochondrial OS=Sus scrofa OX=9823 GN=ALDH2 PE=2 SV=1	ALDH2	K00128	1	0.000171453	152.34	2	FK(1)TIEEVIGR	0.50264	1.99671	2.16627	1.29131	0.17112	0.119906	0.254688
map00071 Fatty acid degradation	0.000101424	2.1	Q2XQV4	379	K	12.974	0.00838091	Up	Aldehyde dehydrogenase, mitochondrial OS=Sus scrofa OX=9823 GN=ALDH2 PE=2 SV=1	ALDH2	K00128	1	0.0325645	76.827	2	ILGYIK(1)SGK	-0.12652	1.15901	1.47018	2.12645	0.176825		0.0675384
map00071 Fatty acid degradation	0.000101424	2.1	Q2XQV4	372	K	9.488	0.00431005	Up	Aldehyde dehydrogenase, mitochondrial OS=Sus scrofa OX=9823 GN=ALDH2 PE=2 SV=1	ALDH2	K00128	1	2.41837e-50	323.66	3	TEQGPQIDETQFK(1)K	-0.047026	1.28049	2.31628	1.83114	0.340705	0.103428	0.127952
map00071 Fatty acid degradation	0.000101424	2.1	Q2XQV4	280	K	23.305	0.000824426	Up	Aldehyde dehydrogenase, mitochondrial OS=Sus scrofa OX=9823 GN=ALDH2 PE=2 SV=1	ALDH2	K00128	1	7.71847e-125	406.71	2	VAFTGSTEVGHLIQVAAGK(1)SNLK	-0.42648	1.48516	2.13671	1.23907	0.078186	0.0608686
map00071 Fatty acid degradation	0.000101424	2.1	Q2XQV4	159	K	13.142	0.0225955	Up	Aldehyde dehydrogenase, mitochondrial OS=Sus scrofa OX=9823 GN=ALDH2 PE=2 SV=1	ALDH2	K00128	1	0.000621756	134.59	2	YYAGWADK(1)YHGK	-1.8788	0.940432	0.941935	2.87624	0.170285	0.0711114
map00071 Fatty acid degradation	0.000101424	2.1	A0A5G2QGJ8	155	K	11.093	0.000688087	Up	Trifunctional enzyme subunit beta, mitochondrial isoform X1(predicted) OS=Sus scrofa OX=9823 GN=HADHB PE=1 SV=1	HADHB	K07509	1	0.0124735	149.4	2	AK(1)TLGQR	1.4788	1.80152	1.63004	2.07228	0.202804	0.0949351	0.198428
map00071 Fatty acid degradation	0.000101424	2.1	A0A5G2QGJ8	299	K	9.076	0.000467515	Up	Trifunctional enzyme subunit beta, mitochondrial isoform X1(predicted) OS=Sus scrofa OX=9823 GN=HADHB PE=1 SV=1	HADHB	K07509	0.999806	4.038e-05	203.29	2	ALAMGYKPK(1)AYLR	1.5182	1.55471	1.53914	2.31069	0.148835	0.260978	0.185648
map00071 Fatty acid degradation	0.000101424	2.1	A0A5G2QGJ8	313	K	16.541	0.0020665	Up	Trifunctional enzyme subunit beta, mitochondrial isoform X1(predicted) OS=Sus scrofa OX=9823 GN=HADHB PE=1 SV=1	HADHB	K07509	1	5.64523e-62	328.59	2	DFTYVSQDPK(1)DQLLLGPTYATPK	-0.033675	1.95993		2.62435	0.190741	0.0954038	0.129585
map00071 Fatty acid degradation	0.000101424	2.1	A0A5G2QGJ8	37	K	2.493	0.0409444	Up	Trifunctional enzyme subunit beta, mitochondrial isoform X1(predicted) OS=Sus scrofa OX=9823 GN=HADHB PE=1 SV=1	HADHB	K07509	1	5.60985e-12	178.32	3	IPFLQSGTSYK(1)ELMPHDLAR	0.22899	1.58385	1.79603	0.902182	0.354256	0.755048	0.608635
map00071 Fatty acid degradation	0.000101424	2.1	A0A5G2QGJ8	146	K	35.146	1.50274e-05	Up	Trifunctional enzyme subunit beta, mitochondrial isoform X1(predicted) OS=Sus scrofa OX=9823 GN=HADHB PE=1 SV=1	HADHB	K07509	1	0.00492857	121.67	2	K(1)MMLDLNK(1)AK	-2.1626	2.03128	1.82247	1.98026	0.0417937	0.0571277	0.0670698
map00071 Fatty acid degradation	0.000101424	2.1	A0A5G2QGJ8	153	K	7.72	0.000687803	Up	Trifunctional enzyme subunit beta, mitochondrial isoform X1(predicted) OS=Sus scrofa OX=9823 GN=HADHB PE=1 SV=1	HADHB	K07509	1	0.00964011	112.3	2	MMLDLNK(1)AK	-0.042649	1.92004	1.60233	1.78957	0.321396	0.212996	0.153668
map00071 Fatty acid degradation	0.000101424	2.1	A0A5G2QGJ8	258	K	7.07	0.00151715	Up	Trifunctional enzyme subunit beta, mitochondrial isoform X1(predicted) OS=Sus scrofa OX=9823 GN=HADHB PE=1 SV=1	HADHB	K07509	1	4.45503e-17	160.9	4	LK(1)PAFIK(1)PYGTVTAANSSFLTDGASAVLIMAEEK	0.54482	1.31942	1.82457	2.1125	0.35524	0.170018	0.21825
map00071 Fatty acid degradation	0.000101424	2.1	A0A5G2QGJ8	166	K	5.194	0.000819137	Up	Trifunctional enzyme subunit beta, mitochondrial isoform X1(predicted) OS=Sus scrofa OX=9823 GN=HADHB PE=1 SV=1	HADHB	K07509	1	0.00107516	163.67	2	LSLISK(1)FR	-0.087021	1.51955	1.66216	1.24948	0.302611	0.266197
map00071 Fatty acid degradation	0.000101424	2.1	A0A5G2QGJ8	60	K	5.314	0.00903139	Up	Trifunctional enzyme subunit beta, mitochondrial isoform X1(predicted) OS=Sus scrofa OX=9823 GN=HADHB PE=1 SV=1	HADHB	K07509	1	7.61819e-06	126.91	3	TSVPK(1)DVVDYLVFGTVIQEVK	0.1673	1.20824	2.07548	1.1589		0.32443	0.232946
map00071 Fatty acid degradation	0.000101424	2.1	A0A5G2QGJ8	237	K	3.345	0.00573509	Up	Trifunctional enzyme subunit beta, mitochondrial isoform X1(predicted) OS=Sus scrofa OX=9823 GN=HADHB PE=1 SV=1	HADHB	K07509	1	1.55853e-32	248.18	3	VPGK(1)DTVTQDNGIRPSSLEQMAK(1)LK	-1.2425	1.49428	1.80172	1.32318	0.627408	0.452539	0.300879
map00071 Fatty acid degradation	0.000101424	2.1	A0A5G2RC01	243	K	14.604	0.00030976	Up	Medium-chain specific acyl-CoA dehydrogenase, mitochondrial OS=Sus scrofa OX=9823 GN=ACADM PE=3 SV=1	ACADM	K00249	1	8.82099e-144	415.89	3	IAMGTFDK(1)TRPPVAAGAVGLAQR	1.2901	2.08446	1.85368	1.67733	0.190413	0.100478	0.0936366
map00071 Fatty acid degradation	0.000101424	2.1	A0A5G2RC01	176	K	8.651	0.00162495	Up	Medium-chain specific acyl-CoA dehydrogenase, mitochondrial OS=Sus scrofa OX=9823 GN=ACADM PE=3 SV=1	ACADM	K00249	1	0.00284261	113.1	2	SDPDPK(1)APASK	0.071299	1.48828	1.81528	1.33867	0.216984		0.140773
map00071 Fatty acid degradation	0.000101424	2.1	A0A5G2RC01	275	K	5.077	0.00642079	Up	Medium-chain specific acyl-CoA dehydrogenase, mitochondrial OS=Sus scrofa OX=9823 GN=ACADM PE=3 SV=1	ACADM	K00249	1	4.62663e-12	172.91	3	TFGK(1)LLAEHQGISFLLADMAMK	0.1381	1.35397	1.237	1.82866	0.360993		0.219378
map00071 Fatty acid degradation	0.000101424	2.1	A0A5G2QGS5	189	K	7.57	0.00461557	Up	Acetyl-CoA acetyltransferase 1 OS=Sus scrofa OX=9823 GN=ACAT1 PE=1 SV=1	ACAT1	K00626	1	1.45144e-17	199.61	3	DGLTDVYNK(1)IHMGNCAENTAK	-0.045735	2.1555	2.01764		0.377836	0.183822	0.265202
map00071 Fatty acid degradation	0.000101424	2.1	A0A5G2QGS5	244	K	12.716	0.000615442	Up	Acetyl-CoA acetyltransferase 1 OS=Sus scrofa OX=9823 GN=ACAT1 PE=1 SV=1	ACAT1	K00626	1	9.35826e-08	212.59	2	GK(1)PDTVVKEDEEYKR	-0.14921	1.5701	1.94238	2.05008	0.221611	0.121732	0.0940989
map00071 Fatty acid degradation	0.000101424	2.1	A0A5G2QGS5	250	K	11.974	0.0032655	Up	Acetyl-CoA acetyltransferase 1 OS=Sus scrofa OX=9823 GN=ACAT1 PE=1 SV=1	ACAT1	K00626	1	8.23212e-40	308.74	2	GKPDTVVK(1)EDEEYKR	0.19203	1.50355	1.55256	1.68019	0.181169		0.0825359
map00071 Fatty acid degradation	0.000101424	2.1	A0A5G2QGS5	267	K	12.183	0.0100254	Up	Acetyl-CoA acetyltransferase 1 OS=Sus scrofa OX=9823 GN=ACAT1 PE=1 SV=1	ACAT1	K00626	1	0.00533267	173.11	2	LK(1)TVFQK	0.48107	1.52684	1.38348	1.83026	0.198907		0.0605114
map00071 Fatty acid degradation	0.000101424	2.1	A0A5G2QGS5	123	K	2.893	0.00648098	Up	Acetyl-CoA acetyltransferase 1 OS=Sus scrofa OX=9823 GN=ACAT1 PE=1 SV=1	ACAT1	K00626	1	4.41462e-10	151.42	3	QAVLGAGLPISTPCTTINK(1)VCASGMK	1.4209	1.05519	1.54805	1.46041	0.464522		0.471823
map00071 Fatty acid degradation	0.000101424	2.1	A0A5G2QGS5	222	K	11.922	0.00257753	Up	Acetyl-CoA acetyltransferase 1 OS=Sus scrofa OX=9823 GN=ACAT1 PE=1 SV=1	ACAT1	K00626	1	0.0158276	91.085	2	SK(1)AAWEAGK	-0.74953	2.24838	2.19285		0.26981	0.14756	0.141401
map00071 Fatty acid degradation	0.000101424	2.1	A0A5G2QGS5	262	K	25.223	0.000792457	Up	Acetyl-CoA acetyltransferase 1 OS=Sus scrofa OX=9823 GN=ACAT1 PE=1 SV=1	ACAT1	K00626	1	0.00402759	132.57	2	VDFNK(1)VPK	0.10583	1.23796	1.78037	1.85292		0.0781217	0.050632
map00071 Fatty acid degradation	0.000101424	2.1	F1ST43	113	K	12.105	0.00191586	Up	Acyl-CoA dehydrogenase very long chain OS=Sus scrofa OX=9823 GN=ACADVL PE=1 SV=4	ACADVL	K09479	1	6.37312e-52	321.01	2	FFEEVNDPAK(1)NDMLER	0.018497	1.67155	1.88789	1.9827	0.272292	0.0930265	0.0925307
map00071 Fatty acid degradation	0.000101424	2.1	F1ST43	290	K	12.18	0.00137826	Up	Acyl-CoA dehydrogenase very long chain OS=Sus scrofa OX=9823 GN=ACADVL PE=1 SV=4	ACADVL	K09479	1	8.3549e-14	248.21	2	GFGGVTHGPPEK(1)K	-0.20564	1.67705	1.58059	1.48289	0.166017	0.0934476
map00071 Fatty acid degradation	0.000101424	2.1	F1ST43	187	K	12.126	0.00191818	Up	Acyl-CoA dehydrogenase very long chain OS=Sus scrofa OX=9823 GN=ACADVL PE=1 SV=4	ACADVL	K09479	1	0.000232706	162.49	2	GILLFGTK(1)AQK	-0.16354	1.87421	1.73158	1.9371	0.271233	0.100869	0.0850053
map00071 Fatty acid degradation	0.000101424	2.1	F1ST43	474	K	2.695	0.0443985	Up	Acyl-CoA dehydrogenase very long chain OS=Sus scrofa OX=9823 GN=ACADVL PE=1 SV=4	ACADVL	K09479	1	0.0047341	105.98	2	GK(1)ELSGLGNALK	-0.72358	1.51285	2.0916	0.771605	0.689024	0.464405	0.470511
map00071 Fatty acid degradation	0.000101424	2.1	A0A5G2R8A9	239	K	12.41	0.00293313	Up	Carnitine palmitoyltransferase 2 OS=Sus scrofa OX=9823 GN=CPT2 PE=1 SV=1	CPT2	K08766	1	3.79557e-08	236.22	2	RDELFTDDK(1)AR	0.11739	1.31561	1.57245	1.85703	0.169584		0.0853244
map00071 Fatty acid degradation	0.000101424	2.1	A0A5S6HDE4	231	K	2.576	0.00250875	Up	Hydroxyacyl-coenzyme A dehydrogenase, mitochondrial OS=Sus scrofa OX=9823 GN=HADH PE=1 SV=1	HADH	K00022	1	6.94408e-05	150.09	2	GDASK(1)EDIDTAMK	0.26145	1.5284	1.65931	1.1345	0.633765	0.559479	0.484542
map00071 Fatty acid degradation	0.000101424	2.1	A0A5S6HDE4	202	K	18.551	0.000642125	Up	Hydroxyacyl-coenzyme A dehydrogenase, mitochondrial OS=Sus scrofa OX=9823 GN=HADH PE=1 SV=1	HADH	K00022	1	2.6101e-135	417.7	3	HPVSCK(1)DTPGFIVNR	0.22751	2.15088	1.56223	1.97999	0.167468	0.0746803	0.0647446
map00071 Fatty acid degradation	0.000101424	2.1	A0A5S6HDE4	68	K	2.566	0.0197806	Up	Hydroxyacyl-coenzyme A dehydrogenase, mitochondrial OS=Sus scrofa OX=9823 GN=HADH PE=1 SV=1	HADH	K00022	1	0.00335906	129.56	2	K(1)GIEESLR	-0.2846	1.35863	1.55845	1.05167		0.614864	0.41638
map00071 Fatty acid degradation	0.000101424	2.1	A0A5S6HDE4	192	K	6.499	0.000761788	Up	Hydroxyacyl-coenzyme A dehydrogenase, mitochondrial OS=Sus scrofa OX=9823 GN=HADH PE=1 SV=1	HADH	K00022	1	3.51536e-06	201.6	2	TLESLVDFSK(1)TLGK	-0.3572	1.72206	1.91896	1.55885	0.375695	0.194467	0.229971
map00071 Fatty acid degradation	0.000101424	2.1	F6PZX4	137	K	16.801	3.14326e-06	Up	Acetyl-CoA acyltransferase 2 OS=Sus scrofa OX=9823 GN=ACAA2 PE=1 SV=2	ACAA2	K07508	1	0.00067048	167.93	2	FGTK(1)LGLDLK	1.2504	1.76597	2.08118	1.8158	0.103507	0.108565	0.124983
map00071 Fatty acid degradation	0.000101424	2.1	F6PZX4	13	K	16.291	0.000218767	Up	Acetyl-CoA acyltransferase 2 OS=Sus scrofa OX=9823 GN=ACAA2 PE=1 SV=2	ACAA2	K07508	1	0.000343022	146.94	2	GVFIVAAK(1)R	-0.47461	1.94982	1.746	1.95718	0.162848	0.076179	0.107977
map00071 Fatty acid degradation	0.000101424	2.1	F6PZX4	270	K	21.734	1.75916e-05	Up	Acetyl-CoA acyltransferase 2 OS=Sus scrofa OX=9823 GN=ACAA2 PE=1 SV=2	ACAA2	K07508	1	0.000233206	175.44	3	K(1)HNFTPLAR	-0.70551	1.70119	1.88685	2.14804	0.108045	0.0778522	0.0780238
map00071 Fatty acid degradation	0.000101424	2.1	F6PZX4	234	K	6.409	0.00577129	Up	Acetyl-CoA acyltransferase 2 OS=Sus scrofa OX=9823 GN=ACAA2 PE=1 SV=2	ACAA2	K07508	1	2.84299e-22	262.64	3	PQTTLEQLSK(1)LPPVFK	-0.32349	2.02225	2.02944		0.453748	0.228696	0.26587
map00071 Fatty acid degradation	0.000101424	2.1	F1RWZ4	115	K	12.068	0.0134207	Up	Enoyl-CoA delta isomerase 2 OS=Sus scrofa OX=9823 GN=ECI2 PE=1 SV=3	ECI2	K13239	1	4.27041e-05	192.14	2	AK(1)WDAWNALGNLPK	-0.35649	1.71431	1.65152	1.37241	0.208217		0.0535376
map00071 Fatty acid degradation	0.000101424	2.1	P79274	322	K	14.64	0.00029517	Up	Long-chain specific acyl-CoA dehydrogenase, mitochondrial OS=Sus scrofa OX=9823 GN=ACADL PE=2 SV=1	ACADL	K00255	1	2.09782e-52	333.32	2	AFGK(1)TVAHIQTVQHK	-0.57567	2.53295	1.5577	1.52573	0.119276	0.0977944	0.166553
map00071 Fatty acid degradation	0.000101424	2.1	P79274	358	K	9.005	9.68821e-05	Up	Long-chain specific acyl-CoA dehydrogenase, mitochondrial OS=Sus scrofa OX=9823 GN=ACADL PE=2 SV=1	ACADL	K00255	1	1.20874e-28	280.21	3	AFVDSCLQLHETK(1)R	0.0072432	1.64867	1.61976	2.13189	0.223907	0.216686	0.159092
map00071 Fatty acid degradation	0.000101424	2.1	P79274	338	K	21.404	0.00414924	Up	Long-chain specific acyl-CoA dehydrogenase, mitochondrial OS=Sus scrofa OX=9823 GN=ACADL PE=2 SV=1	ACADL	K00255	1	3.01744e-06	217.22	2	LAELK(1)THICVTR	0.71114	1.77154	0.910347	2.16708	0.0929046		0.0581249
map00071 Fatty acid degradation	0.000101424	2.1	P79274	42	K	6.606	0.00239205	Up	Long-chain specific acyl-CoA dehydrogenase, mitochondrial OS=Sus scrofa OX=9823 GN=ACADL PE=2 SV=1	ACADL	K00255	1	0.0176554	95.531	2	LESPSAK(1)K	0.060146	1.27836	1.91531	1.34798	0.196392	0.261957
map00071 Fatty acid degradation	0.000101424	2.1	P79274	279	K	8.859	0.000186594	Up	Long-chain specific acyl-CoA dehydrogenase, mitochondrial OS=Sus scrofa OX=9823 GN=ACADL PE=2 SV=1	ACADL	K00255	1	1.47621e-19	199.94	4	LPASALLGEENK(1)GFYYLMQELPQER	1.3584	2.05909	1.53736	1.79497	0.258525	0.191481	0.158586
map00071 Fatty acid degradation	0.000101424	2.1	Q29554	262	K	7.157	0.000148423	Up	Trifunctional enzyme subunit alpha, mitochondrial OS=Sus scrofa OX=9823 GN=HADHA PE=2 SV=1	HADHA	K07515	1	0.0230026	111.39	2	DK(1)GLVEK	1.9227	1.50796	2.12247	1.63404	0.279951	0.203239	0.252339
map00071 Fatty acid degradation	0.000101424	2.1	Q29554	337	K	5.135	0.00990179	Up	Trifunctional enzyme subunit alpha, mitochondrial OS=Sus scrofa OX=9823 GN=HADHA PE=2 SV=1	HADHA	K07515	1	0.000273283	140.14	2	ESK(1)ALMGLYR	0.70982	1.50834	1.78929	1.72442	0.593777	0.169854	0.214311
map00071 Fatty acid degradation	0.000101424	2.1	Q29554	362	K	12.399	0.00224888	Up	Trifunctional enzyme subunit alpha, mitochondrial OS=Sus scrofa OX=9823 GN=HADHA PE=2 SV=1	HADHA	K07515	1	9.1233e-14	179.64	3	EVK(1)HLAILGAGLMGAGIAQVSVDK	-0.67277	1.6314	1.74674	2.17407	0.222383	0.160488	0.064918
map00071 Fatty acid degradation	0.000101424	2.1	Q29554	383	K	19.394	9.94043e-06	Up	Trifunctional enzyme subunit alpha, mitochondrial OS=Sus scrofa OX=9823 GN=HADHA PE=2 SV=1	HADHA	K07515	1	3.28254e-38	274.47	4	HLAILGAGLMGAGIAQVSVDK(1)HLK	-0.1212	2.12967	1.89821	1.67791	0.090733	0.114597	0.0888792
map00071 Fatty acid degradation	0.000101424	2.1	Q29554	644	K	15.327	0.0011441	Up	Trifunctional enzyme subunit alpha, mitochondrial OS=Sus scrofa OX=9823 GN=HADHA PE=2 SV=1	HADHA	K07515	1	8.86086e-20	266.58	2	GFYVYQEGVK(1)NR	0.60213	1.48671	2.30343	1.84236	0.198756	0.100973	0.067768
map00071 Fatty acid degradation	0.000101424	2.1	Q29554	411	K	11.934	0.000413425	Up	Trifunctional enzyme subunit alpha, mitochondrial OS=Sus scrofa OX=9823 GN=HADHA PE=2 SV=1	HADHA	K07515	1	1.50313e-28	286.45	3	GQQQVFK(1)GLNDK(1)VR	1.615	1.57651	2.0978	1.86178	0.219664	0.140402	0.103844
map00071 Fatty acid degradation	0.000101424	2.1	Q29554	309	K	9.663	0.00122596	Up	Trifunctional enzyme subunit alpha, mitochondrial OS=Sus scrofa OX=9823 GN=HADHA PE=2 SV=1	HADHA	K07515	1	5.4447e-28	256.9	3	IIDVVK(1)TGIEQGSDAGYLSESQK	-0.48788	1.59465	1.25306	2.5896	0.237413	0.19424	0.131039
map00071 Fatty acid degradation	0.000101424	2.1	Q29554	406	K	5.333	0.000909967	Up	Trifunctional enzyme subunit alpha, mitochondrial OS=Sus scrofa OX=9823 GN=HADHA PE=2 SV=1	HADHA	K07515	1	1.50313e-28	286.45	3	GQQQVFK(1)GLNDK(1)VR	1.615	1.48731	1.95748	1.60773	0.404543	0.222485	0.320456
map00071 Fatty acid degradation	0.000101424	2.1	Q29554	350	K	14.935	0.00147652	Up	Trifunctional enzyme subunit alpha, mitochondrial OS=Sus scrofa OX=9823 GN=HADHA PE=2 SV=1	HADHA	K07515	1	0.00182356	143.91	2	GQTLCK(1)K(1)NK	-0.2853	1.30268	1.99373	2.32706	0.21086	0.0863472	0.0793269
map00071 Fatty acid degradation	0.000101424	2.1	Q29554	351	K	14.935	0.00147652	Up	Trifunctional enzyme subunit alpha, mitochondrial OS=Sus scrofa OX=9823 GN=HADHA PE=2 SV=1	HADHA	K07515	1	0.00182356	143.91	2	GQTLCK(1)K(1)NK	-0.2853	1.30268	1.99373	2.32706	0.21086	0.0863472	0.0793269
map00071 Fatty acid degradation	0.000101424	2.1	Q29554	386	K	12.376	0.0015873	Up	Trifunctional enzyme subunit alpha, mitochondrial OS=Sus scrofa OX=9823 GN=HADHA PE=2 SV=1	HADHA	K07515	1	0.0143054	129.47	2	HLK(1)TILK	-0.23222	1.92691	1.70284	1.92167	0.239517	0.0732694	0.135795
map00071 Fatty acid degradation	0.000101424	2.1	Q29554	569	K	6.484	0.000221604	Up	Trifunctional enzyme subunit alpha, mitochondrial OS=Sus scrofa OX=9823 GN=HADHA PE=2 SV=1	HADHA	K07515	1	6.69682e-05	145.17	2	ILQEGVGPK(1)K	-0.45387	1.48643	2.22279	1.4891	0.264961	0.295403	0.241316
map00071 Fatty acid degradation	0.000101424	2.1	Q29554	415	K	5.846	0.000430241	Up	Trifunctional enzyme subunit alpha, mitochondrial OS=Sus scrofa OX=9823 GN=HADHA PE=2 SV=1	HADHA	K07515	1	0.0156839	109.71	2	K(1)K(1)ALTSFER	0.00556	1.54473	1.83478	1.74407	0.387967	0.259421	0.22904
map00071 Fatty acid degradation	0.000101424	2.1	Q29554	414	K	6.775	0.000281527	Up	Trifunctional enzyme subunit alpha, mitochondrial OS=Sus scrofa OX=9823 GN=HADHA PE=2 SV=1	HADHA	K07515	1	0.0196487	109.71	2	K(1)K(1)ALTSFER	0.00556	1.58979	1.87795	1.76058	0.3357	0.237865	0.198115
map00071 Fatty acid degradation	0.000101424	2.1	Q29554	597	K	49.862	0.000225682	Up	Trifunctional enzyme subunit alpha, mitochondrial OS=Sus scrofa OX=9823 GN=HADHA PE=2 SV=1	HADHA	K07515	1	1.99798e-98	345.79	4	LDSLTTSFGFPVGAATLMDEVGMDVAK(1)HVAENLGK	0.19193	1.33536	2.20761	2.33906	0.0270586	0.0610966	0.0298099
map00071 Fatty acid degradation	0.000101424	2.1	Q29554	214	K	8.368	0.0165153	Up	Trifunctional enzyme subunit alpha, mitochondrial OS=Sus scrofa OX=9823 GN=HADHA PE=2 SV=1	HADHA	K07515	1	0.000150662	100.08	3	K(1)MGLVDQLVEPLGPGLKPPEER	-0.76534	1.29578	2.1035	1.23176		0.275297	0.0936636
map00071 Fatty acid degradation	0.000101424	2.1	Q29554	292	K	7.381	9.84506e-05	Up	Trifunctional enzyme subunit alpha, mitochondrial OS=Sus scrofa OX=9823 GN=HADHA PE=2 SV=1	HADHA	K07515	1	1.84032e-12	234.92	2	K(1)QTK(1)GLYPAPLK	-0.034596	1.4069	1.90507	1.97215	0.272319	0.225776	0.217793
map00071 Fatty acid degradation	0.000101424	2.1	Q29554	295	K	7.591	0.00013527	Up	Trifunctional enzyme subunit alpha, mitochondrial OS=Sus scrofa OX=9823 GN=HADHA PE=2 SV=1	HADHA	K07515	1	1.84032e-12	234.92	2	QTK(1)GLYPAPLK(1)IIDVVK	0.38096	1.32944	2.05122	1.92096	0.245202	0.217096	0.236093
map00071 Fatty acid degradation	0.000101424	2.1	Q29554	634	K	6.425	0.011437	Up	Trifunctional enzyme subunit alpha, mitochondrial OS=Sus scrofa OX=9823 GN=HADHA PE=2 SV=1	HADHA	K07515	1	5.26918e-05	156.01	2	SGK(1)GFYVYQEGVK	0.6105	1.04396	1.88455	2.26345	0.490762	0.16206	0.155214
map00071 Fatty acid degradation	0.000101424	2.1	Q29554	285	K	23.805	0.00153919	Up	Trifunctional enzyme subunit alpha, mitochondrial OS=Sus scrofa OX=9823 GN=HADHA PE=2 SV=1	HADHA	K07515	1	0.00173611	188.81	2	K(1)VEEK(1)VR	-1.2912	1.59953	1.42516	1.83909	0.0920056	0.044207
map00071 Fatty acid degradation	0.000101424	2.1	Q29554	289	K	23.805	0.00153919	Up	Trifunctional enzyme subunit alpha, mitochondrial OS=Sus scrofa OX=9823 GN=HADHA PE=2 SV=1	HADHA	K07515	1	0.00173611	188.81	2	K(1)VEEK(1)VR	-1.2912	1.59953	1.42516	1.83909	0.0920056	0.044207
map00071 Fatty acid degradation	0.000101424	2.1	Q29554	735	K	3.491	0.0118892	Up	Trifunctional enzyme subunit alpha, mitochondrial OS=Sus scrofa OX=9823 GN=HADHA PE=2 SV=1	HADHA	K07515	1	0.0119138	104.06	2	K(1)YEAIYGK	0.26186	1.23405	2.03733	1.39269	0.638898	0.430363	0.266668
map00071 Fatty acid degradation	0.000101424	2.1	Q29554	742	K	7.604	0.0174953	Up	Trifunctional enzyme subunit alpha, mitochondrial OS=Sus scrofa OX=9823 GN=HADHA PE=2 SV=1	HADHA	K07515	1	3.33074e-56	310.9	3	YEAIYGK(1)QFTPCQLLIDHASSPNK	-0.40933	2.1914	0.973562	2.13768	0.472701	0.137778	0.0868798
map00071 Fatty acid degradation	0.000101424	2.1	Q29554	534	K	4.968	0.000506262	Up	Trifunctional enzyme subunit alpha, mitochondrial OS=Sus scrofa OX=9823 GN=HADHA PE=2 SV=1	HADHA	K07515	1	0.00874134	105.14	2	QGK(1)VIIVVK	0.043046	1.36823	1.52781	2.09859	0.391651	0.323143	0.290575
map00071 Fatty acid degradation	0.000101424	2.1	Q29554	540	K	14.449	0.000158613	Up	Trifunctional enzyme subunit alpha, mitochondrial OS=Sus scrofa OX=9823 GN=HADHA PE=2 SV=1	HADHA	K07515	1	7.99001e-16	250.94	2	VIIVVK(1)DGPGFYTTR	-0.12074	1.60044	2.05039	1.96079	0.178844	0.100987	0.108549
map00071 Fatty acid degradation	0.000101424	2.1	Q29554	625	K	7.608	0.00111284	Up	Trifunctional enzyme subunit alpha, mitochondrial OS=Sus scrofa OX=9823 GN=HADHA PE=2 SV=1	HADHA	K07515	1	0.0025854	118.5	2	QMISK(1)GFLGR	-0.27704	1.1603	1.70591	2.43674	0.275322	0.229837	0.191894
map00071 Fatty acid degradation	0.000101424	2.1	Q29554	505	K	6.295	0.000205172	Up	Trifunctional enzyme subunit alpha, mitochondrial OS=Sus scrofa OX=9823 GN=HADHA PE=2 SV=1	HADHA	K07515	1	1.51822e-08	153.88	3	VIGMHYFSPVDK(1)MQLLEIITTEK(1)TSK	-0.39814	1.33542	1.74453	2.09761	0.265787	0.302348	0.254302
map00071 Fatty acid degradation	0.000101424	2.1	Q29554	46	K	8.052	0.000393129	Up	Trifunctional enzyme subunit alpha, mitochondrial OS=Sus scrofa OX=9823 GN=HADHA PE=2 SV=1	HADHA	K07515	1	3.54276e-40	307.15	3	THINYGVK(1)GDVAVIR	-0.22291	1.61211	1.97531	1.74975	0.298486	0.205942	0.158402
map00071 Fatty acid degradation	0.000101424	2.1	Q29554	249	K	26.732	0.000913743	Up	Trifunctional enzyme subunit alpha, mitochondrial OS=Sus scrofa OX=9823 GN=HADHA PE=2 SV=1	HADHA	K07515	1	1.15063e-11	195.1	2	TIEYLEEVAVTFAK(1)GLADK	0.45096	1.91777	1.70262	1.25795	0.0458436		0.0758183
map00190 Oxidative phosphorylation	7.33456e-06	1.69	F1SM98	68	K	11.529	0.0011361	Up	NADH dehydrogenase [ubiquinone] flavoprotein 2, mitochondrial OS=Sus scrofa OX=9823 GN=NDUFV2 PE=1 SV=2	NDUFV2	K03943	1	6.07472e-06	187.31	3	RIEAIVK(1)NYPEGHK	0.20638	2.14107	1.2662	2.11384	0.242565	0.111799	0.124522
map00190 Oxidative phosphorylation	7.33456e-06	1.69	F1SM98	75	K	2.801	0.0175479	Up	NADH dehydrogenase [ubiquinone] flavoprotein 2, mitochondrial OS=Sus scrofa OX=9823 GN=NDUFV2 PE=1 SV=2	NDUFV2	K03943	1	0.000534222	85.932	3	NYPEGHK(1)AAAVLPVLDLAQR	-1.0777	1.5731	1.37445			0.589812	0.462634
map00190 Oxidative phosphorylation	7.33456e-06	1.69	F1SM98	129	K	8.43	0.00183162	Up	NADH dehydrogenase [ubiquinone] flavoprotein 2, mitochondrial OS=Sus scrofa OX=9823 GN=NDUFV2 PE=1 SV=2	NDUFV2	K03943	0.999999	1.39096e-11	187.39	3	KPVGK(1)YHIQVCTTTPCMLR	-0.40942	1.15603	2.30693	1.90077	0.303165	0.15366	0.179452
map00190 Oxidative phosphorylation	7.33456e-06	1.69	F1SM98	154	K	9.941	0.000565708	Up	NADH dehydrogenase [ubiquinone] flavoprotein 2, mitochondrial OS=Sus scrofa OX=9823 GN=NDUFV2 PE=1 SV=2	NDUFV2	K03943	1	1.26195e-13	251.43	2	NSDSILEAIQK(1)K	0.38184	1.79098	2.08905	1.57155	0.269162	0.143711	0.135543
map00190 Oxidative phosphorylation	7.33456e-06	1.69	A0A286ZUN9	34	K	2.509	0.0476594	Up	Complex I-23kD OS=Sus scrofa OX=9823 GN=NDUFS8 PE=1 SV=2	NDUFS8	K03941	1	0.00333812	113.47	2	EPSMDMK(1)SVTDR	-0.027836	1.4719	1.59257	0.885955	0.421691	0.627889
map00190 Oxidative phosphorylation	7.33456e-06	1.69	A0A5G2R4S0	101	K	8.453	0.000592505	Up	ATP synthase subunit b OS=Sus scrofa OX=9823 GN=ATP5PB PE=1 SV=1	ATP5PB	K02127	1	0.000182826	187	2	SQQALVQK(1)R	1.5433	1.3181	2.33146	1.71573	0.271491	0.170619	0.192593
map00190 Oxidative phosphorylation	7.33456e-06	1.69	A0A287A2Y4	72	K	7.357	0.00117247	Up	ATP synthase subunit d, mitochondrial OS=Sus scrofa OX=9823 GN=ATP5PD PE=1 SV=1	ATP5PD	K02138	1	0.000261988	138.98	2	ATVAK(1)AGLVDDFEK(1)K	0.28055	1.91653	1.58483	1.78071	0.363496	0.166587	0.187844
map00190 Oxidative phosphorylation	7.33456e-06	1.69	A0A287A2Y4	32	K	2.864	0.02406	Up	ATP synthase subunit d, mitochondrial OS=Sus scrofa OX=9823 GN=ATP5PD PE=1 SV=1	ATP5PD	K02138	1	1.40463e-30	286.61	3	AIANSLK(1)SWNETLSTR	-0.32778	1.11065	1.46278	1.87393	0.688397	0.284448	0.579791
map00190 Oxidative phosphorylation	7.33456e-06	1.69	A0A287A2Y4	63	K	1.771	0.0320767	Up	ATP synthase subunit d, mitochondrial OS=Sus scrofa OX=9823 GN=ATP5PD PE=1 SV=1	ATP5PD	K02138	1	1.91006e-05	177.1	2	ATVAK(1)AGLVDDFEK(1)K	0.28055	1.16394	1.45512	1.21576	0.967286	0.659947	0.537943
map00190 Oxidative phosphorylation	7.33456e-06	1.69	A0A287A2Y4	148	K	6.912	0.00528176	Up	ATP synthase subunit d, mitochondrial OS=Sus scrofa OX=9823 GN=ATP5PD PE=1 SV=1	ATP5PD	K02138	1	7.26341e-05	145.29	3	K(1)K(1)YPYWPHRPIESL	0.044469	1.10346	1.89271	1.56397	0.26881	0.171044
map00190 Oxidative phosphorylation	7.33456e-06	1.69	A0A287A2Y4	149	K	15.105	0.000870008	Up	ATP synthase subunit d, mitochondrial OS=Sus scrofa OX=9823 GN=ATP5PD PE=1 SV=1	ATP5PD	K02138	1	7.26341e-05	193.96	2	K(1)YPYWPHRPIESL	0.72367	1.63458	2.00677	1.98609	0.20609	0.0759565	0.0905098
map00190 Oxidative phosphorylation	7.33456e-06	1.69	A0A287A2Y4	123	K	7.854	0.00734106	Up	ATP synthase subunit d, mitochondrial OS=Sus scrofa OX=9823 GN=ATP5PD PE=1 SV=1	ATP5PD	K02138	1	5.87873e-09	158.17	3	MK(1)NIIPFDQMTIEDLNEVFPETK	0.0019063	1.2836	1.58666	2.45207	0.412609	0.113884	0.151176
map00190 Oxidative phosphorylation	7.33456e-06	1.69	A0A287A2Y4	144	K	10.705	0.00508917	Up	ATP synthase subunit d, mitochondrial OS=Sus scrofa OX=9823 GN=ATP5PD PE=1 SV=1	ATP5PD	K02138	1	9.44138e-18	188.58	3	NIIPFDQMTIEDLNEVFPETK(1)LDK	0.53789	1.96876	2.12742	1.39122	0.324482	0.114467	0.0736532
map00190 Oxidative phosphorylation	7.33456e-06	1.69	A0A287A2Y4	99	K	6.393	0.00356443	Up	ATP synthase subunit d, mitochondrial OS=Sus scrofa OX=9823 GN=ATP5PD PE=1 SV=1	ATP5PD	K02138	1	6.46991e-80	355.67	2	YTALVDAEEQEDVK(1)R	2.9863	1.64586	1.67357	1.86901	0.455108	0.164364	0.192083
map00190 Oxidative phosphorylation	7.33456e-06	1.69	F1SKM0	225	K	8.668	0.000441534	Up	Ubiquinol-cytochrome c reductase core protein 1 OS=Sus scrofa OX=9823 GN=UQCRC1 PE=1 SV=3	UQCRC1	K00414	1	5.6637e-80	361.65	2	ADLTEYVSQHYK(1)APR	-0.23748	1.28386	2.30089	1.79467	0.253063	0.191409	0.176107
map00190 Oxidative phosphorylation	7.33456e-06	1.69	F1SKM0	85	K	14.469	6.61846e-06	Up	Ubiquinol-cytochrome c reductase core protein 1 OS=Sus scrofa OX=9823 GN=UQCRC1 PE=1 SV=3	UQCRC1	K00414	1	9.89178e-26	261.99	3	YENEK(1)NNGAGYFVEHLAFK	1.9817	1.7541	2.10574	1.75229	0.143507	0.115938	0.128437
map00190 Oxidative phosphorylation	7.33456e-06	1.69	A0A5G2QK91	30	K	12.153	0.000286857	Up	ATP synthase subunit OS=Sus scrofa OX=9823 GN=ATP5MG PE=1 SV=1	ATP5MG	K02140	1	1.84407e-10	130.51	4	LATFWHYAK(1)VELVPPTPAEIPTAIQSLK	0.34295	1.59495	1.72394	2.22495	0.192848	0.160486	0.10283
map00190 Oxidative phosphorylation	7.33456e-06	1.69	A0A287A9I8	66	K	18.036	0.000416059	Up	ATP synthase subunit gamma OS=Sus scrofa OX=9823 GN=ATP5F1C PE=1 SV=2	ATP5F1C	K02136	1	4.48544e-13	244.24	3	K(1)HLIIGVSSDR	0.12083	1.66008	1.5812	2.44353	0.147671	0.101623	0.0658968
map00190 Oxidative phosphorylation	7.33456e-06	1.69	A0A287A9I8	238	K	4.294	0.0366704	Up	ATP synthase subunit gamma OS=Sus scrofa OX=9823 GN=ATP5F1C PE=1 SV=2	ATP5F1C	K02136	1	2.4141e-43	302.28	2	MTAMDNASK(1)NASEMIDK	-0.81589	1.30779	1.17205	1.84815	0.500644	0.171365
map00190 Oxidative phosphorylation	7.33456e-06	1.69	A0A287A9I8	91	K	9.588	0.00257895	Up	ATP synthase subunit gamma OS=Sus scrofa OX=9823 GN=ATP5F1C PE=1 SV=2	ATP5F1C	K02136	1	1.56419e-10	238.92	2	QIK(1)SEVANLTAAGK	0.24297	1.92458	1.30582	2.20294	0.303776	0.158648	0.104231
map00190 Oxidative phosphorylation	7.33456e-06	1.69	A0A287A9I8	173	K	34.711	0.0006569	Up	ATP synthase subunit gamma OS=Sus scrofa OX=9823 GN=ATP5F1C PE=1 SV=2	ATP5F1C	K02136	1	2.26454e-42	229.71	2	SVISYK(1)TEEK	-0.14883	2.0806	1.84087	1.91051	0.102915	0.0333116	0.0317885
map00190 Oxidative phosphorylation	7.33456e-06	1.69	A0A287AAR5	151	K	4.303	0.00791817	Up	Acyl carrier protein OS=Sus scrofa OX=9823 GN=NDUFAB1 PE=1 SV=1	NDUFAB1	K03955	1	1.20085e-08	156.69	2	LMCPQEIVDYIADK(1)K	-0.18078	1.46521	1.78049		0.344468	0.40983
map00190 Oxidative phosphorylation	7.33456e-06	1.69	P13618	67	K	3.633	0.0252941	Up	ATP synthase-coupling factor 6, mitochondrial OS=Sus scrofa OX=9823 GN=ATP5PF PE=1 SV=1	ATP5PF	K02131	0.998527	0.0114483	58.272	3	ADMNTFPNFTFEDPK(0.999)FEAVEK(0.001)PQS	-1.2517		1.79893	1.33762		0.494988	0.368457
map00190 Oxidative phosphorylation	7.33456e-06	1.69	P13618	47	K	10.17	0.00150594	Up	ATP synthase-coupling factor 6, mitochondrial OS=Sus scrofa OX=9823 GN=ATP5PF PE=1 SV=1	ATP5PF	K02131	1	0.0146676	123.99	2	LK(1)QMYGK	0.028819	1.45186	1.68741	2.32359	0.277685	0.108966	0.150486
map00190 Oxidative phosphorylation	7.33456e-06	1.69	A0A287AE88	256	K	18.833	0.000103074	Up	NADH:ubiquinone oxidoreductase subunit A9 OS=Sus scrofa OX=9823 GN=NDUFA9 PE=1 SV=1	NDUFA9	K03953	1	4.43616e-05	203.29	2	GK(1)TFAFVGPNR	1.7123	1.58854	1.74365	2.36528	0.132125	0.0818969	0.0885017
map00190 Oxidative phosphorylation	7.33456e-06	1.69	A0A287AE88	170	K	11.943	0.000431517	Up	NADH:ubiquinone oxidoreductase subunit A9 OS=Sus scrofa OX=9823 GN=NDUFA9 PE=1 SV=1	NDUFA9	K03953	1	5.20566e-52	323.68	2	LIHISHLNADIK(1)SPSR	-0.093474	2.32598	1.43745	1.77301	0.134029	0.214387	0.115148
map00190 Oxidative phosphorylation	7.33456e-06	1.69	F1RPS8	517	K	2.54	0.00416139	Up	ATP synthase subunit alpha OS=Sus scrofa OX=9823 GN=ATP5F1A PE=1 SV=3	ATP5F1A	K02132	1	5.69356e-05	170.89	2	ADGK(1)ISEETDAK(1)LK	0.41523	1.3169	1.58469	1.4034	0.745737	0.456061	0.493214
map00190 Oxidative phosphorylation	7.33456e-06	1.69	F1RPS8	525	K	12.748	0.000317467	Up	ATP synthase subunit alpha OS=Sus scrofa OX=9823 GN=ATP5F1A PE=1 SV=3	ATP5F1A	K02132	1	5.69356e-05	142.12	2	ISEETDAK(1)LK	0.37504	1.73268	1.85668	1.9742	0.205298	0.135448	0.0956943
map00190 Oxidative phosphorylation	7.33456e-06	1.69	F1RPS8	527	K	12.568	0.00267292	Up	ATP synthase subunit alpha OS=Sus scrofa OX=9823 GN=ATP5F1A PE=1 SV=3	ATP5F1A	K02132	1	0.000536066	124.1	2	LK(1)EIVTNFLAGFEA	0.10938	1.50475	3.13778	0.915246	0.146854	0.133107	0.162262
map00190 Oxidative phosphorylation	7.33456e-06	1.69	F1RPS8	291	K	21.279	0.000154629	Up	ATP synthase subunit alpha OS=Sus scrofa OX=9823 GN=ATP5F1A PE=1 SV=3	ATP5F1A	K02132	1	2.91638e-65	349.01	2	DNGK(1)HALIIYDDLSK	-0.018784	1.55562	1.62106	2.55401	0.118627	0.0742585	0.0764279
map00190 Oxidative phosphorylation	7.33456e-06	1.69	F1RPS8	302	K	3.929	0.0151285	Up	ATP synthase subunit alpha OS=Sus scrofa OX=9823 GN=ATP5F1A PE=1 SV=3	ATP5F1A	K02132	1	5.95734e-83	361.51	2	HALIIYDDLSK(1)QAVAYR	-0.44899	1.89732	0.948302	1.93722	0.494625	0.484684	0.237856
map00190 Oxidative phosphorylation	7.33456e-06	1.69	F1RPS8	118	K	12.854	0.00115534	Up	ATP synthase subunit alpha OS=Sus scrofa OX=9823 GN=ATP5F1A PE=1 SV=3	ATP5F1A	K02132	1	0.019564	107.67	2	LIK(1)EGDIVK(1)R	-0.44145	1.49119	1.83265	2.24306	0.208517	0.147838	0.0767422
map00190 Oxidative phosphorylation	7.33456e-06	1.69	F1RPS8	225	K	13.364	0.000649063	Up	ATP synthase subunit alpha OS=Sus scrofa OX=9823 GN=ATP5F1A PE=1 SV=3	ATP5F1A	K02132	1	0.000260482	187	2	FNDGTDEK(1)K	1.2035	1.90015	1.87754	1.8046	0.198672	0.0773178	0.141718
map00190 Oxidative phosphorylation	7.33456e-06	1.69	F1RPS8	153	K	11.08	0.000458136	Up	ATP synthase subunit alpha OS=Sus scrofa OX=9823 GN=ATP5F1A PE=1 SV=3	ATP5F1A	K02132	1	0.00107516	163.67	3	VVDALGNAIDGK(1)GPIGSK(1)TR	0.46658	1.52481	1.77889	2.1996	0.234481	0.145184	0.117033
map00190 Oxidative phosphorylation	7.33456e-06	1.69	F1RPS8	489	K	4.906	0.00358561	Up	ATP synthase subunit alpha OS=Sus scrofa OX=9823 GN=ATP5F1A PE=1 SV=3	ATP5F1A	K02132	1	0.0159255	106.11	2	LEPSK(1)ITK	-0.29687	1.34368	1.9286	1.71175	0.499739	0.301569	0.214658
map00190 Oxidative phosphorylation	7.33456e-06	1.69	F1RPS8	492	K	6.016	0.000202898	Up	ATP synthase subunit alpha OS=Sus scrofa OX=9823 GN=ATP5F1A PE=1 SV=3	ATP5F1A	K02132	1	9.77516e-19	211.96	4	ITK(1)FENAFLSHVISQHQALLGK(1)IR	-0.80662	1.4855	1.9846	1.67475	0.344308	0.235519	0.275315
map00190 Oxidative phosphorylation	7.33456e-06	1.69	F1RPS8	204	K	13.971	0.00822167	Up	ATP synthase subunit alpha OS=Sus scrofa OX=9823 GN=ATP5F1A PE=1 SV=3	ATP5F1A	K02132	1	2.63052e-08	207.27	2	QTGK(1)TSIAIDTIINQK	-0.20179	1.65896	0.938535	3.00173	0.259749	0.0579558	0.0830745
map00190 Oxidative phosphorylation	7.33456e-06	1.69	F1RPS8	216	K	10.857	0.000844146	Up	ATP synthase subunit alpha OS=Sus scrofa OX=9823 GN=ATP5F1A PE=1 SV=3	ATP5F1A	K02132	1	3.16164e-20	267.45	2	TSIAIDTIINQK(1)R	0.36045	1.42636	1.75603	2.31158	0.248026	0.143629	0.114375
map00190 Oxidative phosphorylation	7.33456e-06	1.69	F1RPS8	247	K	11.878	0.00410941	Up	ATP synthase subunit alpha OS=Sus scrofa OX=9823 GN=ATP5F1A PE=1 SV=3	ATP5F1A	K02132	1	4.16252e-05	198.73	2	STVAQLVK(1)R	0.1271		1.95336	2.48603	0.278668	0.154268	0.127669
map00190 Oxidative phosphorylation	7.33456e-06	1.69	F1RPS8	147	K	13.599	0.000386044	Up	ATP synthase subunit alpha OS=Sus scrofa OX=9823 GN=ATP5F1A PE=1 SV=3	ATP5F1A	K02132	1	1.42079e-43	303.02	3	VVDALGNAIDGK(1)GPIGSK(1)TR	0.46658	1.44201	1.54333	1.781		0.135972	0.0976911
map00190 Oxidative phosphorylation	7.33456e-06	1.69	A0A287AND7	51	K	11.329	0.00233423	Up	Cytochrome c oxidase subunit OS=Sus scrofa OX=9823 GN=COX6B2 PE=3 SV=1	COX6B2	K02267	1	1.65083e-05	207.86	2	GK(1)STQPCEYYFR	0.36771	1.58823	1.30041	2.62468	0.257093	0.134558	0.0950241
map00190 Oxidative phosphorylation	7.33456e-06	1.69	A0A287AND7	13	K	3.896	0.0329626	Up	Cytochrome c oxidase subunit OS=Sus scrofa OX=9823 GN=COX6B2 PE=3 SV=1	COX6B2	K02267	1	0.00381735	107.21	2	GK(1)WPTPPFDPR	0.49931	1.68978	1.92042		0.656327	0.489932	0.243539
map00190 Oxidative phosphorylation	7.33456e-06	1.69	A0A287AND7	8	K	4.677	0.0113222	Up	Cytochrome c oxidase subunit OS=Sus scrofa OX=9823 GN=COX6B2 PE=3 SV=1	COX6B2	K02267	1	0.000114053	155.42	2	MLGIDFQK(1)SSK	-0.072396	1.31088	1.24434	2.38781	0.547001	0.307165	0.202809
map00190 Oxidative phosphorylation	7.33456e-06	1.69	F1SHD7	87	K	11.487	0.00193298	Up	NADH-ubiquinone oxidoreductase 75 kDa subunit, mitochondrial OS=Sus scrofa OX=9823 GN=NDUFS1 PE=1 SV=4	NDUFS1	K03934	1	5.26838e-05	177.57	2	APK(1)VVAACAMPVMK	0.41895	1.69066	1.4873	2.34153	0.257129	0.084565	0.138823
map00190 Oxidative phosphorylation	7.33456e-06	1.69	F1SHD7	607	K	14.873	0.00225518	Up	NADH-ubiquinone oxidoreductase 75 kDa subunit, mitochondrial OS=Sus scrofa OX=9823 GN=NDUFS1 PE=1 SV=4	NDUFS1	K03934	1	1.45438e-06	155.88	2	AQQTK(1)VAVTPPGLAR	0.40313	1.62194	1.08315	2.91692	0.196252	0.0863795	0.0953633
map00190 Oxidative phosphorylation	7.33456e-06	1.69	F1SHD7	562	K	12.02	0.000279519	Up	NADH-ubiquinone oxidoreductase 75 kDa subunit, mitochondrial OS=Sus scrofa OX=9823 GN=NDUFS1 PE=1 SV=4	NDUFS1	K03934	1	2.53758e-06	87.842	4	QDLPK(1)DCFIIYQGHHGDVGAPMADVILPGAAYTEK	0.21254	1.45309	1.72306	1.56112	0.11241		0.150324
map00190 Oxidative phosphorylation	7.33456e-06	1.69	A0A287AS93	20	K	18.852	0.00278364	Up	Complex I-B12 OS=Sus scrofa OX=9823 GN=NDUFB3 PE=1 SV=1	NDUFB3	K03959	1	0.000489868	166.16	2	MELPDYK(1)QWK	0.63237	1.39567	2.59377	1.70832	0.194113	0.0467674	0.0613533
map00190 Oxidative phosphorylation	7.33456e-06	1.69	A0A287AZF9	311	K	6.232	0.00125867	Up	Cytochrome c1 OS=Sus scrofa OX=9823 GN=CYC1 PE=1 SV=1	CYC1	K00413	1	0.0142064	126.52	2	HK(1)WSVLK	0.10783	2.0085	2.0215		0.404383	0.286648	0.278968
map00190 Oxidative phosphorylation	7.33456e-06	1.69	A0A287AZF9	316	K	11.245	0.00166975	Up	Cytochrome c1 OS=Sus scrofa OX=9823 GN=CYC1 PE=1 SV=1	CYC1	K00413	1	0.0166971	120.92	2	WSVLK(1)SR	-0.02028	1.62946	1.48939	2.39115	0.264539	0.0977829	0.127682
map00190 Oxidative phosphorylation	7.33456e-06	1.69	A0A287BAW0	40	K	23.209	0.000223693	Up	Complex I subunit B13 OS=Sus scrofa OX=9823 GN=NDUFA5 PE=1 SV=2	NDUFA5	K03949	1	1.49116e-15	244.01	3	ILDVLGQIPK(1)NAAYR	0.10273	1.90851	1.39317	2.45047	0.109183	0.0570353	0.0816245
map00190 Oxidative phosphorylation	7.33456e-06	1.69	A0A287BAW0	30	K	14.001	0.00158262	Up	Complex I subunit B13 OS=Sus scrofa OX=9823 GN=NDUFA5 PE=1 SV=2	NDUFA5	K03949	1	8.21132e-07	176.05	3	ILYTK(1)ILDVLGQIPK	-0.13674	1.35887	1.2812	2.95994	0.186344	0.0905577	0.123084
map00190 Oxidative phosphorylation	7.33456e-06	1.69	A0A287BAW0	25	K	11.411	0.000579019	Up	Complex I subunit B13 OS=Sus scrofa OX=9823 GN=NDUFA5 PE=1 SV=2	NDUFA5	K03949	1	0.0141982	139.68	2	LK(1)ILYTK	0.1959	1.70624	1.72492	2.08539	0.227365	0.0985259	0.157565
map00190 Oxidative phosphorylation	7.33456e-06	1.69	A0A287BAW0	98	K	8.538	0.000394955	Up	Complex I subunit B13 OS=Sus scrofa OX=9823 GN=NDUFA5 PE=1 SV=2	NDUFA5	K03949	1	1.67471e-10	187.44	2	WK(1)PWEPLVEEPPANQWK	-0.046323	1.78748	1.86392	1.71954	0.297039	0.176695	0.155322
map00190 Oxidative phosphorylation	7.33456e-06	1.69	A0A287BGN0	82	K	11.311	0.0158429	Up	Cytochrome c oxidase subunit OS=Sus scrofa OX=9823 GN=COX6A1 PE=1 SV=2	COX6A1	K02266	1	3.37954e-11	140.42	3	SK(1)PFPWGDGNHTLFHNPHVNPLPTGYEDE	0.12245	1.13388	0.964894	2.62294	0.187416		0.0908705
map00190 Oxidative phosphorylation	7.33456e-06	1.69	A0A2C9F3A3	162	K	13.487	0.000396689	Up	ATP synthase peripheral stalk subunit OSCP OS=Sus scrofa OX=9823 GN=ATP5PO PE=3 SV=1	ATP5PO	K02137	1	0.00154211	131.44	2	TVLK(1)SFLSK	0.69706	2.08186	1.54456	1.95942	0.198325	0.123964	0.0918761
map00190 Oxidative phosphorylation	7.33456e-06	1.69	A0A2C9F3A3	54	K	3.295	0.000528022	Up	ATP synthase peripheral stalk subunit OSCP OS=Sus scrofa OX=9823 GN=ATP5PO PE=3 SV=1	ATP5PO	K02137	1	9.69164e-06	204.79	2	QNK(1)LEQVEK	2.6593	1.39422	1.54617	1.66272	0.562289	0.390779	0.443826
map00190 Oxidative phosphorylation	7.33456e-06	1.69	A0A2C9F3A3	90	K	7.594	0.00189092	Up	ATP synthase peripheral stalk subunit OSCP OS=Sus scrofa OX=9823 GN=ATP5PO PE=3 SV=1	ATP5PO	K02137	1	0.00185402	121.73	2	VK(1)SLSDMTAK	-0.08359	1.64903	1.52195	2.13086	0.366611	0.153366	0.178175
map00190 Oxidative phosphorylation	7.33456e-06	1.69	A0A2C9F3A3	199	K	3.734	0.00703002	Up	ATP synthase peripheral stalk subunit OSCP OS=Sus scrofa OX=9823 GN=ATP5PO PE=3 SV=1	ATP5PO	K02137	1	0.00784711	107.57	2	YVDMSAK(1)TK	-0.84839		1.96565	1.60134	0.602422	0.465235	0.365349
map00190 Oxidative phosphorylation	7.33456e-06	1.69	A0A5G2QGD4	63	K	50.235	0.000127425	Up	Complex I-B17 OS=Sus scrofa OX=9823 GN=NDUFB6 PE=1 SV=1	NDUFB6	K03962	1	0.00750474	119.41	2	NVIYK(1)TYR	-0.15257	1.83957	1.33555	1.75939		0.0292825	0.0362037
map00190 Oxidative phosphorylation	7.33456e-06	1.69	A0A5G2Q729	7	K	3.058	0.00774284	Up	Complex I-B16.6 OS=Sus scrofa OX=9823 GN=NDUFA13 PE=1 SV=1	NDUFA13	K11353	1	7.35761e-11	196.11	3	VK(1)QDMPPPGGYGPIDYK	0.13243	1.06478	1.53727	1.503	0.496041		0.39891
map00190 Oxidative phosphorylation	7.33456e-06	1.69	A0A5G2Q7D7	403	K	13.601	0.0052492	Up	Succinate dehydrogenase [ubiquinone] flavoprotein subunit, mitochondrial OS=Sus scrofa OX=9823 GN=SDHA PE=1 SV=1	SDHA	K00234	1	1.52895e-09	143.67	3	EPIPVLPTVHYNMGGIPTNYK(1)GQVLR	0.20989	1.04884	1.53598	2.18155	0.151655	0.0819672
map00190 Oxidative phosphorylation	7.33456e-06	1.69	A0A5G2Q7D7	618	K	17.909	0.000138406	Up	Succinate dehydrogenase [ubiquinone] flavoprotein subunit, mitochondrial OS=Sus scrofa OX=9823 GN=SDHA PE=1 SV=1	SDHA	K00234	1	9.70185e-38	304.69	2	KHTLSYVDVK(1)TGK	0.94393	1.50972	2.18077	1.99221	0.143476	0.0912927	0.0825322
map00190 Oxidative phosphorylation	7.33456e-06	1.69	A0A5G2Q7D7	621	K	14.579	0.00224644	Up	Succinate dehydrogenase [ubiquinone] flavoprotein subunit, mitochondrial OS=Sus scrofa OX=9823 GN=SDHA PE=1 SV=1	SDHA	K00234	1	2.22594e-05	201.08	2	TGK(1)VSLEYRPVIDK	-0.32477	1.47654	2.60313	1.5352	0.228119	0.0789367	0.0780722
map00190 Oxidative phosphorylation	7.33456e-06	1.69	A0A5G2Q7D7	609	K	16.85	0.00329632	Up	Succinate dehydrogenase [ubiquinone] flavoprotein subunit, mitochondrial OS=Sus scrofa OX=9823 GN=SDHA PE=1 SV=1	SDHA	K00234	1	1.2097e-08	230.65	2	K(1)HTLSYVDVK	-0.039667	1.63913	1.22258	2.80215	0.208956	0.068536	0.0586466
map00190 Oxidative phosphorylation	7.33456e-06	1.69	A0A5G2Q7D7	601	K	18.437	0.000257543	Up	Succinate dehydrogenase [ubiquinone] flavoprotein subunit, mitochondrial OS=Sus scrofa OX=9823 GN=SDHA PE=1 SV=1	SDHA	K00234	1	0.000351671	191.78	2	K(1)PFQEHWR	-0.90598	1.51213	1.74141	1.57198		0.0718538	0.10263
map00190 Oxidative phosphorylation	7.33456e-06	1.69	A0A5G2Q7D7	502	K	24.072	0.000141869	Up	Succinate dehydrogenase [ubiquinone] flavoprotein subunit, mitochondrial OS=Sus scrofa OX=9823 GN=SDHA PE=1 SV=1	SDHA	K00234	1	5.56749e-115	397.21	3	LSMQK(1)SMQSHAAVFR	-0.31541	1.32691	1.79588	2.6379	0.0826575	0.0655513	0.0911046
map00190 Oxidative phosphorylation	7.33456e-06	1.69	A0A5G2Q7D7	535	K	28.965	0.000980542	Up	Succinate dehydrogenase [ubiquinone] flavoprotein subunit, mitochondrial OS=Sus scrofa OX=9823 GN=SDHA PE=1 SV=1	SDHA	K00234	1	7.31035e-20	259.18	2	LYGDLQHLK(1)TFDR	0.23783	1.55404	1.48144	2.76429	0.116324	0.0383939	0.0455149
map00190 Oxidative phosphorylation	7.33456e-06	1.69	A0A5G2Q7D7	632	K	15.588	0.0355643	Up	Succinate dehydrogenase [ubiquinone] flavoprotein subunit, mitochondrial OS=Sus scrofa OX=9823 GN=SDHA PE=1 SV=1	SDHA	K00234	1	9.03941e-143	424.08	4	VSLEYRPVIDK(1)TLNEADCATVPPAIR	0.11992	2.07028	0.951549	1.7731	0.184902		0.0201647
map00190 Oxidative phosphorylation	7.33456e-06	1.69	A0A5G2Q7D7	152	K	6.259	8.69518e-05	Up	Succinate dehydrogenase [ubiquinone] flavoprotein subunit, mitochondrial OS=Sus scrofa OX=9823 GN=SDHA PE=1 SV=1	SDHA	K00234	1	0.000326422	159.2	2	TEDGK(1)IYQR	-0.53423	1.49227	2.09631	1.58487	0.277814	0.29475	0.253985
map00190 Oxidative phosphorylation	7.33456e-06	1.69	A0A5G2Q7D7	600	K	11.974	0.00277925	Up	Succinate dehydrogenase [ubiquinone] flavoprotein subunit, mitochondrial OS=Sus scrofa OX=9823 GN=SDHA PE=1 SV=1	SDHA	K00234	1	1.26078e-07	183	3	VDEYDYSKPIQGQQK(1)K	0.4439	1.06576	1.86587	1.80467	0.155521	0.108175
map00190 Oxidative phosphorylation	7.33456e-06	1.69	A0A5G2REY8	191	K	7.881	0.00251978	Up	Ubiquinol-cytochrome c reductase core protein 2 OS=Sus scrofa OX=9823 GN=UQCRC2 PE=1 SV=1	UQCRC2	K00415	1	3.82394e-18	203.77	4	IGK(1)VTPDQLHYYVQNHFTSAR	-0.04855	1.43907	2.80212	1.08317	0.224176	0.259794	0.191659
map00190 Oxidative phosphorylation	7.33456e-06	1.69	A0A5G2REY8	84	K	7.252	0.000359413	Up	Ubiquinol-cytochrome c reductase core protein 2 OS=Sus scrofa OX=9823 GN=UQCRC2 PE=1 SV=1	UQCRC2	K00415	1	3.84162e-10	237.68	3	LASSLTTK(1)GASSFK	-0.077168	1.47427	2.09523	1.70337	0.308182	0.232419	0.186528
map00190 Oxidative phosphorylation	7.33456e-06	1.69	A0A5G2REY8	351	K	7.557	9.34873e-05	Up	Ubiquinol-cytochrome c reductase core protein 2 OS=Sus scrofa OX=9823 GN=UQCRC2 PE=1 SV=1	UQCRC2	K00415	1	7.23161e-75	344.04	2	SAYDQVK(1)TIAQGNLSNTDVQAAK	-0.095016	1.50747	1.72634	2.065	0.263582	0.195089	0.242527
map00190 Oxidative phosphorylation	7.33456e-06	1.69	A0A5G2REY8	367	K	5.292	0.00261014	Up	Ubiquinol-cytochrome c reductase core protein 2 OS=Sus scrofa OX=9823 GN=UQCRC2 PE=1 SV=1	UQCRC2	K00415	1	9.01682e-34	283.82	2	TIAQGNLSNTDVQAAK(1)NK	0.85599	1.20542	1.38676	1.84845	0.30638		0.252991
map00190 Oxidative phosphorylation	7.33456e-06	1.69	Q95339	48	K	3.421	0.0443506	Up	ATP synthase subunit f, mitochondrial OS=Sus scrofa OX=9823 GN=ATP5MF PE=1 SV=4	ATP5MF	K02130	1	0.00198235	126.28	2	YYNK(1)YVNVK	0.069426		1.14579	2.33014	0.707356	0.375224	0.441488
map00190 Oxidative phosphorylation	7.33456e-06	1.69	A1XQT2	8	K	7.325	0.00145044	Up	Cytochrome c oxidase subunit 6C OS=Sus scrofa OX=9823 GN=COX6C PE=3 SV=1	COX6C	K02268	1	1.70046e-13	244.63	2	ATSSLTK(1)PQMR	0.7064	1.47579	1.58129	2.22216	0.357337	0.18913	0.174287
map00190 Oxidative phosphorylation	7.33456e-06	1.69	A1XQT2	48	K	3.471	0.00816033	Up	Cytochrome c oxidase subunit 6C OS=Sus scrofa OX=9823 GN=COX6C PE=3 SV=1	COX6C	K02268	1	0.00948254	109.36	2	K(1)AYADFYR	0.43489	1.03308	1.41792	2.20694	0.458077	0.526534	0.357451
map00190 Oxidative phosphorylation	7.33456e-06	1.69	F1RGE3	98	K	41.585	0.000372763	Up	NADH dehydrogenase [ubiquinone] 1 alpha subcomplex subunit 2 OS=Sus scrofa OX=9823 GN=NDUFA2 PE=1 SV=1	NDUFA2	K03946	1	0.00965002	88.181	2	TLENVLSGK(1)A	0.5505	1.55154	1.67862	1.69095		0.02882	0.0500728
map00190 Oxidative phosphorylation	7.33456e-06	1.69	F1RGE3	75	K	14.12	0.00366249	Up	NADH dehydrogenase [ubiquinone] 1 alpha subcomplex subunit 2 OS=Sus scrofa OX=9823 GN=NDUFA2 PE=1 SV=1	NDUFA2	K03946	1	3.20623e-143	427.45	2	YAFGQEK(1)NVSLNNFSADQVTR	-0.33853	2.974	1.82453	0.804646	0.170317	0.13145	0.0950633
map00190 Oxidative phosphorylation	7.33456e-06	1.69	F1RI18	33	K	7.43	0.00277505	Up	Complex III subunit 8 OS=Sus scrofa OX=9823 GN=UQCRQ PE=1 SV=1	UQCRQ	K00418	1	2.74976e-07	180.48	3	AFPHYFTK(1)GIPNVLR	0.81722	1.83277	2.1853	1.27022	0.132438	0.255611	0.323663
map00190 Oxidative phosphorylation	7.33456e-06	1.69	F1RNZ1	122	K	14.833	0.00267153	Up	Rieske domain-containing protein OS=Sus scrofa OX=9823 GN=UQCRFS1 PE=1 SV=2	UQCRFS1	K00411	1	1.2697e-37	312.95	2	RAEVLDSTK(1)SSK	-0.28516	1.18326	1.71738	2.72041	0.206607	0.0643546	0.107992
map00190 Oxidative phosphorylation	7.33456e-06	1.69	F1RNZ1	184	K	4.07	0.0162924	Up	Rieske domain-containing protein OS=Sus scrofa OX=9823 GN=UQCRFS1 PE=1 SV=2	UQCRFS1	K00411	1	0.00494261	103.69	2	LSDIPEGK(1)NMAFK	1.9926	1.1273	1.32219	2.36711	0.626361	0.247737	0.309303
map00190 Oxidative phosphorylation	7.33456e-06	1.69	F1RVN1	64	K	22.816	0.00311879	Up	NADH dehydrogenase [ubiquinone] flavoprotein 1, mitochondrial OS=Sus scrofa OX=9823 GN=NDUFV1 PE=1 SV=1	NDUFV1	K03942	1	0.0256986	107.32	2	GDWYK(1)TK	-1.2543	1.36621	1.5577	1.93413	0.101496		0.0404539
map00190 Oxidative phosphorylation	7.33456e-06	1.69	F1RVN1	81	K	18.898	0.000784892	Up	NADH dehydrogenase [ubiquinone] flavoprotein 1, mitochondrial OS=Sus scrofa OX=9823 GN=NDUFV1 PE=1 SV=1	NDUFV1	K03942	1	5.00855e-11	228.83	2	GPDWILGEVK(1)TSGLR	-0.77134	1.65934	1.45528	2.58386	0.159254	0.0778795	0.0644009
map00190 Oxidative phosphorylation	7.33456e-06	1.69	F1RVN1	36	K	9.019	0.000805982	Up	NADH dehydrogenase [ubiquinone] flavoprotein 1, mitochondrial OS=Sus scrofa OX=9823 GN=NDUFV1 PE=1 SV=1	NDUFV1	K03942	1	0.00052747	133.23	2	TSFGSLK(1)DEDR	1.067	1.3623	2.21696	1.8219	0.281623	0.171924	0.145295
map00190 Oxidative phosphorylation	7.33456e-06	1.69	F1RVN1	375	K	33.647	0.000165408	Up	NADH dehydrogenase [ubiquinone] flavoprotein 1, mitochondrial OS=Sus scrofa OX=9823 GN=NDUFV1 PE=1 SV=1	NDUFV1	K03942	1	3.36773e-55	329.82	3	LIEFYK(1)HESCGQCTPCR	0.42827	1.4877	1.58174	2.75739	0.0779735	0.0472453	0.0479577
map00190 Oxidative phosphorylation	7.33456e-06	1.69	F1RVN1	104	K	6.803	0.000204978	Up	NADH dehydrogenase [ubiquinone] flavoprotein 1, mitochondrial OS=Sus scrofa OX=9823 GN=NDUFV1 PE=1 SV=1	NDUFV1	K03942	1	0.00127112	106.54	3	WSFMNK(1)PSDGRPK	1.0996	1.64667	1.86074	1.72364	0.333511	0.228345	0.207101
map00190 Oxidative phosphorylation	7.33456e-06	1.69	F1S031	107	K	61.299	0.00288599	Up	NADH dehydrogenase [ubiquinone] iron-sulfur protein 6, mitochondrial OS=Sus scrofa OX=9823 GN=NDUFS6 PE=1 SV=1	NDUFS6	K03939	1	2.70981e-49	303.06	3	ETK(1)TGTCGYCGLQFR	-0.34597	1.59096	0.951411	2.40384	0.037162	0.0166309
map00190 Oxidative phosphorylation	7.33456e-06	1.69	F1SIS9	124	K	27.695	0.000396437	Up	NADH dehydrogenase [ubiquinone] 1 alpha subcomplex subunit 10, mitochondrial OS=Sus scrofa OX=9823 GN=NDUFA10 PE=1 SV=1	NDUFA10	K03954	1	2.74589e-14	251.24	3	FYDDPK(1)SNDGNSYR	0.13871	1.67405	1.59318	2.52368	0.110984	0.0495111	0.0486033
map00190 Oxidative phosphorylation	7.33456e-06	1.69	F1SIS9	244	K	20.685	0.000713844	Up	NADH dehydrogenase [ubiquinone] 1 alpha subcomplex subunit 10, mitochondrial OS=Sus scrofa OX=9823 GN=NDUFA10 PE=1 SV=1	NDUFA10	K03954	1	7.78155e-31	293.62	3	ITAAYLQDIENAYK(1)K	-0.052699	1.59876	1.56935	1.67578	0.0995225		0.0565937
map00190 Oxidative phosphorylation	7.33456e-06	1.69	F1SIS9	60	K	2.324	0.0352804	Up	NADH dehydrogenase [ubiquinone] 1 alpha subcomplex subunit 10, mitochondrial OS=Sus scrofa OX=9823 GN=NDUFA10 PE=1 SV=1	NDUFA10	K03954	0.980743	0.000320922	100.92	3	K(0.019)LTETSK(0.981)VITVDGNICSGK	-1.6881		1.61994	1.17658		0.608329	0.595147
map00190 Oxidative phosphorylation	7.33456e-06	1.69	F1SIS9	72	K	27.269	0.00058203	Up	NADH dehydrogenase [ubiquinone] 1 alpha subcomplex subunit 10, mitochondrial OS=Sus scrofa OX=9823 GN=NDUFA10 PE=1 SV=1	NDUFA10	K03954	1	3.84162e-10	237.68	2	VITVDGNICSGK(1)GR	0.39843	1.51946	1.57478	2.69352	0.114406	0.0499103	0.0479282
map00190 Oxidative phosphorylation	7.33456e-06	1.69	F1SJ34	115	K	4.68	0.00322664	Up	Cytochrome c oxidase polypeptide Va OS=Sus scrofa OX=9823 GN=COX5A PE=1 SV=1	COX5A	K02264	1	0.0256881	92.439	2	ILEVVK(1)DK	0.74	1.76892	1.91155	1.26317	0.487275	0.337288	0.231799
map00190 Oxidative phosphorylation	7.33456e-06	1.69	F1SLA0	186	K	10.948	0.00494248	Up	ATP synthase subunit beta OS=Sus scrofa OX=9823 GN=ATP5F1B PE=1 SV=3	ATP5F1B	K02133	1	3.48884e-73	349.36	2	DATSK(1)VALVYGQMNEPPGAR	0.1646	1.56605	1.59411	2.33768	0.31474	0.0705891	0.116829
map00190 Oxidative phosphorylation	7.33456e-06	1.69	F1SLA0	181	K	5.224	0.00736412	Up	ATP synthase subunit beta OS=Sus scrofa OX=9823 GN=ATP5F1B PE=1 SV=3	ATP5F1B	K02133	1	5.53867e-18	183.05	3	EGNDLYHEMIESGVINLK(1)DATSK	-1.6087	1.57695	2.30766		0.502214	0.309979	0.303192
map00190 Oxidative phosphorylation	7.33456e-06	1.69	F1SLA0	402	K	2.794	0.0106685	Up	ATP synthase subunit beta OS=Sus scrofa OX=9823 GN=ATP5F1B PE=1 SV=3	ATP5F1B	K02133	1	0.00100762	75.773	3	FLSQPFQVAEVFTGHLGK(1)LVPLK	0.25155	1.15023	1.6496	1.23687		0.41109	0.552206
map00190 Oxidative phosphorylation	7.33456e-06	1.69	F1SLA0	123	K	7.405	0.00970909	Up	ATP synthase subunit beta OS=Sus scrofa OX=9823 GN=ATP5F1B PE=1 SV=3	ATP5F1B	K02133	1	0.000997598	119.53	2	GGK(1)IGLFGGAGVGK	-0.12943	1.31266	1.13613	2.83733	0.404547	0.133587	0.175749
map00190 Oxidative phosphorylation	7.33456e-06	1.69	F1SLA0	120	K	12.981	5.09182e-05	Up	ATP synthase subunit beta OS=Sus scrofa OX=9823 GN=ATP5F1B PE=1 SV=3	ATP5F1B	K02133	1	0.00154021	121.83	3	VVDLLAPYAK(1)GGK	-0.78541	1.88431	1.51837	2.16815	0.170641	0.129466	0.12906
map00190 Oxidative phosphorylation	7.33456e-06	1.69	F1SLR1	239	K	13.683	0.0109865	Up	Complex I-19kD OS=Sus scrofa OX=9823 GN=NDUFA8 PE=1 SV=3	NDUFA8	K03952	0.999963	2.29389e-16	183.01	3	ARPEPNPEAEGDLKPAK(1)HGSR	0.075462	1.35216	1.52998	1.88556	0.182057		0.0502371
map00190 Oxidative phosphorylation	7.33456e-06	1.69	F1SLR1	209	K	9.811	0.00308801	Up	Complex I-19kD OS=Sus scrofa OX=9823 GN=NDUFA8 PE=1 SV=3	NDUFA8	K03952	1	5.84451e-07	151.48	3	VK(1)TDRPLPENPYHSR	-0.079848	1.53857	1.34333	2.56312	0.306753	0.137635	0.110584
map00190 Oxidative phosphorylation	7.33456e-06	1.69	F1SQP4	107	K	5.748	0.00259272	Up	NADH dehydrogenase [ubiquinone] 1 alpha subcomplex subunit 12 OS=Sus scrofa OX=9823 GN=NDUFA12 PE=1 SV=2	NDUFA12	K11352	1	0.0142063	73.208	3	K(1)YIWTNHK	0.022908	1.25633	1.58592	1.6381	0.313003		0.206637
map00190 Oxidative phosphorylation	7.33456e-06	1.69	F1SQP4	101	K	3.83	0.00581826	Up	NADH dehydrogenase [ubiquinone] 1 alpha subcomplex subunit 12 OS=Sus scrofa OX=9823 GN=NDUFA12 PE=1 SV=2	NDUFA12	K11352	1	0.0105613	60.949	3	WLHCMTDDPPTTK(1)PPTAR	0.11712	1.05214	1.51736	1.68917	0.356313		0.38502
map00190 Oxidative phosphorylation	7.33456e-06	1.69	F1SQP4	53	K	6.043	0.0003397	Up	NADH dehydrogenase [ubiquinone] 1 alpha subcomplex subunit 12 OS=Sus scrofa OX=9823 GN=NDUFA12 PE=1 SV=2	NDUFA12	K11352	1	0.00025191	182.4	2	YYEDNK(1)QFFGR	-0.35974	1.50121	1.48325	2.16368	0.339903	0.265617	0.246344
map00190 Oxidative phosphorylation	7.33456e-06	1.69	F1SV23	8	K	4.963	0.00468513	Up	Complex I-15 kDa OS=Sus scrofa OX=9823 GN=NDUFS5 PE=1 SV=1	NDUFS5	K03938	1	0.00116143	158.08	2	PFFDVQK(1)R	0.51519	1.65834	1.4098	1.92558	0.539044	0.24416	0.223073
map00190 Oxidative phosphorylation	7.33456e-06	1.69	F1SV23	101	K	3.989	0.00787045	Up	Complex I-15 kDa OS=Sus scrofa OX=9823 GN=NDUFS5 PE=1 SV=1	NDUFS5	K03938	1	0.0293994	54.281	3	YTPPPHHLGK(1)EDPRP	0.5806	1.52154	1.12281	2.15311	0.504294	0.443686	0.254558
map00190 Oxidative phosphorylation	7.33456e-06	1.69	I3LDC1	123	K	8.365	0.00179527	Up	Succinate dehydrogenase [ubiquinone] iron-sulfur subunit, mitochondrial OS=Sus scrofa OX=9823 GN=SDHB PE=1 SV=1	SDHB	K00235	1	0.00031718	171.67	3	RIDTNLNK(1)VSK	0.085047	1.53883	1.38515	2.43532	0.321014	0.167145	0.152548
map00190 Oxidative phosphorylation	7.33456e-06	1.69	I3LDC1	80	K	7.93	0.00197892	Up	Succinate dehydrogenase [ubiquinone] iron-sulfur subunit, mitochondrial OS=Sus scrofa OX=9823 GN=SDHB PE=1 SV=1	SDHB	K00235	1	2.26785e-08	221.59	3	IK(1)NEIDSTLTFR	-0.36253	1.6269	1.37465	2.32652	0.33147	0.19973	0.140729
map00190 Oxidative phosphorylation	7.33456e-06	1.69	I3LER5	29	K	48.469	0.00119823	Up	Cytochrome c oxidase subunit 4 OS=Sus scrofa OX=9823 GN=COX4I1 PE=1 SV=2	COX4I1	K02263	1	1.39427e-138	419	2	AHGSVVK(1)SEDYALPVYVDR	0.40325	1.70165	2.14573	2.03134	0.0833415	0.0211033	0.0168426
map00190 Oxidative phosphorylation	7.33456e-06	1.69	I3LER5	53	K	51.392	5.31739e-05	Up	Cytochrome c oxidase subunit 4 OS=Sus scrofa OX=9823 GN=COX4I1 PE=1 SV=2	COX4I1	K02263	1	4.69014e-138	413.77	3	RDYPLPDVAHVK(1)NLSASQK	0.43057	2.37695	1.74451	1.76401	0.0435327	0.0251389	0.0458507
map00190 Oxidative phosphorylation	7.33456e-06	1.69	I3LER5	67	K	15.169	0.000260437	Up	Cytochrome c oxidase subunit 4 OS=Sus scrofa OX=9823 GN=COX4I1 PE=1 SV=2	COX4I1	K02263	1	4.32855e-05	169.82	2	EK(1)ASWSSLSMDEK	-0.28379	2.05472	2.07852	1.49568	0.176294	0.0953942	0.099385
map00190 Oxidative phosphorylation	7.33456e-06	1.69	I3LFE8	284	K	37.012	0.000486248	Up	Inorganic diphosphatase OS=Sus scrofa OX=9823 GN=PPA2 PE=1 SV=2	PPA2	K01507	1	0.000131637	150.06	2	STHECWK(1)SLLMK	-0.22573	1.36158	2.00573	2.47484	0.0874248	0.0321314	0.0382878
map00190 Oxidative phosphorylation	7.33456e-06	1.69	I3LFE8	331	K	3.797	0.0438561	Up	Inorganic diphosphatase OS=Sus scrofa OX=9823 GN=PPA2 PE=1 SV=2	PPA2	K01507	1	5.15184e-05	134.21	3	GSK(1)EEDQVWHFLGK	0.46392	0.981532	2.03053	1.24112	0.515321	0.231503
map00190 Oxidative phosphorylation	7.33456e-06	1.69	I3LFE8	267	K	12.5	0.00206128	Up	Inorganic diphosphatase OS=Sus scrofa OX=9823 GN=PPA2 PE=1 SV=2	PPA2	K01507	1	2.93925e-07	145.05	3	IPEGKPENQFAFNGEFK(1)NK	0.2074	2.15799	1.5583	1.83928	0.252067	0.0730814	0.119286
map00190 Oxidative phosphorylation	7.33456e-06	1.69	I3LFE8	269	K	8.17	0.000198146	Up	Inorganic diphosphatase OS=Sus scrofa OX=9823 GN=PPA2 PE=1 SV=2	PPA2	K01507	1	0.0103435	93.649	2	NK(1)AFALEVIK	-0.27498	1.84841	1.51504	1.98225	0.253703	0.238543	0.162063
map00190 Oxidative phosphorylation	7.33456e-06	1.69	K7GR43	64	K	6.821	0.0124453	Up	Complex I-MWFE OS=Sus scrofa OX=9823 GN=NDUFA1 PE=1 SV=2	NDUFA1	K03945	1	0.00416298	105.4	2	YHVTK(1)GLENID	0.078622	1.01369	1.35238	2.86678	0.376936	0.261746	0.12846
map00190 Oxidative phosphorylation	7.33456e-06	1.69	K7GS22	106	K	4.456	0.00603714	Up	ATP synthase subunit epsilon, mitochondrial (Fragment)(predicted) OS=Sus scrofa OX=9823 GN=ATP5F1E PE=1 SV=1	ATP5F1E	K02135	1	0.000311566	167.23	2	YSQICAK(1)AVR	0.38176	1.66861	1.89084	1.34084	0.585443	0.272829	0.24144
map00190 Oxidative phosphorylation	7.33456e-06	1.69	K7GSE5	163	K	19.269	0.00053533	Up	Complex I-B22 OS=Sus scrofa OX=9823 GN=NDUFB9 PE=1 SV=2	NDUFB9	K03965	1	0.000254554	153.78	2	AMYPDYFAK(1)R	0.36451	1.31512	1.86854	2.52031	0.143606	0.0666349	0.0857823
map00190 Oxidative phosphorylation	7.33456e-06	1.69	Q35914	46	K	52.17	0.000217935	Up	ATP synthase protein 8 OS=Sus scrofa OX=9823 GN=MT-ATP8 PE=1 SV=2	MT-ATP8	K02125	1	9.94447e-05	134.49	3	TQK(1)HSTPWEMK	-0.67298	1.64019	2.11007	2.1369	0.0625158	0.0237919	0.0265368
map00190 Oxidative phosphorylation	7.33456e-06	1.69	Q5S3G4	74	K	7.268	0.0014986	Up	Cytochrome c oxidase subunit 5B, mitochondrial OS=Sus scrofa OX=9823 GN=COX5B PE=2 SV=1	COX5B	K02265	1	2.17713e-13	220.21	3	AASGTK(1)EDPNLVPSITNK	0.15485	1.3946	1.75735	2.12236	0.333291	0.241888	0.150505
map00190 Oxidative phosphorylation	7.33456e-06	1.69	Q5S3G4	86	K	5.444	0.00289555	Up	Cytochrome c oxidase subunit 5B, mitochondrial OS=Sus scrofa OX=9823 GN=COX5B PE=2 SV=1	COX5B	K02265	1	4.07274e-05	154.15	2	EDPNLVPSITNK(1)R	0.15164	1.42037	1.77895	1.86961	0.463248	0.19139	0.276426
map00190 Oxidative phosphorylation	7.33456e-06	1.69	Q5S3G4	121	K	2.951	0.00836663	Up	Cytochrome c oxidase subunit 5B, mitochondrial OS=Sus scrofa OX=9823 GN=COX5B PE=2 SV=1	COX5B	K02265	1	2.60102e-15	229.02	3	CPSCGTHYK(1)LVSHQLAH	-1.3063	1.27093	2.02523	1.18538	0.629776	0.506028	0.382653
map00190 Oxidative phosphorylation	7.33456e-06	1.69	Q5S3G4	57	K	6.556	0.00645563	Up	Cytochrome c oxidase subunit 5B, mitochondrial OS=Sus scrofa OX=9823 GN=COX5B PE=2 SV=1	COX5B	K02265	1	0.000247349	182.54	2	K(1)GLDPYNILAPK	0.34386	1.46868	1.74772	1.32211	0.309129	0.152358
map00220 Arginine biosynthesis	0.492932	1.3	A0A287AFJ1	427	K	9.92	0.0027271	Up	Glutamine synthetase OS=Sus scrofa OX=9823 GN=GLUL PE=1 SV=1	GLUL	K01915	1	3.95046e-05	163.65	2	AYDPK(1)GGLDNAR	0.34881	2.00942	1.28014	2.161	0.307847	0.107117	0.13447
map00220 Arginine biosynthesis	0.492932	1.3	A0A287AFJ1	59	K	7.425	0.00135029	Up	Glutamine synthetase OS=Sus scrofa OX=9823 GN=GLUL PE=1 SV=1	GLUL	K01915	1	9.68841e-06	138.05	3	IK(1)SLTHQPSYSCSSR	-0.35705	1.69603	1.21179	2.37999	0.31582	0.190291	0.206072
map00220 Arginine biosynthesis	0.492932	1.3	A0A287AFJ1	395	K	9.373	0.00660517	Up	Glutamine synthetase OS=Sus scrofa OX=9823 GN=GLUL PE=1 SV=1	GLUL	K01915	1	1.58707e-18	214.69	3	PIPGNWNGAGCHTNFSTK(1)AMR	-0.068915	1.72254	1.41828	2.28075	0.38077	0.0965322	0.101135
map00220 Arginine biosynthesis	0.492932	1.3	P00506	90	K	27.053	0.000878985	Up	Aspartate aminotransferase, mitochondrial OS=Sus scrofa OX=9823 GN=GOT2 PE=1 SV=2	GOT2	K14455	1	1.28758e-38	315.59	2	K(1)AEAQIAAK(1)NLDK	-0.28283	1.73603	1.80514	2.24496	0.126186	0.0526204	0.0350725
map00220 Arginine biosynthesis	0.492932	1.3	P00506	122	K	4.877	0.0126835	Up	Aspartate aminotransferase, mitochondrial OS=Sus scrofa OX=9823 GN=GOT2 PE=1 SV=2	GOT2	K14455	1	4.4751e-100	385.31	2	ASAELALGENNEVLK(1)SGR	-0.26663	1.24871	1.6234	2.1069	0.602666	0.178371	0.239957
map00220 Arginine biosynthesis	0.492932	1.3	P00506	73	K	4.807	0.0021095	Up	Aspartate aminotransferase, mitochondrial OS=Sus scrofa OX=9823 GN=GOT2 PE=1 SV=2	GOT2	K14455	1	0.00311676	112.13	2	DDNGK(1)PYVLPSVR	-0.24733	1.52005	1.67046	1.77625	0.371542	0.21292	0.448776
map00220 Arginine biosynthesis	0.492932	1.3	P00506	159	K	27.652	0.00017082	Up	Aspartate aminotransferase, mitochondrial OS=Sus scrofa OX=9823 GN=GOT2 PE=1 SV=2	GOT2	K14455	1	2.28188e-25	259.7	2	DVFLPK(1)PSWGNHTPIFR	-0.14649	2.4752	1.57385	1.74154	0.08588	0.0787644	0.0447638
map00220 Arginine biosynthesis	0.492932	1.3	P00506	404	K	13.671	0.00011086	Up	Aspartate aminotransferase, mitochondrial OS=Sus scrofa OX=9823 GN=GOT2 PE=1 SV=2	GOT2	K14455	1	3.9735e-05	205.09	2	EFSIYMTK(1)DGR	-0.40074	1.99297	1.75064	1.84742	0.185849	0.11365	0.10947
map00220 Arginine biosynthesis	0.492932	1.3	P00506	234	K	11.05	0.000617036	Up	Aspartate aminotransferase, mitochondrial OS=Sus scrofa OX=9823 GN=GOT2 PE=1 SV=2	GOT2	K14455	1	1.70945e-06	93.437	5	IPAQSVILLHACAHNPTGVDPRPEQWK(1)EMATLVK(1)K	-0.28561	1.64881	2.15028	1.70299	0.247217	0.139063	0.111637
map00220 Arginine biosynthesis	0.492932	1.3	P00506	279	K	32.497	0.000531278	Up	Aspartate aminotransferase, mitochondrial OS=Sus scrofa OX=9823 GN=GOT2 PE=1 SV=2	GOT2	K14455	1	3.08668e-46	282.05	3	HFIEQGINVCLCQSYAK(1)NMGLYGER	-0.21123	1.75921	1.28562	1.85466		0.0609308	0.0395821
map00220 Arginine biosynthesis	0.492932	1.3	P00506	345	K	8.513	0.00572542	Up	Aspartate aminotransferase, mitochondrial OS=Sus scrofa OX=9823 GN=GOT2 PE=1 SV=2	GOT2	K14455	1	8.52894e-05	179.19	3	QQWLQEVK(1)GMADR	-0.49791	1.41017	1.98195	1.24477	0.239821		0.123294
map00220 Arginine biosynthesis	0.492932	1.3	P00506	309	K	10.969	0.000213193	Up	Aspartate aminotransferase, mitochondrial OS=Sus scrofa OX=9823 GN=GOT2 PE=1 SV=2	GOT2	K14455	1	1.53243e-05	207.29	2	VESQLK(1)ILIR	0.4788	1.91308	1.91324	1.67237	0.228165	0.121864	0.151283
map00220 Arginine biosynthesis	0.492932	1.3	P00506	296	K	13.166	0.000619756	Up	Aspartate aminotransferase, mitochondrial OS=Sus scrofa OX=9823 GN=GOT2 PE=1 SV=2	GOT2	K14455	1	4.3194e-07	196.67	3	VGAFTVVCK(1)DAEEAK(1)R	0.22048	1.47011	1.86087	2.24548	0.212591	0.0968385	0.114108
map00220 Arginine biosynthesis	0.492932	1.3	P00506	185	K	7.392	0.000898733	Up	Aspartate aminotransferase, mitochondrial OS=Sus scrofa OX=9823 GN=GOT2 PE=1 SV=2	GOT2	K14455	1	1.17093e-17	213.49	2	YYDPK(1)TCGFDFTGALEDISK	1.4659	1.89835	1.72845	1.65824	0.351514	0.164186	0.199257
map00220 Arginine biosynthesis	0.492932	1.3	A0A5G2R3R8	164	K	22.539	0.000332193	Up	Glutamate dehydrogenase OS=Sus scrofa OX=9823 GN=GLUD1 PE=1 SV=1	GLUD1	K00261	1	0.00228414	117.25	3	INPK(1)NYTDNELEK	0.47896	2.0084	1.88074	1.85596	0.12902	0.0493664	0.0765088
map00220 Arginine biosynthesis	0.492932	1.3	A0A5G2R3R8	363	K	35.564	0.00069334	Up	Glutamate dehydrogenase OS=Sus scrofa OX=9823 GN=GLUD1 PE=1 SV=1	GLUD1	K00261	1	0.000414811	150.17	2	QLTK(1)SNAPR	0.073608	1.27163	1.5177	2.11867		0.0550769	0.0369257
map00220 Arginine biosynthesis	0.492932	1.3	F1SA26	66	K	8.108	0.000895461	Up	Arginase OS=Sus scrofa OX=9823 GN=ARG2 PE=3 SV=1	ARG2	K01476	1	2.47601e-08	157.73	3	LSDLGCHLK(1)DFGDLSFTPVPK	0.13971	1.46262	1.89479	1.26271		0.195978	0.183907
map00250 Alanine, aspartate and glutamate metabolism	0.263852	1.4	A0A287AFJ1	427	K	9.92	0.0027271	Up	Glutamine synthetase OS=Sus scrofa OX=9823 GN=GLUL PE=1 SV=1	GLUL	K01915	1	3.95046e-05	163.65	2	AYDPK(1)GGLDNAR	0.34881	2.00942	1.28014	2.161	0.307847	0.107117	0.13447
map00250 Alanine, aspartate and glutamate metabolism	0.263852	1.4	A0A287AFJ1	59	K	7.425	0.00135029	Up	Glutamine synthetase OS=Sus scrofa OX=9823 GN=GLUL PE=1 SV=1	GLUL	K01915	1	9.68841e-06	138.05	3	IK(1)SLTHQPSYSCSSR	-0.35705	1.69603	1.21179	2.37999	0.31582	0.190291	0.206072
map00250 Alanine, aspartate and glutamate metabolism	0.263852	1.4	A0A287AFJ1	395	K	9.373	0.00660517	Up	Glutamine synthetase OS=Sus scrofa OX=9823 GN=GLUL PE=1 SV=1	GLUL	K01915	1	1.58707e-18	214.69	3	PIPGNWNGAGCHTNFSTK(1)AMR	-0.068915	1.72254	1.41828	2.28075	0.38077	0.0965322	0.101135
map00250 Alanine, aspartate and glutamate metabolism	0.263852	1.4	A0A287BPT0	195	K	2.4	0.0233365	Up	Amine oxidase OS=Sus scrofa OX=9823 GN=IL4I1 PE=1 SV=1	IL4I1	K03334	1	1.68098e-05	214.05	2	ALEDLK(1)TLGCR	0.51981	1.20217	1.15474	1.87817	0.831458	0.485994	0.447469
map00250 Alanine, aspartate and glutamate metabolism	0.263852	1.4	A0A287BPT0	354	K	10.856	0.00445141	Up	Amine oxidase OS=Sus scrofa OX=9823 GN=IL4I1 PE=1 SV=1	IL4I1	K03334	1	2.01115e-06	149.69	2	ALHYLPATK(1)VFLSFR	0.0098332	1.52372	1.25617	2.71404	0.183979	0.0760498	0.24604
map00250 Alanine, aspartate and glutamate metabolism	0.263852	1.4	A0A287BPT0	500	K	5.137	0.0203042	Up	Amine oxidase OS=Sus scrofa OX=9823 GN=IL4I1 PE=1 SV=1	IL4I1	K03334	1	2.50728e-38	263.71	3	IYFAGEHTAFPHGWVETAVK(1)SALR	0.26822	1.1991	1.04709	2.77616	0.513719	0.291314	0.172616
map00250 Alanine, aspartate and glutamate metabolism	0.263852	1.4	A0A287BPT0	442	K	6.095	0.00897975	Up	Amine oxidase OS=Sus scrofa OX=9823 GN=IL4I1 PE=1 SV=1	IL4I1	K03334	1	0.000402054	190.51	2	LWDGSGVIK(1)R	-0.021554	1.68127	1.17312	2.29994	0.487875	0.205652	0.152136
map00250 Alanine, aspartate and glutamate metabolism	0.263852	1.4	F1RPW8	271	K	13.256	0.0045557	Up	Asparaginase-like protein 1 OS=Sus scrofa OX=9823 GN=ASRGL1 PE=1 SV=3	ASRGL1	K13051	1	1.10699e-10	192.68	3	GVGGVIVVNK(1)AGDWAVK	0.26008	1.28883	1.0532	2.41855	0.128251	0.111168
map00250 Alanine, aspartate and glutamate metabolism	0.263852	1.4	F1RPW8	112	K	44.846	0.000417489	Up	Asparaginase-like protein 1 OS=Sus scrofa OX=9823 GN=ASRGL1 PE=1 SV=3	ASRGL1	K13051	1	4.09075e-68	338.23	3	LVMEK(1)THHCFLTDQGAAK	-0.13106	1.2552	2.06775	2.54617	0.0701378	0.0337045	0.0270294
map00250 Alanine, aspartate and glutamate metabolism	0.263852	1.4	F1RPW8	261	K	8.838	0.0094786	Up	Asparaginase-like protein 1 OS=Sus scrofa OX=9823 GN=ASRGL1 PE=1 SV=3	ASRGL1	K13051	1	0.00430827	108.26	2	VK(1)GVGGVIVVNK	-0.53896	1.19562	1.31602	2.13766	0.240696	0.110001
map00250 Alanine, aspartate and glutamate metabolism	0.263852	1.4	A0A5G2QIN8	319	K	4.487	0.0246806	Up	Aldehyde dehydrogenase 5 family member A1 OS=Sus scrofa OX=9823 GN=ALDH5A1 PE=1 SV=1	ALDH5A1	K00139	1	0.000868422	136.27	3	GIHDSFVK(1)K	-0.54088	2.18467	1.08874	1.63303	0.168477	0.68968	0.235411
map00250 Alanine, aspartate and glutamate metabolism	0.263852	1.4	A0A5G2QIN8	355	K	10.103	0.000216434	Up	Aldehyde dehydrogenase 5 family member A1 OS=Sus scrofa OX=9823 GN=ALDH5A1 PE=1 SV=1	ALDH5A1	K00139	1	0.000385609	124.6	2	VEK(1)HVIDAISK	-0.22712	1.99215	1.67125	1.79619	0.242916	0.164325	0.133176
map00250 Alanine, aspartate and glutamate metabolism	0.263852	1.4	P00506	90	K	27.053	0.000878985	Up	Aspartate aminotransferase, mitochondrial OS=Sus scrofa OX=9823 GN=GOT2 PE=1 SV=2	GOT2	K14455	1	1.28758e-38	315.59	2	K(1)AEAQIAAK(1)NLDK	-0.28283	1.73603	1.80514	2.24496	0.126186	0.0526204	0.0350725
map00250 Alanine, aspartate and glutamate metabolism	0.263852	1.4	P00506	122	K	4.877	0.0126835	Up	Aspartate aminotransferase, mitochondrial OS=Sus scrofa OX=9823 GN=GOT2 PE=1 SV=2	GOT2	K14455	1	4.4751e-100	385.31	2	ASAELALGENNEVLK(1)SGR	-0.26663	1.24871	1.6234	2.1069	0.602666	0.178371	0.239957
map00250 Alanine, aspartate and glutamate metabolism	0.263852	1.4	P00506	73	K	4.807	0.0021095	Up	Aspartate aminotransferase, mitochondrial OS=Sus scrofa OX=9823 GN=GOT2 PE=1 SV=2	GOT2	K14455	1	0.00311676	112.13	2	DDNGK(1)PYVLPSVR	-0.24733	1.52005	1.67046	1.77625	0.371542	0.21292	0.448776
map00250 Alanine, aspartate and glutamate metabolism	0.263852	1.4	P00506	159	K	27.652	0.00017082	Up	Aspartate aminotransferase, mitochondrial OS=Sus scrofa OX=9823 GN=GOT2 PE=1 SV=2	GOT2	K14455	1	2.28188e-25	259.7	2	DVFLPK(1)PSWGNHTPIFR	-0.14649	2.4752	1.57385	1.74154	0.08588	0.0787644	0.0447638
map00250 Alanine, aspartate and glutamate metabolism	0.263852	1.4	P00506	404	K	13.671	0.00011086	Up	Aspartate aminotransferase, mitochondrial OS=Sus scrofa OX=9823 GN=GOT2 PE=1 SV=2	GOT2	K14455	1	3.9735e-05	205.09	2	EFSIYMTK(1)DGR	-0.40074	1.99297	1.75064	1.84742	0.185849	0.11365	0.10947
map00250 Alanine, aspartate and glutamate metabolism	0.263852	1.4	P00506	234	K	11.05	0.000617036	Up	Aspartate aminotransferase, mitochondrial OS=Sus scrofa OX=9823 GN=GOT2 PE=1 SV=2	GOT2	K14455	1	1.70945e-06	93.437	5	IPAQSVILLHACAHNPTGVDPRPEQWK(1)EMATLVK(1)K	-0.28561	1.64881	2.15028	1.70299	0.247217	0.139063	0.111637
map00250 Alanine, aspartate and glutamate metabolism	0.263852	1.4	P00506	279	K	32.497	0.000531278	Up	Aspartate aminotransferase, mitochondrial OS=Sus scrofa OX=9823 GN=GOT2 PE=1 SV=2	GOT2	K14455	1	3.08668e-46	282.05	3	HFIEQGINVCLCQSYAK(1)NMGLYGER	-0.21123	1.75921	1.28562	1.85466		0.0609308	0.0395821
map00250 Alanine, aspartate and glutamate metabolism	0.263852	1.4	P00506	345	K	8.513	0.00572542	Up	Aspartate aminotransferase, mitochondrial OS=Sus scrofa OX=9823 GN=GOT2 PE=1 SV=2	GOT2	K14455	1	8.52894e-05	179.19	3	QQWLQEVK(1)GMADR	-0.49791	1.41017	1.98195	1.24477	0.239821		0.123294
map00250 Alanine, aspartate and glutamate metabolism	0.263852	1.4	P00506	309	K	10.969	0.000213193	Up	Aspartate aminotransferase, mitochondrial OS=Sus scrofa OX=9823 GN=GOT2 PE=1 SV=2	GOT2	K14455	1	1.53243e-05	207.29	2	VESQLK(1)ILIR	0.4788	1.91308	1.91324	1.67237	0.228165	0.121864	0.151283
map00250 Alanine, aspartate and glutamate metabolism	0.263852	1.4	P00506	296	K	13.166	0.000619756	Up	Aspartate aminotransferase, mitochondrial OS=Sus scrofa OX=9823 GN=GOT2 PE=1 SV=2	GOT2	K14455	1	4.3194e-07	196.67	3	VGAFTVVCK(1)DAEEAK(1)R	0.22048	1.47011	1.86087	2.24548	0.212591	0.0968385	0.114108
map00250 Alanine, aspartate and glutamate metabolism	0.263852	1.4	P00506	185	K	7.392	0.000898733	Up	Aspartate aminotransferase, mitochondrial OS=Sus scrofa OX=9823 GN=GOT2 PE=1 SV=2	GOT2	K14455	1	1.17093e-17	213.49	2	YYDPK(1)TCGFDFTGALEDISK	1.4659	1.89835	1.72845	1.65824	0.351514	0.164186	0.199257
map00250 Alanine, aspartate and glutamate metabolism	0.263852	1.4	A0A5G2R3R8	164	K	22.539	0.000332193	Up	Glutamate dehydrogenase OS=Sus scrofa OX=9823 GN=GLUD1 PE=1 SV=1	GLUD1	K00261	1	0.00228414	117.25	3	INPK(1)NYTDNELEK	0.47896	2.0084	1.88074	1.85596	0.12902	0.0493664	0.0765088
map00250 Alanine, aspartate and glutamate metabolism	0.263852	1.4	A0A5G2R3R8	363	K	35.564	0.00069334	Up	Glutamate dehydrogenase OS=Sus scrofa OX=9823 GN=GLUD1 PE=1 SV=1	GLUD1	K00261	1	0.000414811	150.17	2	QLTK(1)SNAPR	0.073608	1.27163	1.5177	2.11867		0.0550769	0.0369257
map00250 Alanine, aspartate and glutamate metabolism	0.263852	1.4	I3LNB4	192	K	9.69	0.00855633	Up	Multifunctional fusion protein OS=Sus scrofa OX=9823 GN=ALDH4A1 PE=1 SV=3	ALDH4A1	K00294	1	3.92338e-05	180.61	2	RAEILAK(1)TMVGQGK	-0.60394	1.3299	1.42318	2.68566	0.354019	0.131491	0.0757495
map00250 Alanine, aspartate and glutamate metabolism	0.263852	1.4	I3LNB4	145	K	9.736	0.00128285	Up	Multifunctional fusion protein OS=Sus scrofa OX=9823 GN=ALDH4A1 PE=1 SV=3	ALDH4A1	K00294	1	9.39689e-05	200.11	3	VAK(1)FCYADK(1)ALLHR	-0.53984	1.29682	1.8763	2.26801	0.276073	0.125663	0.157128
map00250 Alanine, aspartate and glutamate metabolism	0.263852	1.4	I3LNB4	342	K	4.411	2.63564e-05	Up	Multifunctional fusion protein OS=Sus scrofa OX=9823 GN=ALDH4A1 PE=1 SV=3	ALDH4A1	K00294	1	2.85446e-05	138.77	3	HLWK(1)QVAQNLDHFR	1.0309	1.40632	1.46411	1.47304	0.315807	0.340721
map00250 Alanine, aspartate and glutamate metabolism	0.263852	1.4	I3LNB4	422	K	8.681	0.0110099	Up	Multifunctional fusion protein OS=Sus scrofa OX=9823 GN=ALDH4A1 PE=1 SV=3	ALDH4A1	K00294	1	1.71804e-07	155.22	2	IK(1)VGDPAEDFGTFFSAVIDAK	0.53449	1.24266	1.19122	2.20952	0.244668	0.111927
map00250 Alanine, aspartate and glutamate metabolism	0.263852	1.4	I3LNB4	448	K	11.509	0.000187342	Up	Multifunctional fusion protein OS=Sus scrofa OX=9823 GN=ALDH4A1 PE=1 SV=3	ALDH4A1	K00294	1	0.0095833	149.4	2	K(1)WLEHAR	-0.22059	1.61145	1.77872	2.13016	0.204722	0.115026	0.159919
map00250 Alanine, aspartate and glutamate metabolism	0.263852	1.4	I3LNB4	364	K	20.487	0.00352003	Up	Multifunctional fusion protein OS=Sus scrofa OX=9823 GN=ALDH4A1 PE=1 SV=3	ALDH4A1	K00294	1	5.2846e-07	144.27	4	LAGECGGK(1)NFHFVHR	0.31744	1.31589	1.04741	2.47913		0.0908397	0.0667358
map00250 Alanine, aspartate and glutamate metabolism	0.263852	1.4	I3LNB4	411	K	11.318	0.0277806	Up	Multifunctional fusion protein OS=Sus scrofa OX=9823 GN=ALDH4A1 PE=1 SV=3	ALDH4A1	K00294	1	2.97561e-05	152.04	2	LYVPGSLWPQIK(1)GR	-0.060728		1.74335	1.93192	0.227452		0.0972815
map00250 Alanine, aspartate and glutamate metabolism	0.263852	1.4	I3LNB4	139	K	15.295	0.000459346	Up	Multifunctional fusion protein OS=Sus scrofa OX=9823 GN=ALDH4A1 PE=1 SV=3	ALDH4A1	K00294	1	0.00170069	136.17	4	YQVSPFNHGHK(1)VAK(1)FCYADK	0.64028	1.31413	1.64291	1.83413	0.0902648		0.118564
map00250 Alanine, aspartate and glutamate metabolism	0.263852	1.4	I3LNB4	136	K	10.105	0.00733966	Up	Multifunctional fusion protein OS=Sus scrofa OX=9823 GN=ALDH4A1 PE=1 SV=3	ALDH4A1	K00294	1	0.000213983	119.39	4	YQVSPFNHGHK(1)VAK(1)FCYADK	0.64028	1.69171	1.72391	2.04406	0.0591214	0.143857	0.337339
map00280 Valine, leucine and isoleucine degradation	0.00142429	1.73	A0A287ADK3	409	K	17.969	0.0215392	Up	Aldehyde dehydrogenase (NAD(+)) OS=Sus scrofa OX=9823 GN=ALDH7A1 PE=1 SV=1	ALDH7A1	K14085	1	5.53261e-40	301.93	3	FK(1)NEDEVFAWNNEVK	-0.20014	1.56962	0.998956	2.25255	0.152374	0.0264957
map00280 Valine, leucine and isoleucine degradation	0.00142429	1.73	A0A287ADK3	322	K	11.332	0.000279857	Up	Aldehyde dehydrogenase (NAD(+)) OS=Sus scrofa OX=9823 GN=ALDH7A1 PE=1 SV=1	ALDH7A1	K14085	1	0.00984518	102.95	2	LTK(1)AYAQIR	-0.33877	1.5294	2.12202	1.86203	0.224637	0.125655	0.136265
map00280 Valine, leucine and isoleucine degradation	0.00142429	1.73	A0A5G2QFH7	687	K	5.067	0.00589336	Up	Dihydrolipoamide acetyltransferase component of pyruvate dehydrogenase complex OS=Sus scrofa OX=9823 GN=DBT PE=1 SV=1	DBT	K09699	1	0.000268764	101.64	4	GDVHK(1)AQIMNVSWSADHR	0.27852	1.71881	1.66683	1.62547	0.545719	0.261155	0.18202
map00280 Valine, leucine and isoleucine degradation	0.00142429	1.73	A0A287BG49	306	K	4.488	0.000917961	Up	Short-chain-specific acyl-CoA dehydrogenase, mitochondrial OS=Sus scrofa OX=9823 GN=ACADS PE=1 SV=1	ACADS	K00248	1	1.05069e-06	184.9	2	AFGVPLTK(1)LQGIQFK	0.43514	1.23489	1.93169	1.74005	0.440723	0.314058	0.338591
map00280 Valine, leucine and isoleucine degradation	0.00142429	1.73	A0A287BG49	262	K	4.285	0.00455088	Up	Short-chain-specific acyl-CoA dehydrogenase, mitochondrial OS=Sus scrofa OX=9823 GN=ACADS PE=1 SV=1	ACADS	K00248	1	3.87505e-06	127.05	3	ENLLGEPGMGFK(1)IAMQTLDMGR	-0.66191	1.29993	1.86584	1.161		0.325755	0.34748
map00280 Valine, leucine and isoleucine degradation	0.00142429	1.73	A0A287BG49	389	K	21.088	0.000102548	Up	Short-chain-specific acyl-CoA dehydrogenase, mitochondrial OS=Sus scrofa OX=9823 GN=ACADS PE=1 SV=1	ACADS	K00248	1	2.78967e-06	218.47	3	LVIAGHLLK(1)SYRS	-0.41221	2.50745	1.61607	1.60484	0.0999544	0.0686739	0.103011
map00280 Valine, leucine and isoleucine degradation	0.00142429	1.73	A0A287BG49	208	K	3.749	0.0205058	Up	Short-chain-specific acyl-CoA dehydrogenase, mitochondrial OS=Sus scrofa OX=9823 GN=ACADS PE=1 SV=1	ACADS	K00248	1	3.98706e-07	125.04	3	SLQNK(1)GISAFLVPMPTPGLTLGK	-0.1081	1.34448	1.75932	1.14127	0.501996	0.252937
map00280 Valine, leucine and isoleucine degradation	0.00142429	1.73	A0A287AA21	139	K	20.278	0.000317685	Up	Enoyl-CoA hydratase, mitochondrial OS=Sus scrofa OX=9823 GN=ECHS1 PE=1 SV=2	ECHS1	K07511	1	2.67594e-146	404.47	4	AFAAGADIK(1)EMQNQTFQDCYSGGFLSHWDHLSR	0.4262	2.63466		2.02096	0.096066	0.133847	0.11447
map00280 Valine, leucine and isoleucine degradation	0.00142429	1.73	A0A287AA21	320	K	6.846	0.0125963	Up	Enoyl-CoA hydratase, mitochondrial OS=Sus scrofa OX=9823 GN=ECHS1 PE=1 SV=2	ECHS1	K07511	1	0.00959304	88.364	2	EGMTAFVEK(1)R	0.70354	1.44063	1.29248	1.82318	0.319528	0.124176
map00280 Valine, leucine and isoleucine degradation	0.00142429	1.73	A0A287AA21	81	K	34.123	0.00143034	Up	Enoyl-CoA hydratase, mitochondrial OS=Sus scrofa OX=9823 GN=ECHS1 PE=1 SV=2	ECHS1	K07511	1	5.79872e-96	376.25	2	GK(1)SSNVGLIQLNRPK	0.042881	1.85701	1.5273	2.44486	0.109275	0.0233578	0.0381957
map00280 Valine, leucine and isoleucine degradation	0.00142429	1.73	A0A287AA21	94	K	3.783	0.0112545	Up	Enoyl-CoA hydratase, mitochondrial OS=Sus scrofa OX=9823 GN=ECHS1 PE=1 SV=2	ECHS1	K07511	1	0.000289903	179.21	2	PK(1)ALNALCK	-1.0226	1.47849	1.44979	1.81725	0.702539	0.28967	0.262259
map00280 Valine, leucine and isoleucine degradation	0.00142429	1.73	A0A287ANI6	48	K	6.106	0.00207926	Up	Hydroxymethylglutaryl-CoA lyase OS=Sus scrofa OX=9823 GN=HMGCL PE=1 SV=2	HMGCL	K01640	1	2.62413e-22	271.32	3	DGLQNEK(1)NIIPTPTK	-0.073686	2.60163	1.39746	1.15652	0.281633	0.293286	0.26947
map00280 Valine, leucine and isoleucine degradation	0.00142429	1.73	A0A287BPT0	195	K	2.4	0.0233365	Up	Amine oxidase OS=Sus scrofa OX=9823 GN=IL4I1 PE=1 SV=1	IL4I1	K03334	1	1.68098e-05	214.05	2	ALEDLK(1)TLGCR	0.51981	1.20217	1.15474	1.87817	0.831458	0.485994	0.447469
map00280 Valine, leucine and isoleucine degradation	0.00142429	1.73	A0A287BPT0	354	K	10.856	0.00445141	Up	Amine oxidase OS=Sus scrofa OX=9823 GN=IL4I1 PE=1 SV=1	IL4I1	K03334	1	2.01115e-06	149.69	2	ALHYLPATK(1)VFLSFR	0.0098332	1.52372	1.25617	2.71404	0.183979	0.0760498	0.24604
map00280 Valine, leucine and isoleucine degradation	0.00142429	1.73	A0A287BPT0	500	K	5.137	0.0203042	Up	Amine oxidase OS=Sus scrofa OX=9823 GN=IL4I1 PE=1 SV=1	IL4I1	K03334	1	2.50728e-38	263.71	3	IYFAGEHTAFPHGWVETAVK(1)SALR	0.26822	1.1991	1.04709	2.77616	0.513719	0.291314	0.172616
map00280 Valine, leucine and isoleucine degradation	0.00142429	1.73	A0A287BPT0	442	K	6.095	0.00897975	Up	Amine oxidase OS=Sus scrofa OX=9823 GN=IL4I1 PE=1 SV=1	IL4I1	K03334	1	0.000402054	190.51	2	LWDGSGVIK(1)R	-0.021554	1.68127	1.17312	2.29994	0.487875	0.205652	0.152136
map00280 Valine, leucine and isoleucine degradation	0.00142429	1.73	F1SED0	425	K	11.718	0.000265981	Up	Acyl-CoA dehydrogenase short/branched chain OS=Sus scrofa OX=9823 GN=ACADSB PE=1 SV=4	ACADSB	K09478	1	1.34896e-123	409.14	3	IGTIYEGTSNIQLNTIAK(1)NVSK	3.0881	2.04105	1.63397	1.8532	0.110133	0.21613	0.145512
map00280 Valine, leucine and isoleucine degradation	0.00142429	1.73	F1SK15	269	K	8.095	0.00138476	Up	Methylcrotonoyl-CoA carboxylase 2 OS=Sus scrofa OX=9823 GN=MCCC2 PE=1 SV=3	MCCC2	K01969	1	2.88828e-05	112.55	4	K(1)SGVSDYYALDDNHALHLVR	1.2163	1.19658	1.89434	1.52862	0.203764		0.176699
map00280 Valine, leucine and isoleucine degradation	0.00142429	1.73	A0A287B9G2	328	K	12.504	0.00205742	Up	3-hydroxyisobutyryl-CoA hydrolase, mitochondrial OS=Sus scrofa OX=9823 GN=HIBCH PE=1 SV=2	HIBCH	K05605	1	0.00375626	107.57	2	AVLIDK(1)DQNPK	-0.47927	1.47583	2.13269	1.1384		0.139291	0.113795
map00280 Valine, leucine and isoleucine degradation	0.00142429	1.73	A0A287BA08	602	K	24.896	0.00144884	Up	Methylmalonyl-CoA isomerase OS=Sus scrofa OX=9823 GN=MMUT PE=3 SV=1	MMUT	K01847	1	0.019907	92.187	2	EISFAIK(1)R	-0.42791	1.01745	1.87138	2.87947	0.116433	0.0444906	0.0707696
map00280 Valine, leucine and isoleucine degradation	0.00142429	1.73	A0A287BA08	343	K	33.07	8.34099e-05	Up	Methylmalonyl-CoA isomerase OS=Sus scrofa OX=9823 GN=MMUT PE=3 SV=1	MMUT	K01847	1	0.000984314	172.14	2	NSK(1)SLLLR	-0.53771	1.47697	2.12065	2.22627	0.0790856	0.0440465	0.0529748
map00280 Valine, leucine and isoleucine degradation	0.00142429	1.73	Q2XQV4	432	K	9.995	0.00100617	Up	Aldehyde dehydrogenase, mitochondrial OS=Sus scrofa OX=9823 GN=ALDH2 PE=2 SV=1	ALDH2	K00128	1	0.000171453	152.34	2	FK(1)TIEEVIGR	0.50264	1.99671	2.16627	1.29131	0.17112	0.119906	0.254688
map00280 Valine, leucine and isoleucine degradation	0.00142429	1.73	Q2XQV4	379	K	12.974	0.00838091	Up	Aldehyde dehydrogenase, mitochondrial OS=Sus scrofa OX=9823 GN=ALDH2 PE=2 SV=1	ALDH2	K00128	1	0.0325645	76.827	2	ILGYIK(1)SGK	-0.12652	1.15901	1.47018	2.12645	0.176825		0.0675384
map00280 Valine, leucine and isoleucine degradation	0.00142429	1.73	Q2XQV4	372	K	9.488	0.00431005	Up	Aldehyde dehydrogenase, mitochondrial OS=Sus scrofa OX=9823 GN=ALDH2 PE=2 SV=1	ALDH2	K00128	1	2.41837e-50	323.66	3	TEQGPQIDETQFK(1)K	-0.047026	1.28049	2.31628	1.83114	0.340705	0.103428	0.127952
map00280 Valine, leucine and isoleucine degradation	0.00142429	1.73	Q2XQV4	280	K	23.305	0.000824426	Up	Aldehyde dehydrogenase, mitochondrial OS=Sus scrofa OX=9823 GN=ALDH2 PE=2 SV=1	ALDH2	K00128	1	7.71847e-125	406.71	2	VAFTGSTEVGHLIQVAAGK(1)SNLK	-0.42648	1.48516	2.13671	1.23907	0.078186	0.0608686
map00280 Valine, leucine and isoleucine degradation	0.00142429	1.73	Q2XQV4	159	K	13.142	0.0225955	Up	Aldehyde dehydrogenase, mitochondrial OS=Sus scrofa OX=9823 GN=ALDH2 PE=2 SV=1	ALDH2	K00128	1	0.000621756	134.59	2	YYAGWADK(1)YHGK	-1.8788	0.940432	0.941935	2.87624	0.170285	0.0711114
map00280 Valine, leucine and isoleucine degradation	0.00142429	1.73	A0A5G2QGJ8	155	K	11.093	0.000688087	Up	Trifunctional enzyme subunit beta, mitochondrial isoform X1(predicted) OS=Sus scrofa OX=9823 GN=HADHB PE=1 SV=1	HADHB	K07509	1	0.0124735	149.4	2	AK(1)TLGQR	1.4788	1.80152	1.63004	2.07228	0.202804	0.0949351	0.198428
map00280 Valine, leucine and isoleucine degradation	0.00142429	1.73	A0A5G2QGJ8	299	K	9.076	0.000467515	Up	Trifunctional enzyme subunit beta, mitochondrial isoform X1(predicted) OS=Sus scrofa OX=9823 GN=HADHB PE=1 SV=1	HADHB	K07509	0.999806	4.038e-05	203.29	2	ALAMGYKPK(1)AYLR	1.5182	1.55471	1.53914	2.31069	0.148835	0.260978	0.185648
map00280 Valine, leucine and isoleucine degradation	0.00142429	1.73	A0A5G2QGJ8	313	K	16.541	0.0020665	Up	Trifunctional enzyme subunit beta, mitochondrial isoform X1(predicted) OS=Sus scrofa OX=9823 GN=HADHB PE=1 SV=1	HADHB	K07509	1	5.64523e-62	328.59	2	DFTYVSQDPK(1)DQLLLGPTYATPK	-0.033675	1.95993		2.62435	0.190741	0.0954038	0.129585
map00280 Valine, leucine and isoleucine degradation	0.00142429	1.73	A0A5G2QGJ8	37	K	2.493	0.0409444	Up	Trifunctional enzyme subunit beta, mitochondrial isoform X1(predicted) OS=Sus scrofa OX=9823 GN=HADHB PE=1 SV=1	HADHB	K07509	1	5.60985e-12	178.32	3	IPFLQSGTSYK(1)ELMPHDLAR	0.22899	1.58385	1.79603	0.902182	0.354256	0.755048	0.608635
map00280 Valine, leucine and isoleucine degradation	0.00142429	1.73	A0A5G2QGJ8	146	K	35.146	1.50274e-05	Up	Trifunctional enzyme subunit beta, mitochondrial isoform X1(predicted) OS=Sus scrofa OX=9823 GN=HADHB PE=1 SV=1	HADHB	K07509	1	0.00492857	121.67	2	K(1)MMLDLNK(1)AK	-2.1626	2.03128	1.82247	1.98026	0.0417937	0.0571277	0.0670698
map00280 Valine, leucine and isoleucine degradation	0.00142429	1.73	A0A5G2QGJ8	153	K	7.72	0.000687803	Up	Trifunctional enzyme subunit beta, mitochondrial isoform X1(predicted) OS=Sus scrofa OX=9823 GN=HADHB PE=1 SV=1	HADHB	K07509	1	0.00964011	112.3	2	MMLDLNK(1)AK	-0.042649	1.92004	1.60233	1.78957	0.321396	0.212996	0.153668
map00280 Valine, leucine and isoleucine degradation	0.00142429	1.73	A0A5G2QGJ8	258	K	7.07	0.00151715	Up	Trifunctional enzyme subunit beta, mitochondrial isoform X1(predicted) OS=Sus scrofa OX=9823 GN=HADHB PE=1 SV=1	HADHB	K07509	1	4.45503e-17	160.9	4	LK(1)PAFIK(1)PYGTVTAANSSFLTDGASAVLIMAEEK	0.54482	1.31942	1.82457	2.1125	0.35524	0.170018	0.21825
map00280 Valine, leucine and isoleucine degradation	0.00142429	1.73	A0A5G2QGJ8	166	K	5.194	0.000819137	Up	Trifunctional enzyme subunit beta, mitochondrial isoform X1(predicted) OS=Sus scrofa OX=9823 GN=HADHB PE=1 SV=1	HADHB	K07509	1	0.00107516	163.67	2	LSLISK(1)FR	-0.087021	1.51955	1.66216	1.24948	0.302611	0.266197
map00280 Valine, leucine and isoleucine degradation	0.00142429	1.73	A0A5G2QGJ8	60	K	5.314	0.00903139	Up	Trifunctional enzyme subunit beta, mitochondrial isoform X1(predicted) OS=Sus scrofa OX=9823 GN=HADHB PE=1 SV=1	HADHB	K07509	1	7.61819e-06	126.91	3	TSVPK(1)DVVDYLVFGTVIQEVK	0.1673	1.20824	2.07548	1.1589		0.32443	0.232946
map00280 Valine, leucine and isoleucine degradation	0.00142429	1.73	A0A5G2QGJ8	237	K	3.345	0.00573509	Up	Trifunctional enzyme subunit beta, mitochondrial isoform X1(predicted) OS=Sus scrofa OX=9823 GN=HADHB PE=1 SV=1	HADHB	K07509	1	1.55853e-32	248.18	3	VPGK(1)DTVTQDNGIRPSSLEQMAK(1)LK	-1.2425	1.49428	1.80172	1.32318	0.627408	0.452539	0.300879
map00280 Valine, leucine and isoleucine degradation	0.00142429	1.73	A0A5G2RC01	243	K	14.604	0.00030976	Up	Medium-chain specific acyl-CoA dehydrogenase, mitochondrial OS=Sus scrofa OX=9823 GN=ACADM PE=3 SV=1	ACADM	K00249	1	8.82099e-144	415.89	3	IAMGTFDK(1)TRPPVAAGAVGLAQR	1.2901	2.08446	1.85368	1.67733	0.190413	0.100478	0.0936366
map00280 Valine, leucine and isoleucine degradation	0.00142429	1.73	A0A5G2RC01	176	K	8.651	0.00162495	Up	Medium-chain specific acyl-CoA dehydrogenase, mitochondrial OS=Sus scrofa OX=9823 GN=ACADM PE=3 SV=1	ACADM	K00249	1	0.00284261	113.1	2	SDPDPK(1)APASK	0.071299	1.48828	1.81528	1.33867	0.216984		0.140773
map00280 Valine, leucine and isoleucine degradation	0.00142429	1.73	A0A5G2RC01	275	K	5.077	0.00642079	Up	Medium-chain specific acyl-CoA dehydrogenase, mitochondrial OS=Sus scrofa OX=9823 GN=ACADM PE=3 SV=1	ACADM	K00249	1	4.62663e-12	172.91	3	TFGK(1)LLAEHQGISFLLADMAMK	0.1381	1.35397	1.237	1.82866	0.360993		0.219378
map00280 Valine, leucine and isoleucine degradation	0.00142429	1.73	A0A5G2QGS5	189	K	7.57	0.00461557	Up	Acetyl-CoA acetyltransferase 1 OS=Sus scrofa OX=9823 GN=ACAT1 PE=1 SV=1	ACAT1	K00626	1	1.45144e-17	199.61	3	DGLTDVYNK(1)IHMGNCAENTAK	-0.045735	2.1555	2.01764		0.377836	0.183822	0.265202
map00280 Valine, leucine and isoleucine degradation	0.00142429	1.73	A0A5G2QGS5	244	K	12.716	0.000615442	Up	Acetyl-CoA acetyltransferase 1 OS=Sus scrofa OX=9823 GN=ACAT1 PE=1 SV=1	ACAT1	K00626	1	9.35826e-08	212.59	2	GK(1)PDTVVKEDEEYKR	-0.14921	1.5701	1.94238	2.05008	0.221611	0.121732	0.0940989
map00280 Valine, leucine and isoleucine degradation	0.00142429	1.73	A0A5G2QGS5	250	K	11.974	0.0032655	Up	Acetyl-CoA acetyltransferase 1 OS=Sus scrofa OX=9823 GN=ACAT1 PE=1 SV=1	ACAT1	K00626	1	8.23212e-40	308.74	2	GKPDTVVK(1)EDEEYKR	0.19203	1.50355	1.55256	1.68019	0.181169		0.0825359
map00280 Valine, leucine and isoleucine degradation	0.00142429	1.73	A0A5G2QGS5	267	K	12.183	0.0100254	Up	Acetyl-CoA acetyltransferase 1 OS=Sus scrofa OX=9823 GN=ACAT1 PE=1 SV=1	ACAT1	K00626	1	0.00533267	173.11	2	LK(1)TVFQK	0.48107	1.52684	1.38348	1.83026	0.198907		0.0605114
map00280 Valine, leucine and isoleucine degradation	0.00142429	1.73	A0A5G2QGS5	123	K	2.893	0.00648098	Up	Acetyl-CoA acetyltransferase 1 OS=Sus scrofa OX=9823 GN=ACAT1 PE=1 SV=1	ACAT1	K00626	1	4.41462e-10	151.42	3	QAVLGAGLPISTPCTTINK(1)VCASGMK	1.4209	1.05519	1.54805	1.46041	0.464522		0.471823
map00280 Valine, leucine and isoleucine degradation	0.00142429	1.73	A0A5G2QGS5	222	K	11.922	0.00257753	Up	Acetyl-CoA acetyltransferase 1 OS=Sus scrofa OX=9823 GN=ACAT1 PE=1 SV=1	ACAT1	K00626	1	0.0158276	91.085	2	SK(1)AAWEAGK	-0.74953	2.24838	2.19285		0.26981	0.14756	0.141401
map00280 Valine, leucine and isoleucine degradation	0.00142429	1.73	A0A5G2QGS5	262	K	25.223	0.000792457	Up	Acetyl-CoA acetyltransferase 1 OS=Sus scrofa OX=9823 GN=ACAT1 PE=1 SV=1	ACAT1	K00626	1	0.00402759	132.57	2	VDFNK(1)VPK	0.10583	1.23796	1.78037	1.85292		0.0781217	0.050632
map00280 Valine, leucine and isoleucine degradation	0.00142429	1.73	A0A5G2QJH4	99	K	15.909	0.000150734	Up	AU RNA binding methylglutaconyl-CoA hydratase OS=Sus scrofa OX=9823 GN=AUH PE=1 SV=1	AUH	K05607	1	0.000134456	161.02	2	AYAK(1)NSLSK(1)NLVK	-0.25394	2.11064	1.24639	2.28813	0.109494	0.118288	0.127062
map00280 Valine, leucine and isoleucine degradation	0.00142429	1.73	A0A5G2QJH4	104	K	10.481	6.71601e-05	Up	AU RNA binding methylglutaconyl-CoA hydratase OS=Sus scrofa OX=9823 GN=AUH PE=1 SV=1	AUH	K05607	1	0.000134456	155.11	2	NSLSK(1)NLVK	-0.034066	1.59438	2.20879	1.67424	0.201635	0.146985	0.173973
map00280 Valine, leucine and isoleucine degradation	0.00142429	1.73	A0A5G2QJH4	210	K	7.866	0.00449633	Up	AU RNA binding methylglutaconyl-CoA hydratase OS=Sus scrofa OX=9823 GN=AUH PE=1 SV=1	AUH	K05607	1	3.87421e-12	198.16	3	VAASSAK(1)MGLVETK(1)LAIIPGGGGTQR	0.27713	2.04576	1.71725	1.56024	0.353471	0.0996554	0.223623
map00280 Valine, leucine and isoleucine degradation	0.00142429	1.73	A0A5G2QJH4	159	K	3.31	0.00765945	Up	AU RNA binding methylglutaconyl-CoA hydratase OS=Sus scrofa OX=9823 GN=AUH PE=1 SV=1	AUH	K05607	1	0.000737689	102.9	3	MHSSEVGPFVSK(1)LR	-0.19858	1.21453	1.80452	1.589	0.664997	0.314411	0.412546
map00280 Valine, leucine and isoleucine degradation	0.00142429	1.73	A0A5G2QJH4	112	K	2.541	0.000224738	Up	AU RNA binding methylglutaconyl-CoA hydratase OS=Sus scrofa OX=9823 GN=AUH PE=1 SV=1	AUH	K05607	1	0.00514731	107.15	2	MLSK(1)AVDALK	0.30171	1.33513	1.27566	1.34996		0.545784	0.493461
map00280 Valine, leucine and isoleucine degradation	0.00142429	1.73	A0A5G2QR28	279	K	11.558	0.000246128	Up	3-hydroxyisobutyrate dehydrogenase, mitochondrial OS=Sus scrofa OX=9823 GN=HIBADH PE=1 SV=1	HIBADH	K00020	1	0.000898884	129.38	2	LGLDPK(1)LLAK	0.37367	1.78974	1.40637	2.3261	0.168027	0.18899	0.120772
map00280 Valine, leucine and isoleucine degradation	0.00142429	1.73	A0A5G2QR28	60	K	8.828	0.00904792	Up	3-hydroxyisobutyrate dehydrogenase, mitochondrial OS=Sus scrofa OX=9823 GN=HIBADH PE=1 SV=1	HIBADH	K00020	1	1.68276e-48	307.9	3	NLMK(1)HGYPLIIYDVFPDACK	-0.26054	1.43013	1.79848	2.16089	0.375654	0.0688928	0.165951
map00280 Valine, leucine and isoleucine degradation	0.00142429	1.73	A0A5G2QR28	362	K	4.925	0.0229761	Up	3-hydroxyisobutyrate dehydrogenase, mitochondrial OS=Sus scrofa OX=9823 GN=HIBADH PE=1 SV=1	HIBADH	K00020	1	2.74263e-16	256.19	2	GYANK(1)DFSSVFQFLR	-0.058564	1.58087	1.24695	1.57601	0.439642		0.156536
map00280 Valine, leucine and isoleucine degradation	0.00142429	1.73	A0A5G2QR28	357	K	10.199	0.00221868	Up	3-hydroxyisobutyrate dehydrogenase, mitochondrial OS=Sus scrofa OX=9823 GN=HIBADH PE=1 SV=1	HIBADH	K00020	1	0.000505001	136.16	2	LMCAK(1)GYANK	0.44018	1.19374	1.34171	2.92879	0.239169	0.142343	0.154251
map00280 Valine, leucine and isoleucine degradation	0.00142429	1.73	A0A5G2QPK6	58	K	14.471	0.00105459	Up	Dihydrolipoyl dehydrogenase OS=Sus scrofa OX=9823 GN=DLD PE=1 SV=1	DLD	K00382	1	6.98919e-05	196.48	2	AAQLGFK(1)TVCIEK	0.0011054	1.63951	1.56697	2.40569	0.205739	0.0759641	0.106127
map00280 Valine, leucine and isoleucine degradation	0.00142429	1.73	A0A5G2QPK6	96	K	7.669	0.00101237	Up	Dihydrolipoyl dehydrogenase OS=Sus scrofa OX=9823 GN=DLD PE=1 SV=1	DLD	K00382	1	6.69026e-49	313.04	4	ALLNNSHYYHMAHGK(1)DFASR	0.81498	1.90275	1.34769	2.05746	0.18081	0.180116	0.331169
map00280 Valine, leucine and isoleucine degradation	0.00142429	1.73	A0A5G2QPK6	135	K	2.712	0.0179189	Up	Dihydrolipoyl dehydrogenase OS=Sus scrofa OX=9823 GN=DLD PE=1 SV=1	DLD	K00382	1	2.83008e-140	407.16	3	SNAVK(1)ALTGGIAHLFK(1)QNK	-0.511	1.39969	1.94509	1.03871	0.37931	0.71524	0.52196
map00280 Valine, leucine and isoleucine degradation	0.00142429	1.73	A0A5G2QPK6	409	K	4.416	0.00806848	Up	Dihydrolipoyl dehydrogenase OS=Sus scrofa OX=9823 GN=DLD PE=1 SV=1	DLD	K00382	1	9.81057e-41	315.21	2	EEGIEYK(1)VGK	0.0090722	1.65767	1.73328	1.50127	0.597975	0.312334	0.197473
map00280 Valine, leucine and isoleucine degradation	0.00142429	1.73	A0A5G2QPK6	269	K	10.152	0.000750656	Up	Dihydrolipoyl dehydrogenase OS=Sus scrofa OX=9823 GN=DLD PE=1 SV=1	DLD	K00382	1	0.00021351	178.55	2	LNTK(1)VIGATK	-0.50256	1.41263	1.84138	2.20799	0.246217	0.175624	0.11616
map00280 Valine, leucine and isoleucine degradation	0.00142429	1.73	A0A5G2QPK6	338	K	5.662	0.00569049	Up	Dihydrolipoyl dehydrogenase OS=Sus scrofa OX=9823 GN=DLD PE=1 SV=1	DLD	K00382	1	2.12613e-09	154.65	3	FQTK(1)IPNIYAIGDVVAGPMLAHK	-0.4543	1.04519	1.32725	2.7269	0.242605	0.311758	0.346298
map00280 Valine, leucine and isoleucine degradation	0.00142429	1.73	A0A5G2QPK6	259	K	4.306	0.00171738	Up	Dihydrolipoyl dehydrogenase OS=Sus scrofa OX=9823 GN=DLD PE=1 SV=1	DLD	K00382	1	0.000942284	135.83	2	ILQK(1)QGFK(1)FK	-0.29711	1.38859	1.8666	1.61407	0.515362	0.282005	0.333363
map00280 Valine, leucine and isoleucine degradation	0.00142429	1.73	A0A5G2QPK6	151	K	12.703	0.000528701	Up	Dihydrolipoyl dehydrogenase OS=Sus scrofa OX=9823 GN=DLD PE=1 SV=1	DLD	K00382	1	5.05413e-10	201.61	3	ITGK(1)NQVTATK(1)ADGSTEVINTK	0.16389	1.75435	1.80692	2.00089	0.222108	0.0946223	0.121115
map00280 Valine, leucine and isoleucine degradation	0.00142429	1.73	A0A5G2QPK6	158	K	21.78	0.00019812	Up	Dihydrolipoyl dehydrogenase OS=Sus scrofa OX=9823 GN=DLD PE=1 SV=1	DLD	K00382	1	9.13913e-100	377.19	2	NQVTATK(1)ADGSTEVINTK	-0.156	1.61789	2.19801	1.92072	0.121481	0.0855181	0.0563852
map00280 Valine, leucine and isoleucine degradation	0.00142429	1.73	A0A5G2QPK6	119	K	12.123	0.00472041	Up	Dihydrolipoyl dehydrogenase OS=Sus scrofa OX=9823 GN=DLD PE=1 SV=1	DLD	K00382	1	9.06167e-05	179.1	2	MMEQK(1)SNAVK	-0.32445	1.39617	0.839096	3.30751	0.181401	0.130613	0.145213
map00280 Valine, leucine and isoleucine degradation	0.00142429	1.73	A0A5G2QPK6	124	K	11.949	0.0040856	Up	Dihydrolipoyl dehydrogenase OS=Sus scrofa OX=9823 GN=DLD PE=1 SV=1	DLD	K00382	1	1.49524e-09	167.14	3	SNAVK(1)ALTGGIAHLFK(1)QNK	-0.511	2.07125	0.955968	1.70857	0.123067	0.141145
map00280 Valine, leucine and isoleucine degradation	0.00142429	1.73	A0A5G2QPK6	402	K	2.117	0.0256796	Up	Dihydrolipoyl dehydrogenase OS=Sus scrofa OX=9823 GN=DLD PE=1 SV=1	DLD	K00382	1	6.03025e-06	209.19	2	SEEQLK(1)EEGIEYK	0.28517	1.32037	1.83202	0.922558	0.625911	0.712405	0.586733
map00280 Valine, leucine and isoleucine degradation	0.00142429	1.73	A0A5G2QSR2	56	K	5.021	0.00111427	Up	Hydroxysteroid 17-beta dehydrogenase 10 OS=Sus scrofa OX=9823 GN=HSD17B10 PE=1 SV=1	HSD17B10	K08683	1	5.29832e-99	380.13	2	LGK(1)SCAFAPADVTSEK	0.3684	1.39787	1.4795	2.1261	0.262432	0.309106	0.424988
map00280 Valine, leucine and isoleucine degradation	0.00142429	1.73	A0A5G2QSR2	52	K	6.364	0.000173841	Up	Hydroxysteroid 17-beta dehydrogenase 10 OS=Sus scrofa OX=9823 GN=HSD17B10 PE=1 SV=1	HSD17B10	K08683	1	4.0797e-28	228.6	3	LVGQGASAVLLDLPHSDGEAQAK(1)K	-0.44388	1.74864	1.47964	1.95696	0.333912	0.247394	0.23345
map00280 Valine, leucine and isoleucine degradation	0.00142429	1.73	A0A5G2QSR2	9	K	5.724	0.0479807	Up	Hydroxysteroid 17-beta dehydrogenase 10 OS=Sus scrofa OX=9823 GN=HSD17B10 PE=1 SV=1	HSD17B10	K08683	1	3.52068e-07	127.28	3	SVK(1)GLVAIITGGASGLGLATAER	-0.36315	1.72462	2.12685	0.626924		0.30895	0.21266
map00280 Valine, leucine and isoleucine degradation	0.00142429	1.73	A0A5G2QSR2	99	K	17.16	2.60789e-06	Up	Hydroxysteroid 17-beta dehydrogenase 10 OS=Sus scrofa OX=9823 GN=HSD17B10 PE=1 SV=1	HSD17B10	K08683	1	3.87487e-61	335.1	3	VDVAVNCAGIGVASK(1)TYNLK	2.7396	1.83568	2.10653	1.7274	0.117796	0.111137	0.101458
map00280 Valine, leucine and isoleucine degradation	0.00142429	1.73	A0A5G2RA17	28	K	4.318	0.0102673	Up	Aldehyde dehydrogenase 6 family member A1 OS=Sus scrofa OX=9823 GN=ALDH6A1 PE=1 SV=1	ALDH6A1	K00140	1	0.0118219	86.18	2	LFIGGK(1)FIESK	-1.3209	1.76493	1.61096	0.955402	0.33137	0.337342
map00280 Valine, leucine and isoleucine degradation	0.00142429	1.73	A0A5G2RA17	57	K	21.395	0.000334485	Up	Aldehyde dehydrogenase 6 family member A1 OS=Sus scrofa OX=9823 GN=ALDH6A1 PE=1 SV=1	ALDH6A1	K00140	1	5.32736e-44	313.31	3	VPQATK(1)AEMDAAVSSCK	-0.45464	2.19362	1.567	1.97148	0.137999	0.0690887	0.060825
map00280 Valine, leucine and isoleucine degradation	0.00142429	1.73	A0A5S6HDE4	231	K	2.576	0.00250875	Up	Hydroxyacyl-coenzyme A dehydrogenase, mitochondrial OS=Sus scrofa OX=9823 GN=HADH PE=1 SV=1	HADH	K00022	1	6.94408e-05	150.09	2	GDASK(1)EDIDTAMK	0.26145	1.5284	1.65931	1.1345	0.633765	0.559479	0.484542
map00280 Valine, leucine and isoleucine degradation	0.00142429	1.73	A0A5S6HDE4	202	K	18.551	0.000642125	Up	Hydroxyacyl-coenzyme A dehydrogenase, mitochondrial OS=Sus scrofa OX=9823 GN=HADH PE=1 SV=1	HADH	K00022	1	2.6101e-135	417.7	3	HPVSCK(1)DTPGFIVNR	0.22751	2.15088	1.56223	1.97999	0.167468	0.0746803	0.0647446
map00280 Valine, leucine and isoleucine degradation	0.00142429	1.73	A0A5S6HDE4	68	K	2.566	0.0197806	Up	Hydroxyacyl-coenzyme A dehydrogenase, mitochondrial OS=Sus scrofa OX=9823 GN=HADH PE=1 SV=1	HADH	K00022	1	0.00335906	129.56	2	K(1)GIEESLR	-0.2846	1.35863	1.55845	1.05167		0.614864	0.41638
map00280 Valine, leucine and isoleucine degradation	0.00142429	1.73	A0A5S6HDE4	192	K	6.499	0.000761788	Up	Hydroxyacyl-coenzyme A dehydrogenase, mitochondrial OS=Sus scrofa OX=9823 GN=HADH PE=1 SV=1	HADH	K00022	1	3.51536e-06	201.6	2	TLESLVDFSK(1)TLGK	-0.3572	1.72206	1.91896	1.55885	0.375695	0.194467	0.229971
map00280 Valine, leucine and isoleucine degradation	0.00142429	1.73	F6PZX4	137	K	16.801	3.14326e-06	Up	Acetyl-CoA acyltransferase 2 OS=Sus scrofa OX=9823 GN=ACAA2 PE=1 SV=2	ACAA2	K07508	1	0.00067048	167.93	2	FGTK(1)LGLDLK	1.2504	1.76597	2.08118	1.8158	0.103507	0.108565	0.124983
map00280 Valine, leucine and isoleucine degradation	0.00142429	1.73	F6PZX4	13	K	16.291	0.000218767	Up	Acetyl-CoA acyltransferase 2 OS=Sus scrofa OX=9823 GN=ACAA2 PE=1 SV=2	ACAA2	K07508	1	0.000343022	146.94	2	GVFIVAAK(1)R	-0.47461	1.94982	1.746	1.95718	0.162848	0.076179	0.107977
map00280 Valine, leucine and isoleucine degradation	0.00142429	1.73	F6PZX4	270	K	21.734	1.75916e-05	Up	Acetyl-CoA acyltransferase 2 OS=Sus scrofa OX=9823 GN=ACAA2 PE=1 SV=2	ACAA2	K07508	1	0.000233206	175.44	3	K(1)HNFTPLAR	-0.70551	1.70119	1.88685	2.14804	0.108045	0.0778522	0.0780238
map00280 Valine, leucine and isoleucine degradation	0.00142429	1.73	F6PZX4	234	K	6.409	0.00577129	Up	Acetyl-CoA acyltransferase 2 OS=Sus scrofa OX=9823 GN=ACAA2 PE=1 SV=2	ACAA2	K07508	1	2.84299e-22	262.64	3	PQTTLEQLSK(1)LPPVFK	-0.32349	2.02225	2.02944		0.453748	0.228696	0.26587
map00280 Valine, leucine and isoleucine degradation	0.00142429	1.73	Q29554	262	K	7.157	0.000148423	Up	Trifunctional enzyme subunit alpha, mitochondrial OS=Sus scrofa OX=9823 GN=HADHA PE=2 SV=1	HADHA	K07515	1	0.0230026	111.39	2	DK(1)GLVEK	1.9227	1.50796	2.12247	1.63404	0.279951	0.203239	0.252339
map00280 Valine, leucine and isoleucine degradation	0.00142429	1.73	Q29554	337	K	5.135	0.00990179	Up	Trifunctional enzyme subunit alpha, mitochondrial OS=Sus scrofa OX=9823 GN=HADHA PE=2 SV=1	HADHA	K07515	1	0.000273283	140.14	2	ESK(1)ALMGLYR	0.70982	1.50834	1.78929	1.72442	0.593777	0.169854	0.214311
map00280 Valine, leucine and isoleucine degradation	0.00142429	1.73	Q29554	362	K	12.399	0.00224888	Up	Trifunctional enzyme subunit alpha, mitochondrial OS=Sus scrofa OX=9823 GN=HADHA PE=2 SV=1	HADHA	K07515	1	9.1233e-14	179.64	3	EVK(1)HLAILGAGLMGAGIAQVSVDK	-0.67277	1.6314	1.74674	2.17407	0.222383	0.160488	0.064918
map00280 Valine, leucine and isoleucine degradation	0.00142429	1.73	Q29554	383	K	19.394	9.94043e-06	Up	Trifunctional enzyme subunit alpha, mitochondrial OS=Sus scrofa OX=9823 GN=HADHA PE=2 SV=1	HADHA	K07515	1	3.28254e-38	274.47	4	HLAILGAGLMGAGIAQVSVDK(1)HLK	-0.1212	2.12967	1.89821	1.67791	0.090733	0.114597	0.0888792
map00280 Valine, leucine and isoleucine degradation	0.00142429	1.73	Q29554	644	K	15.327	0.0011441	Up	Trifunctional enzyme subunit alpha, mitochondrial OS=Sus scrofa OX=9823 GN=HADHA PE=2 SV=1	HADHA	K07515	1	8.86086e-20	266.58	2	GFYVYQEGVK(1)NR	0.60213	1.48671	2.30343	1.84236	0.198756	0.100973	0.067768
map00280 Valine, leucine and isoleucine degradation	0.00142429	1.73	Q29554	411	K	11.934	0.000413425	Up	Trifunctional enzyme subunit alpha, mitochondrial OS=Sus scrofa OX=9823 GN=HADHA PE=2 SV=1	HADHA	K07515	1	1.50313e-28	286.45	3	GQQQVFK(1)GLNDK(1)VR	1.615	1.57651	2.0978	1.86178	0.219664	0.140402	0.103844
map00280 Valine, leucine and isoleucine degradation	0.00142429	1.73	Q29554	309	K	9.663	0.00122596	Up	Trifunctional enzyme subunit alpha, mitochondrial OS=Sus scrofa OX=9823 GN=HADHA PE=2 SV=1	HADHA	K07515	1	5.4447e-28	256.9	3	IIDVVK(1)TGIEQGSDAGYLSESQK	-0.48788	1.59465	1.25306	2.5896	0.237413	0.19424	0.131039
map00280 Valine, leucine and isoleucine degradation	0.00142429	1.73	Q29554	406	K	5.333	0.000909967	Up	Trifunctional enzyme subunit alpha, mitochondrial OS=Sus scrofa OX=9823 GN=HADHA PE=2 SV=1	HADHA	K07515	1	1.50313e-28	286.45	3	GQQQVFK(1)GLNDK(1)VR	1.615	1.48731	1.95748	1.60773	0.404543	0.222485	0.320456
map00280 Valine, leucine and isoleucine degradation	0.00142429	1.73	Q29554	350	K	14.935	0.00147652	Up	Trifunctional enzyme subunit alpha, mitochondrial OS=Sus scrofa OX=9823 GN=HADHA PE=2 SV=1	HADHA	K07515	1	0.00182356	143.91	2	GQTLCK(1)K(1)NK	-0.2853	1.30268	1.99373	2.32706	0.21086	0.0863472	0.0793269
map00280 Valine, leucine and isoleucine degradation	0.00142429	1.73	Q29554	351	K	14.935	0.00147652	Up	Trifunctional enzyme subunit alpha, mitochondrial OS=Sus scrofa OX=9823 GN=HADHA PE=2 SV=1	HADHA	K07515	1	0.00182356	143.91	2	GQTLCK(1)K(1)NK	-0.2853	1.30268	1.99373	2.32706	0.21086	0.0863472	0.0793269
map00280 Valine, leucine and isoleucine degradation	0.00142429	1.73	Q29554	386	K	12.376	0.0015873	Up	Trifunctional enzyme subunit alpha, mitochondrial OS=Sus scrofa OX=9823 GN=HADHA PE=2 SV=1	HADHA	K07515	1	0.0143054	129.47	2	HLK(1)TILK	-0.23222	1.92691	1.70284	1.92167	0.239517	0.0732694	0.135795
map00280 Valine, leucine and isoleucine degradation	0.00142429	1.73	Q29554	569	K	6.484	0.000221604	Up	Trifunctional enzyme subunit alpha, mitochondrial OS=Sus scrofa OX=9823 GN=HADHA PE=2 SV=1	HADHA	K07515	1	6.69682e-05	145.17	2	ILQEGVGPK(1)K	-0.45387	1.48643	2.22279	1.4891	0.264961	0.295403	0.241316
map00280 Valine, leucine and isoleucine degradation	0.00142429	1.73	Q29554	415	K	5.846	0.000430241	Up	Trifunctional enzyme subunit alpha, mitochondrial OS=Sus scrofa OX=9823 GN=HADHA PE=2 SV=1	HADHA	K07515	1	0.0156839	109.71	2	K(1)K(1)ALTSFER	0.00556	1.54473	1.83478	1.74407	0.387967	0.259421	0.22904
map00280 Valine, leucine and isoleucine degradation	0.00142429	1.73	Q29554	414	K	6.775	0.000281527	Up	Trifunctional enzyme subunit alpha, mitochondrial OS=Sus scrofa OX=9823 GN=HADHA PE=2 SV=1	HADHA	K07515	1	0.0196487	109.71	2	K(1)K(1)ALTSFER	0.00556	1.58979	1.87795	1.76058	0.3357	0.237865	0.198115
map00280 Valine, leucine and isoleucine degradation	0.00142429	1.73	Q29554	597	K	49.862	0.000225682	Up	Trifunctional enzyme subunit alpha, mitochondrial OS=Sus scrofa OX=9823 GN=HADHA PE=2 SV=1	HADHA	K07515	1	1.99798e-98	345.79	4	LDSLTTSFGFPVGAATLMDEVGMDVAK(1)HVAENLGK	0.19193	1.33536	2.20761	2.33906	0.0270586	0.0610966	0.0298099
map00280 Valine, leucine and isoleucine degradation	0.00142429	1.73	Q29554	214	K	8.368	0.0165153	Up	Trifunctional enzyme subunit alpha, mitochondrial OS=Sus scrofa OX=9823 GN=HADHA PE=2 SV=1	HADHA	K07515	1	0.000150662	100.08	3	K(1)MGLVDQLVEPLGPGLKPPEER	-0.76534	1.29578	2.1035	1.23176		0.275297	0.0936636
map00280 Valine, leucine and isoleucine degradation	0.00142429	1.73	Q29554	292	K	7.381	9.84506e-05	Up	Trifunctional enzyme subunit alpha, mitochondrial OS=Sus scrofa OX=9823 GN=HADHA PE=2 SV=1	HADHA	K07515	1	1.84032e-12	234.92	2	K(1)QTK(1)GLYPAPLK	-0.034596	1.4069	1.90507	1.97215	0.272319	0.225776	0.217793
map00280 Valine, leucine and isoleucine degradation	0.00142429	1.73	Q29554	295	K	7.591	0.00013527	Up	Trifunctional enzyme subunit alpha, mitochondrial OS=Sus scrofa OX=9823 GN=HADHA PE=2 SV=1	HADHA	K07515	1	1.84032e-12	234.92	2	QTK(1)GLYPAPLK(1)IIDVVK	0.38096	1.32944	2.05122	1.92096	0.245202	0.217096	0.236093
map00280 Valine, leucine and isoleucine degradation	0.00142429	1.73	Q29554	634	K	6.425	0.011437	Up	Trifunctional enzyme subunit alpha, mitochondrial OS=Sus scrofa OX=9823 GN=HADHA PE=2 SV=1	HADHA	K07515	1	5.26918e-05	156.01	2	SGK(1)GFYVYQEGVK	0.6105	1.04396	1.88455	2.26345	0.490762	0.16206	0.155214
map00280 Valine, leucine and isoleucine degradation	0.00142429	1.73	Q29554	285	K	23.805	0.00153919	Up	Trifunctional enzyme subunit alpha, mitochondrial OS=Sus scrofa OX=9823 GN=HADHA PE=2 SV=1	HADHA	K07515	1	0.00173611	188.81	2	K(1)VEEK(1)VR	-1.2912	1.59953	1.42516	1.83909	0.0920056	0.044207
map00280 Valine, leucine and isoleucine degradation	0.00142429	1.73	Q29554	289	K	23.805	0.00153919	Up	Trifunctional enzyme subunit alpha, mitochondrial OS=Sus scrofa OX=9823 GN=HADHA PE=2 SV=1	HADHA	K07515	1	0.00173611	188.81	2	K(1)VEEK(1)VR	-1.2912	1.59953	1.42516	1.83909	0.0920056	0.044207
map00280 Valine, leucine and isoleucine degradation	0.00142429	1.73	Q29554	735	K	3.491	0.0118892	Up	Trifunctional enzyme subunit alpha, mitochondrial OS=Sus scrofa OX=9823 GN=HADHA PE=2 SV=1	HADHA	K07515	1	0.0119138	104.06	2	K(1)YEAIYGK	0.26186	1.23405	2.03733	1.39269	0.638898	0.430363	0.266668
map00280 Valine, leucine and isoleucine degradation	0.00142429	1.73	Q29554	742	K	7.604	0.0174953	Up	Trifunctional enzyme subunit alpha, mitochondrial OS=Sus scrofa OX=9823 GN=HADHA PE=2 SV=1	HADHA	K07515	1	3.33074e-56	310.9	3	YEAIYGK(1)QFTPCQLLIDHASSPNK	-0.40933	2.1914	0.973562	2.13768	0.472701	0.137778	0.0868798
map00280 Valine, leucine and isoleucine degradation	0.00142429	1.73	Q29554	534	K	4.968	0.000506262	Up	Trifunctional enzyme subunit alpha, mitochondrial OS=Sus scrofa OX=9823 GN=HADHA PE=2 SV=1	HADHA	K07515	1	0.00874134	105.14	2	QGK(1)VIIVVK	0.043046	1.36823	1.52781	2.09859	0.391651	0.323143	0.290575
map00280 Valine, leucine and isoleucine degradation	0.00142429	1.73	Q29554	540	K	14.449	0.000158613	Up	Trifunctional enzyme subunit alpha, mitochondrial OS=Sus scrofa OX=9823 GN=HADHA PE=2 SV=1	HADHA	K07515	1	7.99001e-16	250.94	2	VIIVVK(1)DGPGFYTTR	-0.12074	1.60044	2.05039	1.96079	0.178844	0.100987	0.108549
map00280 Valine, leucine and isoleucine degradation	0.00142429	1.73	Q29554	625	K	7.608	0.00111284	Up	Trifunctional enzyme subunit alpha, mitochondrial OS=Sus scrofa OX=9823 GN=HADHA PE=2 SV=1	HADHA	K07515	1	0.0025854	118.5	2	QMISK(1)GFLGR	-0.27704	1.1603	1.70591	2.43674	0.275322	0.229837	0.191894
map00280 Valine, leucine and isoleucine degradation	0.00142429	1.73	Q29554	505	K	6.295	0.000205172	Up	Trifunctional enzyme subunit alpha, mitochondrial OS=Sus scrofa OX=9823 GN=HADHA PE=2 SV=1	HADHA	K07515	1	1.51822e-08	153.88	3	VIGMHYFSPVDK(1)MQLLEIITTEK(1)TSK	-0.39814	1.33542	1.74453	2.09761	0.265787	0.302348	0.254302
map00280 Valine, leucine and isoleucine degradation	0.00142429	1.73	Q29554	46	K	8.052	0.000393129	Up	Trifunctional enzyme subunit alpha, mitochondrial OS=Sus scrofa OX=9823 GN=HADHA PE=2 SV=1	HADHA	K07515	1	3.54276e-40	307.15	3	THINYGVK(1)GDVAVIR	-0.22291	1.61211	1.97531	1.74975	0.298486	0.205942	0.158402
map00280 Valine, leucine and isoleucine degradation	0.00142429	1.73	Q29554	249	K	26.732	0.000913743	Up	Trifunctional enzyme subunit alpha, mitochondrial OS=Sus scrofa OX=9823 GN=HADHA PE=2 SV=1	HADHA	K07515	1	1.15063e-11	195.1	2	TIEYLEEVAVTFAK(1)GLADK	0.45096	1.91777	1.70262	1.25795	0.0458436		0.0758183
map00310 Lysine degradation	0.000360171	2.22	A0A287ADK3	409	K	17.969	0.0215392	Up	Aldehyde dehydrogenase (NAD(+)) OS=Sus scrofa OX=9823 GN=ALDH7A1 PE=1 SV=1	ALDH7A1	K14085	1	5.53261e-40	301.93	3	FK(1)NEDEVFAWNNEVK	-0.20014	1.56962	0.998956	2.25255	0.152374	0.0264957
map00310 Lysine degradation	0.000360171	2.22	A0A287ADK3	322	K	11.332	0.000279857	Up	Aldehyde dehydrogenase (NAD(+)) OS=Sus scrofa OX=9823 GN=ALDH7A1 PE=1 SV=1	ALDH7A1	K14085	1	0.00984518	102.95	2	LTK(1)AYAQIR	-0.33877	1.5294	2.12202	1.86203	0.224637	0.125655	0.136265
map00310 Lysine degradation	0.000360171	2.22	I3LHA2	1570	K	38.315	0.00392906	Up	[Histone H3]-lysine(4) N-trimethyltransferase OS=Sus scrofa OX=9823 GN=KMT2C PE=4 SV=2	KMT2C	K09188	1	0.00955118	87.719	2	SK(1)QQAK(1)IEATQK(1)LEQVK	3.6087	1.96571	1.02763	2.85405	0.0923829	0.0469381	0.0132925
map00310 Lysine degradation	0.000360171	2.22	I3LHA2	1574	K	38.315	0.00392906	Up	[Histone H3]-lysine(4) N-trimethyltransferase OS=Sus scrofa OX=9823 GN=KMT2C PE=4 SV=2	KMT2C	K09188	1	0.00955118	87.719	2	SK(1)QQAK(1)IEATQK(1)LEQVK	3.6087	1.96571	1.02763	2.85405	0.0923829	0.0469381	0.0132925
map00310 Lysine degradation	0.000360171	2.22	I3LHA2	1580	K	38.315	0.00392906	Up	[Histone H3]-lysine(4) N-trimethyltransferase OS=Sus scrofa OX=9823 GN=KMT2C PE=4 SV=2	KMT2C	K09188	1	0.00955118	87.719	2	SK(1)QQAK(1)IEATQK(1)LEQVK	3.6087	1.96571	1.02763	2.85405	0.0923829	0.0469381	0.0132925
map00310 Lysine degradation	0.000360171	2.22	A0A287AA21	139	K	20.278	0.000317685	Up	Enoyl-CoA hydratase, mitochondrial OS=Sus scrofa OX=9823 GN=ECHS1 PE=1 SV=2	ECHS1	K07511	1	2.67594e-146	404.47	4	AFAAGADIK(1)EMQNQTFQDCYSGGFLSHWDHLSR	0.4262	2.63466		2.02096	0.096066	0.133847	0.11447
map00310 Lysine degradation	0.000360171	2.22	A0A287AA21	320	K	6.846	0.0125963	Up	Enoyl-CoA hydratase, mitochondrial OS=Sus scrofa OX=9823 GN=ECHS1 PE=1 SV=2	ECHS1	K07511	1	0.00959304	88.364	2	EGMTAFVEK(1)R	0.70354	1.44063	1.29248	1.82318	0.319528	0.124176
map00310 Lysine degradation	0.000360171	2.22	A0A287AA21	81	K	34.123	0.00143034	Up	Enoyl-CoA hydratase, mitochondrial OS=Sus scrofa OX=9823 GN=ECHS1 PE=1 SV=2	ECHS1	K07511	1	5.79872e-96	376.25	2	GK(1)SSNVGLIQLNRPK	0.042881	1.85701	1.5273	2.44486	0.109275	0.0233578	0.0381957
map00310 Lysine degradation	0.000360171	2.22	A0A287AA21	94	K	3.783	0.0112545	Up	Enoyl-CoA hydratase, mitochondrial OS=Sus scrofa OX=9823 GN=ECHS1 PE=1 SV=2	ECHS1	K07511	1	0.000289903	179.21	2	PK(1)ALNALCK	-1.0226	1.47849	1.44979	1.81725	0.702539	0.28967	0.262259
map00310 Lysine degradation	0.000360171	2.22	A0A287ALM2	748	K	21.105	0.0174541	Up	Oxoglutarate dehydrogenase (succinyl-transferring) OS=Sus scrofa OX=9823 GN=DHTKD1 PE=1 SV=1	DHTKD1	K15791	1	0.0111592	91.636	2	VK(1)SLVFCSGK	0.18182		1.54857	2.27047	0.12234		0.0586163
map00310 Lysine degradation	0.000360171	2.22	A0A287BAZ8	321	K	16.9	0.000473841	Up	Lysine ketoglutarate reductase OS=Sus scrofa OX=9823 GN=AASS PE=1 SV=2	AASS	K14157	1	6.86637e-43	307.32	2	TDGVYDPIEYDK(1)HPER	0.59106	1.64167	1.35089	2.67225	0.152804	0.0847786	0.097612
map00310 Lysine degradation	0.000360171	2.22	A0A287BAZ8	23	K	6.542	1.21191e-05	Up	Lysine ketoglutarate reductase OS=Sus scrofa OX=9823 GN=AASS PE=1 SV=2	AASS	K14157	1	0.000821172	112.75	2	LHHK(1)AVMALR	-0.24322	1.82443	1.67046	1.70957	0.269504	0.292608	0.233424
map00310 Lysine degradation	0.000360171	2.22	Q2XQV4	432	K	9.995	0.00100617	Up	Aldehyde dehydrogenase, mitochondrial OS=Sus scrofa OX=9823 GN=ALDH2 PE=2 SV=1	ALDH2	K00128	1	0.000171453	152.34	2	FK(1)TIEEVIGR	0.50264	1.99671	2.16627	1.29131	0.17112	0.119906	0.254688
map00310 Lysine degradation	0.000360171	2.22	Q2XQV4	379	K	12.974	0.00838091	Up	Aldehyde dehydrogenase, mitochondrial OS=Sus scrofa OX=9823 GN=ALDH2 PE=2 SV=1	ALDH2	K00128	1	0.0325645	76.827	2	ILGYIK(1)SGK	-0.12652	1.15901	1.47018	2.12645	0.176825		0.0675384
map00310 Lysine degradation	0.000360171	2.22	Q2XQV4	372	K	9.488	0.00431005	Up	Aldehyde dehydrogenase, mitochondrial OS=Sus scrofa OX=9823 GN=ALDH2 PE=2 SV=1	ALDH2	K00128	1	2.41837e-50	323.66	3	TEQGPQIDETQFK(1)K	-0.047026	1.28049	2.31628	1.83114	0.340705	0.103428	0.127952
map00310 Lysine degradation	0.000360171	2.22	Q2XQV4	280	K	23.305	0.000824426	Up	Aldehyde dehydrogenase, mitochondrial OS=Sus scrofa OX=9823 GN=ALDH2 PE=2 SV=1	ALDH2	K00128	1	7.71847e-125	406.71	2	VAFTGSTEVGHLIQVAAGK(1)SNLK	-0.42648	1.48516	2.13671	1.23907	0.078186	0.0608686
map00310 Lysine degradation	0.000360171	2.22	Q2XQV4	159	K	13.142	0.0225955	Up	Aldehyde dehydrogenase, mitochondrial OS=Sus scrofa OX=9823 GN=ALDH2 PE=2 SV=1	ALDH2	K00128	1	0.000621756	134.59	2	YYAGWADK(1)YHGK	-1.8788	0.940432	0.941935	2.87624	0.170285	0.0711114
map00310 Lysine degradation	0.000360171	2.22	F1SUX9	174	K	9.599	0.00154157	Up	PR/SET domain 2 OS=Sus scrofa OX=9823 GN=PRDM2 PE=4 SV=2	PRDM2	K11432	1	0.0212398	59.067	2	K(1)SQENK(1)NK(1)ANK	-2.4384	1.17723	1.50509	1.99297	0.17141	0.153292
map00310 Lysine degradation	0.000360171	2.22	F1SUX9	179	K	9.599	0.00154157	Up	PR/SET domain 2 OS=Sus scrofa OX=9823 GN=PRDM2 PE=4 SV=2	PRDM2	K11432	1	0.0212398	59.067	2	K(1)SQENK(1)NK(1)ANK	-2.4384	1.17723	1.50509	1.99297	0.17141	0.153292
map00310 Lysine degradation	0.000360171	2.22	F1SUX9	181	K	9.599	0.00154157	Up	PR/SET domain 2 OS=Sus scrofa OX=9823 GN=PRDM2 PE=4 SV=2	PRDM2	K11432	1	0.0212398	59.067	2	K(1)SQENK(1)NK(1)ANK	-2.4384	1.17723	1.50509	1.99297	0.17141	0.153292
map00310 Lysine degradation	0.000360171	2.22	A0A5G2QGS5	189	K	7.57	0.00461557	Up	Acetyl-CoA acetyltransferase 1 OS=Sus scrofa OX=9823 GN=ACAT1 PE=1 SV=1	ACAT1	K00626	1	1.45144e-17	199.61	3	DGLTDVYNK(1)IHMGNCAENTAK	-0.045735	2.1555	2.01764		0.377836	0.183822	0.265202
map00310 Lysine degradation	0.000360171	2.22	A0A5G2QGS5	244	K	12.716	0.000615442	Up	Acetyl-CoA acetyltransferase 1 OS=Sus scrofa OX=9823 GN=ACAT1 PE=1 SV=1	ACAT1	K00626	1	9.35826e-08	212.59	2	GK(1)PDTVVKEDEEYKR	-0.14921	1.5701	1.94238	2.05008	0.221611	0.121732	0.0940989
map00310 Lysine degradation	0.000360171	2.22	A0A5G2QGS5	250	K	11.974	0.0032655	Up	Acetyl-CoA acetyltransferase 1 OS=Sus scrofa OX=9823 GN=ACAT1 PE=1 SV=1	ACAT1	K00626	1	8.23212e-40	308.74	2	GKPDTVVK(1)EDEEYKR	0.19203	1.50355	1.55256	1.68019	0.181169		0.0825359
map00310 Lysine degradation	0.000360171	2.22	A0A5G2QGS5	267	K	12.183	0.0100254	Up	Acetyl-CoA acetyltransferase 1 OS=Sus scrofa OX=9823 GN=ACAT1 PE=1 SV=1	ACAT1	K00626	1	0.00533267	173.11	2	LK(1)TVFQK	0.48107	1.52684	1.38348	1.83026	0.198907		0.0605114
map00310 Lysine degradation	0.000360171	2.22	A0A5G2QGS5	123	K	2.893	0.00648098	Up	Acetyl-CoA acetyltransferase 1 OS=Sus scrofa OX=9823 GN=ACAT1 PE=1 SV=1	ACAT1	K00626	1	4.41462e-10	151.42	3	QAVLGAGLPISTPCTTINK(1)VCASGMK	1.4209	1.05519	1.54805	1.46041	0.464522		0.471823
map00310 Lysine degradation	0.000360171	2.22	A0A5G2QGS5	222	K	11.922	0.00257753	Up	Acetyl-CoA acetyltransferase 1 OS=Sus scrofa OX=9823 GN=ACAT1 PE=1 SV=1	ACAT1	K00626	1	0.0158276	91.085	2	SK(1)AAWEAGK	-0.74953	2.24838	2.19285		0.26981	0.14756	0.141401
map00310 Lysine degradation	0.000360171	2.22	A0A5G2QGS5	262	K	25.223	0.000792457	Up	Acetyl-CoA acetyltransferase 1 OS=Sus scrofa OX=9823 GN=ACAT1 PE=1 SV=1	ACAT1	K00626	1	0.00402759	132.57	2	VDFNK(1)VPK	0.10583	1.23796	1.78037	1.85292		0.0781217	0.050632
map00310 Lysine degradation	0.000360171	2.22	A0A5S6FV10	132	K	5.587	4.02744e-06	Up	Dihydrolipoyllysine-residue succinyltransferase component of 2-oxoglutarate dehydrogenase complex, mitochondrial OS=Sus scrofa OX=9823 GN=DLST PE=3 SV=1	DLST	K00658	1	0.0311311	72.434	2	AK(1)PAEAPAAAAPK	-1.0013	1.58949	1.85452	1.64508	0.311255	0.295046	0.304612
map00310 Lysine degradation	0.000360171	2.22	A0A5G2QPK6	58	K	14.471	0.00105459	Up	Dihydrolipoyl dehydrogenase OS=Sus scrofa OX=9823 GN=DLD PE=1 SV=1	DLD	K00382	1	6.98919e-05	196.48	2	AAQLGFK(1)TVCIEK	0.0011054	1.63951	1.56697	2.40569	0.205739	0.0759641	0.106127
map00310 Lysine degradation	0.000360171	2.22	A0A5G2QPK6	96	K	7.669	0.00101237	Up	Dihydrolipoyl dehydrogenase OS=Sus scrofa OX=9823 GN=DLD PE=1 SV=1	DLD	K00382	1	6.69026e-49	313.04	4	ALLNNSHYYHMAHGK(1)DFASR	0.81498	1.90275	1.34769	2.05746	0.18081	0.180116	0.331169
map00310 Lysine degradation	0.000360171	2.22	A0A5G2QPK6	135	K	2.712	0.0179189	Up	Dihydrolipoyl dehydrogenase OS=Sus scrofa OX=9823 GN=DLD PE=1 SV=1	DLD	K00382	1	2.83008e-140	407.16	3	SNAVK(1)ALTGGIAHLFK(1)QNK	-0.511	1.39969	1.94509	1.03871	0.37931	0.71524	0.52196
map00310 Lysine degradation	0.000360171	2.22	A0A5G2QPK6	409	K	4.416	0.00806848	Up	Dihydrolipoyl dehydrogenase OS=Sus scrofa OX=9823 GN=DLD PE=1 SV=1	DLD	K00382	1	9.81057e-41	315.21	2	EEGIEYK(1)VGK	0.0090722	1.65767	1.73328	1.50127	0.597975	0.312334	0.197473
map00310 Lysine degradation	0.000360171	2.22	A0A5G2QPK6	269	K	10.152	0.000750656	Up	Dihydrolipoyl dehydrogenase OS=Sus scrofa OX=9823 GN=DLD PE=1 SV=1	DLD	K00382	1	0.00021351	178.55	2	LNTK(1)VIGATK	-0.50256	1.41263	1.84138	2.20799	0.246217	0.175624	0.11616
map00310 Lysine degradation	0.000360171	2.22	A0A5G2QPK6	338	K	5.662	0.00569049	Up	Dihydrolipoyl dehydrogenase OS=Sus scrofa OX=9823 GN=DLD PE=1 SV=1	DLD	K00382	1	2.12613e-09	154.65	3	FQTK(1)IPNIYAIGDVVAGPMLAHK	-0.4543	1.04519	1.32725	2.7269	0.242605	0.311758	0.346298
map00310 Lysine degradation	0.000360171	2.22	A0A5G2QPK6	259	K	4.306	0.00171738	Up	Dihydrolipoyl dehydrogenase OS=Sus scrofa OX=9823 GN=DLD PE=1 SV=1	DLD	K00382	1	0.000942284	135.83	2	ILQK(1)QGFK(1)FK	-0.29711	1.38859	1.8666	1.61407	0.515362	0.282005	0.333363
map00310 Lysine degradation	0.000360171	2.22	A0A5G2QPK6	151	K	12.703	0.000528701	Up	Dihydrolipoyl dehydrogenase OS=Sus scrofa OX=9823 GN=DLD PE=1 SV=1	DLD	K00382	1	5.05413e-10	201.61	3	ITGK(1)NQVTATK(1)ADGSTEVINTK	0.16389	1.75435	1.80692	2.00089	0.222108	0.0946223	0.121115
map00310 Lysine degradation	0.000360171	2.22	A0A5G2QPK6	158	K	21.78	0.00019812	Up	Dihydrolipoyl dehydrogenase OS=Sus scrofa OX=9823 GN=DLD PE=1 SV=1	DLD	K00382	1	9.13913e-100	377.19	2	NQVTATK(1)ADGSTEVINTK	-0.156	1.61789	2.19801	1.92072	0.121481	0.0855181	0.0563852
map00310 Lysine degradation	0.000360171	2.22	A0A5G2QPK6	119	K	12.123	0.00472041	Up	Dihydrolipoyl dehydrogenase OS=Sus scrofa OX=9823 GN=DLD PE=1 SV=1	DLD	K00382	1	9.06167e-05	179.1	2	MMEQK(1)SNAVK	-0.32445	1.39617	0.839096	3.30751	0.181401	0.130613	0.145213
map00310 Lysine degradation	0.000360171	2.22	A0A5G2QPK6	124	K	11.949	0.0040856	Up	Dihydrolipoyl dehydrogenase OS=Sus scrofa OX=9823 GN=DLD PE=1 SV=1	DLD	K00382	1	1.49524e-09	167.14	3	SNAVK(1)ALTGGIAHLFK(1)QNK	-0.511	2.07125	0.955968	1.70857	0.123067	0.141145
map00310 Lysine degradation	0.000360171	2.22	A0A5G2QPK6	402	K	2.117	0.0256796	Up	Dihydrolipoyl dehydrogenase OS=Sus scrofa OX=9823 GN=DLD PE=1 SV=1	DLD	K00382	1	6.03025e-06	209.19	2	SEEQLK(1)EEGIEYK	0.28517	1.32037	1.83202	0.922558	0.625911	0.712405	0.586733
map00310 Lysine degradation	0.000360171	2.22	A0A5S6HDE4	231	K	2.576	0.00250875	Up	Hydroxyacyl-coenzyme A dehydrogenase, mitochondrial OS=Sus scrofa OX=9823 GN=HADH PE=1 SV=1	HADH	K00022	1	6.94408e-05	150.09	2	GDASK(1)EDIDTAMK	0.26145	1.5284	1.65931	1.1345	0.633765	0.559479	0.484542
map00310 Lysine degradation	0.000360171	2.22	A0A5S6HDE4	202	K	18.551	0.000642125	Up	Hydroxyacyl-coenzyme A dehydrogenase, mitochondrial OS=Sus scrofa OX=9823 GN=HADH PE=1 SV=1	HADH	K00022	1	2.6101e-135	417.7	3	HPVSCK(1)DTPGFIVNR	0.22751	2.15088	1.56223	1.97999	0.167468	0.0746803	0.0647446
map00310 Lysine degradation	0.000360171	2.22	A0A5S6HDE4	68	K	2.566	0.0197806	Up	Hydroxyacyl-coenzyme A dehydrogenase, mitochondrial OS=Sus scrofa OX=9823 GN=HADH PE=1 SV=1	HADH	K00022	1	0.00335906	129.56	2	K(1)GIEESLR	-0.2846	1.35863	1.55845	1.05167		0.614864	0.41638
map00310 Lysine degradation	0.000360171	2.22	A0A5S6HDE4	192	K	6.499	0.000761788	Up	Hydroxyacyl-coenzyme A dehydrogenase, mitochondrial OS=Sus scrofa OX=9823 GN=HADH PE=1 SV=1	HADH	K00022	1	3.51536e-06	201.6	2	TLESLVDFSK(1)TLGK	-0.3572	1.72206	1.91896	1.55885	0.375695	0.194467	0.229971
map00310 Lysine degradation	0.000360171	2.22	Q29554	262	K	7.157	0.000148423	Up	Trifunctional enzyme subunit alpha, mitochondrial OS=Sus scrofa OX=9823 GN=HADHA PE=2 SV=1	HADHA	K07515	1	0.0230026	111.39	2	DK(1)GLVEK	1.9227	1.50796	2.12247	1.63404	0.279951	0.203239	0.252339
map00310 Lysine degradation	0.000360171	2.22	Q29554	337	K	5.135	0.00990179	Up	Trifunctional enzyme subunit alpha, mitochondrial OS=Sus scrofa OX=9823 GN=HADHA PE=2 SV=1	HADHA	K07515	1	0.000273283	140.14	2	ESK(1)ALMGLYR	0.70982	1.50834	1.78929	1.72442	0.593777	0.169854	0.214311
map00310 Lysine degradation	0.000360171	2.22	Q29554	362	K	12.399	0.00224888	Up	Trifunctional enzyme subunit alpha, mitochondrial OS=Sus scrofa OX=9823 GN=HADHA PE=2 SV=1	HADHA	K07515	1	9.1233e-14	179.64	3	EVK(1)HLAILGAGLMGAGIAQVSVDK	-0.67277	1.6314	1.74674	2.17407	0.222383	0.160488	0.064918
map00310 Lysine degradation	0.000360171	2.22	Q29554	383	K	19.394	9.94043e-06	Up	Trifunctional enzyme subunit alpha, mitochondrial OS=Sus scrofa OX=9823 GN=HADHA PE=2 SV=1	HADHA	K07515	1	3.28254e-38	274.47	4	HLAILGAGLMGAGIAQVSVDK(1)HLK	-0.1212	2.12967	1.89821	1.67791	0.090733	0.114597	0.0888792
map00310 Lysine degradation	0.000360171	2.22	Q29554	644	K	15.327	0.0011441	Up	Trifunctional enzyme subunit alpha, mitochondrial OS=Sus scrofa OX=9823 GN=HADHA PE=2 SV=1	HADHA	K07515	1	8.86086e-20	266.58	2	GFYVYQEGVK(1)NR	0.60213	1.48671	2.30343	1.84236	0.198756	0.100973	0.067768
map00310 Lysine degradation	0.000360171	2.22	Q29554	411	K	11.934	0.000413425	Up	Trifunctional enzyme subunit alpha, mitochondrial OS=Sus scrofa OX=9823 GN=HADHA PE=2 SV=1	HADHA	K07515	1	1.50313e-28	286.45	3	GQQQVFK(1)GLNDK(1)VR	1.615	1.57651	2.0978	1.86178	0.219664	0.140402	0.103844
map00310 Lysine degradation	0.000360171	2.22	Q29554	309	K	9.663	0.00122596	Up	Trifunctional enzyme subunit alpha, mitochondrial OS=Sus scrofa OX=9823 GN=HADHA PE=2 SV=1	HADHA	K07515	1	5.4447e-28	256.9	3	IIDVVK(1)TGIEQGSDAGYLSESQK	-0.48788	1.59465	1.25306	2.5896	0.237413	0.19424	0.131039
map00310 Lysine degradation	0.000360171	2.22	Q29554	406	K	5.333	0.000909967	Up	Trifunctional enzyme subunit alpha, mitochondrial OS=Sus scrofa OX=9823 GN=HADHA PE=2 SV=1	HADHA	K07515	1	1.50313e-28	286.45	3	GQQQVFK(1)GLNDK(1)VR	1.615	1.48731	1.95748	1.60773	0.404543	0.222485	0.320456
map00310 Lysine degradation	0.000360171	2.22	Q29554	350	K	14.935	0.00147652	Up	Trifunctional enzyme subunit alpha, mitochondrial OS=Sus scrofa OX=9823 GN=HADHA PE=2 SV=1	HADHA	K07515	1	0.00182356	143.91	2	GQTLCK(1)K(1)NK	-0.2853	1.30268	1.99373	2.32706	0.21086	0.0863472	0.0793269
map00310 Lysine degradation	0.000360171	2.22	Q29554	351	K	14.935	0.00147652	Up	Trifunctional enzyme subunit alpha, mitochondrial OS=Sus scrofa OX=9823 GN=HADHA PE=2 SV=1	HADHA	K07515	1	0.00182356	143.91	2	GQTLCK(1)K(1)NK	-0.2853	1.30268	1.99373	2.32706	0.21086	0.0863472	0.0793269
map00310 Lysine degradation	0.000360171	2.22	Q29554	386	K	12.376	0.0015873	Up	Trifunctional enzyme subunit alpha, mitochondrial OS=Sus scrofa OX=9823 GN=HADHA PE=2 SV=1	HADHA	K07515	1	0.0143054	129.47	2	HLK(1)TILK	-0.23222	1.92691	1.70284	1.92167	0.239517	0.0732694	0.135795
map00310 Lysine degradation	0.000360171	2.22	Q29554	569	K	6.484	0.000221604	Up	Trifunctional enzyme subunit alpha, mitochondrial OS=Sus scrofa OX=9823 GN=HADHA PE=2 SV=1	HADHA	K07515	1	6.69682e-05	145.17	2	ILQEGVGPK(1)K	-0.45387	1.48643	2.22279	1.4891	0.264961	0.295403	0.241316
map00310 Lysine degradation	0.000360171	2.22	Q29554	415	K	5.846	0.000430241	Up	Trifunctional enzyme subunit alpha, mitochondrial OS=Sus scrofa OX=9823 GN=HADHA PE=2 SV=1	HADHA	K07515	1	0.0156839	109.71	2	K(1)K(1)ALTSFER	0.00556	1.54473	1.83478	1.74407	0.387967	0.259421	0.22904
map00310 Lysine degradation	0.000360171	2.22	Q29554	414	K	6.775	0.000281527	Up	Trifunctional enzyme subunit alpha, mitochondrial OS=Sus scrofa OX=9823 GN=HADHA PE=2 SV=1	HADHA	K07515	1	0.0196487	109.71	2	K(1)K(1)ALTSFER	0.00556	1.58979	1.87795	1.76058	0.3357	0.237865	0.198115
map00310 Lysine degradation	0.000360171	2.22	Q29554	597	K	49.862	0.000225682	Up	Trifunctional enzyme subunit alpha, mitochondrial OS=Sus scrofa OX=9823 GN=HADHA PE=2 SV=1	HADHA	K07515	1	1.99798e-98	345.79	4	LDSLTTSFGFPVGAATLMDEVGMDVAK(1)HVAENLGK	0.19193	1.33536	2.20761	2.33906	0.0270586	0.0610966	0.0298099
map00310 Lysine degradation	0.000360171	2.22	Q29554	214	K	8.368	0.0165153	Up	Trifunctional enzyme subunit alpha, mitochondrial OS=Sus scrofa OX=9823 GN=HADHA PE=2 SV=1	HADHA	K07515	1	0.000150662	100.08	3	K(1)MGLVDQLVEPLGPGLKPPEER	-0.76534	1.29578	2.1035	1.23176		0.275297	0.0936636
map00310 Lysine degradation	0.000360171	2.22	Q29554	292	K	7.381	9.84506e-05	Up	Trifunctional enzyme subunit alpha, mitochondrial OS=Sus scrofa OX=9823 GN=HADHA PE=2 SV=1	HADHA	K07515	1	1.84032e-12	234.92	2	K(1)QTK(1)GLYPAPLK	-0.034596	1.4069	1.90507	1.97215	0.272319	0.225776	0.217793
map00310 Lysine degradation	0.000360171	2.22	Q29554	295	K	7.591	0.00013527	Up	Trifunctional enzyme subunit alpha, mitochondrial OS=Sus scrofa OX=9823 GN=HADHA PE=2 SV=1	HADHA	K07515	1	1.84032e-12	234.92	2	QTK(1)GLYPAPLK(1)IIDVVK	0.38096	1.32944	2.05122	1.92096	0.245202	0.217096	0.236093
map00310 Lysine degradation	0.000360171	2.22	Q29554	634	K	6.425	0.011437	Up	Trifunctional enzyme subunit alpha, mitochondrial OS=Sus scrofa OX=9823 GN=HADHA PE=2 SV=1	HADHA	K07515	1	5.26918e-05	156.01	2	SGK(1)GFYVYQEGVK	0.6105	1.04396	1.88455	2.26345	0.490762	0.16206	0.155214
map00310 Lysine degradation	0.000360171	2.22	Q29554	285	K	23.805	0.00153919	Up	Trifunctional enzyme subunit alpha, mitochondrial OS=Sus scrofa OX=9823 GN=HADHA PE=2 SV=1	HADHA	K07515	1	0.00173611	188.81	2	K(1)VEEK(1)VR	-1.2912	1.59953	1.42516	1.83909	0.0920056	0.044207
map00310 Lysine degradation	0.000360171	2.22	Q29554	289	K	23.805	0.00153919	Up	Trifunctional enzyme subunit alpha, mitochondrial OS=Sus scrofa OX=9823 GN=HADHA PE=2 SV=1	HADHA	K07515	1	0.00173611	188.81	2	K(1)VEEK(1)VR	-1.2912	1.59953	1.42516	1.83909	0.0920056	0.044207
map00310 Lysine degradation	0.000360171	2.22	Q29554	735	K	3.491	0.0118892	Up	Trifunctional enzyme subunit alpha, mitochondrial OS=Sus scrofa OX=9823 GN=HADHA PE=2 SV=1	HADHA	K07515	1	0.0119138	104.06	2	K(1)YEAIYGK	0.26186	1.23405	2.03733	1.39269	0.638898	0.430363	0.266668
map00310 Lysine degradation	0.000360171	2.22	Q29554	742	K	7.604	0.0174953	Up	Trifunctional enzyme subunit alpha, mitochondrial OS=Sus scrofa OX=9823 GN=HADHA PE=2 SV=1	HADHA	K07515	1	3.33074e-56	310.9	3	YEAIYGK(1)QFTPCQLLIDHASSPNK	-0.40933	2.1914	0.973562	2.13768	0.472701	0.137778	0.0868798
map00310 Lysine degradation	0.000360171	2.22	Q29554	534	K	4.968	0.000506262	Up	Trifunctional enzyme subunit alpha, mitochondrial OS=Sus scrofa OX=9823 GN=HADHA PE=2 SV=1	HADHA	K07515	1	0.00874134	105.14	2	QGK(1)VIIVVK	0.043046	1.36823	1.52781	2.09859	0.391651	0.323143	0.290575
map00310 Lysine degradation	0.000360171	2.22	Q29554	540	K	14.449	0.000158613	Up	Trifunctional enzyme subunit alpha, mitochondrial OS=Sus scrofa OX=9823 GN=HADHA PE=2 SV=1	HADHA	K07515	1	7.99001e-16	250.94	2	VIIVVK(1)DGPGFYTTR	-0.12074	1.60044	2.05039	1.96079	0.178844	0.100987	0.108549
map00310 Lysine degradation	0.000360171	2.22	Q29554	625	K	7.608	0.00111284	Up	Trifunctional enzyme subunit alpha, mitochondrial OS=Sus scrofa OX=9823 GN=HADHA PE=2 SV=1	HADHA	K07515	1	0.0025854	118.5	2	QMISK(1)GFLGR	-0.27704	1.1603	1.70591	2.43674	0.275322	0.229837	0.191894
map00310 Lysine degradation	0.000360171	2.22	Q29554	505	K	6.295	0.000205172	Up	Trifunctional enzyme subunit alpha, mitochondrial OS=Sus scrofa OX=9823 GN=HADHA PE=2 SV=1	HADHA	K07515	1	1.51822e-08	153.88	3	VIGMHYFSPVDK(1)MQLLEIITTEK(1)TSK	-0.39814	1.33542	1.74453	2.09761	0.265787	0.302348	0.254302
map00310 Lysine degradation	0.000360171	2.22	Q29554	46	K	8.052	0.000393129	Up	Trifunctional enzyme subunit alpha, mitochondrial OS=Sus scrofa OX=9823 GN=HADHA PE=2 SV=1	HADHA	K07515	1	3.54276e-40	307.15	3	THINYGVK(1)GDVAVIR	-0.22291	1.61211	1.97531	1.74975	0.298486	0.205942	0.158402
map00310 Lysine degradation	0.000360171	2.22	Q29554	249	K	26.732	0.000913743	Up	Trifunctional enzyme subunit alpha, mitochondrial OS=Sus scrofa OX=9823 GN=HADHA PE=2 SV=1	HADHA	K07515	1	1.15063e-11	195.1	2	TIEYLEEVAVTFAK(1)GLADK	0.45096	1.91777	1.70262	1.25795	0.0458436		0.0758183
map00330 Arginine and proline metabolism	0.0394046	1.8	A0A287ADK3	409	K	17.969	0.0215392	Up	Aldehyde dehydrogenase (NAD(+)) OS=Sus scrofa OX=9823 GN=ALDH7A1 PE=1 SV=1	ALDH7A1	K14085	1	5.53261e-40	301.93	3	FK(1)NEDEVFAWNNEVK	-0.20014	1.56962	0.998956	2.25255	0.152374	0.0264957
map00330 Arginine and proline metabolism	0.0394046	1.8	A0A287ADK3	322	K	11.332	0.000279857	Up	Aldehyde dehydrogenase (NAD(+)) OS=Sus scrofa OX=9823 GN=ALDH7A1 PE=1 SV=1	ALDH7A1	K14085	1	0.00984518	102.95	2	LTK(1)AYAQIR	-0.33877	1.5294	2.12202	1.86203	0.224637	0.125655	0.136265
map00330 Arginine and proline metabolism	0.0394046	1.8	F1SDP3	386	K	8.259	0.000759347	Up	Ornithine--oxo-acid aminotransferase OS=Sus scrofa OX=9823 GN=OAT PE=1 SV=1	OAT	K00819	1	0.00780743	107.69	2	ETK(1)DYDAWK	2.0124	1.39692	1.90862	1.32102		0.188119	0.185328
map00330 Arginine and proline metabolism	0.0394046	1.8	F1SDP3	374	K	8.834	0.0014252	Up	Ornithine--oxo-acid aminotransferase OS=Sus scrofa OX=9823 GN=OAT PE=1 SV=1	OAT	K00819	1	0.00262914	114.39	2	GK(1)GLLNAIVIR	0.26321	1.6876	1.26714	2.43515	0.289764	0.146662	0.173688
map00330 Arginine and proline metabolism	0.0394046	1.8	F1SDP3	66	K	9.737	0.000244457	Up	Ornithine--oxo-acid aminotransferase OS=Sus scrofa OX=9823 GN=OAT PE=1 SV=1	OAT	K00819	1	8.22479e-05	146.17	2	GK(1)GVYVWDVEGR	-1.5302	1.90029	1.42554	2.11535	0.235097	0.143977	0.179746
map00330 Arginine and proline metabolism	0.0394046	1.8	P00506	90	K	27.053	0.000878985	Up	Aspartate aminotransferase, mitochondrial OS=Sus scrofa OX=9823 GN=GOT2 PE=1 SV=2	GOT2	K14455	1	1.28758e-38	315.59	2	K(1)AEAQIAAK(1)NLDK	-0.28283	1.73603	1.80514	2.24496	0.126186	0.0526204	0.0350725
map00330 Arginine and proline metabolism	0.0394046	1.8	P00506	122	K	4.877	0.0126835	Up	Aspartate aminotransferase, mitochondrial OS=Sus scrofa OX=9823 GN=GOT2 PE=1 SV=2	GOT2	K14455	1	4.4751e-100	385.31	2	ASAELALGENNEVLK(1)SGR	-0.26663	1.24871	1.6234	2.1069	0.602666	0.178371	0.239957
map00330 Arginine and proline metabolism	0.0394046	1.8	P00506	73	K	4.807	0.0021095	Up	Aspartate aminotransferase, mitochondrial OS=Sus scrofa OX=9823 GN=GOT2 PE=1 SV=2	GOT2	K14455	1	0.00311676	112.13	2	DDNGK(1)PYVLPSVR	-0.24733	1.52005	1.67046	1.77625	0.371542	0.21292	0.448776
map00330 Arginine and proline metabolism	0.0394046	1.8	P00506	159	K	27.652	0.00017082	Up	Aspartate aminotransferase, mitochondrial OS=Sus scrofa OX=9823 GN=GOT2 PE=1 SV=2	GOT2	K14455	1	2.28188e-25	259.7	2	DVFLPK(1)PSWGNHTPIFR	-0.14649	2.4752	1.57385	1.74154	0.08588	0.0787644	0.0447638
map00330 Arginine and proline metabolism	0.0394046	1.8	P00506	404	K	13.671	0.00011086	Up	Aspartate aminotransferase, mitochondrial OS=Sus scrofa OX=9823 GN=GOT2 PE=1 SV=2	GOT2	K14455	1	3.9735e-05	205.09	2	EFSIYMTK(1)DGR	-0.40074	1.99297	1.75064	1.84742	0.185849	0.11365	0.10947
map00330 Arginine and proline metabolism	0.0394046	1.8	P00506	234	K	11.05	0.000617036	Up	Aspartate aminotransferase, mitochondrial OS=Sus scrofa OX=9823 GN=GOT2 PE=1 SV=2	GOT2	K14455	1	1.70945e-06	93.437	5	IPAQSVILLHACAHNPTGVDPRPEQWK(1)EMATLVK(1)K	-0.28561	1.64881	2.15028	1.70299	0.247217	0.139063	0.111637
map00330 Arginine and proline metabolism	0.0394046	1.8	P00506	279	K	32.497	0.000531278	Up	Aspartate aminotransferase, mitochondrial OS=Sus scrofa OX=9823 GN=GOT2 PE=1 SV=2	GOT2	K14455	1	3.08668e-46	282.05	3	HFIEQGINVCLCQSYAK(1)NMGLYGER	-0.21123	1.75921	1.28562	1.85466		0.0609308	0.0395821
map00330 Arginine and proline metabolism	0.0394046	1.8	P00506	345	K	8.513	0.00572542	Up	Aspartate aminotransferase, mitochondrial OS=Sus scrofa OX=9823 GN=GOT2 PE=1 SV=2	GOT2	K14455	1	8.52894e-05	179.19	3	QQWLQEVK(1)GMADR	-0.49791	1.41017	1.98195	1.24477	0.239821		0.123294
map00330 Arginine and proline metabolism	0.0394046	1.8	P00506	309	K	10.969	0.000213193	Up	Aspartate aminotransferase, mitochondrial OS=Sus scrofa OX=9823 GN=GOT2 PE=1 SV=2	GOT2	K14455	1	1.53243e-05	207.29	2	VESQLK(1)ILIR	0.4788	1.91308	1.91324	1.67237	0.228165	0.121864	0.151283
map00330 Arginine and proline metabolism	0.0394046	1.8	P00506	296	K	13.166	0.000619756	Up	Aspartate aminotransferase, mitochondrial OS=Sus scrofa OX=9823 GN=GOT2 PE=1 SV=2	GOT2	K14455	1	4.3194e-07	196.67	3	VGAFTVVCK(1)DAEEAK(1)R	0.22048	1.47011	1.86087	2.24548	0.212591	0.0968385	0.114108
map00330 Arginine and proline metabolism	0.0394046	1.8	P00506	185	K	7.392	0.000898733	Up	Aspartate aminotransferase, mitochondrial OS=Sus scrofa OX=9823 GN=GOT2 PE=1 SV=2	GOT2	K14455	1	1.17093e-17	213.49	2	YYDPK(1)TCGFDFTGALEDISK	1.4659	1.89835	1.72845	1.65824	0.351514	0.164186	0.199257
map00330 Arginine and proline metabolism	0.0394046	1.8	Q2XQV4	432	K	9.995	0.00100617	Up	Aldehyde dehydrogenase, mitochondrial OS=Sus scrofa OX=9823 GN=ALDH2 PE=2 SV=1	ALDH2	K00128	1	0.000171453	152.34	2	FK(1)TIEEVIGR	0.50264	1.99671	2.16627	1.29131	0.17112	0.119906	0.254688
map00330 Arginine and proline metabolism	0.0394046	1.8	Q2XQV4	379	K	12.974	0.00838091	Up	Aldehyde dehydrogenase, mitochondrial OS=Sus scrofa OX=9823 GN=ALDH2 PE=2 SV=1	ALDH2	K00128	1	0.0325645	76.827	2	ILGYIK(1)SGK	-0.12652	1.15901	1.47018	2.12645	0.176825		0.0675384
map00330 Arginine and proline metabolism	0.0394046	1.8	Q2XQV4	372	K	9.488	0.00431005	Up	Aldehyde dehydrogenase, mitochondrial OS=Sus scrofa OX=9823 GN=ALDH2 PE=2 SV=1	ALDH2	K00128	1	2.41837e-50	323.66	3	TEQGPQIDETQFK(1)K	-0.047026	1.28049	2.31628	1.83114	0.340705	0.103428	0.127952
map00330 Arginine and proline metabolism	0.0394046	1.8	Q2XQV4	280	K	23.305	0.000824426	Up	Aldehyde dehydrogenase, mitochondrial OS=Sus scrofa OX=9823 GN=ALDH2 PE=2 SV=1	ALDH2	K00128	1	7.71847e-125	406.71	2	VAFTGSTEVGHLIQVAAGK(1)SNLK	-0.42648	1.48516	2.13671	1.23907	0.078186	0.0608686
map00330 Arginine and proline metabolism	0.0394046	1.8	Q2XQV4	159	K	13.142	0.0225955	Up	Aldehyde dehydrogenase, mitochondrial OS=Sus scrofa OX=9823 GN=ALDH2 PE=2 SV=1	ALDH2	K00128	1	0.000621756	134.59	2	YYAGWADK(1)YHGK	-1.8788	0.940432	0.941935	2.87624	0.170285	0.0711114
map00330 Arginine and proline metabolism	0.0394046	1.8	A0A5G2QUP3	104	K	11.874	0.00281841	Up	Amine oxidase OS=Sus scrofa OX=9823 GN=MAOA PE=1 SV=1	MAOA	K00274	1	0.0230777	111.28	2	GK(1)SYPFR	1.314	1.28933	1.30584	2.93877	0.238517	0.0993524	0.12819
map00330 Arginine and proline metabolism	0.0394046	1.8	A0A5G2QUP3	168	K	9.843	0.00169033	Up	Amine oxidase OS=Sus scrofa OX=9823 GN=MAOA PE=1 SV=1	MAOA	K00274	1	0.0116435	110.81	2	ICWTK(1)TAK	0.031118	1.43424	1.19829	2.0503		0.168682	0.14849
map00330 Arginine and proline metabolism	0.0394046	1.8	A0A5G2QUP3	136	K	6.376	0.00644752	Up	Amine oxidase OS=Sus scrofa OX=9823 GN=MAOA PE=1 SV=1	MAOA	K00274	1	0.0255059	85.064	2	TMDDMGK(1)K	-0.89681	1.36682	1.29994	1.85995	0.309233	0.164056
map00330 Arginine and proline metabolism	0.0394046	1.8	Q29594	304	K	4.904	0.0439558	Up	Creatine kinase B-type OS=Sus scrofa OX=9823 GN=CKB PE=2 SV=2	CKB	K00933	1	0.00268633	97.277	3	LPHLGK(1)HEK	0.87548	1.21619	1.001	2.18449	0.444099		0.154221
map00330 Arginine and proline metabolism	0.0394046	1.8	F1SA26	66	K	8.108	0.000895461	Up	Arginase OS=Sus scrofa OX=9823 GN=ARG2 PE=3 SV=1	ARG2	K01476	1	2.47601e-08	157.73	3	LSDLGCHLK(1)DFGDLSFTPVPK	0.13971	1.46262	1.89479	1.26271		0.195978	0.183907
map00330 Arginine and proline metabolism	0.0394046	1.8	I3LNB4	192	K	9.69	0.00855633	Up	Multifunctional fusion protein OS=Sus scrofa OX=9823 GN=ALDH4A1 PE=1 SV=3	ALDH4A1	K00294	1	3.92338e-05	180.61	2	RAEILAK(1)TMVGQGK	-0.60394	1.3299	1.42318	2.68566	0.354019	0.131491	0.0757495
map00330 Arginine and proline metabolism	0.0394046	1.8	I3LNB4	145	K	9.736	0.00128285	Up	Multifunctional fusion protein OS=Sus scrofa OX=9823 GN=ALDH4A1 PE=1 SV=3	ALDH4A1	K00294	1	9.39689e-05	200.11	3	VAK(1)FCYADK(1)ALLHR	-0.53984	1.29682	1.8763	2.26801	0.276073	0.125663	0.157128
map00330 Arginine and proline metabolism	0.0394046	1.8	I3LNB4	342	K	4.411	2.63564e-05	Up	Multifunctional fusion protein OS=Sus scrofa OX=9823 GN=ALDH4A1 PE=1 SV=3	ALDH4A1	K00294	1	2.85446e-05	138.77	3	HLWK(1)QVAQNLDHFR	1.0309	1.40632	1.46411	1.47304	0.315807	0.340721
map00330 Arginine and proline metabolism	0.0394046	1.8	I3LNB4	422	K	8.681	0.0110099	Up	Multifunctional fusion protein OS=Sus scrofa OX=9823 GN=ALDH4A1 PE=1 SV=3	ALDH4A1	K00294	1	1.71804e-07	155.22	2	IK(1)VGDPAEDFGTFFSAVIDAK	0.53449	1.24266	1.19122	2.20952	0.244668	0.111927
map00330 Arginine and proline metabolism	0.0394046	1.8	I3LNB4	448	K	11.509	0.000187342	Up	Multifunctional fusion protein OS=Sus scrofa OX=9823 GN=ALDH4A1 PE=1 SV=3	ALDH4A1	K00294	1	0.0095833	149.4	2	K(1)WLEHAR	-0.22059	1.61145	1.77872	2.13016	0.204722	0.115026	0.159919
map00330 Arginine and proline metabolism	0.0394046	1.8	I3LNB4	364	K	20.487	0.00352003	Up	Multifunctional fusion protein OS=Sus scrofa OX=9823 GN=ALDH4A1 PE=1 SV=3	ALDH4A1	K00294	1	5.2846e-07	144.27	4	LAGECGGK(1)NFHFVHR	0.31744	1.31589	1.04741	2.47913		0.0908397	0.0667358
map00330 Arginine and proline metabolism	0.0394046	1.8	I3LNB4	411	K	11.318	0.0277806	Up	Multifunctional fusion protein OS=Sus scrofa OX=9823 GN=ALDH4A1 PE=1 SV=3	ALDH4A1	K00294	1	2.97561e-05	152.04	2	LYVPGSLWPQIK(1)GR	-0.060728		1.74335	1.93192	0.227452		0.0972815
map00330 Arginine and proline metabolism	0.0394046	1.8	I3LNB4	139	K	15.295	0.000459346	Up	Multifunctional fusion protein OS=Sus scrofa OX=9823 GN=ALDH4A1 PE=1 SV=3	ALDH4A1	K00294	1	0.00170069	136.17	4	YQVSPFNHGHK(1)VAK(1)FCYADK	0.64028	1.31413	1.64291	1.83413	0.0902648		0.118564
map00330 Arginine and proline metabolism	0.0394046	1.8	I3LNB4	136	K	10.105	0.00733966	Up	Multifunctional fusion protein OS=Sus scrofa OX=9823 GN=ALDH4A1 PE=1 SV=3	ALDH4A1	K00294	1	0.000213983	119.39	4	YQVSPFNHGHK(1)VAK(1)FCYADK	0.64028	1.69171	1.72391	2.04406	0.0591214	0.143857	0.337339
map00330 Arginine and proline metabolism	0.0394046	1.8	P28839	476	K	11.966	0.00150163	Up	Cytosol aminopeptidase OS=Sus scrofa OX=9823 GN=LAP3 PE=1 SV=2	LAP3	K11142	1	6.65421e-62	296.22	3	EFVTHPK(1)WAHLDIAGVMTNK(1)DEVPYLR	-0.48689	1.53317	2.16315	1.84092	0.261122	0.104831	0.0968094
map00330 Arginine and proline metabolism	0.0394046	1.8	P28839	489	K	37.952	0.000766915	Up	Cytosol aminopeptidase OS=Sus scrofa OX=9823 GN=LAP3 PE=1 SV=2	LAP3	K11142	1	1.39009e-122	401.82	3	WAHLDIAGVMTNK(1)DEVPYLR	1.6921	2.83638	1.47937	1.53021	0.0843662	0.0259332	0.043735
map00330 Arginine and proline metabolism	0.0394046	1.8	P28839	221	K	3.592	0.0100548	Up	Cytosol aminopeptidase OS=Sus scrofa OX=9823 GN=LAP3 PE=1 SV=2	LAP3	K11142	1	0.000578555	162.49	2	FAEVIEK(1)NLK	0.31197	1.27914	1.93468	1.47968	0.684927	0.297974	0.3236
map00330 Arginine and proline metabolism	0.0394046	1.8	P28839	237	K	14.908	0.00875425	Up	Cytosol aminopeptidase OS=Sus scrofa OX=9823 GN=LAP3 PE=1 SV=2	LAP3	K11142	1	1.68627e-43	300.51	4	TDVHIRPK(1)SWIEEQEMGSFLSVAK	1.0962	1.14748	1.52908	2.10942	0.159311	0.0547131
map00330 Arginine and proline metabolism	0.0394046	1.8	P28839	229	K	13.562	0.00988313	Up	Cytosol aminopeptidase OS=Sus scrofa OX=9823 GN=LAP3 PE=1 SV=2	LAP3	K11142	1	9.98912e-38	309.89	2	SASSK(1)TDVHIRPK	-0.08782		1.40819	2.31712	0.146759		0.127931
map00340 Histidine metabolism	0.378978	1.56	A0A287ADK3	409	K	17.969	0.0215392	Up	Aldehyde dehydrogenase (NAD(+)) OS=Sus scrofa OX=9823 GN=ALDH7A1 PE=1 SV=1	ALDH7A1	K14085	1	5.53261e-40	301.93	3	FK(1)NEDEVFAWNNEVK	-0.20014	1.56962	0.998956	2.25255	0.152374	0.0264957
map00340 Histidine metabolism	0.378978	1.56	A0A287ADK3	322	K	11.332	0.000279857	Up	Aldehyde dehydrogenase (NAD(+)) OS=Sus scrofa OX=9823 GN=ALDH7A1 PE=1 SV=1	ALDH7A1	K14085	1	0.00984518	102.95	2	LTK(1)AYAQIR	-0.33877	1.5294	2.12202	1.86203	0.224637	0.125655	0.136265
map00340 Histidine metabolism	0.378978	1.56	Q2XQV4	432	K	9.995	0.00100617	Up	Aldehyde dehydrogenase, mitochondrial OS=Sus scrofa OX=9823 GN=ALDH2 PE=2 SV=1	ALDH2	K00128	1	0.000171453	152.34	2	FK(1)TIEEVIGR	0.50264	1.99671	2.16627	1.29131	0.17112	0.119906	0.254688
map00340 Histidine metabolism	0.378978	1.56	Q2XQV4	379	K	12.974	0.00838091	Up	Aldehyde dehydrogenase, mitochondrial OS=Sus scrofa OX=9823 GN=ALDH2 PE=2 SV=1	ALDH2	K00128	1	0.0325645	76.827	2	ILGYIK(1)SGK	-0.12652	1.15901	1.47018	2.12645	0.176825		0.0675384
map00340 Histidine metabolism	0.378978	1.56	Q2XQV4	372	K	9.488	0.00431005	Up	Aldehyde dehydrogenase, mitochondrial OS=Sus scrofa OX=9823 GN=ALDH2 PE=2 SV=1	ALDH2	K00128	1	2.41837e-50	323.66	3	TEQGPQIDETQFK(1)K	-0.047026	1.28049	2.31628	1.83114	0.340705	0.103428	0.127952
map00340 Histidine metabolism	0.378978	1.56	Q2XQV4	280	K	23.305	0.000824426	Up	Aldehyde dehydrogenase, mitochondrial OS=Sus scrofa OX=9823 GN=ALDH2 PE=2 SV=1	ALDH2	K00128	1	7.71847e-125	406.71	2	VAFTGSTEVGHLIQVAAGK(1)SNLK	-0.42648	1.48516	2.13671	1.23907	0.078186	0.0608686
map00340 Histidine metabolism	0.378978	1.56	Q2XQV4	159	K	13.142	0.0225955	Up	Aldehyde dehydrogenase, mitochondrial OS=Sus scrofa OX=9823 GN=ALDH2 PE=2 SV=1	ALDH2	K00128	1	0.000621756	134.59	2	YYAGWADK(1)YHGK	-1.8788	0.940432	0.941935	2.87624	0.170285	0.0711114
map00340 Histidine metabolism	0.378978	1.56	A0A5G2QUP3	104	K	11.874	0.00281841	Up	Amine oxidase OS=Sus scrofa OX=9823 GN=MAOA PE=1 SV=1	MAOA	K00274	1	0.0230777	111.28	2	GK(1)SYPFR	1.314	1.28933	1.30584	2.93877	0.238517	0.0993524	0.12819
map00340 Histidine metabolism	0.378978	1.56	A0A5G2QUP3	168	K	9.843	0.00169033	Up	Amine oxidase OS=Sus scrofa OX=9823 GN=MAOA PE=1 SV=1	MAOA	K00274	1	0.0116435	110.81	2	ICWTK(1)TAK	0.031118	1.43424	1.19829	2.0503		0.168682	0.14849
map00340 Histidine metabolism	0.378978	1.56	A0A5G2QUP3	136	K	6.376	0.00644752	Up	Amine oxidase OS=Sus scrofa OX=9823 GN=MAOA PE=1 SV=1	MAOA	K00274	1	0.0255059	85.064	2	TMDDMGK(1)K	-0.89681	1.36682	1.29994	1.85995	0.309233	0.164056
map00350 Tyrosine metabolism	0.317375	1.44	A0A287BPT0	195	K	2.4	0.0233365	Up	Amine oxidase OS=Sus scrofa OX=9823 GN=IL4I1 PE=1 SV=1	IL4I1	K03334	1	1.68098e-05	214.05	2	ALEDLK(1)TLGCR	0.51981	1.20217	1.15474	1.87817	0.831458	0.485994	0.447469
map00350 Tyrosine metabolism	0.317375	1.44	A0A287BPT0	354	K	10.856	0.00445141	Up	Amine oxidase OS=Sus scrofa OX=9823 GN=IL4I1 PE=1 SV=1	IL4I1	K03334	1	2.01115e-06	149.69	2	ALHYLPATK(1)VFLSFR	0.0098332	1.52372	1.25617	2.71404	0.183979	0.0760498	0.24604
map00350 Tyrosine metabolism	0.317375	1.44	A0A287BPT0	500	K	5.137	0.0203042	Up	Amine oxidase OS=Sus scrofa OX=9823 GN=IL4I1 PE=1 SV=1	IL4I1	K03334	1	2.50728e-38	263.71	3	IYFAGEHTAFPHGWVETAVK(1)SALR	0.26822	1.1991	1.04709	2.77616	0.513719	0.291314	0.172616
map00350 Tyrosine metabolism	0.317375	1.44	A0A287BPT0	442	K	6.095	0.00897975	Up	Amine oxidase OS=Sus scrofa OX=9823 GN=IL4I1 PE=1 SV=1	IL4I1	K03334	1	0.000402054	190.51	2	LWDGSGVIK(1)R	-0.021554	1.68127	1.17312	2.29994	0.487875	0.205652	0.152136
map00350 Tyrosine metabolism	0.317375	1.44	A0A5G2QES7	99	K	3.086	0.0307178	Up	S-(hydroxymethyl)glutathione dehydrogenase OS=Sus scrofa OX=9823 GN=ADH5 PE=1 SV=1	ADH5	K00121	1	0.00314749	114.5	2	FCLNPK(1)TNLCQK	-1.2218	1.13829	1.12488	2.26838	0.75765	0.390613	0.32019
map00350 Tyrosine metabolism	0.317375	1.44	P00506	90	K	27.053	0.000878985	Up	Aspartate aminotransferase, mitochondrial OS=Sus scrofa OX=9823 GN=GOT2 PE=1 SV=2	GOT2	K14455	1	1.28758e-38	315.59	2	K(1)AEAQIAAK(1)NLDK	-0.28283	1.73603	1.80514	2.24496	0.126186	0.0526204	0.0350725
map00350 Tyrosine metabolism	0.317375	1.44	P00506	122	K	4.877	0.0126835	Up	Aspartate aminotransferase, mitochondrial OS=Sus scrofa OX=9823 GN=GOT2 PE=1 SV=2	GOT2	K14455	1	4.4751e-100	385.31	2	ASAELALGENNEVLK(1)SGR	-0.26663	1.24871	1.6234	2.1069	0.602666	0.178371	0.239957
map00350 Tyrosine metabolism	0.317375	1.44	P00506	73	K	4.807	0.0021095	Up	Aspartate aminotransferase, mitochondrial OS=Sus scrofa OX=9823 GN=GOT2 PE=1 SV=2	GOT2	K14455	1	0.00311676	112.13	2	DDNGK(1)PYVLPSVR	-0.24733	1.52005	1.67046	1.77625	0.371542	0.21292	0.448776
map00350 Tyrosine metabolism	0.317375	1.44	P00506	159	K	27.652	0.00017082	Up	Aspartate aminotransferase, mitochondrial OS=Sus scrofa OX=9823 GN=GOT2 PE=1 SV=2	GOT2	K14455	1	2.28188e-25	259.7	2	DVFLPK(1)PSWGNHTPIFR	-0.14649	2.4752	1.57385	1.74154	0.08588	0.0787644	0.0447638
map00350 Tyrosine metabolism	0.317375	1.44	P00506	404	K	13.671	0.00011086	Up	Aspartate aminotransferase, mitochondrial OS=Sus scrofa OX=9823 GN=GOT2 PE=1 SV=2	GOT2	K14455	1	3.9735e-05	205.09	2	EFSIYMTK(1)DGR	-0.40074	1.99297	1.75064	1.84742	0.185849	0.11365	0.10947
map00350 Tyrosine metabolism	0.317375	1.44	P00506	234	K	11.05	0.000617036	Up	Aspartate aminotransferase, mitochondrial OS=Sus scrofa OX=9823 GN=GOT2 PE=1 SV=2	GOT2	K14455	1	1.70945e-06	93.437	5	IPAQSVILLHACAHNPTGVDPRPEQWK(1)EMATLVK(1)K	-0.28561	1.64881	2.15028	1.70299	0.247217	0.139063	0.111637
map00350 Tyrosine metabolism	0.317375	1.44	P00506	279	K	32.497	0.000531278	Up	Aspartate aminotransferase, mitochondrial OS=Sus scrofa OX=9823 GN=GOT2 PE=1 SV=2	GOT2	K14455	1	3.08668e-46	282.05	3	HFIEQGINVCLCQSYAK(1)NMGLYGER	-0.21123	1.75921	1.28562	1.85466		0.0609308	0.0395821
map00350 Tyrosine metabolism	0.317375	1.44	P00506	345	K	8.513	0.00572542	Up	Aspartate aminotransferase, mitochondrial OS=Sus scrofa OX=9823 GN=GOT2 PE=1 SV=2	GOT2	K14455	1	8.52894e-05	179.19	3	QQWLQEVK(1)GMADR	-0.49791	1.41017	1.98195	1.24477	0.239821		0.123294
map00350 Tyrosine metabolism	0.317375	1.44	P00506	309	K	10.969	0.000213193	Up	Aspartate aminotransferase, mitochondrial OS=Sus scrofa OX=9823 GN=GOT2 PE=1 SV=2	GOT2	K14455	1	1.53243e-05	207.29	2	VESQLK(1)ILIR	0.4788	1.91308	1.91324	1.67237	0.228165	0.121864	0.151283
map00350 Tyrosine metabolism	0.317375	1.44	P00506	296	K	13.166	0.000619756	Up	Aspartate aminotransferase, mitochondrial OS=Sus scrofa OX=9823 GN=GOT2 PE=1 SV=2	GOT2	K14455	1	4.3194e-07	196.67	3	VGAFTVVCK(1)DAEEAK(1)R	0.22048	1.47011	1.86087	2.24548	0.212591	0.0968385	0.114108
map00350 Tyrosine metabolism	0.317375	1.44	P00506	185	K	7.392	0.000898733	Up	Aspartate aminotransferase, mitochondrial OS=Sus scrofa OX=9823 GN=GOT2 PE=1 SV=2	GOT2	K14455	1	1.17093e-17	213.49	2	YYDPK(1)TCGFDFTGALEDISK	1.4659	1.89835	1.72845	1.65824	0.351514	0.164186	0.199257
map00350 Tyrosine metabolism	0.317375	1.44	A0A5G2QUP3	104	K	11.874	0.00281841	Up	Amine oxidase OS=Sus scrofa OX=9823 GN=MAOA PE=1 SV=1	MAOA	K00274	1	0.0230777	111.28	2	GK(1)SYPFR	1.314	1.28933	1.30584	2.93877	0.238517	0.0993524	0.12819
map00350 Tyrosine metabolism	0.317375	1.44	A0A5G2QUP3	168	K	9.843	0.00169033	Up	Amine oxidase OS=Sus scrofa OX=9823 GN=MAOA PE=1 SV=1	MAOA	K00274	1	0.0116435	110.81	2	ICWTK(1)TAK	0.031118	1.43424	1.19829	2.0503		0.168682	0.14849
map00350 Tyrosine metabolism	0.317375	1.44	A0A5G2QUP3	136	K	6.376	0.00644752	Up	Amine oxidase OS=Sus scrofa OX=9823 GN=MAOA PE=1 SV=1	MAOA	K00274	1	0.0255059	85.064	2	TMDDMGK(1)K	-0.89681	1.36682	1.29994	1.85995	0.309233	0.164056
map00350 Tyrosine metabolism	0.317375	1.44	A0A5K1UWY1	191	K	12.638	0.000435349	Up	Maleylacetoacetate isomerase OS=Sus scrofa OX=9823 GN=GSTZ1 PE=1 SV=1	GSTZ1	K01800	1	4.24742e-44	312.42	2	INK(1)SLLALEAFQVSHPSR	-0.41789	1.56057	1.70605	2.29344	0.208517	0.101893	0.129526
map00350 Tyrosine metabolism	0.317375	1.44	A0A5K1UWY1	177	K	23.734	0.000153212	Up	Maleylacetoacetate isomerase OS=Sus scrofa OX=9823 GN=GSTZ1 PE=1 SV=1	GSTZ1	K01800	1	1.43668e-05	187.31	2	YK(1)VDLSPYPTISR	-0.21251	2.14127	1.49688	2.11927	0.106443	0.0818943	0.0542464
map00360 Phenylalanine metabolism	0.378978	1.56	A0A287BPT0	195	K	2.4	0.0233365	Up	Amine oxidase OS=Sus scrofa OX=9823 GN=IL4I1 PE=1 SV=1	IL4I1	K03334	1	1.68098e-05	214.05	2	ALEDLK(1)TLGCR	0.51981	1.20217	1.15474	1.87817	0.831458	0.485994	0.447469
map00360 Phenylalanine metabolism	0.378978	1.56	A0A287BPT0	354	K	10.856	0.00445141	Up	Amine oxidase OS=Sus scrofa OX=9823 GN=IL4I1 PE=1 SV=1	IL4I1	K03334	1	2.01115e-06	149.69	2	ALHYLPATK(1)VFLSFR	0.0098332	1.52372	1.25617	2.71404	0.183979	0.0760498	0.24604
map00360 Phenylalanine metabolism	0.378978	1.56	A0A287BPT0	500	K	5.137	0.0203042	Up	Amine oxidase OS=Sus scrofa OX=9823 GN=IL4I1 PE=1 SV=1	IL4I1	K03334	1	2.50728e-38	263.71	3	IYFAGEHTAFPHGWVETAVK(1)SALR	0.26822	1.1991	1.04709	2.77616	0.513719	0.291314	0.172616
map00360 Phenylalanine metabolism	0.378978	1.56	A0A287BPT0	442	K	6.095	0.00897975	Up	Amine oxidase OS=Sus scrofa OX=9823 GN=IL4I1 PE=1 SV=1	IL4I1	K03334	1	0.000402054	190.51	2	LWDGSGVIK(1)R	-0.021554	1.68127	1.17312	2.29994	0.487875	0.205652	0.152136
map00360 Phenylalanine metabolism	0.378978	1.56	P00506	90	K	27.053	0.000878985	Up	Aspartate aminotransferase, mitochondrial OS=Sus scrofa OX=9823 GN=GOT2 PE=1 SV=2	GOT2	K14455	1	1.28758e-38	315.59	2	K(1)AEAQIAAK(1)NLDK	-0.28283	1.73603	1.80514	2.24496	0.126186	0.0526204	0.0350725
map00360 Phenylalanine metabolism	0.378978	1.56	P00506	122	K	4.877	0.0126835	Up	Aspartate aminotransferase, mitochondrial OS=Sus scrofa OX=9823 GN=GOT2 PE=1 SV=2	GOT2	K14455	1	4.4751e-100	385.31	2	ASAELALGENNEVLK(1)SGR	-0.26663	1.24871	1.6234	2.1069	0.602666	0.178371	0.239957
map00360 Phenylalanine metabolism	0.378978	1.56	P00506	73	K	4.807	0.0021095	Up	Aspartate aminotransferase, mitochondrial OS=Sus scrofa OX=9823 GN=GOT2 PE=1 SV=2	GOT2	K14455	1	0.00311676	112.13	2	DDNGK(1)PYVLPSVR	-0.24733	1.52005	1.67046	1.77625	0.371542	0.21292	0.448776
map00360 Phenylalanine metabolism	0.378978	1.56	P00506	159	K	27.652	0.00017082	Up	Aspartate aminotransferase, mitochondrial OS=Sus scrofa OX=9823 GN=GOT2 PE=1 SV=2	GOT2	K14455	1	2.28188e-25	259.7	2	DVFLPK(1)PSWGNHTPIFR	-0.14649	2.4752	1.57385	1.74154	0.08588	0.0787644	0.0447638
map00360 Phenylalanine metabolism	0.378978	1.56	P00506	404	K	13.671	0.00011086	Up	Aspartate aminotransferase, mitochondrial OS=Sus scrofa OX=9823 GN=GOT2 PE=1 SV=2	GOT2	K14455	1	3.9735e-05	205.09	2	EFSIYMTK(1)DGR	-0.40074	1.99297	1.75064	1.84742	0.185849	0.11365	0.10947
map00360 Phenylalanine metabolism	0.378978	1.56	P00506	234	K	11.05	0.000617036	Up	Aspartate aminotransferase, mitochondrial OS=Sus scrofa OX=9823 GN=GOT2 PE=1 SV=2	GOT2	K14455	1	1.70945e-06	93.437	5	IPAQSVILLHACAHNPTGVDPRPEQWK(1)EMATLVK(1)K	-0.28561	1.64881	2.15028	1.70299	0.247217	0.139063	0.111637
map00360 Phenylalanine metabolism	0.378978	1.56	P00506	279	K	32.497	0.000531278	Up	Aspartate aminotransferase, mitochondrial OS=Sus scrofa OX=9823 GN=GOT2 PE=1 SV=2	GOT2	K14455	1	3.08668e-46	282.05	3	HFIEQGINVCLCQSYAK(1)NMGLYGER	-0.21123	1.75921	1.28562	1.85466		0.0609308	0.0395821
map00360 Phenylalanine metabolism	0.378978	1.56	P00506	345	K	8.513	0.00572542	Up	Aspartate aminotransferase, mitochondrial OS=Sus scrofa OX=9823 GN=GOT2 PE=1 SV=2	GOT2	K14455	1	8.52894e-05	179.19	3	QQWLQEVK(1)GMADR	-0.49791	1.41017	1.98195	1.24477	0.239821		0.123294
map00360 Phenylalanine metabolism	0.378978	1.56	P00506	309	K	10.969	0.000213193	Up	Aspartate aminotransferase, mitochondrial OS=Sus scrofa OX=9823 GN=GOT2 PE=1 SV=2	GOT2	K14455	1	1.53243e-05	207.29	2	VESQLK(1)ILIR	0.4788	1.91308	1.91324	1.67237	0.228165	0.121864	0.151283
map00360 Phenylalanine metabolism	0.378978	1.56	P00506	296	K	13.166	0.000619756	Up	Aspartate aminotransferase, mitochondrial OS=Sus scrofa OX=9823 GN=GOT2 PE=1 SV=2	GOT2	K14455	1	4.3194e-07	196.67	3	VGAFTVVCK(1)DAEEAK(1)R	0.22048	1.47011	1.86087	2.24548	0.212591	0.0968385	0.114108
map00360 Phenylalanine metabolism	0.378978	1.56	P00506	185	K	7.392	0.000898733	Up	Aspartate aminotransferase, mitochondrial OS=Sus scrofa OX=9823 GN=GOT2 PE=1 SV=2	GOT2	K14455	1	1.17093e-17	213.49	2	YYDPK(1)TCGFDFTGALEDISK	1.4659	1.89835	1.72845	1.65824	0.351514	0.164186	0.199257
map00360 Phenylalanine metabolism	0.378978	1.56	A0A5G2QUP3	104	K	11.874	0.00281841	Up	Amine oxidase OS=Sus scrofa OX=9823 GN=MAOA PE=1 SV=1	MAOA	K00274	1	0.0230777	111.28	2	GK(1)SYPFR	1.314	1.28933	1.30584	2.93877	0.238517	0.0993524	0.12819
map00360 Phenylalanine metabolism	0.378978	1.56	A0A5G2QUP3	168	K	9.843	0.00169033	Up	Amine oxidase OS=Sus scrofa OX=9823 GN=MAOA PE=1 SV=1	MAOA	K00274	1	0.0116435	110.81	2	ICWTK(1)TAK	0.031118	1.43424	1.19829	2.0503		0.168682	0.14849
map00360 Phenylalanine metabolism	0.378978	1.56	A0A5G2QUP3	136	K	6.376	0.00644752	Up	Amine oxidase OS=Sus scrofa OX=9823 GN=MAOA PE=1 SV=1	MAOA	K00274	1	0.0255059	85.064	2	TMDDMGK(1)K	-0.89681	1.36682	1.29994	1.85995	0.309233	0.164056
map00380 Tryptophan metabolism	0.000825854	2.2	A0A287ADK3	409	K	17.969	0.0215392	Up	Aldehyde dehydrogenase (NAD(+)) OS=Sus scrofa OX=9823 GN=ALDH7A1 PE=1 SV=1	ALDH7A1	K14085	1	5.53261e-40	301.93	3	FK(1)NEDEVFAWNNEVK	-0.20014	1.56962	0.998956	2.25255	0.152374	0.0264957
map00380 Tryptophan metabolism	0.000825854	2.2	A0A287ADK3	322	K	11.332	0.000279857	Up	Aldehyde dehydrogenase (NAD(+)) OS=Sus scrofa OX=9823 GN=ALDH7A1 PE=1 SV=1	ALDH7A1	K14085	1	0.00984518	102.95	2	LTK(1)AYAQIR	-0.33877	1.5294	2.12202	1.86203	0.224637	0.125655	0.136265
map00380 Tryptophan metabolism	0.000825854	2.2	A0A287AA21	139	K	20.278	0.000317685	Up	Enoyl-CoA hydratase, mitochondrial OS=Sus scrofa OX=9823 GN=ECHS1 PE=1 SV=2	ECHS1	K07511	1	2.67594e-146	404.47	4	AFAAGADIK(1)EMQNQTFQDCYSGGFLSHWDHLSR	0.4262	2.63466		2.02096	0.096066	0.133847	0.11447
map00380 Tryptophan metabolism	0.000825854	2.2	A0A287AA21	320	K	6.846	0.0125963	Up	Enoyl-CoA hydratase, mitochondrial OS=Sus scrofa OX=9823 GN=ECHS1 PE=1 SV=2	ECHS1	K07511	1	0.00959304	88.364	2	EGMTAFVEK(1)R	0.70354	1.44063	1.29248	1.82318	0.319528	0.124176
map00380 Tryptophan metabolism	0.000825854	2.2	A0A287AA21	81	K	34.123	0.00143034	Up	Enoyl-CoA hydratase, mitochondrial OS=Sus scrofa OX=9823 GN=ECHS1 PE=1 SV=2	ECHS1	K07511	1	5.79872e-96	376.25	2	GK(1)SSNVGLIQLNRPK	0.042881	1.85701	1.5273	2.44486	0.109275	0.0233578	0.0381957
map00380 Tryptophan metabolism	0.000825854	2.2	A0A287AA21	94	K	3.783	0.0112545	Up	Enoyl-CoA hydratase, mitochondrial OS=Sus scrofa OX=9823 GN=ECHS1 PE=1 SV=2	ECHS1	K07511	1	0.000289903	179.21	2	PK(1)ALNALCK	-1.0226	1.47849	1.44979	1.81725	0.702539	0.28967	0.262259
map00380 Tryptophan metabolism	0.000825854	2.2	A0A287ALM2	748	K	21.105	0.0174541	Up	Oxoglutarate dehydrogenase (succinyl-transferring) OS=Sus scrofa OX=9823 GN=DHTKD1 PE=1 SV=1	DHTKD1	K15791	1	0.0111592	91.636	2	VK(1)SLVFCSGK	0.18182		1.54857	2.27047	0.12234		0.0586163
map00380 Tryptophan metabolism	0.000825854	2.2	A0A287BPT0	195	K	2.4	0.0233365	Up	Amine oxidase OS=Sus scrofa OX=9823 GN=IL4I1 PE=1 SV=1	IL4I1	K03334	1	1.68098e-05	214.05	2	ALEDLK(1)TLGCR	0.51981	1.20217	1.15474	1.87817	0.831458	0.485994	0.447469
map00380 Tryptophan metabolism	0.000825854	2.2	A0A287BPT0	354	K	10.856	0.00445141	Up	Amine oxidase OS=Sus scrofa OX=9823 GN=IL4I1 PE=1 SV=1	IL4I1	K03334	1	2.01115e-06	149.69	2	ALHYLPATK(1)VFLSFR	0.0098332	1.52372	1.25617	2.71404	0.183979	0.0760498	0.24604
map00380 Tryptophan metabolism	0.000825854	2.2	A0A287BPT0	500	K	5.137	0.0203042	Up	Amine oxidase OS=Sus scrofa OX=9823 GN=IL4I1 PE=1 SV=1	IL4I1	K03334	1	2.50728e-38	263.71	3	IYFAGEHTAFPHGWVETAVK(1)SALR	0.26822	1.1991	1.04709	2.77616	0.513719	0.291314	0.172616
map00380 Tryptophan metabolism	0.000825854	2.2	A0A287BPT0	442	K	6.095	0.00897975	Up	Amine oxidase OS=Sus scrofa OX=9823 GN=IL4I1 PE=1 SV=1	IL4I1	K03334	1	0.000402054	190.51	2	LWDGSGVIK(1)R	-0.021554	1.68127	1.17312	2.29994	0.487875	0.205652	0.152136
map00380 Tryptophan metabolism	0.000825854	2.2	Q2XQV4	432	K	9.995	0.00100617	Up	Aldehyde dehydrogenase, mitochondrial OS=Sus scrofa OX=9823 GN=ALDH2 PE=2 SV=1	ALDH2	K00128	1	0.000171453	152.34	2	FK(1)TIEEVIGR	0.50264	1.99671	2.16627	1.29131	0.17112	0.119906	0.254688
map00380 Tryptophan metabolism	0.000825854	2.2	Q2XQV4	379	K	12.974	0.00838091	Up	Aldehyde dehydrogenase, mitochondrial OS=Sus scrofa OX=9823 GN=ALDH2 PE=2 SV=1	ALDH2	K00128	1	0.0325645	76.827	2	ILGYIK(1)SGK	-0.12652	1.15901	1.47018	2.12645	0.176825		0.0675384
map00380 Tryptophan metabolism	0.000825854	2.2	Q2XQV4	372	K	9.488	0.00431005	Up	Aldehyde dehydrogenase, mitochondrial OS=Sus scrofa OX=9823 GN=ALDH2 PE=2 SV=1	ALDH2	K00128	1	2.41837e-50	323.66	3	TEQGPQIDETQFK(1)K	-0.047026	1.28049	2.31628	1.83114	0.340705	0.103428	0.127952
map00380 Tryptophan metabolism	0.000825854	2.2	Q2XQV4	280	K	23.305	0.000824426	Up	Aldehyde dehydrogenase, mitochondrial OS=Sus scrofa OX=9823 GN=ALDH2 PE=2 SV=1	ALDH2	K00128	1	7.71847e-125	406.71	2	VAFTGSTEVGHLIQVAAGK(1)SNLK	-0.42648	1.48516	2.13671	1.23907	0.078186	0.0608686
map00380 Tryptophan metabolism	0.000825854	2.2	Q2XQV4	159	K	13.142	0.0225955	Up	Aldehyde dehydrogenase, mitochondrial OS=Sus scrofa OX=9823 GN=ALDH2 PE=2 SV=1	ALDH2	K00128	1	0.000621756	134.59	2	YYAGWADK(1)YHGK	-1.8788	0.940432	0.941935	2.87624	0.170285	0.0711114
map00380 Tryptophan metabolism	0.000825854	2.2	A0A5G2QUP3	104	K	11.874	0.00281841	Up	Amine oxidase OS=Sus scrofa OX=9823 GN=MAOA PE=1 SV=1	MAOA	K00274	1	0.0230777	111.28	2	GK(1)SYPFR	1.314	1.28933	1.30584	2.93877	0.238517	0.0993524	0.12819
map00380 Tryptophan metabolism	0.000825854	2.2	A0A5G2QUP3	168	K	9.843	0.00169033	Up	Amine oxidase OS=Sus scrofa OX=9823 GN=MAOA PE=1 SV=1	MAOA	K00274	1	0.0116435	110.81	2	ICWTK(1)TAK	0.031118	1.43424	1.19829	2.0503		0.168682	0.14849
map00380 Tryptophan metabolism	0.000825854	2.2	A0A5G2QUP3	136	K	6.376	0.00644752	Up	Amine oxidase OS=Sus scrofa OX=9823 GN=MAOA PE=1 SV=1	MAOA	K00274	1	0.0255059	85.064	2	TMDDMGK(1)K	-0.89681	1.36682	1.29994	1.85995	0.309233	0.164056
map00380 Tryptophan metabolism	0.000825854	2.2	A0A5G2QGS5	189	K	7.57	0.00461557	Up	Acetyl-CoA acetyltransferase 1 OS=Sus scrofa OX=9823 GN=ACAT1 PE=1 SV=1	ACAT1	K00626	1	1.45144e-17	199.61	3	DGLTDVYNK(1)IHMGNCAENTAK	-0.045735	2.1555	2.01764		0.377836	0.183822	0.265202
map00380 Tryptophan metabolism	0.000825854	2.2	A0A5G2QGS5	244	K	12.716	0.000615442	Up	Acetyl-CoA acetyltransferase 1 OS=Sus scrofa OX=9823 GN=ACAT1 PE=1 SV=1	ACAT1	K00626	1	9.35826e-08	212.59	2	GK(1)PDTVVKEDEEYKR	-0.14921	1.5701	1.94238	2.05008	0.221611	0.121732	0.0940989
map00380 Tryptophan metabolism	0.000825854	2.2	A0A5G2QGS5	250	K	11.974	0.0032655	Up	Acetyl-CoA acetyltransferase 1 OS=Sus scrofa OX=9823 GN=ACAT1 PE=1 SV=1	ACAT1	K00626	1	8.23212e-40	308.74	2	GKPDTVVK(1)EDEEYKR	0.19203	1.50355	1.55256	1.68019	0.181169		0.0825359
map00380 Tryptophan metabolism	0.000825854	2.2	A0A5G2QGS5	267	K	12.183	0.0100254	Up	Acetyl-CoA acetyltransferase 1 OS=Sus scrofa OX=9823 GN=ACAT1 PE=1 SV=1	ACAT1	K00626	1	0.00533267	173.11	2	LK(1)TVFQK	0.48107	1.52684	1.38348	1.83026	0.198907		0.0605114
map00380 Tryptophan metabolism	0.000825854	2.2	A0A5G2QGS5	123	K	2.893	0.00648098	Up	Acetyl-CoA acetyltransferase 1 OS=Sus scrofa OX=9823 GN=ACAT1 PE=1 SV=1	ACAT1	K00626	1	4.41462e-10	151.42	3	QAVLGAGLPISTPCTTINK(1)VCASGMK	1.4209	1.05519	1.54805	1.46041	0.464522		0.471823
map00380 Tryptophan metabolism	0.000825854	2.2	A0A5G2QGS5	222	K	11.922	0.00257753	Up	Acetyl-CoA acetyltransferase 1 OS=Sus scrofa OX=9823 GN=ACAT1 PE=1 SV=1	ACAT1	K00626	1	0.0158276	91.085	2	SK(1)AAWEAGK	-0.74953	2.24838	2.19285		0.26981	0.14756	0.141401
map00380 Tryptophan metabolism	0.000825854	2.2	A0A5G2QGS5	262	K	25.223	0.000792457	Up	Acetyl-CoA acetyltransferase 1 OS=Sus scrofa OX=9823 GN=ACAT1 PE=1 SV=1	ACAT1	K00626	1	0.00402759	132.57	2	VDFNK(1)VPK	0.10583	1.23796	1.78037	1.85292		0.0781217	0.050632
map00380 Tryptophan metabolism	0.000825854	2.2	A0A5S6FV10	132	K	5.587	4.02744e-06	Up	Dihydrolipoyllysine-residue succinyltransferase component of 2-oxoglutarate dehydrogenase complex, mitochondrial OS=Sus scrofa OX=9823 GN=DLST PE=3 SV=1	DLST	K00658	1	0.0311311	72.434	2	AK(1)PAEAPAAAAPK	-1.0013	1.58949	1.85452	1.64508	0.311255	0.295046	0.304612
map00380 Tryptophan metabolism	0.000825854	2.2	A0A5G2QPK6	58	K	14.471	0.00105459	Up	Dihydrolipoyl dehydrogenase OS=Sus scrofa OX=9823 GN=DLD PE=1 SV=1	DLD	K00382	1	6.98919e-05	196.48	2	AAQLGFK(1)TVCIEK	0.0011054	1.63951	1.56697	2.40569	0.205739	0.0759641	0.106127
map00380 Tryptophan metabolism	0.000825854	2.2	A0A5G2QPK6	96	K	7.669	0.00101237	Up	Dihydrolipoyl dehydrogenase OS=Sus scrofa OX=9823 GN=DLD PE=1 SV=1	DLD	K00382	1	6.69026e-49	313.04	4	ALLNNSHYYHMAHGK(1)DFASR	0.81498	1.90275	1.34769	2.05746	0.18081	0.180116	0.331169
map00380 Tryptophan metabolism	0.000825854	2.2	A0A5G2QPK6	135	K	2.712	0.0179189	Up	Dihydrolipoyl dehydrogenase OS=Sus scrofa OX=9823 GN=DLD PE=1 SV=1	DLD	K00382	1	2.83008e-140	407.16	3	SNAVK(1)ALTGGIAHLFK(1)QNK	-0.511	1.39969	1.94509	1.03871	0.37931	0.71524	0.52196
map00380 Tryptophan metabolism	0.000825854	2.2	A0A5G2QPK6	409	K	4.416	0.00806848	Up	Dihydrolipoyl dehydrogenase OS=Sus scrofa OX=9823 GN=DLD PE=1 SV=1	DLD	K00382	1	9.81057e-41	315.21	2	EEGIEYK(1)VGK	0.0090722	1.65767	1.73328	1.50127	0.597975	0.312334	0.197473
map00380 Tryptophan metabolism	0.000825854	2.2	A0A5G2QPK6	269	K	10.152	0.000750656	Up	Dihydrolipoyl dehydrogenase OS=Sus scrofa OX=9823 GN=DLD PE=1 SV=1	DLD	K00382	1	0.00021351	178.55	2	LNTK(1)VIGATK	-0.50256	1.41263	1.84138	2.20799	0.246217	0.175624	0.11616
map00380 Tryptophan metabolism	0.000825854	2.2	A0A5G2QPK6	338	K	5.662	0.00569049	Up	Dihydrolipoyl dehydrogenase OS=Sus scrofa OX=9823 GN=DLD PE=1 SV=1	DLD	K00382	1	2.12613e-09	154.65	3	FQTK(1)IPNIYAIGDVVAGPMLAHK	-0.4543	1.04519	1.32725	2.7269	0.242605	0.311758	0.346298
map00380 Tryptophan metabolism	0.000825854	2.2	A0A5G2QPK6	259	K	4.306	0.00171738	Up	Dihydrolipoyl dehydrogenase OS=Sus scrofa OX=9823 GN=DLD PE=1 SV=1	DLD	K00382	1	0.000942284	135.83	2	ILQK(1)QGFK(1)FK	-0.29711	1.38859	1.8666	1.61407	0.515362	0.282005	0.333363
map00380 Tryptophan metabolism	0.000825854	2.2	A0A5G2QPK6	151	K	12.703	0.000528701	Up	Dihydrolipoyl dehydrogenase OS=Sus scrofa OX=9823 GN=DLD PE=1 SV=1	DLD	K00382	1	5.05413e-10	201.61	3	ITGK(1)NQVTATK(1)ADGSTEVINTK	0.16389	1.75435	1.80692	2.00089	0.222108	0.0946223	0.121115
map00380 Tryptophan metabolism	0.000825854	2.2	A0A5G2QPK6	158	K	21.78	0.00019812	Up	Dihydrolipoyl dehydrogenase OS=Sus scrofa OX=9823 GN=DLD PE=1 SV=1	DLD	K00382	1	9.13913e-100	377.19	2	NQVTATK(1)ADGSTEVINTK	-0.156	1.61789	2.19801	1.92072	0.121481	0.0855181	0.0563852
map00380 Tryptophan metabolism	0.000825854	2.2	A0A5G2QPK6	119	K	12.123	0.00472041	Up	Dihydrolipoyl dehydrogenase OS=Sus scrofa OX=9823 GN=DLD PE=1 SV=1	DLD	K00382	1	9.06167e-05	179.1	2	MMEQK(1)SNAVK	-0.32445	1.39617	0.839096	3.30751	0.181401	0.130613	0.145213
map00380 Tryptophan metabolism	0.000825854	2.2	A0A5G2QPK6	124	K	11.949	0.0040856	Up	Dihydrolipoyl dehydrogenase OS=Sus scrofa OX=9823 GN=DLD PE=1 SV=1	DLD	K00382	1	1.49524e-09	167.14	3	SNAVK(1)ALTGGIAHLFK(1)QNK	-0.511	2.07125	0.955968	1.70857	0.123067	0.141145
map00380 Tryptophan metabolism	0.000825854	2.2	A0A5G2QPK6	402	K	2.117	0.0256796	Up	Dihydrolipoyl dehydrogenase OS=Sus scrofa OX=9823 GN=DLD PE=1 SV=1	DLD	K00382	1	6.03025e-06	209.19	2	SEEQLK(1)EEGIEYK	0.28517	1.32037	1.83202	0.922558	0.625911	0.712405	0.586733
map00380 Tryptophan metabolism	0.000825854	2.2	A0A5S6HDE4	231	K	2.576	0.00250875	Up	Hydroxyacyl-coenzyme A dehydrogenase, mitochondrial OS=Sus scrofa OX=9823 GN=HADH PE=1 SV=1	HADH	K00022	1	6.94408e-05	150.09	2	GDASK(1)EDIDTAMK	0.26145	1.5284	1.65931	1.1345	0.633765	0.559479	0.484542
map00380 Tryptophan metabolism	0.000825854	2.2	A0A5S6HDE4	202	K	18.551	0.000642125	Up	Hydroxyacyl-coenzyme A dehydrogenase, mitochondrial OS=Sus scrofa OX=9823 GN=HADH PE=1 SV=1	HADH	K00022	1	2.6101e-135	417.7	3	HPVSCK(1)DTPGFIVNR	0.22751	2.15088	1.56223	1.97999	0.167468	0.0746803	0.0647446
map00380 Tryptophan metabolism	0.000825854	2.2	A0A5S6HDE4	68	K	2.566	0.0197806	Up	Hydroxyacyl-coenzyme A dehydrogenase, mitochondrial OS=Sus scrofa OX=9823 GN=HADH PE=1 SV=1	HADH	K00022	1	0.00335906	129.56	2	K(1)GIEESLR	-0.2846	1.35863	1.55845	1.05167		0.614864	0.41638
map00380 Tryptophan metabolism	0.000825854	2.2	A0A5S6HDE4	192	K	6.499	0.000761788	Up	Hydroxyacyl-coenzyme A dehydrogenase, mitochondrial OS=Sus scrofa OX=9823 GN=HADH PE=1 SV=1	HADH	K00022	1	3.51536e-06	201.6	2	TLESLVDFSK(1)TLGK	-0.3572	1.72206	1.91896	1.55885	0.375695	0.194467	0.229971
map00380 Tryptophan metabolism	0.000825854	2.2	Q29554	262	K	7.157	0.000148423	Up	Trifunctional enzyme subunit alpha, mitochondrial OS=Sus scrofa OX=9823 GN=HADHA PE=2 SV=1	HADHA	K07515	1	0.0230026	111.39	2	DK(1)GLVEK	1.9227	1.50796	2.12247	1.63404	0.279951	0.203239	0.252339
map00380 Tryptophan metabolism	0.000825854	2.2	Q29554	337	K	5.135	0.00990179	Up	Trifunctional enzyme subunit alpha, mitochondrial OS=Sus scrofa OX=9823 GN=HADHA PE=2 SV=1	HADHA	K07515	1	0.000273283	140.14	2	ESK(1)ALMGLYR	0.70982	1.50834	1.78929	1.72442	0.593777	0.169854	0.214311
map00380 Tryptophan metabolism	0.000825854	2.2	Q29554	362	K	12.399	0.00224888	Up	Trifunctional enzyme subunit alpha, mitochondrial OS=Sus scrofa OX=9823 GN=HADHA PE=2 SV=1	HADHA	K07515	1	9.1233e-14	179.64	3	EVK(1)HLAILGAGLMGAGIAQVSVDK	-0.67277	1.6314	1.74674	2.17407	0.222383	0.160488	0.064918
map00380 Tryptophan metabolism	0.000825854	2.2	Q29554	383	K	19.394	9.94043e-06	Up	Trifunctional enzyme subunit alpha, mitochondrial OS=Sus scrofa OX=9823 GN=HADHA PE=2 SV=1	HADHA	K07515	1	3.28254e-38	274.47	4	HLAILGAGLMGAGIAQVSVDK(1)HLK	-0.1212	2.12967	1.89821	1.67791	0.090733	0.114597	0.0888792
map00380 Tryptophan metabolism	0.000825854	2.2	Q29554	644	K	15.327	0.0011441	Up	Trifunctional enzyme subunit alpha, mitochondrial OS=Sus scrofa OX=9823 GN=HADHA PE=2 SV=1	HADHA	K07515	1	8.86086e-20	266.58	2	GFYVYQEGVK(1)NR	0.60213	1.48671	2.30343	1.84236	0.198756	0.100973	0.067768
map00380 Tryptophan metabolism	0.000825854	2.2	Q29554	411	K	11.934	0.000413425	Up	Trifunctional enzyme subunit alpha, mitochondrial OS=Sus scrofa OX=9823 GN=HADHA PE=2 SV=1	HADHA	K07515	1	1.50313e-28	286.45	3	GQQQVFK(1)GLNDK(1)VR	1.615	1.57651	2.0978	1.86178	0.219664	0.140402	0.103844
map00380 Tryptophan metabolism	0.000825854	2.2	Q29554	309	K	9.663	0.00122596	Up	Trifunctional enzyme subunit alpha, mitochondrial OS=Sus scrofa OX=9823 GN=HADHA PE=2 SV=1	HADHA	K07515	1	5.4447e-28	256.9	3	IIDVVK(1)TGIEQGSDAGYLSESQK	-0.48788	1.59465	1.25306	2.5896	0.237413	0.19424	0.131039
map00380 Tryptophan metabolism	0.000825854	2.2	Q29554	406	K	5.333	0.000909967	Up	Trifunctional enzyme subunit alpha, mitochondrial OS=Sus scrofa OX=9823 GN=HADHA PE=2 SV=1	HADHA	K07515	1	1.50313e-28	286.45	3	GQQQVFK(1)GLNDK(1)VR	1.615	1.48731	1.95748	1.60773	0.404543	0.222485	0.320456
map00380 Tryptophan metabolism	0.000825854	2.2	Q29554	350	K	14.935	0.00147652	Up	Trifunctional enzyme subunit alpha, mitochondrial OS=Sus scrofa OX=9823 GN=HADHA PE=2 SV=1	HADHA	K07515	1	0.00182356	143.91	2	GQTLCK(1)K(1)NK	-0.2853	1.30268	1.99373	2.32706	0.21086	0.0863472	0.0793269
map00380 Tryptophan metabolism	0.000825854	2.2	Q29554	351	K	14.935	0.00147652	Up	Trifunctional enzyme subunit alpha, mitochondrial OS=Sus scrofa OX=9823 GN=HADHA PE=2 SV=1	HADHA	K07515	1	0.00182356	143.91	2	GQTLCK(1)K(1)NK	-0.2853	1.30268	1.99373	2.32706	0.21086	0.0863472	0.0793269
map00380 Tryptophan metabolism	0.000825854	2.2	Q29554	386	K	12.376	0.0015873	Up	Trifunctional enzyme subunit alpha, mitochondrial OS=Sus scrofa OX=9823 GN=HADHA PE=2 SV=1	HADHA	K07515	1	0.0143054	129.47	2	HLK(1)TILK	-0.23222	1.92691	1.70284	1.92167	0.239517	0.0732694	0.135795
map00380 Tryptophan metabolism	0.000825854	2.2	Q29554	569	K	6.484	0.000221604	Up	Trifunctional enzyme subunit alpha, mitochondrial OS=Sus scrofa OX=9823 GN=HADHA PE=2 SV=1	HADHA	K07515	1	6.69682e-05	145.17	2	ILQEGVGPK(1)K	-0.45387	1.48643	2.22279	1.4891	0.264961	0.295403	0.241316
map00380 Tryptophan metabolism	0.000825854	2.2	Q29554	415	K	5.846	0.000430241	Up	Trifunctional enzyme subunit alpha, mitochondrial OS=Sus scrofa OX=9823 GN=HADHA PE=2 SV=1	HADHA	K07515	1	0.0156839	109.71	2	K(1)K(1)ALTSFER	0.00556	1.54473	1.83478	1.74407	0.387967	0.259421	0.22904
map00380 Tryptophan metabolism	0.000825854	2.2	Q29554	414	K	6.775	0.000281527	Up	Trifunctional enzyme subunit alpha, mitochondrial OS=Sus scrofa OX=9823 GN=HADHA PE=2 SV=1	HADHA	K07515	1	0.0196487	109.71	2	K(1)K(1)ALTSFER	0.00556	1.58979	1.87795	1.76058	0.3357	0.237865	0.198115
map00380 Tryptophan metabolism	0.000825854	2.2	Q29554	597	K	49.862	0.000225682	Up	Trifunctional enzyme subunit alpha, mitochondrial OS=Sus scrofa OX=9823 GN=HADHA PE=2 SV=1	HADHA	K07515	1	1.99798e-98	345.79	4	LDSLTTSFGFPVGAATLMDEVGMDVAK(1)HVAENLGK	0.19193	1.33536	2.20761	2.33906	0.0270586	0.0610966	0.0298099
map00380 Tryptophan metabolism	0.000825854	2.2	Q29554	214	K	8.368	0.0165153	Up	Trifunctional enzyme subunit alpha, mitochondrial OS=Sus scrofa OX=9823 GN=HADHA PE=2 SV=1	HADHA	K07515	1	0.000150662	100.08	3	K(1)MGLVDQLVEPLGPGLKPPEER	-0.76534	1.29578	2.1035	1.23176		0.275297	0.0936636
map00380 Tryptophan metabolism	0.000825854	2.2	Q29554	292	K	7.381	9.84506e-05	Up	Trifunctional enzyme subunit alpha, mitochondrial OS=Sus scrofa OX=9823 GN=HADHA PE=2 SV=1	HADHA	K07515	1	1.84032e-12	234.92	2	K(1)QTK(1)GLYPAPLK	-0.034596	1.4069	1.90507	1.97215	0.272319	0.225776	0.217793
map00380 Tryptophan metabolism	0.000825854	2.2	Q29554	295	K	7.591	0.00013527	Up	Trifunctional enzyme subunit alpha, mitochondrial OS=Sus scrofa OX=9823 GN=HADHA PE=2 SV=1	HADHA	K07515	1	1.84032e-12	234.92	2	QTK(1)GLYPAPLK(1)IIDVVK	0.38096	1.32944	2.05122	1.92096	0.245202	0.217096	0.236093
map00380 Tryptophan metabolism	0.000825854	2.2	Q29554	634	K	6.425	0.011437	Up	Trifunctional enzyme subunit alpha, mitochondrial OS=Sus scrofa OX=9823 GN=HADHA PE=2 SV=1	HADHA	K07515	1	5.26918e-05	156.01	2	SGK(1)GFYVYQEGVK	0.6105	1.04396	1.88455	2.26345	0.490762	0.16206	0.155214
map00380 Tryptophan metabolism	0.000825854	2.2	Q29554	285	K	23.805	0.00153919	Up	Trifunctional enzyme subunit alpha, mitochondrial OS=Sus scrofa OX=9823 GN=HADHA PE=2 SV=1	HADHA	K07515	1	0.00173611	188.81	2	K(1)VEEK(1)VR	-1.2912	1.59953	1.42516	1.83909	0.0920056	0.044207
map00380 Tryptophan metabolism	0.000825854	2.2	Q29554	289	K	23.805	0.00153919	Up	Trifunctional enzyme subunit alpha, mitochondrial OS=Sus scrofa OX=9823 GN=HADHA PE=2 SV=1	HADHA	K07515	1	0.00173611	188.81	2	K(1)VEEK(1)VR	-1.2912	1.59953	1.42516	1.83909	0.0920056	0.044207
map00380 Tryptophan metabolism	0.000825854	2.2	Q29554	735	K	3.491	0.0118892	Up	Trifunctional enzyme subunit alpha, mitochondrial OS=Sus scrofa OX=9823 GN=HADHA PE=2 SV=1	HADHA	K07515	1	0.0119138	104.06	2	K(1)YEAIYGK	0.26186	1.23405	2.03733	1.39269	0.638898	0.430363	0.266668
map00380 Tryptophan metabolism	0.000825854	2.2	Q29554	742	K	7.604	0.0174953	Up	Trifunctional enzyme subunit alpha, mitochondrial OS=Sus scrofa OX=9823 GN=HADHA PE=2 SV=1	HADHA	K07515	1	3.33074e-56	310.9	3	YEAIYGK(1)QFTPCQLLIDHASSPNK	-0.40933	2.1914	0.973562	2.13768	0.472701	0.137778	0.0868798
map00380 Tryptophan metabolism	0.000825854	2.2	Q29554	534	K	4.968	0.000506262	Up	Trifunctional enzyme subunit alpha, mitochondrial OS=Sus scrofa OX=9823 GN=HADHA PE=2 SV=1	HADHA	K07515	1	0.00874134	105.14	2	QGK(1)VIIVVK	0.043046	1.36823	1.52781	2.09859	0.391651	0.323143	0.290575
map00380 Tryptophan metabolism	0.000825854	2.2	Q29554	540	K	14.449	0.000158613	Up	Trifunctional enzyme subunit alpha, mitochondrial OS=Sus scrofa OX=9823 GN=HADHA PE=2 SV=1	HADHA	K07515	1	7.99001e-16	250.94	2	VIIVVK(1)DGPGFYTTR	-0.12074	1.60044	2.05039	1.96079	0.178844	0.100987	0.108549
map00380 Tryptophan metabolism	0.000825854	2.2	Q29554	625	K	7.608	0.00111284	Up	Trifunctional enzyme subunit alpha, mitochondrial OS=Sus scrofa OX=9823 GN=HADHA PE=2 SV=1	HADHA	K07515	1	0.0025854	118.5	2	QMISK(1)GFLGR	-0.27704	1.1603	1.70591	2.43674	0.275322	0.229837	0.191894
map00380 Tryptophan metabolism	0.000825854	2.2	Q29554	505	K	6.295	0.000205172	Up	Trifunctional enzyme subunit alpha, mitochondrial OS=Sus scrofa OX=9823 GN=HADHA PE=2 SV=1	HADHA	K07515	1	1.51822e-08	153.88	3	VIGMHYFSPVDK(1)MQLLEIITTEK(1)TSK	-0.39814	1.33542	1.74453	2.09761	0.265787	0.302348	0.254302
map00380 Tryptophan metabolism	0.000825854	2.2	Q29554	46	K	8.052	0.000393129	Up	Trifunctional enzyme subunit alpha, mitochondrial OS=Sus scrofa OX=9823 GN=HADHA PE=2 SV=1	HADHA	K07515	1	3.54276e-40	307.15	3	THINYGVK(1)GDVAVIR	-0.22291	1.61211	1.97531	1.74975	0.298486	0.205942	0.158402
map00380 Tryptophan metabolism	0.000825854	2.2	Q29554	249	K	26.732	0.000913743	Up	Trifunctional enzyme subunit alpha, mitochondrial OS=Sus scrofa OX=9823 GN=HADHA PE=2 SV=1	HADHA	K07515	1	1.15063e-11	195.1	2	TIEYLEEVAVTFAK(1)GLADK	0.45096	1.91777	1.70262	1.25795	0.0458436		0.0758183
map00410 beta-Alanine metabolism	0.0164588	2.08	A0A287ADK3	409	K	17.969	0.0215392	Up	Aldehyde dehydrogenase (NAD(+)) OS=Sus scrofa OX=9823 GN=ALDH7A1 PE=1 SV=1	ALDH7A1	K14085	1	5.53261e-40	301.93	3	FK(1)NEDEVFAWNNEVK	-0.20014	1.56962	0.998956	2.25255	0.152374	0.0264957
map00410 beta-Alanine metabolism	0.0164588	2.08	A0A287ADK3	322	K	11.332	0.000279857	Up	Aldehyde dehydrogenase (NAD(+)) OS=Sus scrofa OX=9823 GN=ALDH7A1 PE=1 SV=1	ALDH7A1	K14085	1	0.00984518	102.95	2	LTK(1)AYAQIR	-0.33877	1.5294	2.12202	1.86203	0.224637	0.125655	0.136265
map00410 beta-Alanine metabolism	0.0164588	2.08	A0A287BG49	306	K	4.488	0.000917961	Up	Short-chain-specific acyl-CoA dehydrogenase, mitochondrial OS=Sus scrofa OX=9823 GN=ACADS PE=1 SV=1	ACADS	K00248	1	1.05069e-06	184.9	2	AFGVPLTK(1)LQGIQFK	0.43514	1.23489	1.93169	1.74005	0.440723	0.314058	0.338591
map00410 beta-Alanine metabolism	0.0164588	2.08	A0A287BG49	262	K	4.285	0.00455088	Up	Short-chain-specific acyl-CoA dehydrogenase, mitochondrial OS=Sus scrofa OX=9823 GN=ACADS PE=1 SV=1	ACADS	K00248	1	3.87505e-06	127.05	3	ENLLGEPGMGFK(1)IAMQTLDMGR	-0.66191	1.29993	1.86584	1.161		0.325755	0.34748
map00410 beta-Alanine metabolism	0.0164588	2.08	A0A287BG49	389	K	21.088	0.000102548	Up	Short-chain-specific acyl-CoA dehydrogenase, mitochondrial OS=Sus scrofa OX=9823 GN=ACADS PE=1 SV=1	ACADS	K00248	1	2.78967e-06	218.47	3	LVIAGHLLK(1)SYRS	-0.41221	2.50745	1.61607	1.60484	0.0999544	0.0686739	0.103011
map00410 beta-Alanine metabolism	0.0164588	2.08	A0A287BG49	208	K	3.749	0.0205058	Up	Short-chain-specific acyl-CoA dehydrogenase, mitochondrial OS=Sus scrofa OX=9823 GN=ACADS PE=1 SV=1	ACADS	K00248	1	3.98706e-07	125.04	3	SLQNK(1)GISAFLVPMPTPGLTLGK	-0.1081	1.34448	1.75932	1.14127	0.501996	0.252937
map00410 beta-Alanine metabolism	0.0164588	2.08	A0A287AA21	139	K	20.278	0.000317685	Up	Enoyl-CoA hydratase, mitochondrial OS=Sus scrofa OX=9823 GN=ECHS1 PE=1 SV=2	ECHS1	K07511	1	2.67594e-146	404.47	4	AFAAGADIK(1)EMQNQTFQDCYSGGFLSHWDHLSR	0.4262	2.63466		2.02096	0.096066	0.133847	0.11447
map00410 beta-Alanine metabolism	0.0164588	2.08	A0A287AA21	320	K	6.846	0.0125963	Up	Enoyl-CoA hydratase, mitochondrial OS=Sus scrofa OX=9823 GN=ECHS1 PE=1 SV=2	ECHS1	K07511	1	0.00959304	88.364	2	EGMTAFVEK(1)R	0.70354	1.44063	1.29248	1.82318	0.319528	0.124176
map00410 beta-Alanine metabolism	0.0164588	2.08	A0A287AA21	81	K	34.123	0.00143034	Up	Enoyl-CoA hydratase, mitochondrial OS=Sus scrofa OX=9823 GN=ECHS1 PE=1 SV=2	ECHS1	K07511	1	5.79872e-96	376.25	2	GK(1)SSNVGLIQLNRPK	0.042881	1.85701	1.5273	2.44486	0.109275	0.0233578	0.0381957
map00410 beta-Alanine metabolism	0.0164588	2.08	A0A287AA21	94	K	3.783	0.0112545	Up	Enoyl-CoA hydratase, mitochondrial OS=Sus scrofa OX=9823 GN=ECHS1 PE=1 SV=2	ECHS1	K07511	1	0.000289903	179.21	2	PK(1)ALNALCK	-1.0226	1.47849	1.44979	1.81725	0.702539	0.28967	0.262259
map00410 beta-Alanine metabolism	0.0164588	2.08	A0A287B9G2	328	K	12.504	0.00205742	Up	3-hydroxyisobutyryl-CoA hydrolase, mitochondrial OS=Sus scrofa OX=9823 GN=HIBCH PE=1 SV=2	HIBCH	K05605	1	0.00375626	107.57	2	AVLIDK(1)DQNPK	-0.47927	1.47583	2.13269	1.1384		0.139291	0.113795
map00410 beta-Alanine metabolism	0.0164588	2.08	Q2XQV4	432	K	9.995	0.00100617	Up	Aldehyde dehydrogenase, mitochondrial OS=Sus scrofa OX=9823 GN=ALDH2 PE=2 SV=1	ALDH2	K00128	1	0.000171453	152.34	2	FK(1)TIEEVIGR	0.50264	1.99671	2.16627	1.29131	0.17112	0.119906	0.254688
map00410 beta-Alanine metabolism	0.0164588	2.08	Q2XQV4	379	K	12.974	0.00838091	Up	Aldehyde dehydrogenase, mitochondrial OS=Sus scrofa OX=9823 GN=ALDH2 PE=2 SV=1	ALDH2	K00128	1	0.0325645	76.827	2	ILGYIK(1)SGK	-0.12652	1.15901	1.47018	2.12645	0.176825		0.0675384
map00410 beta-Alanine metabolism	0.0164588	2.08	Q2XQV4	372	K	9.488	0.00431005	Up	Aldehyde dehydrogenase, mitochondrial OS=Sus scrofa OX=9823 GN=ALDH2 PE=2 SV=1	ALDH2	K00128	1	2.41837e-50	323.66	3	TEQGPQIDETQFK(1)K	-0.047026	1.28049	2.31628	1.83114	0.340705	0.103428	0.127952
map00410 beta-Alanine metabolism	0.0164588	2.08	Q2XQV4	280	K	23.305	0.000824426	Up	Aldehyde dehydrogenase, mitochondrial OS=Sus scrofa OX=9823 GN=ALDH2 PE=2 SV=1	ALDH2	K00128	1	7.71847e-125	406.71	2	VAFTGSTEVGHLIQVAAGK(1)SNLK	-0.42648	1.48516	2.13671	1.23907	0.078186	0.0608686
map00410 beta-Alanine metabolism	0.0164588	2.08	Q2XQV4	159	K	13.142	0.0225955	Up	Aldehyde dehydrogenase, mitochondrial OS=Sus scrofa OX=9823 GN=ALDH2 PE=2 SV=1	ALDH2	K00128	1	0.000621756	134.59	2	YYAGWADK(1)YHGK	-1.8788	0.940432	0.941935	2.87624	0.170285	0.0711114
map00410 beta-Alanine metabolism	0.0164588	2.08	A0A5G2RA17	28	K	4.318	0.0102673	Up	Aldehyde dehydrogenase 6 family member A1 OS=Sus scrofa OX=9823 GN=ALDH6A1 PE=1 SV=1	ALDH6A1	K00140	1	0.0118219	86.18	2	LFIGGK(1)FIESK	-1.3209	1.76493	1.61096	0.955402	0.33137	0.337342
map00410 beta-Alanine metabolism	0.0164588	2.08	A0A5G2RA17	57	K	21.395	0.000334485	Up	Aldehyde dehydrogenase 6 family member A1 OS=Sus scrofa OX=9823 GN=ALDH6A1 PE=1 SV=1	ALDH6A1	K00140	1	5.32736e-44	313.31	3	VPQATK(1)AEMDAAVSSCK	-0.45464	2.19362	1.567	1.97148	0.137999	0.0690887	0.060825
map00410 beta-Alanine metabolism	0.0164588	2.08	D2D0E6	151	K	8.729	0.00142869	Up	Malonyl-CoA decarboxylase OS=Sus scrofa OX=9823 GN=MLYCD PE=4 SV=1	MLYCD	K01578	1	0.0136598	61.657	3	SLFHHISK(1)LDGGVR	-2.578	1.93742	1.65143			0.209281	0.201865
map00410 beta-Alanine metabolism	0.0164588	2.08	Q29554	262	K	7.157	0.000148423	Up	Trifunctional enzyme subunit alpha, mitochondrial OS=Sus scrofa OX=9823 GN=HADHA PE=2 SV=1	HADHA	K07515	1	0.0230026	111.39	2	DK(1)GLVEK	1.9227	1.50796	2.12247	1.63404	0.279951	0.203239	0.252339
map00410 beta-Alanine metabolism	0.0164588	2.08	Q29554	337	K	5.135	0.00990179	Up	Trifunctional enzyme subunit alpha, mitochondrial OS=Sus scrofa OX=9823 GN=HADHA PE=2 SV=1	HADHA	K07515	1	0.000273283	140.14	2	ESK(1)ALMGLYR	0.70982	1.50834	1.78929	1.72442	0.593777	0.169854	0.214311
map00410 beta-Alanine metabolism	0.0164588	2.08	Q29554	362	K	12.399	0.00224888	Up	Trifunctional enzyme subunit alpha, mitochondrial OS=Sus scrofa OX=9823 GN=HADHA PE=2 SV=1	HADHA	K07515	1	9.1233e-14	179.64	3	EVK(1)HLAILGAGLMGAGIAQVSVDK	-0.67277	1.6314	1.74674	2.17407	0.222383	0.160488	0.064918
map00410 beta-Alanine metabolism	0.0164588	2.08	Q29554	383	K	19.394	9.94043e-06	Up	Trifunctional enzyme subunit alpha, mitochondrial OS=Sus scrofa OX=9823 GN=HADHA PE=2 SV=1	HADHA	K07515	1	3.28254e-38	274.47	4	HLAILGAGLMGAGIAQVSVDK(1)HLK	-0.1212	2.12967	1.89821	1.67791	0.090733	0.114597	0.0888792
map00410 beta-Alanine metabolism	0.0164588	2.08	Q29554	644	K	15.327	0.0011441	Up	Trifunctional enzyme subunit alpha, mitochondrial OS=Sus scrofa OX=9823 GN=HADHA PE=2 SV=1	HADHA	K07515	1	8.86086e-20	266.58	2	GFYVYQEGVK(1)NR	0.60213	1.48671	2.30343	1.84236	0.198756	0.100973	0.067768
map00410 beta-Alanine metabolism	0.0164588	2.08	Q29554	411	K	11.934	0.000413425	Up	Trifunctional enzyme subunit alpha, mitochondrial OS=Sus scrofa OX=9823 GN=HADHA PE=2 SV=1	HADHA	K07515	1	1.50313e-28	286.45	3	GQQQVFK(1)GLNDK(1)VR	1.615	1.57651	2.0978	1.86178	0.219664	0.140402	0.103844
map00410 beta-Alanine metabolism	0.0164588	2.08	Q29554	309	K	9.663	0.00122596	Up	Trifunctional enzyme subunit alpha, mitochondrial OS=Sus scrofa OX=9823 GN=HADHA PE=2 SV=1	HADHA	K07515	1	5.4447e-28	256.9	3	IIDVVK(1)TGIEQGSDAGYLSESQK	-0.48788	1.59465	1.25306	2.5896	0.237413	0.19424	0.131039
map00410 beta-Alanine metabolism	0.0164588	2.08	Q29554	406	K	5.333	0.000909967	Up	Trifunctional enzyme subunit alpha, mitochondrial OS=Sus scrofa OX=9823 GN=HADHA PE=2 SV=1	HADHA	K07515	1	1.50313e-28	286.45	3	GQQQVFK(1)GLNDK(1)VR	1.615	1.48731	1.95748	1.60773	0.404543	0.222485	0.320456
map00410 beta-Alanine metabolism	0.0164588	2.08	Q29554	350	K	14.935	0.00147652	Up	Trifunctional enzyme subunit alpha, mitochondrial OS=Sus scrofa OX=9823 GN=HADHA PE=2 SV=1	HADHA	K07515	1	0.00182356	143.91	2	GQTLCK(1)K(1)NK	-0.2853	1.30268	1.99373	2.32706	0.21086	0.0863472	0.0793269
map00410 beta-Alanine metabolism	0.0164588	2.08	Q29554	351	K	14.935	0.00147652	Up	Trifunctional enzyme subunit alpha, mitochondrial OS=Sus scrofa OX=9823 GN=HADHA PE=2 SV=1	HADHA	K07515	1	0.00182356	143.91	2	GQTLCK(1)K(1)NK	-0.2853	1.30268	1.99373	2.32706	0.21086	0.0863472	0.0793269
map00410 beta-Alanine metabolism	0.0164588	2.08	Q29554	386	K	12.376	0.0015873	Up	Trifunctional enzyme subunit alpha, mitochondrial OS=Sus scrofa OX=9823 GN=HADHA PE=2 SV=1	HADHA	K07515	1	0.0143054	129.47	2	HLK(1)TILK	-0.23222	1.92691	1.70284	1.92167	0.239517	0.0732694	0.135795
map00410 beta-Alanine metabolism	0.0164588	2.08	Q29554	569	K	6.484	0.000221604	Up	Trifunctional enzyme subunit alpha, mitochondrial OS=Sus scrofa OX=9823 GN=HADHA PE=2 SV=1	HADHA	K07515	1	6.69682e-05	145.17	2	ILQEGVGPK(1)K	-0.45387	1.48643	2.22279	1.4891	0.264961	0.295403	0.241316
map00410 beta-Alanine metabolism	0.0164588	2.08	Q29554	415	K	5.846	0.000430241	Up	Trifunctional enzyme subunit alpha, mitochondrial OS=Sus scrofa OX=9823 GN=HADHA PE=2 SV=1	HADHA	K07515	1	0.0156839	109.71	2	K(1)K(1)ALTSFER	0.00556	1.54473	1.83478	1.74407	0.387967	0.259421	0.22904
map00410 beta-Alanine metabolism	0.0164588	2.08	Q29554	414	K	6.775	0.000281527	Up	Trifunctional enzyme subunit alpha, mitochondrial OS=Sus scrofa OX=9823 GN=HADHA PE=2 SV=1	HADHA	K07515	1	0.0196487	109.71	2	K(1)K(1)ALTSFER	0.00556	1.58979	1.87795	1.76058	0.3357	0.237865	0.198115
map00410 beta-Alanine metabolism	0.0164588	2.08	Q29554	597	K	49.862	0.000225682	Up	Trifunctional enzyme subunit alpha, mitochondrial OS=Sus scrofa OX=9823 GN=HADHA PE=2 SV=1	HADHA	K07515	1	1.99798e-98	345.79	4	LDSLTTSFGFPVGAATLMDEVGMDVAK(1)HVAENLGK	0.19193	1.33536	2.20761	2.33906	0.0270586	0.0610966	0.0298099
map00410 beta-Alanine metabolism	0.0164588	2.08	Q29554	214	K	8.368	0.0165153	Up	Trifunctional enzyme subunit alpha, mitochondrial OS=Sus scrofa OX=9823 GN=HADHA PE=2 SV=1	HADHA	K07515	1	0.000150662	100.08	3	K(1)MGLVDQLVEPLGPGLKPPEER	-0.76534	1.29578	2.1035	1.23176		0.275297	0.0936636
map00410 beta-Alanine metabolism	0.0164588	2.08	Q29554	292	K	7.381	9.84506e-05	Up	Trifunctional enzyme subunit alpha, mitochondrial OS=Sus scrofa OX=9823 GN=HADHA PE=2 SV=1	HADHA	K07515	1	1.84032e-12	234.92	2	K(1)QTK(1)GLYPAPLK	-0.034596	1.4069	1.90507	1.97215	0.272319	0.225776	0.217793
map00410 beta-Alanine metabolism	0.0164588	2.08	Q29554	295	K	7.591	0.00013527	Up	Trifunctional enzyme subunit alpha, mitochondrial OS=Sus scrofa OX=9823 GN=HADHA PE=2 SV=1	HADHA	K07515	1	1.84032e-12	234.92	2	QTK(1)GLYPAPLK(1)IIDVVK	0.38096	1.32944	2.05122	1.92096	0.245202	0.217096	0.236093
map00410 beta-Alanine metabolism	0.0164588	2.08	Q29554	634	K	6.425	0.011437	Up	Trifunctional enzyme subunit alpha, mitochondrial OS=Sus scrofa OX=9823 GN=HADHA PE=2 SV=1	HADHA	K07515	1	5.26918e-05	156.01	2	SGK(1)GFYVYQEGVK	0.6105	1.04396	1.88455	2.26345	0.490762	0.16206	0.155214
map00410 beta-Alanine metabolism	0.0164588	2.08	Q29554	285	K	23.805	0.00153919	Up	Trifunctional enzyme subunit alpha, mitochondrial OS=Sus scrofa OX=9823 GN=HADHA PE=2 SV=1	HADHA	K07515	1	0.00173611	188.81	2	K(1)VEEK(1)VR	-1.2912	1.59953	1.42516	1.83909	0.0920056	0.044207
map00410 beta-Alanine metabolism	0.0164588	2.08	Q29554	289	K	23.805	0.00153919	Up	Trifunctional enzyme subunit alpha, mitochondrial OS=Sus scrofa OX=9823 GN=HADHA PE=2 SV=1	HADHA	K07515	1	0.00173611	188.81	2	K(1)VEEK(1)VR	-1.2912	1.59953	1.42516	1.83909	0.0920056	0.044207
map00410 beta-Alanine metabolism	0.0164588	2.08	Q29554	735	K	3.491	0.0118892	Up	Trifunctional enzyme subunit alpha, mitochondrial OS=Sus scrofa OX=9823 GN=HADHA PE=2 SV=1	HADHA	K07515	1	0.0119138	104.06	2	K(1)YEAIYGK	0.26186	1.23405	2.03733	1.39269	0.638898	0.430363	0.266668
map00410 beta-Alanine metabolism	0.0164588	2.08	Q29554	742	K	7.604	0.0174953	Up	Trifunctional enzyme subunit alpha, mitochondrial OS=Sus scrofa OX=9823 GN=HADHA PE=2 SV=1	HADHA	K07515	1	3.33074e-56	310.9	3	YEAIYGK(1)QFTPCQLLIDHASSPNK	-0.40933	2.1914	0.973562	2.13768	0.472701	0.137778	0.0868798
map00410 beta-Alanine metabolism	0.0164588	2.08	Q29554	534	K	4.968	0.000506262	Up	Trifunctional enzyme subunit alpha, mitochondrial OS=Sus scrofa OX=9823 GN=HADHA PE=2 SV=1	HADHA	K07515	1	0.00874134	105.14	2	QGK(1)VIIVVK	0.043046	1.36823	1.52781	2.09859	0.391651	0.323143	0.290575
map00410 beta-Alanine metabolism	0.0164588	2.08	Q29554	540	K	14.449	0.000158613	Up	Trifunctional enzyme subunit alpha, mitochondrial OS=Sus scrofa OX=9823 GN=HADHA PE=2 SV=1	HADHA	K07515	1	7.99001e-16	250.94	2	VIIVVK(1)DGPGFYTTR	-0.12074	1.60044	2.05039	1.96079	0.178844	0.100987	0.108549
map00410 beta-Alanine metabolism	0.0164588	2.08	Q29554	625	K	7.608	0.00111284	Up	Trifunctional enzyme subunit alpha, mitochondrial OS=Sus scrofa OX=9823 GN=HADHA PE=2 SV=1	HADHA	K07515	1	0.0025854	118.5	2	QMISK(1)GFLGR	-0.27704	1.1603	1.70591	2.43674	0.275322	0.229837	0.191894
map00410 beta-Alanine metabolism	0.0164588	2.08	Q29554	505	K	6.295	0.000205172	Up	Trifunctional enzyme subunit alpha, mitochondrial OS=Sus scrofa OX=9823 GN=HADHA PE=2 SV=1	HADHA	K07515	1	1.51822e-08	153.88	3	VIGMHYFSPVDK(1)MQLLEIITTEK(1)TSK	-0.39814	1.33542	1.74453	2.09761	0.265787	0.302348	0.254302
map00410 beta-Alanine metabolism	0.0164588	2.08	Q29554	46	K	8.052	0.000393129	Up	Trifunctional enzyme subunit alpha, mitochondrial OS=Sus scrofa OX=9823 GN=HADHA PE=2 SV=1	HADHA	K07515	1	3.54276e-40	307.15	3	THINYGVK(1)GDVAVIR	-0.22291	1.61211	1.97531	1.74975	0.298486	0.205942	0.158402
map00410 beta-Alanine metabolism	0.0164588	2.08	Q29554	249	K	26.732	0.000913743	Up	Trifunctional enzyme subunit alpha, mitochondrial OS=Sus scrofa OX=9823 GN=HADHA PE=2 SV=1	HADHA	K07515	1	1.15063e-11	195.1	2	TIEYLEEVAVTFAK(1)GLADK	0.45096	1.91777	1.70262	1.25795	0.0458436		0.0758183
map00564 Glycerophospholipid metabolism	0.492932	1.3	A0A287BF92	236	K	11.889	0.0300394	Up	Phospholipase A2 group VI OS=Sus scrofa OX=9823 GN=PLA2G6 PE=4 SV=2	PLA2G6	K16343	1	0.000130946	113.47	3	YGASPLHWAK(1)NAEMAR	0.060125	0.922931	0.728278	3.0833	0.147061		0.118426
map00564 Glycerophospholipid metabolism	0.492932	1.3	I3L6E7	204	K	7.502	0.00359338	Up	Phosphoethanolamine/phosphocholine phosphatase isoform 1 OS=Sus scrofa OX=9823 GN=PHOSPHO1 PE=3 SV=2	PHOSPHO1	K06124	1	3.20692e-06	215.38	2	HK(1)VLSDYLR	-0.61913	1.90621	1.42419	1.96391	0.398911	0.133244	0.173539
map00564 Glycerophospholipid metabolism	0.492932	1.3	A0A5G2RCG0	89	K	7.135	0.0305772	Up	Lysophospholipase 1 OS=Sus scrofa OX=9823 GN=LYPLA1 PE=1 SV=1	LYPLA1	K06128	1	3.87782e-30	289.86	2	SLIEQEVK(1)NGIPSNR	-0.97444		1.62167	2.5098	0.53972	0.144835	0.183968
map00564 Glycerophospholipid metabolism	0.492932	1.3	F1RW19	1022	K	31.119	0.00375724	Up	Diacylglycerol kinase OS=Sus scrofa OX=9823 GN=DGKK PE=3 SV=3	DGKK	K00901	1	0.0217322	85.212	2	YK(1)NAAQMLTR	-2.3726	1.54728	0.936623	2.41123	0.0672823	0.0375866
map00620 Pyruvate metabolism	0.00245738	1.85	A0A287ADK3	409	K	17.969	0.0215392	Up	Aldehyde dehydrogenase (NAD(+)) OS=Sus scrofa OX=9823 GN=ALDH7A1 PE=1 SV=1	ALDH7A1	K14085	1	5.53261e-40	301.93	3	FK(1)NEDEVFAWNNEVK	-0.20014	1.56962	0.998956	2.25255	0.152374	0.0264957
map00620 Pyruvate metabolism	0.00245738	1.85	A0A287ADK3	322	K	11.332	0.000279857	Up	Aldehyde dehydrogenase (NAD(+)) OS=Sus scrofa OX=9823 GN=ALDH7A1 PE=1 SV=1	ALDH7A1	K14085	1	0.00984518	102.95	2	LTK(1)AYAQIR	-0.33877	1.5294	2.12202	1.86203	0.224637	0.125655	0.136265
map00620 Pyruvate metabolism	0.00245738	1.85	A0A5G2QSJ2	26	K	17.709	9.98356e-05	Up	Malic enzyme OS=Sus scrofa OX=9823 GN=ME2 PE=1 SV=1	ME2	K00027	1	0.0145788	93.561	2	GK(1)PLMLNPR	-0.080455	1.57066	1.79208	2.31657	0.138349	0.0978257	0.0845245
map00620 Pyruvate metabolism	0.00245738	1.85	A0A5G2QSJ2	300	K	7.223	0.0341106	Up	Malic enzyme OS=Sus scrofa OX=9823 GN=ME2 PE=1 SV=1	ME2	K00027	1	0.0274695	44.945	3	VIGK(1)SISEHK	-0.089299		1.16285	2.3507	0.22051		0.265932
map00620 Pyruvate metabolism	0.00245738	1.85	A0A287AAI9	256	K	11.664	0.00144674	Up	Hydroxyacylglutathione hydrolase OS=Sus scrofa OX=9823 GN=HAGH PE=1 SV=1	HAGH	K01069	1	0.0010819	174.02	2	DHFK(1)VPR	-0.037932	1.88016	1.10796	2.53808	0.219969	0.112426	0.141406
map00620 Pyruvate metabolism	0.00245738	1.85	A0A287B2H7	43	K	6.535	0.0122783	Up	L-lactate dehydrogenase OS=Sus scrofa OX=9823 GN=LDHA PE=3 SV=1	LDHA	K00016	1	2.50729e-11	191.95	3	DQLIHNLLK(1)EEHVPHNK	-0.46433	1.51358	1.54076	2.14935	0.530619	0.150079	0.115608
map00620 Pyruvate metabolism	0.00245738	1.85	A0A287B2H7	27	K	9.41	0.000640596	Up	L-lactate dehydrogenase OS=Sus scrofa OX=9823 GN=LDHA PE=3 SV=1	LDHA	K00016	1	8.76591e-06	204	2	IPFGSK(1)STMATLK	0.09702	1.57728	1.35798	2.48837	0.244205	0.181847	0.150321
map00620 Pyruvate metabolism	0.00245738	1.85	A0A287B2H7	88	K	8.849	0.00786298	Up	L-lactate dehydrogenase OS=Sus scrofa OX=9823 GN=LDHA PE=3 SV=1	LDHA	K00016	1	9.045e-09	201.3	3	LK(1)GEMMDLQHGSLFLR	-0.87575	1.08174	1.39151	2.17644	0.225115	0.125195
map00620 Pyruvate metabolism	0.00245738	1.85	A0A287B2H7	253	K	4.195	0.0188506	Up	L-lactate dehydrogenase OS=Sus scrofa OX=9823 GN=LDHA PE=3 SV=1	LDHA	K00016	1	0.000666693	98.572	3	NLHPELGTDADK(1)EHWK	0.4551	1.43181	0.955315	2.45789	0.557872	0.36457	0.232546
map00620 Pyruvate metabolism	0.00245738	1.85	A0A287B2H7	105	K	3.079	0.0390578	Up	L-lactate dehydrogenase OS=Sus scrofa OX=9823 GN=LDHA PE=3 SV=1	LDHA	K00016	1	0.0116506	110.79	2	TPK(1)IVSGK	-1.0115	1.08917	1.65129	1.36967	0.61528		0.274596
map00620 Pyruvate metabolism	0.00245738	1.85	A0A287B2H7	346	K	4.975	0.00557657	Up	L-lactate dehydrogenase OS=Sus scrofa OX=9823 GN=LDHA PE=3 SV=1	LDHA	K00016	1	7.50937e-05	156.48	2	VTLTPEEEAHLK(1)K	-0.11169	1.82187		2.01984	0.517976	0.285752	0.354564
map00620 Pyruvate metabolism	0.00245738	1.85	Q2XQV4	432	K	9.995	0.00100617	Up	Aldehyde dehydrogenase, mitochondrial OS=Sus scrofa OX=9823 GN=ALDH2 PE=2 SV=1	ALDH2	K00128	1	0.000171453	152.34	2	FK(1)TIEEVIGR	0.50264	1.99671	2.16627	1.29131	0.17112	0.119906	0.254688
map00620 Pyruvate metabolism	0.00245738	1.85	Q2XQV4	379	K	12.974	0.00838091	Up	Aldehyde dehydrogenase, mitochondrial OS=Sus scrofa OX=9823 GN=ALDH2 PE=2 SV=1	ALDH2	K00128	1	0.0325645	76.827	2	ILGYIK(1)SGK	-0.12652	1.15901	1.47018	2.12645	0.176825		0.0675384
map00620 Pyruvate metabolism	0.00245738	1.85	Q2XQV4	372	K	9.488	0.00431005	Up	Aldehyde dehydrogenase, mitochondrial OS=Sus scrofa OX=9823 GN=ALDH2 PE=2 SV=1	ALDH2	K00128	1	2.41837e-50	323.66	3	TEQGPQIDETQFK(1)K	-0.047026	1.28049	2.31628	1.83114	0.340705	0.103428	0.127952
map00620 Pyruvate metabolism	0.00245738	1.85	Q2XQV4	280	K	23.305	0.000824426	Up	Aldehyde dehydrogenase, mitochondrial OS=Sus scrofa OX=9823 GN=ALDH2 PE=2 SV=1	ALDH2	K00128	1	7.71847e-125	406.71	2	VAFTGSTEVGHLIQVAAGK(1)SNLK	-0.42648	1.48516	2.13671	1.23907	0.078186	0.0608686
map00620 Pyruvate metabolism	0.00245738	1.85	Q2XQV4	159	K	13.142	0.0225955	Up	Aldehyde dehydrogenase, mitochondrial OS=Sus scrofa OX=9823 GN=ALDH2 PE=2 SV=1	ALDH2	K00128	1	0.000621756	134.59	2	YYAGWADK(1)YHGK	-1.8788	0.940432	0.941935	2.87624	0.170285	0.0711114
map00620 Pyruvate metabolism	0.00245738	1.85	A0A5G2QGS5	189	K	7.57	0.00461557	Up	Acetyl-CoA acetyltransferase 1 OS=Sus scrofa OX=9823 GN=ACAT1 PE=1 SV=1	ACAT1	K00626	1	1.45144e-17	199.61	3	DGLTDVYNK(1)IHMGNCAENTAK	-0.045735	2.1555	2.01764		0.377836	0.183822	0.265202
map00620 Pyruvate metabolism	0.00245738	1.85	A0A5G2QGS5	244	K	12.716	0.000615442	Up	Acetyl-CoA acetyltransferase 1 OS=Sus scrofa OX=9823 GN=ACAT1 PE=1 SV=1	ACAT1	K00626	1	9.35826e-08	212.59	2	GK(1)PDTVVKEDEEYKR	-0.14921	1.5701	1.94238	2.05008	0.221611	0.121732	0.0940989
map00620 Pyruvate metabolism	0.00245738	1.85	A0A5G2QGS5	250	K	11.974	0.0032655	Up	Acetyl-CoA acetyltransferase 1 OS=Sus scrofa OX=9823 GN=ACAT1 PE=1 SV=1	ACAT1	K00626	1	8.23212e-40	308.74	2	GKPDTVVK(1)EDEEYKR	0.19203	1.50355	1.55256	1.68019	0.181169		0.0825359
map00620 Pyruvate metabolism	0.00245738	1.85	A0A5G2QGS5	267	K	12.183	0.0100254	Up	Acetyl-CoA acetyltransferase 1 OS=Sus scrofa OX=9823 GN=ACAT1 PE=1 SV=1	ACAT1	K00626	1	0.00533267	173.11	2	LK(1)TVFQK	0.48107	1.52684	1.38348	1.83026	0.198907		0.0605114
map00620 Pyruvate metabolism	0.00245738	1.85	A0A5G2QGS5	123	K	2.893	0.00648098	Up	Acetyl-CoA acetyltransferase 1 OS=Sus scrofa OX=9823 GN=ACAT1 PE=1 SV=1	ACAT1	K00626	1	4.41462e-10	151.42	3	QAVLGAGLPISTPCTTINK(1)VCASGMK	1.4209	1.05519	1.54805	1.46041	0.464522		0.471823
map00620 Pyruvate metabolism	0.00245738	1.85	A0A5G2QGS5	222	K	11.922	0.00257753	Up	Acetyl-CoA acetyltransferase 1 OS=Sus scrofa OX=9823 GN=ACAT1 PE=1 SV=1	ACAT1	K00626	1	0.0158276	91.085	2	SK(1)AAWEAGK	-0.74953	2.24838	2.19285		0.26981	0.14756	0.141401
map00620 Pyruvate metabolism	0.00245738	1.85	A0A5G2QGS5	262	K	25.223	0.000792457	Up	Acetyl-CoA acetyltransferase 1 OS=Sus scrofa OX=9823 GN=ACAT1 PE=1 SV=1	ACAT1	K00626	1	0.00402759	132.57	2	VDFNK(1)VPK	0.10583	1.23796	1.78037	1.85292		0.0781217	0.050632
map00620 Pyruvate metabolism	0.00245738	1.85	A0A5G2QIE6	270	K	8.54	0.0212944	Up	Acetyltransferase component of pyruvate dehydrogenase complex OS=Sus scrofa OX=9823 GN=DLAT PE=1 SV=1	DLAT	K00627	1	4.7975e-11	229.29	2	GIDLTQIK(1)GTGPDGR	-0.11319	1.09551	1.33998	2.20244	0.27587	0.0862052
map00620 Pyruvate metabolism	0.00245738	1.85	A0A5G2QIE6	367	K	18.394	2.74021e-05	Up	Acetyltransferase component of pyruvate dehydrogenase complex OS=Sus scrofa OX=9823 GN=DLAT PE=1 SV=1	DLAT	K00627	1	6.71423e-05	143.4	2	SK(1)ISVNDFIIK	0.035448	1.45822	2.10129	2.13112	0.0930524	0.105726	0.110598
map00620 Pyruvate metabolism	0.00245738	1.85	A0A5G2QPK6	58	K	14.471	0.00105459	Up	Dihydrolipoyl dehydrogenase OS=Sus scrofa OX=9823 GN=DLD PE=1 SV=1	DLD	K00382	1	6.98919e-05	196.48	2	AAQLGFK(1)TVCIEK	0.0011054	1.63951	1.56697	2.40569	0.205739	0.0759641	0.106127
map00620 Pyruvate metabolism	0.00245738	1.85	A0A5G2QPK6	96	K	7.669	0.00101237	Up	Dihydrolipoyl dehydrogenase OS=Sus scrofa OX=9823 GN=DLD PE=1 SV=1	DLD	K00382	1	6.69026e-49	313.04	4	ALLNNSHYYHMAHGK(1)DFASR	0.81498	1.90275	1.34769	2.05746	0.18081	0.180116	0.331169
map00620 Pyruvate metabolism	0.00245738	1.85	A0A5G2QPK6	135	K	2.712	0.0179189	Up	Dihydrolipoyl dehydrogenase OS=Sus scrofa OX=9823 GN=DLD PE=1 SV=1	DLD	K00382	1	2.83008e-140	407.16	3	SNAVK(1)ALTGGIAHLFK(1)QNK	-0.511	1.39969	1.94509	1.03871	0.37931	0.71524	0.52196
map00620 Pyruvate metabolism	0.00245738	1.85	A0A5G2QPK6	409	K	4.416	0.00806848	Up	Dihydrolipoyl dehydrogenase OS=Sus scrofa OX=9823 GN=DLD PE=1 SV=1	DLD	K00382	1	9.81057e-41	315.21	2	EEGIEYK(1)VGK	0.0090722	1.65767	1.73328	1.50127	0.597975	0.312334	0.197473
map00620 Pyruvate metabolism	0.00245738	1.85	A0A5G2QPK6	269	K	10.152	0.000750656	Up	Dihydrolipoyl dehydrogenase OS=Sus scrofa OX=9823 GN=DLD PE=1 SV=1	DLD	K00382	1	0.00021351	178.55	2	LNTK(1)VIGATK	-0.50256	1.41263	1.84138	2.20799	0.246217	0.175624	0.11616
map00620 Pyruvate metabolism	0.00245738	1.85	A0A5G2QPK6	338	K	5.662	0.00569049	Up	Dihydrolipoyl dehydrogenase OS=Sus scrofa OX=9823 GN=DLD PE=1 SV=1	DLD	K00382	1	2.12613e-09	154.65	3	FQTK(1)IPNIYAIGDVVAGPMLAHK	-0.4543	1.04519	1.32725	2.7269	0.242605	0.311758	0.346298
map00620 Pyruvate metabolism	0.00245738	1.85	A0A5G2QPK6	259	K	4.306	0.00171738	Up	Dihydrolipoyl dehydrogenase OS=Sus scrofa OX=9823 GN=DLD PE=1 SV=1	DLD	K00382	1	0.000942284	135.83	2	ILQK(1)QGFK(1)FK	-0.29711	1.38859	1.8666	1.61407	0.515362	0.282005	0.333363
map00620 Pyruvate metabolism	0.00245738	1.85	A0A5G2QPK6	151	K	12.703	0.000528701	Up	Dihydrolipoyl dehydrogenase OS=Sus scrofa OX=9823 GN=DLD PE=1 SV=1	DLD	K00382	1	5.05413e-10	201.61	3	ITGK(1)NQVTATK(1)ADGSTEVINTK	0.16389	1.75435	1.80692	2.00089	0.222108	0.0946223	0.121115
map00620 Pyruvate metabolism	0.00245738	1.85	A0A5G2QPK6	158	K	21.78	0.00019812	Up	Dihydrolipoyl dehydrogenase OS=Sus scrofa OX=9823 GN=DLD PE=1 SV=1	DLD	K00382	1	9.13913e-100	377.19	2	NQVTATK(1)ADGSTEVINTK	-0.156	1.61789	2.19801	1.92072	0.121481	0.0855181	0.0563852
map00620 Pyruvate metabolism	0.00245738	1.85	A0A5G2QPK6	119	K	12.123	0.00472041	Up	Dihydrolipoyl dehydrogenase OS=Sus scrofa OX=9823 GN=DLD PE=1 SV=1	DLD	K00382	1	9.06167e-05	179.1	2	MMEQK(1)SNAVK	-0.32445	1.39617	0.839096	3.30751	0.181401	0.130613	0.145213
map00620 Pyruvate metabolism	0.00245738	1.85	A0A5G2QPK6	124	K	11.949	0.0040856	Up	Dihydrolipoyl dehydrogenase OS=Sus scrofa OX=9823 GN=DLD PE=1 SV=1	DLD	K00382	1	1.49524e-09	167.14	3	SNAVK(1)ALTGGIAHLFK(1)QNK	-0.511	2.07125	0.955968	1.70857	0.123067	0.141145
map00620 Pyruvate metabolism	0.00245738	1.85	A0A5G2QPK6	402	K	2.117	0.0256796	Up	Dihydrolipoyl dehydrogenase OS=Sus scrofa OX=9823 GN=DLD PE=1 SV=1	DLD	K00382	1	6.03025e-06	209.19	2	SEEQLK(1)EEGIEYK	0.28517	1.32037	1.83202	0.922558	0.625911	0.712405	0.586733
map00620 Pyruvate metabolism	0.00245738	1.85	A0A5G2R718	34	K	6.023	0.0316931	Up	Pyruvate dehydrogenase E1 component subunit beta OS=Sus scrofa OX=9823 GN=PDHB PE=1 SV=1	PDHB	K00162	1	1.04594e-20	167.61	4	DAINQGMDEELERDEK(1)VFLLGEEVAQYDGAYK	-0.31808	1.03207	2.48971	0.97998	0.326682		0.171565
map00620 Pyruvate metabolism	0.00245738	1.85	A0A5G2R718	50	K	6.433	0.000338382	Up	Pyruvate dehydrogenase E1 component subunit beta OS=Sus scrofa OX=9823 GN=PDHB PE=1 SV=1	PDHB	K00162	1	2.1295e-55	321.67	3	VFLLGEEVAQYDGAYK(1)VSR	-0.11923	1.30726	1.5305	1.69276	0.241922	0.227567
map00620 Pyruvate metabolism	0.00245738	1.85	A0A5G2R718	336	K	25.703	0.000583753	Up	Pyruvate dehydrogenase E1 component subunit beta OS=Sus scrofa OX=9823 GN=PDHB PE=1 SV=1	PDHB	K00162	1	0.0255332	92.307	3	ILEDNSVPQVK(1)DIIFAIK(1)K	0.31701	1.47854	1.75327	2.5435	0.122807	0.0521125	0.0497732
map00620 Pyruvate metabolism	0.00245738	1.85	A0A5G2R718	170	K	11.034	0.000616898	Up	Pyruvate dehydrogenase E1 component subunit beta OS=Sus scrofa OX=9823 GN=PDHB PE=1 SV=1	PDHB	K00162	1	0.00690861	120.65	2	GLIK(1)SAIR	-0.50635	1.84458	1.33623	2.32059	0.233349	0.133349	0.131903
map00620 Pyruvate metabolism	0.00245738	1.85	A0A5G2R718	240	K	6.879	0.0205121	Up	Pyruvate dehydrogenase E1 component subunit beta OS=Sus scrofa OX=9823 GN=PDHB PE=1 SV=1	PDHB	K00162	1	2.61644e-25	205.84	4	PVGHCLEAATVLSK(1)EGIECEVINMR	-0.21928	1.99621	1.82199	0.740027	0.215947		0.22583
map00620 Pyruvate metabolism	0.00245738	1.85	A0A5G2R718	166	K	14.707	0.00444135	Up	Pyruvate dehydrogenase E1 component subunit beta OS=Sus scrofa OX=9823 GN=PDHB PE=1 SV=1	PDHB	K00162	1	8.42777e-07	162.68	3	VVSPWSSEDAK(1)GLIK	-0.13568	1.72959		2.80764	0.214388	0.151972	0.0964119
map00620 Pyruvate metabolism	0.00245738	1.85	F1STS4	558	K	31.508	0.00809779	Up	Malic enzyme OS=Sus scrofa OX=9823 GN=ME3 PE=1 SV=3	ME3	K00029	1	1.25177e-25	261.84	2	VLDYAYK(1)HNLASYYPEPK	-0.80973	1.04606	0.958287	2.89205	0.0705405		0.0330619
map00620 Pyruvate metabolism	0.00245738	1.85	P00346	185	K	4.208	0.0079468	Up	Malate dehydrogenase, mitochondrial OS=Sus scrofa OX=9823 GN=MDH2 PE=1 SV=2	MDH2	K00026	1	5.48131e-07	235.31	2	ANAFVAELK(1)GLDPAR	-1.0124	1.1204	1.7119	2.0157	0.419117	0.504961	0.227921
map00620 Pyruvate metabolism	0.00245738	1.85	P00346	329	K	2.438	0.0034956	Up	Malate dehydrogenase, mitochondrial OS=Sus scrofa OX=9823 GN=MDH2 PE=1 SV=2	MDH2	K00026	1	2.53614e-05	156.12	2	K(1)GEEFVK(1)NMK	-0.30892	1.3538	1.67353	1.22748	0.638771	0.647366	0.459058
map00620 Pyruvate metabolism	0.00245738	1.85	P00346	335	K	21.913	0.00181697	Up	Malate dehydrogenase, mitochondrial OS=Sus scrofa OX=9823 GN=MDH2 PE=1 SV=2	MDH2	K00026	1	8.16366e-28	294.13	2	K(1)GEEFVK(1)NMK	-0.30892	2.1044	1.80614	1.8276	0.170394	0.0405965	0.0508696
map00620 Pyruvate metabolism	0.00245738	1.85	P00346	78	K	2.603	0.0170854	Up	Malate dehydrogenase, mitochondrial OS=Sus scrofa OX=9823 GN=MDH2 PE=1 SV=2	MDH2	K00026	1	5.50756e-26	273.66	3	ATVK(1)GYLGPEQLPDCLK	-0.80394	1.63839	1.35052	1.34578	0.679153	0.666441	0.319713
map00620 Pyruvate metabolism	0.00245738	1.85	P00346	279	K	15.425	0.00635621	Up	Malate dehydrogenase, mitochondrial OS=Sus scrofa OX=9823 GN=MDH2 PE=1 SV=2	MDH2	K00026	1	3.3385e-13	159.66	3	EGVVECSFVK(1)SQETDCPYFSTPLLLGK	0.36992	1.30254	1.34379	2.14652	0.149394		0.0577535
map00620 Pyruvate metabolism	0.00245738	1.85	P00346	301	K	16.907	0.000280571	Up	Malate dehydrogenase, mitochondrial OS=Sus scrofa OX=9823 GN=MDH2 PE=1 SV=2	MDH2	K00026	1	0.000198873	203.02	2	K(1)GIEK(1)NLGIGK	0.40642	1.55129	1.88671	2.22695	0.158934	0.100258	0.0758711
map00620 Pyruvate metabolism	0.00245738	1.85	P00346	215	K	9.282	0.00463831	Up	Malate dehydrogenase, mitochondrial OS=Sus scrofa OX=9823 GN=MDH2 PE=1 SV=2	MDH2	K00026	1	4.23192e-111	382.37	3	TIIPLISQCTPK(1)VDFPQDQLSTLTGR	0.59884	1.61915	0.976929	2.06888		0.168183	0.166858
map00620 Pyruvate metabolism	0.00245738	1.85	P00346	45	K	21.045	0.00475866	Up	Malate dehydrogenase, mitochondrial OS=Sus scrofa OX=9823 GN=MDH2 PE=1 SV=2	MDH2	K00026	1	4.41979e-47	292.41	3	VAVLGASGGIGQPLSLLLK(1)NSPLVSR	0.52314	1.71682	0.763961	3.24705	0.143132	0.0813776	0.0476549
map00620 Pyruvate metabolism	0.00245738	1.85	P00346	203	K	3.403	0.00741222	Up	Malate dehydrogenase, mitochondrial OS=Sus scrofa OX=9823 GN=MDH2 PE=1 SV=2	MDH2	K00026	1	1.30613e-09	153.24	3	VSVPVIGGHAGK(1)TIIPLISQCTPK	-0.18212	1.33607	1.44826	1.39667	0.306724		0.512277
map00620 Pyruvate metabolism	0.00245738	1.85	I3LCI2	244	K	14.326	7.06486e-05	Up	Pyruvate dehydrogenase E1 component subunit alpha OS=Sus scrofa OX=9823 GN=PDHA1 PE=1 SV=2	PDHA1	K00161	1	0.000402517	172.21	2	AAASTDYYK(1)R	0.24715	2.1465	1.89941	1.56258	0.162102	0.104595	0.124807
map00620 Pyruvate metabolism	0.00245738	1.85	I3LCI2	83	K	2.468	0.0111998	Up	Pyruvate dehydrogenase E1 component subunit alpha OS=Sus scrofa OX=9823 GN=PDHA1 PE=1 SV=2	PDHA1	K00161	1	2.11455e-13	245.15	3	RMELK(1)ADQLYK(1)QK	-0.75819	1.26937	1.80276	1.19758	0.410631	0.633634	0.686031
map00620 Pyruvate metabolism	0.00245738	1.85	I3LCI2	85	K	9.005	0.000162366	Up	Pyruvate dehydrogenase E1 component subunit alpha OS=Sus scrofa OX=9823 GN=PDHA1 PE=1 SV=2	PDHA1	K00161	1	0.000436708	138.22	2	ADQLYK(1)QK(1)IIR	-0.94509	1.44813	1.61689	2.33528	0.182028	0.226178	0.19149
map00620 Pyruvate metabolism	0.00245738	1.85	I3LCI2	149	K	30.357	0.00264492	Up	Pyruvate dehydrogenase E1 component subunit alpha OS=Sus scrofa OX=9823 GN=PDHA1 PE=1 SV=2	PDHA1	K00161	1	0.000497327	166.66	2	GK(1)GGSMHMYAK	-0.26957	1.20887	1.1745	2.50919		0.0416124	0.0658308
map00620 Pyruvate metabolism	0.00245738	1.85	I3LCI2	77	K	7.793	0.000756203	Up	Pyruvate dehydrogenase E1 component subunit alpha OS=Sus scrofa OX=9823 GN=PDHA1 PE=1 SV=2	PDHA1	K00161	1	2.11455e-13	245.15	3	RMELK(1)ADQLYK(1)QK	-0.75819	1.64932	1.96265	1.70571	0.290556	0.25052	0.141251
map00620 Pyruvate metabolism	0.00245738	1.85	I3LCI2	321	K	7.822	0.000142572	Up	Pyruvate dehydrogenase E1 component subunit alpha OS=Sus scrofa OX=9823 GN=PDHA1 PE=1 SV=2	PDHA1	K00161	1	7.16903e-05	200.93	2	SK(1)SDPIMLLK(1)DR	-0.73938	1.52532	2.28207	1.51246	0.220389	0.247774	0.211984
map00620 Pyruvate metabolism	0.00245738	1.85	I3LCI2	277	K	5.209	0.00236988	Up	Pyruvate dehydrogenase E1 component subunit alpha OS=Sus scrofa OX=9823 GN=PDHA1 PE=1 SV=2	PDHA1	K00161	1	2.82417e-14	251.03	2	SGK(1)GPILMELQTYR	2.0211	1.31828	1.80506	1.30939		0.244799	0.322474
map00620 Pyruvate metabolism	0.00245738	1.85	I3LCI2	313	K	13.059	0.000364323	Up	Pyruvate dehydrogenase E1 component subunit alpha OS=Sus scrofa OX=9823 GN=PDHA1 PE=1 SV=2	PDHA1	K00161	1	4.7682e-05	200.93	2	SK(1)SDPIMLLK(1)DR	-0.73938	1.98833	2.05998	1.5249	0.20686	0.115592	0.104335
map00620 Pyruvate metabolism	0.00245738	1.85	A0A5S8M9X9	71	K	14.844	0.000627111	Up	Fumarate hydratase, mitochondrial OS=Sus scrofa OX=9823 GN=FH PE=3 SV=1	FH	K01679	1	1.68715e-48	303.36	3	AAAEVNQDYGLDPK(1)IANAIMK(1)AADEVAEGK	1.2008	1.38339	1.65837	1.74333		0.129454	0.0854523
map00620 Pyruvate metabolism	0.00245738	1.85	A0A5S8M9X9	56	K	5.518	0.0261446	Up	Fumarate hydratase, mitochondrial OS=Sus scrofa OX=9823 GN=FH PE=3 SV=1	FH	K01679	1	0.0109192	137.5	2	AFGILK(1)R	-0.4578	1.06877	1.27778	2.73296	0.595088	0.189005	0.136393
map00620 Pyruvate metabolism	0.00245738	1.85	A0A5S8M9X9	22	K	4.876	0.00417011	Up	Fumarate hydratase, mitochondrial OS=Sus scrofa OX=9823 GN=FH PE=3 SV=1	FH	K01679	1	2.42228e-06	216.03	2	VPNDK(1)YYGAQTVR	0.52785	1.48856	1.69062	1.79973	0.539996	0.263859	0.217226
map00620 Pyruvate metabolism	0.00245738	1.85	A0A5S8M9X9	219	K	4.441	0.0117321	Up	Fumarate hydratase, mitochondrial OS=Sus scrofa OX=9823 GN=FH PE=3 SV=1	FH	K01679	1	0.0167131	120.9	2	IK(1)AAMPR	0.27225	1.16263	1.86991	1.86477	0.625706	0.248212	0.22877
map00620 Pyruvate metabolism	0.00245738	1.85	A0A5S8M9X9	177	K	2.605	0.0147555	Up	Fumarate hydratase, mitochondrial OS=Sus scrofa OX=9823 GN=FH PE=3 SV=1	FH	K01679	1	0.000232823	166.07	2	LHDALDAK(1)SR	-0.50949	1.43174	1.13308	1.77091	0.773685	0.502662	0.387927
map00620 Pyruvate metabolism	0.00245738	1.85	F1RUV5	261	K	33.147	0.00597187	Up	Pyruvate carboxylase OS=Sus scrofa OX=9823 GN=PC PE=1 SV=4	PC	K01958	1	0.000408943	121.01	3	HGK(1)HYFIEVNSR	0.008484	0.893116	1.20458	2.80373	0.0625295	0.0360506
map00620 Pyruvate metabolism	0.00245738	1.85	F1SFX0	228	K	7.402	0.0103166	Up	L-lactate dehydrogenase OS=Sus scrofa OX=9823 GN=LDHC PE=2 SV=2	LDHC	K00016	1	3.09141e-114	393.33	2	DQWK(1)NIHK	-0.90744	1.1003	1.10626	2.38033	0.220709	0.192398
map00620 Pyruvate metabolism	0.00245738	1.85	F1SFX0	81	K	3.789	0.00124263	Up	L-lactate dehydrogenase OS=Sus scrofa OX=9823 GN=LDHC PE=2 SV=2	LDHC	K00016	1	3.39125e-06	202.27	2	IVSGK(1)DYSVSANSK	-0.80078	1.16144	1.68393	1.90164	0.469981	0.405258	0.377748
map00620 Pyruvate metabolism	0.00245738	1.85	F1SFX0	224	K	7.918	0.00282901	Up	L-lactate dehydrogenase OS=Sus scrofa OX=9823 GN=LDHC PE=2 SV=2	LDHC	K00016	1	5.23224e-06	218.58	2	LGTDSDK(1)DQWK	0.052794	1.91094	1.2493	2.16694	0.356349	0.141774	0.174711
map00620 Pyruvate metabolism	0.00245738	1.85	F1SFX0	217	K	9.568	0.00607823	Up	L-lactate dehydrogenase OS=Sus scrofa OX=9823 GN=LDHC PE=2 SV=2	LDHC	K00016	1	1.48714e-15	251.84	2	TLDPK(1)LGTDSDKDQWK	0.3983	2.12055	2.20182		0.348453	0.181568	0.147612
map00620 Pyruvate metabolism	0.00245738	1.85	F1SFX0	278	K	2.695	0.0275503	Up	L-lactate dehydrogenase OS=Sus scrofa OX=9823 GN=LDHC PE=2 SV=2	LDHC	K00016	1	1.22758e-06	178.1	3	VHPVSTMVK(1)GLYGIK	-0.54755	1.1205	1.22741	2.02824	0.774817	0.504547	0.344485
map00630 Glyoxylate and dicarboxylate metabolism	0.170892	1.48	A0A286ZKX2	300	K	11.202	0.0055965	Up	Citrate synthase OS=Sus scrofa OX=9823 GN=CS PE=1 SV=2	CS	K01647	1	1.73459e-28	278.46	3	EFALK(1)HLPHDPMFK(1)LVAQLYK	-1.0265	1.42984	1.06203	2.22729	0.17496	0.105883
map00630 Glyoxylate and dicarboxylate metabolism	0.170892	1.48	A0A286ZKX2	261	K	6.967	0.00107078	Up	Citrate synthase OS=Sus scrofa OX=9823 GN=CS PE=1 SV=2	CS	K01647	1	0.000435385	180.19	2	EVGK(1)DVSDEK(1)LR	0.024181	1.6625	1.21279	1.68807		0.199637	0.237013
map00630 Glyoxylate and dicarboxylate metabolism	0.170892	1.48	A0A286ZKX2	10	K	3.416	0.0103028	Up	Citrate synthase OS=Sus scrofa OX=9823 GN=CS PE=1 SV=2	CS	K01647	1	2.35703e-44	311.16	3	GMK(1)GLVYETSVLDPDEGIR	-0.175	1.84707	0.987122	1.80725	0.605377	0.415618	0.337565
map00630 Glyoxylate and dicarboxylate metabolism	0.170892	1.48	A0A286ZKX2	149	K	15.578	0.00305084	Up	Citrate synthase OS=Sus scrofa OX=9823 GN=CS PE=1 SV=2	CS	K01647	1	0.000178216	176.41	2	LPCVAAK(1)IYR	-1.1435	1.45216	1.36474	1.97791	0.139435	0.0657563
map00630 Glyoxylate and dicarboxylate metabolism	0.170892	1.48	A0A286ZKX2	384	K	20.521	0.000906857	Up	Citrate synthase OS=Sus scrofa OX=9823 GN=CS PE=1 SV=2	CS	K01647	1	0.000201952	199.03	2	PK(1)SMSTDGLIK	-0.20974	1.44115	1.61269	1.78883	0.100677	0.0566491
map00630 Glyoxylate and dicarboxylate metabolism	0.170892	1.48	A0A287AFJ1	427	K	9.92	0.0027271	Up	Glutamine synthetase OS=Sus scrofa OX=9823 GN=GLUL PE=1 SV=1	GLUL	K01915	1	3.95046e-05	163.65	2	AYDPK(1)GGLDNAR	0.34881	2.00942	1.28014	2.161	0.307847	0.107117	0.13447
map00630 Glyoxylate and dicarboxylate metabolism	0.170892	1.48	A0A287AFJ1	59	K	7.425	0.00135029	Up	Glutamine synthetase OS=Sus scrofa OX=9823 GN=GLUL PE=1 SV=1	GLUL	K01915	1	9.68841e-06	138.05	3	IK(1)SLTHQPSYSCSSR	-0.35705	1.69603	1.21179	2.37999	0.31582	0.190291	0.206072
map00630 Glyoxylate and dicarboxylate metabolism	0.170892	1.48	A0A287AFJ1	395	K	9.373	0.00660517	Up	Glutamine synthetase OS=Sus scrofa OX=9823 GN=GLUL PE=1 SV=1	GLUL	K01915	1	1.58707e-18	214.69	3	PIPGNWNGAGCHTNFSTK(1)AMR	-0.068915	1.72254	1.41828	2.28075	0.38077	0.0965322	0.101135
map00630 Glyoxylate and dicarboxylate metabolism	0.170892	1.48	A0A287BA08	602	K	24.896	0.00144884	Up	Methylmalonyl-CoA isomerase OS=Sus scrofa OX=9823 GN=MMUT PE=3 SV=1	MMUT	K01847	1	0.019907	92.187	2	EISFAIK(1)R	-0.42791	1.01745	1.87138	2.87947	0.116433	0.0444906	0.0707696
map00630 Glyoxylate and dicarboxylate metabolism	0.170892	1.48	A0A287BA08	343	K	33.07	8.34099e-05	Up	Methylmalonyl-CoA isomerase OS=Sus scrofa OX=9823 GN=MMUT PE=3 SV=1	MMUT	K01847	1	0.000984314	172.14	2	NSK(1)SLLLR	-0.53771	1.47697	2.12065	2.22627	0.0790856	0.0440465	0.0529748
map00630 Glyoxylate and dicarboxylate metabolism	0.170892	1.48	A0A5G2QGS5	189	K	7.57	0.00461557	Up	Acetyl-CoA acetyltransferase 1 OS=Sus scrofa OX=9823 GN=ACAT1 PE=1 SV=1	ACAT1	K00626	1	1.45144e-17	199.61	3	DGLTDVYNK(1)IHMGNCAENTAK	-0.045735	2.1555	2.01764		0.377836	0.183822	0.265202
map00630 Glyoxylate and dicarboxylate metabolism	0.170892	1.48	A0A5G2QGS5	244	K	12.716	0.000615442	Up	Acetyl-CoA acetyltransferase 1 OS=Sus scrofa OX=9823 GN=ACAT1 PE=1 SV=1	ACAT1	K00626	1	9.35826e-08	212.59	2	GK(1)PDTVVKEDEEYKR	-0.14921	1.5701	1.94238	2.05008	0.221611	0.121732	0.0940989
map00630 Glyoxylate and dicarboxylate metabolism	0.170892	1.48	A0A5G2QGS5	250	K	11.974	0.0032655	Up	Acetyl-CoA acetyltransferase 1 OS=Sus scrofa OX=9823 GN=ACAT1 PE=1 SV=1	ACAT1	K00626	1	8.23212e-40	308.74	2	GKPDTVVK(1)EDEEYKR	0.19203	1.50355	1.55256	1.68019	0.181169		0.0825359
map00630 Glyoxylate and dicarboxylate metabolism	0.170892	1.48	A0A5G2QGS5	267	K	12.183	0.0100254	Up	Acetyl-CoA acetyltransferase 1 OS=Sus scrofa OX=9823 GN=ACAT1 PE=1 SV=1	ACAT1	K00626	1	0.00533267	173.11	2	LK(1)TVFQK	0.48107	1.52684	1.38348	1.83026	0.198907		0.0605114
map00630 Glyoxylate and dicarboxylate metabolism	0.170892	1.48	A0A5G2QGS5	123	K	2.893	0.00648098	Up	Acetyl-CoA acetyltransferase 1 OS=Sus scrofa OX=9823 GN=ACAT1 PE=1 SV=1	ACAT1	K00626	1	4.41462e-10	151.42	3	QAVLGAGLPISTPCTTINK(1)VCASGMK	1.4209	1.05519	1.54805	1.46041	0.464522		0.471823
map00630 Glyoxylate and dicarboxylate metabolism	0.170892	1.48	A0A5G2QGS5	222	K	11.922	0.00257753	Up	Acetyl-CoA acetyltransferase 1 OS=Sus scrofa OX=9823 GN=ACAT1 PE=1 SV=1	ACAT1	K00626	1	0.0158276	91.085	2	SK(1)AAWEAGK	-0.74953	2.24838	2.19285		0.26981	0.14756	0.141401
map00630 Glyoxylate and dicarboxylate metabolism	0.170892	1.48	A0A5G2QGS5	262	K	25.223	0.000792457	Up	Acetyl-CoA acetyltransferase 1 OS=Sus scrofa OX=9823 GN=ACAT1 PE=1 SV=1	ACAT1	K00626	1	0.00402759	132.57	2	VDFNK(1)VPK	0.10583	1.23796	1.78037	1.85292		0.0781217	0.050632
map00630 Glyoxylate and dicarboxylate metabolism	0.170892	1.48	A0A5G2QPK6	58	K	14.471	0.00105459	Up	Dihydrolipoyl dehydrogenase OS=Sus scrofa OX=9823 GN=DLD PE=1 SV=1	DLD	K00382	1	6.98919e-05	196.48	2	AAQLGFK(1)TVCIEK	0.0011054	1.63951	1.56697	2.40569	0.205739	0.0759641	0.106127
map00630 Glyoxylate and dicarboxylate metabolism	0.170892	1.48	A0A5G2QPK6	96	K	7.669	0.00101237	Up	Dihydrolipoyl dehydrogenase OS=Sus scrofa OX=9823 GN=DLD PE=1 SV=1	DLD	K00382	1	6.69026e-49	313.04	4	ALLNNSHYYHMAHGK(1)DFASR	0.81498	1.90275	1.34769	2.05746	0.18081	0.180116	0.331169
map00630 Glyoxylate and dicarboxylate metabolism	0.170892	1.48	A0A5G2QPK6	135	K	2.712	0.0179189	Up	Dihydrolipoyl dehydrogenase OS=Sus scrofa OX=9823 GN=DLD PE=1 SV=1	DLD	K00382	1	2.83008e-140	407.16	3	SNAVK(1)ALTGGIAHLFK(1)QNK	-0.511	1.39969	1.94509	1.03871	0.37931	0.71524	0.52196
map00630 Glyoxylate and dicarboxylate metabolism	0.170892	1.48	A0A5G2QPK6	409	K	4.416	0.00806848	Up	Dihydrolipoyl dehydrogenase OS=Sus scrofa OX=9823 GN=DLD PE=1 SV=1	DLD	K00382	1	9.81057e-41	315.21	2	EEGIEYK(1)VGK	0.0090722	1.65767	1.73328	1.50127	0.597975	0.312334	0.197473
map00630 Glyoxylate and dicarboxylate metabolism	0.170892	1.48	A0A5G2QPK6	269	K	10.152	0.000750656	Up	Dihydrolipoyl dehydrogenase OS=Sus scrofa OX=9823 GN=DLD PE=1 SV=1	DLD	K00382	1	0.00021351	178.55	2	LNTK(1)VIGATK	-0.50256	1.41263	1.84138	2.20799	0.246217	0.175624	0.11616
map00630 Glyoxylate and dicarboxylate metabolism	0.170892	1.48	A0A5G2QPK6	338	K	5.662	0.00569049	Up	Dihydrolipoyl dehydrogenase OS=Sus scrofa OX=9823 GN=DLD PE=1 SV=1	DLD	K00382	1	2.12613e-09	154.65	3	FQTK(1)IPNIYAIGDVVAGPMLAHK	-0.4543	1.04519	1.32725	2.7269	0.242605	0.311758	0.346298
map00630 Glyoxylate and dicarboxylate metabolism	0.170892	1.48	A0A5G2QPK6	259	K	4.306	0.00171738	Up	Dihydrolipoyl dehydrogenase OS=Sus scrofa OX=9823 GN=DLD PE=1 SV=1	DLD	K00382	1	0.000942284	135.83	2	ILQK(1)QGFK(1)FK	-0.29711	1.38859	1.8666	1.61407	0.515362	0.282005	0.333363
map00630 Glyoxylate and dicarboxylate metabolism	0.170892	1.48	A0A5G2QPK6	151	K	12.703	0.000528701	Up	Dihydrolipoyl dehydrogenase OS=Sus scrofa OX=9823 GN=DLD PE=1 SV=1	DLD	K00382	1	5.05413e-10	201.61	3	ITGK(1)NQVTATK(1)ADGSTEVINTK	0.16389	1.75435	1.80692	2.00089	0.222108	0.0946223	0.121115
map00630 Glyoxylate and dicarboxylate metabolism	0.170892	1.48	A0A5G2QPK6	158	K	21.78	0.00019812	Up	Dihydrolipoyl dehydrogenase OS=Sus scrofa OX=9823 GN=DLD PE=1 SV=1	DLD	K00382	1	9.13913e-100	377.19	2	NQVTATK(1)ADGSTEVINTK	-0.156	1.61789	2.19801	1.92072	0.121481	0.0855181	0.0563852
map00630 Glyoxylate and dicarboxylate metabolism	0.170892	1.48	A0A5G2QPK6	119	K	12.123	0.00472041	Up	Dihydrolipoyl dehydrogenase OS=Sus scrofa OX=9823 GN=DLD PE=1 SV=1	DLD	K00382	1	9.06167e-05	179.1	2	MMEQK(1)SNAVK	-0.32445	1.39617	0.839096	3.30751	0.181401	0.130613	0.145213
map00630 Glyoxylate and dicarboxylate metabolism	0.170892	1.48	A0A5G2QPK6	124	K	11.949	0.0040856	Up	Dihydrolipoyl dehydrogenase OS=Sus scrofa OX=9823 GN=DLD PE=1 SV=1	DLD	K00382	1	1.49524e-09	167.14	3	SNAVK(1)ALTGGIAHLFK(1)QNK	-0.511	2.07125	0.955968	1.70857	0.123067	0.141145
map00630 Glyoxylate and dicarboxylate metabolism	0.170892	1.48	A0A5G2QPK6	402	K	2.117	0.0256796	Up	Dihydrolipoyl dehydrogenase OS=Sus scrofa OX=9823 GN=DLD PE=1 SV=1	DLD	K00382	1	6.03025e-06	209.19	2	SEEQLK(1)EEGIEYK	0.28517	1.32037	1.83202	0.922558	0.625911	0.712405	0.586733
map00630 Glyoxylate and dicarboxylate metabolism	0.170892	1.48	P00346	185	K	4.208	0.0079468	Up	Malate dehydrogenase, mitochondrial OS=Sus scrofa OX=9823 GN=MDH2 PE=1 SV=2	MDH2	K00026	1	5.48131e-07	235.31	2	ANAFVAELK(1)GLDPAR	-1.0124	1.1204	1.7119	2.0157	0.419117	0.504961	0.227921
map00630 Glyoxylate and dicarboxylate metabolism	0.170892	1.48	P00346	329	K	2.438	0.0034956	Up	Malate dehydrogenase, mitochondrial OS=Sus scrofa OX=9823 GN=MDH2 PE=1 SV=2	MDH2	K00026	1	2.53614e-05	156.12	2	K(1)GEEFVK(1)NMK	-0.30892	1.3538	1.67353	1.22748	0.638771	0.647366	0.459058
map00630 Glyoxylate and dicarboxylate metabolism	0.170892	1.48	P00346	335	K	21.913	0.00181697	Up	Malate dehydrogenase, mitochondrial OS=Sus scrofa OX=9823 GN=MDH2 PE=1 SV=2	MDH2	K00026	1	8.16366e-28	294.13	2	K(1)GEEFVK(1)NMK	-0.30892	2.1044	1.80614	1.8276	0.170394	0.0405965	0.0508696
map00630 Glyoxylate and dicarboxylate metabolism	0.170892	1.48	P00346	78	K	2.603	0.0170854	Up	Malate dehydrogenase, mitochondrial OS=Sus scrofa OX=9823 GN=MDH2 PE=1 SV=2	MDH2	K00026	1	5.50756e-26	273.66	3	ATVK(1)GYLGPEQLPDCLK	-0.80394	1.63839	1.35052	1.34578	0.679153	0.666441	0.319713
map00630 Glyoxylate and dicarboxylate metabolism	0.170892	1.48	P00346	279	K	15.425	0.00635621	Up	Malate dehydrogenase, mitochondrial OS=Sus scrofa OX=9823 GN=MDH2 PE=1 SV=2	MDH2	K00026	1	3.3385e-13	159.66	3	EGVVECSFVK(1)SQETDCPYFSTPLLLGK	0.36992	1.30254	1.34379	2.14652	0.149394		0.0577535
map00630 Glyoxylate and dicarboxylate metabolism	0.170892	1.48	P00346	301	K	16.907	0.000280571	Up	Malate dehydrogenase, mitochondrial OS=Sus scrofa OX=9823 GN=MDH2 PE=1 SV=2	MDH2	K00026	1	0.000198873	203.02	2	K(1)GIEK(1)NLGIGK	0.40642	1.55129	1.88671	2.22695	0.158934	0.100258	0.0758711
map00630 Glyoxylate and dicarboxylate metabolism	0.170892	1.48	P00346	215	K	9.282	0.00463831	Up	Malate dehydrogenase, mitochondrial OS=Sus scrofa OX=9823 GN=MDH2 PE=1 SV=2	MDH2	K00026	1	4.23192e-111	382.37	3	TIIPLISQCTPK(1)VDFPQDQLSTLTGR	0.59884	1.61915	0.976929	2.06888		0.168183	0.166858
map00630 Glyoxylate and dicarboxylate metabolism	0.170892	1.48	P00346	45	K	21.045	0.00475866	Up	Malate dehydrogenase, mitochondrial OS=Sus scrofa OX=9823 GN=MDH2 PE=1 SV=2	MDH2	K00026	1	4.41979e-47	292.41	3	VAVLGASGGIGQPLSLLLK(1)NSPLVSR	0.52314	1.71682	0.763961	3.24705	0.143132	0.0813776	0.0476549
map00630 Glyoxylate and dicarboxylate metabolism	0.170892	1.48	P00346	203	K	3.403	0.00741222	Up	Malate dehydrogenase, mitochondrial OS=Sus scrofa OX=9823 GN=MDH2 PE=1 SV=2	MDH2	K00026	1	1.30613e-09	153.24	3	VSVPVIGGHAGK(1)TIIPLISQCTPK	-0.18212	1.33607	1.44826	1.39667	0.306724		0.512277
map00630 Glyoxylate and dicarboxylate metabolism	0.170892	1.48	P16276	689	K	19.968	0.000624163	Up	Aconitate hydratase, mitochondrial OS=Sus scrofa OX=9823 GN=ACO2 PE=1 SV=1	ACO2	K01681	1	0.000302057	174.27	2	AIITK(1)SFAR	-0.044618	1.49208	1.3721	2.84968	0.136424	0.0724017	0.0773186
map00630 Glyoxylate and dicarboxylate metabolism	0.170892	1.48	P16276	31	K	12.669	0.00115542	Up	Aconitate hydratase, mitochondrial OS=Sus scrofa OX=9823 GN=ACO2 PE=1 SV=1	ACO2	K01681	1	3.40818e-81	373.19	3	AK(1)VAMSHFEPHEYIR	-0.18918	1.73332	1.63365	2.19409	0.228138	0.130923	0.0798866
map00630 Glyoxylate and dicarboxylate metabolism	0.170892	1.48	P16276	743	K	17.957	0.000782183	Up	Aconitate hydratase, mitochondrial OS=Sus scrofa OX=9823 GN=ACO2 PE=1 SV=1	ACO2	K01681	1	8.52258e-119	382.03	4	CIIK(1)HPNGTQETILLNHTFNETQIEWFR	0.18246	1.55699	2.99231	1.13419	0.0996602	0.0880113	0.128835
map00630 Glyoxylate and dicarboxylate metabolism	0.170892	1.48	P16276	411	K	11.448	0.000927523	Up	Aconitate hydratase, mitochondrial OS=Sus scrofa OX=9823 GN=ACO2 PE=1 SV=1	ACO2	K01681	1	7.4393e-41	314.48	2	CK(1)SQFTITPGSEQIR	0.36111	1.25895	1.61425	2.64481	0.21658	0.14122	0.124199
map00630 Glyoxylate and dicarboxylate metabolism	0.170892	1.48	P16276	736	K	3.083	0.00559877	Up	Aconitate hydratase, mitochondrial OS=Sus scrofa OX=9823 GN=ACO2 PE=1 SV=1	ACO2	K01681	1	0.0318822	77.282	2	DFAPGK(1)PLK	0.086867	1.27174	1.74756	1.51128	0.639652	0.498386	0.331382
map00630 Glyoxylate and dicarboxylate metabolism	0.170892	1.48	P16276	517	K	3.549	0.0132183	Up	Aconitate hydratase, mitochondrial OS=Sus scrofa OX=9823 GN=ACO2 PE=1 SV=1	ACO2	K01681	1	6.62604e-06	186.24	2	FNPETDFLTGK(1)DGK(1)K	0.053389	1.46234	2.18983	1.02885	0.608275	0.406919	0.303786
map00630 Glyoxylate and dicarboxylate metabolism	0.170892	1.48	P16276	465	K	14.148	0.00297582	Up	Aconitate hydratase, mitochondrial OS=Sus scrofa OX=9823 GN=ACO2 PE=1 SV=1	ACO2	K01681	1	3.29132e-179	456.4	2	GEK(1)NTIVTSYNR	0.11002	1.5816	1.24132	2.78099	0.224873	0.0693008	0.101917
map00630 Glyoxylate and dicarboxylate metabolism	0.170892	1.48	P16276	591	K	4.261	2.81648e-06	Up	Aconitate hydratase, mitochondrial OS=Sus scrofa OX=9823 GN=ACO2 PE=1 SV=1	ACO2	K01681	1	2.14744e-11	229.9	3	GK(1)CTTDHISAAGPWLK	-0.83279	1.43645	1.47365	1.41349	0.338834		0.337578
map00630 Glyoxylate and dicarboxylate metabolism	0.170892	1.48	P16276	730	K	10.294	0.000273034	Up	Aconitate hydratase, mitochondrial OS=Sus scrofa OX=9823 GN=ACO2 PE=1 SV=1	ACO2	K01681	1	0.00167357	120.06	2	LTIQGLK(1)DFAPGK	-0.13652	2.04731	2.00427	1.41715	0.225924	0.132675	0.172665
map00630 Glyoxylate and dicarboxylate metabolism	0.170892	1.48	P16276	309	K	26.528	0.000192411	Up	Aconitate hydratase, mitochondrial OS=Sus scrofa OX=9823 GN=ACO2 PE=1 SV=1	ACO2	K01681	1	0.0158508	130.28	2	YLSK(1)TGR	0.31834	1.83217	1.69531	2.25456	0.106581	0.0643071	0.0470683
map00630 Glyoxylate and dicarboxylate metabolism	0.170892	1.48	P16276	573	K	12.775	0.0276893	Up	Aconitate hydratase, mitochondrial OS=Sus scrofa OX=9823 GN=ACO2 PE=1 SV=1	ACO2	K01681	1	3.58621e-09	169.58	2	LQLLEPFDK(1)WDGK	0.30085	1.17862	2.12908	1.44433	0.213796		0.0341821
map00630 Glyoxylate and dicarboxylate metabolism	0.170892	1.48	P16276	577	K	24.087	0.00482662	Up	Aconitate hydratase, mitochondrial OS=Sus scrofa OX=9823 GN=ACO2 PE=1 SV=1	ACO2	K01681	1	6.5465e-14	240.6	2	WDGK(1)DLEDLQILIK	0.42675	1.76202	2.27418	0.829138		0.0791286	0.0555321
map00630 Glyoxylate and dicarboxylate metabolism	0.170892	1.48	P16276	776	K	6.021	0.0026225	Up	Aconitate hydratase, mitochondrial OS=Sus scrofa OX=9823 GN=ACO2 PE=1 SV=1	ACO2	K01681	1	0.0162358	121.62	2	MK(1)ELQQK	-0.42385	1.81735	1.68668	1.64139	0.437479	0.167133	0.249968
map00630 Glyoxylate and dicarboxylate metabolism	0.170892	1.48	P16276	401	K	7.441	0.0270806	Up	Aconitate hydratase, mitochondrial OS=Sus scrofa OX=9823 GN=ACO2 PE=1 SV=1	ACO2	K01681	1	4.17135e-06	152.62	2	SAAVAK(1)QALAHGLK	-0.23276	2.39631	1.76483		0.41383	0.313212	0.111817
map00630 Glyoxylate and dicarboxylate metabolism	0.170892	1.48	P16276	138	K	2.442	0.0116481	Up	Aconitate hydratase, mitochondrial OS=Sus scrofa OX=9823 GN=ACO2 PE=1 SV=1	ACO2	K01681	1	2.8047e-13	174.19	3	VAVPSTIHCDHLIEAQLGGEK(1)DLR	0.45548	1.20147	1.46344	1.59185	0.821558	0.457865	0.463829
map00630 Glyoxylate and dicarboxylate metabolism	0.170892	1.48	P16276	50	K	12.102	4.26321e-05	Up	Aconitate hydratase, mitochondrial OS=Sus scrofa OX=9823 GN=ACO2 PE=1 SV=1	ACO2	K01681	1	3.29924e-06	218.07	2	YDLLEK(1)NIDIVR	0.14097	1.47189	1.78743	2.28273	0.153344	0.157477	0.147131
map00630 Glyoxylate and dicarboxylate metabolism	0.170892	1.48	P16276	549	K	5.59	0.0293716	Up	Aconitate hydratase, mitochondrial OS=Sus scrofa OX=9823 GN=ACO2 PE=1 SV=1	ACO2	K01681	1	1.60159e-48	304.03	3	AEFDPGQDTYQHPPK(1)DSSGQR	0.69224		2.46666	1.47553	0.598898	0.215406	0.243499
map00630 Glyoxylate and dicarboxylate metabolism	0.170892	1.48	F1SRC5	627	K	3.221	0.00638557	Up	Aconitate hydratase, mitochondrial OS=Sus scrofa OX=9823 GN=ACO2 PE=1 SV=3	ACO2	K01681	1	2.06239e-28	223.18	3	GHLDNISNNLLIGAINIENGK(1)ANSVR	-0.37308	1.42903	1.47318	1.67642	0.585671	0.548254	0.287443
map00640 Propanoate metabolism	0.00158134	1.95	A0A287BA45	76	K	5.313	5.65192e-05	Up	Succinate--CoA ligase [GDP-forming] subunit beta, mitochondrial OS=Sus scrofa OX=9823 GN=SUCLG2 PE=3 SV=1	SUCLG2	K01900	1	0.00626994	103.7	2	GK(1)GVFSSGLK	-2.2376	1.6977	1.6271	1.72476	0.36339	0.32192	0.265131
map00640 Propanoate metabolism	0.00158134	1.95	A0A287BA45	254	K	2.573	0.0024603	Up	Succinate--CoA ligase [GDP-forming] subunit beta, mitochondrial OS=Sus scrofa OX=9823 GN=SUCLG2 PE=3 SV=1	SUCLG2	K01900	1	2.61085e-08	172.98	2	QK(1)DIFAMDDK	0.20076	1.14501	1.82339	1.35228	0.570803	0.554345	0.554172
map00640 Propanoate metabolism	0.00158134	1.95	A0A5G2QFH7	687	K	5.067	0.00589336	Up	Dihydrolipoamide acetyltransferase component of pyruvate dehydrogenase complex OS=Sus scrofa OX=9823 GN=DBT PE=1 SV=1	DBT	K09699	1	0.000268764	101.64	4	GDVHK(1)AQIMNVSWSADHR	0.27852	1.71881	1.66683	1.62547	0.545719	0.261155	0.18202
map00640 Propanoate metabolism	0.00158134	1.95	A0A287BG49	306	K	4.488	0.000917961	Up	Short-chain-specific acyl-CoA dehydrogenase, mitochondrial OS=Sus scrofa OX=9823 GN=ACADS PE=1 SV=1	ACADS	K00248	1	1.05069e-06	184.9	2	AFGVPLTK(1)LQGIQFK	0.43514	1.23489	1.93169	1.74005	0.440723	0.314058	0.338591
map00640 Propanoate metabolism	0.00158134	1.95	A0A287BG49	262	K	4.285	0.00455088	Up	Short-chain-specific acyl-CoA dehydrogenase, mitochondrial OS=Sus scrofa OX=9823 GN=ACADS PE=1 SV=1	ACADS	K00248	1	3.87505e-06	127.05	3	ENLLGEPGMGFK(1)IAMQTLDMGR	-0.66191	1.29993	1.86584	1.161		0.325755	0.34748
map00640 Propanoate metabolism	0.00158134	1.95	A0A287BG49	389	K	21.088	0.000102548	Up	Short-chain-specific acyl-CoA dehydrogenase, mitochondrial OS=Sus scrofa OX=9823 GN=ACADS PE=1 SV=1	ACADS	K00248	1	2.78967e-06	218.47	3	LVIAGHLLK(1)SYRS	-0.41221	2.50745	1.61607	1.60484	0.0999544	0.0686739	0.103011
map00640 Propanoate metabolism	0.00158134	1.95	A0A287BG49	208	K	3.749	0.0205058	Up	Short-chain-specific acyl-CoA dehydrogenase, mitochondrial OS=Sus scrofa OX=9823 GN=ACADS PE=1 SV=1	ACADS	K00248	1	3.98706e-07	125.04	3	SLQNK(1)GISAFLVPMPTPGLTLGK	-0.1081	1.34448	1.75932	1.14127	0.501996	0.252937
map00640 Propanoate metabolism	0.00158134	1.95	A0A287AA21	139	K	20.278	0.000317685	Up	Enoyl-CoA hydratase, mitochondrial OS=Sus scrofa OX=9823 GN=ECHS1 PE=1 SV=2	ECHS1	K07511	1	2.67594e-146	404.47	4	AFAAGADIK(1)EMQNQTFQDCYSGGFLSHWDHLSR	0.4262	2.63466		2.02096	0.096066	0.133847	0.11447
map00640 Propanoate metabolism	0.00158134	1.95	A0A287AA21	320	K	6.846	0.0125963	Up	Enoyl-CoA hydratase, mitochondrial OS=Sus scrofa OX=9823 GN=ECHS1 PE=1 SV=2	ECHS1	K07511	1	0.00959304	88.364	2	EGMTAFVEK(1)R	0.70354	1.44063	1.29248	1.82318	0.319528	0.124176
map00640 Propanoate metabolism	0.00158134	1.95	A0A287AA21	81	K	34.123	0.00143034	Up	Enoyl-CoA hydratase, mitochondrial OS=Sus scrofa OX=9823 GN=ECHS1 PE=1 SV=2	ECHS1	K07511	1	5.79872e-96	376.25	2	GK(1)SSNVGLIQLNRPK	0.042881	1.85701	1.5273	2.44486	0.109275	0.0233578	0.0381957
map00640 Propanoate metabolism	0.00158134	1.95	A0A287AA21	94	K	3.783	0.0112545	Up	Enoyl-CoA hydratase, mitochondrial OS=Sus scrofa OX=9823 GN=ECHS1 PE=1 SV=2	ECHS1	K07511	1	0.000289903	179.21	2	PK(1)ALNALCK	-1.0226	1.47849	1.44979	1.81725	0.702539	0.28967	0.262259
map00640 Propanoate metabolism	0.00158134	1.95	F1RK10	157	K	8.372	0.0144662	Up	Succinate--CoA ligase [ADP-forming] subunit beta, mitochondrial OS=Sus scrofa OX=9823 GN=SUCLA2 PE=1 SV=3	SUCLA2	K01900	1	0.000252942	150.81	2	EPIDIVEGIK(1)K	-0.30176	1.08762	1.57797	1.96561	0.269359	0.0994472
map00640 Propanoate metabolism	0.00158134	1.95	F1RK10	50	K	9.942	0.000113281	Up	Succinate--CoA ligase [ADP-forming] subunit beta, mitochondrial OS=Sus scrofa OX=9823 GN=SUCLA2 PE=1 SV=3	SUCLA2	K01900	1	0.00101433	127.4	2	GK(1)GTFESGLK	0.097095	1.69445	1.62331	1.36805	0.154362		0.159834
map00640 Propanoate metabolism	0.00158134	1.95	F1RK10	35	K	9.408	0.0159815	Up	Succinate--CoA ligase [ADP-forming] subunit beta, mitochondrial OS=Sus scrofa OX=9823 GN=SUCLA2 PE=1 SV=3	SUCLA2	K01900	1	0.00363903	126.39	2	LGSK(1)DVVIK	0.28794	1.3637	1.50613	1.79932	0.259564		0.0712916
map00640 Propanoate metabolism	0.00158134	1.95	F1RK10	85	K	9.477	0.0109903	Up	Succinate--CoA ligase [ADP-forming] subunit beta, mitochondrial OS=Sus scrofa OX=9823 GN=SUCLA2 PE=1 SV=3	SUCLA2	K01900	1	0.00142966	132.76	2	LFTK(1)QTGEK	0.70056	1.3525	1.77333	1.54557	0.246634		0.0819707
map00640 Propanoate metabolism	0.00158134	1.95	A0A287B2H7	43	K	6.535	0.0122783	Up	L-lactate dehydrogenase OS=Sus scrofa OX=9823 GN=LDHA PE=3 SV=1	LDHA	K00016	1	2.50729e-11	191.95	3	DQLIHNLLK(1)EEHVPHNK	-0.46433	1.51358	1.54076	2.14935	0.530619	0.150079	0.115608
map00640 Propanoate metabolism	0.00158134	1.95	A0A287B2H7	27	K	9.41	0.000640596	Up	L-lactate dehydrogenase OS=Sus scrofa OX=9823 GN=LDHA PE=3 SV=1	LDHA	K00016	1	8.76591e-06	204	2	IPFGSK(1)STMATLK	0.09702	1.57728	1.35798	2.48837	0.244205	0.181847	0.150321
map00640 Propanoate metabolism	0.00158134	1.95	A0A287B2H7	88	K	8.849	0.00786298	Up	L-lactate dehydrogenase OS=Sus scrofa OX=9823 GN=LDHA PE=3 SV=1	LDHA	K00016	1	9.045e-09	201.3	3	LK(1)GEMMDLQHGSLFLR	-0.87575	1.08174	1.39151	2.17644	0.225115	0.125195
map00640 Propanoate metabolism	0.00158134	1.95	A0A287B2H7	253	K	4.195	0.0188506	Up	L-lactate dehydrogenase OS=Sus scrofa OX=9823 GN=LDHA PE=3 SV=1	LDHA	K00016	1	0.000666693	98.572	3	NLHPELGTDADK(1)EHWK	0.4551	1.43181	0.955315	2.45789	0.557872	0.36457	0.232546
map00640 Propanoate metabolism	0.00158134	1.95	A0A287B2H7	105	K	3.079	0.0390578	Up	L-lactate dehydrogenase OS=Sus scrofa OX=9823 GN=LDHA PE=3 SV=1	LDHA	K00016	1	0.0116506	110.79	2	TPK(1)IVSGK	-1.0115	1.08917	1.65129	1.36967	0.61528		0.274596
map00640 Propanoate metabolism	0.00158134	1.95	A0A287B2H7	346	K	4.975	0.00557657	Up	L-lactate dehydrogenase OS=Sus scrofa OX=9823 GN=LDHA PE=3 SV=1	LDHA	K00016	1	7.50937e-05	156.48	2	VTLTPEEEAHLK(1)K	-0.11169	1.82187		2.01984	0.517976	0.285752	0.354564
map00640 Propanoate metabolism	0.00158134	1.95	A0A287B574	69	K	13.454	0.000809585	Up	Succinate--CoA ligase [ADP/GDP-forming] subunit alpha, mitochondrial OS=Sus scrofa OX=9823 GN=SUCLG1 PE=3 SV=2	SUCLG1	K01899	1	1.5541e-51	318.7	2	GGK(1)THLGLPVFNTVK	-0.4171	2.52201	1.47741	1.58546	0.206454	0.0946707	0.113987
map00640 Propanoate metabolism	0.00158134	1.95	A0A287B574	30	K	6.626	0.00102062	Up	Succinate--CoA ligase [ADP/GDP-forming] subunit alpha, mitochondrial OS=Sus scrofa OX=9823 GN=SUCLG1 PE=3 SV=2	SUCLG1	K01899	1	0.000948802	138.4	2	HLYVDK(1)NTK	-2.4741	1.27191	1.864	2.07731	0.35322	0.224493	0.209062
map00640 Propanoate metabolism	0.00158134	1.95	A0A287B574	168	K	5.747	0.00102914	Up	Succinate--CoA ligase [ADP/GDP-forming] subunit alpha, mitochondrial OS=Sus scrofa OX=9823 GN=SUCLG1 PE=3 SV=2	SUCLG1	K01899	1	0.00068043	125.31	2	IGIMPGHIHK(1)K	-0.50267	1.50735	1.58892	1.384	0.303875	0.215854
map00640 Propanoate metabolism	0.00158134	1.95	A0A287B574	24	K	21.156	0.000678481	Up	Succinate--CoA ligase [ADP/GDP-forming] subunit alpha, mitochondrial OS=Sus scrofa OX=9823 GN=SUCLG1 PE=3 SV=2	SUCLG1	K01899	1	0.0109422	131.03	2	K(1)HLYVDK	-2.3891	1.51417	1.92575	2.28927	0.150025	0.0646773	0.0561104
map00640 Propanoate metabolism	0.00158134	1.95	A0A287B9G2	328	K	12.504	0.00205742	Up	3-hydroxyisobutyryl-CoA hydrolase, mitochondrial OS=Sus scrofa OX=9823 GN=HIBCH PE=1 SV=2	HIBCH	K05605	1	0.00375626	107.57	2	AVLIDK(1)DQNPK	-0.47927	1.47583	2.13269	1.1384		0.139291	0.113795
map00640 Propanoate metabolism	0.00158134	1.95	A0A287BA08	602	K	24.896	0.00144884	Up	Methylmalonyl-CoA isomerase OS=Sus scrofa OX=9823 GN=MMUT PE=3 SV=1	MMUT	K01847	1	0.019907	92.187	2	EISFAIK(1)R	-0.42791	1.01745	1.87138	2.87947	0.116433	0.0444906	0.0707696
map00640 Propanoate metabolism	0.00158134	1.95	A0A287BA08	343	K	33.07	8.34099e-05	Up	Methylmalonyl-CoA isomerase OS=Sus scrofa OX=9823 GN=MMUT PE=3 SV=1	MMUT	K01847	1	0.000984314	172.14	2	NSK(1)SLLLR	-0.53771	1.47697	2.12065	2.22627	0.0790856	0.0440465	0.0529748
map00640 Propanoate metabolism	0.00158134	1.95	A0A5G2QGS5	189	K	7.57	0.00461557	Up	Acetyl-CoA acetyltransferase 1 OS=Sus scrofa OX=9823 GN=ACAT1 PE=1 SV=1	ACAT1	K00626	1	1.45144e-17	199.61	3	DGLTDVYNK(1)IHMGNCAENTAK	-0.045735	2.1555	2.01764		0.377836	0.183822	0.265202
map00640 Propanoate metabolism	0.00158134	1.95	A0A5G2QGS5	244	K	12.716	0.000615442	Up	Acetyl-CoA acetyltransferase 1 OS=Sus scrofa OX=9823 GN=ACAT1 PE=1 SV=1	ACAT1	K00626	1	9.35826e-08	212.59	2	GK(1)PDTVVKEDEEYKR	-0.14921	1.5701	1.94238	2.05008	0.221611	0.121732	0.0940989
map00640 Propanoate metabolism	0.00158134	1.95	A0A5G2QGS5	250	K	11.974	0.0032655	Up	Acetyl-CoA acetyltransferase 1 OS=Sus scrofa OX=9823 GN=ACAT1 PE=1 SV=1	ACAT1	K00626	1	8.23212e-40	308.74	2	GKPDTVVK(1)EDEEYKR	0.19203	1.50355	1.55256	1.68019	0.181169		0.0825359
map00640 Propanoate metabolism	0.00158134	1.95	A0A5G2QGS5	267	K	12.183	0.0100254	Up	Acetyl-CoA acetyltransferase 1 OS=Sus scrofa OX=9823 GN=ACAT1 PE=1 SV=1	ACAT1	K00626	1	0.00533267	173.11	2	LK(1)TVFQK	0.48107	1.52684	1.38348	1.83026	0.198907		0.0605114
map00640 Propanoate metabolism	0.00158134	1.95	A0A5G2QGS5	123	K	2.893	0.00648098	Up	Acetyl-CoA acetyltransferase 1 OS=Sus scrofa OX=9823 GN=ACAT1 PE=1 SV=1	ACAT1	K00626	1	4.41462e-10	151.42	3	QAVLGAGLPISTPCTTINK(1)VCASGMK	1.4209	1.05519	1.54805	1.46041	0.464522		0.471823
map00640 Propanoate metabolism	0.00158134	1.95	A0A5G2QGS5	222	K	11.922	0.00257753	Up	Acetyl-CoA acetyltransferase 1 OS=Sus scrofa OX=9823 GN=ACAT1 PE=1 SV=1	ACAT1	K00626	1	0.0158276	91.085	2	SK(1)AAWEAGK	-0.74953	2.24838	2.19285		0.26981	0.14756	0.141401
map00640 Propanoate metabolism	0.00158134	1.95	A0A5G2QGS5	262	K	25.223	0.000792457	Up	Acetyl-CoA acetyltransferase 1 OS=Sus scrofa OX=9823 GN=ACAT1 PE=1 SV=1	ACAT1	K00626	1	0.00402759	132.57	2	VDFNK(1)VPK	0.10583	1.23796	1.78037	1.85292		0.0781217	0.050632
map00640 Propanoate metabolism	0.00158134	1.95	A0A5G2QPK6	58	K	14.471	0.00105459	Up	Dihydrolipoyl dehydrogenase OS=Sus scrofa OX=9823 GN=DLD PE=1 SV=1	DLD	K00382	1	6.98919e-05	196.48	2	AAQLGFK(1)TVCIEK	0.0011054	1.63951	1.56697	2.40569	0.205739	0.0759641	0.106127
map00640 Propanoate metabolism	0.00158134	1.95	A0A5G2QPK6	96	K	7.669	0.00101237	Up	Dihydrolipoyl dehydrogenase OS=Sus scrofa OX=9823 GN=DLD PE=1 SV=1	DLD	K00382	1	6.69026e-49	313.04	4	ALLNNSHYYHMAHGK(1)DFASR	0.81498	1.90275	1.34769	2.05746	0.18081	0.180116	0.331169
map00640 Propanoate metabolism	0.00158134	1.95	A0A5G2QPK6	135	K	2.712	0.0179189	Up	Dihydrolipoyl dehydrogenase OS=Sus scrofa OX=9823 GN=DLD PE=1 SV=1	DLD	K00382	1	2.83008e-140	407.16	3	SNAVK(1)ALTGGIAHLFK(1)QNK	-0.511	1.39969	1.94509	1.03871	0.37931	0.71524	0.52196
map00640 Propanoate metabolism	0.00158134	1.95	A0A5G2QPK6	409	K	4.416	0.00806848	Up	Dihydrolipoyl dehydrogenase OS=Sus scrofa OX=9823 GN=DLD PE=1 SV=1	DLD	K00382	1	9.81057e-41	315.21	2	EEGIEYK(1)VGK	0.0090722	1.65767	1.73328	1.50127	0.597975	0.312334	0.197473
map00640 Propanoate metabolism	0.00158134	1.95	A0A5G2QPK6	269	K	10.152	0.000750656	Up	Dihydrolipoyl dehydrogenase OS=Sus scrofa OX=9823 GN=DLD PE=1 SV=1	DLD	K00382	1	0.00021351	178.55	2	LNTK(1)VIGATK	-0.50256	1.41263	1.84138	2.20799	0.246217	0.175624	0.11616
map00640 Propanoate metabolism	0.00158134	1.95	A0A5G2QPK6	338	K	5.662	0.00569049	Up	Dihydrolipoyl dehydrogenase OS=Sus scrofa OX=9823 GN=DLD PE=1 SV=1	DLD	K00382	1	2.12613e-09	154.65	3	FQTK(1)IPNIYAIGDVVAGPMLAHK	-0.4543	1.04519	1.32725	2.7269	0.242605	0.311758	0.346298
map00640 Propanoate metabolism	0.00158134	1.95	A0A5G2QPK6	259	K	4.306	0.00171738	Up	Dihydrolipoyl dehydrogenase OS=Sus scrofa OX=9823 GN=DLD PE=1 SV=1	DLD	K00382	1	0.000942284	135.83	2	ILQK(1)QGFK(1)FK	-0.29711	1.38859	1.8666	1.61407	0.515362	0.282005	0.333363
map00640 Propanoate metabolism	0.00158134	1.95	A0A5G2QPK6	151	K	12.703	0.000528701	Up	Dihydrolipoyl dehydrogenase OS=Sus scrofa OX=9823 GN=DLD PE=1 SV=1	DLD	K00382	1	5.05413e-10	201.61	3	ITGK(1)NQVTATK(1)ADGSTEVINTK	0.16389	1.75435	1.80692	2.00089	0.222108	0.0946223	0.121115
map00640 Propanoate metabolism	0.00158134	1.95	A0A5G2QPK6	158	K	21.78	0.00019812	Up	Dihydrolipoyl dehydrogenase OS=Sus scrofa OX=9823 GN=DLD PE=1 SV=1	DLD	K00382	1	9.13913e-100	377.19	2	NQVTATK(1)ADGSTEVINTK	-0.156	1.61789	2.19801	1.92072	0.121481	0.0855181	0.0563852
map00640 Propanoate metabolism	0.00158134	1.95	A0A5G2QPK6	119	K	12.123	0.00472041	Up	Dihydrolipoyl dehydrogenase OS=Sus scrofa OX=9823 GN=DLD PE=1 SV=1	DLD	K00382	1	9.06167e-05	179.1	2	MMEQK(1)SNAVK	-0.32445	1.39617	0.839096	3.30751	0.181401	0.130613	0.145213
map00640 Propanoate metabolism	0.00158134	1.95	A0A5G2QPK6	124	K	11.949	0.0040856	Up	Dihydrolipoyl dehydrogenase OS=Sus scrofa OX=9823 GN=DLD PE=1 SV=1	DLD	K00382	1	1.49524e-09	167.14	3	SNAVK(1)ALTGGIAHLFK(1)QNK	-0.511	2.07125	0.955968	1.70857	0.123067	0.141145
map00640 Propanoate metabolism	0.00158134	1.95	A0A5G2QPK6	402	K	2.117	0.0256796	Up	Dihydrolipoyl dehydrogenase OS=Sus scrofa OX=9823 GN=DLD PE=1 SV=1	DLD	K00382	1	6.03025e-06	209.19	2	SEEQLK(1)EEGIEYK	0.28517	1.32037	1.83202	0.922558	0.625911	0.712405	0.586733
map00640 Propanoate metabolism	0.00158134	1.95	A0A5G2RA17	28	K	4.318	0.0102673	Up	Aldehyde dehydrogenase 6 family member A1 OS=Sus scrofa OX=9823 GN=ALDH6A1 PE=1 SV=1	ALDH6A1	K00140	1	0.0118219	86.18	2	LFIGGK(1)FIESK	-1.3209	1.76493	1.61096	0.955402	0.33137	0.337342
map00640 Propanoate metabolism	0.00158134	1.95	A0A5G2RA17	57	K	21.395	0.000334485	Up	Aldehyde dehydrogenase 6 family member A1 OS=Sus scrofa OX=9823 GN=ALDH6A1 PE=1 SV=1	ALDH6A1	K00140	1	5.32736e-44	313.31	3	VPQATK(1)AEMDAAVSSCK	-0.45464	2.19362	1.567	1.97148	0.137999	0.0690887	0.060825
map00640 Propanoate metabolism	0.00158134	1.95	D2D0E6	151	K	8.729	0.00142869	Up	Malonyl-CoA decarboxylase OS=Sus scrofa OX=9823 GN=MLYCD PE=4 SV=1	MLYCD	K01578	1	0.0136598	61.657	3	SLFHHISK(1)LDGGVR	-2.578	1.93742	1.65143			0.209281	0.201865
map00640 Propanoate metabolism	0.00158134	1.95	F1SFX0	228	K	7.402	0.0103166	Up	L-lactate dehydrogenase OS=Sus scrofa OX=9823 GN=LDHC PE=2 SV=2	LDHC	K00016	1	3.09141e-114	393.33	2	DQWK(1)NIHK	-0.90744	1.1003	1.10626	2.38033	0.220709	0.192398
map00640 Propanoate metabolism	0.00158134	1.95	F1SFX0	81	K	3.789	0.00124263	Up	L-lactate dehydrogenase OS=Sus scrofa OX=9823 GN=LDHC PE=2 SV=2	LDHC	K00016	1	3.39125e-06	202.27	2	IVSGK(1)DYSVSANSK	-0.80078	1.16144	1.68393	1.90164	0.469981	0.405258	0.377748
map00640 Propanoate metabolism	0.00158134	1.95	F1SFX0	224	K	7.918	0.00282901	Up	L-lactate dehydrogenase OS=Sus scrofa OX=9823 GN=LDHC PE=2 SV=2	LDHC	K00016	1	5.23224e-06	218.58	2	LGTDSDK(1)DQWK	0.052794	1.91094	1.2493	2.16694	0.356349	0.141774	0.174711
map00640 Propanoate metabolism	0.00158134	1.95	F1SFX0	217	K	9.568	0.00607823	Up	L-lactate dehydrogenase OS=Sus scrofa OX=9823 GN=LDHC PE=2 SV=2	LDHC	K00016	1	1.48714e-15	251.84	2	TLDPK(1)LGTDSDKDQWK	0.3983	2.12055	2.20182		0.348453	0.181568	0.147612
map00640 Propanoate metabolism	0.00158134	1.95	F1SFX0	278	K	2.695	0.0275503	Up	L-lactate dehydrogenase OS=Sus scrofa OX=9823 GN=LDHC PE=2 SV=2	LDHC	K00016	1	1.22758e-06	178.1	3	VHPVSTMVK(1)GLYGIK	-0.54755	1.1205	1.22741	2.02824	0.774817	0.504547	0.344485
map00640 Propanoate metabolism	0.00158134	1.95	Q29554	262	K	7.157	0.000148423	Up	Trifunctional enzyme subunit alpha, mitochondrial OS=Sus scrofa OX=9823 GN=HADHA PE=2 SV=1	HADHA	K07515	1	0.0230026	111.39	2	DK(1)GLVEK	1.9227	1.50796	2.12247	1.63404	0.279951	0.203239	0.252339
map00640 Propanoate metabolism	0.00158134	1.95	Q29554	337	K	5.135	0.00990179	Up	Trifunctional enzyme subunit alpha, mitochondrial OS=Sus scrofa OX=9823 GN=HADHA PE=2 SV=1	HADHA	K07515	1	0.000273283	140.14	2	ESK(1)ALMGLYR	0.70982	1.50834	1.78929	1.72442	0.593777	0.169854	0.214311
map00640 Propanoate metabolism	0.00158134	1.95	Q29554	362	K	12.399	0.00224888	Up	Trifunctional enzyme subunit alpha, mitochondrial OS=Sus scrofa OX=9823 GN=HADHA PE=2 SV=1	HADHA	K07515	1	9.1233e-14	179.64	3	EVK(1)HLAILGAGLMGAGIAQVSVDK	-0.67277	1.6314	1.74674	2.17407	0.222383	0.160488	0.064918
map00640 Propanoate metabolism	0.00158134	1.95	Q29554	383	K	19.394	9.94043e-06	Up	Trifunctional enzyme subunit alpha, mitochondrial OS=Sus scrofa OX=9823 GN=HADHA PE=2 SV=1	HADHA	K07515	1	3.28254e-38	274.47	4	HLAILGAGLMGAGIAQVSVDK(1)HLK	-0.1212	2.12967	1.89821	1.67791	0.090733	0.114597	0.0888792
map00640 Propanoate metabolism	0.00158134	1.95	Q29554	644	K	15.327	0.0011441	Up	Trifunctional enzyme subunit alpha, mitochondrial OS=Sus scrofa OX=9823 GN=HADHA PE=2 SV=1	HADHA	K07515	1	8.86086e-20	266.58	2	GFYVYQEGVK(1)NR	0.60213	1.48671	2.30343	1.84236	0.198756	0.100973	0.067768
map00640 Propanoate metabolism	0.00158134	1.95	Q29554	411	K	11.934	0.000413425	Up	Trifunctional enzyme subunit alpha, mitochondrial OS=Sus scrofa OX=9823 GN=HADHA PE=2 SV=1	HADHA	K07515	1	1.50313e-28	286.45	3	GQQQVFK(1)GLNDK(1)VR	1.615	1.57651	2.0978	1.86178	0.219664	0.140402	0.103844
map00640 Propanoate metabolism	0.00158134	1.95	Q29554	309	K	9.663	0.00122596	Up	Trifunctional enzyme subunit alpha, mitochondrial OS=Sus scrofa OX=9823 GN=HADHA PE=2 SV=1	HADHA	K07515	1	5.4447e-28	256.9	3	IIDVVK(1)TGIEQGSDAGYLSESQK	-0.48788	1.59465	1.25306	2.5896	0.237413	0.19424	0.131039
map00640 Propanoate metabolism	0.00158134	1.95	Q29554	406	K	5.333	0.000909967	Up	Trifunctional enzyme subunit alpha, mitochondrial OS=Sus scrofa OX=9823 GN=HADHA PE=2 SV=1	HADHA	K07515	1	1.50313e-28	286.45	3	GQQQVFK(1)GLNDK(1)VR	1.615	1.48731	1.95748	1.60773	0.404543	0.222485	0.320456
map00640 Propanoate metabolism	0.00158134	1.95	Q29554	350	K	14.935	0.00147652	Up	Trifunctional enzyme subunit alpha, mitochondrial OS=Sus scrofa OX=9823 GN=HADHA PE=2 SV=1	HADHA	K07515	1	0.00182356	143.91	2	GQTLCK(1)K(1)NK	-0.2853	1.30268	1.99373	2.32706	0.21086	0.0863472	0.0793269
map00640 Propanoate metabolism	0.00158134	1.95	Q29554	351	K	14.935	0.00147652	Up	Trifunctional enzyme subunit alpha, mitochondrial OS=Sus scrofa OX=9823 GN=HADHA PE=2 SV=1	HADHA	K07515	1	0.00182356	143.91	2	GQTLCK(1)K(1)NK	-0.2853	1.30268	1.99373	2.32706	0.21086	0.0863472	0.0793269
map00640 Propanoate metabolism	0.00158134	1.95	Q29554	386	K	12.376	0.0015873	Up	Trifunctional enzyme subunit alpha, mitochondrial OS=Sus scrofa OX=9823 GN=HADHA PE=2 SV=1	HADHA	K07515	1	0.0143054	129.47	2	HLK(1)TILK	-0.23222	1.92691	1.70284	1.92167	0.239517	0.0732694	0.135795
map00640 Propanoate metabolism	0.00158134	1.95	Q29554	569	K	6.484	0.000221604	Up	Trifunctional enzyme subunit alpha, mitochondrial OS=Sus scrofa OX=9823 GN=HADHA PE=2 SV=1	HADHA	K07515	1	6.69682e-05	145.17	2	ILQEGVGPK(1)K	-0.45387	1.48643	2.22279	1.4891	0.264961	0.295403	0.241316
map00640 Propanoate metabolism	0.00158134	1.95	Q29554	415	K	5.846	0.000430241	Up	Trifunctional enzyme subunit alpha, mitochondrial OS=Sus scrofa OX=9823 GN=HADHA PE=2 SV=1	HADHA	K07515	1	0.0156839	109.71	2	K(1)K(1)ALTSFER	0.00556	1.54473	1.83478	1.74407	0.387967	0.259421	0.22904
map00640 Propanoate metabolism	0.00158134	1.95	Q29554	414	K	6.775	0.000281527	Up	Trifunctional enzyme subunit alpha, mitochondrial OS=Sus scrofa OX=9823 GN=HADHA PE=2 SV=1	HADHA	K07515	1	0.0196487	109.71	2	K(1)K(1)ALTSFER	0.00556	1.58979	1.87795	1.76058	0.3357	0.237865	0.198115
map00640 Propanoate metabolism	0.00158134	1.95	Q29554	597	K	49.862	0.000225682	Up	Trifunctional enzyme subunit alpha, mitochondrial OS=Sus scrofa OX=9823 GN=HADHA PE=2 SV=1	HADHA	K07515	1	1.99798e-98	345.79	4	LDSLTTSFGFPVGAATLMDEVGMDVAK(1)HVAENLGK	0.19193	1.33536	2.20761	2.33906	0.0270586	0.0610966	0.0298099
map00640 Propanoate metabolism	0.00158134	1.95	Q29554	214	K	8.368	0.0165153	Up	Trifunctional enzyme subunit alpha, mitochondrial OS=Sus scrofa OX=9823 GN=HADHA PE=2 SV=1	HADHA	K07515	1	0.000150662	100.08	3	K(1)MGLVDQLVEPLGPGLKPPEER	-0.76534	1.29578	2.1035	1.23176		0.275297	0.0936636
map00640 Propanoate metabolism	0.00158134	1.95	Q29554	292	K	7.381	9.84506e-05	Up	Trifunctional enzyme subunit alpha, mitochondrial OS=Sus scrofa OX=9823 GN=HADHA PE=2 SV=1	HADHA	K07515	1	1.84032e-12	234.92	2	K(1)QTK(1)GLYPAPLK	-0.034596	1.4069	1.90507	1.97215	0.272319	0.225776	0.217793
map00640 Propanoate metabolism	0.00158134	1.95	Q29554	295	K	7.591	0.00013527	Up	Trifunctional enzyme subunit alpha, mitochondrial OS=Sus scrofa OX=9823 GN=HADHA PE=2 SV=1	HADHA	K07515	1	1.84032e-12	234.92	2	QTK(1)GLYPAPLK(1)IIDVVK	0.38096	1.32944	2.05122	1.92096	0.245202	0.217096	0.236093
map00640 Propanoate metabolism	0.00158134	1.95	Q29554	634	K	6.425	0.011437	Up	Trifunctional enzyme subunit alpha, mitochondrial OS=Sus scrofa OX=9823 GN=HADHA PE=2 SV=1	HADHA	K07515	1	5.26918e-05	156.01	2	SGK(1)GFYVYQEGVK	0.6105	1.04396	1.88455	2.26345	0.490762	0.16206	0.155214
map00640 Propanoate metabolism	0.00158134	1.95	Q29554	285	K	23.805	0.00153919	Up	Trifunctional enzyme subunit alpha, mitochondrial OS=Sus scrofa OX=9823 GN=HADHA PE=2 SV=1	HADHA	K07515	1	0.00173611	188.81	2	K(1)VEEK(1)VR	-1.2912	1.59953	1.42516	1.83909	0.0920056	0.044207
map00640 Propanoate metabolism	0.00158134	1.95	Q29554	289	K	23.805	0.00153919	Up	Trifunctional enzyme subunit alpha, mitochondrial OS=Sus scrofa OX=9823 GN=HADHA PE=2 SV=1	HADHA	K07515	1	0.00173611	188.81	2	K(1)VEEK(1)VR	-1.2912	1.59953	1.42516	1.83909	0.0920056	0.044207
map00640 Propanoate metabolism	0.00158134	1.95	Q29554	735	K	3.491	0.0118892	Up	Trifunctional enzyme subunit alpha, mitochondrial OS=Sus scrofa OX=9823 GN=HADHA PE=2 SV=1	HADHA	K07515	1	0.0119138	104.06	2	K(1)YEAIYGK	0.26186	1.23405	2.03733	1.39269	0.638898	0.430363	0.266668
map00640 Propanoate metabolism	0.00158134	1.95	Q29554	742	K	7.604	0.0174953	Up	Trifunctional enzyme subunit alpha, mitochondrial OS=Sus scrofa OX=9823 GN=HADHA PE=2 SV=1	HADHA	K07515	1	3.33074e-56	310.9	3	YEAIYGK(1)QFTPCQLLIDHASSPNK	-0.40933	2.1914	0.973562	2.13768	0.472701	0.137778	0.0868798
map00640 Propanoate metabolism	0.00158134	1.95	Q29554	534	K	4.968	0.000506262	Up	Trifunctional enzyme subunit alpha, mitochondrial OS=Sus scrofa OX=9823 GN=HADHA PE=2 SV=1	HADHA	K07515	1	0.00874134	105.14	2	QGK(1)VIIVVK	0.043046	1.36823	1.52781	2.09859	0.391651	0.323143	0.290575
map00640 Propanoate metabolism	0.00158134	1.95	Q29554	540	K	14.449	0.000158613	Up	Trifunctional enzyme subunit alpha, mitochondrial OS=Sus scrofa OX=9823 GN=HADHA PE=2 SV=1	HADHA	K07515	1	7.99001e-16	250.94	2	VIIVVK(1)DGPGFYTTR	-0.12074	1.60044	2.05039	1.96079	0.178844	0.100987	0.108549
map00640 Propanoate metabolism	0.00158134	1.95	Q29554	625	K	7.608	0.00111284	Up	Trifunctional enzyme subunit alpha, mitochondrial OS=Sus scrofa OX=9823 GN=HADHA PE=2 SV=1	HADHA	K07515	1	0.0025854	118.5	2	QMISK(1)GFLGR	-0.27704	1.1603	1.70591	2.43674	0.275322	0.229837	0.191894
map00640 Propanoate metabolism	0.00158134	1.95	Q29554	505	K	6.295	0.000205172	Up	Trifunctional enzyme subunit alpha, mitochondrial OS=Sus scrofa OX=9823 GN=HADHA PE=2 SV=1	HADHA	K07515	1	1.51822e-08	153.88	3	VIGMHYFSPVDK(1)MQLLEIITTEK(1)TSK	-0.39814	1.33542	1.74453	2.09761	0.265787	0.302348	0.254302
map00640 Propanoate metabolism	0.00158134	1.95	Q29554	46	K	8.052	0.000393129	Up	Trifunctional enzyme subunit alpha, mitochondrial OS=Sus scrofa OX=9823 GN=HADHA PE=2 SV=1	HADHA	K07515	1	3.54276e-40	307.15	3	THINYGVK(1)GDVAVIR	-0.22291	1.61211	1.97531	1.74975	0.298486	0.205942	0.158402
map00640 Propanoate metabolism	0.00158134	1.95	Q29554	249	K	26.732	0.000913743	Up	Trifunctional enzyme subunit alpha, mitochondrial OS=Sus scrofa OX=9823 GN=HADHA PE=2 SV=1	HADHA	K07515	1	1.15063e-11	195.1	2	TIEYLEEVAVTFAK(1)GLADK	0.45096	1.91777	1.70262	1.25795	0.0458436		0.0758183
map00650 Butanoate metabolism	0.00273116	2.31	A0A287A9Z2	104	K	16.739	0.000533882	Up	L-2-hydroxyglutarate dehydrogenase OS=Sus scrofa OX=9823 GN=L2HGDH PE=1 SV=1	L2HGDH	K00109	1	2.50971e-67	320.8	4	DLAIHQTGHNSGVIHSGIYYK(1)PESLK	0.66103	1.10728	1.88373	2.67075	0.133997	0.097687	0.106546
map00650 Butanoate metabolism	0.00273116	2.31	A0A287A9Z2	173	K	17.25	0.00134609	Up	L-2-hydroxyglutarate dehydrogenase OS=Sus scrofa OX=9823 GN=L2HGDH PE=1 SV=1	L2HGDH	K00109	1	0.000301467	152.47	2	LIQQEDIK(1)K	-0.70815	1.28527	1.45813	2.07055		0.112669	0.0733745
map00650 Butanoate metabolism	0.00273116	2.31	A0A287BG49	306	K	4.488	0.000917961	Up	Short-chain-specific acyl-CoA dehydrogenase, mitochondrial OS=Sus scrofa OX=9823 GN=ACADS PE=1 SV=1	ACADS	K00248	1	1.05069e-06	184.9	2	AFGVPLTK(1)LQGIQFK	0.43514	1.23489	1.93169	1.74005	0.440723	0.314058	0.338591
map00650 Butanoate metabolism	0.00273116	2.31	A0A287BG49	262	K	4.285	0.00455088	Up	Short-chain-specific acyl-CoA dehydrogenase, mitochondrial OS=Sus scrofa OX=9823 GN=ACADS PE=1 SV=1	ACADS	K00248	1	3.87505e-06	127.05	3	ENLLGEPGMGFK(1)IAMQTLDMGR	-0.66191	1.29993	1.86584	1.161		0.325755	0.34748
map00650 Butanoate metabolism	0.00273116	2.31	A0A287BG49	389	K	21.088	0.000102548	Up	Short-chain-specific acyl-CoA dehydrogenase, mitochondrial OS=Sus scrofa OX=9823 GN=ACADS PE=1 SV=1	ACADS	K00248	1	2.78967e-06	218.47	3	LVIAGHLLK(1)SYRS	-0.41221	2.50745	1.61607	1.60484	0.0999544	0.0686739	0.103011
map00650 Butanoate metabolism	0.00273116	2.31	A0A287BG49	208	K	3.749	0.0205058	Up	Short-chain-specific acyl-CoA dehydrogenase, mitochondrial OS=Sus scrofa OX=9823 GN=ACADS PE=1 SV=1	ACADS	K00248	1	3.98706e-07	125.04	3	SLQNK(1)GISAFLVPMPTPGLTLGK	-0.1081	1.34448	1.75932	1.14127	0.501996	0.252937
map00650 Butanoate metabolism	0.00273116	2.31	A0A287AA21	139	K	20.278	0.000317685	Up	Enoyl-CoA hydratase, mitochondrial OS=Sus scrofa OX=9823 GN=ECHS1 PE=1 SV=2	ECHS1	K07511	1	2.67594e-146	404.47	4	AFAAGADIK(1)EMQNQTFQDCYSGGFLSHWDHLSR	0.4262	2.63466		2.02096	0.096066	0.133847	0.11447
map00650 Butanoate metabolism	0.00273116	2.31	A0A287AA21	320	K	6.846	0.0125963	Up	Enoyl-CoA hydratase, mitochondrial OS=Sus scrofa OX=9823 GN=ECHS1 PE=1 SV=2	ECHS1	K07511	1	0.00959304	88.364	2	EGMTAFVEK(1)R	0.70354	1.44063	1.29248	1.82318	0.319528	0.124176
map00650 Butanoate metabolism	0.00273116	2.31	A0A287AA21	81	K	34.123	0.00143034	Up	Enoyl-CoA hydratase, mitochondrial OS=Sus scrofa OX=9823 GN=ECHS1 PE=1 SV=2	ECHS1	K07511	1	5.79872e-96	376.25	2	GK(1)SSNVGLIQLNRPK	0.042881	1.85701	1.5273	2.44486	0.109275	0.0233578	0.0381957
map00650 Butanoate metabolism	0.00273116	2.31	A0A287AA21	94	K	3.783	0.0112545	Up	Enoyl-CoA hydratase, mitochondrial OS=Sus scrofa OX=9823 GN=ECHS1 PE=1 SV=2	ECHS1	K07511	1	0.000289903	179.21	2	PK(1)ALNALCK	-1.0226	1.47849	1.44979	1.81725	0.702539	0.28967	0.262259
map00650 Butanoate metabolism	0.00273116	2.31	A0A287ANI6	48	K	6.106	0.00207926	Up	Hydroxymethylglutaryl-CoA lyase OS=Sus scrofa OX=9823 GN=HMGCL PE=1 SV=2	HMGCL	K01640	1	2.62413e-22	271.32	3	DGLQNEK(1)NIIPTPTK	-0.073686	2.60163	1.39746	1.15652	0.281633	0.293286	0.26947
map00650 Butanoate metabolism	0.00273116	2.31	A0A5G2QIN8	319	K	4.487	0.0246806	Up	Aldehyde dehydrogenase 5 family member A1 OS=Sus scrofa OX=9823 GN=ALDH5A1 PE=1 SV=1	ALDH5A1	K00139	1	0.000868422	136.27	3	GIHDSFVK(1)K	-0.54088	2.18467	1.08874	1.63303	0.168477	0.68968	0.235411
map00650 Butanoate metabolism	0.00273116	2.31	A0A5G2QIN8	355	K	10.103	0.000216434	Up	Aldehyde dehydrogenase 5 family member A1 OS=Sus scrofa OX=9823 GN=ALDH5A1 PE=1 SV=1	ALDH5A1	K00139	1	0.000385609	124.6	2	VEK(1)HVIDAISK	-0.22712	1.99215	1.67125	1.79619	0.242916	0.164325	0.133176
map00650 Butanoate metabolism	0.00273116	2.31	A0A5G2QGS5	189	K	7.57	0.00461557	Up	Acetyl-CoA acetyltransferase 1 OS=Sus scrofa OX=9823 GN=ACAT1 PE=1 SV=1	ACAT1	K00626	1	1.45144e-17	199.61	3	DGLTDVYNK(1)IHMGNCAENTAK	-0.045735	2.1555	2.01764		0.377836	0.183822	0.265202
map00650 Butanoate metabolism	0.00273116	2.31	A0A5G2QGS5	244	K	12.716	0.000615442	Up	Acetyl-CoA acetyltransferase 1 OS=Sus scrofa OX=9823 GN=ACAT1 PE=1 SV=1	ACAT1	K00626	1	9.35826e-08	212.59	2	GK(1)PDTVVKEDEEYKR	-0.14921	1.5701	1.94238	2.05008	0.221611	0.121732	0.0940989
map00650 Butanoate metabolism	0.00273116	2.31	A0A5G2QGS5	250	K	11.974	0.0032655	Up	Acetyl-CoA acetyltransferase 1 OS=Sus scrofa OX=9823 GN=ACAT1 PE=1 SV=1	ACAT1	K00626	1	8.23212e-40	308.74	2	GKPDTVVK(1)EDEEYKR	0.19203	1.50355	1.55256	1.68019	0.181169		0.0825359
map00650 Butanoate metabolism	0.00273116	2.31	A0A5G2QGS5	267	K	12.183	0.0100254	Up	Acetyl-CoA acetyltransferase 1 OS=Sus scrofa OX=9823 GN=ACAT1 PE=1 SV=1	ACAT1	K00626	1	0.00533267	173.11	2	LK(1)TVFQK	0.48107	1.52684	1.38348	1.83026	0.198907		0.0605114
map00650 Butanoate metabolism	0.00273116	2.31	A0A5G2QGS5	123	K	2.893	0.00648098	Up	Acetyl-CoA acetyltransferase 1 OS=Sus scrofa OX=9823 GN=ACAT1 PE=1 SV=1	ACAT1	K00626	1	4.41462e-10	151.42	3	QAVLGAGLPISTPCTTINK(1)VCASGMK	1.4209	1.05519	1.54805	1.46041	0.464522		0.471823
map00650 Butanoate metabolism	0.00273116	2.31	A0A5G2QGS5	222	K	11.922	0.00257753	Up	Acetyl-CoA acetyltransferase 1 OS=Sus scrofa OX=9823 GN=ACAT1 PE=1 SV=1	ACAT1	K00626	1	0.0158276	91.085	2	SK(1)AAWEAGK	-0.74953	2.24838	2.19285		0.26981	0.14756	0.141401
map00650 Butanoate metabolism	0.00273116	2.31	A0A5G2QGS5	262	K	25.223	0.000792457	Up	Acetyl-CoA acetyltransferase 1 OS=Sus scrofa OX=9823 GN=ACAT1 PE=1 SV=1	ACAT1	K00626	1	0.00402759	132.57	2	VDFNK(1)VPK	0.10583	1.23796	1.78037	1.85292		0.0781217	0.050632
map00650 Butanoate metabolism	0.00273116	2.31	A0A5S6HDE4	231	K	2.576	0.00250875	Up	Hydroxyacyl-coenzyme A dehydrogenase, mitochondrial OS=Sus scrofa OX=9823 GN=HADH PE=1 SV=1	HADH	K00022	1	6.94408e-05	150.09	2	GDASK(1)EDIDTAMK	0.26145	1.5284	1.65931	1.1345	0.633765	0.559479	0.484542
map00650 Butanoate metabolism	0.00273116	2.31	A0A5S6HDE4	202	K	18.551	0.000642125	Up	Hydroxyacyl-coenzyme A dehydrogenase, mitochondrial OS=Sus scrofa OX=9823 GN=HADH PE=1 SV=1	HADH	K00022	1	2.6101e-135	417.7	3	HPVSCK(1)DTPGFIVNR	0.22751	2.15088	1.56223	1.97999	0.167468	0.0746803	0.0647446
map00650 Butanoate metabolism	0.00273116	2.31	A0A5S6HDE4	68	K	2.566	0.0197806	Up	Hydroxyacyl-coenzyme A dehydrogenase, mitochondrial OS=Sus scrofa OX=9823 GN=HADH PE=1 SV=1	HADH	K00022	1	0.00335906	129.56	2	K(1)GIEESLR	-0.2846	1.35863	1.55845	1.05167		0.614864	0.41638
map00650 Butanoate metabolism	0.00273116	2.31	A0A5S6HDE4	192	K	6.499	0.000761788	Up	Hydroxyacyl-coenzyme A dehydrogenase, mitochondrial OS=Sus scrofa OX=9823 GN=HADH PE=1 SV=1	HADH	K00022	1	3.51536e-06	201.6	2	TLESLVDFSK(1)TLGK	-0.3572	1.72206	1.91896	1.55885	0.375695	0.194467	0.229971
map00650 Butanoate metabolism	0.00273116	2.31	Q29554	262	K	7.157	0.000148423	Up	Trifunctional enzyme subunit alpha, mitochondrial OS=Sus scrofa OX=9823 GN=HADHA PE=2 SV=1	HADHA	K07515	1	0.0230026	111.39	2	DK(1)GLVEK	1.9227	1.50796	2.12247	1.63404	0.279951	0.203239	0.252339
map00650 Butanoate metabolism	0.00273116	2.31	Q29554	337	K	5.135	0.00990179	Up	Trifunctional enzyme subunit alpha, mitochondrial OS=Sus scrofa OX=9823 GN=HADHA PE=2 SV=1	HADHA	K07515	1	0.000273283	140.14	2	ESK(1)ALMGLYR	0.70982	1.50834	1.78929	1.72442	0.593777	0.169854	0.214311
map00650 Butanoate metabolism	0.00273116	2.31	Q29554	362	K	12.399	0.00224888	Up	Trifunctional enzyme subunit alpha, mitochondrial OS=Sus scrofa OX=9823 GN=HADHA PE=2 SV=1	HADHA	K07515	1	9.1233e-14	179.64	3	EVK(1)HLAILGAGLMGAGIAQVSVDK	-0.67277	1.6314	1.74674	2.17407	0.222383	0.160488	0.064918
map00650 Butanoate metabolism	0.00273116	2.31	Q29554	383	K	19.394	9.94043e-06	Up	Trifunctional enzyme subunit alpha, mitochondrial OS=Sus scrofa OX=9823 GN=HADHA PE=2 SV=1	HADHA	K07515	1	3.28254e-38	274.47	4	HLAILGAGLMGAGIAQVSVDK(1)HLK	-0.1212	2.12967	1.89821	1.67791	0.090733	0.114597	0.0888792
map00650 Butanoate metabolism	0.00273116	2.31	Q29554	644	K	15.327	0.0011441	Up	Trifunctional enzyme subunit alpha, mitochondrial OS=Sus scrofa OX=9823 GN=HADHA PE=2 SV=1	HADHA	K07515	1	8.86086e-20	266.58	2	GFYVYQEGVK(1)NR	0.60213	1.48671	2.30343	1.84236	0.198756	0.100973	0.067768
map00650 Butanoate metabolism	0.00273116	2.31	Q29554	411	K	11.934	0.000413425	Up	Trifunctional enzyme subunit alpha, mitochondrial OS=Sus scrofa OX=9823 GN=HADHA PE=2 SV=1	HADHA	K07515	1	1.50313e-28	286.45	3	GQQQVFK(1)GLNDK(1)VR	1.615	1.57651	2.0978	1.86178	0.219664	0.140402	0.103844
map00650 Butanoate metabolism	0.00273116	2.31	Q29554	309	K	9.663	0.00122596	Up	Trifunctional enzyme subunit alpha, mitochondrial OS=Sus scrofa OX=9823 GN=HADHA PE=2 SV=1	HADHA	K07515	1	5.4447e-28	256.9	3	IIDVVK(1)TGIEQGSDAGYLSESQK	-0.48788	1.59465	1.25306	2.5896	0.237413	0.19424	0.131039
map00650 Butanoate metabolism	0.00273116	2.31	Q29554	406	K	5.333	0.000909967	Up	Trifunctional enzyme subunit alpha, mitochondrial OS=Sus scrofa OX=9823 GN=HADHA PE=2 SV=1	HADHA	K07515	1	1.50313e-28	286.45	3	GQQQVFK(1)GLNDK(1)VR	1.615	1.48731	1.95748	1.60773	0.404543	0.222485	0.320456
map00650 Butanoate metabolism	0.00273116	2.31	Q29554	350	K	14.935	0.00147652	Up	Trifunctional enzyme subunit alpha, mitochondrial OS=Sus scrofa OX=9823 GN=HADHA PE=2 SV=1	HADHA	K07515	1	0.00182356	143.91	2	GQTLCK(1)K(1)NK	-0.2853	1.30268	1.99373	2.32706	0.21086	0.0863472	0.0793269
map00650 Butanoate metabolism	0.00273116	2.31	Q29554	351	K	14.935	0.00147652	Up	Trifunctional enzyme subunit alpha, mitochondrial OS=Sus scrofa OX=9823 GN=HADHA PE=2 SV=1	HADHA	K07515	1	0.00182356	143.91	2	GQTLCK(1)K(1)NK	-0.2853	1.30268	1.99373	2.32706	0.21086	0.0863472	0.0793269
map00650 Butanoate metabolism	0.00273116	2.31	Q29554	386	K	12.376	0.0015873	Up	Trifunctional enzyme subunit alpha, mitochondrial OS=Sus scrofa OX=9823 GN=HADHA PE=2 SV=1	HADHA	K07515	1	0.0143054	129.47	2	HLK(1)TILK	-0.23222	1.92691	1.70284	1.92167	0.239517	0.0732694	0.135795
map00650 Butanoate metabolism	0.00273116	2.31	Q29554	569	K	6.484	0.000221604	Up	Trifunctional enzyme subunit alpha, mitochondrial OS=Sus scrofa OX=9823 GN=HADHA PE=2 SV=1	HADHA	K07515	1	6.69682e-05	145.17	2	ILQEGVGPK(1)K	-0.45387	1.48643	2.22279	1.4891	0.264961	0.295403	0.241316
map00650 Butanoate metabolism	0.00273116	2.31	Q29554	415	K	5.846	0.000430241	Up	Trifunctional enzyme subunit alpha, mitochondrial OS=Sus scrofa OX=9823 GN=HADHA PE=2 SV=1	HADHA	K07515	1	0.0156839	109.71	2	K(1)K(1)ALTSFER	0.00556	1.54473	1.83478	1.74407	0.387967	0.259421	0.22904
map00650 Butanoate metabolism	0.00273116	2.31	Q29554	414	K	6.775	0.000281527	Up	Trifunctional enzyme subunit alpha, mitochondrial OS=Sus scrofa OX=9823 GN=HADHA PE=2 SV=1	HADHA	K07515	1	0.0196487	109.71	2	K(1)K(1)ALTSFER	0.00556	1.58979	1.87795	1.76058	0.3357	0.237865	0.198115
map00650 Butanoate metabolism	0.00273116	2.31	Q29554	597	K	49.862	0.000225682	Up	Trifunctional enzyme subunit alpha, mitochondrial OS=Sus scrofa OX=9823 GN=HADHA PE=2 SV=1	HADHA	K07515	1	1.99798e-98	345.79	4	LDSLTTSFGFPVGAATLMDEVGMDVAK(1)HVAENLGK	0.19193	1.33536	2.20761	2.33906	0.0270586	0.0610966	0.0298099
map00650 Butanoate metabolism	0.00273116	2.31	Q29554	214	K	8.368	0.0165153	Up	Trifunctional enzyme subunit alpha, mitochondrial OS=Sus scrofa OX=9823 GN=HADHA PE=2 SV=1	HADHA	K07515	1	0.000150662	100.08	3	K(1)MGLVDQLVEPLGPGLKPPEER	-0.76534	1.29578	2.1035	1.23176		0.275297	0.0936636
map00650 Butanoate metabolism	0.00273116	2.31	Q29554	292	K	7.381	9.84506e-05	Up	Trifunctional enzyme subunit alpha, mitochondrial OS=Sus scrofa OX=9823 GN=HADHA PE=2 SV=1	HADHA	K07515	1	1.84032e-12	234.92	2	K(1)QTK(1)GLYPAPLK	-0.034596	1.4069	1.90507	1.97215	0.272319	0.225776	0.217793
map00650 Butanoate metabolism	0.00273116	2.31	Q29554	295	K	7.591	0.00013527	Up	Trifunctional enzyme subunit alpha, mitochondrial OS=Sus scrofa OX=9823 GN=HADHA PE=2 SV=1	HADHA	K07515	1	1.84032e-12	234.92	2	QTK(1)GLYPAPLK(1)IIDVVK	0.38096	1.32944	2.05122	1.92096	0.245202	0.217096	0.236093
map00650 Butanoate metabolism	0.00273116	2.31	Q29554	634	K	6.425	0.011437	Up	Trifunctional enzyme subunit alpha, mitochondrial OS=Sus scrofa OX=9823 GN=HADHA PE=2 SV=1	HADHA	K07515	1	5.26918e-05	156.01	2	SGK(1)GFYVYQEGVK	0.6105	1.04396	1.88455	2.26345	0.490762	0.16206	0.155214
map00650 Butanoate metabolism	0.00273116	2.31	Q29554	285	K	23.805	0.00153919	Up	Trifunctional enzyme subunit alpha, mitochondrial OS=Sus scrofa OX=9823 GN=HADHA PE=2 SV=1	HADHA	K07515	1	0.00173611	188.81	2	K(1)VEEK(1)VR	-1.2912	1.59953	1.42516	1.83909	0.0920056	0.044207
map00650 Butanoate metabolism	0.00273116	2.31	Q29554	289	K	23.805	0.00153919	Up	Trifunctional enzyme subunit alpha, mitochondrial OS=Sus scrofa OX=9823 GN=HADHA PE=2 SV=1	HADHA	K07515	1	0.00173611	188.81	2	K(1)VEEK(1)VR	-1.2912	1.59953	1.42516	1.83909	0.0920056	0.044207
map00650 Butanoate metabolism	0.00273116	2.31	Q29554	735	K	3.491	0.0118892	Up	Trifunctional enzyme subunit alpha, mitochondrial OS=Sus scrofa OX=9823 GN=HADHA PE=2 SV=1	HADHA	K07515	1	0.0119138	104.06	2	K(1)YEAIYGK	0.26186	1.23405	2.03733	1.39269	0.638898	0.430363	0.266668
map00650 Butanoate metabolism	0.00273116	2.31	Q29554	742	K	7.604	0.0174953	Up	Trifunctional enzyme subunit alpha, mitochondrial OS=Sus scrofa OX=9823 GN=HADHA PE=2 SV=1	HADHA	K07515	1	3.33074e-56	310.9	3	YEAIYGK(1)QFTPCQLLIDHASSPNK	-0.40933	2.1914	0.973562	2.13768	0.472701	0.137778	0.0868798
map00650 Butanoate metabolism	0.00273116	2.31	Q29554	534	K	4.968	0.000506262	Up	Trifunctional enzyme subunit alpha, mitochondrial OS=Sus scrofa OX=9823 GN=HADHA PE=2 SV=1	HADHA	K07515	1	0.00874134	105.14	2	QGK(1)VIIVVK	0.043046	1.36823	1.52781	2.09859	0.391651	0.323143	0.290575
map00650 Butanoate metabolism	0.00273116	2.31	Q29554	540	K	14.449	0.000158613	Up	Trifunctional enzyme subunit alpha, mitochondrial OS=Sus scrofa OX=9823 GN=HADHA PE=2 SV=1	HADHA	K07515	1	7.99001e-16	250.94	2	VIIVVK(1)DGPGFYTTR	-0.12074	1.60044	2.05039	1.96079	0.178844	0.100987	0.108549
map00650 Butanoate metabolism	0.00273116	2.31	Q29554	625	K	7.608	0.00111284	Up	Trifunctional enzyme subunit alpha, mitochondrial OS=Sus scrofa OX=9823 GN=HADHA PE=2 SV=1	HADHA	K07515	1	0.0025854	118.5	2	QMISK(1)GFLGR	-0.27704	1.1603	1.70591	2.43674	0.275322	0.229837	0.191894
map00650 Butanoate metabolism	0.00273116	2.31	Q29554	505	K	6.295	0.000205172	Up	Trifunctional enzyme subunit alpha, mitochondrial OS=Sus scrofa OX=9823 GN=HADHA PE=2 SV=1	HADHA	K07515	1	1.51822e-08	153.88	3	VIGMHYFSPVDK(1)MQLLEIITTEK(1)TSK	-0.39814	1.33542	1.74453	2.09761	0.265787	0.302348	0.254302
map00650 Butanoate metabolism	0.00273116	2.31	Q29554	46	K	8.052	0.000393129	Up	Trifunctional enzyme subunit alpha, mitochondrial OS=Sus scrofa OX=9823 GN=HADHA PE=2 SV=1	HADHA	K07515	1	3.54276e-40	307.15	3	THINYGVK(1)GDVAVIR	-0.22291	1.61211	1.97531	1.74975	0.298486	0.205942	0.158402
map00650 Butanoate metabolism	0.00273116	2.31	Q29554	249	K	26.732	0.000913743	Up	Trifunctional enzyme subunit alpha, mitochondrial OS=Sus scrofa OX=9823 GN=HADHA PE=2 SV=1	HADHA	K07515	1	1.15063e-11	195.1	2	TIEYLEEVAVTFAK(1)GLADK	0.45096	1.91777	1.70262	1.25795	0.0458436		0.0758183
map00730 Thiamine metabolism	0.378978	1.56	A0A286ZQ79	157	K	2.629	0.0434756	Up	Adenylate kinase isoenzyme 1 OS=Sus scrofa OX=9823 GN=AK1 PE=3 SV=2	AK1	K00939	1	0.00042238	135.55	2	DAMVAK(1)VDTSK	-0.13521	1.31059	1.1152	1.92081	0.911542	0.434503	0.307352
map00730 Thiamine metabolism	0.378978	1.56	A0A286ZQ79	95	K	5.433	0.0175511	Up	Adenylate kinase isoenzyme 1 OS=Sus scrofa OX=9823 GN=AK1 PE=3 SV=2	AK1	K00939	1	2.56042e-07	155.8	2	IIFVVGGPGSGK(1)GTQCEK	0.2788	1.22451	1.03596	2.19304		0.204348	0.342141
map00730 Thiamine metabolism	0.378978	1.56	A0A286ZQ79	83	K	3.356	0.00718373	Up	Adenylate kinase isoenzyme 1 OS=Sus scrofa OX=9823 GN=AK1 PE=3 SV=2	AK1	K00939	1	5.39117e-06	201	2	SK(1)IIFVVGGPGSGK	-0.43181	1.25426	1.2372	2.13102	0.58868	0.342975	0.445864
map00730 Thiamine metabolism	0.378978	1.56	A0A5G2R1T1	320	K	4.876	0.00819679	Up	Cysteine desulfurase, mitochondrial OS=Sus scrofa OX=9823 GN=NFS1 PE=1 SV=1	NFS1	K04487	1	8.44029e-22	192.25	4	SGTVPTPLVVGLGAACEVAQQEMEYDHK(1)R	0.1065	1.34936	1.32625	1.72304	0.39259	0.208761
map00730 Thiamine metabolism	0.378978	1.56	F1SAQ8	182	K	9.291	0.00236575	Up	Nucleoside-diphosphate kinase OS=Sus scrofa OX=9823 GN=AK7 PE=4 SV=3	AK7	K00939	1	4.96123e-06	180.27	3	K(1)HHPNFLDHINAEK	0.26996	1.99572	1.61558		0.199017		0.18968
map00760 Nicotinate and nicotinamide metabolism	0.492932	1.3	A0A5G2RB79	50	K	11.483	0.000789575	Up	NAD-dependent protein deacylase sirtuin-5, mitochondrial OS=Sus scrofa OX=9823 GN=SIRT5 PE=1 SV=1	SIRT5	K11415	1	4.44778e-08	144.4	3	AK(1)HIVVISGAGVSAESGIPTFR	-0.48512	1.75002	1.31935	2.44997	0.1968	0.179606	0.104265
map00760 Nicotinate and nicotinamide metabolism	0.492932	1.3	F1SNB7	397	K	24.941	0.000902356	Up	NAD kinase 2, mitochondrial OS=Sus scrofa OX=9823 GN=NADK2 PE=1 SV=2	NADK2	K00858	1	0.000288957	163.77	2	CFTSK(1)VCVR	-0.332	1.73652	1.98421	2.04797	0.139254	0.0512749	0.0407617
map00760 Nicotinate and nicotinamide metabolism	0.492932	1.3	F1SNB7	120	K	51.924	0.00134848	Up	NAD kinase 2, mitochondrial OS=Sus scrofa OX=9823 GN=NADK2 PE=1 SV=2	NADK2	K00858	1	2.06553e-08	210.14	5	HHIHTK(1)NVEHIVDSLR	0.024522	1.47965	1.57159	2.8354	0.075638	0.0220154	0.0157159
map00760 Nicotinate and nicotinamide metabolism	0.492932	1.3	F1SB15	137	K	9.037	0.000156561	Up	5',3'-nucleotidase, mitochondrial OS=Sus scrofa OX=9823 GN=NT5M PE=4 SV=1	NT5M	K01081	1	0.00814439	106.68	2	MYK(1)YCPFEK	0.044582	1.49284	1.57981	2.32958	0.226155	0.176009	0.195608
map00760 Nicotinate and nicotinamide metabolism	0.492932	1.3	F1SCU0	437	K	7.518	0.00409688	Up	Cytosolic 5'-nucleotidase 1B isoform X1(predicted) OS=Sus scrofa OX=9823 GN=LOC100516797 PE=4 SV=3	LOC100516797	K01081	1	0.00187433	110.84	2	FCLTGGK(1)SPVGYLK	0.036548	1.40689	1.4376	2.45111	0.377348	0.191311	0.135738
map00760 Nicotinate and nicotinamide metabolism	0.492932	1.3	F1SCU0	381	K	4.476	0.00785515	Up	Cytosolic 5'-nucleotidase 1B isoform X1(predicted) OS=Sus scrofa OX=9823 GN=LOC100516797 PE=4 SV=3	LOC100516797	K01081	1	1.4983e-08	233.58	3	FVK(1)ALQHVNAR	0.88787	1.17144	1.8468	1.88603	0.56123	0.315131	0.219364
map00760 Nicotinate and nicotinamide metabolism	0.492932	1.3	F1SCU0	543	K	6.942	0.00479005	Up	Cytosolic 5'-nucleotidase 1B isoform X1(predicted) OS=Sus scrofa OX=9823 GN=LOC100516797 PE=4 SV=3	LOC100516797	K01081	1	0.0114384	111.04	2	FYAK(1)DER	1.6668	1.75048		2.3611	0.410754	0.233705	0.243965
map00760 Nicotinate and nicotinamide metabolism	0.492932	1.3	F1SCU0	205	K	10.1	0.0189085	Up	Cytosolic 5'-nucleotidase 1B isoform X1(predicted) OS=Sus scrofa OX=9823 GN=LOC100516797 PE=4 SV=3	LOC100516797	K01081	1	6.97094e-35	292.35	3	HNTK(1)IYEHSDAWSLGIGR	0.65121	0.887479	1.15087	2.65206	0.200989		0.108603
map00760 Nicotinate and nicotinamide metabolism	0.492932	1.3	F1SCU0	271	K	14.484	0.00201979	Up	Cytosolic 5'-nucleotidase 1B isoform X1(predicted) OS=Sus scrofa OX=9823 GN=LOC100516797 PE=4 SV=3	LOC100516797	K01081	1	1.08435e-37	303.31	2	TPPTEWK(1)SHTQR	0.40137	1.90959	1.23989	2.46303	0.221673	0.081352	0.0844646
map00900 Terpenoid backbone biosynthesis	0.148266	2.59	A0A5G2QGS5	189	K	7.57	0.00461557	Up	Acetyl-CoA acetyltransferase 1 OS=Sus scrofa OX=9823 GN=ACAT1 PE=1 SV=1	ACAT1	K00626	1	1.45144e-17	199.61	3	DGLTDVYNK(1)IHMGNCAENTAK	-0.045735	2.1555	2.01764		0.377836	0.183822	0.265202
map00900 Terpenoid backbone biosynthesis	0.148266	2.59	A0A5G2QGS5	244	K	12.716	0.000615442	Up	Acetyl-CoA acetyltransferase 1 OS=Sus scrofa OX=9823 GN=ACAT1 PE=1 SV=1	ACAT1	K00626	1	9.35826e-08	212.59	2	GK(1)PDTVVKEDEEYKR	-0.14921	1.5701	1.94238	2.05008	0.221611	0.121732	0.0940989
map00900 Terpenoid backbone biosynthesis	0.148266	2.59	A0A5G2QGS5	250	K	11.974	0.0032655	Up	Acetyl-CoA acetyltransferase 1 OS=Sus scrofa OX=9823 GN=ACAT1 PE=1 SV=1	ACAT1	K00626	1	8.23212e-40	308.74	2	GKPDTVVK(1)EDEEYKR	0.19203	1.50355	1.55256	1.68019	0.181169		0.0825359
map00900 Terpenoid backbone biosynthesis	0.148266	2.59	A0A5G2QGS5	267	K	12.183	0.0100254	Up	Acetyl-CoA acetyltransferase 1 OS=Sus scrofa OX=9823 GN=ACAT1 PE=1 SV=1	ACAT1	K00626	1	0.00533267	173.11	2	LK(1)TVFQK	0.48107	1.52684	1.38348	1.83026	0.198907		0.0605114
map00900 Terpenoid backbone biosynthesis	0.148266	2.59	A0A5G2QGS5	123	K	2.893	0.00648098	Up	Acetyl-CoA acetyltransferase 1 OS=Sus scrofa OX=9823 GN=ACAT1 PE=1 SV=1	ACAT1	K00626	1	4.41462e-10	151.42	3	QAVLGAGLPISTPCTTINK(1)VCASGMK	1.4209	1.05519	1.54805	1.46041	0.464522		0.471823
map00900 Terpenoid backbone biosynthesis	0.148266	2.59	A0A5G2QGS5	222	K	11.922	0.00257753	Up	Acetyl-CoA acetyltransferase 1 OS=Sus scrofa OX=9823 GN=ACAT1 PE=1 SV=1	ACAT1	K00626	1	0.0158276	91.085	2	SK(1)AAWEAGK	-0.74953	2.24838	2.19285		0.26981	0.14756	0.141401
map00900 Terpenoid backbone biosynthesis	0.148266	2.59	A0A5G2QGS5	262	K	25.223	0.000792457	Up	Acetyl-CoA acetyltransferase 1 OS=Sus scrofa OX=9823 GN=ACAT1 PE=1 SV=1	ACAT1	K00626	1	0.00402759	132.57	2	VDFNK(1)VPK	0.10583	1.23796	1.78037	1.85292		0.0781217	0.050632
map00900 Terpenoid backbone biosynthesis	0.148266	2.59	I3LDY2	169	K	3.686	0.0253522	Up	Isopentenyl-diphosphate Delta-isomerase OS=Sus scrofa OX=9823 GN=IDI1 PE=1 SV=2	IDI1	K01823	1	3.97295e-46	288.94	3	KDVTLNPDPNEIK(1)SHCYVSQEELK	0.20114	1.06786	1.30338	2.34824	0.67771	0.238345	0.364475
map00920 Sulfur metabolism	0.148266	2.59	F1SN58	155	K	3.945	0.00064788	Up	Sulfide:quinone oxidoreductase, mitochondrial OS=Sus scrofa OX=9823 GN=SQOR PE=1 SV=3	SQOR	K22470	1	0.00106292	127.51	2	IK(1)GLPEGFDHPK	-0.13899	1.7083	1.60504	1.47339	0.521585	0.337705	0.35398
map00920 Sulfur metabolism	0.148266	2.59	F1SN58	372	K	7.077	0.00770019	Up	Sulfide:quinone oxidoreductase, mitochondrial OS=Sus scrofa OX=9823 GN=SQOR PE=1 SV=3	SQOR	K22470	1	4.87606e-97	375.97	2	K(1)YDGYTSCPLVTGYNR	-0.17209	1.18387	2.08105	1.30464	0.273857		0.156583
map00920 Sulfur metabolism	0.148266	2.59	F1SN58	134	K	4.395	0.00304745	Up	Sulfide:quinone oxidoreductase, mitochondrial OS=Sus scrofa OX=9823 GN=SQOR PE=1 SV=3	SQOR	K22470	1	2.87511e-05	138.73	3	NCIHTDNGK(1)EISYR	-0.41462	1.98367	1.75247	1.15175	0.413776	0.436406	0.261927
map00920 Sulfur metabolism	0.148266	2.59	F1SN58	260	K	27.636	0.000183506	Up	Sulfide:quinone oxidoreductase, mitochondrial OS=Sus scrofa OX=9823 GN=SQOR PE=1 SV=3	SQOR	K22470	1	1.38878e-38	305.06	3	NLTINYK(1)QNLIEVR	0.15766	2.18884	1.64166	1.95997	0.105854	0.0535131	0.0501616
map00920 Sulfur metabolism	0.148266	2.59	F1SN58	224	K	43.407	0.00105467	Up	Sulfide:quinone oxidoreductase, mitochondrial OS=Sus scrofa OX=9823 GN=SQOR PE=1 SV=3	SQOR	K22470	1	1.028e-33	281.94	3	SK(1)ANIIFNTSLGAIFGVK	-0.086737	1.62504	1.66175	2.57809	0.0873697	0.0268029	0.0209423
map00920 Sulfur metabolism	0.148266	2.59	F1SN58	365	K	26.393	0.000518244	Up	Sulfide:quinone oxidoreductase, mitochondrial OS=Sus scrofa OX=9823 GN=SQOR PE=1 SV=3	SQOR	K22470	1	3.1045e-09	233.84	2	TISLIMK(1)NQTPTK	-0.20359	1.80138	1.18562	1.88981		0.0669401	0.0562462
map00920 Sulfur metabolism	0.148266	2.59	F1RMV5	169	K	18.84	0.000641764	Up	ETHE1 persulfide dioxygenase OS=Sus scrofa OX=9823 GN=ETHE1 PE=1 SV=3	ETHE1	K17725	1	2.70229e-11	181.41	3	TDFQQGCAK(1)TLYHSVHER	0.89615	2.15778	0.993687	2.54612	0.113425	0.0933819	0.0956105
map00980 Metabolism of xenobiotics by cytochrome P450	0.0340685	2.16	A0A5G2QES7	99	K	3.086	0.0307178	Up	S-(hydroxymethyl)glutathione dehydrogenase OS=Sus scrofa OX=9823 GN=ADH5 PE=1 SV=1	ADH5	K00121	1	0.00314749	114.5	2	FCLNPK(1)TNLCQK	-1.2218	1.13829	1.12488	2.26838	0.75765	0.390613	0.32019
map00980 Metabolism of xenobiotics by cytochrome P450	0.0340685	2.16	A0A5G2Q9E2	94	K	16.152	0.018144	Up	Glutathione S-transferase kappa OS=Sus scrofa OX=9823 GN=GSTK1 PE=1 SV=1	GSTK1	K13299	1	2.37991e-09	219.42	2	DFFSTILGK(1)GSLTAMR	1.3514		1.68494	2.89017	0.281155	0.0622653	0.0814681
map00980 Metabolism of xenobiotics by cytochrome P450	0.0340685	2.16	A0A5G2Q9E2	116	K	3.207	0.0495551	Up	Glutathione S-transferase kappa OS=Sus scrofa OX=9823 GN=GSTK1 PE=1 SV=1	GSTK1	K13299	1	0.00737812	71.548	3	LEHPEMLEK(1)VSR	-0.044694	1.26636	1.52248	1.3506	0.641844		0.218713
map00980 Metabolism of xenobiotics by cytochrome P450	0.0340685	2.16	A0A5G2Q9E2	153	K	14.776	0.000364553	Up	Glutathione S-transferase kappa OS=Sus scrofa OX=9823 GN=GSTK1 PE=1 SV=1	GSTK1	K13299	1	2.19555e-25	257.81	2	VSTPEVK(1)NQLK(1)ETTEAACK	-0.11731	1.84823	1.86779	1.90367	0.194176	0.0893219	0.0968148
map00980 Metabolism of xenobiotics by cytochrome P450	0.0340685	2.16	A0A5G2Q9E2	157	K	16.189	9.89501e-06	Up	Glutathione S-transferase kappa OS=Sus scrofa OX=9823 GN=GSTK1 PE=1 SV=1	GSTK1	K13299	1	2.19555e-25	257.81	2	VSTPEVK(1)NQLK(1)ETTEAACK	-0.11731	1.99485	1.92602	1.73005	0.111045	0.100899	0.137124
map00980 Metabolism of xenobiotics by cytochrome P450	0.0340685	2.16	A0A5G2R0M9	125	K	8.165	0.000557727	Up	Aldo_ket_red domain-containing protein OS=Sus scrofa OX=9823 GN=AKR7A2 PE=1 SV=1	AKR7A2	K15303	1	0.002417	147.52	2	SLK(1)PDSLR	3.8677	1.46208	1.90638	1.9769	0.29951	0.19886	0.15627
map00980 Metabolism of xenobiotics by cytochrome P450	0.0340685	2.16	F1S5N4	128	K	13.673	0.044569	Up	Glutathione-dependent dehydroascorbate reductase OS=Sus scrofa OX=9823 GN=GSTO2 PE=3 SV=1	GSTO2	K00799	1	3.29179e-05	160.91	3	VPHLTK(1)ECLVALR	-0.6671	0.918327	0.86906	2.98017	0.19823		0.0342179
map00980 Metabolism of xenobiotics by cytochrome P450	0.0340685	2.16	F1S5N4	59	K	45.542	0.00415107	Up	Glutathione-dependent dehydroascorbate reductase OS=Sus scrofa OX=9823 GN=GSTO2 PE=3 SV=1	GSTO2	K00799	1	0.000381481	105.52	2	NK(1)PEWYFTK	0.087145	0.984984	1.51004	3.37606	0.0958327	0.0161414	0.0169418
map00980 Metabolism of xenobiotics by cytochrome P450	0.0340685	2.16	F1S605	73	K	9.049	0.000543499	Up	Glutathione S-transferase OS=Sus scrofa OX=9823 GN=GSTM3 PE=1 SV=2	GSTM3	K00799	1	4.02066e-05	204.91	2	NK(1)LTQSNAILR	-0.27267	1.41178	1.45998	2.53118	0.211613	0.160653	0.224792
map00980 Metabolism of xenobiotics by cytochrome P450	0.0340685	2.16	F1S605	128	K	10.587	0.00256581	Up	Glutathione S-transferase OS=Sus scrofa OX=9823 GN=GSTM3 PE=1 SV=2	GSTM3	K00799	1	1.36868e-05	199.03	2	LK(1)PQYLEQLPGQLK	-0.2893	1.36485	1.46619	2.65113	0.254628	0.0944512	0.16875
map00980 Metabolism of xenobiotics by cytochrome P450	0.0340685	2.16	F1S605	140	K	6.27	0.00476155	Up	Glutathione S-transferase OS=Sus scrofa OX=9823 GN=GSTM3 PE=1 SV=2	GSTM3	K00799	1	1.4351e-05	117.31	3	LKPQYLEQLPGQLK(1)QFSLFLGK	0.36304	1.58296	1.13126	2.46052	0.310626	0.165333	0.349298
map00980 Metabolism of xenobiotics by cytochrome P450	0.0340685	2.16	F1S605	5	K	138.077	0.000458039	Up	Glutathione S-transferase OS=Sus scrofa OX=9823 GN=GSTM3 PE=1 SV=2	GSTM3	K00799	1	2.88691e-65	335.73	3	MLSTK(1)SMVLGYWDIRGLAHAIR	-1.0913	1.28408	0.925868	3.74691	0.0155842	0.0102186	0.0173388
map00980 Metabolism of xenobiotics by cytochrome P450	0.0340685	2.16	F1S605	222	K	11.565	0.00172194	Up	Glutathione S-transferase OS=Sus scrofa OX=9823 GN=GSTM3 PE=1 SV=2	GSTM3	K00799	1	0.00173325	151.17	2	MAQWGNK(1)R	-0.54074	1.15054	1.86517	2.50679	0.100256	0.148646	0.228604
map00980 Metabolism of xenobiotics by cytochrome P450	0.0340685	2.16	F1S605	35	K	20.615	0.000699053	Up	Glutathione S-transferase OS=Sus scrofa OX=9823 GN=GSTM3 PE=1 SV=2	GSTM3	K00799	1	7.95488e-29	286.04	3	MLLEFTDTSYEEK(1)R	0.20025	1.52089	1.32763	2.8739	0.134878	0.0712178	0.0714936
map00980 Metabolism of xenobiotics by cytochrome P450	0.0340685	2.16	F1S605	56	K	11.632	0.00141814	Up	Glutathione S-transferase OS=Sus scrofa OX=9823 GN=GSTM3 PE=1 SV=2	GSTM3	K00799	1	7.0013e-12	212.17	3	YK(1)LDLDFPNLPYLMDGK	0.51729	1.20813	1.59672	2.72016	0.11704	0.224464	0.133477
map00982 Drug metabolism - cytochrome P450	0.0340685	2.16	A0A5G2QES7	99	K	3.086	0.0307178	Up	S-(hydroxymethyl)glutathione dehydrogenase OS=Sus scrofa OX=9823 GN=ADH5 PE=1 SV=1	ADH5	K00121	1	0.00314749	114.5	2	FCLNPK(1)TNLCQK	-1.2218	1.13829	1.12488	2.26838	0.75765	0.390613	0.32019
map00982 Drug metabolism - cytochrome P450	0.0340685	2.16	A0A5G2Q9E2	94	K	16.152	0.018144	Up	Glutathione S-transferase kappa OS=Sus scrofa OX=9823 GN=GSTK1 PE=1 SV=1	GSTK1	K13299	1	2.37991e-09	219.42	2	DFFSTILGK(1)GSLTAMR	1.3514		1.68494	2.89017	0.281155	0.0622653	0.0814681
map00982 Drug metabolism - cytochrome P450	0.0340685	2.16	A0A5G2Q9E2	116	K	3.207	0.0495551	Up	Glutathione S-transferase kappa OS=Sus scrofa OX=9823 GN=GSTK1 PE=1 SV=1	GSTK1	K13299	1	0.00737812	71.548	3	LEHPEMLEK(1)VSR	-0.044694	1.26636	1.52248	1.3506	0.641844		0.218713
map00982 Drug metabolism - cytochrome P450	0.0340685	2.16	A0A5G2Q9E2	153	K	14.776	0.000364553	Up	Glutathione S-transferase kappa OS=Sus scrofa OX=9823 GN=GSTK1 PE=1 SV=1	GSTK1	K13299	1	2.19555e-25	257.81	2	VSTPEVK(1)NQLK(1)ETTEAACK	-0.11731	1.84823	1.86779	1.90367	0.194176	0.0893219	0.0968148
map00982 Drug metabolism - cytochrome P450	0.0340685	2.16	A0A5G2Q9E2	157	K	16.189	9.89501e-06	Up	Glutathione S-transferase kappa OS=Sus scrofa OX=9823 GN=GSTK1 PE=1 SV=1	GSTK1	K13299	1	2.19555e-25	257.81	2	VSTPEVK(1)NQLK(1)ETTEAACK	-0.11731	1.99485	1.92602	1.73005	0.111045	0.100899	0.137124
map00982 Drug metabolism - cytochrome P450	0.0340685	2.16	A0A5G2QUP3	104	K	11.874	0.00281841	Up	Amine oxidase OS=Sus scrofa OX=9823 GN=MAOA PE=1 SV=1	MAOA	K00274	1	0.0230777	111.28	2	GK(1)SYPFR	1.314	1.28933	1.30584	2.93877	0.238517	0.0993524	0.12819
map00982 Drug metabolism - cytochrome P450	0.0340685	2.16	A0A5G2QUP3	168	K	9.843	0.00169033	Up	Amine oxidase OS=Sus scrofa OX=9823 GN=MAOA PE=1 SV=1	MAOA	K00274	1	0.0116435	110.81	2	ICWTK(1)TAK	0.031118	1.43424	1.19829	2.0503		0.168682	0.14849
map00982 Drug metabolism - cytochrome P450	0.0340685	2.16	A0A5G2QUP3	136	K	6.376	0.00644752	Up	Amine oxidase OS=Sus scrofa OX=9823 GN=MAOA PE=1 SV=1	MAOA	K00274	1	0.0255059	85.064	2	TMDDMGK(1)K	-0.89681	1.36682	1.29994	1.85995	0.309233	0.164056
map00982 Drug metabolism - cytochrome P450	0.0340685	2.16	F1S5N4	128	K	13.673	0.044569	Up	Glutathione-dependent dehydroascorbate reductase OS=Sus scrofa OX=9823 GN=GSTO2 PE=3 SV=1	GSTO2	K00799	1	3.29179e-05	160.91	3	VPHLTK(1)ECLVALR	-0.6671	0.918327	0.86906	2.98017	0.19823		0.0342179
map00982 Drug metabolism - cytochrome P450	0.0340685	2.16	F1S5N4	59	K	45.542	0.00415107	Up	Glutathione-dependent dehydroascorbate reductase OS=Sus scrofa OX=9823 GN=GSTO2 PE=3 SV=1	GSTO2	K00799	1	0.000381481	105.52	2	NK(1)PEWYFTK	0.087145	0.984984	1.51004	3.37606	0.0958327	0.0161414	0.0169418
map00982 Drug metabolism - cytochrome P450	0.0340685	2.16	F1S605	73	K	9.049	0.000543499	Up	Glutathione S-transferase OS=Sus scrofa OX=9823 GN=GSTM3 PE=1 SV=2	GSTM3	K00799	1	4.02066e-05	204.91	2	NK(1)LTQSNAILR	-0.27267	1.41178	1.45998	2.53118	0.211613	0.160653	0.224792
map00982 Drug metabolism - cytochrome P450	0.0340685	2.16	F1S605	128	K	10.587	0.00256581	Up	Glutathione S-transferase OS=Sus scrofa OX=9823 GN=GSTM3 PE=1 SV=2	GSTM3	K00799	1	1.36868e-05	199.03	2	LK(1)PQYLEQLPGQLK	-0.2893	1.36485	1.46619	2.65113	0.254628	0.0944512	0.16875
map00982 Drug metabolism - cytochrome P450	0.0340685	2.16	F1S605	140	K	6.27	0.00476155	Up	Glutathione S-transferase OS=Sus scrofa OX=9823 GN=GSTM3 PE=1 SV=2	GSTM3	K00799	1	1.4351e-05	117.31	3	LKPQYLEQLPGQLK(1)QFSLFLGK	0.36304	1.58296	1.13126	2.46052	0.310626	0.165333	0.349298
map00982 Drug metabolism - cytochrome P450	0.0340685	2.16	F1S605	5	K	138.077	0.000458039	Up	Glutathione S-transferase OS=Sus scrofa OX=9823 GN=GSTM3 PE=1 SV=2	GSTM3	K00799	1	2.88691e-65	335.73	3	MLSTK(1)SMVLGYWDIRGLAHAIR	-1.0913	1.28408	0.925868	3.74691	0.0155842	0.0102186	0.0173388
map00982 Drug metabolism - cytochrome P450	0.0340685	2.16	F1S605	222	K	11.565	0.00172194	Up	Glutathione S-transferase OS=Sus scrofa OX=9823 GN=GSTM3 PE=1 SV=2	GSTM3	K00799	1	0.00173325	151.17	2	MAQWGNK(1)R	-0.54074	1.15054	1.86517	2.50679	0.100256	0.148646	0.228604
map00982 Drug metabolism - cytochrome P450	0.0340685	2.16	F1S605	35	K	20.615	0.000699053	Up	Glutathione S-transferase OS=Sus scrofa OX=9823 GN=GSTM3 PE=1 SV=2	GSTM3	K00799	1	7.95488e-29	286.04	3	MLLEFTDTSYEEK(1)R	0.20025	1.52089	1.32763	2.8739	0.134878	0.0712178	0.0714936
map00982 Drug metabolism - cytochrome P450	0.0340685	2.16	F1S605	56	K	11.632	0.00141814	Up	Glutathione S-transferase OS=Sus scrofa OX=9823 GN=GSTM3 PE=1 SV=2	GSTM3	K00799	1	7.0013e-12	212.17	3	YK(1)LDLDFPNLPYLMDGK	0.51729	1.20813	1.59672	2.72016	0.11704	0.224464	0.133477
map03008 Ribosome biogenesis in eukaryotes	0.114304	1.85	F1SJV8	160	K	16.494	3.53861e-05	Up	RNA exonuclease 2 OS=Sus scrofa OX=9823 GN=REXO2 PE=1 SV=4	REXO2	K13288	1	0.000425972	182.76	2	YMPQFMK(1)HLHYR	-0.3562	2.16478	1.91845	1.57379	0.13504	0.0944897	0.113452
map03008 Ribosome biogenesis in eukaryotes	0.114304	1.85	A0A287AN65	570	K	4.004	0.0156051	Up	Exportin 1 OS=Sus scrofa OX=9823 GN=XPO1 PE=1 SV=2	XPO1	K14290	1	0.0111643	87.123	2	QLGSILK(1)TNVR	-0.097641	1.14087	1.63093	2.02919	0.680541	0.246364	0.27211
map03008 Ribosome biogenesis in eukaryotes	0.114304	1.85	A0A287BBE8	100	K	5.738	0.000475695	Up	Casein kinase 2 alpha 2 OS=Sus scrofa OX=9823 GN=CSNK2A2 PE=1 SV=1	CSNK2A2	K03097	1	0.00111354	101.6	4	ALDYCHSK(1)GIMHR	-2.4626	1.59418	1.33208	2.18326	0.306416	0.332012	0.252061
map03008 Ribosome biogenesis in eukaryotes	0.114304	1.85	A0A287BBE8	209	K	19.557	0.00126326	Up	Casein kinase 2 alpha 2 OS=Sus scrofa OX=9823 GN=CSNK2A2 PE=1 SV=1	CSNK2A2	K03097	1	9.05983e-05	190.86	2	VLGTDELYGYLK(1)K	0.1723	1.42857	1.53595	1.87067		0.107058	0.0577632
map03008 Ribosome biogenesis in eukaryotes	0.114304	1.85	A0A5G2QZY6	105	K	4.893	0.00569459	Up	GTP-binding nuclear protein Ran OS=Sus scrofa OX=9823 GN=RAN PE=1 SV=1	RAN	K07936	1	0.000135596	200.07	2	VTYK(1)NVPNWHR	-0.58654	1.17391	1.17983	2.62808	0.399927	0.312471	0.305782
map03008 Ribosome biogenesis in eukaryotes	0.114304	1.85	P67872	147	K	8.043	0.00354937	Up	Casein kinase II subunit beta OS=Sus scrofa OX=9823 GN=CSNK2B PE=2 SV=1	CSNK2B	K03115	1	0.000100955	172.98	2	CMDVYTPK(1)SSR	-0.34161	1.30143	1.21341	2.82165	0.286659	0.148415	0.228427
map03008 Ribosome biogenesis in eukaryotes	0.114304	1.85	P67872	139	K	7.776	0.0147529	Up	Casein kinase II subunit beta OS=Sus scrofa OX=9823 GN=CSNK2B PE=2 SV=1	CSNK2B	K03115	1	5.38032e-05	147.74	2	LYCPK(1)CMDVYTPK	-0.67141	1.46398	0.827234	2.31397		0.211193	0.183629
map03018 RNA degradation	0.271663	1.62	F1RGJ3	342	K	34.837	0.000302745	Up	75 kDa glucose-regulated protein OS=Sus scrofa OX=9823 GN=HSPA9 PE=1 SV=4	HSPA9	K04043	1	1.18894e-41	296.16	3	AMQDAEVSK(1)SDIGEVILVGGMTR	2.9905	1.29141	2.63377	1.9074	0.0674407	0.0657922	0.034192
map03018 RNA degradation	0.271663	1.62	F1RGJ3	325	K	9.782	0.00189365	Up	75 kDa glucose-regulated protein OS=Sus scrofa OX=9823 GN=HSPA9 PE=1 SV=4	HSPA9	K04043	1	8.55518e-14	247.96	2	AQFEGIVTDLIK(1)R	-0.53534	1.69373	1.5587	2.19108	0.170457	0.287189	0.0988414
map03018 RNA degradation	0.271663	1.62	F1RGJ3	528	K	11.325	0.00310874	Up	75 kDa glucose-regulated protein OS=Sus scrofa OX=9823 GN=HSPA9 PE=1 SV=4	HSPA9	K04043	1	0.00111548	126.67	2	DDIENMVK(1)NAEK	0.33125	1.77736	1.80728	1.92855	0.292841	0.0729111	0.121052
map03018 RNA degradation	0.271663	1.62	F1RGJ3	103	K	11.674	0.000554202	Up	75 kDa glucose-regulated protein OS=Sus scrofa OX=9823 GN=HSPA9 PE=1 SV=4	HSPA9	K04043	1	0.00366077	135.77	2	DIK(1)NVPFK	-0.13971	1.84553	1.40896	2.27208	0.22742	0.124924	0.121079
map03018 RNA degradation	0.271663	1.62	F1RGJ3	152	K	52.474	0.00416047	Up	75 kDa glucose-regulated protein OS=Sus scrofa OX=9823 GN=HSPA9 PE=1 SV=4	HSPA9	K04043	1	3.62472e-28	202.58	3	ETAENYLGHTAK(1)NAVITVPAYFNDSQR	0.42335	2.27947	1.75055	1.85778	0.00592061	0.0636331	0.0426508
map03018 RNA degradation	0.271663	1.62	F1RGJ3	265	K	8.848	0.0299604	Up	75 kDa glucose-regulated protein OS=Sus scrofa OX=9823 GN=HSPA9 PE=1 SV=4	HSPA9	K04043	1	5.92944e-40	300.89	2	ETGVDLTK(1)DNMALQR	0.62539		2.3975	1.19631	0.232798	0.173394
map03018 RNA degradation	0.271663	1.62	F1RGJ3	565	K	2.784	0.0234855	Up	75 kDa glucose-regulated protein OS=Sus scrofa OX=9823 GN=HSPA9 PE=1 SV=4	HSPA9	K04043	1	4.39771e-22	266.74	2	MEEFK(1)DQLPADECNK	-0.50561	1.52088	1.67694	1.21671	0.403246	0.323382	0.858834
map03018 RNA degradation	0.271663	1.62	F1RGJ3	359	K	14.007	0.000623636	Up	75 kDa glucose-regulated protein OS=Sus scrofa OX=9823 GN=HSPA9 PE=1 SV=4	HSPA9	K04043	1	1.58999e-39	315.13	3	MPK(1)VQQTVQDLFGR	-1.6914	1.28822	2.07194	2.24002	0.194017	0.102187	0.103616
map03018 RNA degradation	0.271663	1.62	F1RGJ3	100	K	4.15	0.00213714	Up	75 kDa glucose-regulated protein OS=Sus scrofa OX=9823 GN=HSPA9 PE=1 SV=4	HSPA9	K04043	1	1.1409e-12	247.13	2	YDDPEVQK(1)DIK	-0.21289	1.5036	2.20524	1.12609	0.380212	0.410039	0.374822
map03018 RNA degradation	0.271663	1.62	A0A287ATN8	58	K	22.05	3.44271e-05	Up	60 kDa chaperonin OS=Sus scrofa OX=9823 GN=HSPD1 PE=1 SV=1	HSPD1	K04077	1	2.53861e-12	173.58	3	ALMLQGVDLLADAVAVTMGPK(1)GR	-0.1519	1.51486	1.74759	1.59082		0.0788	0.0679322
map03018 RNA degradation	0.271663	1.62	A0A287ATN8	359	K	2.718	0.0457344	Up	60 kDa chaperonin OS=Sus scrofa OX=9823 GN=HSPD1 PE=1 SV=1	HSPD1	K04077	1	0.00953437	103.56	2	DDAMLLK(1)GK	-0.4402	1.10206	1.63393	1.65039	0.975489	0.318327	0.319798
map03018 RNA degradation	0.271663	1.62	A0A287ATN8	205	K	12.767	0.000344302	Up	60 kDa chaperonin OS=Sus scrofa OX=9823 GN=HSPD1 PE=1 SV=1	HSPD1	K04077	1	2.11923e-16	254.47	2	DGK(1)TLNDELEIIEGMK	-0.25632	1.66014	1.73216	2.17188	0.188965	0.0926976	0.154158
map03018 RNA degradation	0.271663	1.62	A0A287ATN8	191	K	6.072	0.0101469	Up	60 kDa chaperonin OS=Sus scrofa OX=9823 GN=HSPD1 PE=1 SV=1	HSPD1	K04077	1	3.03527e-05	172.88	2	EIGNIISDAMK(1)K	-0.20863	1.14996	1.70161	1.65377	0.334534	0.160136
map03018 RNA degradation	0.271663	1.62	A0A287ATN8	156	K	23.939	0.00170586	Up	60 kDa chaperonin OS=Sus scrofa OX=9823 GN=HSPD1 PE=1 SV=1	HSPD1	K04077	1	1.38748e-06	151.98	2	GVMLAVDAVIAELK(1)K	0.087446	1.00689	1.82176	2.03588		0.0741241	0.0613448
map03018 RNA degradation	0.271663	1.62	A0A287ATN8	292	K	36.844	9.40311e-07	Up	60 kDa chaperonin OS=Sus scrofa OX=9823 GN=HSPD1 PE=1 SV=1	HSPD1	K04077	1	0.0028913	112.8	2	LK(1)VGLQVVAVK	-0.591	1.95029	1.87864	2.01253	0.0461197	0.0582791	0.0541463
map03018 RNA degradation	0.271663	1.62	A0A287ATN8	72	K	4.643	0.0169023	Up	60 kDa chaperonin OS=Sus scrofa OX=9823 GN=HSPD1 PE=1 SV=1	HSPD1	K04077	1	2.97506e-07	198.49	2	TVIIEQSWGSPK(1)VTK	-0.076069	1.43376	2.09362	1.40931	0.665426	0.175365	0.22251
map03018 RNA degradation	0.271663	1.62	A0A287ATN8	352	K	11.316	0.00244626	Up	60 kDa chaperonin OS=Sus scrofa OX=9823 GN=HSPD1 PE=1 SV=1	HSPD1	K04077	1	8.65723e-05	132.5	2	VGEVIVTK(1)DDAMLLK	-0.21896	2.0677	2.34712		0.277512	0.156074	0.151597
map03018 RNA degradation	0.271663	1.62	A0A287ATN8	417	K	6.758	0.00100549	Up	60 kDa chaperonin OS=Sus scrofa OX=9823 GN=HSPD1 PE=1 SV=1	HSPD1	K04077	1	5.53116e-39	314.35	2	VGGTSDVEVNEK(1)K	1.0822	1.65332	1.94133	1.63196	0.233559	0.367757	0.172077
map03018 RNA degradation	0.271663	1.62	A0A287ATN8	91	K	21.244	0.000378877	Up	60 kDa chaperonin OS=Sus scrofa OX=9823 GN=HSPD1 PE=1 SV=1	HSPD1	K04077	1	0.0143671	138.85	2	YK(1)NIGAK	-1.7125	1.91354	1.66677	2.14996	0.140878	0.0564837	0.0723748
map03018 RNA degradation	0.271663	1.62	I3LK59	343	K	3.171	0.00999385	Up	2-phospho-D-glycerate hydro-lyase OS=Sus scrofa OX=9823 GN=ENO1 PE=1 SV=3	ENO1	K01689	1	1.26995e-22	220.86	3	SCNCLLLK(1)VNQIGSVTESLQACK	-0.37956	1.01624	1.32546	2.21966	0.440753	0.44856	0.549329
map03018 RNA degradation	0.271663	1.62	I3LK59	28	K	3.349	0.00761987	Up	2-phospho-D-glycerate hydro-lyase OS=Sus scrofa OX=9823 GN=ENO1 PE=1 SV=3	ENO1	K01689	1	7.68637e-83	357.91	2	GNPTVEVDLHTAK(1)GLFR	-0.58225	1.35256	1.5779	1.68993	0.704122	0.351704	0.323785
map03018 RNA degradation	0.271663	1.62	I3LK59	281	K	2.912	0.0043442	Up	2-phospho-D-glycerate hydro-lyase OS=Sus scrofa OX=9823 GN=ENO1 PE=1 SV=3	ENO1	K01689	1	5.03185e-07	170.18	3	YISPDQLADLYK(1)SFIR	0.23146	1.42616	1.2829	1.35942		0.547818	0.383702
map03018 RNA degradation	0.271663	1.62	F1S4S3	20	K	5.751	0.00749399	Up	2-phospho-D-glycerate hydro-lyase OS=Sus scrofa OX=9823 GN=ENO4 PE=3 SV=4	ENO4	K01689	1	6.80195e-05	177.7	2	LK(1)QQALEYYR	-0.02886	1.56715	1.0337	2.51044	0.447789	0.216263	0.224661
map03018 RNA degradation	0.271663	1.62	Q1KYT0	80	K	12.668	0.0019594	Up	Beta-enolase OS=Sus scrofa OX=9823 GN=ENO3 PE=2 SV=1	ENO3	K01689	1	0.00811492	93.111	2	TLGPALLEK(1)K	-1.5338	1.60927	1.67882	1.46193	0.164851	0.0851296
map03018 RNA degradation	0.271663	1.62	Q1KYT0	28	K	2.74	0.0413296	Up	Beta-enolase OS=Sus scrofa OX=9823 GN=ENO3 PE=2 SV=1	ENO3	K01689	1	7.49674e-05	121.31	3	GNPTVEVDLHTAK(1)GR	0.86584	1.59564	1.59383	0.83211	0.474158	0.504258
map04020 Calcium signaling pathway	0.0607546	1.56	A0A287AXS7	272	K	14.258	3.42796e-06	Up	ADP/ATP translocase OS=Sus scrofa OX=9823 GN=SLC25A6 PE=3 SV=1	SLC25A6	K05863	1	1.21053e-08	230.06	2	AFFK(1)GAWSNVLR	-0.054483	1.93124	2.03616	1.63937	0.13473	0.122626	0.135878
map04020 Calcium signaling pathway	0.0607546	1.56	A0A287AXS7	92	K	16.647	0.000108304	Up	ADP/ATP translocase OS=Sus scrofa OX=9823 GN=SLC25A6 PE=3 SV=1	SLC25A6	K05863	1	5.90757e-05	188.06	2	YFPTQALNFAFK(1)DK	0.1425	1.45817	2.06844	2.13338	0.136255	0.0852693	0.118482
map04020 Calcium signaling pathway	0.0607546	1.56	A0A287AXS7	23	K	54.758	0.000286797	Up	ADP/ATP translocase OS=Sus scrofa OX=9823 GN=SLC25A6 PE=3 SV=1	SLC25A6	K05863	1	4.73283e-88	367.11	3	DFLAGGIAAAISK(1)TAVAPIER	0.58465	1.78664	1.82836	2.27739	0.0619379	0.0248301	0.0208397
map04020 Calcium signaling pathway	0.0607546	1.56	A0A287AXS7	155	K	13.089	0.00531389	Up	ADP/ATP translocase OS=Sus scrofa OX=9823 GN=SLC25A6 PE=3 SV=1	SLC25A6	K05863	1	0.0192408	81.263	2	EFK(1)GLGDCLVK	0.44072	1.25837	1.76001	1.73931	0.17229	0.0700272
map04020 Calcium signaling pathway	0.0607546	1.56	A0A287AXS7	252	K	18.099	0.000558716	Up	ADP/ATP translocase OS=Sus scrofa OX=9823 GN=SLC25A6 PE=3 SV=1	SLC25A6	K05863	1	1.20617e-21	271.04	2	KGADIMYK(1)GTLDCWR	0.38866	1.54451	2.20434	1.937	0.14954	0.0581262	0.106486
map04020 Calcium signaling pathway	0.0607546	1.56	A0A287AXS7	166	K	38.013	7.62449e-05	Up	ADP/ATP translocase OS=Sus scrofa OX=9823 GN=SLC25A6 PE=3 SV=1	SLC25A6	K05863	1	0.00173218	155.51	2	ITK(1)SDGIR	-0.57349	1.84263	1.43413	1.63706	0.0473014	0.0388759
map04020 Calcium signaling pathway	0.0607546	1.56	A0A287AXS7	147	K	30.396	0.000215129	Up	ADP/ATP translocase OS=Sus scrofa OX=9823 GN=SLC25A6 PE=3 SV=1	SLC25A6	K05863	1	6.64585e-05	177.44	2	LAADVGK(1)SATER	0.125	1.76263	1.54759	2.49868	0.0941178	0.0441317	0.0528559
map04020 Calcium signaling pathway	0.0607546	1.56	A0A287AXS7	105	K	35.954	0.000876277	Up	ADP/ATP translocase OS=Sus scrofa OX=9823 GN=SLC25A6 PE=3 SV=1	SLC25A6	K05863	1	6.89096e-81	372.44	2	QIFLGGVDK(1)HTQFWR	0.47303	1.07731	1.70168	2.13	0.0480929	0.04293
map04020 Calcium signaling pathway	0.0607546	1.56	F2Z565	23	K	19.868	0.00555429	Up	ADP/ATP translocase OS=Sus scrofa OX=9823 GN=SLC25A5 PE=1 SV=1	SLC25A5	K05863	1	1.25466e-60	333.11	3	DFLAGGVAAAISK(1)TAVAPIER	0.15953	1.107	2.05539	2.55009	0.205862	0.0441434	0.037517
map04020 Calcium signaling pathway	0.0607546	1.56	F2Z565	166	K	35.583	0.000141807	Up	ADP/ATP translocase OS=Sus scrofa OX=9823 GN=SLC25A5 PE=1 SV=1	SLC25A5	K05863	1	0.000497473	190.88	2	IYK(1)SDGIR	-0.019285	1.69369	1.65733	2.48498	0.0792574	0.0385687	0.0461826
map04020 Calcium signaling pathway	0.0607546	1.56	A0A286ZIE8	166	K	46.698	0.000427864	Up	ADP/ATP translocase OS=Sus scrofa OX=9823 GN=SLC25A4 PE=1 SV=1	SLC25A4	K05863	1	0.00325799	139.28	2	IFK(1)SDGLR	-0.23099	1.51104	2.03043	2.33274	0.0609804	0.0193884	0.0454216
map04020 Calcium signaling pathway	0.0607546	1.56	A0A5G2QW89	277	K	21.902	0.000768138	Up	Calcium uniporter protein OS=Sus scrofa OX=9823 GN=MCU PE=1 SV=1	MCU	K20858	1	1.19489e-05	208.6	2	DAIAQAEMDLK(1)R	0.34473	1.4506	1.37067	2.03103		0.0590969	0.0885979
map04020 Calcium signaling pathway	0.0607546	1.56	A0A287ACC3	285	K	3.237	0.0314652	Up	cAMP-dependent protein kinase OS=Sus scrofa OX=9823 GN=PRKACA PE=3 SV=2	PRKACA	K04345	1	0.000323795	185.58	2	NGVNDIK(1)NHK	-0.23876	1.87736	0.955176	1.75124	0.791623	0.286088	0.338512
map04020 Calcium signaling pathway	0.0607546	1.56	A0A287ACC3	40	K	3.783	0.00651242	Up	cAMP-dependent protein kinase OS=Sus scrofa OX=9823 GN=PRKACA PE=3 SV=2	PRKACA	K04345	1	0.000201686	191.45	2	IK(1)TLGTGSFGR	0.11446	1.19139	1.29102	2.26314	0.539025	0.394771	0.320649
map04020 Calcium signaling pathway	0.0607546	1.56	A0A287ACC3	247	K	2.569	0.048705	Up	cAMP-dependent protein kinase OS=Sus scrofa OX=9823 GN=PRKACA PE=3 SV=2	PRKACA	K04345	1	0.0146416	144.29	2	IVSGK(1)VR	0.014451	1.26466	1.3243	1.72987	1.0033	0.293093	0.384772
map04020 Calcium signaling pathway	0.0607546	1.56	A0A287ACC3	272	K	4.567	0.0244407	Up	cAMP-dependent protein kinase OS=Sus scrofa OX=9823 GN=PRKACA PE=3 SV=2	PRKACA	K04345	1	7.55044e-06	215.14	2	NLLQVDLTK(1)R	0.065852	1.27577	1.25106	2.39538	0.688618	0.191924	0.197244
map04020 Calcium signaling pathway	0.0607546	1.56	A0A287AHS0	21	K	4.754	0.00469786	Up	Calmodulin(predicted) OS=Sus scrofa OX=9823 GN=CALM3 PE=1 SV=1	CALM3	K02183	1	1.01745e-19	255.16	2	EAFSLFDK(1)DGDGTITTK	0.14526	1.61881	1.6203	1.71819	0.565219	0.228495	0.248997
map04020 Calcium signaling pathway	0.0607546	1.56	A0A287AHS0	94	K	9.598	0.00170787	Up	Calmodulin(predicted) OS=Sus scrofa OX=9823 GN=CALM3 PE=1 SV=1	CALM3	K02183	1	3.62565e-40	305.84	3	VFDK(1)DGNGYISAAELR	-0.021987	1.60934	1.73629	2.08824	0.314341	0.123679	0.128108
map04020 Calcium signaling pathway	0.0607546	1.56	A0A287AP21	73	K	21.747	0.000242832	Up	Peptidyl-prolyl cis-trans isomerase OS=Sus scrofa OX=9823 GN=PPIF PE=1 SV=1	PPIF	K09565	1	0.00302105	115.18	2	ADVVPK(1)TAENFR	-0.69507	1.83606	1.72917	2.17099	0.134289	0.063283	0.0661998
map04020 Calcium signaling pathway	0.0607546	1.56	A0A287AP21	167	K	19.202	0.0036815	Up	Peptidyl-prolyl cis-trans isomerase OS=Sus scrofa OX=9823 GN=PPIF PE=1 SV=1	PPIF	K09565	1	0.000466542	103.21	3	TDWLDGK(1)HVVFGHVK	-0.26607	1.01845	1.59231	2.22147	0.106118	0.0616487
map04020 Calcium signaling pathway	0.0607546	1.56	A0A287AP21	67	K	35.389	0.000241846	Up	Peptidyl-prolyl cis-trans isomerase OS=Sus scrofa OX=9823 GN=PPIF PE=1 SV=1	PPIF	K09565	1	0.00249968	117.98	2	VVLELK(1)ADVVPK	0.272	2.05399	2.25726	1.52386	0.0515447	0.0811254	0.0322147
map04020 Calcium signaling pathway	0.0607546	1.56	A0A5G2QC85	382	K	2.222	0.0286319	Up	Phosphoinositide phospholipase C OS=Sus scrofa OX=9823 GN=PLCZ1 PE=4 SV=1	PLCZ1	K05861	1	3.3359e-06	126.17	2	IATALSDLVIYTK(1)VEK	-0.20873	1.17597	1.11705	1.553	0.695598	0.458385
map04020 Calcium signaling pathway	0.0607546	1.56	F1SE26	64	K	207.372	4.86232e-05	Up	Voltage-dependent anion-selective channel protein 3 OS=Sus scrofa OX=9823 GN=VDAC3 PE=1 SV=3	VDAC3	K15041	1	3.63676e-12	230.41	2	YK(1)ICDYGLTFTQK	1.1672	1.51472	2.37039	2.0861	0.012526	0.00546187	0.0108068
map04020 Calcium signaling pathway	0.0607546	1.56	F1SE26	12	K	39.844	0.00010968	Up	Voltage-dependent anion-selective channel protein 3 OS=Sus scrofa OX=9823 GN=VDAC3 PE=1 SV=3	VDAC3	K15041	1	1.5698e-05	174.4	2	CNTPTYCDLGK(1)AAK	0.069922	1.34407	2.86242	1.64662	0.0468431	0.0433369	0.0567201
map04020 Calcium signaling pathway	0.0607546	1.56	F1SE26	28	K	180.733	2.93037e-05	Up	Voltage-dependent anion-selective channel protein 3 OS=Sus scrofa OX=9823 GN=VDAC3 PE=1 SV=3	VDAC3	K15041	1	0.000281614	140.05	2	GYGFGMVK(1)IDLR	-0.28235	1.60456	1.72086	1.65621	0.00771306		0.0106626
map04020 Calcium signaling pathway	0.0607546	1.56	F1RRA6	215	K	39.974	0.00104458	Up	ADP/ATP translocase OS=Sus scrofa OX=9823 GN=SLC25A31 PE=3 SV=3	SLC25A31	K05863	1	1.32111e-06	147.71	2	ASYFGAYDTVK(1)GLLPK	-0.15014	1.10107	1.72213	2.09478	0.0328034	0.0492167
map04020 Calcium signaling pathway	0.0607546	1.56	F1RRA6	171	K	26.465	0.00101308	Up	ADP/ATP translocase OS=Sus scrofa OX=9823 GN=SLC25A31 PE=3 SV=3	SLC25A31	K05863	1	0.00145154	121.5	2	QFK(1)GLGDCIVK	0.077588	1.1325	1.84375	2.80529	0.11194	0.0427092	0.0638128
map04020 Calcium signaling pathway	0.0607546	1.56	F1S2F6	74	K	283.335	1.82758e-06	Up	Voltage-dependent anion-selective channel protein 2 OS=Sus scrofa OX=9823 GN=VDAC2 PE=3 SV=3	VDAC2	K15040	1	1.67683e-09	236.57	3	YK(1)WCEYGLTFTEK	0.75324	1.68526	2.23826	2.05538	0.0061038	0.00647463	0.00852342
map04020 Calcium signaling pathway	0.0607546	1.56	Q29380	34	K	72.52	0.000138442	Up	Voltage-dependent anion-selective channel protein 3 OS=Sus scrofa OX=9823 GN=VDAC3 PE=2 SV=2	VDAC3	K15041	1	4.81093e-88	366.99	3	TK(1)SCSGVEFSTSGHAYTDTGK	0.64552	2.27947	1.43616	2.20276	0.0407486	0.0163791	0.024483
map04022 cGMP-PKG signaling pathway	0.0315241	1.64	A0A287AXS7	272	K	14.258	3.42796e-06	Up	ADP/ATP translocase OS=Sus scrofa OX=9823 GN=SLC25A6 PE=3 SV=1	SLC25A6	K05863	1	1.21053e-08	230.06	2	AFFK(1)GAWSNVLR	-0.054483	1.93124	2.03616	1.63937	0.13473	0.122626	0.135878
map04022 cGMP-PKG signaling pathway	0.0315241	1.64	A0A287AXS7	92	K	16.647	0.000108304	Up	ADP/ATP translocase OS=Sus scrofa OX=9823 GN=SLC25A6 PE=3 SV=1	SLC25A6	K05863	1	5.90757e-05	188.06	2	YFPTQALNFAFK(1)DK	0.1425	1.45817	2.06844	2.13338	0.136255	0.0852693	0.118482
map04022 cGMP-PKG signaling pathway	0.0315241	1.64	A0A287AXS7	23	K	54.758	0.000286797	Up	ADP/ATP translocase OS=Sus scrofa OX=9823 GN=SLC25A6 PE=3 SV=1	SLC25A6	K05863	1	4.73283e-88	367.11	3	DFLAGGIAAAISK(1)TAVAPIER	0.58465	1.78664	1.82836	2.27739	0.0619379	0.0248301	0.0208397
map04022 cGMP-PKG signaling pathway	0.0315241	1.64	A0A287AXS7	155	K	13.089	0.00531389	Up	ADP/ATP translocase OS=Sus scrofa OX=9823 GN=SLC25A6 PE=3 SV=1	SLC25A6	K05863	1	0.0192408	81.263	2	EFK(1)GLGDCLVK	0.44072	1.25837	1.76001	1.73931	0.17229	0.0700272
map04022 cGMP-PKG signaling pathway	0.0315241	1.64	A0A287AXS7	252	K	18.099	0.000558716	Up	ADP/ATP translocase OS=Sus scrofa OX=9823 GN=SLC25A6 PE=3 SV=1	SLC25A6	K05863	1	1.20617e-21	271.04	2	KGADIMYK(1)GTLDCWR	0.38866	1.54451	2.20434	1.937	0.14954	0.0581262	0.106486
map04022 cGMP-PKG signaling pathway	0.0315241	1.64	A0A287AXS7	166	K	38.013	7.62449e-05	Up	ADP/ATP translocase OS=Sus scrofa OX=9823 GN=SLC25A6 PE=3 SV=1	SLC25A6	K05863	1	0.00173218	155.51	2	ITK(1)SDGIR	-0.57349	1.84263	1.43413	1.63706	0.0473014	0.0388759
map04022 cGMP-PKG signaling pathway	0.0315241	1.64	A0A287AXS7	147	K	30.396	0.000215129	Up	ADP/ATP translocase OS=Sus scrofa OX=9823 GN=SLC25A6 PE=3 SV=1	SLC25A6	K05863	1	6.64585e-05	177.44	2	LAADVGK(1)SATER	0.125	1.76263	1.54759	2.49868	0.0941178	0.0441317	0.0528559
map04022 cGMP-PKG signaling pathway	0.0315241	1.64	A0A287AXS7	105	K	35.954	0.000876277	Up	ADP/ATP translocase OS=Sus scrofa OX=9823 GN=SLC25A6 PE=3 SV=1	SLC25A6	K05863	1	6.89096e-81	372.44	2	QIFLGGVDK(1)HTQFWR	0.47303	1.07731	1.70168	2.13	0.0480929	0.04293
map04022 cGMP-PKG signaling pathway	0.0315241	1.64	F2Z565	23	K	19.868	0.00555429	Up	ADP/ATP translocase OS=Sus scrofa OX=9823 GN=SLC25A5 PE=1 SV=1	SLC25A5	K05863	1	1.25466e-60	333.11	3	DFLAGGVAAAISK(1)TAVAPIER	0.15953	1.107	2.05539	2.55009	0.205862	0.0441434	0.037517
map04022 cGMP-PKG signaling pathway	0.0315241	1.64	F2Z565	166	K	35.583	0.000141807	Up	ADP/ATP translocase OS=Sus scrofa OX=9823 GN=SLC25A5 PE=1 SV=1	SLC25A5	K05863	1	0.000497473	190.88	2	IYK(1)SDGIR	-0.019285	1.69369	1.65733	2.48498	0.0792574	0.0385687	0.0461826
map04022 cGMP-PKG signaling pathway	0.0315241	1.64	A0A286ZIE8	166	K	46.698	0.000427864	Up	ADP/ATP translocase OS=Sus scrofa OX=9823 GN=SLC25A4 PE=1 SV=1	SLC25A4	K05863	1	0.00325799	139.28	2	IFK(1)SDGLR	-0.23099	1.51104	2.03043	2.33274	0.0609804	0.0193884	0.0454216
map04022 cGMP-PKG signaling pathway	0.0315241	1.64	A0A286ZS14	231	K	9.57	0.0127889	Up	Sodium/potassium-transporting ATPase subunit beta OS=Sus scrofa OX=9823 GN=ATP1B3 PE=1 SV=1	ATP1B3	K01540	1	0.0124418	97.798	2	VAFK(1)VTVHA	0.11535	1.03511	1.2241	2.41518	0.216186	0.109428
map04022 cGMP-PKG signaling pathway	0.0315241	1.64	Q2EHH7	238	K	9.339	0.0185176	Up	Serine/threonine-protein phosphatase OS=Sus scrofa OX=9823 GN=PPP1CC PE=1 SV=1	PPP1CC	K06269	1	6.64718e-05	196.88	3	FLHK(1)HDLDLICR	-0.14117	0.891869	1.03367	3.49411	0.347697	0.123593	0.109064
map04022 cGMP-PKG signaling pathway	0.0315241	1.64	Q2EHH7	26	K	6.91	0.0162667	Up	Serine/threonine-protein phosphatase OS=Sus scrofa OX=9823 GN=PPP1CC PE=1 SV=1	PPP1CC	K06269	1	4.80925e-14	254.19	3	PGK(1)NVQLQENEIR	-0.782	1.57031	0.839396	2.83178	0.434978	0.174473	0.149053
map04022 cGMP-PKG signaling pathway	0.0315241	1.64	Q2EHH7	141	K	5.645	0.022184	Up	Serine/threonine-protein phosphatase OS=Sus scrofa OX=9823 GN=PPP1CC PE=1 SV=1	PPP1CC	K06269	1	7.19437e-09	234.35	3	IYGFYDECK(1)R	-1.433	1.18994	1.28272	1.99926	0.382265	0.145819
map04022 cGMP-PKG signaling pathway	0.0315241	1.64	Q2EHH7	150	K	8.099	0.00625551	Up	Serine/threonine-protein phosphatase OS=Sus scrofa OX=9823 GN=PPP1CC PE=1 SV=1	PPP1CC	K06269	1	3.29416e-31	272.16	2	LWK(1)TFTDCFNCLPIAAIVDEK	0.12357	1.12928	1.88026	2.33103	0.329852	0.228552	0.101024
map04022 cGMP-PKG signaling pathway	0.0315241	1.64	Q2EHH7	147	K	4.224	0.00659646	Up	Serine/threonine-protein phosphatase OS=Sus scrofa OX=9823 GN=PPP1CC PE=1 SV=1	PPP1CC	K06269	1	0.0241688	109.63	2	YNIK(1)LWK	-0.35071	1.35882	1.40799	2.08458	0.591342	0.290998	0.266277
map04022 cGMP-PKG signaling pathway	0.0315241	1.64	Q2EHH7	260	K	4.553	0.00677659	Up	Serine/threonine-protein phosphatase OS=Sus scrofa OX=9823 GN=PPP1CC PE=1 SV=1	PPP1CC	K06269	1	2.74093e-65	347.73	2	AHQVVEDGYEFFAK(1)R	-0.16688	1.45301	1.04988	2.41669	0.439448	0.379408	0.261569
map04022 cGMP-PKG signaling pathway	0.0315241	1.64	A0A287AHS0	21	K	4.754	0.00469786	Up	Calmodulin(predicted) OS=Sus scrofa OX=9823 GN=CALM3 PE=1 SV=1	CALM3	K02183	1	1.01745e-19	255.16	2	EAFSLFDK(1)DGDGTITTK	0.14526	1.61881	1.6203	1.71819	0.565219	0.228495	0.248997
map04022 cGMP-PKG signaling pathway	0.0315241	1.64	A0A287AHS0	94	K	9.598	0.00170787	Up	Calmodulin(predicted) OS=Sus scrofa OX=9823 GN=CALM3 PE=1 SV=1	CALM3	K02183	1	3.62565e-40	305.84	3	VFDK(1)DGNGYISAAELR	-0.021987	1.60934	1.73629	2.08824	0.314341	0.123679	0.128108
map04022 cGMP-PKG signaling pathway	0.0315241	1.64	A0A287AP21	73	K	21.747	0.000242832	Up	Peptidyl-prolyl cis-trans isomerase OS=Sus scrofa OX=9823 GN=PPIF PE=1 SV=1	PPIF	K09565	1	0.00302105	115.18	2	ADVVPK(1)TAENFR	-0.69507	1.83606	1.72917	2.17099	0.134289	0.063283	0.0661998
map04022 cGMP-PKG signaling pathway	0.0315241	1.64	A0A287AP21	167	K	19.202	0.0036815	Up	Peptidyl-prolyl cis-trans isomerase OS=Sus scrofa OX=9823 GN=PPIF PE=1 SV=1	PPIF	K09565	1	0.000466542	103.21	3	TDWLDGK(1)HVVFGHVK	-0.26607	1.01845	1.59231	2.22147	0.106118	0.0616487
map04022 cGMP-PKG signaling pathway	0.0315241	1.64	A0A287AP21	67	K	35.389	0.000241846	Up	Peptidyl-prolyl cis-trans isomerase OS=Sus scrofa OX=9823 GN=PPIF PE=1 SV=1	PPIF	K09565	1	0.00249968	117.98	2	VVLELK(1)ADVVPK	0.272	2.05399	2.25726	1.52386	0.0515447	0.0811254	0.0322147
map04022 cGMP-PKG signaling pathway	0.0315241	1.64	F1SE26	64	K	207.372	4.86232e-05	Up	Voltage-dependent anion-selective channel protein 3 OS=Sus scrofa OX=9823 GN=VDAC3 PE=1 SV=3	VDAC3	K15041	1	3.63676e-12	230.41	2	YK(1)ICDYGLTFTQK	1.1672	1.51472	2.37039	2.0861	0.012526	0.00546187	0.0108068
map04022 cGMP-PKG signaling pathway	0.0315241	1.64	F1SE26	12	K	39.844	0.00010968	Up	Voltage-dependent anion-selective channel protein 3 OS=Sus scrofa OX=9823 GN=VDAC3 PE=1 SV=3	VDAC3	K15041	1	1.5698e-05	174.4	2	CNTPTYCDLGK(1)AAK	0.069922	1.34407	2.86242	1.64662	0.0468431	0.0433369	0.0567201
map04022 cGMP-PKG signaling pathway	0.0315241	1.64	F1SE26	28	K	180.733	2.93037e-05	Up	Voltage-dependent anion-selective channel protein 3 OS=Sus scrofa OX=9823 GN=VDAC3 PE=1 SV=3	VDAC3	K15041	1	0.000281614	140.05	2	GYGFGMVK(1)IDLR	-0.28235	1.60456	1.72086	1.65621	0.00771306		0.0106626
map04022 cGMP-PKG signaling pathway	0.0315241	1.64	F1RRA6	215	K	39.974	0.00104458	Up	ADP/ATP translocase OS=Sus scrofa OX=9823 GN=SLC25A31 PE=3 SV=3	SLC25A31	K05863	1	1.32111e-06	147.71	2	ASYFGAYDTVK(1)GLLPK	-0.15014	1.10107	1.72213	2.09478	0.0328034	0.0492167
map04022 cGMP-PKG signaling pathway	0.0315241	1.64	F1RRA6	171	K	26.465	0.00101308	Up	ADP/ATP translocase OS=Sus scrofa OX=9823 GN=SLC25A31 PE=3 SV=3	SLC25A31	K05863	1	0.00145154	121.5	2	QFK(1)GLGDCIVK	0.077588	1.1325	1.84375	2.80529	0.11194	0.0427092	0.0638128
map04022 cGMP-PKG signaling pathway	0.0315241	1.64	F1S2F6	74	K	283.335	1.82758e-06	Up	Voltage-dependent anion-selective channel protein 2 OS=Sus scrofa OX=9823 GN=VDAC2 PE=3 SV=3	VDAC2	K15040	1	1.67683e-09	236.57	3	YK(1)WCEYGLTFTEK	0.75324	1.68526	2.23826	2.05538	0.0061038	0.00647463	0.00852342
map04022 cGMP-PKG signaling pathway	0.0315241	1.64	I3L8L8	656	K	3.37	0.00411691	Up	Sodium/potassium-transporting ATPase subunit alpha OS=Sus scrofa OX=9823 GN=LOC100157711 PE=1 SV=3	LOC100157711	K01539	1	0.00957737	91.265	2	LK(1)IPVDQVNAR	0.22803	1.74197	1.34312	1.54188	0.61044	0.308646	0.453941
map04022 cGMP-PKG signaling pathway	0.0315241	1.64	I3L8L8	847	K	10.904	0.000409895	Up	Sodium/potassium-transporting ATPase subunit alpha OS=Sus scrofa OX=9823 GN=LOC100157711 PE=1 SV=3	LOC100157711	K01539	1	5.63851e-20	273.79	2	NPK(1)TDNLVNHR	-1.1891	2.11753	1.29801	2.08042	0.172693	0.12391	0.207434
map04022 cGMP-PKG signaling pathway	0.0315241	1.64	Q29380	34	K	72.52	0.000138442	Up	Voltage-dependent anion-selective channel protein 3 OS=Sus scrofa OX=9823 GN=VDAC3 PE=2 SV=2	VDAC3	K15041	1	4.81093e-88	366.99	3	TK(1)SCSGVEFSTSGHAYTDTGK	0.64552	2.27947	1.43616	2.20276	0.0407486	0.0163791	0.024483
map04066 HIF-1 signaling pathway	0.402972	1.25	A0A286ZYX8	334	K	6.791	0.00515911	Up	Fructose-bisphosphate aldolase OS=Sus scrofa OX=9823 GN=ALDOA PE=1 SV=2	ALDOA	K01623	1	0.000276715	155.75	2	AAQEEYVK(1)R	-0.10553	1.26678	1.10946	2.85363	0.319463	0.261684	0.188978
map04066 HIF-1 signaling pathway	0.402972	1.25	A0A286ZYX8	346	K	13.397	8.81668e-05	Up	Fructose-bisphosphate aldolase OS=Sus scrofa OX=9823 GN=ALDOA PE=1 SV=2	ALDOA	K01623	1	1.8246e-68	350.18	2	ALANSLACQGK(1)YTPSGK	-0.050506	1.53952	1.70934	2.33438	0.143585	0.159933	0.113241
map04066 HIF-1 signaling pathway	0.402972	1.25	A0A286ZYX8	234	K	2.381	0.0415831	Up	Fructose-bisphosphate aldolase OS=Sus scrofa OX=9823 GN=ALDOA PE=1 SV=2	ALDOA	K01623	1	2.95095e-13	158.67	3	ALSDHHIYLEGTLLK(1)PNMVTPGHACTQK	-0.01806	1.89148	0.891527	1.44233	0.394682	0.708463	0.671513
map04066 HIF-1 signaling pathway	0.402972	1.25	A0A287B2H7	43	K	6.535	0.0122783	Up	L-lactate dehydrogenase OS=Sus scrofa OX=9823 GN=LDHA PE=3 SV=1	LDHA	K00016	1	2.50729e-11	191.95	3	DQLIHNLLK(1)EEHVPHNK	-0.46433	1.51358	1.54076	2.14935	0.530619	0.150079	0.115608
map04066 HIF-1 signaling pathway	0.402972	1.25	A0A287B2H7	27	K	9.41	0.000640596	Up	L-lactate dehydrogenase OS=Sus scrofa OX=9823 GN=LDHA PE=3 SV=1	LDHA	K00016	1	8.76591e-06	204	2	IPFGSK(1)STMATLK	0.09702	1.57728	1.35798	2.48837	0.244205	0.181847	0.150321
map04066 HIF-1 signaling pathway	0.402972	1.25	A0A287B2H7	88	K	8.849	0.00786298	Up	L-lactate dehydrogenase OS=Sus scrofa OX=9823 GN=LDHA PE=3 SV=1	LDHA	K00016	1	9.045e-09	201.3	3	LK(1)GEMMDLQHGSLFLR	-0.87575	1.08174	1.39151	2.17644	0.225115	0.125195
map04066 HIF-1 signaling pathway	0.402972	1.25	A0A287B2H7	253	K	4.195	0.0188506	Up	L-lactate dehydrogenase OS=Sus scrofa OX=9823 GN=LDHA PE=3 SV=1	LDHA	K00016	1	0.000666693	98.572	3	NLHPELGTDADK(1)EHWK	0.4551	1.43181	0.955315	2.45789	0.557872	0.36457	0.232546
map04066 HIF-1 signaling pathway	0.402972	1.25	A0A287B2H7	105	K	3.079	0.0390578	Up	L-lactate dehydrogenase OS=Sus scrofa OX=9823 GN=LDHA PE=3 SV=1	LDHA	K00016	1	0.0116506	110.79	2	TPK(1)IVSGK	-1.0115	1.08917	1.65129	1.36967	0.61528		0.274596
map04066 HIF-1 signaling pathway	0.402972	1.25	A0A287B2H7	346	K	4.975	0.00557657	Up	L-lactate dehydrogenase OS=Sus scrofa OX=9823 GN=LDHA PE=3 SV=1	LDHA	K00016	1	7.50937e-05	156.48	2	VTLTPEEEAHLK(1)K	-0.11169	1.82187		2.01984	0.517976	0.285752	0.354564
map04066 HIF-1 signaling pathway	0.402972	1.25	A0A287B950	32	K	5.817	0.0177343	Up	Elongin-C OS=Sus scrofa OX=9823 GN=ELOC PE=1 SV=1	ELOC	K03872	1	4.21082e-05	197.73	2	LISSDGHEFIVK(1)R	0.15777	0.953103	1.37276	2.79401	0.459941	0.270643	0.149545
map04066 HIF-1 signaling pathway	0.402972	1.25	I3LK59	343	K	3.171	0.00999385	Up	2-phospho-D-glycerate hydro-lyase OS=Sus scrofa OX=9823 GN=ENO1 PE=1 SV=3	ENO1	K01689	1	1.26995e-22	220.86	3	SCNCLLLK(1)VNQIGSVTESLQACK	-0.37956	1.01624	1.32546	2.21966	0.440753	0.44856	0.549329
map04066 HIF-1 signaling pathway	0.402972	1.25	I3LK59	28	K	3.349	0.00761987	Up	2-phospho-D-glycerate hydro-lyase OS=Sus scrofa OX=9823 GN=ENO1 PE=1 SV=3	ENO1	K01689	1	7.68637e-83	357.91	2	GNPTVEVDLHTAK(1)GLFR	-0.58225	1.35256	1.5779	1.68993	0.704122	0.351704	0.323785
map04066 HIF-1 signaling pathway	0.402972	1.25	I3LK59	281	K	2.912	0.0043442	Up	2-phospho-D-glycerate hydro-lyase OS=Sus scrofa OX=9823 GN=ENO1 PE=1 SV=3	ENO1	K01689	1	5.03185e-07	170.18	3	YISPDQLADLYK(1)SFIR	0.23146	1.42616	1.2829	1.35942		0.547818	0.383702
map04066 HIF-1 signaling pathway	0.402972	1.25	A0A5G2R718	34	K	6.023	0.0316931	Up	Pyruvate dehydrogenase E1 component subunit beta OS=Sus scrofa OX=9823 GN=PDHB PE=1 SV=1	PDHB	K00162	1	1.04594e-20	167.61	4	DAINQGMDEELERDEK(1)VFLLGEEVAQYDGAYK	-0.31808	1.03207	2.48971	0.97998	0.326682		0.171565
map04066 HIF-1 signaling pathway	0.402972	1.25	A0A5G2R718	50	K	6.433	0.000338382	Up	Pyruvate dehydrogenase E1 component subunit beta OS=Sus scrofa OX=9823 GN=PDHB PE=1 SV=1	PDHB	K00162	1	2.1295e-55	321.67	3	VFLLGEEVAQYDGAYK(1)VSR	-0.11923	1.30726	1.5305	1.69276	0.241922	0.227567
map04066 HIF-1 signaling pathway	0.402972	1.25	A0A5G2R718	336	K	25.703	0.000583753	Up	Pyruvate dehydrogenase E1 component subunit beta OS=Sus scrofa OX=9823 GN=PDHB PE=1 SV=1	PDHB	K00162	1	0.0255332	92.307	3	ILEDNSVPQVK(1)DIIFAIK(1)K	0.31701	1.47854	1.75327	2.5435	0.122807	0.0521125	0.0497732
map04066 HIF-1 signaling pathway	0.402972	1.25	A0A5G2R718	170	K	11.034	0.000616898	Up	Pyruvate dehydrogenase E1 component subunit beta OS=Sus scrofa OX=9823 GN=PDHB PE=1 SV=1	PDHB	K00162	1	0.00690861	120.65	2	GLIK(1)SAIR	-0.50635	1.84458	1.33623	2.32059	0.233349	0.133349	0.131903
map04066 HIF-1 signaling pathway	0.402972	1.25	A0A5G2R718	240	K	6.879	0.0205121	Up	Pyruvate dehydrogenase E1 component subunit beta OS=Sus scrofa OX=9823 GN=PDHB PE=1 SV=1	PDHB	K00162	1	2.61644e-25	205.84	4	PVGHCLEAATVLSK(1)EGIECEVINMR	-0.21928	1.99621	1.82199	0.740027	0.215947		0.22583
map04066 HIF-1 signaling pathway	0.402972	1.25	A0A5G2R718	166	K	14.707	0.00444135	Up	Pyruvate dehydrogenase E1 component subunit beta OS=Sus scrofa OX=9823 GN=PDHB PE=1 SV=1	PDHB	K00162	1	8.42777e-07	162.68	3	VVSPWSSEDAK(1)GLIK	-0.13568	1.72959		2.80764	0.214388	0.151972	0.0964119
map04066 HIF-1 signaling pathway	0.402972	1.25	A0A5G2R2Y3	11	K	4.232	0.00895507	Up	Ubiquitin-like domain-containing protein OS=Sus scrofa OX=9823 GN=ELOB PE=1 SV=1	ELOB	K03873	1	1.08579e-13	255.11	2	HK(1)TTIFTDAK	0.78671	1.3539	1.32081	2.17842	0.521479	0.410882	0.214509
map04066 HIF-1 signaling pathway	0.402972	1.25	F1SUF2	829	K	4.145	0.0183163	Up	Hexokinase OS=Sus scrofa OX=9823 GN=HK1 PE=1 SV=4	HK1	K00844	1	0.00228463	122.19	2	TVCGVVSK(1)R	-1.1759	1.63633		2.03518	0.666992	0.344027	0.317473
map04066 HIF-1 signaling pathway	0.402972	1.25	F1SUF2	489	K	2.587	0.0131535	Up	Hexokinase OS=Sus scrofa OX=9823 GN=HK1 PE=1 SV=4	HK1	K00844	1	0.000674092	182.13	2	DMLLEVK(1)R	0.42517	1.10817	1.13981	2.07915	0.536716	0.625178	0.510974
map04066 HIF-1 signaling pathway	0.402972	1.25	F1SUF2	48	K	5.221	0.000419509	Up	Hexokinase OS=Sus scrofa OX=9823 GN=HK1 PE=1 SV=4	HK1	K00844	1	0.00917649	125.31	2	EMK(1)NGLSR	0.58246	1.29211	1.63502	2.10837	0.357652	0.301056	0.305792
map04066 HIF-1 signaling pathway	0.402972	1.25	F1SUF2	764	K	8.566	0.00169788	Up	Hexokinase OS=Sus scrofa OX=9823 GN=HK1 PE=1 SV=4	HK1	K00844	1	0.000222132	163.9	2	NILIDFTK(1)R	-0.61003	1.80752	1.57856	1.98667	0.340037	0.134225	0.152986
map04066 HIF-1 signaling pathway	0.402972	1.25	F1SUF2	419	K	8.978	0.00115314	Up	Hexokinase OS=Sus scrofa OX=9823 GN=HK1 PE=1 SV=4	HK1	K00844	1	1.86313e-138	424.41	2	TTVGVDGSLYK(1)THPQYSR	0.076834	1.70899	1.49602	2.19367	0.306949	0.153352	0.141025
map04066 HIF-1 signaling pathway	0.402972	1.25	I3LCI2	244	K	14.326	7.06486e-05	Up	Pyruvate dehydrogenase E1 component subunit alpha OS=Sus scrofa OX=9823 GN=PDHA1 PE=1 SV=2	PDHA1	K00161	1	0.000402517	172.21	2	AAASTDYYK(1)R	0.24715	2.1465	1.89941	1.56258	0.162102	0.104595	0.124807
map04066 HIF-1 signaling pathway	0.402972	1.25	I3LCI2	83	K	2.468	0.0111998	Up	Pyruvate dehydrogenase E1 component subunit alpha OS=Sus scrofa OX=9823 GN=PDHA1 PE=1 SV=2	PDHA1	K00161	1	2.11455e-13	245.15	3	RMELK(1)ADQLYK(1)QK	-0.75819	1.26937	1.80276	1.19758	0.410631	0.633634	0.686031
map04066 HIF-1 signaling pathway	0.402972	1.25	I3LCI2	85	K	9.005	0.000162366	Up	Pyruvate dehydrogenase E1 component subunit alpha OS=Sus scrofa OX=9823 GN=PDHA1 PE=1 SV=2	PDHA1	K00161	1	0.000436708	138.22	2	ADQLYK(1)QK(1)IIR	-0.94509	1.44813	1.61689	2.33528	0.182028	0.226178	0.19149
map04066 HIF-1 signaling pathway	0.402972	1.25	I3LCI2	149	K	30.357	0.00264492	Up	Pyruvate dehydrogenase E1 component subunit alpha OS=Sus scrofa OX=9823 GN=PDHA1 PE=1 SV=2	PDHA1	K00161	1	0.000497327	166.66	2	GK(1)GGSMHMYAK	-0.26957	1.20887	1.1745	2.50919		0.0416124	0.0658308
map04066 HIF-1 signaling pathway	0.402972	1.25	I3LCI2	77	K	7.793	0.000756203	Up	Pyruvate dehydrogenase E1 component subunit alpha OS=Sus scrofa OX=9823 GN=PDHA1 PE=1 SV=2	PDHA1	K00161	1	2.11455e-13	245.15	3	RMELK(1)ADQLYK(1)QK	-0.75819	1.64932	1.96265	1.70571	0.290556	0.25052	0.141251
map04066 HIF-1 signaling pathway	0.402972	1.25	I3LCI2	321	K	7.822	0.000142572	Up	Pyruvate dehydrogenase E1 component subunit alpha OS=Sus scrofa OX=9823 GN=PDHA1 PE=1 SV=2	PDHA1	K00161	1	7.16903e-05	200.93	2	SK(1)SDPIMLLK(1)DR	-0.73938	1.52532	2.28207	1.51246	0.220389	0.247774	0.211984
map04066 HIF-1 signaling pathway	0.402972	1.25	I3LCI2	277	K	5.209	0.00236988	Up	Pyruvate dehydrogenase E1 component subunit alpha OS=Sus scrofa OX=9823 GN=PDHA1 PE=1 SV=2	PDHA1	K00161	1	2.82417e-14	251.03	2	SGK(1)GPILMELQTYR	2.0211	1.31828	1.80506	1.30939		0.244799	0.322474
map04066 HIF-1 signaling pathway	0.402972	1.25	I3LCI2	313	K	13.059	0.000364323	Up	Pyruvate dehydrogenase E1 component subunit alpha OS=Sus scrofa OX=9823 GN=PDHA1 PE=1 SV=2	PDHA1	K00161	1	4.7682e-05	200.93	2	SK(1)SDPIMLLK(1)DR	-0.73938	1.98833	2.05998	1.5249	0.20686	0.115592	0.104335
map04066 HIF-1 signaling pathway	0.402972	1.25	F1S4S3	20	K	5.751	0.00749399	Up	2-phospho-D-glycerate hydro-lyase OS=Sus scrofa OX=9823 GN=ENO4 PE=3 SV=4	ENO4	K01689	1	6.80195e-05	177.7	2	LK(1)QQALEYYR	-0.02886	1.56715	1.0337	2.51044	0.447789	0.216263	0.224661
map04066 HIF-1 signaling pathway	0.402972	1.25	F1SFX0	228	K	7.402	0.0103166	Up	L-lactate dehydrogenase OS=Sus scrofa OX=9823 GN=LDHC PE=2 SV=2	LDHC	K00016	1	3.09141e-114	393.33	2	DQWK(1)NIHK	-0.90744	1.1003	1.10626	2.38033	0.220709	0.192398
map04066 HIF-1 signaling pathway	0.402972	1.25	F1SFX0	81	K	3.789	0.00124263	Up	L-lactate dehydrogenase OS=Sus scrofa OX=9823 GN=LDHC PE=2 SV=2	LDHC	K00016	1	3.39125e-06	202.27	2	IVSGK(1)DYSVSANSK	-0.80078	1.16144	1.68393	1.90164	0.469981	0.405258	0.377748
map04066 HIF-1 signaling pathway	0.402972	1.25	F1SFX0	224	K	7.918	0.00282901	Up	L-lactate dehydrogenase OS=Sus scrofa OX=9823 GN=LDHC PE=2 SV=2	LDHC	K00016	1	5.23224e-06	218.58	2	LGTDSDK(1)DQWK	0.052794	1.91094	1.2493	2.16694	0.356349	0.141774	0.174711
map04066 HIF-1 signaling pathway	0.402972	1.25	F1SFX0	217	K	9.568	0.00607823	Up	L-lactate dehydrogenase OS=Sus scrofa OX=9823 GN=LDHC PE=2 SV=2	LDHC	K00016	1	1.48714e-15	251.84	2	TLDPK(1)LGTDSDKDQWK	0.3983	2.12055	2.20182		0.348453	0.181568	0.147612
map04066 HIF-1 signaling pathway	0.402972	1.25	F1SFX0	278	K	2.695	0.0275503	Up	L-lactate dehydrogenase OS=Sus scrofa OX=9823 GN=LDHC PE=2 SV=2	LDHC	K00016	1	1.22758e-06	178.1	3	VHPVSTMVK(1)GLYGIK	-0.54755	1.1205	1.22741	2.02824	0.774817	0.504547	0.344485
map04066 HIF-1 signaling pathway	0.402972	1.25	P00355	3	K	2.516	0.00208899	Up	Glyceraldehyde-3-phosphate dehydrogenase OS=Sus scrofa OX=9823 GN=GAPDH PE=1 SV=4	GAPDH	K00134	1	0.0112771	104.44	2	VK(1)VGVNGFGR	-0.14158	1.40417	1.72818		0.662679	0.581973	0.622998
map04066 HIF-1 signaling pathway	0.402972	1.25	Q1KYT0	80	K	12.668	0.0019594	Up	Beta-enolase OS=Sus scrofa OX=9823 GN=ENO3 PE=2 SV=1	ENO3	K01689	1	0.00811492	93.111	2	TLGPALLEK(1)K	-1.5338	1.60927	1.67882	1.46193	0.164851	0.0851296
map04066 HIF-1 signaling pathway	0.402972	1.25	Q1KYT0	28	K	2.74	0.0413296	Up	Beta-enolase OS=Sus scrofa OX=9823 GN=ENO3 PE=2 SV=1	ENO3	K01689	1	7.49674e-05	121.31	3	GNPTVEVDLHTAK(1)GR	0.86584	1.59564	1.59383	0.83211	0.474158	0.504258
map04070 Phosphatidylinositol signaling system	0.378978	1.56	A0A287AHS0	21	K	4.754	0.00469786	Up	Calmodulin(predicted) OS=Sus scrofa OX=9823 GN=CALM3 PE=1 SV=1	CALM3	K02183	1	1.01745e-19	255.16	2	EAFSLFDK(1)DGDGTITTK	0.14526	1.61881	1.6203	1.71819	0.565219	0.228495	0.248997
map04070 Phosphatidylinositol signaling system	0.378978	1.56	A0A287AHS0	94	K	9.598	0.00170787	Up	Calmodulin(predicted) OS=Sus scrofa OX=9823 GN=CALM3 PE=1 SV=1	CALM3	K02183	1	3.62565e-40	305.84	3	VFDK(1)DGNGYISAAELR	-0.021987	1.60934	1.73629	2.08824	0.314341	0.123679	0.128108
map04070 Phosphatidylinositol signaling system	0.378978	1.56	A0A5G2QC85	382	K	2.222	0.0286319	Up	Phosphoinositide phospholipase C OS=Sus scrofa OX=9823 GN=PLCZ1 PE=4 SV=1	PLCZ1	K05861	1	3.3359e-06	126.17	2	IATALSDLVIYTK(1)VEK	-0.20873	1.17597	1.11705	1.553	0.695598	0.458385
map04070 Phosphatidylinositol signaling system	0.378978	1.56	F1RW19	1022	K	31.119	0.00375724	Up	Diacylglycerol kinase OS=Sus scrofa OX=9823 GN=DGKK PE=3 SV=3	DGKK	K00901	1	0.0217322	85.212	2	YK(1)NAAQMLTR	-2.3726	1.54728	0.936623	2.41123	0.0672823	0.0375866
map04137 Mitophagy - animal	0.378978	1.56	A0A286ZVG1	191	K	2.208	0.01632	Up	Serine/threonine-protein phosphatase PGAM5, mitochondrial isoform 2 (Fragment)(predicted) OS=Sus scrofa OX=9823 GN=PGAM5 PE=4 SV=1	PGAM5	K15637	1	2.52333e-10	156.43	3	EGAPIEPDPPVSHWK(1)PEAVYYEDGAR	0.015863	1.61631	1.59679	0.916439	0.611117	0.590051	0.669293
map04137 Mitophagy - animal	0.378978	1.56	A0A286ZVG1	144	K	16.945	0.000430858	Up	Serine/threonine-protein phosphatase PGAM5, mitochondrial isoform 2 (Fragment)(predicted) OS=Sus scrofa OX=9823 GN=PGAM5 PE=4 SV=1	PGAM5	K15637	1	0.000939454	187.41	2	FNK(1)IVHSSMTR	-1.2601	1.83223	2.08566	1.74775	0.130179	0.0617793	0.142405
map04137 Mitophagy - animal	0.378978	1.56	A0A287BBE8	100	K	5.738	0.000475695	Up	Casein kinase 2 alpha 2 OS=Sus scrofa OX=9823 GN=CSNK2A2 PE=1 SV=1	CSNK2A2	K03097	1	0.00111354	101.6	4	ALDYCHSK(1)GIMHR	-2.4626	1.59418	1.33208	2.18326	0.306416	0.332012	0.252061
map04137 Mitophagy - animal	0.378978	1.56	A0A287BBE8	209	K	19.557	0.00126326	Up	Casein kinase 2 alpha 2 OS=Sus scrofa OX=9823 GN=CSNK2A2 PE=1 SV=1	CSNK2A2	K03097	1	9.05983e-05	190.86	2	VLGTDELYGYLK(1)K	0.1723	1.42857	1.53595	1.87067		0.107058	0.0577632
map04137 Mitophagy - animal	0.378978	1.56	P67872	147	K	8.043	0.00354937	Up	Casein kinase II subunit beta OS=Sus scrofa OX=9823 GN=CSNK2B PE=2 SV=1	CSNK2B	K03115	1	0.000100955	172.98	2	CMDVYTPK(1)SSR	-0.34161	1.30143	1.21341	2.82165	0.286659	0.148415	0.228427
map04137 Mitophagy - animal	0.378978	1.56	P67872	139	K	7.776	0.0147529	Up	Casein kinase II subunit beta OS=Sus scrofa OX=9823 GN=CSNK2B PE=2 SV=1	CSNK2B	K03115	1	5.38032e-05	147.74	2	LYCPK(1)CMDVYTPK	-0.67141	1.46398	0.827234	2.31397		0.211193	0.183629
map04212 Longevity regulating pathway - worm	0.19594	1.56	A0A286ZRL1	207	K	21.097	0.000452525	Up	ATP-dependent Clp protease proteolytic subunit OS=Sus scrofa OX=9823 GN=CLPP PE=1 SV=1	CLPP	K01358	1	0.000871267	188.49	2	QLYSIYAK(1)HTK	-0.52009	1.3331	1.57333	1.94041	0.0881838	0.0649798
map04212 Longevity regulating pathway - worm	0.19594	1.56	A0A287A4Z2	122	K	12.103	0.00052399	Up	Superoxide dismutase OS=Sus scrofa OX=9823 GN=SOD2 PE=1 SV=2	SOD2	K04564	1	0.000532854	141.39	2	GELLEAIK(1)R	-0.11682	1.32529	1.94315	2.27366	0.213671	0.120471	0.123755
map04212 Longevity regulating pathway - worm	0.19594	1.56	A0A287A4Z2	68	K	5.991	0.0229553	Up	Superoxide dismutase OS=Sus scrofa OX=9823 GN=SOD2 PE=1 SV=2	SOD2	K04564	1	1.16914e-19	193.27	3	HHAAYVNNLNVVEEK(1)YQEALK(1)K	-0.17281	1.24042	1.30213	2.59918	0.0936406	0.284549	0.480087
map04212 Longevity regulating pathway - worm	0.19594	1.56	A0A287A4Z2	74	K	12.163	8.03885e-05	Up	Superoxide dismutase OS=Sus scrofa OX=9823 GN=SOD2 PE=1 SV=2	SOD2	K04564	1	1.16914e-19	193.27	2	YQEALK(1)K	-0.51462	1.71226	1.63501	2.19689	0.118425	0.178052	0.159358
map04212 Longevity regulating pathway - worm	0.19594	1.56	F1RGJ3	342	K	34.837	0.000302745	Up	75 kDa glucose-regulated protein OS=Sus scrofa OX=9823 GN=HSPA9 PE=1 SV=4	HSPA9	K04043	1	1.18894e-41	296.16	3	AMQDAEVSK(1)SDIGEVILVGGMTR	2.9905	1.29141	2.63377	1.9074	0.0674407	0.0657922	0.034192
map04212 Longevity regulating pathway - worm	0.19594	1.56	F1RGJ3	325	K	9.782	0.00189365	Up	75 kDa glucose-regulated protein OS=Sus scrofa OX=9823 GN=HSPA9 PE=1 SV=4	HSPA9	K04043	1	8.55518e-14	247.96	2	AQFEGIVTDLIK(1)R	-0.53534	1.69373	1.5587	2.19108	0.170457	0.287189	0.0988414
map04212 Longevity regulating pathway - worm	0.19594	1.56	F1RGJ3	528	K	11.325	0.00310874	Up	75 kDa glucose-regulated protein OS=Sus scrofa OX=9823 GN=HSPA9 PE=1 SV=4	HSPA9	K04043	1	0.00111548	126.67	2	DDIENMVK(1)NAEK	0.33125	1.77736	1.80728	1.92855	0.292841	0.0729111	0.121052
map04212 Longevity regulating pathway - worm	0.19594	1.56	F1RGJ3	103	K	11.674	0.000554202	Up	75 kDa glucose-regulated protein OS=Sus scrofa OX=9823 GN=HSPA9 PE=1 SV=4	HSPA9	K04043	1	0.00366077	135.77	2	DIK(1)NVPFK	-0.13971	1.84553	1.40896	2.27208	0.22742	0.124924	0.121079
map04212 Longevity regulating pathway - worm	0.19594	1.56	F1RGJ3	152	K	52.474	0.00416047	Up	75 kDa glucose-regulated protein OS=Sus scrofa OX=9823 GN=HSPA9 PE=1 SV=4	HSPA9	K04043	1	3.62472e-28	202.58	3	ETAENYLGHTAK(1)NAVITVPAYFNDSQR	0.42335	2.27947	1.75055	1.85778	0.00592061	0.0636331	0.0426508
map04212 Longevity regulating pathway - worm	0.19594	1.56	F1RGJ3	265	K	8.848	0.0299604	Up	75 kDa glucose-regulated protein OS=Sus scrofa OX=9823 GN=HSPA9 PE=1 SV=4	HSPA9	K04043	1	5.92944e-40	300.89	2	ETGVDLTK(1)DNMALQR	0.62539		2.3975	1.19631	0.232798	0.173394
map04212 Longevity regulating pathway - worm	0.19594	1.56	F1RGJ3	565	K	2.784	0.0234855	Up	75 kDa glucose-regulated protein OS=Sus scrofa OX=9823 GN=HSPA9 PE=1 SV=4	HSPA9	K04043	1	4.39771e-22	266.74	2	MEEFK(1)DQLPADECNK	-0.50561	1.52088	1.67694	1.21671	0.403246	0.323382	0.858834
map04212 Longevity regulating pathway - worm	0.19594	1.56	F1RGJ3	359	K	14.007	0.000623636	Up	75 kDa glucose-regulated protein OS=Sus scrofa OX=9823 GN=HSPA9 PE=1 SV=4	HSPA9	K04043	1	1.58999e-39	315.13	3	MPK(1)VQQTVQDLFGR	-1.6914	1.28822	2.07194	2.24002	0.194017	0.102187	0.103616
map04212 Longevity regulating pathway - worm	0.19594	1.56	F1RGJ3	100	K	4.15	0.00213714	Up	75 kDa glucose-regulated protein OS=Sus scrofa OX=9823 GN=HSPA9 PE=1 SV=4	HSPA9	K04043	1	1.1409e-12	247.13	2	YDDPEVQK(1)DIK	-0.21289	1.5036	2.20524	1.12609	0.380212	0.410039	0.374822
map04212 Longevity regulating pathway - worm	0.19594	1.56	A0A287ATN8	58	K	22.05	3.44271e-05	Up	60 kDa chaperonin OS=Sus scrofa OX=9823 GN=HSPD1 PE=1 SV=1	HSPD1	K04077	1	2.53861e-12	173.58	3	ALMLQGVDLLADAVAVTMGPK(1)GR	-0.1519	1.51486	1.74759	1.59082		0.0788	0.0679322
map04212 Longevity regulating pathway - worm	0.19594	1.56	A0A287ATN8	359	K	2.718	0.0457344	Up	60 kDa chaperonin OS=Sus scrofa OX=9823 GN=HSPD1 PE=1 SV=1	HSPD1	K04077	1	0.00953437	103.56	2	DDAMLLK(1)GK	-0.4402	1.10206	1.63393	1.65039	0.975489	0.318327	0.319798
map04212 Longevity regulating pathway - worm	0.19594	1.56	A0A287ATN8	205	K	12.767	0.000344302	Up	60 kDa chaperonin OS=Sus scrofa OX=9823 GN=HSPD1 PE=1 SV=1	HSPD1	K04077	1	2.11923e-16	254.47	2	DGK(1)TLNDELEIIEGMK	-0.25632	1.66014	1.73216	2.17188	0.188965	0.0926976	0.154158
map04212 Longevity regulating pathway - worm	0.19594	1.56	A0A287ATN8	191	K	6.072	0.0101469	Up	60 kDa chaperonin OS=Sus scrofa OX=9823 GN=HSPD1 PE=1 SV=1	HSPD1	K04077	1	3.03527e-05	172.88	2	EIGNIISDAMK(1)K	-0.20863	1.14996	1.70161	1.65377	0.334534	0.160136
map04212 Longevity regulating pathway - worm	0.19594	1.56	A0A287ATN8	156	K	23.939	0.00170586	Up	60 kDa chaperonin OS=Sus scrofa OX=9823 GN=HSPD1 PE=1 SV=1	HSPD1	K04077	1	1.38748e-06	151.98	2	GVMLAVDAVIAELK(1)K	0.087446	1.00689	1.82176	2.03588		0.0741241	0.0613448
map04212 Longevity regulating pathway - worm	0.19594	1.56	A0A287ATN8	292	K	36.844	9.40311e-07	Up	60 kDa chaperonin OS=Sus scrofa OX=9823 GN=HSPD1 PE=1 SV=1	HSPD1	K04077	1	0.0028913	112.8	2	LK(1)VGLQVVAVK	-0.591	1.95029	1.87864	2.01253	0.0461197	0.0582791	0.0541463
map04212 Longevity regulating pathway - worm	0.19594	1.56	A0A287ATN8	72	K	4.643	0.0169023	Up	60 kDa chaperonin OS=Sus scrofa OX=9823 GN=HSPD1 PE=1 SV=1	HSPD1	K04077	1	2.97506e-07	198.49	2	TVIIEQSWGSPK(1)VTK	-0.076069	1.43376	2.09362	1.40931	0.665426	0.175365	0.22251
map04212 Longevity regulating pathway - worm	0.19594	1.56	A0A287ATN8	352	K	11.316	0.00244626	Up	60 kDa chaperonin OS=Sus scrofa OX=9823 GN=HSPD1 PE=1 SV=1	HSPD1	K04077	1	8.65723e-05	132.5	2	VGEVIVTK(1)DDAMLLK	-0.21896	2.0677	2.34712		0.277512	0.156074	0.151597
map04212 Longevity regulating pathway - worm	0.19594	1.56	A0A287ATN8	417	K	6.758	0.00100549	Up	60 kDa chaperonin OS=Sus scrofa OX=9823 GN=HSPD1 PE=1 SV=1	HSPD1	K04077	1	5.53116e-39	314.35	2	VGGTSDVEVNEK(1)K	1.0822	1.65332	1.94133	1.63196	0.233559	0.367757	0.172077
map04212 Longevity regulating pathway - worm	0.19594	1.56	A0A287ATN8	91	K	21.244	0.000378877	Up	60 kDa chaperonin OS=Sus scrofa OX=9823 GN=HSPD1 PE=1 SV=1	HSPD1	K04077	1	0.0143671	138.85	2	YK(1)NIGAK	-1.7125	1.91354	1.66677	2.14996	0.140878	0.0564837	0.0723748
map04212 Longevity regulating pathway - worm	0.19594	1.56	F1S5N4	128	K	13.673	0.044569	Up	Glutathione-dependent dehydroascorbate reductase OS=Sus scrofa OX=9823 GN=GSTO2 PE=3 SV=1	GSTO2	K00799	1	3.29179e-05	160.91	3	VPHLTK(1)ECLVALR	-0.6671	0.918327	0.86906	2.98017	0.19823		0.0342179
map04212 Longevity regulating pathway - worm	0.19594	1.56	F1S5N4	59	K	45.542	0.00415107	Up	Glutathione-dependent dehydroascorbate reductase OS=Sus scrofa OX=9823 GN=GSTO2 PE=3 SV=1	GSTO2	K00799	1	0.000381481	105.52	2	NK(1)PEWYFTK	0.087145	0.984984	1.51004	3.37606	0.0958327	0.0161414	0.0169418
[truncated: 997 more rows]

## Sheet: Down
KEGG pathway	Mapping	Background	All Mapping	All Background	Fold Enrichment	Fisher's exact test p value	-log10(p value)	Related proteins
[truncated: 12 more rows]

## Sheet: Down Pathway2Protein
KEGG pathway	Fisher's exact test p value	Fold Enrichment	Protein accession	Position	Amino acid	Fts/Fs Ratio	Fts/Fs P value	Regulated Type	Protein description	Gene name	KEGG KO No.	Localization probability	PEP	Score	Charge	Modified sequence	Mass error [ppm]	Fts_1	Fts_2	Fts_3	Fs_1	Fs_2	Fs_3
[truncated: 277 more rows]

[truncated: 2 more sheets: all, all Pathway2Protein]
